# Supplementary material for: Technology Invention and Mechanism Analysis of Rapid Rooting of Taxus × media Rehder Branches Induced by Agrobacterium rhizogenes
Source: MDPI journal article supplement (doi:10.3390/ijms25010375), 2023-12-27
Supplement: s1 [file s1]

**Title:** Technology Invention and Mechanism Analysis of Rapid Rooting of *Taxus media* Branches Induced by *Agrobacterium rhizogenes*  
**Authors:** Ying Wang, Xiumei Luo, Haotian Su, Ge Guan, Shuang Liu, Maozhi Ren

**Table S1.** The overall information of sequencing data and the mapping rates of clean reads to reference genome.

| Sample name  | WR_1                 | WR_2                 | WR_3                 | TR_1                 | TR_2                 | TR_3                 |
|--------------|----------------------|----------------------|----------------------|----------------------|----------------------|----------------------|
| Total reads  | 45157926             | 47208350             | 41808328             | 45319254             | 46702014             | 49204398             |
| GC content   | 45.16%               | 45.17%               | 47.63%               | 45.02%               | 44.94%               | 44.94%               |
| Q20          | 98.31%               | 98.41%               | 98.67%               | 98.41%               | 98.55%               | 98.44%               |
| Total mapped | 40291138<br>(89.22%) | 42254496<br>(89.51%) | 36430630<br>(87.14%) | 40884100<br>(90.21%) | 42086334<br>(90.12%) | 44091726<br>(89.61%) |
