# Supplementary material for: Technology Invention and Mechanism Analysis of Rapid Rooting of Taxus × media Rehder Branches Induced by Agrobacterium rhizogenes
Source: Int J Mol Sci. 2023 Dec 27;25(1):375. doi: 10.3390/ijms25010375 (PMC10779043; doi:10.3390/ijms25010375)
Supplement: Supplementary file 1 [file ijms-25-00375-s001.zip]

Archive with 8 entries (8 files):
- Fig. S1. - S5..pdf
- Table S1. The overall information of sequencing data and the mapping rates of clean reads to reference genome.pdf
- Table S2 DEGs in TR vs WR.xlsx
- Table S3. The downregulated GO terms in DEGs of TRvsWR.xlsx
- Table S4. The upregulated GO terms in DEGs of TRvsWR.xlsx
- Table S5.  The total metabolites detected in the WR and TR.xlsx
- Table S6. Differentially expressed metabolites in TR vs WR.xlsx
- Table S7. KEGG pathways correlated with DEGs and DEMs.xlsx
