# Supplementary material for: Technology Invention and Mechanism Analysis of Rapid Rooting of Taxus × media Rehder Branches Induced by Agrobacterium rhizogenes
Source: Int J Mol Sci. 2023 Dec 27;25(1):375. doi: 10.3390/ijms25010375 (PMC10779043; doi:10.3390/ijms25010375)
Supplement: Supplementary file 1 [file ijms-25-00375-s001.zip › Table S2 DEGs in TR vs WR.xlsx]

## Sheet: Table S2 DEGs in TR vs WR
Title: Technology Invention and Mechanism Analysis of Rapid Rooting of Taxus media Branches Induced by Agrobacterium rhizogenes
Authors: Ying Wang, Xiumei Luo, Haotian Su, Ge Guan, Shuang Liu, Maozhi Ren
Supplementary Table S2. DEGs in TR vs WR.
Gene_id	readcount_TR	readcount_WR	log2FoldChange	pval	padj	gene_name	product
Novel00004	28.0221	2.32455	3.5915	0.0014016	0.0074739	-	-
Novel00006	26.8363	179.628	-2.7428	4.73e-16	2.11e-14	-	-
Novel00012	130.988	43.2597	1.5983	7.9e-07	9.47e-06	-	-
Novel00021	466.367	303.581	0.61938	0.0074539	0.030278	-	-
Novel00027	183.125	78.6657	1.219	6.75e-05	0.00052029	-	-
Novel00028	13.1784	0.455676	4.854	0.00019116	0.0013188	-	-
Novel00029	128.334	12.9605	3.3077	1.34e-15	5.71e-14	-	-
Novel00031	349.322	222.994	0.64755	0.011702	0.044031	-	-
Novel00034	616.333	337.605	0.86837	0.0004088	0.0025528	-	-
Novel00036	14919	4886.69	1.6102	1.13e-09	2.21e-08	-	-
Novel00041	34.0998	4.43218	2.9437	1.12e-05	0.00010354	-	-
Novel00042	88.9592	34.1549	1.3811	0.0022089	0.010938	-	-
Novel00043	62.3686	25.5361	1.2883	0.012979	0.047849	-	-
Novel00044	36.3347	10.8313	1.7461	0.00069104	0.0040408	-	-
Novel00067	35.9944	8.92774	2.0114	0.00035535	0.0022599	-	-
Novel00068	8.25903	26.5963	-1.6872	0.0044997	0.01998	-	-
Novel00070	836.918	5024.27	-2.5858	9.27e-07	1.1e-05	-	-
Novel00076	21.0836	0.999043	4.3994	1.05e-05	9.78e-05	-	-
Novel00080	1795.48	2774.05	-0.62763	0.0036792	0.016867	-	-
Novel00083	3954.07	2377.73	0.73375	0.0009165	0.0051743	-	-
Novel00090	37.3531	95.4599	-1.3537	0.00024098	0.0016133	-	-
Novel00095	7.79769	23.7334	-1.6058	0.013559	0.049611	-	-
Novel00104	64.1764	25.3432	1.3404	0.0012738	0.0068852	-	-
Novel00105	74.7321	26.7868	1.4802	0.00021431	0.0014558	-	-
Novel00110	292.316	2081.31	-2.8319	1.47e-32	2.83e-30	-	-
Novel00116	7.76361	29.9727	-1.9488	0.0010273	0.0057185	-	-
Novel00118	81.111	28.3879	1.5146	6.28e-05	0.0004879	-	-
Novel00122	456.371	63.8467	2.8375	1.73e-23	1.63e-21	-	-
Novel00124	21.8147	5.99645	1.8631	0.0095668	0.03735	-	-
Novel00128	53.4468	23.4812	1.1866	0.007786	0.03138	-	-
Novel00133	139.617	55.3553	1.3347	4.55e-05	0.00036524	-	-
Novel00136	708.808	1064.61	-0.58685	0.0072334	0.029514	-	-
Novel00137	107.59	38.5496	1.4808	1.89e-05	0.00016586	-	-
Novel00140	32.3885	72.2909	-1.1583	0.002122	0.010602	-	-
Novel00142	233.301	412.147	-0.82097	0.00064106	0.00379	-	-
Novel00150	7.49622	0	Inf	0.0030753	0.014459	-	-
Novel00152	721.804	1158.66	-0.68278	0.0024982	0.01209	-	-
Novel00153	109.662	295.555	-1.4304	9.31e-08	1.35e-06	-	-
Novel00157	918.839	1654.98	-0.84893	0.00011574	0.00084326	-	-
Novel00158	29.1687	66.7955	-1.1953	0.0031027	0.014573	-	-
Novel00163	713.877	326.881	1.1269	0.00051914	0.0031535	-	-
Novel00167	190.448	34.4835	2.4654	1.12e-13	3.76e-12	-	-
Novel00176	99.9129	50.3557	0.98852	0.0085844	0.034103	-	-
Novel00179	31.5346	9.95273	1.6638	0.0049348	0.021575	-	-
Novel00180	50.7141	21.632	1.2292	0.005779	0.02452	-	-
Novel00184	43.9414	90.1434	-1.0366	0.0021663	0.010764	-	-
Novel00190	64.5338	796.839	-3.6262	3.71e-41	1.44e-38	-	-
Novel00195	0	103.123	#NAME?	1.43e-32	2.76e-30	-	-
Novel00197	41.4315	15.8025	1.3906	0.006404	0.02677	-	-
Novel00198	1087.08	1603.64	-0.56088	0.009801	0.038154	-	-
Novel00199	81.3575	22.2696	1.8692	2.79e-05	0.00023635	-	-
Novel00200	68.116	26.3663	1.3693	0.00051152	0.0031139	-	-
Novel00209	70.7476	28.5108	1.3112	0.002747	0.013136	-	-
Novel00211	200.496	24.8264	3.0136	1.34e-18	8.09e-17	-	-
Novel00217	109.97	208.374	-0.92206	0.00073467	0.004259	-	-
Novel00218	331.365	699.885	-1.0787	3.83e-06	3.98e-05	-	-
Novel00219	4.70661	29.081	-2.6273	4.35e-05	0.00035116	-	-
Novel00221	12.3462	36.8731	-1.5785	0.0027619	0.013202	-	-
Novel00226	441.565	116.429	1.9232	1.09e-05	0.0001014	-	-
Novel00234	102.09	193.158	-0.91994	0.0015881	0.0083069	-	-
Novel00246	36.933	9.73582	1.9235	0.00068005	0.0039831	-	-
Novel00251	49.2945	120.799	-1.2931	7.39e-05	0.00056444	-	-
Novel00252	249.224	105.004	1.247	0.0002151	0.0014602	-	-
Novel00259	8.62806	33.5809	-1.9605	0.0007475	0.0043298	-	-
Novel00262	178.092	90.304	0.97976	0.0008345	0.0047693	-	-
Novel00264	72.1433	31.8768	1.1784	0.0025226	0.012196	-	-
Novel00270	232.095	122.362	0.92356	0.0012848	0.0069366	-	-
Novel00271	705.816	324.211	1.1224	6.56e-06	6.48e-05	-	-
Novel00272	89.5983	18.8895	2.2459	5.1e-07	6.34e-06	-	-
Novel00273	93.0138	2.14916	5.4356	9.88e-17	4.77e-15	-	-
Novel00275	33.0673	89.2596	-1.4326	0.0001352	0.00096689	-	-
Novel00279	2.58101	15.767	-2.6109	0.0042526	0.019069	-	-
Novel00280	37.2838	2.92911	3.67	1.5e-05	0.00013502	-	-
Novel00281	79.6426	6.74088	3.5625	1.14e-13	3.81e-12	-	-
Novel00295	54.4129	128.871	-1.2439	7.49e-05	0.0005707	-	-
Novel00298	25.7443	8.09507	1.6691	0.0077593	0.031286	-	-
Novel00304	198.35	718.242	-1.8564	0.0057037	0.02427	-	-
Novel00308	29.2192	3.514	3.0557	1.06e-05	9.93e-05	-	-
Novel00309	1907.78	2874.56	-0.59144	0.0061821	0.025958	-	-
Novel00312	2.29364	49.8871	-4.443	1.3e-12	3.79e-11	-	-
Novel00314	160.962	18.0303	3.1582	8.48e-18	4.67e-16	-	-
Novel00315	809.094	491.988	0.71768	0.0033341	0.015488	-	-
Novel00316	407.343	245.273	0.73186	0.0046623	0.020587	-	-
Novel00317	493.954	1048.02	-1.0852	5.07e-06	5.13e-05	-	-
Novel00328	1784.48	1067.53	0.74123	0.0011142	0.0061361	-	-
Novel00334	2271.11	6759.38	-1.5735	6.82e-11	1.59e-09	-	-
Novel00336	30.2106	74.8447	-1.3088	0.00085163	0.0048535	-	-
Novel00349	104.496	265.631	-1.346	0.00057167	0.0034263	-	-
Novel00350	98.1782	177.388	-0.85343	0.0020407	0.010252	-	-
Novel00351	125.255	312.102	-1.3171	1.02e-06	1.19e-05	-	-
Novel00363	26.0035	501.137	-4.2684	1.1e-44	5.04e-42	-	-
Novel00364	49.4149	21.5511	1.1972	0.0094058	0.036818	-	-
Novel00372	322.463	541.608	-0.74812	0.002997	0.014157	-	-
Novel00373	55.2981	16.1636	1.7745	0.0012091	0.0065971	-	-
Novel00374	1710.89	2587.79	-0.59698	0.0049225	0.021534	-	-
Novel00380	35.881	90.4234	-1.3335	0.00024396	0.0016291	-	-
Novel00381	158.408	36.928	2.1009	7.14e-06	6.99e-05	-	-
Novel00383	9792.31	3377.37	1.5357	7.97e-11	1.85e-09	-	-
Novel00384	3246.4	1247.91	1.3793	2.98e-07	3.9e-06	-	-
Novel00389	47.7895	3.20502	3.8983	7.58e-10	1.53e-08	-	-
Novel00390	9.47375	26.18	-1.4665	0.011071	0.042097	-	-
Novel00391	122.925	48.1672	1.3517	8.49e-05	0.00063883	-	-
Novel00392	9.76523	0.326458	4.9027	0.0023987	0.01171	-	-
Novel00407	164.482	2563.35	-3.962	9e-56	8.79e-53	-	-
Novel00409	23.7093	1.38451	4.098	5.52e-06	5.55e-05	-	-
Novel00415	2006.27	690.064	1.5397	1.23e-11	3.18e-10	-	-
Novel00421	1568.93	366.344	2.0985	5.14e-10	1.06e-08	-	-
Novel00426	141.041	49.7115	1.5045	3.04e-06	3.22e-05	-	-
Novel00441	139.604	48.6428	1.521	4.9e-05	0.00039059	-	-
Novel00445	35.5472	2.08797	4.0896	3.34e-08	5.21e-07	-	-
Novel00446	1090.79	1925.63	-0.81996	0.0002308	0.0015552	-	-
Novel00465	167.407	80.1349	1.0629	0.00017211	0.0011985	-	-
Novel00479	56.0602	3.40445	4.0415	8.52e-12	2.25e-10	-	-
Novel00483	18.3586	77.6293	-2.0801	5.36e-07	6.62e-06	-	-
Novel00487	247.892	88.0658	1.4931	1.26e-07	1.78e-06	-	-
Novel00494	44.5802	6.72121	2.7296	5.77e-07	7.09e-06	-	-
Novel00496	11.4918	40.4335	-1.815	0.005559	0.023775	-	-
Novel00501	7.62141	0	Inf	0.0029114	0.013807	-	-
Novel00503	10.2189	0.326458	4.9682	0.001655	0.0086088	-	-
Novel00504	44.8018	13.3747	1.7441	0.00080715	0.0046298	-	-
Novel00505	46.2097	92.0068	-0.99354	0.0056473	0.024084	-	-
Novel00510	28.6727	106.469	-1.8927	8.24e-05	0.0006212	-	-
Novel00513	49.7458	670.269	-3.7521	1.57e-28	2.32e-26	-	-
Novel00519	2.04448	16.5119	-3.0137	0.0046521	0.020548	-	-
Novel00524	1088.29	410.134	1.4079	0.00028725	0.0018741	-	-
Novel00530	1989.14	1322.3	0.58909	0.0063536	0.026583	-	-
Novel00545	80.1586	286.636	-1.8383	0.0072223	0.029482	-	-
Novel00548	85.8178	37.084	1.2105	0.001618	0.0084397	-	-
Novel00549	36.0026	87.3987	-1.2795	0.00025709	0.0017043	-	-
Novel00551	416.653	3686.78	-3.1454	0.0019924	0.010048	-	-
Novel00553	20.225	179.115	-3.1467	1.76e-07	2.4e-06	-	-
Novel00554	651.727	305.555	1.0928	2.05e-06	2.26e-05	-	-
Novel00556	168.239	73.2421	1.1998	0.00020659	0.0014098	-	-
Novel00564	2.668	17.8096	-2.7388	0.0065348	0.027217	-	-
Novel00577	17.9473	0.326458	5.7807	6.83e-06	6.72e-05	-	-
Novel00578	44.555	5.49023	3.0206	4.69e-07	5.86e-06	-	-
Novel00579	16.0673	2.14916	2.9023	0.0010153	0.0056613	-	-
Novel00581	151.978	26.1382	2.5396	2.85e-13	9.03e-12	-	-
Novel00582	57.8914	465.254	-3.0066	1.45e-09	2.8e-08	-	-
Novel00583	311.27	188.018	0.7273	0.0049548	0.021642	-	-
Novel00586	28.6175	2.87856	3.3135	8.75e-06	8.38e-05	-	-
Novel00588	701.791	239.004	1.554	2.21e-07	2.98e-06	-	-
Novel00594	172.659	3932.95	-4.5096	4.36e-11	1.04e-09	-	-
Novel00598	6.46372	0	Inf	0.0074205	0.03016	-	-
Novel00599	62.7108	28.7127	1.127	0.0044335	0.01974	-	-
Novel00600	432.873	675.1	-0.64116	0.0047395	0.020846	-	-
Novel00601	200.797	87.6432	1.196	3.57e-05	0.00029422	-	-
Novel00603	85.0472	515.005	-2.5983	6.61e-22	5.35e-20	-	-
Novel00609	113.244	27.6918	2.0319	1.8e-08	2.91e-07	-	-
Novel00610	314.183	130.463	1.268	4.38e-06	4.49e-05	-	-
Novel00611	24.4939	3.77926	2.6962	0.00039522	0.0024806	-	-
Novel00616	396.693	20.0147	4.3089	2.58e-35	6.59e-33	-	-
Novel00620	64.5061	19.9008	1.6966	6.03e-05	0.0004702	-	-
Novel00621	25.668	53.3886	-1.0566	0.010277	0.039663	-	-
Novel00624	124.468	257.641	-1.0496	0.0004759	0.0029184	-	-
Novel00626	10.4087	0.652917	3.9948	0.0042455	0.019047	-	-
Novel00628	145.521	40.0046	1.863	4.57e-08	6.98e-07	-	-
Novel00635	228.745	130.391	0.8109	0.003629	0.016667	-	-
Novel00636	79.6602	40.7493	0.96708	0.0066529	0.027599	-	-
Novel00647	17.1522	93.6631	-2.4491	1.1e-09	2.15e-08	-	-
Novel00648	21.6548	115.926	-2.4204	0.0024839	0.012036	-	-
Novel00649	377.997	1245.84	-1.7207	4.2e-13	1.3e-11	-	-
Novel00651	16.7549	0.346127	5.5971	0.0024584	0.011937	-	-
Novel00653	165.336	87.7571	0.91381	0.0015727	0.0082366	-	-
Novel00655	8.04631	0	Inf	0.0021755	0.010802	-	-
Novel00656	31.1457	0.652917	5.576	1.39e-07	1.94e-06	-	-
Novel00657	46.0793	13.1184	1.8125	0.0016983	0.0087903	-	-
Novel00663	6265.4	3396.53	0.88334	2.43e-05	0.0002079	-	-
Novel00669	76.4404	35.4626	1.108	0.010397	0.040044	-	-
Novel00672	128.427	872.463	-2.7642	7.97e-23	7.07e-21	-	-
Novel00673	35.7171	240.123	-2.7491	4.22e-19	2.61e-17	-	-
Novel00674	48.8596	1594.85	-5.0286	7.96e-10	1.6e-08	-	-
Novel00691	13.551	1.71097	2.9855	0.0047992	0.021076	-	-
Novel00693	2478.88	1674.62	0.56586	0.010883	0.041543	-	-
Novel00699	534.719	954.564	-0.83606	0.00018107	0.0012538	-	-
Novel00701	325.463	133.877	1.2816	2.11e-06	2.32e-05	-	-
Novel00705	14.3043	54.4617	-1.9288	3.47e-05	0.00028734	-	-
Novel00707	780.083	1411.67	-0.8557	0.00016436	0.0011519	-	-
Novel00713	148.637	27.1968	2.4503	1.98e-12	5.68e-11	-	-
Novel00719	85.8847	43.1501	0.99304	0.0077872	0.03138	-	-
Novel00720	403.4	239.13	0.75442	0.002006	0.010105	-	-
Novel00721	296.195	169.263	0.80727	0.0017169	0.0088739	-	-
Novel00723	40.6264	4.99058	3.0251	2.11e-07	2.85e-06	-	-
Novel00724	8.17616	0.326458	4.6465	0.0071254	0.029153	-	-
Novel00725	2.33596	15.8328	-2.7608	0.0019966	0.010068	-	-
Novel00726	462.751	1400.23	-1.5974	5.87e-08	8.79e-07	-	-
Novel00729	138.803	295.416	-1.0897	3.57e-05	0.00029422	-	-
Novel00741	1498.19	7453.98	-2.3148	2.13e-05	0.00018568	-	-
Novel00743	52.7969	18.2781	1.5303	0.00083107	0.0047516	-	-
Novel00747	167.755	52.3043	1.6814	1.13e-05	0.00010432	-	-
Novel00748	67.3493	13.7779	2.2893	2.56e-07	3.4e-06	-	-
Novel00749	20.7457	2.23685	3.2133	0.00015031	0.0010658	-	-
Novel00753	508.021	747.964	-0.55808	0.012606	0.046722	-	-
Novel00755	593.329	1054.18	-0.82921	0.00020754	0.0014142	-	-
Novel00761	37.5552	11.2985	1.7329	0.0030282	0.01428	-	-
Novel00765	20.8527	0	Inf	1.08e-07	1.55e-06	-	-
Novel00770	234.966	456.597	-0.95847	5.55e-05	0.00043654	-	-
Novel00777	82.8741	144.063	-0.79771	0.0052651	0.022745	-	-
Novel00783	1854.85	4238.19	-1.1921	0.0010053	0.0056109	-	-
Novel00788	931.972	579.272	0.68604	0.0019986	0.010076	-	-
Novel00789	11.9784	1.23781	3.2746	0.0052442	0.022676	-	-
Novel00793	113.372	203.408	-0.84332	0.0017333	0.0089456	-	-
Novel00797	360.768	150.742	1.259	3.45e-06	3.63e-05	-	-
Novel00799	29.4801	124.055	-2.0732	3.51e-09	6.31e-08	-	-
Novel00804	168.278	77.8246	1.1125	0.00034212	0.0021863	-	-
Novel00807	1379.38	788.704	0.80647	0.00031183	0.0020116	-	-
Novel00809	113.866	698.034	-2.616	0.00020145	0.0013784	-	-
Novel00812	127.926	66.342	0.94732	0.0046802	0.020653	-	-
Novel00814	7.50391	34.1265	-2.1852	0.00016367	0.0011476	-	-
Novel00815	165.336	609.841	-1.883	1.41e-13	4.65e-12	-	-
Novel00816	113.518	212.857	-0.90696	0.00082573	0.0047258	-	-
Novel00820	221.49	12.8687	4.1053	2.92e-16	1.33e-14	-	-
Novel00821	45.4693	12.6909	1.8411	0.0011784	0.0064485	-	-
Novel00824	883.08	1575.52	-0.83521	0.0019819	0.010011	-	-
Novel00827	63.0204	27.1681	1.2139	0.0037769	0.017215	-	-
Novel00836	0	5.45089	#NAME?	0.0080384	0.032241	-	-
Novel00837	214.682	7.89782	4.7646	1.91e-33	4.03e-31	-	-
Novel00838	34.081	1.03838	5.0366	2.81e-09	5.13e-08	-	-
Novel00839	6.49193	39.3266	-2.5988	0.001248	0.0067758	-	-
Novel00840	181.773	378.908	-1.0597	3.3e-05	0.00027442	-	-
Novel00843	391.341	798.856	-1.0295	1.87e-05	0.00016447	-	-
Novel00845	722.835	349.578	1.0481	0.00085224	0.004856	-	-
Novel00847	36.3341	10.9826	1.7261	0.0021524	0.01071	-	-
Novel00854	106.634	45.9555	1.2144	0.00058819	0.0035097	-	-
Novel00856	10.3905	33.2282	-1.6771	0.0017876	0.0091707	-	-
Novel00871	13.5104	243.812	-4.1736	5.47e-09	9.56e-08	-	-
Novel00883	88.7166	173.021	-0.96367	0.0011342	0.0062368	-	-
Novel00888	67.6613	125.838	-0.89516	0.0068179	0.028123	-	-
Novel00891	13.243	2.01776	2.7144	0.0095067	0.037141	-	-
Novel00892	154.01	92.3731	0.73748	0.012008	0.044946	-	-
Novel00894	320.653	507.886	-0.66349	0.0093112	0.036509	-	-
Novel00896	1146.46	341.099	1.7489	0.00030308	0.0019628	-	-
Novel00908	556.514	343.664	0.69542	0.0036274	0.016661	-	-
Novel00912	287.924	530.741	-0.88232	0.00022077	0.001494	-	-
Novel00918	816.742	514.063	0.66794	0.0026294	0.012637	-	-
Novel00919	34.8438	9.98142	1.8036	0.0023873	0.01167	-	-
Novel00922	30.1095	95.5197	-1.6656	6.11e-06	6.1e-05	-	-
Novel00924	49.0993	17.7416	1.4686	0.0024698	0.011982	-	-
Novel00925	1177.93	619.068	0.92808	5.25e-05	0.00041528	-	-
Novel00929	89.3337	160.494	-0.84525	0.0041275	0.018589	-	-
Novel00935	18.4268	1.36484	3.755	0.00015163	0.0010733	-	-
Novel00937	25.8002	62.3283	-1.2725	0.0016897	0.0087523	-	-
Novel00938	200.896	22.2715	3.1732	7.61e-20	5.07e-18	-	-
Novel00939	153.991	254.039	-0.72221	0.0088849	0.03509	-	-
Novel00940	159.097	341.343	-1.1013	3.59e-05	0.00029507	-	-
Novel00943	82.3494	143.777	-0.804	0.0066185	0.027492	-	-
Novel00947	37.1909	110.423	-1.57	9.73e-06	9.19e-05	-	-
Novel00948	148.07	487.497	-1.7191	3.64e-07	4.67e-06	-	-
Novel00951	49.1251	10.047	2.2897	4.36e-06	4.47e-05	-	-
Novel00952	100.137	32.3054	1.6321	4.37e-06	4.48e-05	-	-
Novel00959	607.814	234.004	1.3771	5.57e-08	8.37e-07	-	-
Novel00963	2395.96	5277.25	-1.1392	1.09e-07	1.56e-06	-	-
Novel00964	457.951	1114	-1.2825	2.64e-07	3.49e-06	-	-
Novel00966	11.5241	49.6202	-2.1063	8.16e-05	0.00061567	-	-
Novel00969	73.4338	170.489	-1.2152	5.47e-05	0.00043126	-	-
Novel00970	28.0063	59.9817	-1.0988	0.0076582	0.030949	-	-
Novel00971	5.9413	26.5567	-2.1602	0.0011622	0.0063723	-	-
Novel00975	39.1379	6.58134	2.5721	1.21e-05	0.00011134	-	-
Novel00979	30.5304	149.481	-2.2916	3.03e-05	0.00025385	-	-
Novel00981	90.981	359.168	-1.981	1.22e-13	4.06e-12	-	-
Novel00983	19.1114	4.68843	2.0273	0.012762	0.047203	-	-
Novel00988	6.69467	0	Inf	0.0060215	0.025362	-	-
Novel00991	79.3617	10.1213	2.971	1.18e-10	2.66e-09	-	-
Novel01001	227.07	107.029	1.0851	0.00013662	0.00097673	-	-
Novel01002	231.9	603.337	-1.3795	0.00011112	0.00081316	-	-
Novel01004	47.0983	9.49078	2.3111	1.1e-05	0.00010155	-	-
Novel01005	94.1824	7.92432	3.5711	1.87e-14	6.9e-13	-	-
Novel01006	29.6323	5.51209	2.4265	0.00018435	0.0012746	-	-
Novel01007	272.253	1135.72	-2.0606	4.38e-07	5.52e-06	-	-
Novel01009	15.6259	2.93812	2.411	0.010012	0.038816	-	-
Novel01018	263.851	16.7335	3.9789	4.99e-22	4.06e-20	-	-
Novel01019	169.455	45.279	1.904	3.4e-09	6.13e-08	-	-
Novel01028	22.4764	101.143	-2.1699	9.06e-09	1.53e-07	-	-
Novel01029	293.291	74.3144	1.9806	6.08e-12	1.64e-10	-	-
Novel01041	6.16812	41.6339	-2.7549	1.27e-06	1.45e-05	-	-
Novel01047	34.4389	0.326458	6.721	2.6e-08	4.12e-07	-	-
Novel01048	1018.95	1905.15	-0.90282	0.0010382	0.0057702	-	-
Novel01051	74.105	3.01899	4.6174	2.87e-16	1.31e-14	-	-
Novel01054	3642.25	17803.8	-2.2893	3.05e-15	1.22e-13	-	-
Novel01055	42.2935	0.911351	5.5363	2.57e-12	7.27e-11	-	-
Novel01064	285.761	1287.95	-2.1722	4.85e-06	4.93e-05	-	-
Novel01067	1020.23	557.22	0.87258	0.00028353	0.0018548	-	-
Novel01069	888.318	1368	-0.62292	0.0062514	0.026218	-	-
Novel01073	34.1527	72.5941	-1.0879	0.0058605	0.02481	-	-
Novel01075	5.07273	27.2105	-2.4233	0.0020593	0.010336	-	-
Novel01076	90.2934	45.3875	0.99232	0.0074464	0.030257	-	-
Novel01085	373.052	897.257	-1.2661	6.16e-08	9.18e-07	-	-
Novel01086	691.79	216.042	1.679	9.82e-08	1.42e-06	-	-
Novel01088	65.5591	31.65	1.0506	0.0098876	0.038428	-	-
Novel01094	55.238	9.21431	2.5837	1.92e-07	2.61e-06	-	-
Novel01099	561.901	1734.89	-1.6265	3.99e-08	6.18e-07	-	-
Novel01102	1612.1	2403.05	-0.57593	0.011474	0.043339	-	-
Novel01109	237.455	124.823	0.92777	0.0022521	0.011112	-	-
Novel01110	189.258	362.653	-0.93823	0.0003139	0.0020226	-	-
Novel01113	1045.08	1710.12	-0.71048	0.0013275	0.0071387	-	-
Novel01115	146.72	34.5029	2.0883	0.0019296	0.0098033	-	-
Novel01116	34.1615	2.58298	3.7253	4.05e-05	0.00032916	-	-
Novel01120	2.33009	42.6466	-4.194	1.22e-10	2.77e-09	-	-
Novel01122	480.339	206.69	1.2166	1.04e-06	1.21e-05	-	-
Novel01129	543.63	813.675	-0.58183	0.013661	0.04992	-	-
Novel01135	11.9255	38.0238	-1.6729	0.0016135	0.0084191	-	-
Novel01138	1389.76	4627.8	-1.7355	8.84e-15	3.35e-13	-	-
Novel01143	466.572	267.841	0.80073	0.0014786	0.0078178	-	-
Novel01153	41.4708	80.5627	-0.95802	0.010684	0.040938	-	-
Novel01159	109.863	57.7069	0.92889	0.007736	0.031201	-	-
Novel01160	28.6217	0	Inf	0.00027408	0.0018021	-	-
Novel01166	122.139	193.381	-0.66292	0.012633	0.046805	-	-
Novel01170	311.051	53.0225	2.5525	1.67e-17	8.77e-16	-	-
Novel01171	350.623	118.509	1.5649	5.18e-09	9.1e-08	-	-
Novel01173	13.2506	41.6077	-1.6508	0.00074934	0.0043387	-	-
Novel01174	17.5271	3.73091	2.232	0.0059277	0.025042	-	-
Novel01176	1006.95	523.894	0.94264	0.0038664	0.017563	-	-
Novel01177	53.938	12.4283	2.1177	0.0031687	0.014824	-	-
Novel01179	3749.33	2148.4	0.80337	0.00047556	0.0029169	-	-
Novel01181	19.8918	0.346127	5.8447	1.49e-06	1.69e-05	-	-
Novel01184	203.932	38.9569	2.3881	1.84e-05	0.00016232	-	-
Novel01187	385.232	1318.98	-1.7756	1.57e-14	5.88e-13	-	-
Novel01188	145.917	341.734	-1.2277	2.15e-06	2.35e-05	-	-
Novel01189	16.4599	44.8062	-1.4447	0.0032154	0.014998	-	-
Novel01192	249.212	789.931	-1.6644	3.84e-12	1.07e-10	-	-
Novel01193	443.861	217.788	1.0272	4.15e-05	0.00033662	-	-
Novel01199	342.607	122.545	1.4832	3.95e-08	6.12e-07	-	-
Novel01201	240.825	486.506	-1.0145	2.91e-05	0.000245	-	-
Novel01202	123.581	32.9545	1.9069	6.61e-08	9.82e-07	-	-
Novel01204	30.2964	2.4931	3.6031	1.52e-06	1.71e-05	-	-
Novel01206	39.3442	4.87884	3.0115	9.14e-07	1.08e-05	-	-
Novel01207	82.8319	16.5999	2.319	3.25e-07	4.22e-06	-	-
Novel01209	849.892	482.153	0.81779	0.00023304	0.0015691	-	-
Novel01219	5431.37	8294.61	-0.61086	0.0063896	0.026718	-	-
Novel01229	5.81199	49.4525	-3.0889	2.24e-08	3.58e-07	-	-
Novel01235	396.716	5028.6	-3.664	5.41e-52	3.4e-49	-	-
Novel01237	70.036	258.304	-1.8829	0.00054613	0.0032927	-	-
Novel01239	160.903	53.1424	1.5983	3.73e-07	4.78e-06	-	-
Novel01258	52.2128	9.20147	2.5045	1.68e-06	1.88e-05	-	-
Novel01277	48.2425	18.5125	1.3818	0.00384	0.017466	-	-
Novel01284	123.087	199.537	-0.69698	0.013111	0.048239	-	-
Novel01295	336.732	1609.89	-2.2573	0.00035916	0.002281	-	-
Novel01298	30.6708	7.7096	1.9921	0.0010465	0.0058104	-	-
Novel01299	250.715	515.253	-1.0392	1.71e-05	0.00015219	-	-
Novel01309	27.2453	9.22333	1.5626	0.010113	0.03916	-	-
Novel01311	409.777	207.136	0.98426	0.00012619	0.00091025	-	-
Novel01312	14.2632	0	Inf	4.58e-05	0.00036735	-	-
Novel01321	370.3	736.138	-0.99128	0.0051463	0.022307	-	-
Novel01329	144.463	65.341	1.1446	0.0018097	0.009267	-	-
Novel01333	19.1942	1454.85	-6.2441	6.66e-10	1.36e-08	-	-
Novel01336	1089.31	267.681	2.0248	4.32e-16	1.94e-14	-	-
Novel01337	10.4252	35.0307	-1.7485	0.0011784	0.0064485	-	-
Novel01339	5.81786	0	Inf	0.012226	0.045601	-	-
Novel01340	61.6614	0.326458	7.5613	3.62e-07	4.65e-06	-	-
Novel01341	2.89894	14.9236	-2.364	0.007887	0.031706	-	-
Novel01345	21.2006	4.36197	2.2811	0.0039307	0.017822	-	-
Novel01351	899.283	492.862	0.86759	0.00039475	0.0024782	-	-
Novel01354	188.409	325.891	-0.79052	0.0021028	0.010524	-	-
Novel01357	1.99805	43.2684	-4.4367	6.53e-11	1.53e-09	-	-
Novel01358	2479.13	5068.29	-1.0317	0.011025	0.041962	-	-
Novel01368	131.262	361.388	-1.4611	0.00054833	0.0033032	-	-
Novel01369	1049.07	233.755	2.166	7.48e-05	0.00057019	-	-
Novel01372	299.456	155.315	0.94715	0.00021775	0.0014771	-	-
Novel01373	1708.66	658.219	1.3762	2.13e-09	3.98e-08	-	-
Novel01374	1750.12	537.912	1.702	3.55e-10	7.47e-09	-	-
Novel01375	54.6304	20.2322	1.4331	0.00090231	0.0051025	-	-
Novel01387	9.76523	35.2831	-1.8533	0.00047073	0.0028891	-	-
Novel01393	85.089	32.7769	1.3763	0.00024118	0.0016139	-	-
Novel01396	118.048	256.687	-1.1206	0.00012921	0.00092804	-	-
Novel01399	195.718	96.4567	1.0208	0.00026489	0.0017478	-	-
Novel01401	41.7058	15.5593	1.4225	0.011057	0.042067	-	-
Novel01403	18.0853	4.69908	1.9444	0.013101	0.04821	-	-
Novel01404	133.687	16.3019	3.0357	2.42e-10	5.2e-09	-	-
Novel01406	270.134	512.604	-0.92417	0.00021864	0.001482	-	-
Novel01407	131.147	371.252	-1.5012	1.61e-08	2.63e-07	-	-
Novel01410	7.116	119.848	-4.074	9.81e-21	7.2e-19	-	-
Novel01414	5.74322	41.4826	-2.8526	8.68e-06	8.33e-05	-	-
Novel01416	1594.72	384.149	2.0536	2.88e-18	1.65e-16	-	-
Novel01422	61.4126	2.40322	4.6755	6.68e-14	2.31e-12	-	-
Novel01425	456.81	179.515	1.3475	3.99e-08	6.18e-07	-	-
Novel01428	191.042	1885.56	-3.303	2.42e-40	8.89e-38	-	-
Novel01434	18.0677	0.911351	4.3093	6.53e-05	0.00050573	-	-
Novel01436	67.3898	489.386	-2.8604	2.82e-25	3.12e-23	-	-
Novel01437	37.5993	279.376	-2.8934	0.0061219	0.025747	-	-
Novel01440	86.2467	35.9401	1.2629	0.0013467	0.0072202	-	-
Novel01451	371.513	219.675	0.75804	0.0022828	0.011245	-	-
Novel01456	28.5298	77.2495	-1.4371	0.0002771	0.0018174	-	-
Novel01457	288.414	44.802	2.6865	3.36e-15	1.34e-13	-	-
Novel01463	29.8874	107.784	-1.8505	0.00023924	0.0016025	-	-
Novel01464	548.409	163.296	1.7478	6.48e-12	1.74e-10	-	-
Novel01469	24.1894	71.891	-1.5714	0.0057961	0.02457	-	-
Novel01481	1046.2	2959.64	-1.5003	0.0016595	0.0086277	-	-
Novel01482	249.952	1359.06	-2.4429	9.16e-06	8.72e-05	-	-
Novel01489	32.1088	5.37604	2.5784	0.0013949	0.0074432	-	-
Novel01491	93.287	294.93	-1.6606	9.38e-10	1.86e-08	-	-
Novel01492	763.831	1158.72	-0.60121	0.0061851	0.025967	-	-
Novel01495	527.468	328.82	0.68178	0.0055375	0.023701	-	-
Novel01498	122.226	13.7582	3.1512	1.66e-15	6.95e-14	-	-
Novel01501	914.746	1766.68	-0.9496	2.52e-05	0.00021482	-	-
Novel01505	56.2611	521.799	-3.2133	2.11e-10	4.59e-09	-	-
Novel01517	486.613	715.101	-0.55537	0.011938	0.044744	-	-
Novel01525	383.312	236	0.69973	0.0057386	0.024396	-	-
Novel01526	165.458	10.2792	4.0087	1.13e-23	1.09e-21	-	-
Novel01534	2.58512	24.9359	-3.2699	1.47e-05	0.00013224	-	-
Novel01535	11.8426	43.7153	-1.8842	0.00015989	0.001123	-	-
Novel01538	10.8947	0	Inf	0.00022053	0.0014927	-	-
Novel01541	75.3797	155.586	-1.0455	0.00056105	0.0033692	-	-
Novel01543	5165.95	16811.3	-1.7023	2.2e-14	8.05e-13	-	-
Novel01544	23.1909	2.05709	3.4949	3.76e-05	0.00030778	-	-
Novel01545	3.7775	21.5397	-2.5115	0.0053052	0.022876	-	-
Novel01546	3.68464	31.5282	-3.097	0.001618	0.0084397	-	-
Novel01547	254.945	91.5	1.4783	0.0051053	0.022166	-	-
Novel01548	37.6699	13.5544	1.4746	0.0062812	0.026323	-	-
Novel01549	123.711	44.0967	1.4882	0.0031031	0.014573	-	-
Novel01551	697.519	376.593	0.88922	0.010195	0.03941	-	-
Novel01559	299.299	19.1804	3.9639	1.41e-32	2.76e-30	-	-
Novel01563	580.853	934.596	-0.68617	0.0025938	0.012498	-	-
Novel01571	1488.43	605.663	1.2972	5.96e-09	1.04e-07	-	-
Novel01577	68.8831	7.39161	3.2202	6.16e-07	7.5e-06	-	-
Novel01578	217.285	78.9569	1.4605	1.81e-06	2.01e-05	-	-
Novel01587	11.9249	0.692254	4.1065	0.0015706	0.0082287	-	-
Novel01589	3435.56	5393.89	-0.65078	0.0029028	0.013774	-	-
Novel01591	31.3531	5.55361	2.4971	5.52e-05	0.00043457	-	-
Novel01601	25.7696	105.577	-2.0345	4.58e-08	6.99e-07	-	-
Novel01608	45.4065	1.65196	4.7806	2.99e-07	3.9e-06	-	-
Novel01633	50.5373	227.106	-2.1679	7.07e-13	2.14e-11	-	-
Novel01641	162.84	28.103	2.5347	3.21e-08	5.02e-07	-	-
Novel01642	77.3742	23.6959	1.7072	0.0019271	0.0097941	-	-
Novel01643	223.781	37.0832	2.5933	1.2e-07	1.69e-06	-	-
Novel01644	644.236	411.993	0.64497	0.0046043	0.020369	-	-
Novel01645	47.3575	9.11159	2.3778	1.04e-05	9.71e-05	-	-
Novel01649	197.975	92.9638	1.0906	0.009371	0.036707	-	-
Novel01659	83.7796	280.179	-1.7417	0.00011764	0.00085558	-	-
Novel01660	18.5754	55.1249	-1.5693	0.00034893	0.0022236	-	-
Novel01680	492.734	117.692	2.0658	6.43e-16	2.82e-14	-	-
Novel01686	265.677	776.62	-1.5475	0.00047655	0.0029217	-	-
Novel01687	1789.67	3527.42	-0.97892	0.0026156	0.012582	-	-
Novel01691	66.5554	14.7157	2.1772	1.34e-06	1.53e-05	-	-
Novel01696	75.3114	278.336	-1.8859	2.3e-05	0.00019817	-	-
Novel01697	25.4294	2.38574	3.414	1.13e-05	0.00010423	-	-
Novel01698	31.283	3.34326	3.2261	0.00072861	0.0042281	-	-
Novel01703	733.565	1620.58	-1.1435	5.64e-07	6.94e-06	-	-
Novel01705	254.391	570.615	-1.1655	1.02e-06	1.2e-05	-	-
Novel01707	59.9382	13.918	2.1065	1.11e-05	0.00010277	-	-
Novel01712	203.357	70.6485	1.5253	1.48e-06	1.67e-05	-	-
Novel01713	116.602	304.026	-1.3826	3.06e-07	3.99e-06	-	-
Novel01715	89.5064	300.777	-1.7486	1.84e-10	4.05e-09	-	-
Novel01720	24.0249	4.99522	2.2659	0.0023448	0.011498	-	-
Novel01724	53.7301	21.8025	1.3012	0.0049965	0.021794	-	-
Novel01725	270.616	2222.61	-3.0379	1.33e-36	3.73e-34	-	-
Novel01729	97.494	23.2116	2.0705	1.54e-07	2.13e-06	-	-
Novel01730	119.412	325.172	-1.4453	7.09e-08	1.05e-06	-	-
Novel01731	1216.29	449.383	1.4365	1.24e-09	2.42e-08	-	-
Novel01732	12.3057	92.5753	-2.9113	2.34e-11	5.81e-10	-	-
Novel01735	31.9237	71.8844	-1.1711	0.0034435	0.015923	-	-
Novel01739	188.442	340.473	-0.85342	0.0013408	0.0071939	-	-
Novel01742	805.084	312.754	1.3641	2.55e-09	4.7e-08	-	-
Novel01744	0.29148	51.9765	-7.4783	2.33e-17	1.21e-15	-	-
Novel01747	22.6932	0.652917	5.1192	1.05e-06	1.22e-05	-	-
Novel01753	42.9859	82.9632	-0.94861	0.0087842	0.03477	-	-
Novel01757	23.65	0.652917	5.1788	6.23e-07	7.58e-06	-	-
Novel01758	36.3011	303.162	-3.062	0.013358	0.048983	-	-
Novel01759	81.9633	38.407	1.0936	0.0030396	0.01432	-	-
Novel01765	16.4799	750.702	-5.5095	6.46e-20	4.36e-18	-	-
Novel01770	217.923	21.6408	3.332	0.0015986	0.0083538	-	-
Novel01772	284.49	788.517	-1.4708	8.12e-10	1.63e-08	-	-
Novel01773	131.777	9.83691	3.7437	2.56e-19	1.62e-17	-	-
Novel01779	573.193	222.658	1.3642	8.02e-08	1.17e-06	-	-
Novel01780	109.574	307.21	-1.4873	4.21e-08	6.48e-07	-	-
Novel01782	344.237	101.172	1.7666	2.15e-10	4.68e-09	-	-
Novel01784	11.6498	37.6623	-1.6928	0.0039073	0.017732	-	-
Novel01803	679.557	377.113	0.8496	0.00044068	0.0027248	-	-
Novel01807	630.806	248.357	1.3448	3.53e-06	3.7e-05	-	-
Novel01809	12.1058	1.23781	3.2898	0.0026511	0.012733	-	-
Novel01810	10.2653	1.10859	3.211	0.0090847	0.035734	-	-
Novel01812	2.07093	21.3143	-3.3635	0.0064862	0.027054	-	-
Novel01813	11.6616	98.6559	-3.0806	8.16e-14	2.78e-12	-	-
Novel01818	125.679	213.491	-0.76444	0.005461	0.02342	-	-
Novel01822	385.656	209.96	0.8772	0.001162	0.0063721	-	-
Novel01823	531.225	269.175	0.98078	0.0012522	0.0067948	-	-
Novel01831	44.9052	82.7247	-0.88144	0.01154	0.043554	-	-
Novel01840	14.3278	3.03866	2.2373	0.012148	0.04538	-	-
Novel01841	14.2391	41.3077	-1.5365	0.0022094	0.010938	-	-
Novel01842	33.1584	0	Inf	8.57e-07	1.02e-05	-	-
Novel01845	94.6969	165.246	-0.80323	0.0066908	0.0277	-	-
Novel01846	31.2432	3.96968	2.9764	7.46e-06	7.26e-05	-	-
Novel01849	18.5349	0.692254	4.7428	1.81e-05	0.00015956	-	-
Novel01852	78.4378	309.875	-1.9821	1.05e-08	1.75e-07	-	-
Novel01860	46.4338	93.517	-1.0101	0.0040989	0.018489	-	-
Novel01861	43.285	290.916	-2.7487	1.21e-10	2.73e-09	-	-
Novel01862	6.37443	27.2009	-2.0933	0.00066159	0.0038935	-	-
Novel01863	3.82393	21.2881	-2.4769	0.00097591	0.0054715	-	-
Novel01864	252.593	42.2628	2.5794	1.1e-16	5.24e-15	-	-
Novel01865	114.879	41.8948	1.4553	3.78e-05	0.00030898	-	-
Novel01866	17.9784	2.40322	2.9032	0.0012324	0.0066984	-	-
Novel01869	263.837	102.49	1.3642	1.58e-06	1.77e-05	-	-
Novel01873	148.734	680.144	-2.1931	0.0022656	0.011175	-	-
Novel01875	238.468	703.117	-1.56	5.84e-07	7.15e-06	-	-
Novel01889	94.2125	36.1855	1.3805	0.00019494	0.0013393	-	-
Novel01893	25.4581	5.59076	2.187	0.0012188	0.0066402	-	-
Novel01894	1896.83	959.5	0.98324	0.009796	0.03814	-	-
Novel01898	1782.07	1218.79	0.5481	0.011019	0.041951	-	-
Novel01899	84.291	25.9107	1.7018	1.03e-05	9.64e-05	-	-
Novel01908	1335.8	755.109	0.82295	0.000115	0.0008383	-	-
Novel01910	71.8662	14.1349	2.346	0.0023249	0.011422	-	-
Novel01918	10.8988	76.1453	-2.8046	0.0032016	0.014951	-	-
Novel01923	73.8993	150.266	-1.0239	0.0014692	0.0077794	-	-
Novel01932	73.0983	32.6999	1.1606	0.0021337	0.010641	-	-
Novel01935	287.109	66.7228	2.1053	5.2e-13	1.6e-11	-	-
Novel01936	16.4886	1.10859	3.8947	0.0001762	0.0012237	-	-
Novel01941	17.3055	3.96749	2.1249	0.0098093	0.038171	-	-
Novel01943	36.8594	1798.49	-5.6086	1.67e-18	9.89e-17	-	-
Novel01952	163.283	57.638	1.5023	0.003062	0.014404	-	-
Novel01953	1616.74	8766.92	-2.439	1.37e-09	2.66e-08	-	-
Novel01954	26.848	7.47084	1.8455	0.0047548	0.020905	-	-
Novel01957	24.5838	0.346127	6.1503	6.13e-08	9.16e-07	-	-
Novel01958	155.9	917.686	-2.5574	8.59e-25	9.18e-23	-	-
Novel01962	66.151	23.8817	1.4699	0.00029757	0.0019342	-	-
Novel01963	50.2347	18.6289	1.4311	0.0076169	0.030808	-	-
Novel01965	68.9795	17.7719	1.9566	7.54e-06	7.33e-05	-	-
Novel01972	28.5634	1.23781	4.5283	5.05e-07	6.28e-06	-	-
Novel01973	182.62	41.3031	2.1445	3.9e-11	9.35e-10	-	-
Novel01974	241.02	128.302	0.90961	0.0010036	0.0056055	-	-
Novel01975	24.8094	55.7369	-1.1677	0.0036268	0.016661	-	-
Novel01983	0	6.6032	#NAME?	0.0056378	0.024061	-	-
Novel01986	62.0391	294.82	-2.2486	1.8e-15	7.49e-14	-	-
Novel01987	30.7847	141.134	-2.1968	3.14e-10	6.66e-09	-	-
Novel01989	50.0837	14.2079	1.8176	0.00031108	0.0020081	-	-
Novel01991	40.8668	186.349	-2.189	7.64e-09	1.31e-07	-	-
Novel01995	53.4755	19.5025	1.4552	0.0014869	0.0078545	-	-
Novel01996	127.51	772.159	-2.5983	4.84e-25	5.29e-23	-	-
Novel02000	73.5744	12.4917	2.5582	1.72e-06	1.92e-05	-	-
Novel02002	41.5432	141.993	-1.7731	9e-06	8.58e-05	-	-
Novel02009	37.2373	168.33	-2.1765	2.04e-11	5.12e-10	-	-
Novel02010	65.2676	469.993	-2.8482	4.88e-25	5.31e-23	-	-
Novel02012	59.9241	136.322	-1.1858	0.00016003	0.0011238	-	-
Novel02014	2215.8	4903.31	-1.1459	2.02e-07	2.73e-06	-	-
Novel02015	77.3378	37.281	1.0527	0.0044649	0.019842	-	-
Novel02016	239.368	90.3242	1.406	9.55e-07	1.13e-05	-	-
Novel02017	154.876	4350.47	-4.812	6.75e-78	3.82e-74	-	-
Novel02023	48.3507	7.99617	2.5962	9.36e-07	1.11e-05	-	-
Novel02028	195.831	71.2009	1.4596	4.23e-07	5.35e-06	-	-
Novel02032	10.4398	30.0205	-1.5238	0.0066378	0.027548	-	-
Novel02033	65.3799	21.299	1.6181	0.00026088	0.0017262	-	-
Novel02039	119.974	36.006	1.7364	4.45e-07	5.59e-06	-	-
Novel02046	15.6971	154.147	-3.2957	3.7e-19	2.31e-17	-	-
Novel02050	973.134	614.119	0.66412	0.0064086	0.026786	-	-
Novel02051	9.2287	0	Inf	0.0008511	0.0048515	-	-
Novel02052	91.9201	200.046	-1.1219	0.00012508	0.00090292	-	-
Novel02056	40.9607	2.01776	4.3434	1.5e-09	2.88e-08	-	-
Novel02060	72.4424	21.4853	1.7535	1.88e-05	0.00016562	-	-
Novel02066	126.218	337.344	-1.4183	3.84e-08	5.95e-07	-	-
Novel02077	20.1316	62.8501	-1.6425	0.00011088	0.00081159	-	-
Novel02078	149.319	347.736	-1.2196	3.88e-06	4.04e-05	-	-
Novel02084	740.093	324.778	1.1883	2.31e-05	0.00019927	-	-
Novel02087	579.739	160.726	1.8508	1.29e-13	4.28e-12	-	-
Novel02089	95.117	39.3536	1.2732	0.00027082	0.001784	-	-
Novel02091	12.0689	31.7579	-1.3958	0.0096079	0.037485	-	-
Novel02092	299.461	101.173	1.5655	8.13e-08	1.19e-06	-	-
Novel02093	8.68394	0.346127	4.649	0.0057666	0.024486	-	-
Novel02096	10.9212	0	Inf	0.00021806	0.0014785	-	-
Novel02107	450.993	151.849	1.5705	1.93e-09	3.62e-08	-	-
Novel02108	22.3988	0	Inf	3.53e-08	5.5e-07	-	-
Novel02111	183.135	33.8699	2.4348	3.15e-13	9.92e-12	-	-
Novel02112	1272.56	1881.61	-0.56423	0.011962	0.044818	-	-
Novel02113	88.2153	20.5649	2.1008	0.00062161	0.0036866	-	-
Novel02114	148.651	82.6439	0.84695	0.0067461	0.027871	-	-
Novel02115	102.734	188.29	-0.87405	0.00493	0.021563	-	-
Novel02116	290.901	122.338	1.2497	0.00030064	0.0019523	-	-
Novel02122	334.896	750.7	-1.1645	3.6e-06	3.77e-05	-	-
Novel02126	1454.82	2669.77	-0.87587	6.17e-05	0.00047994	-	-
Novel02131	25.9295	1.8227	3.8304	1.2e-06	1.38e-05	-	-
Novel02140	1.4192	31.1815	-4.4575	3.05e-05	0.00025563	-	-
Novel02147	24.1524	5.73118	2.0753	0.0019092	0.009717	-	-
Novel02153	104.826	30.9468	1.7601	1.03e-06	1.21e-05	-	-
Novel02156	22.4582	81.1028	-1.8525	4.42e-06	4.52e-05	-	-
Novel02158	207.327	125.59	0.72318	0.011175	0.042406	-	-
Novel02159	1113.47	667.754	0.73768	0.00093625	0.00527	-	-
Novel02160	102.432	60.6302	0.75656	0.011858	0.044477	-	-
Novel02165	15.7976	0.672585	4.5538	0.00011031	0.00080829	-	-
Novel02167	360.285	220.744	0.70676	0.0078575	0.031614	-	-
Novel02168	18.3186	43.9522	-1.2626	0.0084377	0.033596	-	-
Novel02174	17.3808	0.326458	5.7344	1.03e-05	9.64e-05	-	-
Novel02181	627.299	362.815	0.78992	0.002783	0.013272	-	-
Novel02189	47.4051	3.91067	3.5996	1.94e-09	3.65e-08	-	-
Novel02199	318.604	190.288	0.74358	0.0038943	0.017678	-	-
Novel02202	25.8965	198.368	-2.9374	0.00012426	0.00089746	-	-
Novel02211	74.3125	186.084	-1.3243	0.00041004	0.0025588	-	-
Novel02216	67.5302	18.7187	1.851	3.55e-05	0.000293	-	-
Novel02224	6.26565	40.1221	-2.6789	0.0078396	0.031563	-	-
Novel02237	173.236	357.798	-1.0464	3.86e-05	0.00031461	-	-
Novel02242	35.9279	12.1284	1.5667	0.0099859	0.038737	-	-
Novel02253	458.214	752.557	-0.71578	0.0024589	0.011938	-	-
Novel02256	104.635	175.387	-0.74518	0.0091286	0.035887	-	-
Novel02259	237.808	108.616	1.1306	3.81e-05	0.00031097	-	-
Novel02262	262.418	140.635	0.89991	0.0017874	0.0091707	-	-
Novel02269	44.7082	5.07608	3.1388	1.08e-07	1.55e-06	-	-
Novel02272	18.6865	5.35418	1.8033	0.013383	0.049055	-	-
Novel02277	118.862	227.25	-0.93499	0.010251	0.039585	-	-
Novel02283	19.6691	0.782134	4.6524	7.34e-06	7.16e-05	-	-
Novel02284	16.1931	65.0651	-2.0065	4.16e-06	4.29e-05	-	-
Novel02288	594.231	361.214	0.71817	0.0046896	0.020682	-	-
Novel02289	91.7454	48.1784	0.92925	0.010365	0.039953	-	-
Novel02291	62.5157	13.4492	2.2167	1.26e-06	1.44e-05	-	-
Novel02292	87.2334	47.6101	0.87361	0.011927	0.044709	-	-
Novel02294	49.3366	7.67873	2.6837	1.96e-05	0.00017175	-	-
Novel02295	124.016	65.4913	0.92116	0.0023953	0.011699	-	-
Novel02296	531.353	281.995	0.914	0.0002045	0.0013969	-	-
Novel02304	171.737	9.15093	4.2301	1.83e-25	2.08e-23	-	-
Novel02305	23.4525	6.72804	1.8015	0.0086072	0.034176	-	-
Novel02306	141.323	67.1047	1.0745	0.00066108	0.0038921	-	-
Novel02309	112.982	56.1942	1.0076	0.0029269	0.013869	-	-
Novel02311	515.72	1182.95	-1.1977	0.0014095	0.0075082	-	-
Novel02312	28.5963	659.831	-4.5282	1.3e-21	1.03e-19	-	-
Novel02313	259.064	57.7041	2.1666	1.95e-12	5.6e-11	-	-
Novel02315	56.3123	114.736	-1.0268	0.0023821	0.011649	-	-
Novel02321	147.839	890.948	-2.5913	8.69e-25	9.25e-23	-	-
Novel02327	150.798	45.0209	1.744	6e-08	8.98e-07	-	-
Novel02328	741.536	155.358	2.2549	3.39e-18	1.92e-16	-	-
Novel02332	314.072	141.008	1.1553	3.11e-05	0.00025972	-	-
Novel02333	5373.09	9044.69	-0.75132	0.00070478	0.0041093	-	-
Novel02334	4.15186	23.0496	-2.4729	0.0005702	0.0034182	-	-
Novel02343	0.619404	80.8392	-7.028	2.17e-05	0.00018854	-	-
Novel02345	4.92345	456.641	-6.5352	1.01e-08	1.69e-07	-	-
Novel02346	1.1095	143.887	-7.0189	4.2e-15	1.66e-13	-	-
Novel02351	234.938	61.8574	1.9253	0.00090739	0.0051279	-	-
Novel02352	831.867	45.0253	4.2075	1.95e-50	1.15e-47	-	-
Novel02360	153.64	3.05832	5.6507	2.8e-23	2.58e-21	-	-
Novel02366	207.9	103.193	1.0106	0.00028171	0.0018446	-	-
Novel02371	364.505	59.6077	2.6124	3.03e-17	1.55e-15	-	-
Novel02373	723.239	340.826	1.0854	7e-05	0.00053837	-	-
Novel02377	265.86	1569.34	-2.5614	3.25e-26	3.94e-24	-	-
Novel02380	40.9396	81.9035	-1.0004	0.0060256	0.025376	-	-
Novel02381	21.2811	2.41443	3.1398	0.00023914	0.0016025	-	-
Novel02382	58.2609	142.05	-1.2858	5.67e-05	0.00044468	-	-
Novel02384	239.877	397.416	-0.72835	0.002488	0.012046	-	-
Novel02392	165.423	77.2954	1.0977	0.00016928	0.0011825	-	-
Novel02398	848.156	1477.2	-0.80046	0.00030074	0.0019523	-	-
Novel02401	31.393	189.564	-2.5942	6.45e-07	7.82e-06	-	-
Novel02402	29.8199	9.11159	1.7105	0.0059966	0.025276	-	-
Novel02406	1029.82	677.676	0.60373	0.0068868	0.02837	-	-
Novel02410	72.204	19.1935	1.9115	1.04e-05	9.76e-05	-	-
Novel02415	27.2794	6.84661	1.9944	0.010864	0.0415	-	-
Novel02418	1769.13	1191.56	0.57019	0.0074359	0.030219	-	-
Novel02422	665.386	64.6059	3.3645	2.64e-10	5.65e-09	-	-
Novel02425	19.9189	151.317	-2.9254	4.55e-05	0.00036511	-	-
Novel02429	51.9689	14.8253	1.8096	0.00012227	0.0008845	-	-
Novel02431	2748.51	1502.19	0.87158	4.74e-05	0.00037917	-	-
Novel02436	475.575	986.228	-1.0522	3.35e-06	3.53e-05	-	-
Novel02437	225.477	371.39	-0.71996	0.0044558	0.019805	-	-
Novel02438	8.92899	35.187	-1.9785	0.00025498	0.0016915	-	-
Novel02441	84.8456	34.7217	1.289	0.00053942	0.0032578	-	-
Novel02447	261.658	146.081	0.84091	0.0057545	0.024449	-	-
Novel02448	44.8858	1.8227	4.6221	1.36e-11	3.51e-10	-	-
Novel02450	115.584	185.571	-0.68303	0.010972	0.041822	-	-
Novel02451	44.653	5.83854	2.9351	3.69e-07	4.74e-06	-	-
Novel02454	20.9437	2.92911	2.838	0.00044176	0.0027297	-	-
Novel02455	704.772	215.376	1.7103	0.00056621	0.0033964	-	-
Novel02456	15.1418	1.34517	3.4927	0.0011701	0.0064092	-	-
Novel02472	338.869	110.261	1.6198	2.26e-09	4.22e-08	-	-
Novel02483	20.5958	1.3255	3.9577	3.54e-05	0.00029214	-	-
Novel02490	91.9429	163.832	-0.83341	0.005259	0.022726	-	-
Novel02491	119.028	25.9434	2.1979	3.3e-09	5.97e-08	-	-
Novel02495	1479.07	83.4866	4.147	1.1e-13	3.68e-12	-	-
Novel02497	57.1391	11.9686	2.2552	1.4e-06	1.6e-05	-	-
Novel02498	252.725	75.7336	1.7386	4.99e-09	8.81e-08	-	-
Novel02499	430.409	112.563	1.935	7.24e-13	2.18e-11	-	-
Novel02501	129.031	69.0678	0.90163	0.0080767	0.032363	-	-
Novel02503	20.7475	1.71097	3.6001	7.65e-05	0.00058237	-	-
Novel02504	22.0774	5.47056	2.0128	0.0071213	0.029145	-	-
Novel02505	630.77	317.07	0.99231	3.6e-05	0.0002959	-	-
Novel02506	8.17441	0.326458	4.6461	0.0071299	0.029167	-	-
Novel02507	37.0452	6.97364	2.4093	0.00010343	0.00076263	-	-
Novel02508	157.92	56.0054	1.4956	7.14e-07	8.63e-06	-	-
Novel02509	141.965	308.111	-1.1179	0.011543	0.043558	-	-
Novel02515	327.685	119.412	1.4564	1.51e-05	0.00013602	-	-
Novel02516	132.637	40.6706	1.7054	1.34e-06	1.53e-05	-	-
Novel02519	24.9499	4.86819	2.3576	0.0010834	0.005991	-	-
Novel02525	313.669	10.056	4.9631	1.41e-33	3.06e-31	-	-
Novel02531	133.954	63.1788	1.0842	0.00060545	0.0036005	-	-
Novel02532	927.215	586.631	0.66045	0.0049783	0.021725	-	-
Novel02535	38.0718	124.807	-1.7129	5.56e-07	6.86e-06	-	-
Novel02536	145.197	18.9635	2.9367	0.00066803	0.0039261	-	-
Novel02559	424.765	641.659	-0.59514	0.013293	0.048781	-	-
Novel02560	0.58296	22.3442	-5.2604	0.0037947	0.017284	-	-
Novel02565	193.608	116.374	0.73437	0.0061343	0.025788	-	-
Novel02572	49.2521	95.512	-0.9555	0.0051311	0.022264	-	-
Novel02576	283.299	134.304	1.0768	0.00010424	0.00076735	-	-
Novel02577	30.0607	3.36293	3.1601	0.0003821	0.0024084	-	-
Novel02585	22.2577	56.3084	-1.339	0.0013115	0.007058	-	-
Novel02587	317.072	202.512	0.64681	0.010587	0.040622	-	-
Novel02588	1477.3	3143.76	-1.0895	1.37e-06	1.57e-05	-	-
Novel02598	2841.68	9411.59	-1.7277	5e-15	1.96e-13	-	-
Novel02603	14.9901	100.388	-2.7435	1.31e-08	2.16e-07	-	-
Novel02607	14.7738	51.3367	-1.7969	0.00012495	0.00090222	-	-
Novel02613	1186.03	623.753	0.92709	3.76e-05	0.00030744	-	-
Novel02621	10.8906	462.918	-5.4096	6.59e-15	2.55e-13	-	-
Novel02622	10.6497	454.81	-5.4164	1.85e-15	7.68e-14	-	-
Novel02631	6779.41	3430.27	0.98284	1.25e-05	0.00011408	-	-
Novel02633	289.653	478.778	-0.72503	0.0024866	0.012041	-	-
Novel02634	351.878	572.376	-0.70189	0.0059524	0.025139	-	-
Novel02635	659.047	426.289	0.62855	0.0053017	0.022868	-	-
Novel02639	466.925	788.017	-0.75504	0.00094814	0.0053295	-	-
Novel02641	17130.3	4598.58	1.8973	4.63e-12	1.27e-10	-	-
Novel02643	230.366	44.8215	2.3617	1.22e-08	2.03e-07	-	-
Novel02647	470.396	96.1021	2.2912	6.47e-11	1.52e-09	-	-
Novel02652	127.874	33.5894	1.9286	2.61e-08	4.13e-07	-	-
Novel02653	180.988	87.2072	1.0534	0.00058753	0.0035068	-	-
Novel02655	63.0981	11.5782	2.4462	1.87e-07	2.55e-06	-	-
Novel02656	27.3875	8.15845	1.7471	0.0023952	0.011699	-	-
Novel02659	10.5286	0.455676	4.5302	0.0012724	0.0068812	-	-
Novel02662	89.8998	49.1659	0.87066	0.012468	0.046287	-	-
Novel02664	29.8093	310.867	-3.3825	4.2e-08	6.48e-07	-	-
Novel02668	563.576	1014.08	-0.84749	0.00030138	0.0019553	-	-
Novel02670	197.965	45.6738	2.1158	9.12e-12	2.4e-10	-	-
Novel02672	385.151	872.391	-1.1795	1.96e-06	2.16e-05	-	-
Novel02676	5166.76	1367.05	1.9182	1.03e-06	1.2e-05	-	-
Novel02678	0.309702	18.1754	-5.875	2.66e-05	0.00022563	-	-
Novel02679	387.365	63.7126	2.604	2.72e-20	1.88e-18	-	-
Novel02684	375.928	603.793	-0.6836	0.002944	0.013945	-	-
Novel02689	225.424	18.7687	3.5862	2.05e-24	2.14e-22	-	-
Novel02694	11.8808	101.173	-3.0901	7.3e-05	0.00055928	-	-
Novel02697	5231.89	1552.98	1.7523	1.38e-15	5.82e-14	-	-
Novel02698	23.466	50.8589	-1.1159	0.013056	0.04808	-	-
Novel02699	101.172	197.553	-0.96544	0.0026217	0.012607	-	-
Novel02700	18.6765	2.94878	2.663	0.001431	0.0075979	-	-
Novel02701	440.907	756.07	-0.77805	0.00067271	0.0039491	-	-
Novel02707	245.797	134.821	0.86642	0.0085342	0.033942	-	-
Novel02718	217.916	412.965	-0.92225	0.0038843	0.017636	-	-
Novel02720	45.4528	89.5162	-0.97778	0.012215	0.04557	-	-
Novel02721	115.371	26.6846	2.1122	2.09e-08	3.36e-07	-	-
Novel02723	149.916	256.307	-0.77372	0.0023624	0.011568	-	-
Novel02730	13.0038	1.71097	2.9261	0.0065618	0.027317	-	-
Novel02731	89.4113	31.5216	1.5041	5.32e-05	0.00042083	-	-
Novel02732	283.841	149.339	0.9265	0.0003869	0.0024358	-	-
Novel02733	320.013	1804.09	-2.4951	0.00031845	0.0020487	-	-
Novel02738	61.1976	136.972	-1.1623	0.0041438	0.018649	-	-
Novel02739	312.432	635.797	-1.025	2.15e-05	0.00018651	-	-
Novel02740	324.071	665.223	-1.0375	7.91e-06	7.66e-05	-	-
Novel02744	216.112	368.822	-0.77114	0.0013771	0.0073605	-	-
Novel02752	41.6653	5.31266	2.9713	7.87e-07	9.43e-06	-	-
Novel02765	519.996	879.866	-0.75878	0.0017399	0.0089696	-	-
Novel02770	52.1769	141.554	-1.4399	0.00098372	0.0055076	-	-
Novel02774	7.47213	0.326458	4.5165	0.011257	0.04266	-	-
Novel02778	216.909	42.2013	2.3617	3.16e-14	1.13e-12	-	-
Novel02780	1036.79	1749.05	-0.75445	0.0068794	0.028347	-	-
Novel02786	30.8882	4.93621	2.6456	0.004288	0.019191	-	-
Novel02790	47.5485	18.0041	1.4011	0.010935	0.041714	-	-
Novel02791	80.9772	29.7642	1.4439	0.00022876	0.0015425	-	-
Novel02792	994.951	417.709	1.2521	1.1e-07	1.57e-06	-	-
Novel02794	46.2015	19.0007	1.2819	0.0051702	0.02239	-	-
Novel02800	531.253	186.756	1.5082	5.97e-07	7.29e-06	-	-
Novel02801	125.525	222.962	-0.82883	0.0032137	0.014993	-	-
Novel02803	225.431	866.527	-1.9426	8.52e-16	3.7e-14	-	-
Novel02807	1413.97	2044.63	-0.53209	0.013154	0.048374	-	-
Novel02817	345.843	141.923	1.285	2.49e-06	2.68e-05	-	-
Novel02818	19.6709	2.3464	3.0675	0.0076907	0.031062	-	-
Novel02825	59.1976	23.8249	1.3131	0.0023306	0.011439	-	-
Novel02827	178.951	443.781	-1.3103	2.04e-07	2.76e-06	-	-
Novel02829	153.154	63.8844	1.2614	4.57e-05	0.0003662	-	-
Novel02836	1464.94	6284.42	-2.1009	1.74e-05	0.00015415	-	-
Novel02840	27.1113	5.09794	2.4109	0.00025786	0.0017082	-	-
Novel02841	25.5569	2.08797	3.6135	1.08e-05	0.00010025	-	-
Novel02843	11.1645	57.3331	-2.3605	0.001663	0.0086376	-	-
Novel02844	793.368	152.501	2.3792	3.06e-22	2.54e-20	-	-
Novel02845	1394.68	823.217	0.76059	0.00033133	0.0021224	-	-
Novel02847	25.393	61.3664	-1.273	0.0013964	0.0074497	-	-
Novel02848	9.90743	0.652917	3.9235	0.0054863	0.023507	-	-
Novel02849	28.6035	0.455676	5.972	0.00053513	0.0032354	-	-
Novel02854	122.838	359.889	-1.5508	1.28e-08	2.13e-07	-	-
Novel02857	2292.45	135.652	4.0789	4.49e-55	4.1e-52	-	-
Novel02859	360.298	836.072	-1.2144	3.41e-07	4.41e-06	-	-
Novel02864	52.4014	12.2598	2.0957	2.27e-05	0.00019576	-	-
Novel02865	2662.4	5450.93	-1.0338	4.05e-06	4.19e-05	-	-
Novel02869	726.729	1295.69	-0.83423	0.00021294	0.0014472	-	-
Novel02876	157.188	79.7371	0.97917	0.0061937	0.025991	-	-
Novel02881	42.9424	17.8287	1.2682	0.010875	0.041532	-	-
Novel02886	1006.8	635.611	0.66356	0.0037558	0.01714	-	-
Novel02890	1872.54	621.775	1.5905	5.67e-12	1.54e-10	-	-
Novel02896	27.8975	104.377	-1.9036	2.95e-07	3.86e-06	-	-
Novel02897	14.9843	51.3197	-1.7761	0.00012415	0.00089692	-	-
Novel02898	158.246	287.98	-0.8638	0.0094669	0.037016	-	-
Novel02918	88.0637	184.936	-1.0704	0.00027341	0.0017986	-	-
Novel02919	394.332	1094.15	-1.4723	4.37e-10	9.12e-09	-	-
Novel02921	207.75	347.003	-0.7401	0.0025425	0.012274	-	-
Novel02928	0	8.43217	#NAME?	0.00084048	0.0047938	-	-
Novel02929	193.071	113.804	0.76259	0.0069451	0.02856	-	-
Novel02933	86.7139	42.8261	1.0178	0.0034688	0.016027	-	-
Novel02946	2151.84	4845.62	-1.1711	1.11e-07	1.58e-06	-	-
Novel02948	1851.62	4050.58	-1.1293	2.33e-07	3.13e-06	-	-
Novel02951	279.842	703.354	-1.3296	1.9e-08	3.07e-07	-	-
Novel02952	1301.97	3062.07	-1.2338	2.29e-08	3.65e-07	-	-
Novel02963	36.8982	96.7269	-1.3904	7.8e-05	0.00059262	-	-
Novel02967	59.9446	23.9492	1.3237	0.0011896	0.0065035	-	-
Novel02974	80.8921	199.792	-1.3044	4.34e-06	4.46e-05	-	-
Novel02977	33.6169	154.975	-2.2048	1.65e-05	0.00014689	-	-
Novel02989	39.9295	2.4931	4.0014	4.09e-07	5.18e-06	-	-
Novel02991	101.208	43.8727	1.2059	0.00040174	0.0025154	-	-
Novel02995	332.84	120.335	1.4678	8.25e-07	9.84e-06	-	-
Novel02996	74.7467	35.8159	1.0614	0.0089751	0.035372	-	-
Novel02997	183.169	103.088	0.82929	0.006453	0.026942	-	-
Novel03002	1.80766	20.1994	-3.4821	0.0049778	0.021725	-	-
Novel03004	283.456	153.401	0.88582	0.00070123	0.0040911	-	-
Novel03006	635.61	1560.12	-1.2954	1.66e-08	2.7e-07	-	-
Novel03010	75.7463	160.231	-1.0809	0.00040897	0.0025533	-	-
Novel03011	252.453	851.128	-1.7534	4.79e-13	1.48e-11	-	-
Novel03013	15.6436	43.8708	-1.4877	0.0020647	0.010355	-	-
Novel03017	1461.24	2125.27	-0.54046	0.010836	0.041408	-	-
Novel03018	71.8343	12.4464	2.5289	6.16e-08	9.19e-07	-	-
Novel03019	64.9674	14.0544	2.2087	1.09e-06	1.27e-05	-	-
Novel03020	90.7575	254.69	-1.4887	2.39e-07	3.2e-06	-	-
Novel03023	5503.02	10266.3	-0.89962	2.59e-05	0.00022043	-	-
Novel03026	83.8337	25.6612	1.7079	1.35e-05	0.00012262	-	-
Novel03029	50.6821	6.48025	2.9674	0.0054135	0.023256	-	-
Novel03031	34.5488	3.08701	3.4844	8.04e-07	9.61e-06	-	-
Novel03034	6.57892	39.838	-2.5982	1.56e-05	0.00013936	-	-
Novel03041	26.7029	95.1211	-1.8328	5.51e-07	6.8e-06	-	-
Novel03042	540.356	341.243	0.66311	0.0037272	0.017039	-	-
Novel03043	1275.55	2711.1	-1.0878	1.03e-06	1.2e-05	-	-
Novel03044	43.9702	3.12635	3.814	5.25e-09	9.21e-08	-	-
Novel03045	12.8422	2.05928	2.6407	0.0062905	0.026354	-	-
Novel03046	27.723	4.9862	2.4751	0.00030195	0.0019572	-	-
Novel03047	0.29148	6.46059	-4.4702	0.012637	0.046814	-	-
Novel03048	42.7819	12.5884	1.7649	0.00052983	0.0032081	-	-
Novel03051	2012.4	3846.39	-0.93459	9.22e-05	0.00068715	-	-
Novel03056	48.2802	0	Inf	6.38e-16	2.8e-14	-	-
Novel03059	1394.23	773.589	0.84983	0.006922	0.028478	-	-
Novel03060	28.0251	80.0896	-1.5149	5.72e-05	0.00044783	-	-
Novel03071	68.571	281.397	-2.0369	0.00033035	0.0021171	-	-
Novel03073	110.958	736.098	-2.7299	6.54e-19	4.01e-17	-	-
Novel03075	505.608	157.947	1.6786	1.61e-11	4.11e-10	-	-
Novel03080	627.578	384.255	0.70773	0.0035273	0.016257	-	-
Novel03085	73.5567	19.6276	1.906	3.65e-06	3.82e-05	-	-
Novel03089	123.478	65.7232	0.90977	0.0022932	0.011288	-	-
Novel03092	23.4178	84.2953	-1.8478	4.5e-06	4.6e-05	-	-
Novel03095	16.3834	49.0373	-1.5816	0.00080536	0.0046233	-	-
Novel03098	27.8452	74.1611	-1.4132	0.00022827	0.0015396	-	-
Novel03099	1526.63	7020.04	-2.2011	0.0011428	0.0062803	-	-
Novel03101	8.84024	0.652917	3.7591	0.011371	0.043013	-	-
Novel03103	113.645	8.18713	3.795	2.41e-18	1.41e-16	-	-
Novel03104	280.444	156.573	0.84088	0.0032877	0.015295	-	-
Novel03111	1603.45	2401.7	-0.58287	0.0060617	0.025513	-	-
Novel03112	1.51207	13.7932	-3.1894	0.0012887	0.0069552	-	-
Novel03115	13167.9	3448.67	1.9329	3.2e-14	1.14e-12	-	-
Novel03120	59.1353	356.12	-2.5903	8.02e-20	5.33e-18	-	-
Novel03125	509.048	259.087	0.97436	9.34e-05	0.00069566	-	-
Novel03127	36.0561	14.2207	1.3422	0.010485	0.040322	-	-
Novel03139	20.2715	4.40349	2.2027	0.003812	0.017361	-	-
Novel03150	3884.57	2441.99	0.6697	0.0028636	0.013608	-	-
Novel03151	5.7879	0	Inf	0.012879	0.047576	-	-
Novel03153	1551.03	11.3198	7.0982	3.82e-20	2.6e-18	-	-
Novel03154	244.807	796.393	-1.7018	1.74e-12	5.01e-11	-	-
Novel03163	3248.11	1493.39	1.121	0.0001	0.00073954	-	-
Novel03171	21.2229	90.9668	-2.0997	6.87e-08	1.02e-06	-	-
Novel03173	264.492	151.197	0.80679	0.0024851	0.01204	-	-
Novel03176	72.7245	166.496	-1.195	0.00010203	0.00075308	-	-
Novel03177	110.049	223.54	-1.0224	0.00016318	0.0011444	-	-
Novel03186	986.991	63.3104	3.9625	2.01e-36	5.57e-34	-	-
Novel03189	13.0732	117.265	-3.1651	2.37e-13	7.61e-12	-	-
Novel03193	144.986	37.5924	1.9474	1.24e-08	2.07e-07	-	-
Novel03194	473.72	167.103	1.5033	1.29e-08	2.13e-07	-	-
Novel03195	42.2054	403.517	-3.2571	1.61e-18	9.63e-17	-	-
Novel03198	90.9899	26.5966	1.7745	0.0010001	0.0055883	-	-
Novel03209	323.279	85.7552	1.9145	1.5e-11	3.84e-10	-	-
Novel03210	543.983	895.384	-0.71895	0.0013022	0.0070226	-	-
Novel03211	73.2739	4.49337	4.0274	2.55e-14	9.26e-13	-	-
Novel03214	97.1349	41.5271	1.2259	0.0004977	0.0030356	-	-
Novel03215	516.173	188.089	1.4564	6.65e-09	1.15e-07	-	-
Novel03216	1246.66	606.939	1.0384	8.85e-06	8.46e-05	-	-
Novel03217	38.1998	14.4483	1.4027	0.0054784	0.02348	-	-
Novel03219	110.532	35.4651	1.64	4.99e-06	5.06e-05	-	-
Novel03221	95.9972	33.9158	1.501	3.12e-05	0.00026073	-	-
Novel03232	120.424	39.6036	1.6044	9.17e-06	8.72e-05	-	-
Novel03247	39.9	82.616	-1.05	0.004148	0.018663	-	-
Novel03248	665.053	418.324	0.66885	0.002423	0.011797	-	-
Novel03256	198.535	58.9143	1.7527	1.13e-08	1.89e-07	-	-
Novel03265	842.034	505.321	0.73668	0.0099664	0.038681	-	-
Novel03267	11.8015	1.01871	3.5341	0.0037374	0.01707	-	-
Novel03277	70.72	34.5384	1.0339	0.0076505	0.030922	-	-
Novel03280	769.771	371.752	1.0501	6.63e-06	6.54e-05	-	-
Novel03282	114.713	370.251	-1.6905	1.15e-10	2.6e-09	-	-
Novel03285	316.678	644.016	-1.0241	0.0014383	0.0076315	-	-
Novel03286	3005.19	664.635	2.1768	6.51e-21	4.81e-19	-	-
Novel03290	344.928	120.25	1.5203	2.94e-07	3.86e-06	-	-
Novel03291	228.789	96.7599	1.2415	3.34e-05	0.00027784	-	-
Novel03294	125.935	58.1483	1.1149	0.00065832	0.0038775	-	-
Novel03297	4.65606	51.0305	-3.4542	0.00064339	0.0038022	-	-
Novel03300	32.4497	150.564	-2.2141	2.11e-11	5.29e-10	-	-
Novel03301	97.4742	467.304	-2.2613	0.00097335	0.0054593	-	-
Novel03309	866.403	480.599	0.85021	0.0001944	0.0013366	-	-
Novel03310	22.5028	2.4931	3.1741	0.00011287	0.00082375	-	-
Novel03314	206.074	43.6107	2.2404	1.64e-12	4.74e-11	-	-
Novel03317	483.599	207.375	1.2216	1.42e-06	1.62e-05	-	-
Novel03320	127.215	54.8947	1.2125	0.00010286	0.00075882	-	-
Novel03323	27.8465	3.75277	2.8915	2.11e-05	0.00018434	-	-
Novel03324	70.7478	4.79798	3.8822	2.94e-12	8.26e-11	-	-
Novel03332	482.952	1475.56	-1.6113	4.62e-12	1.27e-10	-	-
Novel03338	886.235	2435.62	-1.4585	1.25e-10	2.82e-09	-	-
Novel03340	15.2375	3.25556	2.2266	0.011029	0.041969	-	-
Novel03343	79.4727	36.6027	1.1185	0.0024548	0.011924	-	-
Novel03346	934.719	465.228	1.0066	9.53e-06	9.02e-05	-	-
Novel03351	0.910884	11.8372	-3.6999	0.0013899	0.007422	-	-
Novel03352	74.8332	203.413	-1.4427	0.01198	0.044856	-	-
Novel03356	406.63	261.196	0.63859	0.012475	0.046305	-	-
Novel03367	36.3657	190.872	-2.392	1.06e-07	1.52e-06	-	-
Novel03369	110.108	314.82	-1.5156	7.97e-08	1.17e-06	-	-
Novel03375	187.793	399.065	-1.0875	1.11e-05	0.0001025	-	-
Novel03376	268.365	625.924	-1.2218	5.29e-07	6.55e-06	-	-
Novel03377	160.596	265.941	-0.72767	0.0041436	0.018649	-	-
Novel03379	299.172	478.499	-0.67754	0.0036781	0.016867	-	-
Novel03380	78.2121	30.0557	1.3798	0.013028	0.048011	-	-
Novel03382	36.0279	140.723	-1.9657	7.4e-09	1.27e-07	-	-
Novel03385	216.37	19.3815	3.4808	2.12e-24	2.2e-22	-	-
Novel03387	233.319	375.55	-0.6867	0.0084172	0.033528	-	-
Novel03390	42.7637	87.7079	-1.0363	0.0040537	0.018311	-	-
Novel03397	3.48602	51.1793	-3.8759	3.69e-11	8.9e-10	-	-
Novel03399	2389.78	131.51	4.1836	1.46e-59	1.88e-56	-	-
Novel03404	19.3671	2.61167	2.8906	0.0019834	0.010012	-	-
Novel03406	368.208	647.061	-0.81338	0.00080644	0.0046267	-	-
Novel03416	281.131	954.293	-1.7632	1.95e-13	6.33e-12	-	-
Novel03427	6776.11	2612.25	1.3752	1.14e-10	2.58e-09	-	-
Novel03429	77.0204	271.999	-1.8203	2.35e-10	5.07e-09	-	-
Novel03430	44.7013	122.574	-1.4553	0.0024009	0.011711	-	-
Novel03431	23.4014	5.94591	1.9766	0.0054152	0.023256	-	-
Novel03433	46.3919	86.8736	-0.90504	0.010504	0.040364	-	-
Novel03434	187.363	306.292	-0.70907	0.0057569	0.024455	-	-
Novel03436	3715.88	13512.6	-1.8625	4.97e-06	5.04e-05	-	-
Novel03437	788.223	5036.19	-2.6757	9.81e-26	1.12e-23	-	-
Novel03446	451.626	202.845	1.1548	8.2e-06	7.9e-05	-	-
Novel03449	117.943	41.4654	1.5081	1.12e-05	0.00010365	-	-
Novel03451	59.2671	19.6913	1.5897	0.0003984	0.0024972	-	-
Novel03452	102.205	33.6812	1.6014	1.76e-05	0.00015615	-	-
Novel03453	480.202	945.872	-0.978	0.0002431	0.0016245	-	-
Novel03456	0	14.4242	#NAME?	2.72e-06	2.91e-05	-	-
Novel03457	20.7434	0.326458	5.9896	9.01e-07	1.07e-05	-	-
Novel03458	125.981	15.055	3.0649	2.91e-15	1.17e-13	-	-
Novel03460	195.402	95.9095	1.0267	0.00059231	0.0035268	-	-
Novel03462	31.0469	6.44311	2.2686	0.00022982	0.0015493	-	-
Novel03466	0.587077	13.4886	-4.522	0.00018817	0.001299	-	-
Novel03474	182.886	818.77	-2.1625	8.02e-07	9.59e-06	-	-
Novel03477	74.9477	29.3023	1.3549	0.00062722	0.0037167	-	-
Novel03483	460.674	243.209	0.92155	0.00030832	0.001994	-	-
Novel03484	138.811	698.903	-2.332	0.0035385	0.016301	-	-
Novel03485	133.127	5.38068	4.6289	1.53e-23	1.46e-21	-	-
Novel03486	59.5632	3.2359	4.2022	3.25e-11	7.91e-10	-	-
Novel03488	27.9963	3.514	2.994	1.98e-05	0.00017303	-	-
Novel03490	333.607	513.554	-0.62236	0.0092112	0.036171	-	-
Novel03494	147.889	35.7713	2.0476	3.89e-09	6.96e-08	-	-
Novel03495	594.656	1150.97	-0.95272	3.85e-05	0.00031392	-	-
Novel03499	137.011	48.7709	1.4902	6.85e-05	0.00052743	-	-
Novel03509	152.372	52.38	1.5405	3.78e-06	3.93e-05	-	-
Novel03510	2682.62	5380.07	-1.004	2.16e-06	2.36e-05	-	-
Novel03513	4.0731	20.843	-2.3554	0.0019591	0.0099129	-	-
Novel03517	82.8595	0	Inf	7.02e-25	7.53e-23	-	-
Novel03524	146.407	78.8318	0.89314	0.0036472	0.016736	-	-
Novel03526	78.2939	42.053	0.89669	0.013607	0.04976	-	-
Novel03542	602.284	373.157	0.69066	0.0031946	0.014921	-	-
Novel03544	293.352	496.138	-0.75811	0.0014187	0.0075474	-	-
Novel03551	282.384	169.83	0.73357	0.0067649	0.027933	-	-
Novel03555	6.03059	0	Inf	0.0099967	0.038767	-	-
Novel03572	357.772	190.77	0.9072	0.00065253	0.003849	-	-
Novel03578	306.078	515.358	-0.75168	0.0088457	0.034969	-	-
Novel03581	158.739	309.676	-0.96411	0.00022154	0.0014988	-	-
Novel03585	53.2646	26.0877	1.0298	0.012336	0.045912	-	-
Novel03602	143.747	1778.97	-3.6294	2.56e-10	5.48e-09	-	-
Novel03607	1721.91	676.333	1.3482	3.28e-09	5.93e-08	-	-
Novel03608	462.124	1182.78	-1.3558	6.65e-09	1.15e-07	-	-
Novel03610	304.929	6088.1	-4.3194	1.69e-67	3.98e-64	-	-
Novel03611	62.957	801.751	-3.6707	2.37e-39	8.28e-37	-	-
Novel03612	390.797	3027.17	-2.9535	2.26e-35	5.87e-33	-	-
Novel03613	1278.65	15679.9	-3.6162	7.54e-35	1.84e-32	-	-
Novel03614	265.168	4462.12	-4.0728	1.38e-29	2.13e-27	-	-
Novel03619	27.1912	10.0076	1.442	0.012156	0.045396	-	-
Novel03627	102.332	53.7932	0.92777	0.0067369	0.027845	-	-
Novel03630	126.335	550.138	-2.1225	0.012155	0.045396	-	-
Novel03631	2.98182	13.9399	-2.225	0.011711	0.04405	-	-
Novel03639	8.47587	0	Inf	0.0014576	0.0077228	-	-
Novel03644	41.7429	11.1731	1.9015	0.00023727	0.0015934	-	-
Novel03646	17.5242	1.30583	3.7463	0.00026369	0.0017403	-	-
Novel03649	635.154	302.496	1.0702	1.18e-05	0.00010808	-	-
Novel03652	59.9835	24.1054	1.3152	0.0020932	0.010482	-	-
Novel03653	420.557	205.612	1.0324	3.74e-05	0.00030677	-	-
Novel03654	725.251	323.352	1.1654	3.67e-05	0.00030116	-	-
Novel03659	54.7485	20.6657	1.4056	0.0024656	0.011964	-	-
Novel03660	192.345	102.321	0.91059	0.0019484	0.0098755	-	-
Novel03665	25.3971	6.25707	2.0211	0.0017336	0.0089456	-	-
Novel03679	84.4432	240.344	-1.509	2.15e-07	2.9e-06	-	-
Novel03684	99.9681	167.681	-0.74618	0.0074014	0.030096	-	-
Novel03700	473	210.779	1.1661	3.37e-06	3.55e-05	-	-
Novel03701	57.5311	6.20872	3.212	5.1e-10	1.06e-08	-	-
Novel03704	43.6805	8.39065	2.3801	1.39e-05	0.00012557	-	-
Novel03705	79.314	470.733	-2.5693	8.64e-11	1.99e-09	-	-
Novel03707	0.29148	59.0755	-7.663	9.37e-20	6.14e-18	-	-
Novel03714	44.6325	1.91039	4.5462	6.32e-11	1.48e-09	-	-
Novel03716	120.349	384.78	-1.6768	4.32e-10	9.04e-09	-	-
Novel03720	35.4102	1.94973	4.1828	0.0057693	0.024486	-	-
Novel03722	157.438	365.454	-1.2149	0.00042406	0.0026353	-	-
Novel03725	2.49638	28.4242	-3.5092	0.0022334	0.011036	-	-
Novel03731	27.6155	7.73773	1.8355	0.0033935	0.015715	-	-
Novel03733	412.669	139.2	1.5678	0.00044019	0.0027236	-	-
Novel03734	390.071	209.536	0.89654	0.0014203	0.0075533	-	-
Novel03739	14.0287	1.69349	3.0503	0.0017481	0.0090023	-	-
Novel03745	616.727	1015.01	-0.71879	0.013445	0.049258	-	-
Novel03749	50.0702	281.435	-2.4908	0.00044161	0.0027294	-	-
Novel03754	29.6718	9.44024	1.6522	0.0063128	0.026436	-	-
Novel03759	88.4117	576.111	-2.704	2.59e-05	0.00022061	-	-
Novel03760	5.58105	22.162	-1.9895	0.0030493	0.014353	-	-
Novel03761	36.3693	107.971	-1.5699	7.65e-06	7.42e-05	-	-
Novel03764	9.89508	0.782134	3.6612	0.0052907	0.022831	-	-
Novel03765	1413.28	10961.5	-2.9553	1.86e-34	4.28e-32	-	-
Novel03769	1.18826	515.357	-8.7606	6.87e-84	6.48e-80	-	-
Novel03780	59.1577	8.98456	2.719	6.63e-08	9.84e-07	-	-
Novel03787	130.295	35.5063	1.8756	2.62e-07	3.47e-06	-	-
Novel03789	19.9441	44.5761	-1.1603	0.011088	0.042152	-	-
Novel03790	552.893	879.976	-0.67046	0.0034947	0.016131	-	-
Novel03793	686.035	451.927	0.60219	0.010192	0.039405	-	-
Novel03796	26.6417	72.9099	-1.4524	0.00063662	0.0037685	-	-
Novel03800	38.9222	110.037	-1.4993	2.58e-05	0.00021928	-	-
Novel03801	339.943	710.86	-1.0643	4.25e-06	4.37e-05	-	-
Novel03804	27.4945	57.7282	-1.0701	0.0068254	0.028145	-	-
Novel03806	141.743	278.845	-0.97618	0.00024998	0.0016638	-	-
Novel03808	77.014	549.051	-2.8337	1.7e-05	0.00015085	-	-
Novel03809	76.3711	670.443	-3.134	0.0013587	0.0072742	-	-
Novel03812	3374.88	5930.69	-0.81336	0.00015567	0.0010978	-	-
Novel03817	448.686	267.415	0.74663	0.0084019	0.03349	-	-
Novel03819	18.1054	2.61167	2.7934	0.0083673	0.033367	-	-
Novel03821	181.579	99.3823	0.86953	0.0053307	0.022948	-	-
Novel03824	3803.16	1150.11	1.7254	3.3e-10	6.97e-09	-	-
Novel03826	431.306	279.093	0.62797	0.010717	0.041043	-	-
Novel03827	22.8648	0	Inf	2.41e-08	3.84e-07	-	-
Novel03828	151.674	23.6282	2.6824	2.15e-14	7.89e-13	-	-
Novel03830	152.136	81.4238	0.90184	0.0061286	0.025771	-	-
Novel03831	507.415	303.206	0.74287	0.0040506	0.0183	-	-
Novel03833	18.5303	0	Inf	0.00043154	0.0026771	-	-
Novel03834	97.0569	55.9505	0.79468	0.013546	0.049579	-	-
Novel03835	21.6054	4.0377	2.4198	0.0013589	0.0072742	-	-
Novel03836	26.1176	5.22497	2.3215	0.0059975	0.025276	-	-
Novel03842	1711.84	880.688	0.95885	8.96e-06	8.55e-05	-	-
Novel03845	288.085	145.729	0.9832	0.00087335	0.0049603	-	-
Novel03847	27.4703	6.6775	2.0405	0.0020236	0.010173	-	-
Novel03860	105.25	227.089	-1.1094	7.94e-05	0.00060214	-	-
Novel03861	47.0413	114.959	-1.2891	0.00013996	0.00099792	-	-
Novel03865	1.7671	54.1103	-4.9364	2.31e-09	4.3e-08	-	-
Novel03866	184.874	447.732	-1.2761	2.38e-07	3.18e-06	-	-
Novel03871	110.742	290.913	-1.3934	0.0099014	0.038471	-	-
Novel03872	170.178	29.9243	2.5077	0.00015895	0.0011175	-	-
Novel03875	478.776	1093.77	-1.1919	8.03e-05	0.00060748	-	-
Novel03876	3.73107	64.498	-4.1116	6.14e-08	9.16e-07	-	-
Novel03879	828.768	3956.3	-2.2551	1.4e-20	1e-18	-	-
Novel03887	210.925	127.658	0.72445	0.011095	0.042171	-	-
Novel03889	256.119	134.763	0.92639	0.00065045	0.0038396	-	-
Novel03891	14.9578	1.36484	3.4541	0.001119	0.0061612	-	-
Novel03894	644.691	1032.73	-0.67978	0.0033396	0.015506	-	-
Novel03898	42.092	109.532	-1.3797	5.93e-05	0.00046286	-	-
Novel03901	498.319	26.2743	4.2453	5.56e-43	2.46e-40	-	-
Novel03919	298.226	166.566	0.84031	0.0023274	0.011432	-	-
Novel03921	62.1819	115.841	-0.89758	0.004279	0.019159	-	-
Novel03955	948.452	1658.86	-0.80654	0.00029005	0.0018896	-	-
Novel03971	123.918	1634.25	-3.7212	2.2e-38	6.99e-36	-	-
Novel03975	24.351	2.30488	3.4012	4.07e-05	0.00033072	-	-
Novel03977	575.476	5813.17	-3.3365	2.16e-05	0.00018728	-	-
Novel03979	1053.59	3137.92	-1.5745	3.36e-05	0.00027855	-	-
Novel03982	111.475	55.6008	1.0035	0.0035515	0.016353	-	-
Novel03991	888.335	330.894	1.4247	1.09e-05	0.00010083	-	-
Novel03993	25.4782	6.16719	2.0466	0.0016033	0.0083753	-	-
Novel03999	111.696	53.1758	1.0707	0.0022037	0.010916	-	-
Novel04001	131.623	31.1138	2.0808	2.36e-09	4.38e-08	-	-
Novel04002	60.4054	176.273	-1.5451	7.2e-07	8.7e-06	-	-
Novel04004	35.3815	11.3219	1.6439	0.0021337	0.010641	-	-
Novel04005	353.059	84.748	2.0587	1.39e-13	4.61e-12	-	-
Novel04006	125.772	40.4923	1.6351	1.95e-06	2.15e-05	-	-
Novel04008	320.485	94.8215	1.757	2.8e-11	6.92e-10	-	-
Novel04009	145.219	37.5897	1.9498	1.43e-09	2.76e-08	-	-
Novel04010	139.726	11.8328	3.5617	1.56e-18	9.35e-17	-	-
Novel04013	704.895	431.345	0.70857	0.0091433	0.03593	-	-
Novel04019	106.867	42.3295	1.3361	0.0039296	0.017821	-	-
Novel04021	768.22	371.11	1.0497	1.33e-05	0.00012094	-	-
Novel04022	1.20648	29.166	-4.5954	0.0026546	0.012745	-	-
Novel04036	20.0411	125.741	-2.6494	9.64e-13	2.86e-11	-	-
Novel04038	446.935	273.725	0.70734	0.011158	0.04236	-	-
Novel04039	217.117	476.872	-1.1351	0.0016686	0.0086588	-	-
Novel04052	4870.36	2669.53	0.86744	0.0001471	0.0010441	-	-
Novel04053	32.2146	187.28	-2.5394	0.010357	0.039929	-	-
Novel04054	4.40278	24.8723	-2.4981	0.00038938	0.0024483	-	-
Novel04055	10.7595	114.85	-3.4161	3.68e-11	8.88e-10	-	-
Novel04058	1265.54	201.953	2.6477	5.3e-27	6.85e-25	-	-
Novel04060	272.913	120.282	1.182	0.00082269	0.0047123	-	-
Novel04065	263.047	475.07	-0.85282	0.00054144	0.0032679	-	-
Novel04067	1961.52	4154.37	-1.0827	0.0012547	0.0068029	-	-
Novel04069	89.1259	279.466	-1.6488	0.0027817	0.01327	-	-
Novel04070	842.871	2937.63	-1.8013	0.0016493	0.0085853	-	-
Novel04072	10.6115	1.23781	3.0998	0.0072438	0.029552	-	-
Novel04073	328.31	21.7833	3.9138	5e-32	9.26e-30	-	-
Novel04074	850.558	1382.78	-0.70109	0.0017614	0.0090605	-	-
Novel04076	219.722	636.282	-1.534	5.42e-10	1.12e-08	-	-
Novel04080	67.6813	137.336	-1.0209	0.00092622	0.005225	-	-
Novel04081	5207.3	9677.26	-0.89406	3.48e-05	0.00028765	-	-
Novel04089	21.0084	95.565	-2.1855	8.14e-09	1.38e-07	-	-
Novel04097	426.534	266.051	0.68096	0.0042535	0.01907	-	-
Novel04098	1817.06	1044.03	0.79944	0.00040548	0.0025354	-	-
Novel04099	539.662	349.092	0.62845	0.010367	0.039956	-	-
Novel04102	212.513	106.335	0.99894	0.00024987	0.0016634	-	-
Novel04105	310.231	158.815	0.966	0.00042533	0.0026426	-	-
Novel04111	65.8195	12.1677	2.4355	3.08e-07	4.01e-06	-	-
Novel04120	401.851	863.996	-1.1044	2.9e-06	3.08e-05	-	-
Novel04122	198.525	77.4118	1.3587	7.5e-06	7.3e-05	-	-
Novel04127	30.2112	219.924	-2.8639	1.43e-10	3.2e-09	-	-
Novel04146	1298.62	671.784	0.95091	2.92e-05	0.00024576	-	-
Novel04150	1011.71	567.398	0.83436	0.00037491	0.0023689	-	-
Novel04151	685.235	2304.24	-1.7496	0.0037897	0.017267	-	-
Novel04152	60.7791	7.60224	2.9991	2.69e-09	4.94e-08	-	-
Novel04156	46.1258	0.652917	6.1425	1.02e-10	2.33e-09	-	-
Novel04161	588.016	1670.62	-1.5065	4.72e-11	1.13e-09	-	-
Novel04166	710.537	448.234	0.66466	0.0032651	0.015202	-	-
Novel04167	489.911	1013.22	-1.0484	3.96e-06	4.11e-05	-	-
Novel04168	1057.09	2449.88	-1.2126	4.97e-08	7.54e-07	-	-
Novel04169	665.796	384.275	0.79294	0.0018598	0.0094928	-	-
Novel04174	391.798	195.52	1.0028	0.00013081	0.0009381	-	-
Novel04181	566.147	247.167	1.1957	0.00041173	0.0025683	-	-
Novel04188	18.4803	4.32263	2.096	0.012068	0.045125	-	-
Novel04189	1195.44	696.604	0.77914	0.00023748	0.0015941	-	-
Novel04196	144.79	381.665	-1.3983	7e-08	1.03e-06	-	-
Novel04197	31.3248	69.8273	-1.1565	0.002525	0.012204	-	-
Novel04200	679.516	322.62	1.0747	2.38e-05	0.00020419	-	-
Novel04205	24.2365	0	Inf	4.99e-08	7.58e-07	-	-
Novel04206	224.501	122.772	0.87075	0.0082053	0.03279	-	-
Novel04207	623.642	262.091	1.2507	4.75e-07	5.94e-06	-	-
Novel04208	900.877	431.613	1.0616	5.77e-06	5.79e-05	-	-
Novel04213	589.892	105.157	2.4879	1.02e-10	2.32e-09	-	-
Novel04215	7944.96	5280.55	0.58935	0.0041893	0.018824	-	-
Novel04216	2390.89	4532.58	-0.92278	2.29e-05	0.00019716	-	-
Novel04217	282.923	663.009	-1.2286	0.005188	0.022452	-	-
Novel04218	366.253	227.983	0.68391	0.0078672	0.031641	-	-
Novel04229	9.02239	0.455676	4.3074	0.0036819	0.016874	-	-
Novel04239	7.03669	0	Inf	0.0046564	0.020564	-	-
Novel04242	92.1464	161.835	-0.81253	0.0039202	0.017787	-	-
Novel04243	205.585	96.4308	1.0922	0.00019356	0.0013324	-	-
Novel04248	25.5146	3.27742	2.9607	3.95e-05	0.00032112	-	-
Novel04249	828.064	469.283	0.81928	0.00060162	0.0035785	-	-
Novel04250	1395.53	508.152	1.4575	4.41e-10	9.19e-09	-	-
Novel04251	59.8771	22.7278	1.3975	0.0016998	0.0087964	-	-
Novel04254	60.9759	19.4924	1.6453	0.0065393	0.027232	-	-
Novel04262	11.5211	70.0125	-2.6033	0.0026835	0.012873	-	-
Novel04265	20.5065	4.10791	2.3196	0.0022736	0.011209	-	-
Novel04281	52.228	24.5718	1.0878	0.011024	0.041962	-	-
Novel04282	849.307	264.209	1.6846	2.18e-08	3.5e-07	-	-
Novel04285	788.967	13.3178	5.8885	2.35e-71	8.31e-68	-	-
Novel04286	320.79	153.042	1.0677	8.97e-05	0.00067147	-	-
Novel04287	484.225	228.12	1.0859	3.65e-06	3.82e-05	-	-
Novel04289	1315.13	2458.69	-0.90268	7.7e-05	0.00058586	-	-
Novel04307	52.3685	15.1214	1.7921	0.00017455	0.0012131	-	-
Novel04312	157.273	71.4205	1.1389	0.0015256	0.0080303	-	-
Novel04314	248.078	110.119	1.1717	1.45e-05	0.00013034	-	-
Novel04328	109.039	52.2789	1.0605	0.0015283	0.00804	-	-
Novel04330	940.036	1553.65	-0.72488	0.001379	0.0073679	-	-
Novel04334	66.9149	23.7653	1.4935	0.00014361	0.0010216	-	-
Novel04335	4.24472	24.7471	-2.5435	0.00019727	0.0013537	-	-
Novel04336	95.1709	18.1571	2.39	1.76e-09	3.33e-08	-	-
Novel04338	139.844	248.658	-0.83035	0.0028008	0.013343	-	-
Novel04342	48.6491	109.4	-1.1691	0.001274	0.0068852	-	-
Novel04350	1413.59	6129.98	-2.1165	2.06e-06	2.26e-05	-	-
Novel04351	99.531	55.046	0.85451	0.010391	0.040028	-	-
Novel04355	264.286	421.475	-0.67334	0.0064959	0.02708	-	-
Novel04357	11.704	37.7235	-1.6885	0.0088521	0.034985	-	-
Novel04360	267.338	130.995	1.0292	0.00012914	0.00092778	-	-
Novel04361	153.53	43.308	1.8258	4.4e-08	6.74e-07	-	-
Novel04371	88.5398	21.3495	2.0521	6.34e-07	7.7e-06	-	-
Novel04373	50.3769	21.8027	1.2083	0.005781	0.024524	-	-
Novel04376	1572.49	2346.65	-0.57756	0.012979	0.047849	-	-
Novel04378	199.947	79.0651	1.3385	0.00043277	0.0026829	-	-
Novel04380	21.7271	1.89073	3.5225	4.25e-05	0.00034375	-	-
Novel04388	17.0328	1.93006	3.1416	0.0011884	0.0064979	-	-
Novel04389	13.3218	2.23685	2.5742	0.0089429	0.03527	-	-
Novel04395	60.6411	142.193	-1.2295	5.67e-05	0.00044491	-	-
Novel04402	264.711	90.0991	1.5548	6.67e-08	9.88e-07	-	-
Novel04406	33.5015	7.64158	2.1323	0.00028138	0.0018429	-	-
Novel04410	35.3327	13.2127	1.4191	0.0061954	0.025994	-	-
Novel04412	3.88447	88.808	-4.5149	3.54e-07	4.56e-06	-	-
Novel04413	60.0011	25.376	1.2415	0.0050317	0.021924	-	-
Novel04414	428.827	216.679	0.98484	8.09e-05	0.00061089	-	-
Novel04421	1174.28	3920.51	-1.7393	0.00038696	0.0024358	-	-
Novel04429	499.495	290.998	0.77946	0.0022463	0.01109	-	-
Novel04430	335.426	188.33	0.83273	0.0012168	0.0066329	-	-
Novel04447	150.556	44.4715	1.7593	0.00046647	0.0028657	-	-
Novel04456	86.8455	36.8403	1.2372	0.00039798	0.0024951	-	-
Novel04457	31.537	11.0135	1.5178	0.0099165	0.038519	-	-
Novel04460	163.007	88.8217	0.87595	0.003337	0.015499	-	-
Novel04461	125.93	51.7888	1.2819	9.55e-05	0.00070985	-	-
Novel04462	5.64982	61.0605	-3.434	3.03e-11	7.42e-10	-	-
Novel04470	265.724	1155.56	-2.1206	7.77e-19	4.73e-17	-	-
Novel04482	193.608	79.8929	1.277	2.55e-05	0.00021722	-	-
Novel04486	70.753	162.316	-1.1979	4.32e-05	0.00034851	-	-
Novel04491	30.2795	0	Inf	2.84e-07	3.73e-06	-	-
Novel04499	539.733	3201.93	-2.5686	0.00070547	0.0041115	-	-
Novel04504	102.705	288.231	-1.4887	6.49e-08	9.65e-07	-	-
Novel04509	210.996	108.682	0.95711	0.00085494	0.0048685	-	-
Novel04510	131.845	528.201	-2.0022	0.00046162	0.0028413	-	-
Novel04513	67.1824	168.559	-1.3271	1.45e-05	0.00013091	-	-
Novel04515	33.8471	10.7111	1.6599	0.0021304	0.010633	-	-
Novel04517	168.379	92.7403	0.86044	0.0050817	0.022084	-	-
Novel04529	84.0542	41.1517	1.0304	0.0034954	0.016131	-	-
Novel04534	137.519	40.6698	1.7576	1.91e-07	2.6e-06	-	-
Novel04537	102.246	17.4938	2.5471	3.32e-10	7.01e-09	-	-
Novel04542	37.5447	527.863	-3.8135	9.89e-08	1.43e-06	-	-
Novel04543	1956.07	6417.89	-1.7141	6.99e-15	2.7e-13	-	-
Novel04544	924.807	332.55	1.4756	6.45e-10	1.31e-08	-	-
Novel04545	624.906	359.482	0.79772	0.00086722	0.0049285	-	-
Novel04548	205.213	5323.96	-4.6973	1.24e-14	4.66e-13	-	-
Novel04549	165.208	13.9049	3.5706	3.36e-21	2.58e-19	-	-
Novel04550	346.566	203.725	0.7665	0.0027741	0.013247	-	-
Novel04554	208.72	69.5451	1.5855	1.44e-07	1.99e-06	-	-
Novel04557	11.0916	40.2936	-1.8611	0.01197	0.04484	-	-
Novel04564	125.911	420.341	-1.7392	0.00025374	0.0016864	-	-
Novel04570	131.415	73.2957	0.84233	0.0088047	0.034831	-	-
Novel04571	49.057	20.7357	1.2423	0.0043438	0.019401	-	-
Novel04574	419.01	655.047	-0.64461	0.0057779	0.024519	-	-
Novel04576	15.482	3.0168	2.3595	0.011019	0.041951	-	-
Novel04580	529.431	108.984	2.2803	1.66e-08	2.71e-07	-	-
Novel04587	80.8307	15.0029	2.4297	1.43e-08	2.36e-07	-	-
Novel04590	81.9298	37.7328	1.1186	0.0033851	0.015686	-	-
Novel04591	88.4488	46.9419	0.91397	0.0074566	0.030285	-	-
Novel04594	54.0898	24.675	1.1323	0.0067715	0.027956	-	-
Novel04609	1.69246	20.5387	-3.6011	5.89e-05	0.00045974	-	-
Novel04613	258.126	398.468	-0.62639	0.0098486	0.038302	-	-
Novel04616	1123.26	1944.84	-0.79195	0.00045234	0.0027898	-	-
Novel04620	9.00829	0	Inf	0.00093579	0.0052685	-	-
Novel04662	1603.14	379.61	2.0783	1.75e-08	2.83e-07	-	-
Novel04665	482.12	264.538	0.86592	0.00051487	0.0031303	-	-
Novel04667	1899.72	3172.89	-0.74001	0.00072113	0.0041891	-	-
Novel04668	60.842	18.3393	1.7301	7.24e-05	0.00055462	-	-
Novel04670	220.42	410.159	-0.89593	0.00034902	0.0022236	-	-
Novel04673	62.7272	21.4001	1.5515	0.0018853	0.0096093	-	-
Novel04679	729.139	429.714	0.76282	0.0013336	0.0071648	-	-
Novel04687	11.7903	32.8794	-1.4796	0.0060991	0.025663	-	-
Novel04688	214.22	120.139	0.83439	0.0034816	0.016073	-	-
Novel04691	26.1281	4.31361	2.5986	0.00027139	0.0017865	-	-
Novel04697	218.365	370.68	-0.76344	0.003329	0.015471	-	-
Novel04698	48.8396	144.767	-1.5676	9.05e-07	1.07e-05	-	-
Novel04699	202.842	380.475	-0.90745	0.00024565	0.0016384	-	-
Novel04701	90.3146	11.3613	2.9908	5.53e-12	1.5e-10	-	-
Novel04702	806.604	3867.76	-2.2616	0.00077869	0.0044856	-	-
Novel04705	1232.9	516.626	1.2549	8.58e-08	1.25e-06	-	-
Novel04707	16.7896	0.346127	5.6001	1.55e-05	0.00013925	-	-
Novel04713	2027.77	655.438	1.6294	2.46e-13	7.87e-12	-	-
Novel04717	482.332	223.155	1.112	0.0019721	0.009969	-	-
Novel04720	286.37	162.259	0.81958	0.0052546	0.02271	-	-
Novel04744	6.73111	0	Inf	0.0059262	0.02504	-	-
Novel04746	4121.09	766.958	2.4258	1.66e-12	4.8e-11	-	-
Novel04760	59.6827	132.478	-1.1504	0.00020044	0.0013734	-	-
Novel04767	27.0683	1.36484	4.3098	4.19e-06	4.31e-05	-	-
Novel04768	49.3143	0.326458	7.239	7.71e-11	1.8e-09	-	-
Novel04773	2556.7	1605.13	0.67159	0.0016316	0.008498	-	-
Novel04774	1787.11	307.016	2.5412	2.43e-26	2.98e-24	-	-
Novel04775	124.095	11.8238	3.3917	1.89e-16	8.8e-15	-	-
Novel04777	32.1041	147.237	-2.1973	6.36e-06	6.31e-05	-	-
Novel04786	148.945	254.516	-0.77298	0.0049154	0.021507	-	-
Novel04789	3.49014	25.3479	-2.8605	4.84e-05	0.00038607	-	-
Novel04794	21.1764	3.85794	2.4566	0.002277	0.011222	-	-
Novel04819	14.5224	0	Inf	1.36e-05	0.00012315	-	-
Novel04820	565.661	222.303	1.3474	0.0023697	0.011597	-	-
Novel04823	2435.53	3931.95	-0.69101	0.0021776	0.010809	-	-
Novel04825	4.21239	20.2409	-2.2646	0.0046345	0.020474	-	-
Novel04828	33518.8	10147.4	1.7239	6.04e-07	7.36e-06	-	-
Novel04830	10209.5	306.532	5.0577	6.92e-14	2.37e-12	-	-
Novel04836	57.2567	9.84318	2.5402	5.19e-07	6.44e-06	-	-
Novel04839	5.24901	22.7469	-2.1156	0.001934	0.0098221	-	-
Novel04852	19.5081	3.49433	2.481	0.0015867	0.0083011	-	-
Novel04853	72.4284	8.05792	3.1681	3.7e-11	8.92e-10	-	-
Novel04854	1133.2	480.249	1.2386	0.00051225	0.003117	-	-
Novel04857	99.833	46.1319	1.1138	0.0017463	0.0089964	-	-
Novel04858	977.118	347.124	1.4931	1.32e-07	1.85e-06	-	-
Novel04862	36.0549	94.2556	-1.3864	0.0069184	0.028467	-	-
Novel04864	33.0285	11.4383	1.5298	0.0077243	0.031167	-	-
Novel04866	15.284	125.689	-3.0398	1.07e-15	4.57e-14	-	-
Novel04869	39.6832	7.93497	2.3222	4.47e-05	0.00035945	-	-
Novel04870	280.614	475.229	-0.76004	0.0024618	0.011949	-	-
Novel04871	10.1255	1.36703	2.8889	0.0097351	0.037934	-	-
Novel04874	3.68052	20.0262	-2.4439	0.0013062	0.0070373	-	-
Novel04876	1740.68	3340.34	-0.94035	2.34e-05	0.00020105	-	-
Novel04880	74.2314	4.54173	4.0307	5.5e-14	1.92e-12	-	-
Novel04881	499.755	239.559	1.0608	0.00012697	0.00091455	-	-
Novel04888	163.057	391.81	-1.2648	8.7e-07	1.03e-05	-	-
Novel04889	136.462	225.261	-0.7231	0.008183	0.032715	-	-
Novel04892	60.4059	116.025	-0.94167	0.0042116	0.018913	-	-
Novel04903	145.898	40.7182	1.8412	4.3e-08	6.61e-07	-	-
Novel04908	1769.79	4473.19	-1.3377	2.81e-09	5.13e-08	-	-
Novel04917	83.5377	183.99	-1.1391	5.51e-05	0.00043372	-	-
Novel04920	47.0589	160.373	-1.7689	7.34e-05	0.00056099	-	-
Novel04923	87.7024	37.4102	1.2292	0.0006694	0.0039329	-	-
Novel04931	129.756	10.1391	3.6778	1.18e-19	7.71e-18	-	-
Novel04939	41.0913	12.4327	1.7247	0.00057264	0.0034299	-	-
Novel04940	101.539	37.8833	1.4224	7.98e-05	0.00060456	-	-
Novel04949	259.318	138.199	0.90798	0.00092682	0.0052263	-	-
Novel04952	2845.69	5279.1	-0.89151	3.29e-05	0.00027396	-	-
Novel04954	108.622	25.1837	2.1088	2.49e-08	3.95e-07	-	-
Novel04958	8.85901	0	Inf	0.0018068	0.0092558	-	-
Novel04961	3.25508	194.202	-5.8987	1.11e-36	3.15e-34	-	-
Novel04962	3375.29	1166.9	1.5323	3.4e-10	7.18e-09	-	-
Novel04963	141.749	18.5256	2.9357	3.06e-14	1.1e-12	-	-
Novel04968	55.8816	204.715	-1.8732	8.26e-10	1.66e-08	-	-
Novel04973	31.7238	12.085	1.3924	0.012269	0.045735	-	-
Novel04974	2.3724	12.4065	-2.3867	0.010672	0.040905	-	-
Novel04977	311.742	97.9194	1.6707	6.97e-10	1.42e-08	-	-
Novel04989	373.481	599.345	-0.68235	0.0044118	0.019656	-	-
Novel04992	100.331	30.8534	1.7013	0.00031156	0.0020103	-	-
Novel04998	268.992	157.504	0.77218	0.0060175	0.025349	-	-
Novel05007	1180.84	507.594	1.2181	2.31e-07	3.1e-06	-	-
Novel05012	45.4581	14.4355	1.6549	0.0011347	0.0062383	-	-
Novel05014	160.547	88.7146	0.85576	0.0059029	0.024956	-	-
Novel05016	557.622	172.309	1.6943	1.85e-09	3.48e-08	-	-
Novel05017	36.8802	2.41443	3.9331	0.011189	0.042448	-	-
Novel05025	142.648	5.05641	4.8182	5.69e-15	2.22e-13	-	-
Novel05031	255.232	1202.88	-2.2366	0.0004239	0.0026349	-	-
Novel05036	302.052	743.753	-1.3	1.02e-07	1.47e-06	-	-
Novel05039	284.704	162.648	0.80771	0.0023169	0.011387	-	-
Novel05041	264.119	111.565	1.2433	3.02e-06	3.2e-05	-	-
Novel05044	4464.62	2391.39	0.90069	2.18e-05	0.00018917	-	-
Novel05046	41.827	2.32455	4.1694	2.77e-09	5.07e-08	-	-
Novel05049	25.8754	360.324	-3.7996	2.97e-27	3.97e-25	-	-
Novel05050	190.031	30.2644	2.6505	8.28e-15	3.15e-13	-	-
Novel05055	2825.73	531.369	2.4108	1.99e-25	2.25e-23	-	-
Novel05056	68.9824	22.6423	1.6072	0.00012709	0.00091494	-	-
Novel05058	28.5852	0.346127	6.3678	4.12e-09	7.32e-08	-	-
Novel05061	23.2198	0.999043	4.5387	2.5e-06	2.7e-05	-	-
Novel05062	3.28329	43.3342	-3.7223	1.53e-09	2.93e-08	-	-
Novel05064	502.157	289.37	0.79522	0.00089202	0.0050522	-	-
Novel05070	6.06291	37.2897	-2.6207	0.0030044	0.014188	-	-
Novel05072	517.717	51.0851	3.3412	1.61e-15	6.76e-14	-	-
Novel05075	15.8487	3.514	2.1732	0.0087323	0.034617	-	-
Novel05078	565.827	184.439	1.6172	2.14e-09	3.99e-08	-	-
Novel05085	87.9627	298.964	-1.765	2.16e-10	4.69e-09	-	-
Novel05088	1632.22	5457.35	-1.7414	4.35e-15	1.71e-13	-	-
Novel05094	1.46152	26.4275	-4.1765	5.67e-07	6.97e-06	-	-
Novel05096	295.758	99.785	1.5675	1.17e-08	1.96e-07	-	-
Novel05099	11.3014	0.911351	3.6323	0.0021873	0.010851	-	-
Novel05105	36.1502	1.34517	4.7481	2.96e-09	5.37e-08	-	-
Novel05114	12.4355	1.89073	2.7175	0.0078675	0.031641	-	-
Novel05116	54.1104	14.8603	1.8644	0.00011928	0.00086529	-	-
Novel05117	16.96	1.78118	3.2512	0.00067231	0.0039475	-	-
Novel05119	34.7627	0	Inf	1.6e-08	2.62e-07	-	-
Novel05137	26.7993	4.47152	2.5834	0.0039315	0.017822	-	-
Novel05138	39.9082	7.04329	2.5024	4.05e-05	0.00032874	-	-
Novel05145	502.404	1091.97	-1.12	0.0020634	0.010353	-	-
Novel05148	35.3433	7.81477	2.1772	0.00035961	0.0022834	-	-
Novel05150	15.7106	3.88198	2.0169	0.011469	0.04333	-	-
Novel05154	483.317	292.14	0.72631	0.0081145	0.032473	-	-
Novel05157	0.896779	29.4443	-5.0371	6.66e-09	1.15e-07	-	-
Novel05161	17109.4	887.433	4.269	1.11e-17	5.97e-16	-	-
Novel05162	922.009	72.7783	3.6632	1.62e-06	1.82e-05	-	-
Novel05165	43884.7	1945.63	4.4954	4.09e-20	2.78e-18	-	-
Novel05168	50.9892	102.906	-1.0131	0.0045967	0.020348	-	-
Novel05169	70.1423	20.5346	1.7722	2.32e-05	0.00019994	-	-
Novel05171	13.9823	0.326458	5.4206	0.00010981	0.00080527	-	-
Novel05172	75.546	21.6782	1.8011	1.94e-05	0.00017018	-	-
Novel05174	263.116	503.413	-0.93604	0.0041576	0.018703	-	-
Novel05175	44.2112	2.1273	4.3773	2.78e-10	5.94e-09	-	-
Novel05177	116.034	193.571	-0.73832	0.0083017	0.033125	-	-
Novel05178	18.4562	0	Inf	7.47e-07	8.99e-06	-	-
Novel05183	9.19401	0	Inf	0.0017255	0.0089121	-	-
Novel05187	22.3301	2.45376	3.1859	0.00012974	0.00093139	-	-
Novel05191	42.2414	193.328	-2.1943	3.94e-07	5.01e-06	-	-
Novel05192	149.816	372.616	-1.3145	5.26e-07	6.52e-06	-	-
Novel05197	25.3765	0.979375	4.6955	7.24e-07	8.74e-06	-	-
Novel05198	144.846	32.7417	2.1453	5.03e-07	6.26e-06	-	-
Novel05199	1192.47	2374.86	-0.99389	2.4e-05	0.00020607	-	-
Novel05200	168.641	301.505	-0.83823	0.0012167	0.0066329	-	-
Novel05202	10.8788	0.672585	4.0157	0.002977	0.014067	-	-
Novel05205	106.223	23.6279	2.1685	0.0010854	0.0059986	-	-
Novel05215	0	6.89659	#NAME?	0.002623	0.012608	-	-
Novel05218	127.685	70.4936	0.85703	0.0075866	0.030716	-	-
Novel05221	135.596	61.3935	1.1432	0.00026853	0.0017702	-	-
Novel05222	646.528	1154.52	-0.83651	0.00040048	0.0025086	-	-
Novel05227	1153.78	3498.39	-1.6003	0.00017034	0.0011877	-	-
Novel05240	119.196	32.4289	1.878	4.36e-07	5.51e-06	-	-
Novel05246	58.4115	218.747	-1.9049	2.02e-10	4.4e-09	-	-
Novel05257	28.4053	0.692254	5.3587	2.44e-08	3.89e-07	-	-
Novel05264	357.464	548.559	-0.61785	0.009832	0.038254	-	-
Novel05272	195.123	96.737	1.0122	0.00099611	0.0055704	-	-
Novel05274	533.987	329.587	0.69614	0.0044741	0.019874	-	-
Novel05276	33.5162	132.658	-1.9848	8.11e-07	9.69e-06	-	-
Novel05286	90.6477	161.614	-0.83421	0.0038185	0.017387	-	-
Novel05288	0.587077	9.30883	-3.987	0.0027756	0.013252	-	-
Novel05289	95.9403	364.225	-1.9246	2.13e-12	6.06e-11	-	-
Novel05291	24.1177	86.3871	-1.8407	0.010876	0.041532	-	-
Novel05301	88.4586	5.19465	4.0899	4.81e-16	2.15e-14	-	-
Novel05318	545.527	2472.61	-2.1803	0.00070892	0.0041266	-	-
Novel05322	14.0805	270.568	-4.2642	8.19e-36	2.17e-33	-	-
Novel05338	22.0715	4.92938	2.1627	0.0043857	0.019549	-	-
Novel05342	625.925	1065.23	-0.7671	0.0011674	0.0063994	-	-
Novel05343	88.4704	1049.51	-3.5684	1.91e-07	2.6e-06	-	-
Novel05348	274.623	159.008	0.78835	0.0027129	0.012988	-	-
Novel05349	342.162	584.997	-0.77375	0.00081537	0.0046713	-	-
Novel05355	102.606	24.4562	2.0688	2.15e-06	2.35e-05	-	-
Novel05356	216.795	121.732	0.83262	0.0020295	0.0102	-	-
Novel05360	11.4759	62.0612	-2.4351	1.7e-07	2.32e-06	-	-
Novel05363	559.782	202.114	1.4697	3.26e-09	5.89e-08	-	-
Novel05375	327.628	29.5782	3.4695	7.06e-10	1.43e-08	-	-
Novel05376	372.823	93.0501	2.0024	3.4e-14	1.21e-12	-	-
Novel05378	59.7955	6.25269	3.2575	5.59e-07	6.89e-06	-	-
Novel05379	1026.43	254.838	2.01	1.86e-16	8.68e-15	-	-
Novel05384	72.211	19.3143	1.9026	1.09e-05	0.00010148	-	-
Novel05386	365.588	198.968	0.87768	0.0013653	0.0073047	-	-
Novel05393	33.1214	2.03742	4.0229	1.57e-07	2.17e-06	-	-
Novel05394	118.602	24.5368	2.2731	3.21e-10	6.79e-09	-	-
Novel05397	1.85821	79.8637	-5.4256	1.34e-17	7.14e-16	-	-
Novel05399	14.3261	143.584	-3.3252	0.013373	0.049025	-	-
Novel05400	57.3043	234.087	-2.0303	3.86e-05	0.00031475	-	-
Novel05401	50.6731	277.67	-2.4541	8.87e-06	8.48e-05	-	-
Novel05402	97.98	26.3243	1.8961	3.58e-07	4.6e-06	-	-
Novel05403	119.878	67.4774	0.82909	0.011594	0.043691	-	-
Novel05404	75.8397	21.6713	1.8072	9.86e-06	9.3e-05	-	-
Novel05415	97.3747	31.9601	1.6073	2.34e-05	0.00020105	-	-
Novel05422	0.277376	9.93306	-5.1623	0.00071888	0.0041777	-	-
Novel05423	402.201	633.305	-0.65499	0.0052693	0.02276	-	-
Novel05424	140.506	233.475	-0.73264	0.0069652	0.028626	-	-
Novel05430	71.5499	2.4931	4.8429	5.01e-12	1.37e-10	-	-
Novel05434	10.7736	46.9469	-2.1235	0.00017005	0.0011864	-	-
Novel05449	73.7872	25.812	1.5153	0.0016909	0.0087552	-	-
Novel05451	36.8072	6.57014	2.486	0.00040116	0.0025123	-	-
Novel05453	31.423	137.907	-2.1338	9.36e-06	8.89e-05	-	-
Novel05459	1327.98	3250.5	-1.2914	0.00016669	0.0011659	-	-
Novel05464	1.15182	29.6372	-4.6854	1.33e-08	2.2e-07	-	-
Novel05467	370.902	73.8473	2.3284	6.43e-17	3.17e-15	-	-
Novel05468	7.73485	0	Inf	0.0027722	0.013243	-	-
Novel05469	5.85431	0	Inf	0.012032	0.045014	-	-
Novel05471	535.904	301.985	0.8275	0.00057808	0.0034552	-	-
Novel05475	49.2915	20.8999	1.2378	0.0060102	0.025323	-	-
Novel05476	767.027	1407.88	-0.87617	0.00010881	0.0007983	-	-
Novel05478	140.063	72.9187	0.94172	0.0026905	0.0129	-	-
Novel05483	53.8171	9.84974	2.4499	5.02e-07	6.26e-06	-	-
Novel05484	37.1563	12.7245	1.546	0.0050996	0.022155	-	-
Novel05489	38.5831	12.1199	1.6706	0.0027642	0.013207	-	-
Novel05507	19.9071	93.3645	-2.2296	1.97e-05	0.00017286	-	-
Novel05508	313.826	646.569	-1.0428	1.55e-05	0.00013861	-	-
Novel05520	308.904	167.706	0.88122	0.00049425	0.0030198	-	-
Novel05528	59.9716	12.1041	2.3088	6.84e-07	8.28e-06	-	-
Novel05534	139.571	76.4414	0.86857	0.0036995	0.016937	-	-
Novel05537	140.264	603.168	-2.1044	0.0013501	0.0072355	-	-
Novel05542	14.2086	2.14697	2.7264	0.0057444	0.024417	-	-
Novel05544	53.7414	2.69253	4.319	9.41e-11	2.16e-09	-	-
Novel05545	114.994	32.3101	1.8315	2.99e-07	3.91e-06	-	-
Novel05551	672.85	1115.86	-0.7298	0.0010497	0.0058251	-	-
Novel05555	257.356	465.129	-0.85387	0.00087187	0.0049529	-	-
Novel05556	52.8733	17.511	1.5943	0.00027627	0.0018132	-	-
Novel05557	28.6521	10.0229	1.5153	0.012342	0.045912	-	-
Novel05562	62.9077	19.1214	1.718	6.67e-05	0.00051549	-	-
Novel05563	424.307	238.301	0.83232	0.00077999	0.0044922	-	-
Novel05564	174.632	57.2837	1.6081	4.01e-07	5.09e-06	-	-
Novel05579	19.3283	5.68502	1.7655	0.0069619	0.028617	-	-
Novel05585	1289.44	585.328	1.1394	3.31e-06	3.49e-05	-	-
Novel05586	322.62	46.5133	2.7941	8.78e-12	2.31e-10	-	-
Novel05605	12.9968	61.4047	-2.2402	2.34e-05	0.00020091	-	-
Novel05608	9.94151	1.14793	3.1144	0.010817	0.041357	-	-
Novel05610	218.327	124.556	0.8097	0.0032511	0.015149	-	-
Novel05611	333.098	155.574	1.0983	3.78e-05	0.00030884	-	-
Novel05615	929.66	366.487	1.3429	6.65e-09	1.15e-07	-	-
Novel05617	1345.74	7364.06	-2.4521	1.06e-26	1.36e-24	-	-
Novel05618	27.1725	8.47834	1.6803	0.0090342	0.035565	-	-
Novel05619	2443.16	4443.44	-0.86293	9.04e-05	0.0006761	-	-
Novel05625	75.61	30.5223	1.3087	0.0012666	0.0068593	-	-
Novel05628	123.171	223.258	-0.85804	0.0021054	0.010534	-	-
Novel05632	822.741	1585.23	-0.94618	2.24e-05	0.00019355	-	-
Novel05637	5.89075	22.2016	-1.9141	0.0066663	0.02763	-	-
Novel05638	158.062	36.5403	2.1129	1.27e-10	2.86e-09	-	-
Novel05646	442.593	271.82	0.70333	0.0047421	0.020855	-	-
Novel05650	75.5824	312.2	-2.0464	2.05e-13	6.63e-12	-	-
Novel05652	7.57909	65.0954	-3.1025	2.19e-10	4.76e-09	-	-
Novel05653	156.685	1878.48	-3.5836	2.99e-33	6.19e-31	-	-
Novel05658	99.6343	7359.98	-6.2069	1.12e-47	6.12e-45	-	-
Novel05660	344.784	871.167	-1.3373	0.0055034	0.023573	-	-
Novel05663	1942.17	469.392	2.0488	2.01e-19	1.28e-17	-	-
Novel05664	110.491	0	Inf	3.06e-16	1.39e-14	-	-
Novel05671	2257.33	4931.44	-1.1274	0.0043318	0.019366	-	-
Novel05673	209.881	48.9493	2.1002	2.3e-11	5.73e-10	-	-
Novel05674	150.475	72.7616	1.0483	0.0021223	0.010602	-	-
Novel05678	809	409.396	0.98264	4.21e-05	0.00034064	-	-
Novel05679	1275.19	2006.27	-0.6538	0.0025678	0.012379	-	-
Novel05680	126.339	18.4966	2.772	2.29e-13	7.37e-12	-	-
Novel05685	54.8955	109.724	-0.99912	0.0037614	0.01716	-	-
Novel05689	148.832	22.9687	2.6959	7.77e-14	2.65e-12	-	-
Novel05692	1579.67	3765.27	-1.2531	1.71e-08	2.79e-07	-	-
Novel05701	1900	3019.73	-0.66843	0.0025517	0.01231	-	-
Novel05702	231.53	515.12	-1.1537	7.99e-06	7.73e-05	-	-
Novel05707	264.663	85.8401	1.6244	8.48e-09	1.44e-07	-	-
Novel05708	1.45153	12.5139	-3.1079	0.0057067	0.024271	-	-
Novel05710	511.519	294.142	0.79828	0.0015972	0.0083481	-	-
Novel05711	6.12169	32.5972	-2.4127	6.74e-05	0.00052029	-	-
Novel05713	274.324	10.4589	4.7131	2.79e-19	1.76e-17	-	-
Novel05714	17.7128	0.672585	4.7189	3.22e-05	0.00026804	-	-
Novel05717	50.2831	3.95001	3.6701	0.0067587	0.027911	-	-
Novel05718	9.65003	0	Inf	0.00057383	0.0034363	-	-
Novel05719	0.554751	16.4486	-4.89	2.06e-05	0.00017978	-	-
Novel05724	104.749	56.746	0.88435	0.010051	0.038945	-	-
Novel05727	34.3143	82.9222	-1.2729	0.0009761	0.0054715	-	-
Novel05734	8.55699	69.862	-3.0293	2.34e-05	0.00020122	-	-
Novel05735	6.65768	30.7305	-2.2066	0.00027246	0.0017932	-	-
Novel05736	19.2813	90.3554	-2.2284	1.69e-07	2.31e-06	-	-
Novel05739	395.093	76.2994	2.3724	2.79e-15	1.13e-13	-	-
Novel05741	638.509	3233.45	-2.3403	1.17e-23	1.12e-21	-	-
Novel05742	13.5304	1.25748	3.4276	0.0011842	0.0064789	-	-
Novel05743	179.305	81.2247	1.1424	0.00021243	0.0014444	-	-
Novel05750	33.6426	199.2	-2.5659	1.93e-15	7.97e-14	-	-
Novel05763	108.83	14.7483	2.8835	5.05e-09	8.89e-08	-	-
Novel05767	2303.31	1385.91	0.73288	0.0035689	0.016422	-	-
Novel05770	37.0205	99.8005	-1.4307	3.26e-05	0.00027155	-	-
Novel05771	244.807	54.1543	2.1765	2.65e-13	8.42e-12	-	-
Novel05776	32.5242	4.09452	2.9898	1.92e-05	0.00016807	-	-
Novel05783	646.086	1101.26	-0.76935	0.00061249	0.0036363	-	-
Novel05784	170.853	94.9097	0.84813	0.0039529	0.017915	-	-
Novel05795	77.7662	35.0687	1.149	0.0057936	0.024567	-	-
Novel05798	30.961	98.5679	-1.6707	0.0063657	0.02663	-	-
Novel05800	74.7046	501.461	-2.7469	1.57e-07	2.16e-06	-	-
Novel05806	23.379	6.85507	1.77	0.012314	0.045862	-	-
Novel05811	650.858	401.509	0.69691	0.0023006	0.011318	-	-
Novel05828	123.508	526.173	-2.0909	0.0001102	0.00080772	-	-
Novel05846	199.39	529.088	-1.4079	0.00096769	0.0054351	-	-
Novel05852	1331.22	2269.86	-0.76986	0.00059514	0.0035422	-	-
Novel05856	136.673	62.7826	1.1223	0.0080956	0.032414	-	-
Novel05862	78.0112	247.03	-1.6629	8.39e-09	1.42e-07	-	-
Novel05868	1019	631.125	0.69115	0.002966	0.014026	-	-
Novel05869	19.1643	1.14793	4.0613	3.55e-05	0.0002927	-	-
Novel05880	206.768	121.409	0.76814	0.012157	0.045396	-	-
Novel05882	183.059	79.181	1.2091	8.04e-05	0.00060819	-	-
Novel05883	126.62	37.7079	1.7476	0.00040945	0.0025557	-	-
Novel05887	1818.03	4388.68	-1.2714	7.67e-09	1.31e-07	-	-
Novel05892	213.027	580.25	-1.4456	0.00065054	0.0038396	-	-
Novel05894	378.388	891.416	-1.2362	4.64e-07	5.81e-06	-	-
Novel05896	19.6426	5.70031	1.7849	0.011585	0.04367	-	-
Novel05899	249.037	50.8485	2.2921	6.76e-14	2.33e-12	-	-
Novel05903	233.525	49.2413	2.2456	7.46e-08	1.1e-06	-	-
Novel05907	12.3645	95.0157	-2.942	1.49e-10	3.33e-09	-	-
Novel05908	22.1402	146.258	-2.7238	9.66e-06	9.13e-05	-	-
Novel05913	770.18	1788.17	-1.2152	6.41e-08	9.54e-07	-	-
Novel05915	525.358	947.401	-0.85067	0.00017055	0.0011888	-	-
Novel05919	352.755	738.237	-1.0654	1.12e-05	0.00010378	-	-
Novel05920	18.2429	3.90848	2.2227	0.0066653	0.02763	-	-
Novel05921	4.70249	21.4569	-2.1899	0.01083	0.041396	-	-
Novel05922	0.832127	20.1448	-4.5975	2.52e-06	2.71e-05	-	-
Novel05925	230.563	3147.38	-3.7709	1.48e-34	3.47e-32	-	-
Novel05929	130.129	1982	-3.9289	6.44e-54	5.21e-51	-	-
Novel05930	1277.61	18977.4	-3.8928	4.46e-14	1.56e-12	-	-
Novel05932	236.917	3919.31	-4.0481	8.94e-51	5.38e-48	-	-
Novel05940	98.1899	575.012	-2.5499	1.34e-22	1.16e-20	-	-
Novel05941	38.6565	117.662	-1.6059	0.0040771	0.018402	-	-
Novel05945	441.953	920.711	-1.0589	3.91e-06	4.06e-05	-	-
Novel05946	62.9582	16.4751	1.9341	2.21e-05	0.00019172	-	-
Novel05957	68.9811	963.317	-3.8037	3.21e-14	1.14e-12	-	-
Novel05959	53.9481	20.3352	1.4076	0.001891	0.0096348	-	-
Novel05967	227.937	117.738	0.95305	0.00067617	0.0039645	-	-
Novel05969	56.923	4.65128	3.6133	2.66e-06	2.85e-05	-	-
Novel05972	163.325	75.5033	1.1131	9.68e-05	0.00071796	-	-
Novel05973	218.347	14.7242	3.8904	2.6e-15	1.06e-13	-	-
Novel05975	1657.64	1121.72	0.56342	0.0061612	0.025878	-	-
Novel05978	4621.54	355.882	3.6989	8.29e-12	2.2e-10	-	-
Novel05979	88.7849	162.577	-0.87273	0.0036433	0.016724	-	-
Novel05984	498.243	765.516	-0.61958	0.0066609	0.027624	-	-
Novel05987	684.929	3833.41	-2.4846	1.66e-07	2.29e-06	-	-
Novel05989	76.3839	281.473	-1.8817	2.84e-11	6.99e-10	-	-
Novel05994	141.038	33.423	2.0772	1.03e-09	2.03e-08	-	-
Novel06011	109.752	42.0593	1.3837	6.74e-05	0.00052029	-	-
Novel06012	18.3157	0.979375	4.2251	6.48e-05	0.0005021	-	-
Novel06018	20.4131	89.123	-2.1263	3.99e-07	5.07e-06	-	-
Novel06019	8.86022	0	Inf	0.0011096	0.0061122	-	-
Novel06020	313.971	1700.39	-2.4372	1.86e-05	0.0001642	-	-
Novel06025	98.7217	263.679	-1.4173	0.0082064	0.03279	-	-
Novel06026	20.3461	3.62355	2.4893	0.0010127	0.0056487	-	-
Novel06027	13.0021	0.326458	5.3157	0.00023694	0.0015917	-	-
Novel06031	99.5384	268.997	-1.4343	0.001018	0.0056736	-	-
Novel06034	54.2444	106.684	-0.9758	0.0023945	0.011699	-	-
Novel06035	483.354	19.8732	4.6042	6.61e-47	3.53e-44	-	-
Novel06037	37.0146	10.7242	1.7872	0.0018124	0.0092792	-	-
Novel06050	205.675	326.361	-0.6661	0.0066949	0.027704	-	-
Novel06053	5.55284	61.128	-3.4605	3.04e-11	7.44e-10	-	-
Novel06054	79.9429	34.7247	1.203	0.0030743	0.014457	-	-
Novel06055	1398.12	678.448	1.0432	4.18e-06	4.31e-05	-	-
Novel06058	52.4461	20.5914	1.3488	0.0032033	0.014956	-	-
Novel06059	671.826	239.144	1.4902	2.44e-09	4.52e-08	-	-
Novel06069	8.64217	0	Inf	0.0012197	0.0066439	-	-
Novel06075	43.9543	20.6879	1.0872	0.013644	0.049866	-	-
Novel06078	3451.23	2053.38	0.74911	0.0011686	0.0064034	-	-
Novel06087	31731.3	54471.3	-0.77959	0.00032832	0.002105	-	-
Novel06088	161.949	81.8402	0.98466	0.0010811	0.0059804	-	-
Novel06092	6.47371	27.8741	-2.1063	0.00057736	0.0034538	-	-
Novel06096	0.277376	9.3875	-5.0808	0.00454	0.020125	-	-
Novel06100	39.9677	6.09479	2.7132	1.78e-05	0.00015768	-	-
Novel06104	1258.65	5783.19	-2.2	1.42e-22	1.22e-20	-	-
Novel06105	1533.82	507.376	1.596	4.42e-12	1.22e-10	-	-
Novel06107	96.7708	24.4824	1.9828	0.00019439	0.0013366	-	-
Novel06108	22.2431	66.9247	-1.5892	0.00016507	0.0011559	-	-
Novel06117	23.2397	2.3464	3.3081	3.45e-05	0.00028546	-	-
Novel06119	266.949	34.6521	2.9455	1.21e-13	4.02e-12	-	-
Novel06124	595.151	1612.13	-1.4376	1.12e-07	1.59e-06	-	-
Novel06125	206.616	44.2387	2.2236	3.75e-08	5.82e-07	-	-
Novel06130	113.997	38.8387	1.5534	9.81e-06	9.25e-05	-	-
Novel06134	267.74	518.425	-0.95331	0.0014234	0.0075652	-	-
Novel06135	20.4342	69.7688	-1.7716	1.53e-05	0.00013754	-	-
Novel06138	791.194	323.418	1.2906	7.7e-08	1.13e-06	-	-
Novel06145	451.356	85.3856	2.4022	1.59e-12	4.62e-11	-	-
Novel06146	232.608	129.829	0.84129	0.0021392	0.010658	-	-
Novel06147	894.673	519.954	0.78298	0.00030422	0.0019688	-	-
Novel06148	184.535	72.0803	1.3562	7.84e-06	7.6e-05	-	-
Novel06149	543.827	18.2297	4.8988	1.6e-52	1.13e-49	-	-
Novel06151	9.09291	32.4704	-1.8363	0.0094029	0.036817	-	-
Novel06155	55.1093	6.13632	3.1669	2.74e-09	5.02e-08	-	-
Novel06157	38.2716	14.9108	1.3599	0.010797	0.041295	-	-
Novel06158	67.5016	4.74962	3.829	0.0018456	0.0094254	-	-
Novel06159	33.4581	3.75058	3.1572	0.0024106	0.011751	-	-
Novel06160	188.843	13.5413	3.8018	0.00058444	0.0034895	-	-
Novel06161	167.618	6.09479	4.7815	0.00033123	0.0021222	-	-
Novel06162	799.706	45.3151	4.1414	3.92e-07	4.99e-06	-	-
Novel06163	73.675	1.36484	5.7544	9.12e-05	0.00068109	-	-
Novel06164	39.1179	5.29299	2.8857	0.0021929	0.010875	-	-
Novel06165	18.3604	3.8186	2.2655	0.0066362	0.027546	-	-
Novel06166	66.1093	351.914	-2.4123	2.93e-10	6.23e-09	-	-
Novel06167	84.9632	12.5144	2.7632	6.12e-09	1.06e-07	-	-
Novel06170	48.98	15.9333	1.6201	0.0004298	0.0026681	-	-
Novel06173	7.13954	0	Inf	0.0044537	0.019802	-	-
Novel06175	242.892	1636.13	-2.7519	8.2e-30	1.29e-27	-	-
Novel06178	7.32406	60.021	-3.0348	0.0046995	0.020716	-	-
Novel06179	80.5964	455.617	-2.499	1.69e-09	3.2e-08	-	-
Novel06180	1824.84	15395.2	-3.0766	8.76e-40	3.14e-37	-	-
Novel06181	74.2256	238.012	-1.681	5.09e-09	8.94e-08	-	-
Novel06185	252.353	107.424	1.2321	1.76e-05	0.00015547	-	-
Novel06186	626.568	226.168	1.4701	1.82e-08	2.95e-07	-	-
Novel06189	21.9134	4.31361	2.3448	0.0018063	0.0092546	-	-
Novel06191	23.3203	70.0377	-1.5865	0.00010067	0.00074436	-	-
Novel06192	97.0837	48.3232	1.0065	0.0037698	0.01719	-	-
Novel06197	35.6871	5.63912	2.6619	2.18e-05	0.00018896	-	-
Novel06199	229.96	59.0965	1.9602	2.39e-11	5.94e-10	-	-
Novel06205	667.34	276.543	1.2709	1.59e-07	2.19e-06	-	-
Novel06208	13.2148	0	Inf	3.57e-05	0.00029403	-	-
Novel06211	51.7997	2.76901	4.2255	6.62e-08	9.83e-07	-	-
Novel06212	30.9634	1.91039	4.0186	1.92e-07	2.61e-06	-	-
Novel06221	43.895	0.346127	6.9866	3.62e-09	6.49e-08	-	-
Novel06222	46.1063	2.08797	4.4648	8.49e-11	1.97e-09	-	-
Novel06224	123.502	56.828	1.1199	0.00089831	0.0050857	-	-
Novel06225	261.647	123.227	1.0863	0.00013379	0.00095776	-	-
Novel06226	3224.53	2163.11	0.57598	0.0067028	0.027727	-	-
Novel06233	707.164	1514.42	-1.0986	9.89e-07	1.16e-05	-	-
Novel06234	6.41263	192.486	-4.9077	3.14e-10	6.66e-09	-	-
Novel06238	631.839	242.431	1.382	1.39e-08	2.3e-07	-	-
Novel06242	0	19.1758	#NAME?	0.00022337	0.001509	-	-
Novel06243	110.245	47.131	1.226	0.00041678	0.0025975	-	-
Novel06246	5.61749	20.0593	-1.8363	0.0087192	0.034575	-	-
Novel06253	833.865	150.712	2.468	7.22e-23	6.47e-21	-	-
Novel06259	32.8787	0	Inf	1.88e-09	3.54e-08	-	-
Novel06260	8.53816	0	Inf	0.011123	0.042262	-	-
Novel06261	4241.67	11953.7	-1.4947	3.9e-05	0.00031727	-	-
Novel06262	70.6708	22.035	1.6813	7.22e-05	0.00055383	-	-
Novel06275	393.075	4.11856	6.5765	2.95e-60	3.98e-57	-	-
Novel06277	105.391	43.299	1.2833	0.0032556	0.015166	-	-
Novel06278	227.369	4.77831	5.5724	3.87e-24	3.88e-22	-	-
Novel06284	109.597	57.4539	0.93173	0.0054667	0.023441	-	-
Novel06288	151.691	400.085	-1.3992	1.12e-07	1.6e-06	-	-
Novel06296	565.857	874.4	-0.62786	0.0094842	0.037074	-	-
Novel06301	21.2511	59.4998	-1.4853	0.012339	0.045912	-	-
Novel06312	10.3317	0.782134	3.7235	0.0041776	0.018778	-	-
Novel06313	69.6123	180.158	-1.3718	8.8e-06	8.42e-05	-	-
Novel06317	12.0048	0.346127	5.1162	0.0012812	0.0069185	-	-
Novel06318	35.4474	6.87911	2.3654	0.013325	0.048883	-	-
Novel06327	118.793	53.5039	1.1507	0.00066973	0.0039333	-	-
Novel06329	19.672	1.12826	4.124	2.52e-05	0.00021473	-	-
Novel06334	98.5411	183.468	-0.89673	0.0012237	0.00666	-	-
Novel06363	589.146	3990.71	-2.7599	5.47e-10	1.13e-08	-	-
Novel06367	22.9007	0	Inf	2.05e-06	2.25e-05	-	-
Novel06385	144.553	43.6918	1.7262	1.8e-05	0.00015896	-	-
Novel06391	167.298	59.025	1.503	2.03e-06	2.23e-05	-	-
Novel06392	77.0157	155.915	-1.0175	0.00057521	0.0034436	-	-
Novel06394	9.09939	0.346127	4.7164	0.0037251	0.017033	-	-
Novel06397	1378.63	627.906	1.1346	3.69e-07	4.74e-06	-	-
Novel06398	347.294	151.284	1.1989	6.66e-06	6.57e-05	-	-
Novel06400	80.7586	211.262	-1.3873	0.0018591	0.0094911	-	-
Novel06401	182.925	420.159	-1.1997	1.08e-05	0.00010008	-	-
Novel06403	80.8691	138.227	-0.77338	0.0079472	0.031921	-	-
Novel06404	63.5912	158.613	-1.3186	1.79e-05	0.00015834	-	-
Novel06409	148.322	5.09575	4.8633	8.11e-06	7.83e-05	-	-
Novel06410	551.098	217.303	1.3426	5.15e-07	6.4e-06	-	-
Novel06411	164.235	52.9168	1.634	3.76e-07	4.8e-06	-	-
Novel06412	192.966	114.936	0.74752	0.0088295	0.034915	-	-
Novel06414	1111.07	622.481	0.83585	0.00045854	0.0028247	-	-
Novel06415	23.7493	7.06296	1.7495	0.010767	0.041211	-	-
Novel06425	24.4357	0.782134	4.9654	3.43e-07	4.42e-06	-	-
Novel06427	1221.25	528.674	1.2079	8.29e-08	1.21e-06	-	-
Novel06433	269.239	76.3319	1.8185	8.18e-05	0.00061711	-	-
Novel06434	1178.12	4450.68	-1.9175	1.67e-11	4.24e-10	-	-
Novel06436	247.38	614.057	-1.3116	0.0027821	0.01327	-	-
Novel06437	0.29148	7.03702	-4.5935	0.0089077	0.035155	-	-
Novel06439	56.4887	17.5263	1.6884	0.00017367	0.0012076	-	-
Novel06441	322.472	153.998	1.0663	6.46e-05	0.00050118	-	-
Novel06443	119.882	29.2957	2.0329	8.8e-08	1.28e-06	-	-
Novel06451	3302.54	482.626	2.7746	1.38e-32	2.71e-30	-	-
Novel06453	26.58	8.78732	1.5968	0.0099534	0.038641	-	-
Novel06454	58.3902	9.20366	2.6654	8.31e-08	1.21e-06	-	-
Novel06458	64.7171	25.1591	1.3631	0.0016608	0.0086314	-	-
Novel06459	253.192	533.918	-1.0764	6.34e-06	6.29e-05	-	-
Novel06463	31.2996	8.67558	1.8511	0.0028943	0.013742	-	-
Novel06465	70.8887	8.29231	3.0957	2.21e-10	4.8e-09	-	-
Novel06467	46.6122	1151.48	-4.6266	1.42e-22	1.22e-20	-	-
Novel06468	23.1322	121.305	-2.3907	5.01e-11	1.19e-09	-	-
Novel06469	668.969	2109.14	-1.6566	6.09e-13	1.86e-11	-	-
Novel06471	21.81	6.27455	1.7974	0.0099876	0.038737	-	-
Novel06473	84.8722	322.494	-1.9259	4.84e-12	1.33e-10	-	-
Novel06474	12.7858	86.2478	-2.7539	2.86e-09	5.21e-08	-	-
Novel06478	240.82	76.5114	1.6542	1.24e-08	2.06e-07	-	-
Novel06490	69.6511	29.8148	1.2241	0.0023922	0.011692	-	-
Novel06492	54.5034	17.3774	1.6491	0.0091323	0.035896	-	-
Novel06502	237.58	82.7212	1.5221	4.14e-07	5.23e-06	-	-
Novel06516	785.479	425.671	0.88383	0.00020924	0.0014244	-	-
Novel06517	10.2189	0.999043	3.3545	0.0094742	0.03704	-	-
Novel06518	39.4805	9.2296	2.0968	0.00065623	0.0038684	-	-
Novel06519	27.1289	65.4197	-1.2699	0.0016829	0.0087251	-	-
Novel06524	88.5931	21.8642	2.0186	1.56e-06	1.76e-05	-	-
Novel06525	29.6594	7.52082	1.9795	0.003186	0.014896	-	-
Novel06530	36.7067	4.55238	3.0113	1.65e-06	1.85e-05	-	-
Novel06531	169.372	361.835	-1.0951	1.09e-05	0.00010154	-	-
Novel06534	52.2869	3.18535	4.0369	2.27e-08	3.64e-07	-	-
Novel06535	48.0116	4.07922	3.557	1.27e-09	2.46e-08	-	-
Novel06536	266.072	16.8015	3.9852	2.31e-30	3.76e-28	-	-
Novel06537	89.0944	1.36484	6.0285	1.06e-16	5.11e-15	-	-
Novel06541	1667.08	791.714	1.0743	1.46e-06	1.66e-05	-	-
Novel06544	90.6597	7.15065	3.6643	0.0021478	0.010693	-	-
Novel06546	196.283	122.149	0.6843	0.0097655	0.038037	-	-
Novel06547	154.487	743.652	-2.2671	7.33e-05	0.00056073	-	-
Novel06548	333.763	81.423	2.0353	6.12e-13	1.87e-11	-	-
Novel06550	3.13988	15.4102	-2.2951	0.0091507	0.035954	-	-
Novel06552	253.292	71.4716	1.8254	1.32e-09	2.57e-08	-	-
Novel06554	16.0109	0.672585	4.5732	9.31e-05	0.00069364	-	-
Novel06557	18.4438	375.593	-4.348	2.6e-07	3.45e-06	-	-
Novel06558	2432.17	11135	-2.1948	1.14e-22	9.95e-21	-	-
Novel06562	1134.46	2361.24	-1.0575	0.00023774	0.0015955	-	-
Novel06565	65.7319	298.104	-2.1812	1.78e-14	6.6e-13	-	-
Novel06566	1.69246	27.2605	-4.0096	3.72e-07	4.76e-06	-	-
Novel06568	284.393	986.633	-1.7946	0.00029259	0.0019048	-	-
Novel06569	68.397	1278.33	-4.2242	4.42e-26	5.33e-24	-	-
Novel06572	27.5373	9.94181	1.4698	0.0068634	0.028286	-	-
Novel06573	33.0849	0.801802	5.3668	1.21e-09	2.35e-08	-	-
Novel06575	34.3854	12.7614	1.43	0.0041833	0.0188	-	-
Novel06577	3.88858	33.6948	-3.1152	0.00076697	0.0044272	-	-
Novel06578	3.53832	28.3382	-3.0016	1.01e-05	9.46e-05	-	-
Novel06583	63.5077	25.5408	1.3141	0.0037221	0.017025	-	-
Novel06584	145.154	247.49	-0.76979	0.0054431	0.023357	-	-
Novel06586	44.3616	380.366	-3.1	1.1e-26	1.41e-24	-	-
Novel06589	78.2949	20.887	1.9063	0.0023806	0.011643	-	-
Novel06592	5000.77	11913.7	-1.2524	6.35e-09	1.1e-07	-	-
Novel06593	1066.58	1614.72	-0.59829	0.0054155	0.023256	-	-
Novel06594	260.065	152.898	0.7663	0.0036265	0.016661	-	-
Novel06597	10.166	0.652917	3.9607	0.013677	0.049966	-	-
Novel06598	154.02	36.8447	2.0636	1.46e-07	2.02e-06	-	-
Novel06604	91.8535	248.569	-1.4362	2.39e-07	3.2e-06	-	-
Novel06605	50.0473	8.60975	2.5392	1.13e-06	1.31e-05	-	-
Novel06610	110.355	28.4693	1.9547	2.74e-07	3.61e-06	-	-
Novel06611	42.0409	6.57014	2.6778	3.47e-06	3.64e-05	-	-
Novel06620	66.0047	6.7499	3.2896	9.89e-11	2.26e-09	-	-
Novel06621	134.671	267.166	-0.98829	0.00023439	0.0015775	-	-
Novel06628	1.80766	98.4215	-5.7668	9.75e-19	5.9e-17	-	-
Novel06631	42.1725	8.69744	2.2776	3.59e-05	0.00029507	-	-
Novel06635	175.203	91.8298	0.93199	0.001419	0.0075474	-	-
Novel06636	19.0345	2.73187	2.8007	0.0048724	0.021348	-	-
Novel06637	238.856	82.1163	1.5404	1.9e-07	2.58e-06	-	-
Novel06638	326.206	4.64445	6.1341	9.36e-53	6.97e-50	-	-
Novel06641	27.9252	0	Inf	6.27e-10	1.28e-08	-	-
Novel06648	56.8658	25.65	1.1486	0.0066135	0.02748	-	-
Novel06652	2.03037	13.1121	-2.6911	0.0056002	0.023922	-	-
Novel06655	175.14	67.2886	1.3801	7.95e-06	7.7e-05	-	-
Novel06657	38.928	10.3297	1.914	0.00051193	0.0031157	-	-
Novel06658	242.279	46.6548	2.3766	3.76e-15	1.49e-13	-	-
Novel06659	3.30151	28.2199	-3.0955	2.79e-05	0.00023631	-	-
Novel06667	85.3392	280.638	-1.7174	0.013176	0.048422	-	-
Novel06671	20.7692	3.49433	2.5714	0.00080212	0.0046066	-	-
Novel06672	159.978	54.0008	1.5668	3.54e-07	4.56e-06	-	-
Novel06676	513.981	85.3498	2.5903	1.73e-21	1.36e-19	-	-
Novel06678	77.3472	6.79606	3.5086	3.12e-12	8.72e-11	-	-
Novel06680	831.282	1320.49	-0.66766	0.0045039	0.019993	-	-
Novel06683	21.6683	53.7653	-1.3111	0.0034021	0.015747	-	-
Novel06691	609.326	1893.43	-1.6357	2.38e-09	4.41e-08	-	-
Novel06695	224.698	50.1125	2.1647	5.12e-12	1.4e-10	-	-
Novel06696	9.20049	0.652917	3.8167	0.0092194	0.036189	-	-
Novel06698	28.1585	93.777	-1.7357	5.28e-06	5.33e-05	-	-
Novel06701	946.31	4875.01	-2.365	8.1e-05	0.00061193	-	-
Novel06718	10.883	0	Inf	0.00022164	0.0014991	-	-
Novel06719	12.0025	0.692254	4.1159	0.0013854	0.0073996	-	-
Novel06722	11.9796	143.007	-3.5774	1.48e-17	7.86e-16	-	-
Novel06724	2595.13	1157.94	1.1643	4.28e-08	6.57e-07	-	-
Novel06725	244.718	128.671	0.92743	0.0011684	0.0064034	-	-
Novel06728	313.296	167.221	0.90577	0.0012294	0.0066861	-	-
Novel06731	16.4316	2.07676	2.9841	0.006482	0.027045	-	-
Novel06738	58.7723	25.4501	1.2075	0.0043203	0.019318	-	-
Novel06741	203.28	18.0675	3.492	3.05e-18	1.74e-16	-	-
Novel06742	26.3321	6.40158	2.0403	0.0024948	0.012076	-	-
Novel06743	109.685	50.4999	1.119	0.00088798	0.0050333	-	-
Novel06744	79.6842	37.8178	1.0752	0.0048388	0.021217	-	-
Novel06746	281.817	172.901	0.70481	0.0071235	0.02915	-	-
Novel06748	1176.31	690.796	0.76793	0.00053771	0.0032488	-	-
Novel06749	1318.03	305.119	2.1109	1.81e-10	3.99e-09	-	-
Novel06751	116.562	495.288	-2.0872	1.47e-15	6.19e-14	-	-
Novel06759	199.153	1.25748	7.3072	6.22e-13	1.89e-11	-	-
Novel06768	19.6967	1.49406	3.7207	6.36e-05	0.00049316	-	-
Novel06769	37.0182	0	Inf	3.04e-11	7.44e-10	-	-
Novel06770	1106.32	111.579	3.3096	2.66e-31	4.63e-29	-	-
Novel06771	0.277376	14.4308	-5.7012	2.93e-05	0.00024665	-	-
Novel06783	14.6622	96.2814	-2.7152	0.0045406	0.020125	-	-
Novel06784	88.8507	43.3323	1.0359	0.0073513	0.029922	-	-
Novel06790	273.496	136.916	0.99823	0.00019369	0.0013328	-	-
Novel06791	26.5394	4.01803	2.7236	0.00012391	0.00089562	-	-
Novel06818	14.1762	218.476	-3.9459	1.3e-20	9.37e-19	-	-
Novel06819	3.02413	17.0206	-2.4927	0.0021467	0.01069	-	-
Novel06822	220.991	111.511	0.9868	0.00042386	0.0026349	-	-
Novel06824	10116.8	23193.3	-1.197	0.0084448	0.033614	-	-
Novel06825	66.3308	30.5442	1.1188	0.0066081	0.027474	-	-
Novel06827	106.993	3.73993	4.8384	6.06e-05	0.00047205	-	-
Novel06832	30.7436	11.7164	1.3918	0.013267	0.048696	-	-
Novel06837	93.4643	2.92911	4.9959	2.13e-11	5.35e-10	-	-
Novel06838	386.673	152.14	1.3457	5.11e-06	5.17e-05	-	-
Novel06848	25.3201	6.89659	1.8763	0.0046821	0.020658	-	-
Novel06857	1405.1	3882.85	-1.4664	1.4e-07	1.95e-06	-	-
Novel06862	513.294	331.23	0.63195	0.0071459	0.029225	-	-
Novel06872	97.9594	30.2661	1.6945	8.7e-06	8.34e-05	-	-
Novel06873	95.3361	46.763	1.0277	0.0043656	0.019477	-	-
Novel06877	437.01	1030.37	-1.2374	0.00016724	0.0011692	-	-
Novel06878	44.4597	150.318	-1.7575	0.00017423	0.0012112	-	-
Novel06885	74.4987	32.0825	1.2154	0.0019837	0.010012	-	-
Novel06897	134.97	68.9624	0.96876	0.0023551	0.011542	-	-
Novel06898	596.577	3458.04	-2.5352	2.22e-18	1.31e-16	-	-
Novel06900	18.3181	160.74	-3.1334	4.36e-16	1.96e-14	-	-
Novel06901	123.838	60.7119	1.0284	0.0022003	0.010908	-	-
Novel06902	50.9287	2.62232	4.2796	1.62e-11	4.13e-10	-	-
Novel06908	325.446	186.112	0.80625	0.0020144	0.010137	-	-
Novel06909	25.5816	6.30324	2.0209	0.0030046	0.014188	-	-
Novel06915	8.7027	32.7567	-1.9123	0.00098866	0.005532	-	-
Novel06918	40.6863	1457.45	-5.1628	1.1e-12	3.24e-11	-	-
Novel06919	20.1034	3.43314	2.5498	0.0020168	0.010145	-	-
Novel06923	313.569	907.542	-1.5332	1.31e-10	2.96e-09	-	-
Novel06929	93.9305	901.15	-3.2621	0.00061475	0.0036482	-	-
Novel06930	129.3	438.348	-1.7613	6.98e-12	1.87e-10	-	-
Novel06931	22.3665	93.8248	-2.0686	5.39e-08	8.12e-07	-	-
Novel06947	261.09	36.0778	2.8554	2.33e-20	1.64e-18	-	-
Novel06949	511.031	146.247	1.805	3.63e-09	6.51e-08	-	-
Novel06951	1901.97	286.73	2.7297	8.65e-12	2.28e-10	-	-
Novel06955	1685.69	2723.61	-0.69219	0.0011459	0.0062937	-	-
Novel06958	71.6186	148.897	-1.0559	0.0049507	0.02163	-	-
Novel06961	76.2557	211.415	-1.4712	2.91e-07	3.82e-06	-	-
Novel06966	89.1892	45.37	0.97513	0.0080474	0.032268	-	-
Novel06967	5693.38	3127.6	0.86423	0.0041726	0.018761	-	-
Novel06969	204.622	93.9205	1.1234	0.00017311	0.0012042	-	-
Novel06971	21.525	2.73187	2.9781	0.0063055	0.026409	-	-
Novel06978	702.352	128.876	2.4462	8.45e-17	4.1e-15	-	-
Novel06979	26.7727	4.88103	2.4555	0.00039442	0.0024772	-	-
Novel06980	64.4432	5.48121	3.5555	2.2e-11	5.5e-10	-	-
Novel06981	92.9319	49.703	0.90284	0.0076474	0.030914	-	-
Novel06982	46.1604	11.9727	1.9469	0.00014417	0.0010253	-	-
Novel06983	33.696	12.0557	1.4829	0.0076804	0.031025	-	-
Novel06984	1202.45	2479.71	-1.0442	0.00033175	0.0021246	-	-
Novel06987	74.3289	5.38068	3.7881	6.64e-13	2.02e-11	-	-
Novel06991	0	10.954	#NAME?	7.3e-05	0.00055928	-	-
Novel06992	0	5.31485	#NAME?	0.012478	0.04631	-	-
Novel06993	0	47.7197	#NAME?	2.48e-17	1.28e-15	-	-
Novel06998	4.05076	139.388	-5.1048	5.72e-29	8.57e-27	-	-
Novel07001	24.8165	0.346127	6.1639	5.11e-08	7.75e-07	-	-
Novel07003	70.4522	19.7525	1.8346	1.72e-05	0.000153	-	-
Novel07006	2653.02	890.509	1.5749	1.55e-12	4.49e-11	-	-
Novel07012	4.81769	19.1124	-1.9881	0.0082937	0.033106	-	-
Novel07017	1609.32	4044.1	-1.3294	1.58e-09	3.02e-08	-	-
Novel07019	143.042	29.4331	2.2809	4.41e-08	6.75e-07	-	-
Novel07020	265.261	93.1309	1.5101	1.17e-07	1.65e-06	-	-
Novel07022	47.8528	13.9355	1.7798	0.0016514	0.008595	-	-
Novel07024	6.88917	0	Inf	0.0049681	0.021694	-	-
Novel07026	330.55	740.094	-1.1628	1.91e-06	2.11e-05	-	-
Novel07035	138.27	236.54	-0.7746	0.0037708	0.017192	-	-
Novel07040	60.778	2.27838	4.7375	6.45e-15	2.5e-13	-	-
Novel07041	38.8599	1.49406	4.701	2.89e-08	4.55e-07	-	-
Novel07043	404.107	157.062	1.3634	4.62e-07	5.79e-06	-	-
Novel07044	529.778	807.229	-0.60759	0.0073221	0.029816	-	-
Novel07047	63.4812	676.77	-3.4143	1.03e-20	7.51e-19	-	-
Novel07050	2.00628	27.0701	-3.7541	1.13e-05	0.00010432	-	-
Novel07051	484.272	1045.6	-1.1104	1.21e-06	1.39e-05	-	-
Novel07052	112.856	14.3674	2.9736	5.61e-12	1.52e-10	-	-
Novel07054	47.7787	13.4864	1.8249	0.00020344	0.0013907	-	-
Novel07064	1071.15	1905.52	-0.83103	0.00019795	0.0013574	-	-
Novel07065	49.5512	209.233	-2.0781	9.95e-12	2.6e-10	-	-
Novel07066	31.5898	104.252	-1.7225	2.46e-06	2.65e-05	-	-
Novel07069	19.2636	55.011	-1.5138	0.00092225	0.0052046	-	-
Novel07070	423.407	690.211	-0.70499	0.0045244	0.020063	-	-
Novel07077	60.3572	1.36484	5.4667	2.06e-15	8.49e-14	-	-
Novel07095	35.3486	5.40035	2.7105	2.81e-05	0.00023777	-	-
Novel07111	115.702	54.9955	1.073	0.00099923	0.0055845	-	-
Novel07114	300.817	144.979	1.053	0.00015546	0.0010965	-	-
Novel07116	41.0184	185.954	-2.1806	0.007877	0.031675	-	-
Novel07124	125.104	260.38	-1.0575	6.26e-05	0.00048644	-	-
Novel07125	157.842	305.212	-0.95133	0.0003877	0.0024399	-	-
Novel07127	692.501	259.606	1.4155	1.61e-08	2.64e-07	-	-
Novel07138	7.44979	0	Inf	0.003139	0.014709	-	-
Novel07141	3618.43	8848.42	-1.2901	3.64e-09	6.53e-08	-	-
Novel07143	7.97579	0	Inf	0.0022424	0.011074	-	-
Novel07147	252.5	822.695	-1.7041	0.0005753	0.0034436	-	-
Novel07148	46.1928	14.3349	1.6881	0.0012808	0.0069176	-	-
Novel07151	31.5211	1.58394	4.3147	4.25e-08	6.54e-07	-	-
Novel07153	529.409	804.901	-0.60443	0.0070622	0.028945	-	-
Novel07159	21.2458	3.65005	2.5412	0.0016854	0.0087349	-	-
Novel07160	13.7331	2.1273	2.6906	0.0069901	0.028708	-	-
Novel07168	57.7645	124.296	-1.1055	0.010275	0.039661	-	-
Novel07170	47.4486	342.841	-2.8531	9.55e-08	1.38e-06	-	-
Novel07175	128.338	3731.34	-4.8617	4e-37	1.17e-34	-	-
Novel07177	44.2688	1032.55	-4.5438	4.18e-59	4.74e-56	-	-
Novel07179	486.459	246.99	0.97787	2.96e-05	0.00024902	-	-
Novel07182	237.739	87.5784	1.4407	9.14e-05	0.00068202	-	-
Novel07185	117.03	46.7545	1.3237	0.00013694	0.00097837	-	-
Novel07192	80.0409	150.566	-0.91158	0.0030566	0.014385	-	-
Novel07193	21.3751	53.6202	-1.3268	0.0017484	0.0090023	-	-
Novel07195	1416.85	883.083	0.68207	0.0058237	0.024672	-	-
Novel07196	973.732	367.06	1.4075	3.8e-09	6.8e-08	-	-
Novel07197	44.3128	8.66248	2.3549	6.25e-06	6.22e-05	-	-
Novel07198	29.1281	58.76	-1.0124	0.012465	0.046284	-	-
Novel07199	66.2837	11.0438	2.5854	6.43e-06	6.37e-05	-	-
Novel07201	133.818	66.7761	1.0029	0.0068156	0.028121	-	-
Novel07207	89.3056	36.3125	1.2983	0.00060853	0.0036143	-	-
Novel07208	292.828	53.6134	2.4494	1.55e-16	7.32e-15	-	-
Novel07210	40.48	12.0866	1.7438	0.0023284	0.011435	-	-
Novel07214	2.34419	22.848	-3.2849	2.87e-05	0.00024238	-	-
Novel07220	23.3079	5.11542	2.1879	0.0020098	0.010122	-	-
Novel07227	82.7243	27.4949	1.5891	8.57e-05	0.00064393	-	-
Novel07230	80.7891	14.1505	2.5133	8.02e-09	1.37e-07	-	-
Novel07243	20.614	45.606	-1.1456	0.0107	0.040989	-	-
Novel07244	1.78944	11.6113	-2.6979	0.011565	0.043618	-	-
Novel07247	515.006	866.687	-0.75092	0.001205	0.0065788	-	-
Novel07254	47.686	2.14916	4.4717	2.23e-11	5.57e-10	-	-
Novel07255	15.8469	2.49529	2.6669	0.0019537	0.0098953	-	-
Novel07257	131.939	344.578	-1.385	2.16e-07	2.91e-06	-	-
Novel07258	58.8721	22.2016	1.4069	0.00067726	0.00397	-	-
Novel07261	84.5848	40.1423	1.0753	0.0046232	0.020434	-	-
Novel07265	3733.66	2357.9	0.66309	0.0030596	0.014397	-	-
Novel07267	4.95577	28.7278	-2.5353	0.010112	0.03916	-	-
Novel07269	79.1495	28.295	1.484	0.0003628	0.0023011	-	-
Novel07280	40.5718	13.8066	1.5551	0.0021064	0.010535	-	-
Novel07282	17.0082	119.842	-2.8168	2.09e-13	6.74e-12	-	-
Novel07290	43.2256	111.585	-1.3682	4.91e-05	0.00039082	-	-
Novel07291	54.6827	157.858	-1.5295	6.77e-07	8.2e-06	-	-
Novel07292	301.846	119.321	1.339	1.6e-06	1.8e-05	-	-
Novel07293	192.096	39.408	2.2853	2.81e-12	7.91e-11	-	-
Novel07295	8.38713	29.0982	-1.7947	0.0035141	0.016208	-	-
Novel07297	11.3566	62.1024	-2.4511	1.2e-07	1.69e-06	-	-
Novel07298	40.9079	12.6059	1.6983	0.0033609	0.01559	-	-
Novel07301	140.891	29.9967	2.2317	3.16e-05	0.00026386	-	-
Novel07310	49.0706	21.3826	1.1984	0.011806	0.044321	-	-
Novel07315	224.158	80.1046	1.4846	3.44e-07	4.43e-06	-	-
Novel07321	148.667	4.29613	5.1129	8.26e-29	1.23e-26	-	-
Novel07327	257.263	951.119	-1.8864	0.0070991	0.029063	-	-
Novel07330	17.5442	1.12826	3.9588	0.00020058	0.0013741	-	-
Novel07338	185.341	366.319	-0.98292	0.00015868	0.0011159	-	-
Novel07356	43.312	91.1293	-1.0731	0.0018342	0.0093707	-	-
Novel07366	1077.83	472.668	1.1892	6.2e-07	7.54e-06	-	-
Novel07371	70.0248	12.1237	2.53	2.15e-08	3.44e-07	-	-
Novel07372	449.639	286.307	0.6512	0.010274	0.039661	-	-
Novel07377	0	19.7547	#NAME?	4.8e-08	7.3e-07	-	-
Novel07382	41.4885	10.6562	1.961	0.00031654	0.0020369	-	-
Novel07386	70.5915	2.01776	5.1287	2.78e-13	8.84e-12	-	-
Novel07396	293.036	662.153	-1.1761	6.33e-07	7.68e-06	-	-
Novel07397	15.8646	78.1554	-2.3005	0.00024276	0.0016228	-	-
Novel07406	522.212	2742.47	-2.3928	7.32e-05	0.00056	-	-
Novel07410	430.635	1441.7	-1.7432	0.00077711	0.0044793	-	-
Novel07412	12.6377	1.23781	3.3519	0.0020666	0.010363	-	-
Novel07413	19.3547	0.326458	5.8896	2.47e-06	2.66e-05	-	-
Novel07417	96.8348	12.0822	3.0026	6.49e-08	9.65e-07	-	-
Novel07418	81.2451	33.9953	1.2569	0.0016541	0.0086072	-	-
Novel07421	55.6894	138.083	-1.3101	0.0025316	0.012232	-	-
Novel07425	324.313	489.993	-0.59537	0.011473	0.043339	-	-
Novel07431	433.127	843.187	-0.96106	0.00046636	0.0028657	-	-
Novel07432	40.8597	13.6774	1.5789	0.0018328	0.0093649	-	-
Novel07433	79.9099	190.902	-1.2564	1.61e-05	0.00014384	-	-
Novel07434	87.2436	708.127	-3.0209	9.22e-18	5.06e-16	-	-
Novel07451	1.74301	39.0556	-4.4859	1.89e-10	4.14e-09	-	-
Novel07453	1137.12	693.327	0.71377	0.0012108	0.0066053	-	-
Novel07454	20.5553	2.83923	2.8559	0.00053441	0.0032324	-	-
Novel07455	44.7147	18.7422	1.2545	0.0071509	0.029236	-	-
Novel07457	18.0666	71.8828	-1.9923	9.28e-07	1.1e-05	-	-
Novel07460	17.4865	2.71001	2.6899	0.0027104	0.01298	-	-
Novel07461	181.932	53.9781	1.753	3.72e-08	5.78e-07	-	-
Novel07467	11.4983	0	Inf	0.00013815	0.00098578	-	-
Novel07468	1131.02	6277.05	-2.4725	3.09e-27	4.1e-25	-	-
Novel07470	44.8117	10.8507	2.0461	0.0028715	0.013641	-	-
Novel07471	443.414	125.578	1.8201	9.15e-06	8.71e-05	-	-
Novel07472	18.1829	3.60169	2.3358	0.0042034	0.018882	-	-
Novel07490	0.29148	8.05792	-4.7889	0.0045814	0.02029	-	-
Novel07495	5300.85	3347.74	0.66303	0.0016642	0.0086411	-	-
Novel07500	26.7916	3.91694	2.774	0.00012657	0.00091228	-	-
Novel07502	349.005	1062.77	-1.6065	0.0056459	0.024084	-	-
Novel07506	965.578	473.662	1.0275	1.65e-05	0.00014748	-	-
Novel07507	20.5676	5.27332	1.9636	0.0086076	0.034176	-	-
Novel07508	520.771	196.668	1.4049	7.16e-09	1.23e-07	-	-
Novel07515	96.8242	23.8355	2.0223	1.93e-06	2.13e-05	-	-
Novel07520	33.7624	10.7196	1.6552	0.0020048	0.010102	-	-
Novel07532	124.767	258.242	-1.0495	0.0060326	0.025398	-	-
Novel07544	39.5368	11.217	1.8175	0.0012862	0.0069431	-	-
Novel07548	80.5488	40.7556	0.98286	0.0069331	0.028515	-	-
Novel07551	90.4405	629.761	-2.7998	1.8e-06	2e-05	-	-
Novel07553	367.099	172.517	1.0894	0.00091292	0.0051561	-	-
Novel07556	44.271	8.27264	2.4199	9.69e-06	9.15e-05	-	-
Novel07559	43.4854	110.315	-1.343	0.010418	0.040115	-	-
Novel07568	44.0519	360.286	-3.0319	7.35e-17	3.59e-15	-	-
Novel07575	12.0271	1.82051	2.7239	0.0096166	0.037514	-	-
Novel07578	27.5878	57.4801	-1.059	0.012953	0.047772	-	-
Novel07580	6.30796	20.6769	-1.7128	0.010792	0.041286	-	-
[truncated: 5,754 more rows]
