# Supplementary material for: Technology Invention and Mechanism Analysis of Rapid Rooting of Taxus × media Rehder Branches Induced by Agrobacterium rhizogenes
Source: Int J Mol Sci. 2023 Dec 27;25(1):375. doi: 10.3390/ijms25010375 (PMC10779043; doi:10.3390/ijms25010375)
Supplement: Supplementary file 1 [file ijms-25-00375-s001.zip › Table S3. The downregulated GO terms in DEGs of TRvsWR.xlsx]

## Sheet: Table S3 The downregulated GO t
Title: Technology Invention and Mechanism Analysis of Rapid Rooting of Taxus media Branches Induced by Agrobacterium rhizogenes
Authors: Ying Wang, Xiumei Luo, Haotian Su, Ge Guan, Shuang Liu, Maozhi Ren
Supplementary Table S3. The downregulated GO terms in DEGs of TR vs WR.
GO_accession	Description	Term_type	Over_represented_pValue	Corrected_pValue	DEG_item	DEG_list	Bg_item	Bg_list	Gene_names
GO:0016757	transferase activity, transferring glycosyl groups	molecular_function	1.19e-09	3.17e-06	115	2561	558	24160	gene-KI387_014673,gene-KI387_024921,gene-KI387_003051,gene-KI387_014677,gene-KI387_034241,gene-KI387_033209,gene-KI387_014966,gene-KI387_018726,gene-KI387_001375,gene-KI387_022221,gene-KI387_014123,gene-KI387_014964,gene-KI387_017643,Novel07247,Novel01958,gene-KI387_000177,gene-KI387_024037,gene-KI387_026906,gene-KI387_020982,gene-KI387_019070,gene-KI387_035919,gene-KI387_026909,gene-KI387_027552…
GO:0016020	membrane	cellular_component	2.21e-09	3.17e-06	575	2561	4231	24160	gene-KI387_037885,gene-KI387_022201,gene-KI387_044328,Novel02634,gene-KI387_007858,gene-KI387_028598,gene-KI387_012630,gene-KI387_010745,gene-KI387_021358,gene-KI387_035431,gene-KI387_012026,gene-KI387_019418,gene-KI387_021633,gene-KI387_000985,gene-KI387_033410,gene-KI387_005516,Novel06134,gene-KI387_009130,gene-KI387_026365,gene-KI387_007981,gene-KI387_004317,gene-KI387_015497,gene-KI387_004972…
GO:0031224	intrinsic component of membrane	cellular_component	2.83e-09	3.17e-06	306	2561	2049	24160	gene-KI387_021982,gene-KI387_028849,gene-KI387_024927,gene-KI387_005377,gene-KI387_019525,Novel01428,gene-KI387_005794,gene-KI387_004972,gene-KI387_024259,Novel03705,gene-KI387_035477,gene-KI387_002400,gene-KI387_034693,gene-KI387_007805,gene-KI387_034601,gene-KI387_037077,gene-KI387_027652,Novel07044,gene-KI387_032850,gene-KI387_038038,gene-KI387_015029,gene-KI387_012587,Novel02701,gene-KI387_02…
GO:0016491	oxidoreductase activity	molecular_function	3.06e-09	3.17e-06	409	2561	2896	24160	gene-KI387_009544,gene-KI387_013958,Novel06565,gene-KI387_022835,gene-KI387_034016,gene-KI387_015265,gene-KI387_038498,Novel07421,gene-KI387_043902,gene-KI387_035541,gene-KI387_031855,gene-KI387_002431,gene-KI387_001249,gene-KI387_031172,Novel01758,gene-KI387_011850,gene-KI387_039793,gene-KI387_019920,gene-KI387_000275,gene-KI387_011705,Novel00251,gene-KI387_037149,gene-KI387_023090,gene-KI387_01…
GO:0016021	integral component of membrane	cellular_component	3.33e-09	3.17e-06	304	2561	2037	24160	gene-KI387_014504,gene-KI387_007137,gene-KI387_010752,gene-KI387_013254,gene-KI387_001400,gene-KI387_000104,gene-KI387_006777,Novel00564,gene-KI387_030234,gene-KI387_009785,gene-KI387_012774,Novel04952,Novel01469,gene-KI387_022548,gene-KI387_038717,gene-KI387_039694,gene-KI387_034993,gene-KI387_028472,gene-KI387_001098,gene-KI387_001586,gene-KI387_003185,gene-KI387_032617,gene-KI387_009818,gene-K…
GO:0003700	DNA-binding transcription factor activity	molecular_function	6.81e-09	5.39e-06	108	2561	599	24160	gene-KI387_043193,gene-KI387_010311,gene-KI387_039861,gene-KI387_018974,Novel01986,Novel05555,gene-KI387_032181,gene-KI387_003374,gene-KI387_010307,gene-KI387_029193,gene-KI387_035418,gene-KI387_025413,gene-KI387_020391,gene-KI387_027969,gene-KI387_030920,gene-KI387_027652,gene-KI387_001400,gene-KI387_010321,gene-KI387_011882,gene-KI387_010320,Novel06991,gene-KI387_017370,gene-KI387_010322,gene-K…
GO:0008152	metabolic process	biological_process	3.73e-08	2.53e-05	1420	2561	11893	24160	Novel07451,gene-KI387_013881,gene-KI387_007975,gene-KI387_016576,gene-KI387_016961,Novel00603,gene-KI387_038844,gene-KI387_027969,gene-KI387_034660,Novel03011,gene-KI387_034693,gene-KI387_035693,gene-KI387_035685,gene-KI387_026041,gene-KI387_010870,Novel07267,gene-KI387_018377,gene-KI387_034054,gene-KI387_026298,gene-KI387_023163,gene-KI387_017715,Novel01428,Novel07050,gene-KI387_000179,gene-KI38…
GO:0005975	carbohydrate metabolic process	biological_process	5.23e-08	3.1e-05	175	2561	1060	24160	gene-KI387_006423,gene-KI387_019569,Novel02377,gene-KI387_030637,gene-KI387_011785,gene-KI387_005268,gene-KI387_014585,gene-KI387_013150,gene-KI387_020581,gene-KI387_001130,gene-KI387_032432,gene-KI387_031071,gene-KI387_019059,gene-KI387_006097,gene-KI387_014584,gene-KI387_014678,gene-KI387_015030,gene-KI387_013263,Novel06818,gene-KI387_018403,gene-KI387_006250,Novel01099,gene-KI387_028997,gene-K…
GO:0003824	catalytic activity	molecular_function	1.48e-07	7.8e-05	1447	2561	12101	24160	gene-KI387_015265,gene-KI387_022835,gene-KI387_039023,gene-KI387_000810,gene-KI387_022601,gene-KI387_013958,Novel02718,Novel00621,gene-KI387_031140,gene-KI387_018508,Novel01875,gene-KI387_028017,Novel01505,gene-KI387_024158,gene-KI387_031855,gene-KI387_040884,gene-KI387_011971,gene-KI387_005154,Novel00251,gene-KI387_037240,gene-KI387_042153,gene-KI387_002454,gene-KI387_019920,Novel03806,gene-KI38…
GO:0009415	response to water	biological_process	3.11e-07	0.00014776	15	2561	35	24160	Novel03759,Novel03760,Novel04081,gene-KI387_021982,gene-KI387_025064,gene-KI387_021939,gene-KI387_021981,gene-KI387_021972,gene-KI387_021973,gene-KI387_021941,Novel03749,gene-KI387_021979,gene-KI387_021980,Novel03745,Novel03765
GO:0004553	hydrolase activity, hydrolyzing O-glycosyl compounds	molecular_function	5.47e-07	0.00019691	102	2561	580	24160	gene-KI387_035280,gene-KI387_016982,Novel00363,gene-KI387_037140,gene-KI387_035939,gene-KI387_016721,gene-KI387_014680,gene-KI387_002270,Novel05913,gene-KI387_018402,gene-KI387_029619,gene-KI387_022407,gene-KI387_037651,gene-KI387_034213,gene-KI387_014677,gene-KI387_034241,gene-KI387_030069,Novel03474,gene-KI387_028696,gene-KI387_019578,gene-KI387_014673,gene-KI387_018344,gene-KI387_029065,gene-K…
GO:0001101	response to acid chemical	biological_process	5.62e-07	0.00019691	15	2561	36	24160	gene-KI387_021972,gene-KI387_021981,gene-KI387_021939,gene-KI387_025064,gene-KI387_021982,Novel04081,Novel03760,Novel03759,Novel03765,Novel03745,gene-KI387_021980,gene-KI387_021979,gene-KI387_021941,Novel03749,gene-KI387_021973
GO:0055114	oxidation-reduction process	biological_process	5.79e-07	0.00019691	381	2561	2784	24160	gene-KI387_003087,gene-KI387_014374,Novel07612,gene-KI387_039188,gene-KI387_010354,Novel04961,gene-KI387_034062,gene-KI387_033096,gene-KI387_037231,gene-KI387_012137,gene-KI387_027502,gene-KI387_012135,gene-KI387_000759,gene-KI387_018583,gene-KI387_014367,gene-KI387_001183,gene-KI387_033100,gene-KI387_004770,Novel03602,gene-KI387_024709,gene-KI387_016009,gene-KI387_016280,gene-KI387_021598,gene-K…
GO:0008150	biological_process	biological_process	5.81e-07	0.00019691	1854	2561	16290	24160	gene-KI387_009131,gene-KI387_005464,gene-KI387_027752,gene-KI387_010390,gene-KI387_030611,gene-KI387_033209,Novel03397,gene-KI387_023184,gene-KI387_035141,gene-KI387_020058,gene-KI387_001390,gene-KI387_029199,gene-KI387_017643,gene-KI387_000729,gene-KI387_035508,gene-KI387_004881,gene-KI387_001882,gene-KI387_037892,gene-KI387_022851,gene-KI387_023138,gene-KI387_035361,gene-KI387_020629,gene-KI387…
GO:0140110	transcription regulator activity	molecular_function	6.3e-07	0.00019927	119	2561	742	24160	gene-KI387_036653,gene-KI387_024908,gene-KI387_035593,gene-KI387_030918,gene-KI387_029546,gene-KI387_010310,Novel00594,gene-KI387_037606,gene-KI387_032179,gene-KI387_020044,gene-KI387_008908,gene-KI387_024907,gene-KI387_001399,gene-KI387_008084,Novel02253,gene-KI387_028824,gene-KI387_007502,gene-KI387_039689,gene-KI387_028819,gene-KI387_036306,gene-KI387_035413,gene-KI387_002877,gene-KI387_010305…
GO:0016798	hydrolase activity, acting on glycosyl bonds	molecular_function	1.34e-06	0.00039788	107	2561	624	24160	gene-KI387_014194,gene-KI387_015225,gene-KI387_003590,gene-KI387_023250,gene-KI387_037139,gene-KI387_020444,gene-KI387_037849,gene-KI387_014674,gene-KI387_001535,gene-KI387_010587,gene-KI387_009908,gene-KI387_014528,gene-KI387_025911,gene-KI387_001129,Novel03071,gene-KI387_019911,gene-KI387_003599,gene-KI387_016861,gene-KI387_009152,gene-KI387_015511,gene-KI387_019058,gene-KI387_015324,gene-KI387…
GO:1901135	carbohydrate derivative metabolic process	biological_process	2.75e-06	0.00076847	101	2561	587	24160	Novel05537,gene-KI387_012882,Novel00407,gene-KI387_000104,gene-KI387_012774,gene-KI387_034693,gene-KI387_008557,gene-KI387_043267,gene-KI387_028236,gene-KI387_014525,Novel03789,gene-KI387_024637,gene-KI387_036098,gene-KI387_026411,gene-KI387_032162,gene-KI387_022548,gene-KI387_014965,Novel05783,Novel01219,gene-KI387_032152,gene-KI387_009034,Novel05342,gene-KI387_037854,gene-KI387_014383,gene-KI38…
GO:0006629	lipid metabolic process	biological_process	5.87e-06	0.0015491	137	2561	833	24160	gene-KI387_018062,gene-KI387_026321,gene-KI387_032084,gene-KI387_020865,gene-KI387_037648,gene-KI387_026242,gene-KI387_000104,gene-KI387_019812,gene-KI387_025440,gene-KI387_035215,gene-KI387_031041,gene-KI387_000447,gene-KI387_036098,gene-KI387_039339,gene-KI387_029882,gene-KI387_004306,gene-KI387_013578,gene-KI387_038064,gene-KI387_010492,Novel07580,gene-KI387_010386,gene-KI387_033785,gene-KI387…
GO:0020037	heme binding	molecular_function	6.91e-06	0.0017272	126	2561	757	24160	Novel00275,gene-KI387_002440,gene-KI387_009540,gene-KI387_039279,gene-KI387_023163,gene-KI387_026041,Novel02843,gene-KI387_023160,Novel03011,gene-KI387_022594,gene-KI387_013916,gene-KI387_016003,gene-KI387_040360,gene-KI387_034660,gene-KI387_014551,Novel00234,gene-KI387_030701,gene-KI387_026055,Novel03060,Novel03095,gene-KI387_023159,gene-KI387_023131,gene-KI387_028576,gene-KI387_028805,gene-KI38…
GO:0046906	tetrapyrrole binding	molecular_function	1.91e-05	0.0045308	127	2561	779	24160	gene-KI387_017733,gene-KI387_028598,gene-KI387_028567,gene-KI387_015352,gene-KI387_016002,gene-KI387_042919,gene-KI387_028001,gene-KI387_029490,Novel05434,gene-KI387_031198,gene-KI387_024864,gene-KI387_028800,gene-KI387_028564,gene-KI387_023165,gene-KI387_024865,gene-KI387_009991,gene-KI387_031200,gene-KI387_041419,gene-KI387_016507,gene-KI387_002492,gene-KI387_016005,gene-KI387_015266,gene-KI387…
GO:0016740	transferase activity	molecular_function	2.14e-05	0.0047775	549	2561	4065	24160	Novel01085,gene-KI387_031081,gene-KI387_018062,gene-KI387_027922,gene-KI387_014383,gene-KI387_037648,Novel01482,gene-KI387_000859,gene-KI387_006187,gene-KI387_031951,gene-KI387_028521,Novel05349,gene-KI387_012577,gene-KI387_032328,Novel04609,Novel05049,Novel04702,gene-KI387_036981,gene-KI387_038051,gene-KI387_026411,gene-KI387_031012,gene-KI387_021890,Novel06020,gene-KI387_031765,gene-KI387_01905…
GO:0043565	sequence-specific DNA binding	molecular_function	2.24e-05	0.0047775	43	2561	214	24160	gene-KI387_012620,gene-KI387_033785,Novel03801,Novel04888,gene-KI387_030918,gene-KI387_001795,Novel04876,gene-KI387_030919,Novel00152,gene-KI387_003007,gene-KI387_039280,gene-KI387_032427,gene-KI387_034799,gene-KI387_036653,gene-KI387_027583,gene-KI387_011998,gene-KI387_016849,gene-KI387_000711,gene-KI387_030922,gene-KI387_030933,gene-KI387_003367,gene-KI387_007748,gene-KI387_003389,gene-KI387_02…
GO:0009628	response to abiotic stimulus	biological_process	2.37e-05	0.0047775	16	2561	50	24160	gene-KI387_025064,gene-KI387_021982,gene-KI387_021972,Novel03759,Novel03760,Novel04081,gene-KI387_021979,gene-KI387_021980,gene-KI387_021941,Novel03749,gene-KI387_021973,gene-KI387_021981,gene-KI387_021939,Novel03765,Novel03745,gene-KI387_002187
GO:0010035	response to inorganic substance	biological_process	2.41e-05	0.0047775	21	2561	79	24160	gene-KI387_021982,gene-KI387_025064,Novel01113,gene-KI387_014584,Novel00336,gene-KI387_021972,Novel03759,Novel04081,Novel03760,gene-KI387_021979,gene-KI387_021980,gene-KI387_021973,Novel03749,gene-KI387_021941,gene-KI387_034734,gene-KI387_021939,gene-KI387_021981,gene-KI387_028330,gene-KI387_013144,Novel03745,Novel03765
GO:0016758	transferase activity, transferring hexosyl groups	molecular_function	2.59e-05	0.0049123	73	2561	377	24160	gene-KI387_000177,gene-KI387_022221,gene-KI387_014123,gene-KI387_018726,gene-KI387_034241,gene-KI387_014677,gene-KI387_014673,gene-KI387_024921,gene-KI387_025580,gene-KI387_013573,Novel07327,gene-KI387_009036,gene-KI387_026909,gene-KI387_018728,gene-KI387_027552,gene-KI387_019070,gene-KI387_026906,gene-KI387_034380,gene-KI387_032303,gene-KI387_014674,gene-KI387_024533,gene-KI387_021402,gene-KI387…
GO:0005509	calcium ion binding	molecular_function	2.89e-05	0.005283	46	2561	228	24160	gene-KI387_022659,gene-KI387_031266,gene-KI387_033208,gene-KI387_019578,gene-KI387_022340,gene-KI387_018261,gene-KI387_035499,gene-KI387_016618,Novel03474,gene-KI387_018583,Novel01863,gene-KI387_037077,gene-KI387_017242,gene-KI387_035502,gene-KI387_015549,gene-KI387_002346,gene-KI387_020429,gene-KI387_028454,gene-KI387_038962,gene-KI387_035939,gene-KI387_016733,Novel03375,gene-KI387_017268,gene-K…
GO:0070085	glycosylation	biological_process	3.77e-05	0.006632	34	2561	140	24160	Novel01535,Novel00309,Novel01875,gene-KI387_018508,Novel06334,gene-KI387_016284,gene-KI387_014419,gene-KI387_014961,gene-KI387_034468,gene-KI387_030057,gene-KI387_024632,gene-KI387_019863,Novel01873,gene-KI387_029496,gene-KI387_007414,gene-KI387_019153,gene-KI387_037892,Novel05783,gene-KI387_022548,gene-KI387_014965,gene-KI387_026411,gene-KI387_031514,gene-KI387_024637,gene-KI387_014579,gene-KI38…
GO:0006464	cellular protein modification process	biological_process	5.94e-05	0.0097258	257	2561	1733	24160	gene-KI387_014859,gene-KI387_007414,gene-KI387_000872,Novel00600,Novel04355,Novel05145,Novel00871,gene-KI387_012786,gene-KI387_022269,gene-KI387_023125,gene-KI387_001046,Novel03073,Novel00894,Novel02859,Novel03382,gene-KI387_016284,gene-KI387_041618,gene-KI387_007771,gene-KI387_018507,gene-KI387_034370,gene-KI387_043984,gene-KI387_037854,Novel01064,gene-KI387_023862,gene-KI387_038865,Novel05783,g…
GO:0036211	protein modification process	biological_process	5.94e-05	0.0097258	257	2561	1733	24160	gene-KI387_023125,gene-KI387_001046,Novel03073,Novel00894,Novel02859,Novel03382,gene-KI387_016284,gene-KI387_041618,gene-KI387_014859,gene-KI387_007414,gene-KI387_000872,Novel00600,Novel04355,Novel05145,Novel00871,gene-KI387_012786,gene-KI387_022269,Novel05783,gene-KI387_039127,gene-KI387_020614,gene-KI387_024149,gene-KI387_013874,gene-KI387_007771,gene-KI387_018507,gene-KI387_034370,gene-KI387_0…
GO:0008610	lipid biosynthetic process	biological_process	6.56e-05	0.010386	79	2561	459	24160	gene-KI387_039339,Novel03789,gene-KI387_007805,gene-KI387_026390,gene-KI387_034693,gene-KI387_027480,gene-KI387_002400,gene-KI387_000104,gene-KI387_026242,gene-KI387_016961,gene-KI387_037648,gene-KI387_035649,gene-KI387_036183,gene-KI387_009034,gene-KI387_037854,gene-KI387_023862,gene-KI387_016183,gene-KI387_039689,gene-KI387_026868,gene-KI387_015030,gene-KI387_006250,Novel06818,Novel00755,Novel0…
GO:0003735	structural constituent of ribosome	molecular_function	8.6e-05	0.012869	72	2561	469	24160	gene-KI387_013619,Novel05671,gene-KI387_000729,Novel04289,gene-KI387_019562,gene-KI387_034017,gene-KI387_043374,gene-KI387_010795,gene-KI387_003362,gene-KI387_006570,gene-KI387_019123,gene-KI387_037723,gene-KI387_007443,gene-KI387_032632,gene-KI387_013382,gene-KI387_035361,gene-KI387_022871,gene-KI387_004305,gene-KI387_031270,gene-KI387_030155,gene-KI387_000263,Novel00446,Novel05459,gene-KI387_03…
GO:0016614	oxidoreductase activity, acting on CH-OH group of donors	molecular_function	8.67e-05	0.012869	72	2561	392	24160	gene-KI387_013957,gene-KI387_011918,gene-KI387_005106,gene-KI387_014136,gene-KI387_003087,gene-KI387_034062,gene-KI387_037150,gene-KI387_037231,gene-KI387_039188,gene-KI387_025615,gene-KI387_010080,Novel05617,gene-KI387_034063,gene-KI387_034017,gene-KI387_023184,gene-KI387_030645,gene-KI387_035653,Novel06568,Novel01758,gene-KI387_021598,gene-KI387_034060,gene-KI387_035541,Novel02919,gene-KI387_03…
GO:0110165	cellular anatomical entity	cellular_component	0.00010003	0.014393	913	2561	7726	24160	gene-KI387_010589,gene-KI387_036274,Novel02668,gene-KI387_037158,gene-KI387_029519,gene-KI387_027900,gene-KI387_034008,gene-KI387_001584,gene-KI387_026883,gene-KI387_016545,gene-KI387_035314,gene-KI387_030451,gene-KI387_024258,gene-KI387_040523,gene-KI387_026888,gene-KI387_020224,gene-KI387_007245,gene-KI387_028938,gene-KI387_024898,Novel03092,gene-KI387_028812,gene-KI387_016745,gene-KI387_026449…
GO:0006486	protein glycosylation	biological_process	0.00010962	0.014402	27	2561	109	24160	gene-KI387_014961,gene-KI387_035919,gene-KI387_016284,Novel06334,gene-KI387_014579,gene-KI387_026411,gene-KI387_031514,gene-KI387_024637,Novel05783,Novel00309,gene-KI387_014965,gene-KI387_022548,Novel01535,gene-KI387_037892,Novel07247,gene-KI387_007414,gene-KI387_019153,gene-KI387_014964,gene-KI387_017643,gene-KI387_014123,gene-KI387_022221,gene-KI387_014966,gene-KI387_029496,gene-KI387_033209,ge…
GO:0009101	glycoprotein biosynthetic process	biological_process	0.00010962	0.014402	27	2561	109	24160	gene-KI387_014961,gene-KI387_016284,gene-KI387_035919,gene-KI387_024637,gene-KI387_026411,gene-KI387_031514,gene-KI387_014579,Novel06334,gene-KI387_037892,Novel01535,gene-KI387_022548,gene-KI387_014965,Novel05783,Novel00309,gene-KI387_014964,gene-KI387_017643,gene-KI387_019153,Novel07247,gene-KI387_007414,gene-KI387_022221,gene-KI387_014123,gene-KI387_033209,gene-KI387_014966,gene-KI387_029496,ge…
GO:0043413	macromolecule glycosylation	biological_process	0.00010962	0.014402	27	2561	109	24160	gene-KI387_014123,gene-KI387_022221,gene-KI387_019153,Novel07247,gene-KI387_007414,gene-KI387_017643,gene-KI387_014964,gene-KI387_034468,gene-KI387_030057,gene-KI387_024632,gene-KI387_029496,gene-KI387_014966,gene-KI387_033209,gene-KI387_035919,gene-KI387_016284,gene-KI387_014961,Novel00309,Novel05783,gene-KI387_022548,gene-KI387_014965,Novel01535,gene-KI387_037892,Novel06334,gene-KI387_014579,ge…
GO:0005506	iron ion binding	molecular_function	0.00011223	0.014402	99	2561	599	24160	gene-KI387_016003,gene-KI387_040360,gene-KI387_034660,gene-KI387_014551,gene-KI387_022594,Novel03060,gene-KI387_026055,gene-KI387_002379,Novel00234,gene-KI387_030701,gene-KI387_026041,Novel03011,gene-KI387_007805,gene-KI387_002440,Novel00275,gene-KI387_039279,gene-KI387_001435,gene-KI387_034098,Novel03010,gene-KI387_043617,Novel00519,gene-KI387_026089,gene-KI387_031205,gene-KI387_002491,gene-KI38…
GO:0046474	glycerophospholipid biosynthetic process	biological_process	0.00012119	0.015143	16	2561	51	24160	gene-KI387_037854,Novel05200,Novel04242,gene-KI387_023862,Novel07580,gene-KI387_019159,gene-KI387_034893,gene-KI387_037885,gene-KI387_000104,gene-KI387_034693,gene-KI387_040413,gene-KI387_026390,Novel05921,Novel03789,gene-KI387_034894,gene-KI387_012178
GO:0009100	glycoprotein metabolic process	biological_process	0.00013233	0.015908	27	2561	110	24160	gene-KI387_030057,gene-KI387_034468,gene-KI387_024632,gene-KI387_033209,gene-KI387_029496,gene-KI387_014966,gene-KI387_022221,gene-KI387_014123,gene-KI387_014964,gene-KI387_017643,Novel07247,gene-KI387_007414,gene-KI387_019153,gene-KI387_037892,Novel01535,gene-KI387_022548,gene-KI387_014965,Novel00309,Novel05783,gene-KI387_024637,gene-KI387_026411,gene-KI387_031514,gene-KI387_014579,Novel06334,ge…
GO:1901137	carbohydrate derivative biosynthetic process	biological_process	0.00013402	0.015908	65	2561	373	24160	gene-KI387_025064,gene-KI387_015030,gene-KI387_023039,gene-KI387_019016,Novel00309,gene-KI387_014961,gene-KI387_037885,gene-KI387_034893,Novel01099,gene-KI387_016284,Novel06818,gene-KI387_014772,Novel07580,Novel07069,gene-KI387_024632,gene-KI387_007414,gene-KI387_019153,gene-KI387_028643,gene-KI387_024637,Novel03789,gene-KI387_026411,gene-KI387_028236,gene-KI387_014965,gene-KI387_022548,Novel0578…
GO:1901564	organonitrogen compound metabolic process	biological_process	0.00013784	0.015963	566	2561	4395	24160	gene-KI387_035685,Novel07267,gene-KI387_034693,Novel01428,gene-KI387_010087,gene-KI387_007377,gene-KI387_034864,gene-KI387_013881,Novel01633,gene-KI387_021829,gene-KI387_009670,gene-KI387_027652,gene-KI387_016576,gene-KI387_007358,gene-KI387_009851,gene-KI387_019733,Novel02509,gene-KI387_019936,gene-KI387_007927,Novel06586,gene-KI387_009186,gene-KI387_035594,gene-KI387_015468,gene-KI387_037377,No…
GO:0006796	phosphate-containing compound metabolic process	biological_process	0.00016322	0.018452	257	2561	1796	24160	gene-KI387_017946,gene-KI387_034893,Novel06698,gene-KI387_037678,gene-KI387_018123,Novel01099,gene-KI387_035959,gene-KI387_025064,gene-KI387_013763,gene-KI387_004226,Novel00295,gene-KI387_000104,gene-KI387_043176,gene-KI387_013749,gene-KI387_036098,Novel00551,gene-KI387_007472,gene-KI387_038096,gene-KI387_014504,Novel05342,gene-KI387_013497,gene-KI387_007483,gene-KI387_002544,gene-KI387_035983,ge…
GO:0006793	phosphorus metabolic process	biological_process	0.00018501	0.020428	257	2561	1801	24160	gene-KI387_042574,gene-KI387_028075,Novel01481,gene-KI387_027425,gene-KI387_019016,Novel00969,gene-KI387_011849,gene-KI387_007156,Novel06818,gene-KI387_006250,gene-KI387_013505,Novel07580,gene-KI387_009991,gene-KI387_034734,gene-KI387_014772,Novel07069,gene-KI387_008594,gene-KI387_004687,gene-KI387_028236,gene-KI387_031841,gene-KI387_017599,gene-KI387_007111,gene-KI387_037467,gene-KI387_024769,No…
GO:0005840	ribosome	cellular_component	0.00021078	0.022746	71	2561	474	24160	gene-KI387_011339,gene-KI387_006291,gene-KI387_031729,gene-KI387_041725,gene-KI387_025872,gene-KI387_010667,gene-KI387_018062,Novel02865,gene-KI387_027280,Novel01358,gene-KI387_016576,gene-KI387_033421,gene-KI387_017047,Novel04616,Novel06586,Novel01589,gene-KI387_000816,gene-KI387_018051,gene-KI387_007927,gene-KI387_009851,gene-KI387_001756,gene-KI387_037377,gene-KI387_019809,gene-KI387_030933,No…
GO:0015098	molybdate ion transmembrane transporter activity	molecular_function	0.00024167	0.024945	9	2561	20	24160	gene-KI387_004881,gene-KI387_024099,gene-KI387_029338,gene-KI387_015030,Novel07017,gene-KI387_019488,Novel04698,gene-KI387_005435,gene-KI387_016529
GO:0015689	molybdate ion transport	biological_process	0.00024167	0.024945	9	2561	20	24160	gene-KI387_005435,Novel04698,gene-KI387_016529,gene-KI387_004881,gene-KI387_029338,gene-KI387_015030,Novel07017,gene-KI387_019488,gene-KI387_024099
GO:0006650	glycerophospholipid metabolic process	biological_process	0.00027022	0.027298	18	2561	65	24160	Novel07580,gene-KI387_019159,gene-KI387_010050,gene-KI387_025456,Novel04242,gene-KI387_023862,gene-KI387_037854,Novel05200,gene-KI387_034894,Novel03789,gene-KI387_012178,gene-KI387_037885,gene-KI387_000104,gene-KI387_034893,Novel05921,gene-KI387_034693,gene-KI387_040413,gene-KI387_026390
GO:0015698	inorganic anion transport	biological_process	0.00029568	0.029248	20	2561	80	24160	Novel04698,gene-KI387_032173,gene-KI387_027972,gene-KI387_029519,gene-KI387_033396,gene-KI387_024099,Novel07017,gene-KI387_007805,gene-KI387_005435,gene-KI387_016529,gene-KI387_009627,gene-KI387_037885,gene-KI387_028017,gene-KI387_004881,Novel06334,gene-KI387_013451,gene-KI387_019488,gene-KI387_029338,gene-KI387_030556,gene-KI387_015030
GO:0009055	electron transfer activity	molecular_function	0.00030878	0.02992	48	2561	287	24160	gene-KI387_031189,gene-KI387_035360,gene-KI387_020865,Novel06434,gene-KI387_019637,gene-KI387_031195,gene-KI387_032152,Novel06722,gene-KI387_002742,gene-KI387_019638,gene-KI387_024703,gene-KI387_007931,gene-KI387_021555,gene-KI387_018415,gene-KI387_022773,gene-KI387_031191,Novel00336,gene-KI387_016342,gene-KI387_020965,gene-KI387_038769,Novel04609,gene-KI387_000339,gene-KI387_021556,gene-KI387_00…
GO:0050660	flavin adenine dinucleotide binding	molecular_function	0.00037905	0.035995	48	2561	242	24160	gene-KI387_034062,gene-KI387_040447,gene-KI387_005108,gene-KI387_034054,Novel03020,gene-KI387_017715,Novel01219,gene-KI387_014030,gene-KI387_018067,gene-KI387_014136,gene-KI387_033921,gene-KI387_005106,gene-KI387_041974,gene-KI387_039318,gene-KI387_034670,gene-KI387_018063,gene-KI387_018415,gene-KI387_035653,gene-KI387_034056,gene-KI387_034063,gene-KI387_034055,gene-KI387_035360,Novel03006,gene-K…
GO:0005976	polysaccharide metabolic process	biological_process	0.00041013	0.037996	38	2561	193	24160	gene-KI387_026906,gene-KI387_014712,gene-KI387_034379,gene-KI387_024485,gene-KI387_015549,gene-KI387_013573,gene-KI387_035280,gene-KI387_014673,gene-KI387_019578,gene-KI387_024921,Novel01543,gene-KI387_034241,gene-KI387_014677,Novel03474,gene-KI387_034276,gene-KI387_015139,gene-KI387_000177,gene-KI387_006097,gene-KI387_014584,gene-KI387_014678,gene-KI387_014742,gene-KI387_015030,gene-KI387_014676…
GO:0008654	phospholipid biosynthetic process	biological_process	0.00041613	0.037996	26	2561	117	24160	gene-KI387_012178,gene-KI387_007859,Novel03789,gene-KI387_034894,Novel06296,gene-KI387_026390,gene-KI387_034693,gene-KI387_040413,gene-KI387_042616,gene-KI387_006250,Novel06818,Novel01099,gene-KI387_002400,Novel05921,gene-KI387_034893,gene-KI387_037885,gene-KI387_000104,gene-KI387_035649,Novel07580,gene-KI387_019159,gene-KI387_042612,gene-KI387_037854,gene-KI387_035141,Novel05200,Novel04242,gene-…
GO:0030312	external encapsulating structure	cellular_component	0.00045971	0.041183	18	2561	68	24160	gene-KI387_014712,gene-KI387_014678,Novel04039,gene-KI387_009152,gene-KI387_016369,gene-KI387_028953,gene-KI387_006311,gene-KI387_014676,gene-KI387_031230,gene-KI387_034241,gene-KI387_014677,gene-KI387_014673,gene-KI387_035742,Novel01543,Novel02377,gene-KI387_011228,gene-KI387_014674,Novel03210
GO:0009058	biosynthetic process	biological_process	0.00050504	0.042846	558	2561	4523	24160	gene-KI387_030750,Novel00407,gene-KI387_026259,gene-KI387_031012,gene-KI387_026411,gene-KI387_003010,gene-KI387_036196,gene-KI387_035354,gene-KI387_005272,gene-KI387_037271,gene-KI387_018062,gene-KI387_027280,gene-KI387_023996,gene-KI387_037648,gene-KI387_000859,Novel06991,gene-KI387_006250,gene-KI387_007502,gene-KI387_008908,Novel02780,gene-KI387_008084,gene-KI387_043970,gene-KI387_028567,gene-K…
GO:0046488	phosphatidylinositol metabolic process	biological_process	0.00051414	0.042846	16	2561	57	24160	Novel04242,gene-KI387_023862,gene-KI387_037854,Novel07580,gene-KI387_019159,gene-KI387_010050,gene-KI387_025456,gene-KI387_037885,gene-KI387_000104,gene-KI387_034893,Novel05921,gene-KI387_040413,gene-KI387_034693,gene-KI387_034894,Novel03789,gene-KI387_012178
GO:0006497	protein lipidation	biological_process	0.00054101	0.042846	14	2561	47	24160	gene-KI387_037885,gene-KI387_000104,gene-KI387_034893,Novel04242,gene-KI387_023862,Novel05921,gene-KI387_034693,gene-KI387_040413,gene-KI387_037854,Novel03789,gene-KI387_034894,Novel07580,gene-KI387_019159,gene-KI387_012178
GO:0006505	GPI anchor metabolic process	biological_process	0.00054101	0.042846	14	2561	47	24160	gene-KI387_034893,gene-KI387_000104,gene-KI387_037885,gene-KI387_040413,gene-KI387_034693,gene-KI387_037854,Novel05921,gene-KI387_023862,Novel04242,gene-KI387_019159,Novel07580,gene-KI387_034894,Novel03789,gene-KI387_012178
GO:0006506	GPI anchor biosynthetic process	biological_process	0.00054101	0.042846	14	2561	47	24160	Novel04242,Novel05921,gene-KI387_023862,gene-KI387_037854,gene-KI387_034693,gene-KI387_040413,gene-KI387_037885,gene-KI387_000104,gene-KI387_034893,gene-KI387_012178,gene-KI387_034894,Novel03789,Novel07580,gene-KI387_019159
GO:0006661	phosphatidylinositol biosynthetic process	biological_process	0.00054101	0.042846	14	2561	47	24160	gene-KI387_034893,gene-KI387_037885,gene-KI387_000104,gene-KI387_034693,gene-KI387_040413,gene-KI387_037854,Novel04242,gene-KI387_023862,Novel05921,Novel07580,gene-KI387_019159,Novel03789,gene-KI387_034894,gene-KI387_012178
GO:0005575	cellular_component	cellular_component	0.00054144	0.042846	953	2561	8203	24160	gene-KI387_038611,gene-KI387_017370,gene-KI387_010752,gene-KI387_021849,gene-KI387_006194,Novel01054,gene-KI387_010667,gene-KI387_022548,gene-KI387_027813,Novel01469,gene-KI387_032920,gene-KI387_031962,gene-KI387_007216,gene-KI387_018251,gene-KI387_007472,gene-KI387_017027,gene-KI387_034379,Novel04952,gene-KI387_013749,gene-KI387_006291,gene-KI387_000104,gene-KI387_035814,Novel02377,gene-KI387_02…
GO:0006644	phospholipid metabolic process	biological_process	0.00056186	0.043733	29	2561	140	24160	Novel05921,gene-KI387_002400,Novel01099,gene-KI387_042616,gene-KI387_006250,gene-KI387_028454,Novel06818,gene-KI387_034693,gene-KI387_040413,gene-KI387_026390,gene-KI387_000104,gene-KI387_037885,gene-KI387_034893,gene-KI387_012178,Novel06296,gene-KI387_034894,Novel03789,gene-KI387_007859,gene-KI387_023862,Novel04242,Novel05200,gene-KI387_035141,gene-KI387_037854,gene-KI387_010050,gene-KI387_02545…
GO:0016780	phosphotransferase activity, for other substituted phosphate groups	molecular_function	0.00059269	0.044378	8	2561	18	24160	gene-KI387_035141,gene-KI387_035521,gene-KI387_020705,gene-KI387_035649,gene-KI387_027206,gene-KI387_007859,Novel06296,gene-KI387_005133
GO:0042158	lipoprotein biosynthetic process	biological_process	0.00059377	0.044378	14	2561	48	24160	Novel03789,gene-KI387_034894,gene-KI387_019159,Novel07580,gene-KI387_012178,gene-KI387_000104,gene-KI387_037885,gene-KI387_034893,Novel05921,gene-KI387_023862,Novel04242,gene-KI387_037854,gene-KI387_034693,gene-KI387_040413
GO:0071949	FAD binding	molecular_function	0.00060037	0.044378	31	2561	137	24160	gene-KI387_012320,gene-KI387_005108,gene-KI387_034054,gene-KI387_019136,gene-KI387_022917,gene-KI387_034062,gene-KI387_034016,Novel06565,Novel05957,gene-KI387_014640,gene-KI387_014656,gene-KI387_014030,Novel02311,Novel02948,gene-KI387_041974,gene-KI387_005106,gene-KI387_014136,gene-KI387_034060,gene-KI387_034053,gene-KI387_035653,gene-KI387_034008,gene-KI387_014654,gene-KI387_034050,gene-KI387_03…
GO:0044262	cellular carbohydrate metabolic process	biological_process	0.00061578	0.044378	40	2561	208	24160	gene-KI387_010870,gene-KI387_020429,gene-KI387_034379,gene-KI387_024485,gene-KI387_025580,gene-KI387_001780,gene-KI387_013573,gene-KI387_026906,gene-KI387_014712,gene-KI387_019070,gene-KI387_015349,gene-KI387_031081,gene-KI387_000177,Novel01543,gene-KI387_024921,gene-KI387_014673,gene-KI387_034276,gene-KI387_042612,gene-KI387_014677,gene-KI387_034241,gene-KI387_034378,gene-KI387_014676,gene-KI387…
GO:0044238	primary metabolic process	biological_process	0.0006186	0.044378	1048	2561	8831	24160	gene-KI387_033688,gene-KI387_013619,gene-KI387_026663,gene-KI387_014964,gene-KI387_016280,gene-KI387_023598,gene-KI387_018726,Novel03602,gene-KI387_024709,gene-KI387_019159,gene-KI387_034241,Novel04289,gene-KI387_002835,gene-KI387_038766,gene-KI387_022266,gene-KI387_002270,gene-KI387_038962,Novel01818,Novel01991,gene-KI387_036076,gene-KI387_043898,gene-KI387_017695,gene-KI387_026906,Novel05846,ge…
GO:0051704	multi-organism process	biological_process	0.00062623	0.044378	47	2561	260	24160	Novel01765,gene-KI387_019070,Novel00095,gene-KI387_016967,gene-KI387_006777,gene-KI387_001899,gene-KI387_034602,gene-KI387_016369,gene-KI387_031222,gene-KI387_023091,gene-KI387_004765,gene-KI387_035971,gene-KI387_031230,gene-KI387_004584,gene-KI387_018507,gene-KI387_035402,gene-KI387_038033,gene-KI387_006440,Novel01064,gene-KI387_038865,gene-KI387_022773,gene-KI387_008526,Novel03073,Novel00672,No…
GO:0003872	6-phosphofructokinase activity	molecular_function	0.00064978	0.04537	6	2561	10	24160	gene-KI387_022290,gene-KI387_011849,Novel00948,gene-KI387_014383,Novel05342,gene-KI387_011850
GO:0042157	lipoprotein metabolic process	biological_process	0.0006634	0.045649	19	2561	80	24160	gene-KI387_037409,gene-KI387_026659,Novel03789,gene-KI387_034894,gene-KI387_021451,Novel00649,gene-KI387_012178,gene-KI387_000104,gene-KI387_037885,gene-KI387_034893,Novel05921,gene-KI387_034693,gene-KI387_040413,gene-KI387_019159,Novel07580,Novel01054,gene-KI387_023862,Novel04242,gene-KI387_037854
GO:0071704	organic substance metabolic process	biological_process	0.00076266	0.05173	1112	2561	9455	24160	gene-KI387_029519,gene-KI387_003007,gene-KI387_035314,gene-KI387_016545,gene-KI387_020503,gene-KI387_012691,gene-KI387_025763,Novel03092,gene-KI387_028812,Novel06053,gene-KI387_011450,gene-KI387_026888,gene-KI387_015749,gene-KI387_023395,gene-KI387_016083,gene-KI387_035402,gene-KI387_019562,Novel07177,gene-KI387_005470,gene-KI387_021610,gene-KI387_001181,gene-KI387_037231,gene-KI387_018896,gene-K…
GO:0043412	macromolecule modification	biological_process	0.00099012	0.065558	283	2561	2035	24160	gene-KI387_030057,Novel03490,gene-KI387_013880,Novel03387,gene-KI387_029496,Novel01705,gene-KI387_008516,Novel06923,gene-KI387_013982,gene-KI387_034072,Novel01535,gene-KI387_020291,Novel00621,gene-KI387_012178,gene-KI387_031140,gene-KI387_016849,gene-KI387_035541,gene-KI387_019555,Novel05476,Novel01505,gene-KI387_039978,gene-KI387_026186,gene-KI387_022601,Novel07396,Novel02869,Novel05222,gene-KI3…
GO:0006643	membrane lipid metabolic process	biological_process	0.00099414	0.065558	21	2561	93	24160	gene-KI387_019159,Novel07580,gene-KI387_020865,gene-KI387_026321,gene-KI387_037854,gene-KI387_009034,gene-KI387_023862,Novel04242,gene-KI387_026320,Novel03789,gene-KI387_034894,gene-KI387_012178,gene-KI387_009036,gene-KI387_034893,gene-KI387_000104,gene-KI387_037885,Novel06818,gene-KI387_034693,gene-KI387_040413,Novel05921,Novel01099
GO:0030246	carbohydrate binding	molecular_function	0.0010087	0.065609	37	2561	184	24160	gene-KI387_035497,gene-KI387_008594,gene-KI387_026194,Novel06923,Novel00856,gene-KI387_029496,gene-KI387_007375,gene-KI387_031342,gene-KI387_029267,gene-KI387_023692,gene-KI387_006900,Novel06698,gene-KI387_012826,gene-KI387_037679,gene-KI387_021339,gene-KI387_023125,Novel01505,Novel02284,gene-KI387_011653,gene-KI387_009422,gene-KI387_040523,gene-KI387_013064,gene-KI387_010701,gene-KI387_002973,No…
GO:0019637	organophosphate metabolic process	biological_process	0.0010515	0.06747	77	2561	503	24160	Novel07069,gene-KI387_010050,Novel07580,gene-KI387_009991,gene-KI387_014772,gene-KI387_006250,Novel06818,gene-KI387_018123,Novel01099,gene-KI387_034893,gene-KI387_017946,gene-KI387_037885,gene-KI387_011849,gene-KI387_014285,gene-KI387_019016,gene-KI387_013763,gene-KI387_025064,Novel05342,gene-KI387_037854,gene-KI387_014383,gene-KI387_023862,gene-KI387_025456,gene-KI387_014162,gene-KI387_035983,ge…
GO:0046527	glucosyltransferase activity	molecular_function	0.0010738	0.067979	28	2561	130	24160	gene-KI387_025580,gene-KI387_009152,gene-KI387_013573,gene-KI387_034378,gene-KI387_014676,gene-KI387_024485,gene-KI387_034379,gene-KI387_019070,gene-KI387_014712,gene-KI387_014678,gene-KI387_014584,gene-KI387_006097,gene-KI387_026906,gene-KI387_031081,gene-KI387_000177,gene-KI387_034380,gene-KI387_000179,gene-KI387_021402,gene-KI387_014674,gene-KI387_014585,gene-KI387_024922,Novel03376,gene-KI387…
GO:0016762	xyloglucan:xyloglucosyl transferase activity	molecular_function	0.001231	0.075895	10	2561	29	24160	gene-KI387_014673,Novel02377,Novel01543,gene-KI387_034241,gene-KI387_014677,gene-KI387_014678,gene-KI387_014712,gene-KI387_014676,gene-KI387_014674,gene-KI387_009152
GO:0048046	apoplast	cellular_component	0.001231	0.075895	10	2561	29	24160	Novel02377,Novel01543,gene-KI387_014673,gene-KI387_014712,gene-KI387_014678,gene-KI387_014677,gene-KI387_034241,gene-KI387_014676,gene-KI387_009152,gene-KI387_014674
GO:0015103	inorganic anion transmembrane transporter activity	molecular_function	0.0012468	0.075895	15	2561	56	24160	gene-KI387_027972,gene-KI387_007805,gene-KI387_005435,Novel04698,gene-KI387_009627,gene-KI387_016529,gene-KI387_004881,gene-KI387_030556,gene-KI387_029338,gene-KI387_019488,Novel07017,gene-KI387_015030,gene-KI387_024099,gene-KI387_013451,gene-KI387_033396
GO:0005618	cell wall	cellular_component	0.0014056	0.084481	12	2561	40	24160	Novel02377,Novel01543,gene-KI387_014673,gene-KI387_014712,gene-KI387_014678,gene-KI387_034241,gene-KI387_014677,gene-KI387_014676,gene-KI387_006311,gene-KI387_009152,gene-KI387_014674,gene-KI387_011228
GO:0008963	phospho-N-acetylmuramoyl-pentapeptide-transferase activity	molecular_function	0.0014949	0.087732	3	2561	3	24160	gene-KI387_027206,gene-KI387_020705,gene-KI387_005133
GO:0050662	obsolete coenzyme binding	molecular_function	0.0015278	0.087732	42	2561	236	24160	gene-KI387_037231,gene-KI387_037150,gene-KI387_010080,gene-KI387_025615,gene-KI387_005539,gene-KI387_039188,gene-KI387_013957,Novel04350,gene-KI387_011918,gene-KI387_023184,gene-KI387_005156,gene-KI387_026242,Novel05617,gene-KI387_038840,gene-KI387_009600,gene-KI387_024591,Novel02836,Novel01501,gene-KI387_030865,gene-KI387_021590,gene-KI387_013958,gene-KI387_019839,Novel01758,gene-KI387_024003,ge…
GO:0006073	cellular glucan metabolic process	biological_process	0.0015336	0.087732	25	2561	116	24160	gene-KI387_021402,gene-KI387_014674,gene-KI387_000179,gene-KI387_000177,gene-KI387_034380,gene-KI387_014585,Novel03376,gene-KI387_034241,gene-KI387_014677,gene-KI387_024922,gene-KI387_024921,gene-KI387_014673,Novel01543,Novel02377,gene-KI387_013573,gene-KI387_009152,gene-KI387_034379,gene-KI387_024485,gene-KI387_034378,gene-KI387_014676,gene-KI387_006097,gene-KI387_014712,gene-KI387_014678,gene-K…
GO:0044042	glucan metabolic process	biological_process	0.0015336	0.087732	25	2561	116	24160	gene-KI387_013573,gene-KI387_009152,gene-KI387_034379,gene-KI387_024485,gene-KI387_014676,gene-KI387_034378,gene-KI387_006097,gene-KI387_014584,gene-KI387_014678,gene-KI387_014712,gene-KI387_026906,gene-KI387_014674,gene-KI387_021402,gene-KI387_000179,gene-KI387_034380,gene-KI387_000177,gene-KI387_014585,gene-KI387_014677,gene-KI387_034241,Novel03376,gene-KI387_024922,gene-KI387_014673,gene-KI387…
GO:0006664	glycolipid metabolic process	biological_process	0.0016499	0.093259	19	2561	83	24160	Novel06818,gene-KI387_034693,gene-KI387_040413,Novel05921,Novel01099,gene-KI387_009036,gene-KI387_034893,gene-KI387_000104,gene-KI387_037885,gene-KI387_012178,gene-KI387_034894,Novel03789,gene-KI387_009034,gene-KI387_037854,gene-KI387_023862,Novel04242,gene-KI387_019159,Novel07580,gene-KI387_020865
GO:0016567	protein ubiquitination	biological_process	0.0016943	0.094641	24	2561	104	24160	gene-KI387_031765,Novel03808,gene-KI387_019631,Novel01818,gene-KI387_023125,Novel06334,Novel02401,gene-KI387_019629,gene-KI387_009471,Novel07267,Novel05276,gene-KI387_021501,gene-KI387_009056,gene-KI387_020614,gene-KI387_038766,gene-KI387_000369,Novel03484,gene-KI387_031951,gene-KI387_014859,gene-KI387_018689,gene-KI387_003956,Novel03809,Novel05145,Novel06691
GO:0016705	oxidoreductase activity, acting on paired donors, with incorporation or reduction of molecular oxygen	molecular_function	0.0017252	0.095247	98	2561	638	24160	gene-KI387_040546,Novel03971,Novel06261,gene-KI387_040919,gene-KI387_000275,gene-KI387_033741,gene-KI387_027505,gene-KI387_040884,gene-KI387_028874,gene-KI387_014656,gene-KI387_019429,gene-KI387_010353,gene-KI387_035915,gene-KI387_011587,gene-KI387_026051,gene-KI387_015265,gene-KI387_022917,gene-KI387_030704,gene-KI387_035360,gene-KI387_036036,gene-KI387_017736,gene-KI387_015251,gene-KI387_041624…
GO:0018106	peptidyl-histidine phosphorylation	biological_process	0.0018129	0.097816	4	2561	6	24160	gene-KI387_026663,gene-KI387_005156,gene-KI387_026365,gene-KI387_016849
GO:0018202	peptidyl-histidine modification	biological_process	0.0018129	0.097816	4	2561	6	24160	gene-KI387_026365,gene-KI387_005156,gene-KI387_026663,gene-KI387_016849
GO:1903509	liposaccharide metabolic process	biological_process	0.0020455	0.10912	21	2561	98	24160	Novel07580,gene-KI387_019159,gene-KI387_034276,gene-KI387_020865,gene-KI387_037854,gene-KI387_009034,Novel04242,gene-KI387_023862,Novel03789,gene-KI387_034894,gene-KI387_015030,gene-KI387_012178,gene-KI387_034893,gene-KI387_009036,gene-KI387_037885,gene-KI387_000104,gene-KI387_040413,gene-KI387_034693,Novel06818,Novel01099,Novel05921
GO:0001401	SAM complex	cellular_component	0.002127	0.11221	5	2561	11	24160	gene-KI387_044328,gene-KI387_002738,gene-KI387_002742,Novel03630,gene-KI387_002736
GO:0016829	lyase activity	molecular_function	0.0022129	0.11516	65	2561	425	24160	gene-KI387_035760,gene-KI387_019627,gene-KI387_042576,gene-KI387_025209,gene-KI387_029489,gene-KI387_038701,Novel04036,gene-KI387_024757,gene-KI387_017963,gene-KI387_033055,gene-KI387_021379,gene-KI387_024158,gene-KI387_005181,gene-KI387_007772,Novel03338,gene-KI387_000885,gene-KI387_010602,gene-KI387_014640,gene-KI387_036227,Novel05887,gene-KI387_028988,gene-KI387_022306,gene-KI387_034213,gene-K…
GO:0032446	protein modification by small protein conjugation	biological_process	0.0022315	0.11516	24	2561	106	24160	gene-KI387_031765,Novel03808,gene-KI387_019631,Novel01818,gene-KI387_023125,Novel02401,Novel06334,Novel07267,gene-KI387_019629,gene-KI387_009471,gene-KI387_009056,gene-KI387_021501,Novel05276,gene-KI387_038766,gene-KI387_020614,Novel03484,gene-KI387_000369,gene-KI387_031951,gene-KI387_018689,gene-KI387_014859,gene-KI387_003956,Novel03809,Novel06691,Novel05145
GO:0030170	pyridoxal phosphate binding	molecular_function	0.0024709	0.12481	23	2561	105	24160	gene-KI387_016502,gene-KI387_029182,gene-KI387_012851,gene-KI387_023397,Novel06050,gene-KI387_008351,gene-KI387_024089,gene-KI387_009182,gene-KI387_009186,gene-KI387_034990,gene-KI387_009190,gene-KI387_009192,gene-KI387_031726,gene-KI387_008680,gene-KI387_034869,gene-KI387_034864,gene-KI387_007969,gene-KI387_035354,gene-KI387_025209,gene-KI387_022306,Novel07017,gene-KI387_039530,gene-KI387_001533
GO:0070279	vitamin B6 binding	molecular_function	0.0024709	0.12481	23	2561	105	24160	gene-KI387_034864,gene-KI387_007969,gene-KI387_035354,gene-KI387_034869,gene-KI387_008680,gene-KI387_009192,gene-KI387_031726,gene-KI387_001533,gene-KI387_039530,gene-KI387_022306,Novel07017,gene-KI387_025209,gene-KI387_012851,gene-KI387_008351,Novel06050,gene-KI387_023397,gene-KI387_016502,gene-KI387_029182,gene-KI387_009190,gene-KI387_009186,gene-KI387_034990,gene-KI387_009182,gene-KI387_024089
GO:0006555	methionine metabolic process	biological_process	0.0025018	0.12504	6	2561	13	24160	gene-KI387_017695,Novel03955,gene-KI387_031012,gene-KI387_032808,gene-KI387_037012,Novel06400
GO:0016840	carbon-nitrogen lyase activity	molecular_function	0.0025398	0.12562	9	2561	26	24160	gene-KI387_024812,Novel03338,gene-KI387_004986,gene-KI387_021877,gene-KI387_025888,gene-KI387_010362,gene-KI387_017280,gene-KI387_005181,gene-KI387_033055
GO:0008121	ubiquinol-cytochrome-c reductase activity	molecular_function	0.0026593	0.12884	9	2561	28	24160	gene-KI387_035235,Novel02115,Novel06434,gene-KI387_020965,gene-KI387_035360,gene-KI387_022773,gene-KI387_011971,gene-KI387_022807,gene-KI387_000339
GO:0016681	oxidoreductase activity, acting on diphenols and related substances as donors, cytochrome as acceptor	molecular_function	0.0026593	0.12884	9	2561	28	24160	gene-KI387_022773,gene-KI387_011971,gene-KI387_022807,gene-KI387_000339,gene-KI387_035235,Novel02115,Novel06434,gene-KI387_020965,gene-KI387_035360
GO:0016310	phosphorylation	biological_process	0.0026928	0.12915	186	2561	1290	24160	gene-KI387_032013,gene-KI387_034468,gene-KI387_015371,gene-KI387_001008,gene-KI387_024648,gene-KI387_027368,gene-KI387_034371,gene-KI387_010897,gene-KI387_012980,gene-KI387_028841,gene-KI387_008526,gene-KI387_004123,gene-KI387_008272,gene-KI387_037505,Novel02733,gene-KI387_031072,gene-KI387_002315,gene-KI387_021339,Novel06233,gene-KI387_032197,gene-KI387_043706,gene-KI387_035754,gene-KI387_017242…
GO:0044264	cellular polysaccharide metabolic process	biological_process	0.0027747	0.13174	27	2561	136	24160	gene-KI387_014585,gene-KI387_034380,gene-KI387_000179,gene-KI387_000177,gene-KI387_014674,gene-KI387_021402,Novel01543,Novel02377,gene-KI387_014673,gene-KI387_024921,gene-KI387_024922,gene-KI387_034276,gene-KI387_014677,gene-KI387_034241,Novel03376,gene-KI387_014676,gene-KI387_034378,gene-KI387_024485,gene-KI387_034379,gene-KI387_009152,gene-KI387_013573,gene-KI387_026906,gene-KI387_014584,gene-K…
GO:0005198	structural molecule activity	molecular_function	0.0028217	0.13265	101	2561	761	24160	Novel02490,gene-KI387_005314,gene-KI387_017413,gene-KI387_018686,gene-KI387_013451,gene-KI387_018125,Novel06984,gene-KI387_016577,gene-KI387_026695,gene-KI387_015746,Novel06565,gene-KI387_016526,gene-KI387_028812,Novel02869,gene-KI387_035890,gene-KI387_031023,gene-KI387_009126,gene-KI387_009524,gene-KI387_001851,Novel02126,Novel06566,gene-KI387_037158,Novel03051,gene-KI387_025347,gene-KI387_01732…
GO:1901700	response to oxygen-containing compound	biological_process	0.0031471	0.1465	16	2561	73	24160	gene-KI387_021972,gene-KI387_025064,gene-KI387_021982,Novel03760,Novel04081,Novel03759,gene-KI387_004287,gene-KI387_021980,gene-KI387_021979,Novel03749,gene-KI387_021941,gene-KI387_021973,gene-KI387_021981,gene-KI387_021939,Novel03765,Novel03745
GO:0009856	pollination	biological_process	0.003354	0.15024	16	2561	62	24160	gene-KI387_008526,Novel03073,Novel01765,gene-KI387_037505,Novel03382,gene-KI387_034602,Novel04499,Novel06233,Novel01099,Novel03387,gene-KI387_006440,gene-KI387_018507,gene-KI387_034072,gene-KI387_038865,gene-KI387_022773,Novel01064
GO:0009875	pollen-pistil interaction	biological_process	0.003354	0.15024	16	2561	62	24160	Novel04499,gene-KI387_034602,Novel03382,gene-KI387_037505,Novel06233,Novel01099,Novel01765,Novel03073,gene-KI387_008526,gene-KI387_034072,Novel01064,gene-KI387_022773,gene-KI387_038865,Novel03387,gene-KI387_018507,gene-KI387_006440
GO:0044706	multi-multicellular organism process	biological_process	0.003354	0.15024	16	2561	62	24160	Novel03387,gene-KI387_006440,gene-KI387_018507,gene-KI387_034072,gene-KI387_038865,gene-KI387_022773,Novel01064,Novel03073,gene-KI387_008526,Novel01765,gene-KI387_037505,Novel03382,gene-KI387_034602,Novel04499,Novel06233,Novel01099
GO:0048544	recognition of pollen	biological_process	0.003354	0.15024	16	2561	62	24160	gene-KI387_006440,gene-KI387_018507,Novel03387,gene-KI387_038865,gene-KI387_022773,Novel01064,gene-KI387_034072,Novel03073,gene-KI387_008526,Novel01765,Novel01099,Novel06233,Novel03382,gene-KI387_037505,gene-KI387_034602,Novel04499
GO:0006821	chloride transport	biological_process	0.0033859	0.15024	8	2561	23	24160	gene-KI387_029519,gene-KI387_027972,gene-KI387_007805,gene-KI387_009627,gene-KI387_028017,gene-KI387_030556,gene-KI387_013451,Novel06334
GO:0044255	cellular lipid metabolic process	biological_process	0.0034681	0.15247	68	2561	439	24160	gene-KI387_007868,gene-KI387_025456,gene-KI387_016961,gene-KI387_035649,gene-KI387_037648,gene-KI387_020865,gene-KI387_009034,gene-KI387_037854,gene-KI387_023862,gene-KI387_026321,gene-KI387_039339,gene-KI387_009489,gene-KI387_026320,gene-KI387_036098,Novel03789,gene-KI387_034693,gene-KI387_026390,gene-KI387_027528,gene-KI387_027480,gene-KI387_002400,gene-KI387_000104,gene-KI387_019863,gene-KI387…
GO:1901576	organic substance biosynthetic process	biological_process	0.0035237	0.15251	526	2561	4355	24160	gene-KI387_011070,gene-KI387_010870,gene-KI387_034693,Novel05989,gene-KI387_020391,gene-KI387_027969,Novel03705,gene-KI387_016961,gene-KI387_027652,gene-KI387_016576,gene-KI387_010321,gene-KI387_012823,gene-KI387_035649,gene-KI387_007975,gene-KI387_001414,gene-KI387_035594,gene-KI387_015468,gene-KI387_037377,gene-KI387_035413,gene-KI387_009479,Novel02333,gene-KI387_009851,gene-KI387_028824,gene-K…
GO:0090407	organophosphate biosynthetic process	biological_process	0.0035332	0.15251	56	2561	356	24160	Novel05887,gene-KI387_020344,gene-KI387_019509,gene-KI387_014162,gene-KI387_035649,gene-KI387_019159,gene-KI387_042612,Novel05342,gene-KI387_035141,gene-KI387_037854,Novel05200,gene-KI387_002853,gene-KI387_023862,gene-KI387_004986,gene-KI387_028236,gene-KI387_007859,gene-KI387_022362,gene-KI387_034894,Novel03789,Novel06296,gene-KI387_026390,gene-KI387_034693,gene-KI387_040413,gene-KI387_035919,ge…
GO:0030176	integral component of endoplasmic reticulum membrane	cellular_component	0.0036597	0.15515	14	2561	59	24160	gene-KI387_037505,gene-KI387_037885,gene-KI387_034693,gene-KI387_040413,gene-KI387_020139,gene-KI387_026909,gene-KI387_023862,Novel04920,gene-KI387_006902,gene-KI387_009714,gene-KI387_008390,Novel02621,Novel03614,Novel03812
GO:0031227	intrinsic component of endoplasmic reticulum membrane	cellular_component	0.0036597	0.15515	14	2561	59	24160	gene-KI387_009714,Novel03614,gene-KI387_008390,Novel02621,Novel03812,gene-KI387_006902,Novel04920,gene-KI387_034693,gene-KI387_040413,gene-KI387_026909,gene-KI387_020139,gene-KI387_023862,gene-KI387_037505,gene-KI387_037885
GO:0009247	glycolipid biosynthetic process	biological_process	0.003846	0.16018	18	2561	82	24160	Novel06818,gene-KI387_034693,gene-KI387_040413,Novel05921,Novel01099,gene-KI387_034893,gene-KI387_009036,gene-KI387_000104,gene-KI387_037885,gene-KI387_012178,Novel03789,gene-KI387_034894,gene-KI387_037854,gene-KI387_009034,gene-KI387_023862,Novel04242,gene-KI387_019159,Novel07580
GO:0046467	membrane lipid biosynthetic process	biological_process	0.003846	0.16018	18	2561	82	24160	Novel07580,gene-KI387_019159,gene-KI387_009034,gene-KI387_037854,Novel04242,gene-KI387_023862,Novel03789,gene-KI387_034894,gene-KI387_012178,gene-KI387_009036,gene-KI387_034893,gene-KI387_037885,gene-KI387_000104,gene-KI387_034693,gene-KI387_040413,Novel06818,Novel01099,Novel05921
GO:0061982	meiosis I cell cycle process	biological_process	0.0039954	0.16496	9	2561	33	24160	gene-KI387_002709,gene-KI387_002835,Novel01237,gene-KI387_002849,Novel00672,Novel00295,gene-KI387_022362,gene-KI387_003006,gene-KI387_025538
GO:0019842	vitamin binding	molecular_function	0.0040631	0.16631	30	2561	155	24160	gene-KI387_009186,gene-KI387_034990,gene-KI387_009190,gene-KI387_024089,gene-KI387_009182,gene-KI387_012851,Novel06050,gene-KI387_008351,gene-KI387_023397,gene-KI387_016502,gene-KI387_029182,gene-KI387_001533,gene-KI387_039159,gene-KI387_028330,gene-KI387_014653,gene-KI387_025209,Novel07017,gene-KI387_039530,gene-KI387_022306,gene-KI387_034869,gene-KI387_034864,gene-KI387_034266,gene-KI387_004306…
GO:0008283	cell population proliferation	biological_process	0.0043175	0.17521	7	2561	27	24160	Novel05736,Novel05453,gene-KI387_029041,gene-KI387_029038,Novel05735,Novel05734,gene-KI387_019070
GO:0016842	amidine-lyase activity	molecular_function	0.0048617	0.19562	6	2561	15	24160	gene-KI387_005181,gene-KI387_021877,gene-KI387_004986,gene-KI387_024812,gene-KI387_010362,Novel03338
GO:1901681	sulfur compound binding	molecular_function	0.0049779	0.19851	13	2561	51	24160	gene-KI387_039159,gene-KI387_028330,Novel06915,gene-KI387_030597,gene-KI387_014653,gene-KI387_034266,gene-KI387_004306,Novel06680,gene-KI387_007738,gene-KI387_039381,gene-KI387_004621,gene-KI387_013958,gene-KI387_014654
GO:1901566	organonitrogen compound biosynthetic process	biological_process	0.0050171	0.19851	210	2561	1614	24160	gene-KI387_028643,gene-KI387_027178,gene-KI387_019153,gene-KI387_007414,gene-KI387_024632,Novel04070,gene-KI387_016284,gene-KI387_009851,gene-KI387_036923,gene-KI387_001756,gene-KI387_005435,gene-KI387_037885,gene-KI387_017047,gene-KI387_025073,gene-KI387_033421,gene-KI387_007927,Novel00496,Novel04616,Novel06586,gene-KI387_019408,gene-KI387_035594,gene-KI387_015468,gene-KI387_030823,gene-KI387_03…
GO:0005539	glycosaminoglycan binding	molecular_function	0.0051303	0.20131	6	2561	16	24160	gene-KI387_013958,gene-KI387_030597,Novel01505,Novel01491,gene-KI387_039381,Novel06915
GO:0008194	UDP-glycosyltransferase activity	molecular_function	0.0052609	0.20475	28	2561	147	24160	gene-KI387_014585,gene-KI387_014123,gene-KI387_026480,gene-KI387_021402,gene-KI387_024533,gene-KI387_031081,gene-KI387_000179,gene-KI387_000177,gene-KI387_034380,gene-KI387_024921,gene-KI387_034241,gene-KI387_024922,gene-KI387_024485,gene-KI387_034379,Novel06818,gene-KI387_034378,Novel01099,gene-KI387_013573,gene-KI387_000104,gene-KI387_025580,gene-KI387_026906,gene-KI387_012178,Novel03544,gene-K…
GO:0008037	cell recognition	biological_process	0.005337	0.20602	16	2561	65	24160	Novel03073,gene-KI387_008526,Novel01765,gene-KI387_034602,Novel03382,gene-KI387_037505,Novel04499,Novel06233,Novel01099,Novel03387,gene-KI387_006440,gene-KI387_018507,gene-KI387_034072,gene-KI387_022773,gene-KI387_038865,Novel01064
GO:0005789	endoplasmic reticulum membrane	cellular_component	0.0059054	0.22612	35	2561	216	24160	gene-KI387_009479,gene-KI387_006902,Novel04920,gene-KI387_015236,Novel06400,Novel03812,Novel00309,gene-KI387_037885,gene-KI387_037505,gene-KI387_034893,Novel05921,gene-KI387_001692,gene-KI387_015465,Novel07580,gene-KI387_030057,gene-KI387_030897,gene-KI387_020139,Novel04242,Novel03789,gene-KI387_034894,gene-KI387_014579,gene-KI387_009714,gene-KI387_023267,Novel05783,Novel03614,Novel02621,gene-KI3…
GO:0042175	nuclear outer membrane-endoplasmic reticulum membrane network	cellular_component	0.0064906	0.24654	35	2561	217	24160	gene-KI387_001692,Novel05921,gene-KI387_034893,gene-KI387_037885,gene-KI387_037505,Novel00309,Novel03812,gene-KI387_015236,Novel06400,Novel04920,gene-KI387_006902,gene-KI387_009479,Novel04242,gene-KI387_020139,gene-KI387_030897,gene-KI387_030057,Novel07580,gene-KI387_015465,gene-KI387_034693,Novel03749,gene-KI387_040413,gene-KI387_026909,Novel05783,Novel02621,Novel03614,gene-KI387_009714,gene-KI3…
GO:0019751	polyol metabolic process	biological_process	0.0068022	0.25633	9	2561	37	24160	gene-KI387_019509,gene-KI387_015349,gene-KI387_011792,gene-KI387_042612,gene-KI387_011785,gene-KI387_006250,gene-KI387_042616,gene-KI387_010870,gene-KI387_001780
GO:0044283	small molecule biosynthetic process	biological_process	0.0070014	0.26175	59	2561	399	24160	gene-KI387_017695,gene-KI387_009566,gene-KI387_030917,Novel06459,gene-KI387_039339,gene-KI387_022362,gene-KI387_031012,gene-KI387_020972,gene-KI387_008557,gene-KI387_010870,gene-KI387_030750,gene-KI387_019509,gene-KI387_037648,gene-KI387_034213,Novel04839,gene-KI387_014214,gene-KI387_037286,gene-KI387_027081,gene-KI387_008229,gene-KI387_042612,gene-KI387_036183,gene-KI387_002048,gene-KI387_031026…
GO:0016884	carbon-nitrogen ligase activity, with glutamine as amido-N-donor	molecular_function	0.0072167	0.26769	5	2561	11	24160	gene-KI387_012059,gene-KI387_011758,gene-KI387_008557,gene-KI387_022690,gene-KI387_036092
GO:0055085	transmembrane transport	biological_process	0.007385	0.27181	184	2561	1389	24160	gene-KI387_012774,gene-KI387_025520,gene-KI387_027439,gene-KI387_030234,gene-KI387_000400,gene-KI387_009627,Novel00407,Novel01469,gene-KI387_031259,gene-KI387_029338,gene-KI387_028126,Novel06680,gene-KI387_012659,gene-KI387_034613,gene-KI387_014600,gene-KI387_009504,gene-KI387_034485,gene-KI387_010320,gene-KI387_010752,gene-KI387_011497,gene-KI387_027336,gene-KI387_030967,gene-KI387_042919,gene-K…
GO:0016052	carbohydrate catabolic process	biological_process	0.007633	0.27878	21	2561	111	24160	gene-KI387_015549,gene-KI387_011849,Novel04510,gene-KI387_022290,gene-KI387_016297,gene-KI387_031072,gene-KI387_025601,gene-KI387_017946,gene-KI387_035280,gene-KI387_011850,gene-KI387_011792,gene-KI387_015139,Novel05342,gene-KI387_014383,gene-KI387_035983,Novel00948,gene-KI387_019578,Novel03474,gene-KI387_011785,gene-KI387_022767,gene-KI387_035754
GO:0006468	protein phosphorylation	biological_process	0.0079556	0.28643	170	2561	1189	24160	gene-KI387_002315,gene-KI387_008272,gene-KI387_037505,Novel02733,gene-KI387_032197,Novel06233,gene-KI387_021339,gene-KI387_004123,gene-KI387_008526,gene-KI387_027368,gene-KI387_034371,gene-KI387_028841,gene-KI387_012980,gene-KI387_010897,gene-KI387_034468,gene-KI387_001008,gene-KI387_024648,gene-KI387_015371,gene-KI387_032013,Novel00380,gene-KI387_004467,gene-KI387_029388,gene-KI387_017437,gene-K…
GO:0006811	ion transport	biological_process	0.008259	0.28643	137	2561	1033	24160	gene-KI387_015497,Novel05085,gene-KI387_007805,gene-KI387_035685,gene-KI387_032443,gene-KI387_005377,gene-KI387_039308,gene-KI387_009489,gene-KI387_018627,gene-KI387_027972,gene-KI387_015139,gene-KI387_033425,gene-KI387_024099,gene-KI387_034601,Novel07017,gene-KI387_038848,Novel02854,gene-KI387_037885,gene-KI387_005435,gene-KI387_019136,gene-KI387_032445,gene-KI387_020987,gene-KI387_000588,gene-K…
GO:0004061	arylformamidase activity	molecular_function	0.0084457	0.28643	2	2561	2	24160	gene-KI387_012305,gene-KI387_012304
GO:0006569	tryptophan catabolic process	biological_process	0.0084457	0.28643	2	2561	2	24160	gene-KI387_012305,gene-KI387_012304
GO:0009310	amine catabolic process	biological_process	0.0084457	0.28643	2	2561	2	24160	gene-KI387_012305,gene-KI387_012304
GO:0019441	tryptophan catabolic process to kynurenine	biological_process	0.0084457	0.28643	2	2561	2	24160	gene-KI387_012305,gene-KI387_012304
GO:0042402	cellular biogenic amine catabolic process	biological_process	0.0084457	0.28643	2	2561	2	24160	gene-KI387_012305,gene-KI387_012304
GO:0042436	indole-containing compound catabolic process	biological_process	0.0084457	0.28643	2	2561	2	24160	gene-KI387_012305,gene-KI387_012304
GO:0046218	indolalkylamine catabolic process	biological_process	0.0084457	0.28643	2	2561	2	24160	gene-KI387_012304,gene-KI387_012305
GO:0070189	kynurenine metabolic process	biological_process	0.0084457	0.28643	2	2561	2	24160	gene-KI387_012305,gene-KI387_012304
GO:1903046	meiotic cell cycle process	biological_process	0.0089862	0.3026	9	2561	36	24160	gene-KI387_002709,gene-KI387_002835,Novel00295,gene-KI387_003006,gene-KI387_025538,gene-KI387_022362,Novel00672,gene-KI387_002849,Novel01237
GO:0016903	oxidoreductase activity, acting on the aldehyde or oxo group of donors	molecular_function	0.0092945	0.30626	20	2561	99	24160	gene-KI387_039188,gene-KI387_026303,gene-KI387_021590,gene-KI387_022835,gene-KI387_026259,gene-KI387_021598,gene-KI387_011918,gene-KI387_011587,gene-KI387_006517,gene-KI387_017394,gene-KI387_022745,gene-KI387_011705,gene-KI387_026438,gene-KI387_004306,gene-KI387_034266,gene-KI387_033741,gene-KI387_024281,gene-KI387_027202,gene-KI387_039159,gene-KI387_026442
GO:0009126	purine nucleoside monophosphate metabolic process	biological_process	0.0094175	0.30626	5	2561	12	24160	gene-KI387_005181,gene-KI387_004986,gene-KI387_022690,gene-KI387_008557,gene-KI387_035919
GO:0009127	purine nucleoside monophosphate biosynthetic process	biological_process	0.0094175	0.30626	5	2561	12	24160	gene-KI387_035919,gene-KI387_008557,gene-KI387_022690,gene-KI387_005181,gene-KI387_004986
GO:0009167	purine ribonucleoside monophosphate metabolic process	biological_process	0.0094175	0.30626	5	2561	12	24160	gene-KI387_004986,gene-KI387_005181,gene-KI387_008557,gene-KI387_022690,gene-KI387_035919
GO:0009168	purine ribonucleoside monophosphate biosynthetic process	biological_process	0.0094175	0.30626	5	2561	12	24160	gene-KI387_004986,gene-KI387_005181,gene-KI387_022690,gene-KI387_008557,gene-KI387_035919
GO:0008443	phosphofructokinase activity	molecular_function	0.0098619	0.31853	9	2561	34	24160	gene-KI387_011850,gene-KI387_020344,Novel00948,gene-KI387_017746,gene-KI387_004546,Novel05342,gene-KI387_014383,gene-KI387_011849,gene-KI387_022290
GO:0098599	palmitoyl hydrolase activity	molecular_function	0.0099326	0.31865	6	2561	17	24160	gene-KI387_022720,gene-KI387_022722,gene-KI387_011971,gene-KI387_039280,Novel02237,gene-KI387_029411
GO:0009086	methionine biosynthetic process	biological_process	0.010015	0.31912	4	2561	8	24160	gene-KI387_032808,Novel06400,gene-KI387_031012,gene-KI387_017695
GO:0016741	transferase activity, transferring one-carbon groups	molecular_function	0.010325	0.32681	67	2561	457	24160	Novel00140,gene-KI387_036805,gene-KI387_030823,Novel06400,gene-KI387_036906,Novel00843,gene-KI387_036923,gene-KI387_021471,gene-KI387_010386,gene-KI387_015187,gene-KI387_036841,Novel06474,Novel07116,gene-KI387_027912,gene-KI387_026873,gene-KI387_005958,gene-KI387_028580,gene-KI387_019835,gene-KI387_017296,gene-KI387_027813,gene-KI387_021890,gene-KI387_002466,gene-KI387_006188,gene-KI387_031012,ge…
GO:0004601	peroxidase activity	molecular_function	0.010718	0.33701	32	2561	198	24160	gene-KI387_023131,gene-KI387_023159,gene-KI387_023162,gene-KI387_001183,gene-KI387_002221,gene-KI387_009540,gene-KI387_023138,gene-KI387_023163,gene-KI387_023091,gene-KI387_023160,Novel02843,gene-KI387_013916,gene-KI387_036815,gene-KI387_023130,Novel02720,gene-KI387_023155,gene-KI387_023169,gene-KI387_023090,gene-KI387_029489,gene-KI387_023153,gene-KI387_023148,gene-KI387_023137,gene-KI387_023702…
GO:0006338	chromatin remodeling	biological_process	0.011008	0.34385	21	2561	120	24160	gene-KI387_000955,gene-KI387_024168,gene-KI387_000953,gene-KI387_035814,gene-KI387_010589,Novel01396,gene-KI387_013081,gene-KI387_010447,gene-KI387_010807,gene-KI387_039024,gene-KI387_005264,Novel00970,gene-KI387_012576,gene-KI387_018715,gene-KI387_014730,gene-KI387_000711,Novel00971,gene-KI387_004268,gene-KI387_006537,Novel03875,gene-KI387_028917
GO:0030001	metal ion transport	biological_process	0.011532	0.3544	63	2561	442	24160	gene-KI387_032443,gene-KI387_010429,Novel03614,gene-KI387_009714,gene-KI387_009489,gene-KI387_005377,gene-KI387_016078,gene-KI387_026259,Novel01113,Novel00336,gene-KI387_038854,gene-KI387_007805,Novel00647,gene-KI387_016466,gene-KI387_034063,gene-KI387_014600,Novel02854,gene-KI387_029522,gene-KI387_034017,gene-KI387_007137,gene-KI387_010436,gene-KI387_009504,Novel00648,gene-KI387_015139,gene-KI38…
GO:0007127	meiosis I	biological_process	0.011621	0.3544	6	2561	20	24160	Novel00295,gene-KI387_002709,gene-KI387_025538,gene-KI387_003006,Novel01237,Novel00672
GO:0003839	gamma-glutamylcyclotransferase activity	molecular_function	0.011719	0.3544	4	2561	9	24160	gene-KI387_021877,Novel03338,gene-KI387_010362,gene-KI387_024812
GO:0006751	glutathione catabolic process	biological_process	0.011719	0.3544	4	2561	9	24160	Novel03338,gene-KI387_024812,gene-KI387_010362,gene-KI387_021877
GO:0043171	peptide catabolic process	biological_process	0.011719	0.3544	4	2561	9	24160	gene-KI387_021877,gene-KI387_024812,gene-KI387_010362,Novel03338
GO:0006576	cellular biogenic amine metabolic process	biological_process	0.012262	0.35797	13	2561	57	24160	gene-KI387_012150,gene-KI387_003306,gene-KI387_035760,gene-KI387_003309,gene-KI387_003806,gene-KI387_012305,gene-KI387_008405,gene-KI387_009433,gene-KI387_029489,gene-KI387_042919,gene-KI387_024275,gene-KI387_003318,gene-KI387_012304
GO:0044106	cellular amine metabolic process	biological_process	0.012262	0.35797	13	2561	57	24160	gene-KI387_003306,gene-KI387_035760,gene-KI387_012150,gene-KI387_012305,gene-KI387_008405,gene-KI387_003806,gene-KI387_003309,gene-KI387_009433,gene-KI387_012304,gene-KI387_042919,gene-KI387_024275,gene-KI387_003318,gene-KI387_029489
GO:0009123	nucleoside monophosphate metabolic process	biological_process	0.012407	0.35797	5	2561	13	24160	gene-KI387_004986,gene-KI387_005181,gene-KI387_035919,gene-KI387_022690,gene-KI387_008557
GO:0009124	nucleoside monophosphate biosynthetic process	biological_process	0.012407	0.35797	5	2561	13	24160	gene-KI387_005181,gene-KI387_004986,gene-KI387_022690,gene-KI387_008557,gene-KI387_035919
GO:0009156	ribonucleoside monophosphate biosynthetic process	biological_process	0.012407	0.35797	5	2561	13	24160	gene-KI387_008557,gene-KI387_022690,gene-KI387_035919,gene-KI387_004986,gene-KI387_005181
GO:0009161	ribonucleoside monophosphate metabolic process	biological_process	0.012407	0.35797	5	2561	13	24160	gene-KI387_008557,gene-KI387_022690,gene-KI387_035919,gene-KI387_005181,gene-KI387_004986
GO:0015018	galactosylgalactosylxylosylprotein 3-beta-glucuronosyltransferase activity	molecular_function	0.012479	0.35797	3	2561	5	24160	gene-KI387_024533,gene-KI387_026480,gene-KI387_012431
GO:0015020	glucuronosyltransferase activity	molecular_function	0.012479	0.35797	3	2561	5	24160	gene-KI387_026480,gene-KI387_024533,gene-KI387_012431
GO:0019200	carbohydrate kinase activity	molecular_function	0.012515	0.35797	9	2561	35	24160	gene-KI387_011849,gene-KI387_022290,gene-KI387_004546,gene-KI387_014383,Novel05342,gene-KI387_017746,gene-KI387_011850,Novel00948,gene-KI387_020344
GO:0008198	ferrous iron binding	molecular_function	0.012703	0.36116	3	2561	6	24160	gene-KI387_002379,gene-KI387_037202,gene-KI387_005771
GO:0009067	aspartate family amino acid biosynthetic process	biological_process	0.012986	0.36491	10	2561	45	24160	gene-KI387_011705,gene-KI387_021590,gene-KI387_032808,gene-KI387_036183,gene-KI387_031012,Novel06400,gene-KI387_012059,gene-KI387_032801,gene-KI387_017695,gene-KI387_011758
GO:0004143	diacylglycerol kinase activity	molecular_function	0.013066	0.36491	3	2561	5	24160	gene-KI387_018123,gene-KI387_030231,gene-KI387_008872
GO:0007205	protein kinase C-activating G protein-coupled receptor signaling pathway	biological_process	0.013066	0.36491	3	2561	5	24160	gene-KI387_008872,gene-KI387_018123,gene-KI387_030231
GO:0042180	cellular ketone metabolic process	biological_process	0.014316	0.39749	6	2561	18	24160	gene-KI387_024648,gene-KI387_009566,gene-KI387_012304,gene-KI387_034213,gene-KI387_008229,gene-KI387_012305
GO:0009072	aromatic amino acid family metabolic process	biological_process	0.014552	0.4017	14	2561	68	24160	gene-KI387_016502,gene-KI387_012304,gene-KI387_007772,gene-KI387_042576,gene-KI387_012305,gene-KI387_031855,gene-KI387_022362,Novel04070,gene-KI387_032476,gene-KI387_030917,gene-KI387_030923,gene-KI387_019408,gene-KI387_024757,gene-KI387_022988
GO:0016773	phosphotransferase activity, alcohol group as acceptor	molecular_function	0.015596	0.42336	203	2561	1479	24160	gene-KI387_018507,gene-KI387_025456,gene-KI387_007771,Novel07026,gene-KI387_034370,gene-KI387_038848,Novel01064,gene-KI387_025697,gene-KI387_038865,gene-KI387_006728,gene-KI387_013881,gene-KI387_043984,Novel01633,Novel01428,gene-KI387_010695,gene-KI387_016733,gene-KI387_039127,gene-KI387_025736,gene-KI387_035882,gene-KI387_013874,gene-KI387_016368,gene-KI387_020614,gene-KI387_014893,Novel00840,ge…
GO:0019236	response to pheromone	biological_process	0.015868	0.42336	5	2561	12	24160	gene-KI387_012888,gene-KI387_037340,gene-KI387_031514,gene-KI387_024079,gene-KI387_019145
GO:0006820	anion transport	biological_process	0.015886	0.42336	33	2561	204	24160	gene-KI387_004881,gene-KI387_040032,gene-KI387_029338,gene-KI387_030556,gene-KI387_007805,gene-KI387_028454,gene-KI387_009627,gene-KI387_015497,gene-KI387_024099,gene-KI387_034601,Novel07017,gene-KI387_033425,gene-KI387_027972,gene-KI387_026064,gene-KI387_012659,gene-KI387_028017,gene-KI387_015238,gene-KI387_015030,gene-KI387_019488,Novel06334,gene-KI387_013451,gene-KI387_039007,gene-KI387_005435…
GO:0003854	3-beta-hydroxy-delta5-steroid dehydrogenase activity	molecular_function	0.015895	0.42336	25	2561	140	24160	gene-KI387_021590,gene-KI387_025615,gene-KI387_010080,gene-KI387_039188,Novel01501,gene-KI387_037150,gene-KI387_037231,gene-KI387_030865,Novel02919,gene-KI387_021598,gene-KI387_039689,gene-KI387_011918,gene-KI387_016183,Novel01758,gene-KI387_013957,gene-KI387_029882,gene-KI387_023250,gene-KI387_036183,gene-KI387_023184,gene-KI387_037149,gene-KI387_001233,Novel02918,gene-KI387_026242,Novel05617,ge…
GO:0016229	steroid dehydrogenase activity	molecular_function	0.015895	0.42336	25	2561	140	24160	gene-KI387_025615,gene-KI387_021590,gene-KI387_010080,gene-KI387_039188,gene-KI387_037231,Novel01501,gene-KI387_037150,gene-KI387_030865,Novel02919,gene-KI387_016183,gene-KI387_021598,gene-KI387_039689,gene-KI387_011918,gene-KI387_013957,Novel01758,gene-KI387_023250,gene-KI387_029882,gene-KI387_037149,gene-KI387_023184,gene-KI387_036183,gene-KI387_001233,gene-KI387_026242,Novel02918,gene-KI387_03…
GO:0033764	steroid dehydrogenase activity, acting on the CH-OH group of donors, NAD or NADP as acceptor	molecular_function	0.015895	0.42336	25	2561	140	24160	gene-KI387_029882,gene-KI387_023250,gene-KI387_023184,gene-KI387_037149,gene-KI387_036183,gene-KI387_001233,gene-KI387_026242,Novel02918,gene-KI387_033785,Novel05617,gene-KI387_025615,gene-KI387_021590,gene-KI387_010080,gene-KI387_039188,gene-KI387_037231,gene-KI387_037150,Novel01501,gene-KI387_030865,Novel02919,gene-KI387_039689,gene-KI387_021598,gene-KI387_016183,gene-KI387_011918,gene-KI387_01…
GO:0008168	methyltransferase activity	molecular_function	0.015961	0.42336	64	2561	443	24160	gene-KI387_019741,gene-KI387_031012,gene-KI387_007121,gene-KI387_006188,gene-KI387_021890,gene-KI387_002466,gene-KI387_027813,gene-KI387_017296,Novel03705,gene-KI387_007120,gene-KI387_000859,gene-KI387_022421,gene-KI387_006187,Novel05349,gene-KI387_009670,Novel01085,gene-KI387_021829,gene-KI387_027922,gene-KI387_016385,gene-KI387_007877,gene-KI387_036906,Novel00843,Novel06400,gene-KI387_030823,ge…
GO:0042221	response to chemical	biological_process	0.016168	0.42537	43	2561	298	24160	Novel03765,gene-KI387_039891,Novel03716,gene-KI387_028330,gene-KI387_021981,Novel03749,gene-KI387_021980,gene-KI387_017240,Novel02607,Novel03760,Novel04081,gene-KI387_026607,gene-KI387_035508,gene-KI387_021972,gene-KI387_019145,Novel01113,Novel00336,gene-KI387_021982,gene-KI387_031514,gene-KI387_024347,gene-KI387_037340,gene-KI387_013150,gene-KI387_024079,Novel03745,gene-KI387_012888,gene-KI387_0…
GO:0016209	antioxidant activity	molecular_function	0.016216	0.42537	39	2561	258	24160	gene-KI387_023163,gene-KI387_023138,gene-KI387_009540,gene-KI387_005794,gene-KI387_013916,Novel02843,gene-KI387_023160,gene-KI387_023091,gene-KI387_001183,gene-KI387_023162,gene-KI387_023159,gene-KI387_023131,gene-KI387_002221,gene-KI387_012522,gene-KI387_010574,gene-KI387_026888,gene-KI387_039793,gene-KI387_018338,Novel06652,gene-KI387_023165,gene-KI387_028001,gene-KI387_010594,gene-KI387_029490…
GO:0008201	heparin binding	molecular_function	0.016809	0.4385	4	2561	9	24160	gene-KI387_039381,Novel06915,gene-KI387_013958,gene-KI387_030597
GO:0008509	anion transmembrane transporter activity	molecular_function	0.017064	0.43882	17	2561	85	24160	gene-KI387_027972,Novel04698,gene-KI387_024099,Novel07017,gene-KI387_018341,gene-KI387_033396,gene-KI387_030438,gene-KI387_005435,gene-KI387_007805,gene-KI387_016529,gene-KI387_009627,gene-KI387_004881,gene-KI387_029338,gene-KI387_019488,gene-KI387_030556,gene-KI387_015030,gene-KI387_013451
GO:0044249	cellular biosynthetic process	biological_process	0.017159	0.43882	492	2561	4159	24160	gene-KI387_024757,gene-KI387_027583,gene-KI387_019459,gene-KI387_023384,gene-KI387_003367,gene-KI387_037409,gene-KI387_003389,Novel03120,gene-KI387_042616,Novel05921,gene-KI387_007772,Novel02052,gene-KI387_024960,gene-KI387_009463,gene-KI387_034468,Novel05424,gene-KI387_022690,gene-KI387_026339,gene-KI387_014528,gene-KI387_032801,gene-KI387_042806,gene-KI387_035687,Novel03376,gene-KI387_038959,No…
GO:0009066	aspartate family amino acid metabolic process	biological_process	0.017178	0.43882	12	2561	58	24160	gene-KI387_017695,gene-KI387_011758,Novel06400,gene-KI387_012059,gene-KI387_032801,gene-KI387_031012,gene-KI387_036183,gene-KI387_037012,gene-KI387_032808,gene-KI387_021590,Novel03955,gene-KI387_011705
GO:0044267	cellular protein metabolic process	biological_process	0.017198	0.43882	356	2561	2803	24160	gene-KI387_035960,gene-KI387_019153,gene-KI387_000369,gene-KI387_005730,gene-KI387_014893,gene-KI387_024632,gene-KI387_018689,gene-KI387_026365,gene-KI387_007358,gene-KI387_009851,gene-KI387_001756,Novel06104,gene-KI387_019936,gene-KI387_037885,gene-KI387_007927,Novel06586,gene-KI387_024203,gene-KI387_035893,gene-KI387_035594,gene-KI387_037377,Novel02333,gene-KI387_001614,gene-KI387_013905,gene-K…
GO:0006020	inositol metabolic process	biological_process	0.017283	0.43882	5	2561	18	24160	gene-KI387_006250,gene-KI387_042616,gene-KI387_042612,gene-KI387_011785,gene-KI387_011792
GO:0006694	steroid biosynthetic process	biological_process	0.017821	0.44577	26	2561	149	24160	gene-KI387_029882,gene-KI387_023250,gene-KI387_037149,gene-KI387_023184,gene-KI387_013578,gene-KI387_036183,gene-KI387_001233,Novel02918,gene-KI387_026242,gene-KI387_033785,Novel05617,gene-KI387_021590,gene-KI387_025615,gene-KI387_010080,gene-KI387_039188,gene-KI387_037231,Novel01501,gene-KI387_037150,gene-KI387_030865,Novel02919,gene-KI387_039689,gene-KI387_021598,gene-KI387_016183,gene-KI387_01…
GO:0007129	synapsis	biological_process	0.01812	0.44577	4	2561	11	24160	gene-KI387_003006,gene-KI387_002709,Novel00295,Novel00672
GO:0007130	synaptonemal complex assembly	biological_process	0.01812	0.44577	4	2561	11	24160	Novel00672,gene-KI387_003006,Novel00295,gene-KI387_002709
GO:0045143	homologous chromosome segregation	biological_process	0.01812	0.44577	4	2561	11	24160	Novel00672,gene-KI387_003006,gene-KI387_002709,Novel00295
GO:0070192	chromosome organization involved in meiotic cell cycle	biological_process	0.01812	0.44577	4	2561	11	24160	gene-KI387_003006,gene-KI387_002709,Novel00295,Novel00672
GO:0070193	synaptonemal complex organization	biological_process	0.01812	0.44577	4	2561	11	24160	gene-KI387_003006,Novel00295,gene-KI387_002709,Novel00672
GO:0003922	GMP synthase (glutamine-hydrolyzing) activity	molecular_function	0.018642	0.44929	2	2561	2	24160	gene-KI387_022690,gene-KI387_008557
GO:0006177	GMP biosynthetic process	biological_process	0.018642	0.44929	2	2561	2	24160	gene-KI387_022690,gene-KI387_008557
GO:0046037	GMP metabolic process	biological_process	0.018642	0.44929	2	2561	2	24160	gene-KI387_008557,gene-KI387_022690
GO:1901070	guanosine-containing compound biosynthetic process	biological_process	0.018642	0.44929	2	2561	2	24160	gene-KI387_008557,gene-KI387_022690
GO:0005507	copper ion binding	molecular_function	0.01957	0.46929	24	2561	133	24160	gene-KI387_015413,gene-KI387_026438,gene-KI387_009133,gene-KI387_031195,gene-KI387_026442,gene-KI387_009131,gene-KI387_028330,gene-KI387_038844,gene-KI387_016401,gene-KI387_009132,gene-KI387_009130,gene-KI387_001057,gene-KI387_037018,gene-KI387_038498,Novel07377,gene-KI387_037016,gene-KI387_005435,gene-KI387_001072,gene-KI387_038866,gene-KI387_022757,gene-KI387_038494,gene-KI387_024757,gene-KI387…
GO:0016301	kinase activity	molecular_function	0.020849	0.49514	216	2561	1585	24160	gene-KI387_021339,Novel06233,gene-KI387_018052,gene-KI387_007535,gene-KI387_032197,Novel02733,gene-KI387_037505,gene-KI387_008272,gene-KI387_031072,gene-KI387_002315,gene-KI387_004123,gene-KI387_008526,gene-KI387_008921,gene-KI387_012980,gene-KI387_028841,gene-KI387_010897,gene-KI387_034371,gene-KI387_027368,gene-KI387_032013,gene-KI387_015371,gene-KI387_001008,gene-KI387_024648,gene-KI387_034468…
GO:0072521	purine-containing compound metabolic process	biological_process	0.020873	0.49514	36	2561	239	24160	gene-KI387_031072,gene-KI387_013958,gene-KI387_017946,gene-KI387_011849,gene-KI387_013763,gene-KI387_019016,gene-KI387_011850,gene-KI387_005181,gene-KI387_025064,gene-KI387_035541,gene-KI387_037409,gene-KI387_030597,gene-KI387_009463,Novel07069,Novel00948,gene-KI387_026339,gene-KI387_022690,gene-KI387_009991,gene-KI387_038959,gene-KI387_014772,gene-KI387_035919,gene-KI387_008557,gene-KI387_022290…
GO:0008202	steroid metabolic process	biological_process	0.020961	0.49514	26	2561	151	24160	gene-KI387_001233,Novel05617,gene-KI387_033785,Novel02918,gene-KI387_026242,gene-KI387_013578,gene-KI387_036183,gene-KI387_023184,gene-KI387_037149,gene-KI387_029882,gene-KI387_023250,gene-KI387_039689,gene-KI387_021598,gene-KI387_016183,gene-KI387_011918,Novel02919,gene-KI387_013957,Novel01758,gene-KI387_039188,gene-KI387_010080,gene-KI387_025615,gene-KI387_021590,gene-KI387_030865,Novel01501,ge…
GO:0007034	vacuolar transport	biological_process	0.022051	0.51624	7	2561	28	24160	Novel00856,gene-KI387_036893,Novel00251,gene-KI387_020801,Novel00647,gene-KI387_020987,gene-KI387_018607
GO:0009074	aromatic amino acid family catabolic process	biological_process	0.022072	0.51624	3	2561	7	24160	gene-KI387_016502,gene-KI387_012304,gene-KI387_012305
GO:0042765	GPI-anchor transamidase complex	cellular_component	0.022495	0.52356	5	2561	15	24160	gene-KI387_023862,gene-KI387_034693,gene-KI387_040413,gene-KI387_037885,gene-KI387_006902
GO:0016684	oxidoreductase activity, acting on peroxide as acceptor	molecular_function	0.023171	0.53666	32	2561	208	24160	gene-KI387_023090,gene-KI387_023137,gene-KI387_023702,gene-KI387_023140,gene-KI387_029488,Novel00195,gene-KI387_023153,gene-KI387_029489,gene-KI387_023148,Novel02720,gene-KI387_036815,gene-KI387_023130,gene-KI387_023169,gene-KI387_023155,Novel06652,gene-KI387_023165,Novel07421,gene-KI387_010594,gene-KI387_028001,gene-KI387_029490,gene-KI387_002221,gene-KI387_001183,gene-KI387_023162,gene-KI387_02…
GO:0016616	oxidoreductase activity, acting on the CH-OH group of donors, NAD or NADP as acceptor	molecular_function	0.023544	0.5393	46	2561	295	24160	gene-KI387_001410,Novel01758,gene-KI387_019408,gene-KI387_014285,gene-KI387_021598,gene-KI387_039689,gene-KI387_016183,Novel02919,gene-KI387_030597,gene-KI387_002431,gene-KI387_030865,Novel01501,Novel02836,gene-KI387_013958,gene-KI387_007867,gene-KI387_033131,gene-KI387_021590,gene-KI387_033785,Novel02918,gene-KI387_001233,gene-KI387_037149,gene-KI387_029882,gene-KI387_023250,gene-KI387_020139,ge…
GO:0042578	phosphoric ester hydrolase activity	molecular_function	0.023615	0.5393	40	2561	248	24160	gene-KI387_033938,gene-KI387_038096,gene-KI387_004095,gene-KI387_022266,gene-KI387_035215,gene-KI387_010870,gene-KI387_022425,gene-KI387_021637,gene-KI387_012084,gene-KI387_028330,gene-KI387_012918,gene-KI387_020344,gene-KI387_012135,gene-KI387_007975,gene-KI387_005926,gene-KI387_022313,gene-KI387_002048,gene-KI387_003318,gene-KI387_014858,gene-KI387_003306,gene-KI387_037686,gene-KI387_007071,gen…
GO:0016053	organic acid biosynthetic process	biological_process	0.023739	0.5393	37	2561	244	24160	gene-KI387_036183,gene-KI387_027081,gene-KI387_037286,gene-KI387_037648,Novel04839,gene-KI387_020972,gene-KI387_031012,gene-KI387_022362,gene-KI387_039339,gene-KI387_030917,Novel06459,gene-KI387_017695,gene-KI387_011705,gene-KI387_014788,gene-KI387_024281,gene-KI387_042576,gene-KI387_032801,Novel04070,Novel05424,gene-KI387_022988,gene-KI387_021590,gene-KI387_032808,gene-KI387_012250,gene-KI387_00…
GO:0046394	carboxylic acid biosynthetic process	biological_process	0.023739	0.5393	37	2561	244	24160	gene-KI387_037648,Novel04839,gene-KI387_037286,gene-KI387_027081,gene-KI387_036183,gene-KI387_022362,gene-KI387_031012,gene-KI387_017695,gene-KI387_039339,gene-KI387_030917,Novel06459,gene-KI387_020972,gene-KI387_032801,Novel04070,gene-KI387_024281,gene-KI387_042576,gene-KI387_022988,Novel05424,gene-KI387_011705,gene-KI387_014788,gene-KI387_026868,gene-KI387_012059,Novel06400,gene-KI387_019345,ge…
GO:0004725	protein tyrosine phosphatase activity	molecular_function	0.023981	0.5422	8	2561	30	24160	gene-KI387_019635,gene-KI387_022266,Novel00871,gene-KI387_022425,gene-KI387_024195,gene-KI387_022348,gene-KI387_038096,gene-KI387_007975
GO:1901264	carbohydrate derivative transport	biological_process	0.024853	0.55925	5	2561	16	24160	Novel03154,gene-KI387_013507,gene-KI387_011538,gene-KI387_001099,gene-KI387_001098
GO:0006066	alcohol metabolic process	biological_process	0.025211	0.56311	9	2561	44	24160	gene-KI387_015349,gene-KI387_011792,gene-KI387_042612,gene-KI387_011785,gene-KI387_019509,gene-KI387_001780,gene-KI387_042616,gene-KI387_006250,gene-KI387_010870
GO:0006355	regulation of transcription, DNA-templated	biological_process	0.025577	0.56311	194	2561	1552	24160	gene-KI387_016849,gene-KI387_031027,gene-KI387_027781,gene-KI387_030922,gene-KI387_021598,gene-KI387_021476,Novel05702,Novel02017,gene-KI387_010294,gene-KI387_028938,Novel01235,Novel03801,gene-KI387_007382,Novel03490,gene-KI387_007401,gene-KI387_043807,Novel00152,gene-KI387_030919,gene-KI387_021478,gene-KI387_003007,gene-KI387_012030,gene-KI387_029218,Novel05846,gene-KI387_042138,gene-KI387_02922…
GO:1903506	regulation of nucleic acid-templated transcription	biological_process	0.025577	0.56311	194	2561	1552	24160	gene-KI387_001176,gene-KI387_017437,Novel02315,gene-KI387_001185,gene-KI387_023267,gene-KI387_026607,gene-KI387_016982,gene-KI387_032178,Novel02425,gene-KI387_035939,Novel04342,gene-KI387_012164,gene-KI387_009116,Novel05031,gene-KI387_019578,gene-KI387_001182,gene-KI387_022545,gene-KI387_014871,gene-KI387_017137,gene-KI387_039891,gene-KI387_029628,gene-KI387_039337,gene-KI387_009135,gene-KI387_00…
GO:2001141	regulation of RNA biosynthetic process	biological_process	0.025577	0.56311	194	2561	1552	24160	gene-KI387_003006,gene-KI387_023384,gene-KI387_003367,gene-KI387_003389,gene-KI387_027583,gene-KI387_006747,gene-KI387_011998,gene-KI387_000711,gene-KI387_026686,gene-KI387_026933,gene-KI387_018113,gene-KI387_024960,Novel03120,gene-KI387_001851,gene-KI387_035687,gene-KI387_006093,gene-KI387_042806,gene-KI387_001795,gene-KI387_011991,gene-KI387_012620,gene-KI387_014528,Novel05318,gene-KI387_034799…
GO:0006743	ubiquinone metabolic process	biological_process	0.025874	0.56311	4	2561	10	24160	gene-KI387_034213,gene-KI387_008229,gene-KI387_024648,gene-KI387_009566
GO:0006744	ubiquinone biosynthetic process	biological_process	0.025874	0.56311	4	2561	10	24160	gene-KI387_024648,gene-KI387_009566,gene-KI387_034213,gene-KI387_008229
GO:0015095	magnesium ion transmembrane transporter activity	molecular_function	0.025973	0.56311	4	2561	11	24160	gene-KI387_007137,gene-KI387_001584,gene-KI387_000588,gene-KI387_018627
GO:0015693	magnesium ion transport	biological_process	0.025973	0.56311	4	2561	11	24160	gene-KI387_000588,gene-KI387_018627,gene-KI387_001584,gene-KI387_007137
GO:0051252	regulation of RNA metabolic process	biological_process	0.026289	0.56602	194	2561	1553	24160	gene-KI387_035402,gene-KI387_006674,gene-KI387_030611,gene-KI387_029522,gene-KI387_036722,gene-KI387_028558,gene-KI387_037173,gene-KI387_003873,gene-KI387_035829,Novel05846,gene-KI387_029228,gene-KI387_042138,gene-KI387_002173,gene-KI387_036076,gene-KI387_036170,Novel01991,gene-KI387_037434,gene-KI387_023506,gene-KI387_021610,gene-KI387_037234,gene-KI387_001181,gene-KI387_003207,gene-KI387_007382…
GO:0045017	glycerolipid biosynthetic process	biological_process	0.026648	0.56602	17	2561	87	24160	gene-KI387_034894,Novel03789,gene-KI387_012178,gene-KI387_034893,gene-KI387_037885,gene-KI387_000104,gene-KI387_040413,gene-KI387_034693,gene-KI387_026390,Novel05921,gene-KI387_027480,Novel07580,gene-KI387_019159,gene-KI387_037854,Novel05200,Novel04242,gene-KI387_023862
GO:0000747	conjugation with cellular fusion	biological_process	0.026658	0.56602	4	2561	10	24160	gene-KI387_006186,gene-KI387_024079,gene-KI387_036274,gene-KI387_037340
GO:0140253	cell-cell fusion	biological_process	0.026658	0.56602	4	2561	10	24160	gene-KI387_006186,gene-KI387_024079,gene-KI387_037340,gene-KI387_036274
GO:0006979	response to oxidative stress	biological_process	0.026704	0.56602	32	2561	213	24160	gene-KI387_004287,Novel07421,gene-KI387_010594,gene-KI387_028001,gene-KI387_029490,gene-KI387_023165,Novel06652,gene-KI387_023130,Novel02720,gene-KI387_023155,gene-KI387_023169,gene-KI387_023090,gene-KI387_029489,gene-KI387_023153,gene-KI387_023148,gene-KI387_023702,gene-KI387_023137,gene-KI387_029488,gene-KI387_023140,Novel00195,gene-KI387_009540,gene-KI387_023138,gene-KI387_023163,gene-KI387_02…
GO:0046486	glycerolipid metabolic process	biological_process	0.027192	0.56695	19	2561	101	24160	gene-KI387_027480,Novel05921,gene-KI387_034693,gene-KI387_026390,gene-KI387_040413,gene-KI387_037885,gene-KI387_000104,gene-KI387_034893,gene-KI387_012178,Novel03789,gene-KI387_034894,Novel04242,gene-KI387_023862,gene-KI387_037854,Novel05200,gene-KI387_010050,gene-KI387_025456,Novel07580,gene-KI387_019159
GO:0019219	regulation of nucleobase-containing compound metabolic process	biological_process	0.02805	0.56695	194	2561	1556	24160	gene-KI387_023267,Novel02315,gene-KI387_001185,gene-KI387_026607,gene-KI387_001176,gene-KI387_017437,Novel04342,gene-KI387_012164,Novel05031,gene-KI387_009116,gene-KI387_032178,Novel02425,gene-KI387_016982,gene-KI387_035939,gene-KI387_019578,gene-KI387_001182,gene-KI387_039337,gene-KI387_009135,gene-KI387_022545,gene-KI387_014871,gene-KI387_039891,gene-KI387_017137,gene-KI387_029628,gene-KI387_02…
GO:0042537	benzene-containing compound metabolic process	biological_process	0.028314	0.56695	2	2561	3	24160	gene-KI387_012304,gene-KI387_012305
GO:0140013	meiotic nuclear division	biological_process	0.028338	0.56695	6	2561	23	24160	gene-KI387_002709,Novel00295,gene-KI387_025538,gene-KI387_003006,Novel00672,Novel01237
GO:1901505	carbohydrate derivative transmembrane transporter activity	molecular_function	0.028352	0.56695	6	2561	21	24160	gene-KI387_011538,gene-KI387_001099,gene-KI387_001098,Novel03154,gene-KI387_013507,gene-KI387_030438
GO:0019538	protein metabolic process	biological_process	0.028769	0.56695	433	2561	3517	24160	gene-KI387_034893,gene-KI387_018051,Novel01589,gene-KI387_007867,Novel06698,gene-KI387_037678,Novel01099,gene-KI387_031196,gene-KI387_035959,gene-KI387_019809,Novel06857,gene-KI387_035883,Novel00309,gene-KI387_004226,gene-KI387_029882,Novel00295,Novel03017,gene-KI387_006291,gene-KI387_000104,gene-KI387_013749,gene-KI387_031729,gene-KI387_002936,Novel00551,gene-KI387_010667,gene-KI387_038096,gene-…
GO:0030131	clathrin adaptor complex	cellular_component	0.028843	0.56695	3	2561	6	24160	Novel05632,gene-KI387_006304,gene-KI387_040351
GO:0008883	glutamyl-tRNA reductase activity	molecular_function	0.029266	0.56695	4	2561	11	24160	gene-KI387_011705,gene-KI387_026259,gene-KI387_033741,gene-KI387_011587
GO:0030674	protein-macromolecule adaptor activity	molecular_function	0.029269	0.56695	6	2561	22	24160	Novel04168,gene-KI387_017185,gene-KI387_022201,gene-KI387_023267,gene-KI387_006674,gene-KI387_017189
GO:0098799	outer mitochondrial membrane protein complex	cellular_component	0.029381	0.56695	9	2561	40	24160	gene-KI387_025599,Novel03171,Novel03630,gene-KI387_002738,Novel05424,gene-KI387_002736,gene-KI387_002742,gene-KI387_044328,gene-KI387_036235
GO:0004336	galactosylceramidase activity	molecular_function	0.029603	0.56695	1	2561	1	24160	gene-KI387_020865
GO:0006677	glycosylceramide metabolic process	biological_process	0.029603	0.56695	1	2561	1	24160	gene-KI387_020865
GO:0006681	galactosylceramide metabolic process	biological_process	0.029603	0.56695	1	2561	1	24160	gene-KI387_020865
GO:0006683	galactosylceramide catabolic process	biological_process	0.029603	0.56695	1	2561	1	24160	gene-KI387_020865
GO:0006687	glycosphingolipid metabolic process	biological_process	0.029603	0.56695	1	2561	1	24160	gene-KI387_020865
GO:0019374	galactolipid metabolic process	biological_process	0.029603	0.56695	1	2561	1	24160	gene-KI387_020865
GO:0019376	galactolipid catabolic process	biological_process	0.029603	0.56695	1	2561	1	24160	gene-KI387_020865
GO:0019377	glycolipid catabolic process	biological_process	0.029603	0.56695	1	2561	1	24160	gene-KI387_020865
GO:0030149	sphingolipid catabolic process	biological_process	0.029603	0.56695	1	2561	1	24160	gene-KI387_020865
GO:0046466	membrane lipid catabolic process	biological_process	0.029603	0.56695	1	2561	1	24160	gene-KI387_020865
GO:0046477	glycosylceramide catabolic process	biological_process	0.029603	0.56695	1	2561	1	24160	gene-KI387_020865
GO:0046479	glycosphingolipid catabolic process	biological_process	0.029603	0.56695	1	2561	1	24160	gene-KI387_020865
GO:0046514	ceramide catabolic process	biological_process	0.029603	0.56695	1	2561	1	24160	gene-KI387_020865
GO:0019310	inositol catabolic process	biological_process	0.029742	0.56695	2	2561	3	24160	gene-KI387_011785,gene-KI387_011792
GO:0050113	inositol oxygenase activity	molecular_function	0.029742	0.56695	2	2561	3	24160	gene-KI387_011792,gene-KI387_011785
GO:0006163	purine nucleotide metabolic process	biological_process	0.03	0.56695	34	2561	230	24160	gene-KI387_022767,gene-KI387_035754,gene-KI387_035983,Novel05887,gene-KI387_004986,Novel05342,gene-KI387_014383,gene-KI387_034894,gene-KI387_028236,gene-KI387_003207,Novel00407,gene-KI387_022290,gene-KI387_035280,gene-KI387_008557,gene-KI387_035919,gene-KI387_014772,gene-KI387_038959,gene-KI387_009991,gene-KI387_026339,gene-KI387_022690,gene-KI387_009463,Novel00948,Novel07069,gene-KI387_025064,ge…
GO:0006096	glycolytic process	biological_process	0.030927	0.56695	11	2561	56	24160	gene-KI387_014383,Novel05342,gene-KI387_011849,gene-KI387_017946,gene-KI387_031072,gene-KI387_022290,gene-KI387_035983,gene-KI387_011850,Novel00948,gene-KI387_022767,gene-KI387_035754
GO:0006165	nucleoside diphosphate phosphorylation	biological_process	0.030927	0.56695	11	2561	56	24160	Novel05342,gene-KI387_014383,gene-KI387_011849,gene-KI387_022290,gene-KI387_031072,gene-KI387_017946,gene-KI387_035983,gene-KI387_011850,Novel00948,gene-KI387_022767,gene-KI387_035754
GO:0006757	ATP generation from ADP	biological_process	0.030927	0.56695	11	2561	56	24160	Novel00948,gene-KI387_035983,gene-KI387_011850,gene-KI387_035754,gene-KI387_022767,gene-KI387_014383,Novel05342,gene-KI387_017946,gene-KI387_031072,gene-KI387_022290,gene-KI387_011849
GO:0009132	nucleoside diphosphate metabolic process	biological_process	0.030927	0.56695	11	2561	56	24160	gene-KI387_035754,gene-KI387_022767,Novel00948,gene-KI387_035983,gene-KI387_011850,gene-KI387_017946,gene-KI387_031072,gene-KI387_022290,gene-KI387_011849,gene-KI387_014383,Novel05342
GO:0009135	purine nucleoside diphosphate metabolic process	biological_process	0.030927	0.56695	11	2561	56	24160	gene-KI387_022767,gene-KI387_035754,gene-KI387_011850,gene-KI387_035983,Novel00948,gene-KI387_011849,gene-KI387_022290,gene-KI387_031072,gene-KI387_017946,Novel05342,gene-KI387_014383
GO:0009179	purine ribonucleoside diphosphate metabolic process	biological_process	0.030927	0.56695	11	2561	56	24160	gene-KI387_035983,gene-KI387_011850,Novel00948,gene-KI387_022767,gene-KI387_035754,gene-KI387_014383,Novel05342,gene-KI387_011849,gene-KI387_017946,gene-KI387_022290,gene-KI387_031072
GO:0009185	ribonucleoside diphosphate metabolic process	biological_process	0.030927	0.56695	11	2561	56	24160	gene-KI387_014383,Novel05342,gene-KI387_011849,gene-KI387_017946,gene-KI387_031072,gene-KI387_022290,gene-KI387_011850,gene-KI387_035983,Novel00948,gene-KI387_022767,gene-KI387_035754
GO:0046031	ADP metabolic process	biological_process	0.030927	0.56695	11	2561	56	24160	gene-KI387_011850,gene-KI387_035983,Novel00948,gene-KI387_022767,gene-KI387_035754,Novel05342,gene-KI387_014383,gene-KI387_011849,gene-KI387_022290,gene-KI387_031072,gene-KI387_017946
GO:0046939	nucleotide phosphorylation	biological_process	0.030927	0.56695	11	2561	56	24160	gene-KI387_022767,gene-KI387_035754,gene-KI387_011850,gene-KI387_035983,Novel00948,gene-KI387_011849,gene-KI387_017946,gene-KI387_022290,gene-KI387_031072,gene-KI387_014383,Novel05342
GO:1901615	organic hydroxy compound metabolic process	biological_process	0.031727	0.57939	11	2561	59	24160	gene-KI387_042616,gene-KI387_013578,gene-KI387_006250,gene-KI387_010870,gene-KI387_001780,gene-KI387_019509,gene-KI387_011792,gene-KI387_022362,gene-KI387_015349,gene-KI387_011785,gene-KI387_042612
GO:0005744	TIM23 mitochondrial import inner membrane translocase complex	cellular_component	0.03274	0.59558	2	2561	4	24160	gene-KI387_026485,gene-KI387_024718
GO:0072511	divalent inorganic cation transport	biological_process	0.033481	0.60449	11	2561	55	24160	Novel03809,gene-KI387_000588,gene-KI387_018627,gene-KI387_001584,Novel03614,gene-KI387_009714,gene-KI387_007137,gene-KI387_034734,Novel01113,Novel00336,gene-KI387_014584
GO:0044281	small molecule metabolic process	biological_process	0.033523	0.60449	146	2561	1150	24160	gene-KI387_034864,gene-KI387_036183,gene-KI387_032152,gene-KI387_007868,Novel07017,gene-KI387_010870,gene-KI387_008557,gene-KI387_037012,gene-KI387_009489,gene-KI387_034990,gene-KI387_004546,gene-KI387_028643,gene-KI387_016407,Novel04070,Novel02836,gene-KI387_036923,Novel03955,gene-KI387_025073,Novel00496,gene-KI387_014285,gene-KI387_013662,gene-KI387_019408,gene-KI387_009186,gene-KI387_015468,ge…
GO:0016835	carbon-oxygen lyase activity	molecular_function	0.033611	0.60449	24	2561	155	24160	gene-KI387_036227,gene-KI387_028988,gene-KI387_019627,gene-KI387_042576,gene-KI387_038848,Novel04070,gene-KI387_019626,gene-KI387_005815,Novel05750,gene-KI387_021696,gene-KI387_041058,gene-KI387_032476,gene-KI387_010745,gene-KI387_001410,gene-KI387_024757,Novel04036,gene-KI387_021379,gene-KI387_028992,gene-KI387_007772,gene-KI387_028997,gene-KI387_028801,gene-KI387_010602,gene-KI387_014640,gene-K…
GO:0007131	reciprocal meiotic recombination	biological_process	0.034924	0.62338	4	2561	13	24160	Novel01237,Novel00672,Novel00295,gene-KI387_025538
GO:0035825	homologous recombination	biological_process	0.034924	0.62338	4	2561	13	24160	Novel00295,gene-KI387_025538,Novel00672,Novel01237
GO:0006890	retrograde vesicle-mediated transport, Golgi to endoplasmic reticulum	biological_process	0.03536	0.6288	6	2561	22	24160	gene-KI387_022814,gene-KI387_006674,gene-KI387_023267,gene-KI387_022201,gene-KI387_032617,gene-KI387_007858
GO:0016625	oxidoreductase activity, acting on the aldehyde or oxo group of donors, iron-sulfur protein as acceptor	molecular_function	0.035982	0.63747	4	2561	12	24160	gene-KI387_022835,gene-KI387_022745,gene-KI387_026442,gene-KI387_026438
GO:0000271	polysaccharide biosynthetic process	biological_process	0.036516	0.64453	19	2561	110	24160	gene-KI387_013573,gene-KI387_034379,gene-KI387_024485,Novel03092,gene-KI387_034378,gene-KI387_006097,gene-KI387_014584,gene-KI387_015030,gene-KI387_026906,gene-KI387_021402,gene-KI387_034380,gene-KI387_000179,gene-KI387_000177,gene-KI387_014585,Novel03376,gene-KI387_024922,gene-KI387_034276,gene-KI387_024921,gene-KI387_037515
GO:0000030	mannosyltransferase activity	molecular_function	0.038173	0.67129	4	2561	12	24160	Novel04920,gene-KI387_037505,gene-KI387_022221,gene-KI387_026909
GO:0006672	ceramide metabolic process	biological_process	0.038856	0.68077	3	2561	8	24160	gene-KI387_026321,gene-KI387_026320,gene-KI387_020865
GO:0004672	protein kinase activity	molecular_function	0.039202	0.68431	174	2561	1281	24160	gene-KI387_029267,gene-KI387_025763,Novel03490,gene-KI387_014892,gene-KI387_013880,Novel03387,Novel01705,Novel06923,gene-KI387_013982,gene-KI387_034072,gene-KI387_016849,gene-KI387_020291,gene-KI387_031140,Novel00621,gene-KI387_028076,Novel05476,Novel01505,gene-KI387_026186,gene-KI387_038092,gene-KI387_025601,Novel05222,gene-KI387_022601,Novel03722,Novel04289,gene-KI387_008588,gene-KI387_010550,g…
GO:0005783	endoplasmic reticulum	cellular_component	0.039567	0.68566	23	2561	139	24160	Novel06915,gene-KI387_030057,Novel05424,gene-KI387_028330,gene-KI387_006314,Novel05551,gene-KI387_023862,gene-KI387_006902,gene-KI387_015236,gene-KI387_025599,Novel06400,Novel02014,gene-KI387_009479,gene-KI387_023267,gene-KI387_022548,Novel00309,Novel05783,gene-KI387_019429,gene-KI387_011850,gene-KI387_037885,gene-KI387_040413,gene-KI387_034693,gene-KI387_001692
GO:0010181	FMN binding	molecular_function	0.039568	0.68566	12	2561	68	24160	gene-KI387_012134,gene-KI387_014366,gene-KI387_001318,gene-KI387_012131,gene-KI387_029081,gene-KI387_012137,gene-KI387_012132,gene-KI387_012135,gene-KI387_003238,gene-KI387_002119,gene-KI387_002290,Novel00603
GO:0006658	phosphatidylserine metabolic process	biological_process	0.03994	0.68709	2	2561	3	24160	Novel05200,gene-KI387_026390
GO:0006659	phosphatidylserine biosynthetic process	biological_process	0.03994	0.68709	2	2561	3	24160	gene-KI387_026390,Novel05200
GO:0070647	protein modification by small protein conjugation or removal	biological_process	0.040337	0.69141	27	2561	163	24160	gene-KI387_024149,gene-KI387_020614,gene-KI387_038766,gene-KI387_009471,gene-KI387_019629,Novel07267,Novel05276,gene-KI387_021501,gene-KI387_009056,Novel01818,gene-KI387_023125,Novel06334,Novel02401,gene-KI387_007377,gene-KI387_031765,Novel03808,gene-KI387_019631,Novel05145,Novel06691,gene-KI387_003956,Novel03809,gene-KI387_014859,gene-KI387_018689,gene-KI387_036488,gene-KI387_000369,Novel03484,g…
GO:0008171	O-methyltransferase activity	molecular_function	0.041004	0.69353	16	2561	92	24160	gene-KI387_021478,gene-KI387_021829,gene-KI387_019835,Novel02918,gene-KI387_018139,Novel06473,Novel06474,gene-KI387_042806,gene-KI387_019280,Novel03705,gene-KI387_021471,gene-KI387_018140,gene-KI387_002466,gene-KI387_021890,gene-KI387_021476,gene-KI387_019741
GO:0008061	chitin binding	molecular_function	0.041011	0.69353	8	2561	37	24160	Novel07626,Novel04054,gene-KI387_040298,gene-KI387_012774,gene-KI387_014194,gene-KI387_006914,Novel04053,Novel02684
GO:0051321	meiotic cell cycle	biological_process	0.041073	0.69353	9	2561	45	24160	gene-KI387_022362,gene-KI387_025538,gene-KI387_003006,Novel00295,gene-KI387_002849,Novel01237,Novel00672,gene-KI387_002835,gene-KI387_002709
GO:0009308	amine metabolic process	biological_process	0.041217	0.69353	16	2561	89	24160	gene-KI387_009433,gene-KI387_018063,gene-KI387_003318,gene-KI387_012304,gene-KI387_029489,gene-KI387_035760,gene-KI387_012150,gene-KI387_001057,gene-KI387_012305,gene-KI387_003806,gene-KI387_024275,gene-KI387_042919,gene-KI387_003306,gene-KI387_039318,gene-KI387_003309,gene-KI387_008405
GO:0043138	3-5 DNA helicase activity	molecular_function	0.041236	0.69353	4	2561	12	24160	Novel05727,gene-KI387_032005,gene-KI387_014293,Novel05989
GO:0072330	monocarboxylic acid biosynthetic process	biological_process	0.041344	0.69353	16	2561	95	24160	Novel00755,gene-KI387_036923,gene-KI387_020972,gene-KI387_012250,gene-KI387_011758,Novel00672,Novel06459,gene-KI387_039339,gene-KI387_026868,gene-KI387_012059,gene-KI387_019345,gene-KI387_014788,Novel05424,gene-KI387_037648,Novel04839,gene-KI387_027081
GO:0006090	pyruvate metabolic process	biological_process	0.041483	0.69353	11	2561	58	24160	gene-KI387_035983,gene-KI387_011850,Novel00948,gene-KI387_022767,gene-KI387_035754,Novel05342,gene-KI387_014383,gene-KI387_011849,gene-KI387_031072,gene-KI387_022290,gene-KI387_017946
GO:0030976	thiamine pyrophosphate binding	molecular_function	0.041719	0.69502	7	2561	28	24160	gene-KI387_014653,gene-KI387_014654,gene-KI387_039159,gene-KI387_034266,gene-KI387_004306,Novel06680,gene-KI387_028330
GO:0098609	cell-cell adhesion	biological_process	0.042285	0.702	3	2561	8	24160	gene-KI387_018046,Novel03866,Novel01428
GO:0010098	suspensor development	biological_process	0.043171	0.7142	3	2561	7	24160	gene-KI387_018040,gene-KI387_026320,gene-KI387_024760
GO:0016255	attachment of GPI anchor to protein	biological_process	0.044575	0.72937	3	2561	8	24160	gene-KI387_040413,gene-KI387_034693,gene-KI387_023862
GO:0006071	glycerol metabolic process	biological_process	0.044899	0.72937	3	2561	7	24160	gene-KI387_015349,gene-KI387_001780,gene-KI387_010870
GO:0019400	alditol metabolic process	biological_process	0.044899	0.72937	3	2561	7	24160	gene-KI387_010870,gene-KI387_015349,gene-KI387_001780
GO:0016791	phosphatase activity	molecular_function	0.045031	0.72937	32	2561	198	24160	gene-KI387_012918,gene-KI387_028330,gene-KI387_020344,gene-KI387_007975,gene-KI387_012135,gene-KI387_022313,gene-KI387_002048,gene-KI387_003318,gene-KI387_033938,gene-KI387_038096,gene-KI387_004095,gene-KI387_010870,gene-KI387_022266,gene-KI387_022425,gene-KI387_021637,gene-KI387_014859,gene-KI387_003806,Novel00871,gene-KI387_024195,gene-KI387_022348,gene-KI387_013473,gene-KI387_007414,gene-KI387…
GO:0004645	1,4-alpha-oligoglucan phosphorylase activity	molecular_function	0.045059	0.72937	3	2561	7	24160	gene-KI387_023395,Novel04564,gene-KI387_017651
GO:0008184	glycogen phosphorylase activity	molecular_function	0.045059	0.72937	3	2561	7	24160	gene-KI387_023395,Novel04564,gene-KI387_017651
GO:0019953	sexual reproduction	biological_process	0.045494	0.72937	14	2561	80	24160	gene-KI387_031222,gene-KI387_037340,gene-KI387_016369,gene-KI387_006186,gene-KI387_024079,gene-KI387_016967,Novel05925,Novel02718,gene-KI387_035742,Novel00672,gene-KI387_036274,Novel00295,gene-KI387_031230,gene-KI387_004765
GO:0044703	multi-organism reproductive process	biological_process	0.045494	0.72937	14	2561	80	24160	gene-KI387_024079,gene-KI387_006186,gene-KI387_016967,Novel05925,gene-KI387_037340,gene-KI387_016369,gene-KI387_031222,gene-KI387_031230,gene-KI387_004765,Novel00295,Novel00672,gene-KI387_035742,gene-KI387_036274,Novel02718
GO:0006812	cation transport	biological_process	0.045731	0.72937	99	2561	779	24160	gene-KI387_020801,Novel07069,gene-KI387_008808,gene-KI387_026421,gene-KI387_014750,gene-KI387_018341,gene-KI387_014653,gene-KI387_014772,gene-KI387_034734,gene-KI387_018689,gene-KI387_019418,Novel03809,Novel02002,gene-KI387_020139,gene-KI387_029882,gene-KI387_033235,gene-KI387_025126,gene-KI387_000872,Novel01686,gene-KI387_027147,gene-KI387_010745,gene-KI387_019016,gene-KI387_014584,gene-KI387_01…
GO:0050840	extracellular matrix binding	molecular_function	0.045795	0.72937	3	2561	8	24160	gene-KI387_003208,Novel05930,Novel05932
GO:0016620	oxidoreductase activity, acting on the aldehyde or oxo group of donors, NAD or NADP as acceptor	molecular_function	0.045805	0.72937	10	2561	50	24160	gene-KI387_033741,gene-KI387_039188,gene-KI387_011705,gene-KI387_021590,gene-KI387_011587,gene-KI387_027202,gene-KI387_021598,gene-KI387_011918,gene-KI387_026259,gene-KI387_024281
GO:1901607	alpha-amino acid biosynthetic process	biological_process	0.045931	0.72937	20	2561	124	24160	gene-KI387_021590,gene-KI387_032808,gene-KI387_007772,gene-KI387_031012,gene-KI387_031855,gene-KI387_022362,Novel06400,gene-KI387_012059,gene-KI387_030917,gene-KI387_019408,gene-KI387_011758,gene-KI387_017695,gene-KI387_015468,gene-KI387_024757,gene-KI387_011705,gene-KI387_036183,gene-KI387_042576,gene-KI387_037286,Novel04070,gene-KI387_032801
GO:0046983	protein dimerization activity	molecular_function	0.046404	0.73443	57	2561	419	24160	gene-KI387_014164,gene-KI387_004134,gene-KI387_022201,gene-KI387_028824,Novel06050,gene-KI387_009519,gene-KI387_008668,Novel04412,gene-KI387_021471,gene-KI387_023268,gene-KI387_019280,gene-KI387_000711,gene-KI387_007526,gene-KI387_027436,gene-KI387_018325,gene-KI387_007797,gene-KI387_036306,gene-KI387_028819,gene-KI387_021476,gene-KI387_021478,gene-KI387_044692,Novel03466,gene-KI387_026002,gene-K…
GO:0030247	polysaccharide binding	molecular_function	0.047031	0.73959	14	2561	73	24160	gene-KI387_010729,gene-KI387_021339,gene-KI387_009471,gene-KI387_013064,gene-KI387_035497,Novel06698,gene-KI387_010701,gene-KI387_002973,gene-KI387_031342,gene-KI387_035499,Novel01428,gene-KI387_007375,gene-KI387_010734,gene-KI387_023125
GO:0006753	nucleoside phosphate metabolic process	biological_process	0.047042	0.73959	39	2561	280	24160	gene-KI387_004986,Novel05342,gene-KI387_014383,gene-KI387_002048,gene-KI387_035754,gene-KI387_022767,Novel05887,gene-KI387_035983,gene-KI387_022290,gene-KI387_024769,gene-KI387_035280,Novel00407,gene-KI387_003207,gene-KI387_035919,gene-KI387_008557,gene-KI387_028236,gene-KI387_034894,gene-KI387_004168,gene-KI387_009991,gene-KI387_038959,gene-KI387_014772,gene-KI387_009463,Novel07069,Novel00948,ge…
GO:0005665	RNA polymerase II, core complex	cellular_component	0.047269	0.7407	2	2561	3	24160	gene-KI387_006093,gene-KI387_005470
GO:0035251	UDP-glucosyltransferase activity	molecular_function	0.048005	0.74976	17	2561	95	24160	gene-KI387_034379,gene-KI387_024485,gene-KI387_034378,gene-KI387_013573,gene-KI387_025580,gene-KI387_026906,gene-KI387_006097,gene-KI387_014584,gene-KI387_019070,gene-KI387_014585,gene-KI387_021402,gene-KI387_034380,gene-KI387_000177,gene-KI387_000179,gene-KI387_031081,gene-KI387_024921,gene-KI387_024922
GO:0009496	plastoquinol--plastocyanin reductase activity	molecular_function	0.049475	0.764	2	2561	4	24160	gene-KI387_037434,gene-KI387_017324
GO:0052880	oxidoreductase activity, acting on diphenols and related substances as donors, with copper protein as acceptor	molecular_function	0.049475	0.764	2	2561	4	24160	gene-KI387_037434,gene-KI387_017324
GO:0008657	DNA topoisomerase type II (double strand cut, ATP-hydrolyzing) inhibitor activity	molecular_function	0.050033	0.764	1	2561	1	24160	Novel02032
GO:0072586	DNA topoisomerase type II (double strand cut, ATP-hydrolyzing) regulator activity	molecular_function	0.050033	0.764	1	2561	1	24160	Novel02032
GO:0003871	5-methyltetrahydropteroyltriglutamate-homocysteine S-methyltransferase activity	molecular_function	0.0503	0.764	3	2561	7	24160	Novel06400,gene-KI387_031012,gene-KI387_017695
GO:0042085	5-methyltetrahydropteroyltri-L-glutamate-dependent methyltransferase activity	molecular_function	0.0503	0.764	3	2561	7	24160	Novel06400,gene-KI387_031012,gene-KI387_017695
GO:0009150	purine ribonucleotide metabolic process	biological_process	0.050458	0.764	32	2561	225	24160	gene-KI387_014772,gene-KI387_009991,gene-KI387_038959,gene-KI387_026339,gene-KI387_022690,Novel07069,Novel00948,gene-KI387_009463,gene-KI387_037409,gene-KI387_030597,gene-KI387_025064,gene-KI387_005181,gene-KI387_011850,gene-KI387_019016,gene-KI387_011849,gene-KI387_017946,gene-KI387_013958,gene-KI387_031072,gene-KI387_022767,gene-KI387_035754,gene-KI387_035983,Novel05887,gene-KI387_004986,gene-K…
GO:0033925	mannosyl-glycoprotein endo-beta-N-acetylglucosaminidase activity	molecular_function	0.050505	0.764	2	2561	3	24160	gene-KI387_037140,gene-KI387_037139
GO:0022414	reproductive process	biological_process	0.050535	0.764	41	2561	301	24160	Novel01237,gene-KI387_031493,gene-KI387_035742,gene-KI387_036274,gene-KI387_037606,Novel00295,Novel03387,gene-KI387_037340,Novel02622,Novel05925,gene-KI387_024079,gene-KI387_034072,Novel02718,Novel00672,Novel03073,gene-KI387_008526,gene-KI387_003006,gene-KI387_025538,Novel01099,Novel06233,gene-KI387_037505,Novel03382,gene-KI387_002709,Novel04499,gene-KI387_006186,gene-KI387_006440,gene-KI387_0185…
GO:0055086	nucleobase-containing small molecule metabolic process	biological_process	0.050634	0.764	47	2561	339	24160	gene-KI387_032162,gene-KI387_005263,gene-KI387_028236,gene-KI387_034894,gene-KI387_035919,gene-KI387_008557,gene-KI387_043267,gene-KI387_022290,gene-KI387_024769,gene-KI387_035280,gene-KI387_003207,Novel00407,Novel05887,gene-KI387_035983,gene-KI387_035754,gene-KI387_022767,Novel05342,gene-KI387_014383,gene-KI387_002048,gene-KI387_032152,gene-KI387_004986,gene-KI387_030823,gene-KI387_019016,gene-K…
GO:0008652	cellular amino acid biosynthetic process	biological_process	0.050687	0.764	23	2561	145	24160	Novel06400,gene-KI387_022362,gene-KI387_012059,gene-KI387_031012,gene-KI387_031855,gene-KI387_017695,gene-KI387_011758,gene-KI387_015468,gene-KI387_024757,gene-KI387_019408,gene-KI387_030917,gene-KI387_032476,gene-KI387_032808,gene-KI387_021590,gene-KI387_007772,Novel04070,gene-KI387_032801,gene-KI387_042576,gene-KI387_037286,gene-KI387_024281,gene-KI387_022988,gene-KI387_011705,gene-KI387_036183
GO:0016854	racemase and epimerase activity	molecular_function	0.051356	0.77163	6	2561	25	24160	gene-KI387_032801,gene-KI387_027081,gene-KI387_030823,Novel01219,gene-KI387_000339,Novel01337
GO:0009117	nucleotide metabolic process	biological_process	0.051947	0.77301	38	2561	273	24160	Novel05342,gene-KI387_014383,gene-KI387_002048,gene-KI387_004986,Novel05887,gene-KI387_035983,gene-KI387_035754,gene-KI387_022767,gene-KI387_035919,gene-KI387_008557,gene-KI387_022290,gene-KI387_024769,gene-KI387_035280,gene-KI387_003207,Novel00407,gene-KI387_028236,gene-KI387_034894,gene-KI387_009463,Novel07069,Novel00948,gene-KI387_026339,gene-KI387_022690,gene-KI387_009991,gene-KI387_038959,ge…
GO:0005759	mitochondrial matrix	cellular_component	0.052252	0.77301	5	2561	20	24160	gene-KI387_030933,gene-KI387_032632,gene-KI387_024718,Novel03051,gene-KI387_019313
GO:0009259	ribonucleotide metabolic process	biological_process	0.052415	0.77301	32	2561	226	24160	gene-KI387_019016,gene-KI387_011850,gene-KI387_025064,gene-KI387_030597,gene-KI387_037409,gene-KI387_005181,gene-KI387_011849,gene-KI387_031072,gene-KI387_013958,gene-KI387_017946,gene-KI387_026339,gene-KI387_022690,gene-KI387_009463,Novel00948,Novel07069,gene-KI387_014772,gene-KI387_038959,gene-KI387_009991,gene-KI387_034894,gene-KI387_028236,gene-KI387_008557,gene-KI387_035919,Novel00407,gene-K…
GO:0019693	ribose phosphate metabolic process	biological_process	0.052415	0.77301	32	2561	226	24160	gene-KI387_014772,gene-KI387_009991,gene-KI387_038959,gene-KI387_026339,gene-KI387_022690,gene-KI387_009463,Novel07069,Novel00948,gene-KI387_011849,gene-KI387_031072,gene-KI387_013958,gene-KI387_017946,gene-KI387_025064,gene-KI387_037409,gene-KI387_030597,gene-KI387_005181,gene-KI387_019016,gene-KI387_011850,gene-KI387_004986,Novel05342,gene-KI387_014383,gene-KI387_022767,gene-KI387_035754,gene-K…
GO:0005741	mitochondrial outer membrane	cellular_component	0.052424	0.77301	13	2561	76	24160	gene-KI387_002738,Novel03630,gene-KI387_025599,Novel03171,Novel05424,gene-KI387_033647,gene-KI387_002742,gene-KI387_002736,gene-KI387_023268,gene-KI387_044328,gene-KI387_036235,gene-KI387_018129,gene-KI387_018241
GO:0031968	organelle outer membrane	cellular_component	0.052424	0.77301	13	2561	76	24160	Novel05424,Novel03630,gene-KI387_025599,Novel03171,gene-KI387_002738,gene-KI387_018241,gene-KI387_018129,gene-KI387_044328,gene-KI387_036235,gene-KI387_002736,gene-KI387_023268,gene-KI387_033647,gene-KI387_002742
GO:0005811	lipid droplet	cellular_component	0.054373	0.79432	4	2561	15	24160	gene-KI387_014280,gene-KI387_008243,gene-KI387_012630,gene-KI387_014283
GO:0012511	monolayer-surrounded lipid storage body	cellular_component	0.054373	0.79432	4	2561	15	24160	gene-KI387_008243,gene-KI387_012630,gene-KI387_014283,gene-KI387_014280
GO:0001405	PAM complex, Tim23 associated import motor	cellular_component	0.054644	0.79432	1	2561	1	24160	gene-KI387_024718
GO:0045132	meiotic chromosome segregation	biological_process	0.054719	0.79432	4	2561	14	24160	Novel00295,gene-KI387_002709,gene-KI387_003006,Novel00672
GO:0004664	prephenate dehydratase activity	molecular_function	0.05504	0.79432	3	2561	7	24160	gene-KI387_007772,Novel04070,gene-KI387_042576
GO:0009094	L-phenylalanine biosynthetic process	biological_process	0.05504	0.79432	3	2561	7	24160	gene-KI387_007772,gene-KI387_042576,Novel04070
GO:1902223	erythrose 4-phosphate/phosphoenolpyruvate family amino acid biosynthetic process	biological_process	0.05504	0.79432	3	2561	7	24160	gene-KI387_042576,Novel04070,gene-KI387_007772
GO:0048609	multicellular organismal reproductive process	biological_process	0.055547	0.7992	10	2561	56	24160	gene-KI387_016967,Novel05925,gene-KI387_016369,gene-KI387_031222,gene-KI387_031230,gene-KI387_004765,Novel00295,gene-KI387_035742,Novel00672,Novel02718
GO:0019867	outer membrane	cellular_component	0.056536	0.80792	22	2561	145	24160	Novel03210,gene-KI387_018241,gene-KI387_020139,gene-KI387_036235,gene-KI387_002736,Novel07247,gene-KI387_002742,gene-KI387_038033,Novel05424,gene-KI387_028953,gene-KI387_018129,gene-KI387_044328,Novel02869,gene-KI387_023268,gene-KI387_033647,gene-KI387_023267,Novel01765,Novel03630,gene-KI387_025599,Novel03171,gene-KI387_002738,gene-KI387_020629
GO:0005247	voltage-gated chloride channel activity	molecular_function	0.056833	0.80792	5	2561	18	24160	gene-KI387_007805,gene-KI387_027972,gene-KI387_013451,gene-KI387_009627,gene-KI387_030556
GO:0005254	chloride channel activity	molecular_function	0.056833	0.80792	5	2561	18	24160	gene-KI387_007805,gene-KI387_027972,gene-KI387_013451,gene-KI387_009627,gene-KI387_030556
GO:0008308	voltage-gated anion channel activity	molecular_function	0.056833	0.80792	5	2561	18	24160	gene-KI387_007805,gene-KI387_027972,gene-KI387_013451,gene-KI387_009627,gene-KI387_030556
GO:0009250	glucan biosynthetic process	biological_process	0.058871	0.83138	15	2561	85	24160	Novel03376,gene-KI387_006097,gene-KI387_014584,gene-KI387_024922,gene-KI387_026906,gene-KI387_024921,gene-KI387_013573,gene-KI387_021402,gene-KI387_000179,gene-KI387_000177,gene-KI387_034380,gene-KI387_014585,gene-KI387_034379,gene-KI387_024485,gene-KI387_034378
GO:1901642	nucleoside transmembrane transport	biological_process	0.058915	0.83138	3	2561	9	24160	gene-KI387_001099,gene-KI387_011538,gene-KI387_001098
GO:0006575	cellular modified amino acid metabolic process	biological_process	0.059203	0.83138	11	2561	61	24160	gene-KI387_031734,gene-KI387_010362,gene-KI387_003140,gene-KI387_027081,Novel03338,gene-KI387_014788,Novel05200,gene-KI387_024812,gene-KI387_036923,gene-KI387_026390,gene-KI387_021877
GO:0009793	embryo development ending in seed dormancy	biological_process	0.059885	0.83138	2	2561	4	24160	Novel02621,Novel02622
GO:0010154	fruit development	biological_process	0.059885	0.83138	2	2561	4	24160	Novel02622,Novel02621
GO:0048316	seed development	biological_process	0.059885	0.83138	2	2561	4	24160	Novel02621,Novel02622
GO:0048608	reproductive structure development	biological_process	0.059885	0.83138	2	2561	4	24160	Novel02621,Novel02622
GO:0061458	reproductive system development	biological_process	0.059885	0.83138	2	2561	4	24160	Novel02622,Novel02621
GO:1901136	carbohydrate derivative catabolic process	biological_process	0.060225	0.83367	13	2561	80	24160	gene-KI387_012882,gene-KI387_028447,Novel05537,gene-KI387_014194,gene-KI387_030645,gene-KI387_014527,gene-KI387_006914,gene-KI387_012774,gene-KI387_002048,gene-KI387_020865,gene-KI387_014525,gene-KI387_014285,gene-KI387_014528
GO:0033692	cellular polysaccharide biosynthetic process	biological_process	0.061609	0.84845	17	2561	101	24160	gene-KI387_021402,gene-KI387_034380,gene-KI387_000177,gene-KI387_000179,gene-KI387_014585,Novel03376,gene-KI387_034276,gene-KI387_024922,gene-KI387_024921,gene-KI387_013573,gene-KI387_034379,gene-KI387_024485,gene-KI387_034378,gene-KI387_006097,gene-KI387_015030,gene-KI387_014584,gene-KI387_026906
GO:0005520	insulin-like growth factor binding	molecular_function	0.061829	0.84845	2	2561	4	24160	gene-KI387_028521,Novel00856
GO:0019838	growth factor binding	molecular_function	0.061829	0.84845	2	2561	4	24160	gene-KI387_028521,Novel00856
GO:0000746	conjugation	biological_process	0.062722	0.85453	6	2561	24	24160	gene-KI387_038033,gene-KI387_023091,gene-KI387_036274,gene-KI387_037340,gene-KI387_006186,gene-KI387_024079
GO:0007617	mating behavior	biological_process	0.062812	0.85453	3	2561	8	24160	Novel05925,Novel02718,gene-KI387_031222
GO:0019098	reproductive behavior	biological_process	0.062812	0.85453	3	2561	8	24160	Novel05925,Novel02718,gene-KI387_031222
GO:0060090	molecular adaptor activity	molecular_function	0.06353	0.86183	6	2561	26	24160	Novel04168,gene-KI387_006674,gene-KI387_017189,gene-KI387_017185,gene-KI387_023267,gene-KI387_022201
GO:0006749	glutathione metabolic process	biological_process	0.064588	0.8701	6	2561	27	24160	gene-KI387_021877,gene-KI387_031734,Novel03338,gene-KI387_003140,gene-KI387_010362,gene-KI387_024812
GO:0060589	nucleoside-triphosphatase regulator activity	molecular_function	0.064694	0.8701	16	2561	104	24160	gene-KI387_031388,gene-KI387_022777,gene-KI387_032638,Novel02032,Novel01958,gene-KI387_018510,Novel05551,gene-KI387_012267,gene-KI387_032081,Novel04574,gene-KI387_010311,gene-KI387_018004,gene-KI387_037333,gene-KI387_008480,gene-KI387_025344,gene-KI387_022201
GO:0009073	aromatic amino acid family biosynthetic process	biological_process	0.064717	0.8701	10	2561	53	24160	gene-KI387_007772,Novel04070,gene-KI387_022362,gene-KI387_042576,gene-KI387_031855,gene-KI387_022988,gene-KI387_024757,gene-KI387_030917,gene-KI387_019408,gene-KI387_032476
GO:1901605	alpha-amino acid metabolic process	biological_process	0.065215	0.8701	27	2561	180	24160	gene-KI387_032801,Novel04070,Novel07017,gene-KI387_012305,gene-KI387_037286,gene-KI387_042576,gene-KI387_004986,gene-KI387_012304,gene-KI387_011705,gene-KI387_036183,gene-KI387_012059,Novel06400,gene-KI387_022362,gene-KI387_031012,gene-KI387_031855,gene-KI387_024757,gene-KI387_017695,gene-KI387_015468,gene-KI387_011758,gene-KI387_030917,gene-KI387_019408,gene-KI387_032808,gene-KI387_037012,gene-K…
GO:0006030	chitin metabolic process	biological_process	0.065239	0.8701	8	2561	43	24160	gene-KI387_014525,gene-KI387_023039,gene-KI387_014528,gene-KI387_028447,gene-KI387_012774,gene-KI387_006914,gene-KI387_014527,gene-KI387_014194
GO:1901071	glucosamine-containing compound metabolic process	biological_process	0.065239	0.8701	8	2561	43	24160	gene-KI387_014528,gene-KI387_023039,gene-KI387_014525,gene-KI387_006914,gene-KI387_014527,gene-KI387_014194,gene-KI387_012774,gene-KI387_028447
GO:0044877	protein-containing complex binding	molecular_function	0.065528	0.87082	28	2561	193	24160	gene-KI387_017746,gene-KI387_037606,gene-KI387_020451,gene-KI387_017189,gene-KI387_028330,Novel01054,Novel04168,gene-KI387_037271,gene-KI387_019081,gene-KI387_030824,gene-KI387_017185,gene-KI387_042781,gene-KI387_028126,gene-KI387_036306,gene-KI387_021451,Novel05555,gene-KI387_037409,gene-KI387_023267,gene-KI387_011006,Novel00649,gene-KI387_020453,gene-KI387_020351,gene-KI387_002835,gene-KI387_02…
GO:0004590	orotidine-5-phosphate decarboxylase activity	molecular_function	0.065844	0.87082	2	2561	4	24160	gene-KI387_025073,gene-KI387_030823
GO:0006207	de novo pyrimidine nucleobase biosynthetic process	biological_process	0.065844	0.87082	2	2561	4	24160	gene-KI387_025073,gene-KI387_030823
GO:0043189	H4/H2A histone acetyltransferase complex	cellular_component	0.066739	0.87507	1	2561	1	24160	gene-KI387_031027
GO:1902562	H4 histone acetyltransferase complex	cellular_component	0.066739	0.87507	1	2561	1	24160	gene-KI387_031027
GO:0016540	protein autoprocessing	biological_process	0.066828	0.87507	2	2561	4	24160	gene-KI387_018398,gene-KI387_018395
GO:0000413	protein peptidyl-prolyl isomerization	biological_process	0.067256	0.87507	6	2561	29	24160	gene-KI387_029199,gene-KI387_020175,gene-KI387_005730,Novel04355,Novel07396,gene-KI387_019555
GO:0018208	peptidyl-proline modification	biological_process	0.067256	0.87507	6	2561	29	24160	gene-KI387_020175,gene-KI387_029199,gene-KI387_005730,Novel04355,gene-KI387_019555,Novel07396
GO:0008173	RNA methyltransferase activity	molecular_function	0.067271	0.87507	13	2561	72	24160	Novel07116,gene-KI387_013487,gene-KI387_028580,gene-KI387_006188,gene-KI387_030823,gene-KI387_006187,gene-KI387_011450,gene-KI387_023692,gene-KI387_027813,gene-KI387_033528,Novel00140,gene-KI387_036906,gene-KI387_019145
GO:0004930	G protein-coupled receptor activity	molecular_function	0.067973	0.8818	8	2561	40	24160	gene-KI387_032373,gene-KI387_028491,gene-KI387_036274,gene-KI387_015465,gene-KI387_009471,gene-KI387_022425,gene-KI387_005536,gene-KI387_016526
GO:0006026	aminoglycan catabolic process	biological_process	0.068553	0.88689	9	2561	52	24160	gene-KI387_012882,Novel05537,gene-KI387_028447,gene-KI387_014527,gene-KI387_006914,gene-KI387_014194,gene-KI387_012774,gene-KI387_014525,gene-KI387_014528
GO:0042219	cellular modified amino acid catabolic process	biological_process	0.069127	0.88947	4	2561	15	24160	Novel03338,gene-KI387_010362,gene-KI387_024812,gene-KI387_021877
GO:0044273	sulfur compound catabolic process	biological_process	0.069127	0.88947	4	2561	15	24160	gene-KI387_021877,gene-KI387_024812,gene-KI387_010362,Novel03338
GO:0000160	phosphorelay signal transduction system	biological_process	0.069675	0.89195	15	2561	86	24160	gene-KI387_008351,gene-KI387_026509,gene-KI387_024641,gene-KI387_005156,gene-KI387_019346,gene-KI387_026663,gene-KI387_013595,gene-KI387_029628,gene-KI387_025888,gene-KI387_016849,Novel00840,gene-KI387_018044,gene-KI387_035882,gene-KI387_018956,gene-KI387_026365
GO:0000097	sulfur amino acid biosynthetic process	biological_process	0.069695	0.89195	4	2561	13	24160	gene-KI387_017695,Novel06400,gene-KI387_032808,gene-KI387_031012
GO:0006040	amino sugar metabolic process	biological_process	0.070485	0.89789	9	2561	50	24160	gene-KI387_023039,gene-KI387_014525,gene-KI387_014528,Novel01219,gene-KI387_028447,gene-KI387_014194,gene-KI387_014527,gene-KI387_006914,gene-KI387_012774
GO:0008375	acetylglucosaminyltransferase activity	molecular_function	0.07062	0.89789	6	2561	26	24160	Novel03544,gene-KI387_012178,gene-KI387_014123,gene-KI387_023039,gene-KI387_000104,gene-KI387_034241
GO:0018193	peptidyl-amino acid modification	biological_process	0.071023	0.89789	14	2561	80	24160	gene-KI387_035271,gene-KI387_029199,Novel07396,Novel04355,gene-KI387_026663,Novel01085,gene-KI387_005156,gene-KI387_005730,gene-KI387_037501,gene-KI387_016849,gene-KI387_020175,gene-KI387_019555,gene-KI387_026365,gene-KI387_014579
GO:0046540	U4/U6 x U5 tri-snRNP complex	cellular_component	0.071327	0.89789	2	2561	6	24160	gene-KI387_023612,gene-KI387_026888
GO:0097526	spliceosomal tri-snRNP complex	cellular_component	0.071327	0.89789	2	2561	6	24160	gene-KI387_023612,gene-KI387_026888
GO:0006022	aminoglycan metabolic process	biological_process	0.071385	0.89789	10	2561	59	24160	gene-KI387_014528,gene-KI387_014525,gene-KI387_023039,gene-KI387_012774,gene-KI387_014194,gene-KI387_006914,gene-KI387_014527,gene-KI387_028447,Novel05537,gene-KI387_012882
GO:0015108	chloride transmembrane transporter activity	molecular_function	0.071483	0.89789	5	2561	19	24160	gene-KI387_030556,gene-KI387_013451,gene-KI387_009627,gene-KI387_027972,gene-KI387_007805
GO:0070840	dynein complex binding	molecular_function	0.071762	0.89901	9	2561	49	24160	gene-KI387_042781,gene-KI387_037271,gene-KI387_008668,gene-KI387_002835,gene-KI387_023268,gene-KI387_023267,gene-KI387_037606,Novel05555,gene-KI387_036306
GO:0032504	multicellular organism reproduction	biological_process	0.072253	0.90244	10	2561	59	24160	Novel05925,gene-KI387_016967,gene-KI387_031222,gene-KI387_016369,Novel00295,gene-KI387_031230,gene-KI387_004765,Novel02718,gene-KI387_035742,Novel00672
GO:0032787	monocarboxylic acid metabolic process	biological_process	0.072416	0.90244	36	2561	257	24160	gene-KI387_035983,gene-KI387_007868,gene-KI387_027081,gene-KI387_022767,Novel04839,gene-KI387_037648,gene-KI387_035754,Novel05342,gene-KI387_014383,gene-KI387_039339,Novel06459,gene-KI387_009489,gene-KI387_036098,gene-KI387_039315,gene-KI387_020972,gene-KI387_022290,Novel05424,Novel00948,gene-KI387_014788,gene-KI387_014285,gene-KI387_011850,Novel00672,gene-KI387_011758,gene-KI387_019345,gene-KI38…
GO:1901068	guanosine-containing compound metabolic process	biological_process	0.072699	0.90248	3	2561	8	24160	gene-KI387_009991,gene-KI387_008557,gene-KI387_022690
GO:0006790	sulfur compound metabolic process	biological_process	0.072799	0.90248	19	2561	117	24160	gene-KI387_003140,gene-KI387_017695,gene-KI387_031734,Novel06400,gene-KI387_031012,gene-KI387_012851,Novel03338,gene-KI387_021877,gene-KI387_037012,gene-KI387_032808,Novel05423,Novel03955,gene-KI387_010362,gene-KI387_014162,Novel07017,gene-KI387_022421,gene-KI387_024812,gene-KI387_002853,gene-KI387_037240
GO:0008484	sulfuric ester hydrolase activity	molecular_function	0.073051	0.90325	3	2561	9	24160	gene-KI387_034894,gene-KI387_012571,Novel02224
GO:0004018	N6-(1,2-dicarboxyethyl)AMP AMP-lyase (fumarate-forming) activity	molecular_function	0.07339	0.90508	2	2561	4	24160	gene-KI387_005181,gene-KI387_004986
GO:0051274	beta-glucan biosynthetic process	biological_process	0.074724	0.91857	14	2561	81	24160	gene-KI387_034378,gene-KI387_034379,gene-KI387_014585,gene-KI387_024485,gene-KI387_000177,gene-KI387_034380,gene-KI387_000179,gene-KI387_021402,gene-KI387_013573,gene-KI387_026906,gene-KI387_024921,gene-KI387_014584,gene-KI387_024922,gene-KI387_006097
GO:0004809	tRNA (guanine-N2-)-methyltransferase activity	molecular_function	0.074871	0.91857	2	2561	4	24160	gene-KI387_006188,gene-KI387_006187
GO:0001522	pseudouridine synthesis	biological_process	0.076667	0.93293	6	2561	25	24160	gene-KI387_035541,Novel00158,gene-KI387_002582,Novel00259,Novel06050,gene-KI387_019063
GO:0031090	organelle membrane	cellular_component	0.076786	0.93293	79	2561	626	24160	Novel03789,gene-KI387_007472,Novel05783,Novel02621,Novel00407,gene-KI387_033647,gene-KI387_008350,gene-KI387_034693,gene-KI387_038848,gene-KI387_010752,Novel07044,gene-KI387_002742,gene-KI387_002736,gene-KI387_023862,gene-KI387_018241,gene-KI387_009479,gene-KI387_025064,gene-KI387_015236,Novel06400,Novel04920,Novel03812,gene-KI387_012216,gene-KI387_019016,gene-KI387_011006,Novel00309,gene-KI387_0…
GO:0005096	GTPase activator activity	molecular_function	0.076795	0.93293	9	2561	52	24160	Novel01958,gene-KI387_012267,Novel04574,gene-KI387_031388,gene-KI387_022777,gene-KI387_032638,gene-KI387_010311,gene-KI387_018004,gene-KI387_037333
GO:0016998	cell wall macromolecule catabolic process	biological_process	0.076827	0.93293	7	2561	39	24160	Novel05537,gene-KI387_014525,gene-KI387_028447,gene-KI387_014528,gene-KI387_006914,gene-KI387_014527,gene-KI387_014194
GO:1901362	organic cyclic compound biosynthetic process	biological_process	0.078177	0.9469	295	2561	2507	24160	gene-KI387_032850,gene-KI387_036183,gene-KI387_010321,gene-KI387_012823,gene-KI387_007975,gene-KI387_001414,gene-KI387_012217,Novel01918,gene-KI387_027652,gene-KI387_020391,gene-KI387_027969,gene-KI387_030920,Novel03705,gene-KI387_016790,gene-KI387_034627,gene-KI387_020139,gene-KI387_009252,Novel00594,gene-KI387_037606,gene-KI387_031493,gene-KI387_025073,gene-KI387_021471,gene-KI387_028824,gene-K…
GO:0098754	detoxification	biological_process	0.078984	0.94889	6	2561	28	24160	Novel02607,gene-KI387_014584,gene-KI387_034734,Novel01113,Novel00336,Novel03955
GO:1901617	organic hydroxy compound biosynthetic process	biological_process	0.079891	0.94889	6	2561	32	24160	gene-KI387_042612,gene-KI387_022362,gene-KI387_019509,gene-KI387_042616,gene-KI387_013578,gene-KI387_006250
GO:0030695	GTPase regulator activity	molecular_function	0.080064	0.94889	11	2561	66	24160	gene-KI387_037333,gene-KI387_010311,gene-KI387_018004,gene-KI387_022777,gene-KI387_032638,gene-KI387_031388,Novel04574,gene-KI387_032081,gene-KI387_012267,Novel01958,gene-KI387_025344
GO:0030119	AP-type membrane coat adaptor complex	cellular_component	0.080289	0.94889	4	2561	14	24160	gene-KI387_006304,gene-KI387_008667,Novel05632,gene-KI387_040351
GO:0098798	mitochondrial protein complex	cellular_component	0.080349	0.94889	26	2561	180	24160	gene-KI387_019016,gene-KI387_030547,gene-KI387_002738,gene-KI387_034894,gene-KI387_025064,gene-KI387_007472,Novel03630,gene-KI387_025599,gene-KI387_030933,Novel03171,gene-KI387_044328,gene-KI387_008350,Novel04667,Novel00407,gene-KI387_035280,gene-KI387_032632,Novel05424,Novel07069,Novel07044,gene-KI387_024718,gene-KI387_010752,gene-KI387_026485,gene-KI387_014772,gene-KI387_036235,gene-KI387_00274…
GO:0005750	mitochondrial respiratory chain complex III	cellular_component	0.080356	0.94889	2	2561	5	24160	gene-KI387_007472,Novel07044
GO:0006122	mitochondrial electron transport, ubiquinol to cytochrome c	biological_process	0.080356	0.94889	2	2561	5	24160	Novel07044,gene-KI387_007472
GO:0045275	respiratory chain complex III	cellular_component	0.080356	0.94889	2	2561	5	24160	gene-KI387_007472,Novel07044
GO:0000209	protein polyubiquitination	biological_process	0.08054	0.94889	1	2561	1	24160	gene-KI387_014859
GO:0008063	Toll signaling pathway	biological_process	0.08054	0.94889	1	2561	1	24160	gene-KI387_014859
GO:0008592	regulation of Toll signaling pathway	biological_process	0.08054	0.94889	1	2561	1	24160	gene-KI387_014859
GO:0003864	3-methyl-2-oxobutanoate hydroxymethyltransferase activity	molecular_function	0.081719	0.95914	2	2561	4	24160	gene-KI387_027081,gene-KI387_036923
GO:0004932	mating-type factor pheromone receptor activity	molecular_function	0.082209	0.95914	2	2561	6	24160	gene-KI387_015465,gene-KI387_028491
GO:0046173	polyol biosynthetic process	biological_process	0.082429	0.95914	4	2561	20	24160	gene-KI387_042616,gene-KI387_006250,gene-KI387_019509,gene-KI387_042612
GO:0042803	protein homodimerization activity	molecular_function	0.082577	0.95914	11	2561	65	24160	gene-KI387_008668,gene-KI387_037271,gene-KI387_023268,gene-KI387_002835,gene-KI387_042781,gene-KI387_022201,Novel05555,gene-KI387_036306,gene-KI387_000711,gene-KI387_023267,gene-KI387_037606
GO:0009112	nucleobase metabolic process	biological_process	0.082622	0.95914	4	2561	14	24160	gene-KI387_030823,gene-KI387_025073,gene-KI387_035541,gene-KI387_005263
GO:0046112	nucleobase biosynthetic process	biological_process	0.082622	0.95914	4	2561	14	24160	gene-KI387_035541,gene-KI387_025073,gene-KI387_005263,gene-KI387_030823
GO:0004420	hydroxymethylglutaryl-CoA reductase (NADPH) activity	molecular_function	0.083099	0.96233	2	2561	5	24160	gene-KI387_013958,gene-KI387_030597
GO:0004489	methylenetetrahydrofolate reductase (NAD(P)H) activity	molecular_function	0.083478	0.96436	2	2561	4	24160	Novel03955,gene-KI387_037012
GO:0005253	anion channel activity	molecular_function	0.085296	0.98297	5	2561	21	24160	gene-KI387_007805,gene-KI387_027972,gene-KI387_009627,gene-KI387_013451,gene-KI387_030556
GO:0016742	hydroxymethyl-, formyl- and related transferase activity	molecular_function	0.086056	0.98933	3	2561	9	24160	gene-KI387_036923,gene-KI387_003207,gene-KI387_027081
GO:0016838	carbon-oxygen lyase activity, acting on phosphates	molecular_function	0.087319	1	14	2561	92	24160	gene-KI387_028801,gene-KI387_028997,gene-KI387_019626,gene-KI387_028802,gene-KI387_010602,Novel04036,gene-KI387_019627,gene-KI387_028988,gene-KI387_010745,gene-KI387_041058,gene-KI387_032476,gene-KI387_021696,gene-KI387_028992,gene-KI387_021379
GO:0034637	cellular carbohydrate biosynthetic process	biological_process	0.087702	1	21	2561	138	24160	gene-KI387_013573,gene-KI387_006250,gene-KI387_042616,gene-KI387_034379,gene-KI387_024485,gene-KI387_034378,gene-KI387_006097,gene-KI387_014584,gene-KI387_015030,gene-KI387_026906,gene-KI387_021402,gene-KI387_000177,gene-KI387_034380,gene-KI387_000179,gene-KI387_014585,Novel03376,gene-KI387_042612,gene-KI387_024922,gene-KI387_034276,gene-KI387_008462,gene-KI387_024921
GO:0070838	divalent metal ion transport	biological_process	0.087998	1	7	2561	36	24160	gene-KI387_018627,gene-KI387_000588,Novel03809,gene-KI387_009714,Novel03614,gene-KI387_007137,gene-KI387_001584
GO:0043022	ribosome binding	molecular_function	0.088269	1	7	2561	40	24160	Novel01054,gene-KI387_020351,gene-KI387_037409,gene-KI387_021451,gene-KI387_020451,Novel00649,gene-KI387_020453
GO:0007618	mating	biological_process	0.088354	1	3	2561	9	24160	gene-KI387_031222,Novel02718,Novel05925
GO:0000003	reproduction	biological_process	0.088793	1	41	2561	316	24160	Novel01765,gene-KI387_022362,Novel02621,gene-KI387_002849,gene-KI387_016967,gene-KI387_002835,gene-KI387_034602,gene-KI387_016369,gene-KI387_031222,gene-KI387_004765,gene-KI387_031230,gene-KI387_018507,gene-KI387_006440,Novel01064,gene-KI387_038865,gene-KI387_022773,gene-KI387_003006,gene-KI387_025538,Novel03073,gene-KI387_008526,Novel00672,Novel02718,gene-KI387_006186,Novel04499,Novel03382,gene-…
GO:0004482	mRNA (guanine-N7-)-methyltransferase activity	molecular_function	0.088902	1	2	2561	5	24160	gene-KI387_013487,gene-KI387_023692
GO:0016879	ligase activity, forming carbon-nitrogen bonds	molecular_function	0.08893	1	15	2561	92	24160	gene-KI387_024769,gene-KI387_014788,gene-KI387_008557,gene-KI387_005263,gene-KI387_012059,gene-KI387_014925,gene-KI387_037286,gene-KI387_035541,gene-KI387_011758,gene-KI387_003140,gene-KI387_015468,gene-KI387_036092,gene-KI387_013763,gene-KI387_031734,gene-KI387_022690
GO:0009636	response to toxic substance	biological_process	0.08894	1	6	2561	30	24160	Novel02607,Novel01113,gene-KI387_034734,Novel03955,Novel00336,gene-KI387_014584
GO:0005149	interleukin-1 receptor binding	molecular_function	0.090189	1	1	2561	1	24160	gene-KI387_032521
GO:0051273	beta-glucan metabolic process	biological_process	0.090404	1	14	2561	83	24160	gene-KI387_034380,gene-KI387_000177,gene-KI387_000179,gene-KI387_021402,gene-KI387_013573,gene-KI387_034378,gene-KI387_034379,gene-KI387_024485,gene-KI387_014585,gene-KI387_014584,gene-KI387_024922,gene-KI387_006097,gene-KI387_024921,gene-KI387_026906
GO:0002064	epithelial cell development	biological_process	0.090641	1	4	2561	17	24160	gene-KI387_016369,gene-KI387_035742,gene-KI387_031230,Novel06191
GO:0043087	regulation of GTPase activity	biological_process	0.091286	1	2	2561	4	24160	gene-KI387_037333,Novel04574
GO:0043547	positive regulation of GTPase activity	biological_process	0.091286	1	2	2561	4	24160	gene-KI387_037333,Novel04574
GO:0000750	pheromone-dependent signal transduction involved in conjugation with cellular fusion	biological_process	0.092539	1	2	2561	4	24160	gene-KI387_037340,gene-KI387_024079
GO:0032005	signal transduction involved in positive regulation of conjugation with cellular fusion	biological_process	0.092539	1	2	2561	4	24160	gene-KI387_024079,gene-KI387_037340
GO:0071944	cell periphery	cellular_component	0.094583	1	56	2561	416	24160	Novel04862,gene-KI387_014673,gene-KI387_024921,Novel01543,gene-KI387_014677,gene-KI387_034241,gene-KI387_031230,Novel04167,gene-KI387_034458,gene-KI387_011228,gene-KI387_037271,gene-KI387_014504,Novel02607,gene-KI387_023267,gene-KI387_026906,gene-KI387_029877,gene-KI387_014712,gene-KI387_016369,gene-KI387_006619,gene-KI387_022863,gene-KI387_024485,gene-KI387_006311,gene-KI387_009785,gene-KI387_03…
GO:0030259	lipid glycosylation	biological_process	0.095693	1	7	2561	31	24160	gene-KI387_018508,gene-KI387_019863,Novel01875,gene-KI387_027528,gene-KI387_014419,gene-KI387_018726,Novel01873
GO:0046165	alcohol biosynthetic process	biological_process	0.095757	1	4	2561	21	24160	gene-KI387_042612,gene-KI387_019509,gene-KI387_042616,gene-KI387_006250
GO:0009791	post-embryonic development	biological_process	0.096011	1	2	2561	5	24160	Novel02622,Novel02621
GO:0004568	chitinase activity	molecular_function	0.096495	1	6	2561	34	24160	gene-KI387_028447,gene-KI387_014525,gene-KI387_014194,gene-KI387_006914,gene-KI387_014528,gene-KI387_014527
GO:0020002	host cell plasma membrane	cellular_component	0.096587	1	1	2561	1	24160	gene-KI387_017791
GO:0044156	host cell junction	cellular_component	0.096587	1	1	2561	1	24160	gene-KI387_017791
GO:0044219	host cell plasmodesma	cellular_component	0.096587	1	1	2561	1	24160	gene-KI387_017791
GO:0042181	ketone biosynthetic process	biological_process	0.097136	1	4	2561	15	24160	gene-KI387_008229,gene-KI387_034213,gene-KI387_009566,gene-KI387_024648
GO:1901661	quinone metabolic process	biological_process	0.097136	1	4	2561	15	24160	gene-KI387_008229,gene-KI387_034213,gene-KI387_009566,gene-KI387_024648
GO:1901663	quinone biosynthetic process	biological_process	0.097136	1	4	2561	15	24160	gene-KI387_008229,gene-KI387_034213,gene-KI387_009566,gene-KI387_024648
GO:0015936	coenzyme A metabolic process	biological_process	0.097157	1	4	2561	18	24160	gene-KI387_038959,gene-KI387_028236,gene-KI387_013958,gene-KI387_030597
GO:0019752	carboxylic acid metabolic process	biological_process	0.097792	1	84	2561	658	24160	gene-KI387_016009,gene-KI387_004986,Novel04839,gene-KI387_035754,gene-KI387_022306,gene-KI387_037286,gene-KI387_027081,gene-KI387_012851,gene-KI387_020972,gene-KI387_008351,gene-KI387_039315,gene-KI387_016502,gene-KI387_022290,gene-KI387_017268,gene-KI387_017695,gene-KI387_009190,Novel06459,gene-KI387_022362,gene-KI387_014788,gene-KI387_011705,Novel00948,Novel05424,gene-KI387_032801,gene-KI387_02…
GO:0000755	cytogamy	biological_process	0.098965	1	2	2561	5	24160	gene-KI387_006186,gene-KI387_036274
GO:0022413	reproductive process in single-celled organism	biological_process	0.098965	1	2	2561	5	24160	gene-KI387_036274,gene-KI387_006186
GO:0032220	plasma membrane fusion involved in cytogamy	biological_process	0.098965	1	2	2561	5	24160	gene-KI387_006186,gene-KI387_036274
GO:0016857	racemase and epimerase activity, acting on carbohydrates and derivatives	molecular_function	0.099009	1	4	2561	16	24160	Novel01337,gene-KI387_030823,Novel01219,gene-KI387_000339
GO:0016409	palmitoyltransferase activity	molecular_function	0.099108	1	6	2561	31	24160	gene-KI387_000022,gene-KI387_005377,gene-KI387_028521,gene-KI387_013343,gene-KI387_026659,gene-KI387_010752
GO:0006568	tryptophan metabolic process	biological_process	0.099214	1	2	2561	6	24160	gene-KI387_012304,gene-KI387_012305
GO:0006586	indolalkylamine metabolic process	biological_process	0.099214	1	2	2561	6	24160	gene-KI387_012305,gene-KI387_012304
GO:0042430	indole-containing compound metabolic process	biological_process	0.099214	1	2	2561	6	24160	gene-KI387_012304,gene-KI387_012305
GO:0015939	pantothenate metabolic process	biological_process	0.099431	1	3	2561	10	24160	gene-KI387_014788,gene-KI387_036923,gene-KI387_027081
GO:0015940	pantothenate biosynthetic process	biological_process	0.099431	1	3	2561	10	24160	gene-KI387_027081,gene-KI387_036923,gene-KI387_014788
GO:0006665	sphingolipid metabolic process	biological_process	0.099469	1	3	2561	12	24160	gene-KI387_026321,gene-KI387_026320,gene-KI387_020865
GO:0002115	store-operated calcium entry	biological_process	0.099674	1	2	2561	5	24160	gene-KI387_009714,Novel03614
GO:0010959	regulation of metal ion transport	biological_process	0.099674	1	2	2561	5	24160	Novel03614,gene-KI387_009714
GO:0051924	regulation of calcium ion transport	biological_process	0.099674	1	2	2561	5	24160	Novel03614,gene-KI387_009714
GO:2001256	regulation of store-operated calcium entry	biological_process	0.099674	1	2	2561	5	24160	Novel03614,gene-KI387_009714
GO:0043021	ribonucleoprotein complex binding	molecular_function	0.099845	1	8	2561	49	24160	gene-KI387_020351,Novel01054,gene-KI387_020453,gene-KI387_028330,Novel00649,gene-KI387_020451,gene-KI387_021451,gene-KI387_037409
GO:0009264	deoxyribonucleotide catabolic process	biological_process	0.10012	1	1	2561	2	24160	gene-KI387_002048
GO:0005337	nucleoside transmembrane transporter activity	molecular_function	0.10014	1	3	2561	11	24160	gene-KI387_001098,gene-KI387_011538,gene-KI387_001099
GO:0015858	nucleoside transport	biological_process	0.10014	1	3	2561	11	24160	gene-KI387_001098,gene-KI387_001099,gene-KI387_011538
GO:0008083	growth factor activity	molecular_function	0.1002	1	8	2561	49	24160	Novel05736,gene-KI387_019070,Novel05734,Novel05735,gene-KI387_029041,Novel05453,gene-KI387_029038,gene-KI387_013958
GO:0006188	IMP biosynthetic process	biological_process	0.1012	1	3	2561	10	24160	gene-KI387_005181,gene-KI387_004986,gene-KI387_035919
GO:0046040	IMP metabolic process	biological_process	0.1012	1	3	2561	10	24160	gene-KI387_035919,gene-KI387_004986,gene-KI387_005181
GO:0009095	aromatic amino acid family biosynthetic process, prephenate pathway	biological_process	0.10178	1	3	2561	9	24160	Novel04070,gene-KI387_042576,gene-KI387_007772
GO:0030855	epithelial cell differentiation	biological_process	0.10307	1	4	2561	18	24160	gene-KI387_016369,gene-KI387_035742,gene-KI387_031230,Novel06191
GO:0060429	epithelium development	biological_process	0.10307	1	4	2561	18	24160	gene-KI387_016369,gene-KI387_035742,gene-KI387_031230,Novel06191
GO:0000062	fatty-acyl-CoA binding	molecular_function	0.10472	1	2	2561	6	24160	gene-KI387_004621,gene-KI387_007738
GO:0120227	acyl-CoA binding	molecular_function	0.10472	1	2	2561	6	24160	gene-KI387_004621,gene-KI387_007738
GO:1901567	fatty acid derivative binding	molecular_function	0.10472	1	2	2561	6	24160	gene-KI387_004621,gene-KI387_007738
GO:0006541	glutamine metabolic process	biological_process	0.10759	1	3	2561	10	24160	gene-KI387_037286,gene-KI387_004986,gene-KI387_015468
GO:0030126	COPI vesicle coat	cellular_component	0.10762	1	3	2561	10	24160	gene-KI387_012216,gene-KI387_029292,gene-KI387_012288
GO:0030137	COPI-coated vesicle	cellular_component	0.10762	1	3	2561	10	24160	gene-KI387_029292,gene-KI387_012216,gene-KI387_012288
GO:0030663	COPI-coated vesicle membrane	cellular_component	0.10762	1	3	2561	10	24160	gene-KI387_012288,gene-KI387_029292,gene-KI387_012216
GO:0009916	alternative oxidase activity	molecular_function	0.108	1	2	2561	5	24160	gene-KI387_009566,gene-KI387_008229
GO:0016811	hydrolase activity, acting on carbon-nitrogen (but not peptide) bonds, in linear amides	molecular_function	0.10829	1	7	2561	39	24160	gene-KI387_004986,gene-KI387_022362,gene-KI387_012304,gene-KI387_026321,gene-KI387_026320,gene-KI387_012305,gene-KI387_012882
GO:0043436	oxoacid metabolic process	biological_process	0.10878	1	84	2561	664	24160	Novel02836,gene-KI387_012250,Novel00755,gene-KI387_036923,Novel03955,gene-KI387_011849,gene-KI387_007867,Novel00496,gene-KI387_017946,gene-KI387_014285,gene-KI387_032476,gene-KI387_013662,gene-KI387_019408,gene-KI387_009186,gene-KI387_011758,gene-KI387_015468,gene-KI387_026868,Novel06400,gene-KI387_031726,gene-KI387_022988,gene-KI387_016407,Novel04070,gene-KI387_025888,gene-KI387_037012,gene-KI38…
GO:0003755	peptidyl-prolyl cis-trans isomerase activity	molecular_function	0.10926	1	9	2561	55	24160	gene-KI387_019555,gene-KI387_005730,gene-KI387_020175,gene-KI387_038505,gene-KI387_028961,Novel07396,gene-KI387_037297,Novel04355,gene-KI387_029199
GO:0016859	cis-trans isomerase activity	molecular_function	0.10926	1	9	2561	55	24160	gene-KI387_005730,gene-KI387_038505,gene-KI387_020175,gene-KI387_028961,gene-KI387_019555,gene-KI387_029199,Novel07396,Novel04355,gene-KI387_037297
GO:0004371	glycerone kinase activity	molecular_function	0.11071	1	2	2561	5	24160	gene-KI387_001780,gene-KI387_015349
GO:0004788	thiamine diphosphokinase activity	molecular_function	0.111	1	2	2561	6	24160	gene-KI387_014162,gene-KI387_002853
GO:0044764	multi-organism cellular process	biological_process	0.11112	1	11	2561	67	24160	gene-KI387_037340,gene-KI387_000885,gene-KI387_023091,gene-KI387_024079,gene-KI387_006186,gene-KI387_001899,gene-KI387_035402,gene-KI387_036274,gene-KI387_038033,gene-KI387_037588,gene-KI387_035971
GO:0004564	beta-fructofuranosidase activity	molecular_function	0.11151	1	2	2561	5	24160	gene-KI387_028696,gene-KI387_022407
GO:0004575	sucrose alpha-glucosidase activity	molecular_function	0.11151	1	2	2561	5	24160	gene-KI387_022407,gene-KI387_028696
GO:0090599	alpha-glucosidase activity	molecular_function	0.11151	1	2	2561	5	24160	gene-KI387_022407,gene-KI387_028696
GO:0007610	behavior	biological_process	0.11258	1	4	2561	17	24160	gene-KI387_034734,Novel05925,gene-KI387_031222,Novel02718
GO:0004637	phosphoribosylamine-glycine ligase activity	molecular_function	0.11308	1	2	2561	5	24160	gene-KI387_035541,gene-KI387_005263
GO:0006144	purine nucleobase metabolic process	biological_process	0.11308	1	2	2561	5	24160	gene-KI387_035541,gene-KI387_005263
GO:0009113	purine nucleobase biosynthetic process	biological_process	0.11308	1	2	2561	5	24160	gene-KI387_035541,gene-KI387_005263
GO:0016836	hydro-lyase activity	molecular_function	0.1131	1	10	2561	60	24160	gene-KI387_036227,gene-KI387_001410,gene-KI387_024757,gene-KI387_038848,gene-KI387_042576,Novel04070,gene-KI387_007772,gene-KI387_005815,gene-KI387_014640,Novel05750
GO:0004315	3-oxoacyl-[acyl-carrier-protein] synthase activity	molecular_function	0.1132	1	6	2561	28	24160	gene-KI387_026868,Novel04839,gene-KI387_020972,gene-KI387_039339,Novel05424,Novel06459
GO:0006082	organic acid metabolic process	biological_process	0.11388	1	84	2561	666	24160	gene-KI387_022767,Novel07017,gene-KI387_037648,gene-KI387_035983,gene-KI387_007868,gene-KI387_012304,Novel05750,gene-KI387_034864,gene-KI387_036183,gene-KI387_014383,gene-KI387_034869,Novel05342,gene-KI387_031012,gene-KI387_036098,gene-KI387_009489,gene-KI387_030917,gene-KI387_039339,gene-KI387_034990,gene-KI387_025888,gene-KI387_037012,Novel04070,gene-KI387_016407,gene-KI387_022988,gene-KI387_03…
GO:0000313	organellar ribosome	cellular_component	0.11463	1	3	2561	12	24160	Novel03051,gene-KI387_030933,gene-KI387_032632
GO:0005761	mitochondrial ribosome	cellular_component	0.11463	1	3	2561	12	24160	Novel03051,gene-KI387_032632,gene-KI387_030933
GO:0003953	NAD+ nucleosidase activity	molecular_function	0.11464	1	1	2561	1	24160	gene-KI387_023250
GO:0005338	nucleotide-sugar transmembrane transporter activity	molecular_function	0.1147	1	2	2561	5	24160	Novel03154,gene-KI387_013507
GO:0015165	pyrimidine nucleotide-sugar transmembrane transporter activity	molecular_function	0.1147	1	2	2561	5	24160	gene-KI387_013507,Novel03154
GO:0015780	nucleotide-sugar transmembrane transport	biological_process	0.1147	1	2	2561	5	24160	Novel03154,gene-KI387_013507
GO:0090481	pyrimidine nucleotide-sugar transmembrane transport	biological_process	0.1147	1	2	2561	5	24160	gene-KI387_013507,Novel03154
GO:0031297	replication fork processing	biological_process	0.11556	1	1	2561	1	24160	gene-KI387_027752
GO:0010333	terpene synthase activity	molecular_function	0.11589	1	13	2561	89	24160	gene-KI387_028802,gene-KI387_010602,gene-KI387_028801,gene-KI387_028997,gene-KI387_019626,gene-KI387_028992,gene-KI387_021379,Novel04036,gene-KI387_019627,gene-KI387_028988,gene-KI387_010745,gene-KI387_041058,gene-KI387_021696
GO:0015291	secondary active transmembrane transporter activity	molecular_function	0.11675	1	19	2561	122	24160	gene-KI387_030438,gene-KI387_027439,gene-KI387_009487,gene-KI387_037885,gene-KI387_009488,gene-KI387_004972,gene-KI387_004980,gene-KI387_006747,Novel02634,gene-KI387_043856,gene-KI387_015139,Novel06929,gene-KI387_032173,Novel04376,gene-KI387_010320,gene-KI387_014296,gene-KI387_018341,gene-KI387_020397,Novel02633
GO:0009627	systemic acquired resistance	biological_process	0.11744	1	3	2561	14	24160	Novel06722,gene-KI387_035672,gene-KI387_035673
GO:0009814	defense response, incompatible interaction	biological_process	0.11744	1	3	2561	14	24160	Novel06722,gene-KI387_035672,gene-KI387_035673
GO:0010112	regulation of systemic acquired resistance	biological_process	0.11744	1	3	2561	14	24160	Novel06722,gene-KI387_035672,gene-KI387_035673
GO:0015097	mercury ion transmembrane transporter activity	molecular_function	0.11768	1	4	2561	17	24160	gene-KI387_034734,Novel01113,Novel00336,gene-KI387_014584
GO:0015694	mercury ion transport	biological_process	0.11768	1	4	2561	17	24160	gene-KI387_034734,Novel01113,gene-KI387_014584,Novel00336
GO:0046689	response to mercury ion	biological_process	0.11768	1	4	2561	17	24160	Novel01113,gene-KI387_034734,Novel00336,gene-KI387_014584
GO:0050787	detoxification of mercury ion	biological_process	0.11768	1	4	2561	17	24160	Novel01113,gene-KI387_034734,gene-KI387_014584,Novel00336
GO:0017176	phosphatidylinositol N-acetylglucosaminyltransferase activity	molecular_function	0.11772	1	3	2561	11	24160	gene-KI387_012178,gene-KI387_000104,gene-KI387_034241
GO:0140096	catalytic activity, acting on a protein	molecular_function	0.11785	1	339	2561	2777	24160	gene-KI387_018066,gene-KI387_037505,gene-KI387_035680,gene-KI387_009126,gene-KI387_019429,Novel01687,gene-KI387_008526,gene-KI387_017413,gene-KI387_015225,gene-KI387_012980,gene-KI387_028841,gene-KI387_010897,gene-KI387_034371,gene-KI387_024195,gene-KI387_010650,gene-KI387_022348,gene-KI387_030897,gene-KI387_032013,gene-KI387_017446,gene-KI387_024648,gene-KI387_015371,Novel02438,gene-KI387_011036…
GO:0000272	polysaccharide catabolic process	biological_process	0.11878	1	8	2561	45	24160	Novel03474,gene-KI387_019578,gene-KI387_016297,gene-KI387_025601,gene-KI387_035280,Novel04510,gene-KI387_015549,gene-KI387_015139
GO:0008093	cytoskeletal anchor activity	molecular_function	0.11949	1	1	2561	1	24160	gene-KI387_023267
GO:0005537	mannose binding	molecular_function	0.12054	1	1	2561	1	24160	Novel00856
GO:0007041	lysosomal transport	biological_process	0.12054	1	1	2561	1	24160	Novel00856
GO:0060966	regulation of gene silencing by RNA	biological_process	0.12261	1	2	2561	5	24160	gene-KI387_033816,gene-KI387_029292
GO:0060968	regulation of gene silencing	biological_process	0.12261	1	2	2561	5	24160	gene-KI387_033816,gene-KI387_029292
GO:0006023	aminoglycan biosynthetic process	biological_process	0.12265	1	1	2561	1	24160	gene-KI387_023039
GO:0006031	chitin biosynthetic process	biological_process	0.12265	1	1	2561	1	24160	gene-KI387_023039
GO:0046349	amino sugar biosynthetic process	biological_process	0.12265	1	1	2561	1	24160	gene-KI387_023039
GO:1901073	glucosamine-containing compound biosynthetic process	biological_process	0.12265	1	1	2561	1	24160	gene-KI387_023039
GO:0050532	2-phosphosulfolactate phosphatase activity	molecular_function	0.12385	1	1	2561	2	24160	gene-KI387_012135
GO:0034998	oligosaccharyltransferase I complex	cellular_component	0.12535	1	2	2561	6	24160	gene-KI387_030057,Novel05783
GO:0006032	chitin catabolic process	biological_process	0.12645	1	7	2561	42	24160	gene-KI387_014194,gene-KI387_006914,gene-KI387_014528,gene-KI387_014527,gene-KI387_012774,gene-KI387_028447,gene-KI387_014525
GO:0046348	amino sugar catabolic process	biological_process	0.12645	1	7	2561	42	24160	gene-KI387_014525,gene-KI387_028447,gene-KI387_012774,gene-KI387_006914,gene-KI387_014528,gene-KI387_014527,gene-KI387_014194
GO:1901072	glucosamine-containing compound catabolic process	biological_process	0.12645	1	7	2561	42	24160	gene-KI387_014525,gene-KI387_028447,gene-KI387_014527,gene-KI387_014528,gene-KI387_006914,gene-KI387_014194,gene-KI387_012774
GO:0004842	ubiquitin-protein transferase activity	molecular_function	0.12673	1	43	2561	303	24160	gene-KI387_022601,gene-KI387_024959,gene-KI387_024960,Novel01501,gene-KI387_021501,gene-KI387_023125,Novel02401,Novel06334,gene-KI387_003256,Novel03808,gene-KI387_019631,Novel05145,Novel06691,Novel03809,Novel01813,gene-KI387_014859,gene-KI387_018689,gene-KI387_032203,gene-KI387_000369,Novel03484,gene-KI387_016879,gene-KI387_038766,gene-KI387_020614,Novel04609,Novel00217,gene-KI387_019629,Novel072…
GO:0019787	ubiquitin-like protein transferase activity	molecular_function	0.12673	1	43	2561	303	24160	Novel01501,gene-KI387_021501,gene-KI387_022601,gene-KI387_024959,gene-KI387_024960,Novel03808,gene-KI387_003256,gene-KI387_019631,Novel02401,gene-KI387_023125,Novel06334,Novel01813,Novel03809,Novel06691,Novel05145,Novel03484,gene-KI387_000369,gene-KI387_016879,gene-KI387_018689,gene-KI387_032203,gene-KI387_014859,Novel07267,gene-KI387_019629,Novel00217,gene-KI387_009056,Novel04702,Novel05276,gene…
GO:0006558	L-phenylalanine metabolic process	biological_process	0.12725	1	3	2561	11	24160	Novel04070,gene-KI387_042576,gene-KI387_007772
GO:1902221	erythrose 4-phosphate/phosphoenolpyruvate family amino acid metabolic process	biological_process	0.12725	1	3	2561	11	24160	Novel04070,gene-KI387_042576,gene-KI387_007772
GO:0042138	meiotic DNA double-strand break formation	biological_process	0.12732	1	3	2561	13	24160	gene-KI387_002849,gene-KI387_002835,gene-KI387_022362
GO:0016759	cellulose synthase activity	molecular_function	0.12889	1	10	2561	60	24160	gene-KI387_000177,gene-KI387_034380,gene-KI387_000179,gene-KI387_013573,gene-KI387_021402,gene-KI387_034378,gene-KI387_034379,gene-KI387_014585,gene-KI387_014584,gene-KI387_006097
GO:0016760	cellulose synthase (UDP-forming) activity	molecular_function	0.12889	1	10	2561	60	24160	gene-KI387_014584,gene-KI387_006097,gene-KI387_000177,gene-KI387_034380,gene-KI387_000179,gene-KI387_021402,gene-KI387_013573,gene-KI387_034378,gene-KI387_034379,gene-KI387_014585
GO:0030244	cellulose biosynthetic process	biological_process	0.12889	1	10	2561	60	24160	gene-KI387_000177,gene-KI387_034380,gene-KI387_000179,gene-KI387_013573,gene-KI387_021402,gene-KI387_034378,gene-KI387_034379,gene-KI387_014585,gene-KI387_014584,gene-KI387_006097
GO:0009445	putrescine metabolic process	biological_process	0.12916	1	1	2561	1	24160	gene-KI387_009433
GO:0009446	putrescine biosynthetic process	biological_process	0.12916	1	1	2561	1	24160	gene-KI387_009433
GO:0044000	movement in host	biological_process	0.12969	1	4	2561	20	24160	gene-KI387_017791,Novel04217,Novel05701,gene-KI387_006777
GO:0046739	transport of virus in multicellular host	biological_process	0.12969	1	4	2561	20	24160	Novel04217,Novel05701,gene-KI387_017791,gene-KI387_006777
GO:0046740	transport of virus in host, cell to cell	biological_process	0.12969	1	4	2561	20	24160	gene-KI387_006777,gene-KI387_017791,Novel04217,Novel05701
GO:1902586	multi-organism intercellular transport	biological_process	0.12969	1	4	2561	20	24160	Novel05701,Novel04217,gene-KI387_017791,gene-KI387_006777
GO:0070069	cytochrome complex	cellular_component	0.12992	1	5	2561	28	24160	Novel04609,gene-KI387_025395,gene-KI387_007472,gene-KI387_001249,Novel07044
GO:0008612	peptidyl-lysine modification to peptidyl-hypusine	biological_process	0.13054	1	1	2561	1	24160	gene-KI387_037501
GO:0004512	inositol-3-phosphate synthase activity	molecular_function	0.13061	1	3	2561	15	24160	gene-KI387_042612,gene-KI387_006250,gene-KI387_042616
GO:0006021	inositol biosynthetic process	biological_process	0.13061	1	3	2561	15	24160	gene-KI387_042612,gene-KI387_042616,gene-KI387_006250
GO:0005484	SNAP receptor activity	molecular_function	0.13092	1	3	2561	11	24160	gene-KI387_006674,gene-KI387_023267,gene-KI387_022201
GO:0004312	fatty acid synthase activity	molecular_function	0.13106	1	6	2561	29	24160	gene-KI387_020972,Novel06459,Novel05424,gene-KI387_039339,Novel04839,gene-KI387_026868
GO:0072522	purine-containing compound biosynthetic process	biological_process	0.13408	1	22	2561	162	24160	gene-KI387_014772,gene-KI387_038959,gene-KI387_026339,gene-KI387_022690,Novel07069,Novel05887,gene-KI387_009463,gene-KI387_004986,gene-KI387_037409,gene-KI387_035541,gene-KI387_034894,gene-KI387_025064,gene-KI387_028236,gene-KI387_005181,gene-KI387_005263,gene-KI387_013763,gene-KI387_019016,gene-KI387_003207,Novel00407,gene-KI387_035280,gene-KI387_008557,gene-KI387_035919
GO:0032977	membrane insertase activity	molecular_function	0.13459	1	3	2561	12	24160	gene-KI387_040184,gene-KI387_000519,Novel05434
GO:0004620	phospholipase activity	molecular_function	0.13507	1	3	2561	12	24160	gene-KI387_037433,gene-KI387_012084,gene-KI387_028454
GO:0051537	2 iron, 2 sulfur cluster binding	molecular_function	0.13513	1	6	2561	36	24160	gene-KI387_022807,gene-KI387_017324,gene-KI387_039279,gene-KI387_000255,gene-KI387_037434,gene-KI387_004292
GO:0004107	chorismate synthase activity	molecular_function	0.13561	1	1	2561	1	24160	gene-KI387_032476
GO:0003937	IMP cyclohydrolase activity	molecular_function	0.13606	1	1	2561	1	24160	gene-KI387_003207
GO:0004643	phosphoribosylaminoimidazolecarboxamide formyltransferase activity	molecular_function	0.13606	1	1	2561	1	24160	gene-KI387_003207
GO:0042910	xenobiotic transmembrane transporter activity	molecular_function	0.1365	1	13	2561	82	24160	gene-KI387_004980,gene-KI387_004972,Novel03955,Novel06929,gene-KI387_027439,gene-KI387_043856,Novel02634,Novel02633,gene-KI387_020397,gene-KI387_014296,gene-KI387_010320,Novel04376,Novel02607
GO:0030908	protein splicing	biological_process	0.13656	1	1	2561	1	24160	gene-KI387_019296
GO:0002128	tRNA nucleoside ribose methylation	biological_process	0.13656	1	1	2561	1	24160	Novel07116
GO:0002683	negative regulation of immune system process	biological_process	0.13656	1	1	2561	1	24160	gene-KI387_018046
GO:0002695	negative regulation of leukocyte activation	biological_process	0.13656	1	1	2561	1	24160	gene-KI387_018046
GO:0004399	histidinol dehydrogenase activity	molecular_function	0.13656	1	1	2561	1	24160	gene-KI387_019408
GO:0004838	L-tyrosine:2-oxoglutarate aminotransferase activity	molecular_function	0.13656	1	1	2561	1	24160	gene-KI387_016502
GO:0005540	hyaluronic acid binding	molecular_function	0.13656	1	1	2561	1	24160	Novel01505
GO:0007159	leukocyte cell-cell adhesion	biological_process	0.13656	1	1	2561	1	24160	gene-KI387_018046
GO:0007162	negative regulation of cell adhesion	biological_process	0.13656	1	1	2561	1	24160	gene-KI387_018046
GO:0009881	photoreceptor activity	molecular_function	0.13656	1	1	2561	1	24160	Novel02948
GO:0009882	blue light photoreceptor activity	molecular_function	0.13656	1	1	2561	1	24160	Novel02948
GO:0019670	anaerobic glutamate catabolic process	biological_process	0.13656	1	1	2561	1	24160	gene-KI387_016407
GO:0022407	regulation of cell-cell adhesion	biological_process	0.13656	1	1	2561	1	24160	gene-KI387_018046
GO:0022408	negative regulation of cell-cell adhesion	biological_process	0.13656	1	1	2561	1	24160	gene-KI387_018046
GO:0050097	methylaspartate mutase activity	molecular_function	0.13656	1	1	2561	1	24160	gene-KI387_016407
GO:0050290	sphingomyelin phosphodiesterase D activity	molecular_function	0.13656	1	1	2561	1	24160	gene-KI387_012084
GO:0050750	low-density lipoprotein particle receptor binding	molecular_function	0.13656	1	1	2561	1	24160	Novel06915
GO:0050863	regulation of T cell activation	biological_process	0.13656	1	1	2561	1	24160	gene-KI387_018046
GO:0050866	negative regulation of cell activation	biological_process	0.13656	1	1	2561	1	24160	gene-KI387_018046
GO:0050868	negative regulation of T cell activation	biological_process	0.13656	1	1	2561	1	24160	gene-KI387_018046
GO:0051250	negative regulation of lymphocyte activation	biological_process	0.13656	1	1	2561	1	24160	gene-KI387_018046
GO:0070325	lipoprotein particle receptor binding	molecular_function	0.13656	1	1	2561	1	24160	Novel06915
GO:0070547	L-tyrosine aminotransferase activity	molecular_function	0.13656	1	1	2561	1	24160	gene-KI387_016502
GO:1903037	regulation of leukocyte cell-cell adhesion	biological_process	0.13656	1	1	2561	1	24160	gene-KI387_018046
GO:1903038	negative regulation of leukocyte cell-cell adhesion	biological_process	0.13656	1	1	2561	1	24160	gene-KI387_018046
GO:0009653	anatomical structure morphogenesis	biological_process	0.13686	1	9	2561	59	24160	gene-KI387_016369,gene-KI387_016967,Novel00095,gene-KI387_028341,gene-KI387_025347,gene-KI387_035742,gene-KI387_003367,gene-KI387_031230,gene-KI387_033201
GO:0016157	sucrose synthase activity	molecular_function	0.13713	1	3	2561	10	24160	gene-KI387_031081,gene-KI387_019070,gene-KI387_025580
GO:0051015	actin filament binding	molecular_function	0.13739	1	3	2561	12	24160	gene-KI387_017185,gene-KI387_017189,Novel04168
GO:0016853	isomerase activity	molecular_function	0.13742	1	33	2561	255	24160	gene-KI387_029199,gene-KI387_038989,gene-KI387_012266,gene-KI387_037297,gene-KI387_042612,gene-KI387_027081,gene-KI387_038980,gene-KI387_000339,gene-KI387_038990,gene-KI387_020175,Novel01219,gene-KI387_038505,gene-KI387_002582,gene-KI387_021543,gene-KI387_026298,gene-KI387_005106,gene-KI387_029877,Novel04355,gene-KI387_005730,gene-KI387_038981,gene-KI387_016407,gene-KI387_032801,gene-KI387_006250…
GO:0015297	antiporter activity	molecular_function	0.13799	1	16	2561	101	24160	gene-KI387_027439,gene-KI387_030438,gene-KI387_009487,gene-KI387_009488,gene-KI387_004972,gene-KI387_004980,gene-KI387_006747,Novel02634,gene-KI387_015139,gene-KI387_043856,Novel06929,gene-KI387_014296,Novel04376,gene-KI387_010320,Novel02633,gene-KI387_020397
GO:0044036	cell wall macromolecule metabolic process	biological_process	0.1381	1	7	2561	44	24160	gene-KI387_028447,gene-KI387_014525,Novel05537,gene-KI387_014194,gene-KI387_014528,gene-KI387_014527,gene-KI387_006914
GO:0015926	glucosidase activity	molecular_function	0.13908	1	2	2561	6	24160	gene-KI387_022407,gene-KI387_028696
GO:0000749	response to pheromone triggering conjugation with cellular fusion	biological_process	0.13979	1	2	2561	5	24160	gene-KI387_024079,gene-KI387_037340
GO:0031136	positive regulation of conjugation	biological_process	0.13979	1	2	2561	5	24160	gene-KI387_037340,gene-KI387_024079
GO:0031137	regulation of conjugation with cellular fusion	biological_process	0.13979	1	2	2561	5	24160	gene-KI387_024079,gene-KI387_037340
GO:0031139	positive regulation of conjugation with cellular fusion	biological_process	0.13979	1	2	2561	5	24160	gene-KI387_024079,gene-KI387_037340
GO:0043902	positive regulation of multi-organism process	biological_process	0.13979	1	2	2561	5	24160	gene-KI387_037340,gene-KI387_024079
GO:0071444	cellular response to pheromone	biological_process	0.13979	1	2	2561	5	24160	gene-KI387_037340,gene-KI387_024079
GO:2000241	regulation of reproductive process	biological_process	0.13979	1	2	2561	5	24160	gene-KI387_024079,gene-KI387_037340
GO:2000243	positive regulation of reproductive process	biological_process	0.13979	1	2	2561	5	24160	gene-KI387_037340,gene-KI387_024079
GO:0004133	glycogen debranching enzyme activity	molecular_function	0.13985	1	2	2561	7	24160	gene-KI387_031340,gene-KI387_031342
GO:0004134	4-alpha-glucanotransferase activity	molecular_function	0.13985	1	2	2561	7	24160	gene-KI387_031342,gene-KI387_031340
GO:0008373	sialyltransferase activity	molecular_function	0.14004	1	2	2561	5	24160	Novel06334,gene-KI387_035919
GO:0006595	polyamine metabolic process	biological_process	0.14027	1	3	2561	12	24160	gene-KI387_009433,gene-KI387_035760,gene-KI387_029489
GO:0006596	polyamine biosynthetic process	biological_process	0.14027	1	3	2561	12	24160	gene-KI387_029489,gene-KI387_009433,gene-KI387_035760
GO:0045158	electron transporter, transferring electrons within cytochrome b6/f complex of photosystem II activity	molecular_function	0.14055	1	2	2561	5	24160	gene-KI387_001249,Novel04609
GO:0030488	tRNA methylation	biological_process	0.14226	1	3	2561	12	24160	gene-KI387_027813,Novel07116,gene-KI387_011450
GO:0000275	mitochondrial proton-transporting ATP synthase complex, catalytic sector F(1)	cellular_component	0.14301	1	4	2561	17	24160	gene-KI387_014772,gene-KI387_034894,gene-KI387_025064,gene-KI387_035280
GO:0042451	purine nucleoside biosynthetic process	biological_process	0.14335	1	2	2561	6	24160	gene-KI387_008557,gene-KI387_022690
GO:0046129	purine ribonucleoside biosynthetic process	biological_process	0.14335	1	2	2561	6	24160	gene-KI387_022690,gene-KI387_008557
GO:0006276	plasmid maintenance	biological_process	0.14808	1	2	2561	6	24160	gene-KI387_037588,Novel02032
GO:0045924	regulation of female receptivity	biological_process	0.14834	1	2	2561	6	24160	gene-KI387_031222,Novel05925
GO:0046008	regulation of female receptivity, post-mating	biological_process	0.14834	1	2	2561	6	24160	gene-KI387_031222,Novel05925
GO:0060180	female mating behavior	biological_process	0.14834	1	2	2561	6	24160	gene-KI387_031222,Novel05925
GO:0006783	heme biosynthetic process	biological_process	0.15051	1	2	2561	6	24160	gene-KI387_027652,gene-KI387_034742
GO:0002065	columnar/cuboidal epithelial cell differentiation	biological_process	0.15156	1	3	2561	14	24160	gene-KI387_031230,gene-KI387_035742,gene-KI387_016369
GO:0002066	columnar/cuboidal epithelial cell development	biological_process	0.15156	1	3	2561	14	24160	gene-KI387_031230,gene-KI387_035742,gene-KI387_016369
GO:0005213	structural constituent of egg chorion	molecular_function	0.15156	1	3	2561	14	24160	gene-KI387_031230,gene-KI387_016369,gene-KI387_035742
GO:0007292	female gamete generation	biological_process	0.15156	1	3	2561	14	24160	gene-KI387_031230,gene-KI387_035742,gene-KI387_016369
GO:0007304	chorion-containing eggshell formation	biological_process	0.15156	1	3	2561	14	24160	gene-KI387_031230,gene-KI387_035742,gene-KI387_016369
GO:0030703	eggshell formation	biological_process	0.15156	1	3	2561	14	24160	gene-KI387_031230,gene-KI387_016369,gene-KI387_035742
GO:0030707	ovarian follicle cell development	biological_process	0.15156	1	3	2561	14	24160	gene-KI387_031230,gene-KI387_016369,gene-KI387_035742
GO:0048477	oogenesis	biological_process	0.15156	1	3	2561	14	24160	gene-KI387_031230,gene-KI387_035742,gene-KI387_016369
GO:0000795	synaptonemal complex	cellular_component	0.15163	1	2	2561	7	24160	gene-KI387_002709,gene-KI387_003006
GO:0099086	synaptonemal structure	cellular_component	0.15163	1	2	2561	7	24160	gene-KI387_003006,gene-KI387_002709
GO:0017080	sodium channel regulator activity	molecular_function	0.15178	1	6	2561	31	24160	gene-KI387_038090,gene-KI387_024079,Novel01235,gene-KI387_022917,gene-KI387_007886,gene-KI387_030823
GO:0019871	sodium channel inhibitor activity	molecular_function	0.15178	1	6	2561	31	24160	gene-KI387_024079,Novel01235,gene-KI387_038090,gene-KI387_022917,gene-KI387_007886,gene-KI387_030823
GO:0051743	red chlorophyll catabolite reductase activity	molecular_function	0.15199	1	3	2561	11	24160	gene-KI387_024910,Novel05168,gene-KI387_035971
GO:0000096	sulfur amino acid metabolic process	biological_process	0.15205	1	8	2561	43	24160	gene-KI387_032808,gene-KI387_037012,Novel03955,gene-KI387_012851,Novel06400,Novel07017,gene-KI387_031012,gene-KI387_017695
GO:0006813	potassium ion transport	biological_process	0.15286	1	21	2561	144	24160	gene-KI387_026259,gene-KI387_005377,gene-KI387_009489,gene-KI387_014656,gene-KI387_027147,Novel06565,Novel05957,gene-KI387_017651,gene-KI387_019136,gene-KI387_009504,gene-KI387_001721,gene-KI387_034017,gene-KI387_014653,gene-KI387_009658,Novel02854,gene-KI387_014600,gene-KI387_034063,gene-KI387_011705,gene-KI387_006314,gene-KI387_014654,gene-KI387_029882
GO:0016778	diphosphotransferase activity	molecular_function	0.15463	1	3	2561	13	24160	gene-KI387_002853,gene-KI387_014162,gene-KI387_024606
GO:0030243	cellulose metabolic process	biological_process	0.1558	1	10	2561	62	24160	gene-KI387_021402,gene-KI387_013573,gene-KI387_000179,gene-KI387_000177,gene-KI387_034380,gene-KI387_034379,gene-KI387_014585,gene-KI387_034378,gene-KI387_006097,gene-KI387_014584
GO:0016813	hydrolase activity, acting on carbon-nitrogen (but not peptide) bonds, in linear amidines	molecular_function	0.15583	1	2	2561	6	24160	gene-KI387_009433,Novel04874
GO:0032865	ERMES complex	cellular_component	0.15584	1	2	2561	6	24160	Novel05424,gene-KI387_025599
GO:0044233	mitochondria-associated endoplasmic reticulum membrane	cellular_component	0.15584	1	2	2561	6	24160	Novel05424,gene-KI387_025599
GO:0008097	5S rRNA binding	molecular_function	0.15623	1	2	2561	8	24160	gene-KI387_025872,gene-KI387_035314
GO:0003674	molecular_function	molecular_function	0.15767	1	2232	2561	20455	24160	Novel03154,gene-KI387_014194,gene-KI387_026264,gene-KI387_009658,Novel01075,gene-KI387_018066,gene-KI387_031072,Novel07406,gene-KI387_018299,gene-KI387_026933,gene-KI387_018125,gene-KI387_008526,Novel02490,gene-KI387_037686,Novel02311,gene-KI387_006887,Novel00648,gene-KI387_024703,gene-KI387_014871,Novel01784,gene-KI387_015824,gene-KI387_013748,Novel03474,gene-KI387_002346,Novel05031,gene-KI387_0…
7_016715,gene-KI387_020705,gene-KI387_018324,gene-KI387_014966,gene-KI387_012080,gene-KI387_006311,gene-KI387_035280,gene-KI387_030330,gene-KI387_034894,Novel05734,gene-KI387_006914,gene-KI387_039694,gene-KI387_010362,gene-KI387_007361,gene-KI387_025589,gene-KI387_024168,Novel00755,gene-KI387_028801,gene-KI387_003208,gene-KI387_037678,Novel02237,gene-KI387_028447,Novel02112,gene-KI387_011758,gene…
GO:0004066	asparagine synthase (glutamine-hydrolyzing) activity	molecular_function	0.15789	1	2	2561	6	24160	gene-KI387_012059,gene-KI387_011758
GO:0042600	egg chorion	cellular_component	0.15906	1	4	2561	20	24160	gene-KI387_031230,Novel04039,gene-KI387_035742,gene-KI387_016369
GO:0009522	photosystem I	cellular_component	0.15924	1	5	2561	26	24160	gene-KI387_021633,gene-KI387_029490,gene-KI387_005309,gene-KI387_029489,gene-KI387_023155
GO:0008236	serine-type peptidase activity	molecular_function	0.16033	1	46	2561	345	24160	gene-KI387_001390,gene-KI387_011228,gene-KI387_024037,Novel04862,gene-KI387_008009,gene-KI387_010637,Novel05887,gene-KI387_016060,gene-KI387_019636,gene-KI387_035685,gene-KI387_035477,gene-KI387_001181,Novel00545,gene-KI387_033731,gene-KI387_013329,gene-KI387_005794,Novel03099,gene-KI387_022718,gene-KI387_008354,gene-KI387_002936,gene-KI387_020204,gene-KI387_020139,gene-KI387_006648,gene-KI387_03…
GO:0016825	hydrolase activity, acting on acid phosphorus-nitrogen bonds	molecular_function	0.16033	1	46	2561	345	24160	gene-KI387_013136,gene-KI387_033555,gene-KI387_040630,gene-KI387_026883,gene-KI387_015336,gene-KI387_020139,gene-KI387_006648,gene-KI387_023379,gene-KI387_034808,gene-KI387_001704,Novel02765,gene-KI387_017446,gene-KI387_011036,gene-KI387_039023,gene-KI387_035680,gene-KI387_009126,gene-KI387_009544,gene-KI387_022722,gene-KI387_019733,gene-KI387_022720,gene-KI387_035682,gene-KI387_010612,gene-KI387…
GO:0017171	serine hydrolase activity	molecular_function	0.16033	1	46	2561	345	24160	gene-KI387_005794,Novel03099,gene-KI387_022718,gene-KI387_008354,gene-KI387_002936,gene-KI387_020204,gene-KI387_035477,gene-KI387_035685,gene-KI387_001181,gene-KI387_033731,Novel00545,gene-KI387_013329,Novel04862,gene-KI387_010637,gene-KI387_008009,Novel05887,gene-KI387_016060,gene-KI387_019636,gene-KI387_001390,gene-KI387_011228,gene-KI387_024037,gene-KI387_022814,gene-KI387_011229,gene-KI387_01…
GO:0006810	transport	biological_process	0.16083	1	342	2561	2931	24160	Novel05049,gene-KI387_000912,gene-KI387_025888,Novel00407,gene-KI387_016466,gene-KI387_000400,gene-KI387_027439,gene-KI387_025520,gene-KI387_015002,gene-KI387_029338,gene-KI387_031259,gene-KI387_026259,gene-KI387_040032,gene-KI387_020448,gene-KI387_037271,gene-KI387_012659,gene-KI387_034458,Novel06680,gene-KI387_018241,gene-KI387_028126,gene-KI387_009504,gene-KI387_034485,gene-KI387_010320,gene-K…
GO:0016830	carbon-carbon lyase activity	molecular_function	0.16096	1	19	2561	137	24160	gene-KI387_035760,gene-KI387_025209,gene-KI387_034213,gene-KI387_022767,gene-KI387_031026,gene-KI387_020139,gene-KI387_038701,gene-KI387_004864,gene-KI387_029489,gene-KI387_006788,gene-KI387_009186,gene-KI387_030823,Novel01219,gene-KI387_013662,gene-KI387_024158,gene-KI387_008351,gene-KI387_015818,gene-KI387_000885,gene-KI387_025073
GO:0046148	pigment biosynthetic process	biological_process	0.1612	1	6	2561	30	24160	gene-KI387_036227,gene-KI387_027652,gene-KI387_035541,gene-KI387_034742,Novel05750,gene-KI387_005263
GO:0030282	bone mineralization	biological_process	0.16167	1	1	2561	2	24160	gene-KI387_024614
GO:0030500	regulation of bone mineralization	biological_process	0.16167	1	1	2561	2	24160	gene-KI387_024614
GO:0031214	biomineral tissue development	biological_process	0.16167	1	1	2561	2	24160	gene-KI387_024614
GO:0046848	hydroxyapatite binding	molecular_function	0.16167	1	1	2561	2	24160	gene-KI387_024614
GO:0070167	regulation of biomineral tissue development	biological_process	0.16167	1	1	2561	2	24160	gene-KI387_024614
GO:0110148	biomineralization	biological_process	0.16167	1	1	2561	2	24160	gene-KI387_024614
GO:0110149	regulation of biomineralization	biological_process	0.16167	1	1	2561	2	24160	gene-KI387_024614
GO:0033865	nucleoside bisphosphate metabolic process	biological_process	0.16482	1	5	2561	27	24160	gene-KI387_030597,gene-KI387_009991,gene-KI387_038959,gene-KI387_028236,gene-KI387_013958
GO:0033875	ribonucleoside bisphosphate metabolic process	biological_process	0.16482	1	5	2561	27	24160	gene-KI387_038959,gene-KI387_009991,gene-KI387_028236,gene-KI387_013958,gene-KI387_030597
GO:0034032	purine nucleoside bisphosphate metabolic process	biological_process	0.16482	1	5	2561	27	24160	gene-KI387_030597,gene-KI387_009991,gene-KI387_038959,gene-KI387_028236,gene-KI387_013958
GO:0035658	Mon1-Ccz1 complex	cellular_component	0.16505	1	1	2561	2	24160	gene-KI387_016020
GO:0004721	phosphoprotein phosphatase activity	molecular_function	0.16506	1	8	2561	47	24160	gene-KI387_038096,gene-KI387_007975,gene-KI387_022266,gene-KI387_019635,gene-KI387_022425,Novel00871,gene-KI387_024195,gene-KI387_022348
GO:0046789	host cell surface receptor binding	molecular_function	0.16549	1	3	2561	15	24160	gene-KI387_001882,gene-KI387_037588,gene-KI387_035402
GO:0008483	transaminase activity	molecular_function	0.16571	1	3	2561	11	24160	gene-KI387_001533,gene-KI387_016502,gene-KI387_024089
GO:0003747	translation release factor activity	molecular_function	0.16634	1	3	2561	13	24160	gene-KI387_028567,gene-KI387_028564,gene-KI387_036196
GO:0008079	translation termination factor activity	molecular_function	0.16634	1	3	2561	13	24160	gene-KI387_028567,gene-KI387_028564,gene-KI387_036196
GO:0016679	oxidoreductase activity, acting on diphenols and related substances as donors	molecular_function	0.1667	1	13	2561	112	24160	gene-KI387_035360,gene-KI387_008229,gene-KI387_037434,gene-KI387_020965,Novel02115,gene-KI387_009566,gene-KI387_035235,Novel06434,gene-KI387_017324,gene-KI387_011971,gene-KI387_022807,gene-KI387_022773,gene-KI387_000339
GO:0042278	purine nucleoside metabolic process	biological_process	0.16768	1	3	2561	12	24160	gene-KI387_008557,gene-KI387_022690,gene-KI387_009991
GO:0046128	purine ribonucleoside metabolic process	biological_process	0.16768	1	3	2561	12	24160	gene-KI387_008557,gene-KI387_022690,gene-KI387_009991
GO:0016051	carbohydrate biosynthetic process	biological_process	0.16923	1	31	2561	231	24160	gene-KI387_024158,gene-KI387_014584,gene-KI387_015030,gene-KI387_006097,Novel03544,gene-KI387_026906,gene-KI387_013573,gene-KI387_010870,Novel01099,Novel03092,gene-KI387_034378,gene-KI387_042616,Novel06818,gene-KI387_034379,gene-KI387_006250,gene-KI387_024485,gene-KI387_024922,gene-KI387_042612,gene-KI387_034276,Novel03376,gene-KI387_036227,gene-KI387_037515,gene-KI387_024921,gene-KI387_008462,ge…
GO:0009059	macromolecule biosynthetic process	biological_process	0.17009	1	381	2561	3356	24160	gene-KI387_027845,Novel04616,gene-KI387_020044,gene-KI387_030934,gene-KI387_024907,Novel00496,gene-KI387_033421,gene-KI387_017047,gene-KI387_000358,gene-KI387_005435,gene-KI387_016284,gene-KI387_034378,gene-KI387_030933,gene-KI387_012576,gene-KI387_002877,gene-KI387_007414,gene-KI387_033235,gene-KI387_027178,gene-KI387_024908,Novel00871,gene-KI387_035593,gene-KI387_029546,gene-KI387_003777,gene-K…
GO:0008138	protein tyrosine/serine/threonine phosphatase activity	molecular_function	0.17061	1	5	2561	25	24160	gene-KI387_038096,gene-KI387_022266,gene-KI387_019635,gene-KI387_022348,gene-KI387_024195
GO:0000120	RNA polymerase I transcription regulator complex	cellular_component	0.17086	1	1	2561	3	24160	Novel02315
GO:0005668	RNA polymerase transcription factor SL1 complex	cellular_component	0.17086	1	1	2561	3	24160	Novel02315
GO:0006633	fatty acid biosynthetic process	biological_process	0.17136	1	11	2561	77	24160	Novel06459,Novel05424,gene-KI387_039339,Novel00672,gene-KI387_019345,Novel04839,gene-KI387_037648,gene-KI387_026868,gene-KI387_012250,Novel00755,gene-KI387_020972
GO:0004784	superoxide dismutase activity	molecular_function	0.17206	1	2	2561	7	24160	gene-KI387_018338,gene-KI387_005794
GO:0016721	oxidoreductase activity, acting on superoxide radicals as acceptor	molecular_function	0.17206	1	2	2561	7	24160	gene-KI387_018338,gene-KI387_005794
GO:0030258	lipid modification	biological_process	0.17242	1	8	2561	44	24160	gene-KI387_039315,gene-KI387_018726,gene-KI387_014419,gene-KI387_027528,Novel01873,gene-KI387_018508,gene-KI387_019863,Novel01875
GO:0042398	cellular modified amino acid biosynthetic process	biological_process	0.17271	1	7	2561	41	24160	gene-KI387_027081,gene-KI387_031734,gene-KI387_014788,gene-KI387_003140,Novel05200,gene-KI387_036923,gene-KI387_026390
GO:0008174	mRNA methyltransferase activity	molecular_function	0.17329	1	2	2561	7	24160	gene-KI387_023692,gene-KI387_013487
GO:0051234	establishment of localization	biological_process	0.17355	1	343	2561	2948	24160	Novel04217,gene-KI387_003726,Novel00856,gene-KI387_020397,gene-KI387_014915,gene-KI387_028043,gene-KI387_005492,Novel00184,Novel01546,gene-KI387_011705,gene-KI387_020496,Novel00251,gene-KI387_028017,gene-KI387_032231,gene-KI387_013653,gene-KI387_008093,gene-KI387_019488,gene-KI387_027901,gene-KI387_034755,gene-KI387_013289,gene-KI387_039007,Novel02869,gene-KI387_000810,Novel06565,gene-KI387_01282…
GO:0140104	molecular carrier activity	molecular_function	0.17397	1	3	2561	14	24160	Novel05434,gene-KI387_000519,gene-KI387_040184
GO:0051345	positive regulation of hydrolase activity	biological_process	0.17398	1	2	2561	7	24160	Novel04574,gene-KI387_037333
GO:0006520	cellular amino acid metabolic process	biological_process	0.17414	1	48	2561	367	24160	gene-KI387_022988,gene-KI387_016407,gene-KI387_012305,gene-KI387_042576,gene-KI387_024281,gene-KI387_032801,Novel04070,gene-KI387_011705,gene-KI387_031726,gene-KI387_032476,gene-KI387_019408,gene-KI387_030923,gene-KI387_009186,gene-KI387_024757,gene-KI387_011758,gene-KI387_015468,gene-KI387_031855,Novel06683,gene-KI387_012059,Novel06400,gene-KI387_012250,gene-KI387_007772,Novel03955,gene-KI387_02…
GO:1990961	xenobiotic detoxification by transmembrane export across the plasma membrane	biological_process	0.17454	1	2	2561	7	24160	Novel03955,Novel02607
GO:0004359	glutaminase activity	molecular_function	0.17472	1	2	2561	6	24160	gene-KI387_004986,gene-KI387_022362
GO:0016646	oxidoreductase activity, acting on the CH-NH group of donors, NAD or NADP as acceptor	molecular_function	0.17489	1	6	2561	34	24160	gene-KI387_009489,gene-KI387_036841,gene-KI387_036183,Novel03955,gene-KI387_021590,gene-KI387_037012
GO:0042775	mitochondrial ATP synthesis coupled electron transport	biological_process	0.17527	1	4	2561	21	24160	Novel04127,gene-KI387_007472,Novel03043,Novel07044
GO:0005136	interleukin-4 receptor binding	molecular_function	0.17607	1	1	2561	2	24160	gene-KI387_013958
GO:0046034	ATP metabolic process	biological_process	0.1762	1	26	2561	204	24160	gene-KI387_035280,gene-KI387_017946,gene-KI387_031072,gene-KI387_022290,gene-KI387_011849,Novel03043,Novel00407,gene-KI387_037409,gene-KI387_025064,gene-KI387_034894,gene-KI387_007472,gene-KI387_011850,gene-KI387_019016,Novel04127,gene-KI387_014383,Novel05342,gene-KI387_035754,gene-KI387_022767,gene-KI387_014772,Novel00948,Novel07044,Novel07069,gene-KI387_009463,gene-KI387_035983,gene-KI387_02633…
GO:0042254	ribosome biogenesis	biological_process	0.17865	1	21	2561	162	24160	gene-KI387_027813,gene-KI387_011450,gene-KI387_010745,gene-KI387_002940,gene-KI387_032110,gene-KI387_035541,gene-KI387_004305,gene-KI387_019145,gene-KI387_026298,gene-KI387_036906,Novel06050,gene-KI387_019063,gene-KI387_008350,gene-KI387_028812,gene-KI387_033528,gene-KI387_005739,gene-KI387_023029,gene-KI387_024709,gene-KI387_005958,Novel03002,gene-KI387_016545
GO:0044272	sulfur compound biosynthetic process	biological_process	0.17901	1	9	2561	57	24160	gene-KI387_031012,Novel06400,gene-KI387_014162,gene-KI387_031734,gene-KI387_003140,gene-KI387_017695,gene-KI387_037240,gene-KI387_032808,gene-KI387_002853
GO:0008081	phosphoric diester hydrolase activity	molecular_function	0.17903	1	7	2561	43	24160	Novel00755,gene-KI387_000885,gene-KI387_035215,gene-KI387_037433,gene-KI387_010492,gene-KI387_015544,gene-KI387_012084
GO:0031854	orexigenic neuropeptide QRFP receptor binding	molecular_function	0.17948	1	1	2561	2	24160	Novel02869
GO:0019438	aromatic compound biosynthetic process	biological_process	0.1803	1	264	2561	2308	24160	gene-KI387_038959,gene-KI387_035687,gene-KI387_042806,gene-KI387_022690,gene-KI387_026339,gene-KI387_014528,gene-KI387_009463,gene-KI387_035419,gene-KI387_005437,gene-KI387_037212,gene-KI387_039280,gene-KI387_000263,Novel06031,gene-KI387_037409,gene-KI387_003389,gene-KI387_003367,gene-KI387_023384,gene-KI387_019459,gene-KI387_027583,gene-KI387_024757,gene-KI387_024960,gene-KI387_007772,Novel03120…
GO:0005544	calcium-dependent phospholipid binding	molecular_function	0.18073	1	3	2561	12	24160	gene-KI387_031266,gene-KI387_022340,gene-KI387_016142
GO:0016994	precorrin-6A reductase activity	molecular_function	0.18347	1	1	2561	2	24160	gene-KI387_030750
GO:0031300	intrinsic component of organelle membrane	cellular_component	0.18389	1	16	2561	118	24160	Novel02621,Novel03614,gene-KI387_009714,Novel03812,gene-KI387_011006,Novel04920,gene-KI387_006902,gene-KI387_034693,gene-KI387_040413,gene-KI387_026909,gene-KI387_037885,gene-KI387_037505,gene-KI387_008390,gene-KI387_010752,gene-KI387_023862,gene-KI387_020139
GO:0031301	integral component of organelle membrane	cellular_component	0.18389	1	16	2561	118	24160	gene-KI387_008390,gene-KI387_010752,gene-KI387_020139,gene-KI387_023862,gene-KI387_011006,Novel03812,gene-KI387_009714,Novel03614,Novel02621,Novel04920,gene-KI387_006902,gene-KI387_026909,gene-KI387_040413,gene-KI387_034693,gene-KI387_037505,gene-KI387_037885
GO:0001503	ossification	biological_process	0.18545	1	3	2561	16	24160	gene-KI387_023996,gene-KI387_024614,gene-KI387_007245
GO:0006164	purine nucleotide biosynthetic process	biological_process	0.18547	1	20	2561	153	24160	gene-KI387_009463,Novel05887,Novel07069,gene-KI387_022690,gene-KI387_026339,gene-KI387_038959,gene-KI387_014772,gene-KI387_004986,gene-KI387_013763,gene-KI387_019016,gene-KI387_028236,gene-KI387_005181,gene-KI387_025064,gene-KI387_034894,gene-KI387_037409,gene-KI387_035919,gene-KI387_008557,gene-KI387_035280,Novel00407,gene-KI387_003207
GO:0009733	response to auxin	biological_process	0.18554	1	5	2561	35	24160	gene-KI387_017240,gene-KI387_016635,gene-KI387_035508,gene-KI387_019459,gene-KI387_004191
GO:0005244	voltage-gated ion channel activity	molecular_function	0.18643	1	6	2561	34	24160	gene-KI387_009627,gene-KI387_013451,gene-KI387_030556,gene-KI387_007805,Novel03809,gene-KI387_027972
GO:0022832	voltage-gated channel activity	molecular_function	0.18643	1	6	2561	34	24160	gene-KI387_027972,gene-KI387_007805,Novel03809,gene-KI387_030556,gene-KI387_013451,gene-KI387_009627
GO:0045261	proton-transporting ATP synthase complex, catalytic core F(1)	cellular_component	0.18726	1	4	2561	20	24160	gene-KI387_034894,gene-KI387_014772,gene-KI387_025064,gene-KI387_035280
GO:0004810	tRNA adenylyltransferase activity	molecular_function	0.18743	1	2	2561	6	24160	gene-KI387_022690,gene-KI387_008557
GO:1990817	RNA adenylyltransferase activity	molecular_function	0.18743	1	2	2561	6	24160	gene-KI387_008557,gene-KI387_022690
GO:0003006	developmental process involved in reproduction	biological_process	0.18781	1	9	2561	63	24160	Novel00295,gene-KI387_004765,gene-KI387_031230,Novel02621,Novel00672,gene-KI387_035742,Novel02622,gene-KI387_016967,gene-KI387_016369
GO:0030118	clathrin coat	cellular_component	0.18813	1	3	2561	14	24160	gene-KI387_040351,Novel05632,gene-KI387_006304
GO:0016307	phosphatidylinositol phosphate kinase activity	molecular_function	0.18845	1	2	2561	6	24160	gene-KI387_010050,gene-KI387_025456
GO:0030089	phycobilisome	cellular_component	0.18886	1	2	2561	7	24160	gene-KI387_028802,gene-KI387_004620
GO:0004673	protein histidine kinase activity	molecular_function	0.18978	1	10	2561	61	24160	gene-KI387_025888,gene-KI387_029628,gene-KI387_005156,gene-KI387_026663,gene-KI387_013595,gene-KI387_035960,gene-KI387_026365,gene-KI387_035882,gene-KI387_016849,Novel00840
GO:0016775	phosphotransferase activity, nitrogenous group as acceptor	molecular_function	0.18978	1	10	2561	61	24160	gene-KI387_035882,gene-KI387_026365,Novel00840,gene-KI387_016849,gene-KI387_026663,gene-KI387_013595,gene-KI387_005156,gene-KI387_025888,gene-KI387_029628,gene-KI387_035960
GO:0008705	methionine synthase activity	molecular_function	0.19069	1	1	2561	2	24160	gene-KI387_032808
GO:0042084	5-methyltetrahydrofolate-dependent methyltransferase activity	molecular_function	0.19069	1	1	2561	2	24160	gene-KI387_032808
GO:1905368	peptidase complex	cellular_component	0.19091	1	13	2561	96	24160	gene-KI387_037885,gene-KI387_030897,gene-KI387_018662,gene-KI387_023862,gene-KI387_040413,gene-KI387_034693,gene-KI387_021849,gene-KI387_015465,gene-KI387_019247,gene-KI387_006902,gene-KI387_027425,Novel02438,gene-KI387_019865
GO:0043900	regulation of multi-organism process	biological_process	0.19155	1	2	2561	6	24160	gene-KI387_024079,gene-KI387_037340
GO:0046999	regulation of conjugation	biological_process	0.19155	1	2	2561	6	24160	gene-KI387_037340,gene-KI387_024079
GO:0022857	transmembrane transporter activity	molecular_function	0.19172	1	176	2561	1451	24160	gene-KI387_018689,gene-KI387_033396,gene-KI387_018341,gene-KI387_031864,gene-KI387_004317,gene-KI387_007981,gene-KI387_033235,gene-KI387_000872,gene-KI387_020139,gene-KI387_019418,Novel04698,gene-KI387_024895,gene-KI387_028598,Novel02634,gene-KI387_012111,gene-KI387_027147,gene-KI387_010745,gene-KI387_001099,Novel03955,gene-KI387_037885,gene-KI387_032445,gene-KI387_030438,gene-KI387_000588,gene-K…
GO:0061687	detoxification of inorganic compound	biological_process	0.19197	1	4	2561	21	24160	gene-KI387_034734,Novel00336,Novel01113,gene-KI387_014584
GO:0007276	gamete generation	biological_process	0.19232	1	7	2561	48	24160	gene-KI387_016369,gene-KI387_035742,Novel00672,Novel00295,gene-KI387_004765,gene-KI387_031230,gene-KI387_016967
GO:0032958	inositol phosphate biosynthetic process	biological_process	0.1929	1	1	2561	2	24160	gene-KI387_019509
GO:0016855	racemase and epimerase activity, acting on amino acids and derivatives	molecular_function	0.19431	1	2	2561	8	24160	gene-KI387_032801,gene-KI387_027081
GO:0036361	racemase activity, acting on amino acids and derivatives	molecular_function	0.19431	1	2	2561	8	24160	gene-KI387_027081,gene-KI387_032801
GO:0004100	chitin synthase activity	molecular_function	0.19532	1	1	2561	2	24160	gene-KI387_023039
GO:0016772	transferase activity, transferring phosphorus-containing groups	molecular_function	0.19689	1	267	2561	2165	24160	gene-KI387_035649,gene-KI387_012918,Novel07026,gene-KI387_025456,Novel01633,gene-KI387_006728,gene-KI387_013881,gene-KI387_025697,gene-KI387_025736,gene-KI387_016733,Novel01428,gene-KI387_010695,gene-KI387_026306,gene-KI387_026365,gene-KI387_000369,gene-KI387_014893,gene-KI387_031483,gene-KI387_035960,gene-KI387_013905,gene-KI387_001614,gene-KI387_021736,gene-KI387_035893,gene-KI387_037751,gene-K…
GO:0000976	transcription regulatory region sequence-specific DNA binding	molecular_function	0.19804	1	3	2561	16	24160	gene-KI387_033785,gene-KI387_032427,gene-KI387_001442
GO:0001067	regulatory region nucleic acid binding	molecular_function	0.19804	1	3	2561	16	24160	gene-KI387_001442,gene-KI387_033785,gene-KI387_032427
GO:0045026	plasma membrane fusion	biological_process	0.19829	1	2	2561	8	24160	gene-KI387_036274,gene-KI387_006186
GO:0005543	phospholipid binding	molecular_function	0.19929	1	9	2561	53	24160	gene-KI387_035557,Novel03071,gene-KI387_022340,gene-KI387_006517,gene-KI387_002440,gene-KI387_016142,gene-KI387_031266,gene-KI387_032188,gene-KI387_011561
GO:0016769	transferase activity, transferring nitrogenous groups	molecular_function	0.20046	1	3	2561	12	24160	gene-KI387_001533,gene-KI387_024089,gene-KI387_016502
GO:0008172	S-methyltransferase activity	molecular_function	0.20058	1	5	2561	30	24160	gene-KI387_031012,Novel06400,gene-KI387_032808,gene-KI387_017695,Novel06401
GO:0046812	host cell surface binding	molecular_function	0.20059	1	3	2561	16	24160	gene-KI387_037588,gene-KI387_001882,gene-KI387_035402
GO:0016503	pheromone receptor activity	molecular_function	0.20245	1	2	2561	9	24160	gene-KI387_015465,gene-KI387_028491
GO:0042908	xenobiotic transport	biological_process	0.20275	1	2	2561	8	24160	Novel02607,Novel03955
GO:0016645	oxidoreductase activity, acting on the CH-NH group of donors	molecular_function	0.20279	1	9	2561	57	24160	gene-KI387_021590,Novel03955,gene-KI387_037012,gene-KI387_024910,gene-KI387_018063,gene-KI387_036183,gene-KI387_039318,gene-KI387_009489,gene-KI387_036841
GO:0010038	response to metal ion	biological_process	0.20357	1	6	2561	37	24160	gene-KI387_014584,gene-KI387_034734,Novel01113,Novel00336,gene-KI387_028330,gene-KI387_013144
GO:0030865	cortical cytoskeleton organization	biological_process	0.20408	1	1	2561	2	24160	gene-KI387_014896
GO:0030866	cortical actin cytoskeleton organization	biological_process	0.20408	1	1	2561	2	24160	gene-KI387_014896
GO:0006528	asparagine metabolic process	biological_process	0.20533	1	2	2561	7	24160	gene-KI387_012059,gene-KI387_011758
GO:0006529	asparagine biosynthetic process	biological_process	0.20533	1	2	2561	7	24160	gene-KI387_011758,gene-KI387_012059
GO:0000977	RNA polymerase II transcription regulatory region sequence-specific DNA binding	molecular_function	0.20556	1	2	2561	8	24160	gene-KI387_001442,gene-KI387_033785
GO:0000314	organellar small ribosomal subunit	cellular_component	0.20641	1	1	2561	3	24160	gene-KI387_030933
GO:0005763	mitochondrial small ribosomal subunit	cellular_component	0.20641	1	1	2561	3	24160	gene-KI387_030933
GO:0015935	small ribosomal subunit	cellular_component	0.20641	1	1	2561	3	24160	gene-KI387_030933
GO:0015918	sterol transport	biological_process	0.2075	1	1	2561	2	24160	gene-KI387_009716
GO:0032365	intracellular lipid transport	biological_process	0.2075	1	1	2561	2	24160	gene-KI387_009716
GO:0032366	intracellular sterol transport	biological_process	0.2075	1	1	2561	2	24160	gene-KI387_009716
GO:0009349	riboflavin synthase complex	cellular_component	0.20763	1	1	2561	2	24160	gene-KI387_014214
GO:0044275	cellular carbohydrate catabolic process	biological_process	0.20765	1	2	2561	7	24160	gene-KI387_011785,gene-KI387_011792
GO:0008417	fucosyltransferase activity	molecular_function	0.20773	1	2	2561	8	24160	gene-KI387_024637,gene-KI387_038611
GO:0005740	mitochondrial envelope	cellular_component	0.20819	1	31	2561	248	24160	gene-KI387_026485,gene-KI387_014772,gene-KI387_010752,gene-KI387_033732,Novel05424,gene-KI387_024718,Novel07069,Novel07044,gene-KI387_002742,gene-KI387_002736,gene-KI387_036235,Novel03495,gene-KI387_018241,gene-KI387_034894,gene-KI387_025064,gene-KI387_007472,gene-KI387_002738,Novel03630,gene-KI387_025599,Novel03171,gene-KI387_019016,gene-KI387_030923,gene-KI387_030547,Novel04667,gene-KI387_03364…
GO:0009832	plant-type cell wall biogenesis	biological_process	0.20821	1	2	2561	7	24160	gene-KI387_029812,gene-KI387_025599
GO:0010215	cellulose microfibril organization	biological_process	0.20821	1	2	2561	7	24160	gene-KI387_029812,gene-KI387_025599
GO:0070726	cell wall assembly	biological_process	0.20821	1	2	2561	7	24160	gene-KI387_025599,gene-KI387_029812
GO:0071668	plant-type cell wall assembly	biological_process	0.20821	1	2	2561	7	24160	gene-KI387_025599,gene-KI387_029812
GO:0140115	export across plasma membrane	biological_process	0.20881	1	4	2561	23	24160	gene-KI387_020139,Novel02607,Novel03955,gene-KI387_004864
GO:0009294	DNA mediated transformation	biological_process	0.20916	1	2	2561	8	24160	gene-KI387_035971,gene-KI387_000885
GO:0008661	1-deoxy-D-xylulose-5-phosphate synthase activity	molecular_function	0.20944	1	3	2561	12	24160	gene-KI387_004306,gene-KI387_034266,gene-KI387_039159
GO:0016744	transferase activity, transferring aldehyde or ketonic groups	molecular_function	0.20944	1	3	2561	12	24160	gene-KI387_034266,gene-KI387_004306,gene-KI387_039159
GO:0006739	NADP metabolic process	biological_process	0.21026	1	3	2561	14	24160	gene-KI387_018123,Novel05342,gene-KI387_036098
GO:0015932	nucleobase-containing compound transmembrane transporter activity	molecular_function	0.21035	1	6	2561	36	24160	gene-KI387_001098,gene-KI387_011538,gene-KI387_001099,gene-KI387_030438,gene-KI387_013507,Novel03154
GO:0009165	nucleotide biosynthetic process	biological_process	0.21083	1	24	2561	189	24160	gene-KI387_005181,gene-KI387_028236,gene-KI387_034894,gene-KI387_025064,gene-KI387_037409,gene-KI387_019016,gene-KI387_013763,gene-KI387_024769,gene-KI387_024606,gene-KI387_035280,gene-KI387_003207,Novel00407,gene-KI387_035919,gene-KI387_018123,gene-KI387_008557,gene-KI387_038959,gene-KI387_014772,gene-KI387_009463,Novel07069,Novel05887,gene-KI387_026339,gene-KI387_022690,gene-KI387_004986,Novel0…
GO:1901293	nucleoside phosphate biosynthetic process	biological_process	0.21083	1	24	2561	189	24160	gene-KI387_019016,gene-KI387_013763,gene-KI387_005181,gene-KI387_028236,gene-KI387_037409,gene-KI387_025064,gene-KI387_034894,gene-KI387_018123,gene-KI387_035919,gene-KI387_008557,gene-KI387_024606,gene-KI387_035280,gene-KI387_024769,Novel00407,gene-KI387_003207,Novel07069,Novel05887,gene-KI387_009463,gene-KI387_026339,gene-KI387_022690,gene-KI387_038959,gene-KI387_014772,Novel05342,gene-KI387_00…
GO:0000148	1,3-beta-D-glucan synthase complex	cellular_component	0.21216	1	4	2561	19	24160	gene-KI387_026906,gene-KI387_024921,gene-KI387_024485,gene-KI387_024922
GO:0003843	1,3-beta-D-glucan synthase activity	molecular_function	0.21216	1	4	2561	19	24160	gene-KI387_024922,gene-KI387_026906,gene-KI387_024485,gene-KI387_024921
GO:0006074	(1->3)-beta-D-glucan metabolic process	biological_process	0.21216	1	4	2561	19	24160	gene-KI387_026906,gene-KI387_024485,gene-KI387_024921,gene-KI387_024922
GO:0006075	(1->3)-beta-D-glucan biosynthetic process	biological_process	0.21216	1	4	2561	19	24160	gene-KI387_024922,gene-KI387_024921,gene-KI387_026906,gene-KI387_024485
GO:0008455	alpha-1,6-mannosylglycoprotein 2-beta-N-acetylglucosaminyltransferase activity	molecular_function	0.21226	1	1	2561	2	24160	Novel03544
GO:0034645	cellular macromolecule biosynthetic process	biological_process	0.21248	1	377	2561	3343	24160	gene-KI387_003777,gene-KI387_029546,Novel00871,gene-KI387_035593,gene-KI387_027178,gene-KI387_033235,gene-KI387_007414,gene-KI387_024908,gene-KI387_002877,gene-KI387_030933,gene-KI387_012576,gene-KI387_005435,gene-KI387_000358,gene-KI387_034378,gene-KI387_016284,Novel00496,gene-KI387_024907,gene-KI387_027845,Novel04616,gene-KI387_030934,gene-KI387_020044,gene-KI387_017047,gene-KI387_033421,Novel0…
GO:0030547	receptor inhibitor activity	molecular_function	0.21288	1	3	2561	15	24160	gene-KI387_020805,gene-KI387_014966,gene-KI387_014964
GO:0030548	acetylcholine receptor regulator activity	molecular_function	0.21288	1	3	2561	15	24160	gene-KI387_014966,gene-KI387_014964,gene-KI387_020805
GO:0030550	acetylcholine receptor inhibitor activity	molecular_function	0.21288	1	3	2561	15	24160	gene-KI387_020805,gene-KI387_014964,gene-KI387_014966
GO:0099602	neurotransmitter receptor regulator activity	molecular_function	0.21288	1	3	2561	15	24160	gene-KI387_014966,gene-KI387_014964,gene-KI387_020805
GO:0022853	active ion transmembrane transporter activity	molecular_function	0.21305	1	16	2561	109	24160	gene-KI387_015139,gene-KI387_010262,gene-KI387_018689,gene-KI387_038848,gene-KI387_018341,gene-KI387_033209,gene-KI387_030438,gene-KI387_021501,gene-KI387_020615,gene-KI387_009487,gene-KI387_009488,gene-KI387_039308,gene-KI387_005377,gene-KI387_006747,Novel01818,gene-KI387_006587
GO:0003951	NAD+ kinase activity	molecular_function	0.21357	1	2	2561	7	24160	Novel05342,gene-KI387_018123
GO:0006741	NADP biosynthetic process	biological_process	0.21357	1	2	2561	7	24160	Novel05342,gene-KI387_018123
GO:0008047	enzyme activator activity	molecular_function	0.2136	1	13	2561	100	24160	gene-KI387_037333,gene-KI387_023131,gene-KI387_018004,gene-KI387_010311,gene-KI387_032638,gene-KI387_022777,gene-KI387_031388,Novel04574,gene-KI387_038064,gene-KI387_012267,gene-KI387_018510,Novel01958,gene-KI387_011666
GO:0018196	peptidyl-asparagine modification	biological_process	0.214	1	1	2561	2	24160	gene-KI387_014579
GO:0018279	protein N-linked glycosylation via asparagine	biological_process	0.214	1	1	2561	2	24160	gene-KI387_014579
GO:0031966	mitochondrial membrane	cellular_component	0.21543	1	30	2561	240	24160	gene-KI387_002736,gene-KI387_002742,gene-KI387_018241,Novel03495,gene-KI387_036235,gene-KI387_010752,gene-KI387_014772,gene-KI387_026485,Novel07044,Novel07069,gene-KI387_024718,Novel05424,gene-KI387_035280,gene-KI387_023268,Novel04667,gene-KI387_033647,Novel00407,gene-KI387_018129,gene-KI387_008350,gene-KI387_044328,gene-KI387_025599,Novel03630,Novel03171,gene-KI387_002738,gene-KI387_034894,gene-…
GO:0032101	regulation of response to external stimulus	biological_process	0.21562	1	5	2561	30	24160	gene-KI387_035672,Novel06722,gene-KI387_034734,gene-KI387_035673,gene-KI387_016721
GO:0016627	oxidoreductase activity, acting on the CH-CH group of donors	molecular_function	0.21608	1	14	2561	103	24160	gene-KI387_013578,gene-KI387_036183,gene-KI387_039315,gene-KI387_030750,gene-KI387_024910,gene-KI387_021590,Novel00251,gene-KI387_011705,gene-KI387_027652,Novel01219,gene-KI387_035971,Novel05168,gene-KI387_034670,gene-KI387_031855
GO:0004017	adenylate kinase activity	molecular_function	0.21669	1	3	2561	14	24160	Novel06296,gene-KI387_026529,gene-KI387_007535
GO:0004222	metalloendopeptidase activity	molecular_function	0.2174	1	13	2561	88	24160	Novel04355,Novel02509,gene-KI387_022601,gene-KI387_008516,gene-KI387_003012,gene-KI387_006060,gene-KI387_015491,gene-KI387_032110,Novel04289,gene-KI387_012029,gene-KI387_035883,Novel02664,gene-KI387_005453
GO:0007291	sperm individualization	biological_process	0.2175	1	1	2561	3	24160	gene-KI387_016967
GO:0007349	cellularization	biological_process	0.2175	1	1	2561	3	24160	gene-KI387_016967
GO:0035556	intracellular signal transduction	biological_process	0.21767	1	28	2561	207	24160	gene-KI387_018956,Novel02256,gene-KI387_037433,gene-KI387_034734,gene-KI387_026365,gene-KI387_013060,gene-KI387_018044,gene-KI387_008871,Novel00840,Novel07069,gene-KI387_026663,gene-KI387_033235,gene-KI387_005156,Novel05459,gene-KI387_029628,gene-KI387_034371,Novel04574,gene-KI387_035882,gene-KI387_018046,gene-KI387_038769,gene-KI387_016849,gene-KI387_026686,gene-KI387_013595,gene-KI387_019346,ge…
GO:0003994	aconitate hydratase activity	molecular_function	0.21874	1	2	2561	7	24160	gene-KI387_005815,gene-KI387_038848
GO:0006480	N-terminal protein amino acid methylation	biological_process	0.22023	1	3	2561	15	24160	gene-KI387_009670,gene-KI387_021829,gene-KI387_019280
GO:0019685	photosynthesis, dark reaction	biological_process	0.22063	1	2	2561	7	24160	gene-KI387_036227,Novel05750
GO:0000408	EKC/KEOPS complex	cellular_component	0.22086	1	2	2561	13	24160	gene-KI387_002879,gene-KI387_002877
GO:0009888	tissue development	biological_process	0.2226	1	6	2561	39	24160	Novel06191,gene-KI387_024614,gene-KI387_031230,gene-KI387_016369,gene-KI387_035742,gene-KI387_009714
GO:0004797	thymidine kinase activity	molecular_function	0.22272	1	2	2561	9	24160	gene-KI387_019508,gene-KI387_008921
GO:0019136	deoxynucleoside kinase activity	molecular_function	0.22272	1	2	2561	9	24160	gene-KI387_008921,gene-KI387_019508
GO:0019206	nucleoside kinase activity	molecular_function	0.22272	1	2	2561	9	24160	gene-KI387_008921,gene-KI387_019508
GO:0030198	extracellular matrix organization	biological_process	0.22284	1	2	2561	8	24160	gene-KI387_025599,gene-KI387_029812
GO:0043062	extracellular structure organization	biological_process	0.22284	1	2	2561	8	24160	gene-KI387_025599,gene-KI387_029812
GO:0005892	acetylcholine-gated channel complex	cellular_component	0.22323	1	1	2561	2	24160	gene-KI387_030918
GO:0043235	receptor complex	cellular_component	0.22323	1	1	2561	2	24160	gene-KI387_030918
GO:0098802	plasma membrane signaling receptor complex	cellular_component	0.22323	1	1	2561	2	24160	gene-KI387_030918
GO:0009116	nucleoside metabolic process	biological_process	0.22378	1	9	2561	55	24160	gene-KI387_009991,gene-KI387_022690,gene-KI387_032162,gene-KI387_025073,gene-KI387_024606,gene-KI387_032152,gene-KI387_043267,gene-KI387_008557,gene-KI387_028643
GO:1901657	glycosyl compound metabolic process	biological_process	0.22378	1	9	2561	55	24160	gene-KI387_008557,gene-KI387_043267,gene-KI387_028643,gene-KI387_025073,gene-KI387_032152,gene-KI387_024606,gene-KI387_022690,gene-KI387_032162,gene-KI387_009991
GO:0005938	cell cortex	cellular_component	0.22408	1	12	2561	82	24160	gene-KI387_010395,gene-KI387_023267,Novel03071,gene-KI387_008667,gene-KI387_006619,gene-KI387_007886,gene-KI387_034458,gene-KI387_005757,gene-KI387_023268,gene-KI387_037271,gene-KI387_029896,gene-KI387_014387
GO:0004668	protein-arginine deiminase activity	molecular_function	0.22429	1	1	2561	2	24160	gene-KI387_009433
GO:0019725	cellular homeostasis	biological_process	0.22517	1	18	2561	151	24160	gene-KI387_021973,gene-KI387_002162,gene-KI387_009544,gene-KI387_038769,gene-KI387_026888,gene-KI387_035926,gene-KI387_004819,Novel01687,gene-KI387_011006,gene-KI387_012522,gene-KI387_010574,gene-KI387_024703,gene-KI387_018216,Novel03745,gene-KI387_023612,gene-KI387_033235,gene-KI387_030057,gene-KI387_039791
GO:0032266	phosphatidylinositol-3-phosphate binding	molecular_function	0.2255	1	2	2561	8	24160	gene-KI387_006517,gene-KI387_035557
GO:0018130	heterocycle biosynthetic process	biological_process	0.22779	1	266	2561	2346	24160	gene-KI387_032850,gene-KI387_027652,Novel01918,gene-KI387_010321,gene-KI387_012823,gene-KI387_007975,gene-KI387_001414,gene-KI387_012217,gene-KI387_016790,gene-KI387_020391,gene-KI387_027969,Novel03705,gene-KI387_030920,gene-KI387_034627,gene-KI387_020139,Novel00594,gene-KI387_037606,gene-KI387_031493,gene-KI387_009252,gene-KI387_028824,gene-KI387_025073,gene-KI387_021471,gene-KI387_037751,gene-K…
GO:0003796	lysozyme activity	molecular_function	0.22933	1	1	2561	2	24160	Novel05537
GO:0019843	rRNA binding	molecular_function	0.22975	1	4	2561	26	24160	gene-KI387_013619,gene-KI387_025872,gene-KI387_035314,gene-KI387_000263
GO:0044550	secondary metabolite biosynthetic process	biological_process	0.23086	1	4	2561	22	24160	Novel02052,gene-KI387_033152,gene-KI387_013144,gene-KI387_003726
GO:0030278	regulation of ossification	biological_process	0.23089	1	1	2561	3	24160	gene-KI387_024614
GO:0006027	glycosaminoglycan catabolic process	biological_process	0.23256	1	2	2561	10	24160	gene-KI387_012882,Novel05537
GO:0009253	peptidoglycan catabolic process	biological_process	0.23256	1	2	2561	10	24160	gene-KI387_012882,Novel05537
GO:0061783	peptidoglycan muralytic activity	molecular_function	0.23256	1	2	2561	10	24160	gene-KI387_012882,Novel05537
GO:0045454	cell redox homeostasis	biological_process	0.23269	1	12	2561	99	24160	gene-KI387_009544,gene-KI387_023612,gene-KI387_018216,gene-KI387_024703,gene-KI387_010574,gene-KI387_012522,gene-KI387_011006,gene-KI387_039791,gene-KI387_004819,gene-KI387_035926,gene-KI387_026888,gene-KI387_038769
GO:0045735	nutrient reservoir activity	molecular_function	0.23447	1	13	2561	103	24160	gene-KI387_028378,gene-KI387_028376,Novel05397,gene-KI387_021215,gene-KI387_028381,Novel05031,gene-KI387_028371,gene-KI387_005436,gene-KI387_028336,gene-KI387_008417,gene-KI387_034627,gene-KI387_028334,gene-KI387_032476
GO:0004140	dephospho-CoA kinase activity	molecular_function	0.23465	1	2	2561	10	24160	gene-KI387_028236,gene-KI387_038959
GO:0007157	heterophilic cell-cell adhesion via plasma membrane cell adhesion molecules	biological_process	0.23517	1	1	2561	3	24160	Novel01428
GO:0098742	cell-cell adhesion via plasma-membrane adhesion molecules	biological_process	0.23517	1	1	2561	3	24160	Novel01428
GO:0004749	ribose phosphate diphosphokinase activity	molecular_function	0.23599	1	1	2561	2	24160	gene-KI387_024606
GO:0006366	transcription by RNA polymerase II	biological_process	0.23619	1	23	2561	187	24160	gene-KI387_016982,Novel01235,gene-KI387_027845,gene-KI387_007502,gene-KI387_007858,gene-KI387_017437,gene-KI387_009479,gene-KI387_003664,gene-KI387_023267,gene-KI387_018974,gene-KI387_027425,gene-KI387_019459,gene-KI387_002877,gene-KI387_034993,gene-KI387_002879,Novel00871,gene-KI387_006093,gene-KI387_001414,gene-KI387_005470,gene-KI387_031983,gene-KI387_029522,gene-KI387_033785,gene-KI387_038625
GO:0042287	MHC protein binding	molecular_function	0.23625	1	2	2561	7	24160	gene-KI387_035431,Novel05049
GO:0042289	MHC class II protein binding	molecular_function	0.23625	1	2	2561	7	24160	gene-KI387_035431,Novel05049
GO:0009512	cytochrome b6f complex	cellular_component	0.23631	1	3	2561	16	24160	Novel04609,gene-KI387_025395,gene-KI387_001249
GO:0016636	oxidoreductase activity, acting on the CH-CH group of donors, iron-sulfur protein as acceptor	molecular_function	0.23657	1	3	2561	14	24160	gene-KI387_024910,Novel05168,gene-KI387_035971
GO:0042168	heme metabolic process	biological_process	0.23672	1	2	2561	8	24160	gene-KI387_027652,gene-KI387_034742
GO:0006370	7-methylguanosine mRNA capping	biological_process	0.23709	1	2	2561	8	24160	gene-KI387_023692,gene-KI387_013487
GO:0045046	protein import into peroxisome membrane	biological_process	0.23865	1	1	2561	3	24160	gene-KI387_011006
GO:0004571	mannosyl-oligosaccharide 1,2-alpha-mannosidase activity	molecular_function	0.23892	1	2	2561	8	24160	gene-KI387_035939,gene-KI387_026897
GO:0015924	mannosyl-oligosaccharide mannosidase activity	molecular_function	0.23892	1	2	2561	8	24160	gene-KI387_026897,gene-KI387_035939
GO:0005094	Rho GDP-dissociation inhibitor activity	molecular_function	0.23962	1	1	2561	3	24160	gene-KI387_032081
GO:0033178	proton-transporting two-sector ATPase complex, catalytic domain	cellular_component	0.23962	1	10	2561	64	24160	gene-KI387_018689,gene-KI387_038848,gene-KI387_034894,Novel01818,gene-KI387_014772,gene-KI387_025064,Novel05551,gene-KI387_035419,gene-KI387_035280,gene-KI387_021501
GO:0044237	cellular metabolic process	biological_process	0.24019	1	908	2561	8165	24160	gene-KI387_010362,gene-KI387_029882,gene-KI387_006914,gene-KI387_034993,gene-KI387_013763,gene-KI387_029221,gene-KI387_011758,gene-KI387_033331,gene-KI387_014584,gene-KI387_019809,gene-KI387_035959,Novel01099,gene-KI387_032005,gene-KI387_029490,Novel00755,gene-KI387_028801,gene-KI387_037678,gene-KI387_007867,gene-KI387_042919,gene-KI387_028447,gene-KI387_017946,Novel00922,Novel01358,gene-KI387_03…
GO:0008715	CDP-diacylglycerol diphosphatase activity	molecular_function	0.24029	1	1	2561	2	24160	gene-KI387_002400
GO:0034404	nucleobase-containing small molecule biosynthetic process	biological_process	0.24045	1	5	2561	31	24160	gene-KI387_002048,gene-KI387_028643,gene-KI387_008557,gene-KI387_022690,gene-KI387_004168
GO:0032422	purine-rich negative regulatory element binding	molecular_function	0.24047	1	1	2561	2	24160	gene-KI387_001442
GO:0007281	germ cell development	biological_process	0.24072	1	4	2561	25	24160	gene-KI387_016369,gene-KI387_035742,gene-KI387_031230,gene-KI387_016967
GO:0004037	allantoicase activity	molecular_function	0.24117	1	1	2561	2	24160	Novel04874
GO:0004656	procollagen-proline 4-dioxygenase activity	molecular_function	0.24231	1	1	2561	3	24160	gene-KI387_019429
GO:0019798	procollagen-proline dioxygenase activity	molecular_function	0.24231	1	1	2561	3	24160	gene-KI387_019429
GO:0031543	peptidyl-proline dioxygenase activity	molecular_function	0.24231	1	1	2561	3	24160	gene-KI387_019429
GO:0031545	peptidyl-proline 4-dioxygenase activity	molecular_function	0.24231	1	1	2561	3	24160	gene-KI387_019429
GO:0050530	glucosylglycerol 3-phosphatase activity	molecular_function	0.24241	1	1	2561	2	24160	gene-KI387_007414
GO:0008289	lipid binding	molecular_function	0.24329	1	19	2561	137	24160	gene-KI387_002440,Novel00649,gene-KI387_006517,gene-KI387_021451,gene-KI387_037409,gene-KI387_026659,gene-KI387_032636,gene-KI387_016142,gene-KI387_015741,gene-KI387_031068,gene-KI387_031493,gene-KI387_022340,Novel03071,gene-KI387_035557,gene-KI387_032188,gene-KI387_011561,gene-KI387_031266,gene-KI387_016715,Novel01054
GO:0016482	cytosolic transport	biological_process	0.24387	1	2	2561	8	24160	gene-KI387_006357,gene-KI387_005492
GO:0042147	retrograde transport, endosome to Golgi	biological_process	0.24387	1	2	2561	8	24160	gene-KI387_006357,gene-KI387_005492
GO:0046873	metal ion transmembrane transporter activity	molecular_function	0.24407	1	34	2561	264	24160	Novel01687,gene-KI387_024902,gene-KI387_014584,gene-KI387_021973,gene-KI387_013289,gene-KI387_000588,gene-KI387_032445,gene-KI387_017651,gene-KI387_030057,gene-KI387_009658,gene-KI387_018341,gene-KI387_034734,gene-KI387_001721,Novel03809,gene-KI387_020139,Novel03745,gene-KI387_001584,gene-KI387_033235,gene-KI387_032443,gene-KI387_005377,gene-KI387_016078,Novel01113,Novel00336,gene-KI387_002162,ge…
GO:0008851	ethanolamine ammonia-lyase activity	molecular_function	0.24435	1	1	2561	2	24160	gene-KI387_025888
GO:0016841	ammonia-lyase activity	molecular_function	0.24435	1	1	2561	2	24160	gene-KI387_025888
GO:0016831	carboxy-lyase activity	molecular_function	0.24468	1	14	2561	103	24160	gene-KI387_024158,gene-KI387_025209,Novel01219,gene-KI387_030823,gene-KI387_035760,gene-KI387_025073,gene-KI387_004864,gene-KI387_029489,gene-KI387_038701,gene-KI387_000885,gene-KI387_020139,gene-KI387_015818,gene-KI387_008351,gene-KI387_031026
GO:0031975	envelope	cellular_component	0.24571	1	36	2561	297	24160	Novel03210,gene-KI387_036235,gene-KI387_026485,gene-KI387_014772,Novel07069,gene-KI387_024718,Novel05424,gene-KI387_033732,gene-KI387_023268,gene-KI387_035890,Novel04667,gene-KI387_018129,gene-KI387_028953,gene-KI387_044328,gene-KI387_017178,gene-KI387_025064,gene-KI387_033331,gene-KI387_030923,gene-KI387_019016,gene-KI387_002736,gene-KI387_002742,gene-KI387_018241,Novel03495,gene-KI387_010752,No…
GO:0050829	defense response to Gram-negative bacterium	biological_process	0.24698	1	2	2561	8	24160	gene-KI387_001400,gene-KI387_002400
GO:0016805	dipeptidase activity	molecular_function	0.24833	1	1	2561	2	24160	Novel07421
GO:0022613	ribonucleoprotein complex biogenesis	biological_process	0.24919	1	22	2561	179	24160	gene-KI387_023029,gene-KI387_024709,Novel03002,gene-KI387_005958,gene-KI387_016545,gene-KI387_033528,gene-KI387_006674,gene-KI387_005739,gene-KI387_008350,gene-KI387_019063,Novel06050,gene-KI387_028812,gene-KI387_011450,gene-KI387_027813,gene-KI387_032110,gene-KI387_002940,gene-KI387_010745,gene-KI387_035541,gene-KI387_036906,gene-KI387_019145,gene-KI387_026298,gene-KI387_004305
GO:0005215	transporter activity	molecular_function	0.2493	1	178	2561	1493	24160	gene-KI387_012036,gene-KI387_026421,gene-KI387_033732,gene-KI387_004952,Novel07069,Novel02559,gene-KI387_001098,gene-KI387_034734,gene-KI387_008472,gene-KI387_039798,gene-KI387_028472,Novel03809,gene-KI387_013081,gene-KI387_027344,Novel03745,gene-KI387_034993,gene-KI387_019016,gene-KI387_022555,gene-KI387_015030,gene-KI387_014584,gene-KI387_035682,gene-KI387_030967,gene-KI387_027336,gene-KI387_02…
GO:0009163	nucleoside biosynthetic process	biological_process	0.24962	1	3	2561	14	24160	gene-KI387_022690,gene-KI387_008557,gene-KI387_028643
GO:0042455	ribonucleoside biosynthetic process	biological_process	0.24962	1	3	2561	14	24160	gene-KI387_022690,gene-KI387_008557,gene-KI387_028643
GO:1901659	glycosyl compound biosynthetic process	biological_process	0.24962	1	3	2561	14	24160	gene-KI387_028643,gene-KI387_008557,gene-KI387_022690
GO:0098519	nucleotide phosphatase activity, acting on free nucleotides	molecular_function	0.25025	1	10	2561	62	24160	gene-KI387_003811,gene-KI387_003318,gene-KI387_018052,gene-KI387_037686,gene-KI387_003806,gene-KI387_012918,gene-KI387_033938,gene-KI387_028330,gene-KI387_003306,gene-KI387_020344
GO:0008813	chorismate lyase activity	molecular_function	0.25157	1	1	2561	2	24160	gene-KI387_034213
GO:0010033	response to organic substance	biological_process	0.25199	1	15	2561	116	24160	gene-KI387_004191,gene-KI387_039891,gene-KI387_024079,gene-KI387_016635,gene-KI387_024347,gene-KI387_037340,gene-KI387_031514,Novel03376,gene-KI387_019145,gene-KI387_019459,gene-KI387_035508,Novel03716,gene-KI387_012888,gene-KI387_026607,gene-KI387_017240
GO:0048646	anatomical structure formation involved in morphogenesis	biological_process	0.25204	1	4	2561	26	24160	gene-KI387_031230,gene-KI387_016967,gene-KI387_016369,gene-KI387_035742
GO:0046164	alcohol catabolic process	biological_process	0.25335	1	2	2561	10	24160	gene-KI387_011792,gene-KI387_011785
GO:0046174	polyol catabolic process	biological_process	0.25335	1	2	2561	10	24160	gene-KI387_011785,gene-KI387_011792
GO:1901616	organic hydroxy compound catabolic process	biological_process	0.25335	1	2	2561	10	24160	gene-KI387_011785,gene-KI387_011792
GO:0009678	pyrophosphate hydrolysis-driven proton transmembrane transporter activity	molecular_function	0.25339	1	9	2561	61	24160	gene-KI387_039308,gene-KI387_033209,Novel01818,gene-KI387_006587,gene-KI387_038848,gene-KI387_018689,gene-KI387_020615,gene-KI387_021501,gene-KI387_010262
GO:0044271	cellular nitrogen compound biosynthetic process	biological_process	0.25373	1	357	2561	3177	24160	Novel05750,Novel05342,gene-KI387_011882,gene-KI387_017370,Novel00922,Novel01358,gene-KI387_001400,gene-KI387_006291,gene-KI387_031729,gene-KI387_035418,gene-KI387_032181,gene-KI387_010307,gene-KI387_003374,gene-KI387_043193,gene-KI387_039861,gene-KI387_010667,gene-KI387_038717,gene-KI387_006788,gene-KI387_034993,gene-KI387_029882,Novel03017,Novel04888,gene-KI387_001399,Novel01589,gene-KI387_01805…
GO:0003756	protein disulfide isomerase activity	molecular_function	0.25425	1	1	2561	2	24160	gene-KI387_011850
GO:0016864	intramolecular oxidoreductase activity, transposing S-S bonds	molecular_function	0.25425	1	1	2561	2	24160	gene-KI387_011850
GO:0032509	endosome transport via multivesicular body sorting pathway	biological_process	0.25443	1	1	2561	2	24160	Novel05199
GO:0035240	dopamine binding	molecular_function	0.25447	1	1	2561	2	24160	gene-KI387_022425
GO:0042132	fructose 1,6-bisphosphate 1-phosphatase activity	molecular_function	0.25447	1	1	2561	2	24160	gene-KI387_010870
GO:0060967	negative regulation of gene silencing by RNA	biological_process	0.25447	1	1	2561	2	24160	gene-KI387_029292
GO:0060969	negative regulation of gene silencing	biological_process	0.25447	1	1	2561	2	24160	gene-KI387_029292
GO:0072544	L-DOPA binding	molecular_function	0.25447	1	1	2561	2	24160	gene-KI387_022425
GO:0072545	tyrosine binding	molecular_function	0.25447	1	1	2561	2	24160	gene-KI387_022425
GO:1901338	catecholamine binding	molecular_function	0.25447	1	1	2561	2	24160	gene-KI387_022425
GO:0008964	phosphoenolpyruvate carboxylase activity	molecular_function	0.25447	1	1	2561	2	24160	gene-KI387_015818
GO:0009237	siderophore metabolic process	biological_process	0.25447	1	1	2561	2	24160	gene-KI387_033152
GO:0019290	siderophore biosynthetic process	biological_process	0.25447	1	1	2561	2	24160	gene-KI387_033152
GO:0009279	cell outer membrane	cellular_component	0.25465	1	2	2561	8	24160	Novel03210,gene-KI387_028953
GO:0000270	peptidoglycan metabolic process	biological_process	0.2551	1	2	2561	11	24160	Novel05537,gene-KI387_012882
GO:0017121	plasma membrane phospholipid scrambling	biological_process	0.25548	1	1	2561	5	24160	gene-KI387_026064
GO:0017128	phospholipid scramblase activity	molecular_function	0.25548	1	1	2561	5	24160	gene-KI387_026064
GO:0034204	lipid translocation	biological_process	0.25548	1	1	2561	5	24160	gene-KI387_026064
GO:0045332	phospholipid translocation	biological_process	0.25548	1	1	2561	5	24160	gene-KI387_026064
GO:0097035	regulation of membrane lipid distribution	biological_process	0.25548	1	1	2561	5	24160	gene-KI387_026064
GO:0140303	intramembrane lipid transporter activity	molecular_function	0.25548	1	1	2561	5	24160	gene-KI387_026064
GO:0003993	acid phosphatase activity	molecular_function	0.25768	1	4	2561	21	24160	gene-KI387_022313,gene-KI387_017170,gene-KI387_007071,gene-KI387_004095
GO:0071805	potassium ion transmembrane transport	biological_process	0.25867	1	6	2561	35	24160	gene-KI387_001721,gene-KI387_009504,gene-KI387_006314,gene-KI387_014600,gene-KI387_009658,Novel02854
GO:0016628	oxidoreductase activity, acting on the CH-CH group of donors, NAD or NADP as acceptor	molecular_function	0.25999	1	5	2561	37	24160	gene-KI387_036183,gene-KI387_013578,gene-KI387_021590,gene-KI387_011705,gene-KI387_030750
GO:0019882	antigen processing and presentation	biological_process	0.26005	1	3	2561	17	24160	gene-KI387_002431,Novel05049,gene-KI387_035431
GO:0007009	plasma membrane organization	biological_process	0.26015	1	2	2561	11	24160	gene-KI387_026264,gene-KI387_026064
GO:0006364	rRNA processing	biological_process	0.26128	1	14	2561	109	24160	gene-KI387_028812,gene-KI387_005958,Novel03002,gene-KI387_016545,gene-KI387_024709,gene-KI387_004305,gene-KI387_019145,gene-KI387_026298,gene-KI387_036906,gene-KI387_033528,gene-KI387_027813,gene-KI387_011450,gene-KI387_005739,gene-KI387_032110
GO:0016072	rRNA metabolic process	biological_process	0.26128	1	14	2561	109	24160	gene-KI387_027813,gene-KI387_033528,gene-KI387_011450,gene-KI387_005739,gene-KI387_032110,gene-KI387_004305,gene-KI387_026298,gene-KI387_019145,gene-KI387_036906,gene-KI387_024709,gene-KI387_005958,gene-KI387_028812,Novel03002,gene-KI387_016545
GO:0009292	genetic transfer	biological_process	0.26232	1	2	2561	9	24160	gene-KI387_000885,gene-KI387_035971
GO:0015977	carbon fixation	biological_process	0.26348	1	2	2561	8	24160	gene-KI387_000885,gene-KI387_015818
GO:0008649	rRNA methyltransferase activity	molecular_function	0.2653	1	3	2561	16	24160	gene-KI387_019145,gene-KI387_036906,gene-KI387_033528
GO:0140102	catalytic activity, acting on a rRNA	molecular_function	0.2653	1	3	2561	16	24160	gene-KI387_033528,gene-KI387_019145,gene-KI387_036906
GO:0007186	G protein-coupled receptor signaling pathway	biological_process	0.26691	1	23	2561	205	24160	gene-KI387_028491,gene-KI387_003814,gene-KI387_008872,gene-KI387_012888,gene-KI387_036274,gene-KI387_015465,gene-KI387_034734,gene-KI387_017746,gene-KI387_028126,gene-KI387_030824,gene-KI387_019081,gene-KI387_029221,gene-KI387_031514,gene-KI387_019145,gene-KI387_025520,gene-KI387_018123,gene-KI387_034236,gene-KI387_022425,gene-KI387_005536,gene-KI387_030231,gene-KI387_012774,gene-KI387_016526,gen…
GO:0009878	nodule morphogenesis	biological_process	0.26798	1	2	2561	10	24160	gene-KI387_025347,Novel00095
GO:0044111	development involved in symbiotic interaction	biological_process	0.26798	1	2	2561	10	24160	Novel00095,gene-KI387_025347
GO:0008770	[acyl-carrier-protein] phosphodiesterase activity	molecular_function	0.26809	1	1	2561	3	24160	Novel00755
GO:0016843	amine-lyase activity	molecular_function	0.26816	1	2	2561	8	24160	gene-KI387_017280,gene-KI387_033055
GO:0016844	strictosidine synthase activity	molecular_function	0.26816	1	2	2561	8	24160	gene-KI387_017280,gene-KI387_033055
GO:0051287	NAD binding	molecular_function	0.27167	1	24	2561	179	24160	gene-KI387_024281,gene-KI387_038840,gene-KI387_027202,gene-KI387_012550,gene-KI387_005638,gene-KI387_011705,gene-KI387_031756,gene-KI387_029882,gene-KI387_030645,gene-KI387_020139,gene-KI387_021598,gene-KI387_011918,gene-KI387_026259,gene-KI387_003087,gene-KI387_001410,gene-KI387_004819,gene-KI387_009489,gene-KI387_019408,gene-KI387_014285,Novel01235,gene-KI387_039188,gene-KI387_033131,gene-KI387…
GO:0046677	response to antibiotic	biological_process	0.27174	1	3	2561	22	24160	gene-KI387_018125,gene-KI387_014742,gene-KI387_013150
GO:0006984	ER-nucleus signaling pathway	biological_process	0.27252	1	1	2561	3	24160	gene-KI387_003664
GO:0006991	response to sterol depletion	biological_process	0.27252	1	1	2561	3	24160	gene-KI387_003664
GO:0032933	SREBP signaling pathway	biological_process	0.27252	1	1	2561	3	24160	gene-KI387_003664
GO:0071501	cellular response to sterol depletion	biological_process	0.27252	1	1	2561	3	24160	gene-KI387_003664
GO:0048472	threonine-phosphate decarboxylase activity	molecular_function	0.27281	1	1	2561	3	24160	gene-KI387_031026
GO:0005315	inorganic phosphate transmembrane transporter activity	molecular_function	0.27318	1	2	2561	10	24160	gene-KI387_032173,gene-KI387_037885
GO:0016624	oxidoreductase activity, acting on the aldehyde or oxo group of donors, disulfide as acceptor	molecular_function	0.27434	1	6	2561	35	24160	gene-KI387_026303,gene-KI387_006517,gene-KI387_004306,gene-KI387_034266,gene-KI387_017394,gene-KI387_039159
GO:0071771	aldehyde decarbonylase activity	molecular_function	0.27453	1	1	2561	3	24160	gene-KI387_009186
GO:0008360	regulation of cell shape	biological_process	0.27666	1	1	2561	3	24160	gene-KI387_003367
GO:0022604	regulation of cell morphogenesis	biological_process	0.27666	1	1	2561	3	24160	gene-KI387_003367
GO:0016197	endosomal transport	biological_process	0.27739	1	3	2561	15	24160	gene-KI387_005492,gene-KI387_006357,Novel05199
GO:0008175	tRNA methyltransferase activity	molecular_function	0.2775	1	6	2561	38	24160	gene-KI387_006188,gene-KI387_006187,gene-KI387_011450,gene-KI387_027813,Novel07116,Novel00140
GO:1901575	organic substance catabolic process	biological_process	0.27825	1	62	2561	530	24160	Novel04874,gene-KI387_000710,gene-KI387_019247,gene-KI387_014525,gene-KI387_039315,gene-KI387_015549,gene-KI387_028454,gene-KI387_012774,gene-KI387_012882,gene-KI387_033437,gene-KI387_021877,Novel05537,gene-KI387_035280,gene-KI387_016502,gene-KI387_005309,gene-KI387_022290,gene-KI387_035983,gene-KI387_023131,gene-KI387_019578,gene-KI387_022767,gene-KI387_020865,Novel03474,gene-KI387_035754,gene-K…
GO:0031967	organelle envelope	cellular_component	0.28108	1	34	2561	285	24160	gene-KI387_036235,gene-KI387_033732,Novel05424,gene-KI387_024718,Novel07069,gene-KI387_014772,gene-KI387_026485,gene-KI387_044328,gene-KI387_018129,Novel04667,gene-KI387_035890,gene-KI387_023268,gene-KI387_019016,gene-KI387_030923,gene-KI387_033331,gene-KI387_025064,gene-KI387_017178,Novel03495,gene-KI387_018241,gene-KI387_002742,gene-KI387_002736,Novel07044,gene-KI387_010752,gene-KI387_008350,ge…
GO:0045095	keratin filament	cellular_component	0.28206	1	3	2561	19	24160	gene-KI387_024647,gene-KI387_017619,gene-KI387_013451
GO:1990837	sequence-specific double-stranded DNA binding	molecular_function	0.28267	1	3	2561	19	24160	gene-KI387_033785,gene-KI387_032427,gene-KI387_001442
GO:0034654	nucleobase-containing compound biosynthetic process	biological_process	0.28285	1	241	2561	2146	24160	gene-KI387_012620,gene-KI387_009463,gene-KI387_014528,gene-KI387_026339,gene-KI387_022690,gene-KI387_038959,gene-KI387_001795,gene-KI387_042806,gene-KI387_006093,gene-KI387_035687,gene-KI387_011991,Novel06031,gene-KI387_024347,Novel04876,gene-KI387_039280,Novel01987,gene-KI387_000263,gene-KI387_035426,gene-KI387_034799,gene-KI387_004168,Novel05318,gene-KI387_035419,gene-KI387_005437,gene-KI387_01…
GO:0009152	purine ribonucleotide biosynthetic process	biological_process	0.28331	1	18	2561	148	24160	gene-KI387_004986,gene-KI387_014772,gene-KI387_038959,gene-KI387_022690,gene-KI387_026339,gene-KI387_009463,Novel07069,Novel05887,Novel00407,gene-KI387_035280,gene-KI387_008557,gene-KI387_035919,gene-KI387_034894,gene-KI387_025064,gene-KI387_037409,gene-KI387_028236,gene-KI387_005181,gene-KI387_019016
GO:0004325	ferrochelatase activity	molecular_function	0.28381	1	1	2561	3	24160	gene-KI387_034742
GO:0016161	beta-amylase activity	molecular_function	0.28408	1	2	2561	8	24160	gene-KI387_015139,gene-KI387_035280
GO:0009309	amine biosynthetic process	biological_process	0.28471	1	3	2561	17	24160	gene-KI387_009433,gene-KI387_035760,gene-KI387_029489
GO:0042401	cellular biogenic amine biosynthetic process	biological_process	0.28471	1	3	2561	17	24160	gene-KI387_029489,gene-KI387_009433,gene-KI387_035760
GO:0016810	hydrolase activity, acting on carbon-nitrogen (but not peptide) bonds	molecular_function	0.28508	1	10	2561	76	24160	gene-KI387_022362,gene-KI387_026320,gene-KI387_012305,Novel04874,gene-KI387_004986,gene-KI387_012304,gene-KI387_026321,gene-KI387_012882,gene-KI387_003207,gene-KI387_009433
GO:0008771	[citrate (pro-3S)-lyase] ligase activity	molecular_function	0.28558	1	1	2561	3	24160	gene-KI387_009414
GO:0006542	glutamine biosynthetic process	biological_process	0.28661	1	2	2561	9	24160	gene-KI387_015468,gene-KI387_037286
GO:0044766	multi-organism transport	biological_process	0.28796	1	6	2561	42	24160	gene-KI387_006777,gene-KI387_019070,Novel04217,Novel05701,Novel00184,gene-KI387_017791
GO:0046794	transport of virus	biological_process	0.28796	1	6	2561	42	24160	gene-KI387_006777,gene-KI387_019070,gene-KI387_017791,Novel04217,Novel05701,Novel00184
GO:1902579	multi-organism localization	biological_process	0.28796	1	6	2561	42	24160	gene-KI387_019070,gene-KI387_006777,gene-KI387_017791,Novel04217,Novel05701,Novel00184
GO:0015035	protein disulfide oxidoreductase activity	molecular_function	0.2884	1	6	2561	47	24160	gene-KI387_011006,gene-KI387_038769,gene-KI387_024703,gene-KI387_032593,gene-KI387_026888,gene-KI387_009544
GO:0015036	disulfide oxidoreductase activity	molecular_function	0.2884	1	6	2561	47	24160	gene-KI387_009544,gene-KI387_011006,gene-KI387_024703,gene-KI387_032593,gene-KI387_038769,gene-KI387_026888
GO:0000105	histidine biosynthetic process	biological_process	0.28857	1	5	2561	35	24160	gene-KI387_022362,gene-KI387_031855,gene-KI387_024757,gene-KI387_019408,gene-KI387_030917
GO:0009085	lysine biosynthetic process	biological_process	0.28986	1	4	2561	30	24160	gene-KI387_032801,gene-KI387_021590,gene-KI387_011705,gene-KI387_036183
GO:0009089	lysine biosynthetic process via diaminopimelate	biological_process	0.28986	1	4	2561	30	24160	gene-KI387_032801,gene-KI387_021590,gene-KI387_011705,gene-KI387_036183
GO:0046451	diaminopimelate metabolic process	biological_process	0.28986	1	4	2561	30	24160	gene-KI387_036183,gene-KI387_032801,gene-KI387_021590,gene-KI387_011705
GO:0009260	ribonucleotide biosynthetic process	biological_process	0.29082	1	18	2561	149	24160	gene-KI387_005181,gene-KI387_028236,gene-KI387_034894,gene-KI387_025064,gene-KI387_037409,gene-KI387_019016,gene-KI387_035280,Novel00407,gene-KI387_035919,gene-KI387_008557,gene-KI387_038959,gene-KI387_014772,gene-KI387_009463,Novel05887,Novel07069,gene-KI387_026339,gene-KI387_022690,gene-KI387_004986
GO:0046390	ribose phosphate biosynthetic process	biological_process	0.29082	1	18	2561	149	24160	gene-KI387_014772,gene-KI387_038959,gene-KI387_026339,gene-KI387_022690,Novel07069,Novel05887,gene-KI387_009463,gene-KI387_004986,gene-KI387_037409,gene-KI387_034894,gene-KI387_025064,gene-KI387_028236,gene-KI387_005181,gene-KI387_019016,Novel00407,gene-KI387_035280,gene-KI387_008557,gene-KI387_035919
GO:0012505	endomembrane system	cellular_component	0.29103	1	59	2561	508	24160	gene-KI387_020139,Novel04242,gene-KI387_029292,Novel03154,gene-KI387_005492,Novel05199,gene-KI387_030897,Novel05424,Novel06915,gene-KI387_030057,gene-KI387_015465,Novel07580,gene-KI387_013507,Novel05921,gene-KI387_016020,gene-KI387_001692,gene-KI387_037505,gene-KI387_037885,gene-KI387_035890,gene-KI387_034893,Novel03544,gene-KI387_019429,Novel03812,gene-KI387_012216,gene-KI387_011850,gene-KI387_0…
GO:0072546	ER membrane protein complex	cellular_component	0.29121	1	1	2561	3	24160	gene-KI387_008390
GO:0004486	methylenetetrahydrofolate dehydrogenase [NAD(P)+] activity	molecular_function	0.29154	1	4	2561	25	24160	gene-KI387_009489,gene-KI387_036841,gene-KI387_036183,gene-KI387_021590
GO:0004488	methylenetetrahydrofolate dehydrogenase (NADP+) activity	molecular_function	0.29154	1	4	2561	25	24160	gene-KI387_021590,gene-KI387_036183,gene-KI387_036841,gene-KI387_009489
GO:0000323	lytic vacuole	cellular_component	0.29166	1	1	2561	3	24160	gene-KI387_005156
GO:0005764	lysosome	cellular_component	0.29166	1	1	2561	3	24160	gene-KI387_005156
GO:0009119	ribonucleoside metabolic process	biological_process	0.29286	1	4	2561	22	24160	gene-KI387_009991,gene-KI387_008557,gene-KI387_022690,gene-KI387_028643
GO:0002831	regulation of response to biotic stimulus	biological_process	0.29468	1	3	2561	19	24160	Novel06722,gene-KI387_035672,gene-KI387_035673
GO:0031347	regulation of defense response	biological_process	0.29468	1	3	2561	19	24160	gene-KI387_035673,Novel06722,gene-KI387_035672
GO:0045088	regulation of innate immune response	biological_process	0.29468	1	3	2561	19	24160	gene-KI387_035673,gene-KI387_035672,Novel06722
GO:0048029	monosaccharide binding	molecular_function	0.29645	1	2	2561	12	24160	Novel00856,gene-KI387_023692
GO:0051179	localization	biological_process	0.29686	1	347	2561	3043	24160	gene-KI387_037686,gene-KI387_018686,gene-KI387_026659,gene-KI387_003309,gene-KI387_003306,gene-KI387_006747,Novel01687,gene-KI387_009464,gene-KI387_018113,gene-KI387_018299,gene-KI387_037505,Novel07406,Novel05701,gene-KI387_013507,gene-KI387_001721,gene-KI387_038342,gene-KI387_009658,gene-KI387_013654,Novel04216,Novel03154,Novel01987,gene-KI387_043856,gene-KI387_004895,gene-KI387_010429,Novel0376…
GO:0031365	N-terminal protein amino acid modification	biological_process	0.29739	1	3	2561	17	24160	gene-KI387_019280,gene-KI387_009670,gene-KI387_021829
GO:0016603	glutaminyl-peptide cyclotransferase activity	molecular_function	0.29778	1	1	2561	3	24160	gene-KI387_035271
GO:0017186	peptidyl-pyroglutamic acid biosynthetic process, using glutaminyl-peptide cyclotransferase	biological_process	0.29778	1	1	2561	3	24160	gene-KI387_035271
GO:0018199	peptidyl-glutamine modification	biological_process	0.29778	1	1	2561	3	24160	gene-KI387_035271
GO:0006119	oxidative phosphorylation	biological_process	0.2979	1	4	2561	27	24160	Novel07044,gene-KI387_007472,Novel03043,Novel04127
GO:0042773	ATP synthesis coupled electron transport	biological_process	0.2979	1	4	2561	27	24160	Novel04127,Novel03043,gene-KI387_007472,Novel07044
GO:0043085	positive regulation of catalytic activity	biological_process	0.29807	1	3	2561	19	24160	gene-KI387_034734,gene-KI387_037333,Novel04574
GO:0044093	positive regulation of molecular function	biological_process	0.29807	1	3	2561	19	24160	Novel04574,gene-KI387_037333,gene-KI387_034734
GO:0035064	methylated histone binding	molecular_function	0.29854	1	1	2561	3	24160	Novel05617
GO:0140030	modification-dependent protein binding	molecular_function	0.29854	1	1	2561	3	24160	Novel05617
GO:0140034	methylation-dependent protein binding	molecular_function	0.29854	1	1	2561	3	24160	Novel05617
GO:0007608	sensory perception of smell	biological_process	0.29937	1	2	2561	9	24160	Novel06404,Novel06403
GO:0016160	amylase activity	molecular_function	0.30128	1	3	2561	15	24160	gene-KI387_035280,gene-KI387_015139,Novel03375
GO:0009229	thiamine diphosphate biosynthetic process	biological_process	0.30235	1	2	2561	10	24160	gene-KI387_002853,gene-KI387_014162
GO:0042357	thiamine diphosphate metabolic process	biological_process	0.30235	1	2	2561	10	24160	gene-KI387_014162,gene-KI387_002853
GO:0006547	histidine metabolic process	biological_process	0.30271	1	5	2561	36	24160	gene-KI387_030917,gene-KI387_019408,gene-KI387_024757,gene-KI387_031855,gene-KI387_022362
GO:0052803	imidazole-containing compound metabolic process	biological_process	0.30271	1	5	2561	36	24160	gene-KI387_019408,gene-KI387_030917,gene-KI387_024757,gene-KI387_031855,gene-KI387_022362
GO:0051381	histamine binding	molecular_function	0.30284	1	1	2561	3	24160	Novel03790
GO:0070026	nitric oxide binding	molecular_function	0.30284	1	1	2561	3	24160	Novel03790
GO:0030532	small nuclear ribonucleoprotein complex	cellular_component	0.30298	1	3	2561	19	24160	gene-KI387_006674,gene-KI387_026888,gene-KI387_023612
GO:0097525	spliceosomal snRNP complex	cellular_component	0.30298	1	3	2561	19	24160	gene-KI387_023612,gene-KI387_026888,gene-KI387_006674
GO:0120114	Sm-like protein family complex	cellular_component	0.30298	1	3	2561	19	24160	gene-KI387_023612,gene-KI387_006674,gene-KI387_026888
GO:0019748	secondary metabolic process	biological_process	0.30317	1	6	2561	41	24160	Novel02052,gene-KI387_027368,gene-KI387_033152,gene-KI387_013144,gene-KI387_003726,gene-KI387_025697
GO:0006308	DNA catabolic process	biological_process	0.30336	1	2	2561	10	24160	gene-KI387_033437,gene-KI387_033074
GO:0005845	mRNA cap binding complex	cellular_component	0.30343	1	1	2561	3	24160	gene-KI387_017137
GO:0034518	RNA cap binding complex	cellular_component	0.30343	1	1	2561	3	24160	gene-KI387_017137
GO:0009982	pseudouridine synthase activity	molecular_function	0.30348	1	3	2561	16	24160	Novel00158,gene-KI387_002582,Novel00259
GO:0022412	cellular process involved in reproduction in multicellular organism	biological_process	0.30351	1	4	2561	28	24160	gene-KI387_016967,gene-KI387_031230,gene-KI387_035742,gene-KI387_016369
GO:0015748	organophosphate ester transport	biological_process	0.30425	1	2	2561	11	24160	gene-KI387_030438,gene-KI387_026064
GO:0042110	T cell activation	biological_process	0.30469	1	1	2561	4	24160	gene-KI387_018046
GO:0044242	cellular lipid catabolic process	biological_process	0.30591	1	2	2561	10	24160	gene-KI387_020865,gene-KI387_039315
GO:0005985	sucrose metabolic process	biological_process	0.30633	1	3	2561	15	24160	gene-KI387_025580,gene-KI387_019070,gene-KI387_031081
GO:0008914	leucyltransferase activity	molecular_function	0.30719	1	1	2561	3	24160	gene-KI387_018341
GO:0006206	pyrimidine nucleobase metabolic process	biological_process	0.30923	1	2	2561	9	24160	gene-KI387_025073,gene-KI387_030823
GO:0019856	pyrimidine nucleobase biosynthetic process	biological_process	0.30923	1	2	2561	9	24160	gene-KI387_025073,gene-KI387_030823
GO:0001653	peptide receptor activity	molecular_function	0.31064	1	2	2561	12	24160	gene-KI387_028491,gene-KI387_015465
GO:0008528	G protein-coupled peptide receptor activity	molecular_function	0.31064	1	2	2561	12	24160	gene-KI387_015465,gene-KI387_028491
GO:0072528	pyrimidine-containing compound biosynthetic process	biological_process	0.31101	1	5	2561	32	24160	gene-KI387_024769,gene-KI387_025073,gene-KI387_030823,gene-KI387_014162,gene-KI387_002853
GO:0008252	nucleotidase activity	molecular_function	0.31177	1	2	2561	11	24160	gene-KI387_023314,gene-KI387_002048
GO:0008253	5-nucleotidase activity	molecular_function	0.31177	1	2	2561	11	24160	gene-KI387_023314,gene-KI387_002048
GO:0050776	regulation of immune response	biological_process	0.31347	1	5	2561	34	24160	Novel06722,gene-KI387_035672,gene-KI387_035673,gene-KI387_034371,Novel00871
GO:0004618	phosphoglycerate kinase activity	molecular_function	0.31458	1	2	2561	10	24160	gene-KI387_031072,gene-KI387_017946
GO:0006432	phenylalanyl-tRNA aminoacylation	biological_process	0.31462	1	1	2561	3	24160	Novel06683
GO:0006189	de novo IMP biosynthetic process	biological_process	0.31483	1	1	2561	3	24160	gene-KI387_035919
GO:0015075	ion transmembrane transporter activity	molecular_function	0.31603	1	93	2561	787	24160	gene-KI387_005824,gene-KI387_001721,gene-KI387_030057,gene-KI387_009463,gene-KI387_009658,gene-KI387_014644,gene-KI387_001584,gene-KI387_027900,gene-KI387_013451,gene-KI387_024902,gene-KI387_037409,gene-KI387_027901,gene-KI387_019488,gene-KI387_006747,gene-KI387_020224,Novel01687,gene-KI387_030451,gene-KI387_016529,gene-KI387_021501,gene-KI387_013289,gene-KI387_021973,gene-KI387_009487,gene-KI387…
GO:0042151	nematocyst	cellular_component	0.31629	1	2	2561	9	24160	gene-KI387_007886,gene-KI387_005757
GO:0035195	gene silencing by miRNA	biological_process	0.31648	1	1	2561	3	24160	gene-KI387_033816
GO:0060147	regulation of posttranscriptional gene silencing	biological_process	0.31648	1	1	2561	3	24160	gene-KI387_033816
GO:0060964	regulation of gene silencing by miRNA	biological_process	0.31648	1	1	2561	3	24160	gene-KI387_033816
GO:0004298	threonine-type endopeptidase activity	molecular_function	0.31685	1	4	2561	29	24160	gene-KI387_021849,gene-KI387_019865,gene-KI387_019247,gene-KI387_018662
GO:0070003	threonine-type peptidase activity	molecular_function	0.31685	1	4	2561	29	24160	gene-KI387_018662,gene-KI387_019247,gene-KI387_021849,gene-KI387_019865
GO:0003910	DNA ligase (ATP) activity	molecular_function	0.31807	1	2	2561	10	24160	gene-KI387_007380,gene-KI387_004765
GO:0051260	protein homooligomerization	biological_process	0.31866	1	2	2561	10	24160	gene-KI387_025156,gene-KI387_004584
GO:0006771	riboflavin metabolic process	biological_process	0.31965	1	3	2561	17	24160	gene-KI387_006788,gene-KI387_014214,gene-KI387_010260
GO:0009231	riboflavin biosynthetic process	biological_process	0.31965	1	3	2561	17	24160	gene-KI387_006788,gene-KI387_014214,gene-KI387_010260
GO:0042726	flavin-containing compound metabolic process	biological_process	0.31965	1	3	2561	17	24160	gene-KI387_010260,gene-KI387_006788,gene-KI387_014214
GO:0042727	flavin-containing compound biosynthetic process	biological_process	0.31965	1	3	2561	17	24160	gene-KI387_010260,gene-KI387_014214,gene-KI387_006788
GO:0004611	phosphoenolpyruvate carboxykinase activity	molecular_function	0.31993	1	3	2561	16	24160	gene-KI387_015818,gene-KI387_024158,gene-KI387_038701
GO:0060590	ATPase regulator activity	molecular_function	0.32199	1	5	2561	38	24160	gene-KI387_008480,Novel05551,gene-KI387_018510,Novel02032,gene-KI387_022201
GO:0008837	diaminopimelate epimerase activity	molecular_function	0.32356	1	1	2561	3	24160	gene-KI387_032801
GO:0047661	amino-acid racemase activity	molecular_function	0.32356	1	1	2561	3	24160	gene-KI387_032801
GO:0000287	magnesium ion binding	molecular_function	0.32395	1	21	2561	175	24160	gene-KI387_043176,gene-KI387_024606,gene-KI387_028802,gene-KI387_035521,gene-KI387_028997,gene-KI387_028801,gene-KI387_023314,gene-KI387_021696,gene-KI387_041058,gene-KI387_010745,gene-KI387_014654,gene-KI387_019626,Novel06680,gene-KI387_035754,gene-KI387_012135,gene-KI387_014653,gene-KI387_035983,gene-KI387_028330,gene-KI387_028988,Novel05887,gene-KI387_019627
GO:1901981	phosphatidylinositol phosphate binding	molecular_function	0.32488	1	2	2561	10	24160	gene-KI387_035557,gene-KI387_006517
GO:0042546	cell wall biogenesis	biological_process	0.32577	1	3	2561	17	24160	gene-KI387_025599,gene-KI387_029812,gene-KI387_038611
GO:0009379	Holliday junction helicase complex	cellular_component	0.32703	1	1	2561	4	24160	Novel07451
GO:0032922	circadian regulation of gene expression	biological_process	0.32733	1	1	2561	4	24160	gene-KI387_032427
GO:0030493	bacteriochlorophyll metabolic process	biological_process	0.32804	1	2	2561	9	24160	Novel05750,gene-KI387_036227
GO:0030494	bacteriochlorophyll biosynthetic process	biological_process	0.32804	1	2	2561	9	24160	Novel05750,gene-KI387_036227
GO:0070469	respirasome	cellular_component	0.32808	1	5	2561	35	24160	gene-KI387_030923,Novel07044,gene-KI387_008350,gene-KI387_007472,Novel04667
GO:0005839	proteasome core complex	cellular_component	0.33009	1	5	2561	40	24160	Novel02438,gene-KI387_021849,gene-KI387_019865,gene-KI387_018662,gene-KI387_019247
GO:0006766	vitamin metabolic process	biological_process	0.33099	1	10	2561	80	24160	gene-KI387_027081,gene-KI387_014214,gene-KI387_010260,gene-KI387_022362,gene-KI387_006788,gene-KI387_030750,gene-KI387_037212,gene-KI387_014788,gene-KI387_031026,gene-KI387_036923
GO:0006767	water-soluble vitamin metabolic process	biological_process	0.33099	1	10	2561	80	24160	gene-KI387_014214,gene-KI387_027081,gene-KI387_010260,gene-KI387_022362,gene-KI387_014788,gene-KI387_031026,gene-KI387_036923,gene-KI387_006788,gene-KI387_030750,gene-KI387_037212
GO:0009110	vitamin biosynthetic process	biological_process	0.33099	1	10	2561	80	24160	gene-KI387_027081,gene-KI387_014214,gene-KI387_022362,gene-KI387_010260,gene-KI387_014788,gene-KI387_036923,gene-KI387_031026,gene-KI387_006788,gene-KI387_030750,gene-KI387_037212
GO:0042364	water-soluble vitamin biosynthetic process	biological_process	0.33099	1	10	2561	80	24160	gene-KI387_037212,gene-KI387_030750,gene-KI387_006788,gene-KI387_036923,gene-KI387_031026,gene-KI387_014788,gene-KI387_010260,gene-KI387_022362,gene-KI387_027081,gene-KI387_014214
GO:0016872	intramolecular lyase activity	molecular_function	0.3314	1	3	2561	23	24160	gene-KI387_006250,gene-KI387_042616,gene-KI387_042612
GO:0004252	serine-type endopeptidase activity	molecular_function	0.33148	1	24	2561	189	24160	gene-KI387_035477,gene-KI387_001181,gene-KI387_019733,gene-KI387_039023,gene-KI387_033731,gene-KI387_022814,gene-KI387_008354,Novel03099,gene-KI387_005794,gene-KI387_010612,gene-KI387_011229,gene-KI387_020139,gene-KI387_001390,gene-KI387_024037,gene-KI387_011228,gene-KI387_013136,gene-KI387_015336,gene-KI387_026883,Novel04862,gene-KI387_017446,gene-KI387_011036,gene-KI387_010637,gene-KI387_008009…
GO:0015298	solute:cation antiporter activity	molecular_function	0.33223	1	4	2561	23	24160	gene-KI387_015139,gene-KI387_009487,gene-KI387_006747,gene-KI387_009488
GO:0015299	solute:proton antiporter activity	molecular_function	0.33223	1	4	2561	23	24160	gene-KI387_015139,gene-KI387_009487,gene-KI387_006747,gene-KI387_009488
GO:0034453	microtubule anchoring	biological_process	0.33229	1	1	2561	3	24160	gene-KI387_006174
GO:0070009	serine-type aminopeptidase activity	molecular_function	0.33261	1	2	2561	10	24160	gene-KI387_001390,gene-KI387_039023
GO:0003334	keratinocyte development	biological_process	0.33537	1	1	2561	3	24160	Novel06191
GO:0006351	transcription, DNA-templated	biological_process	0.33557	1	214	2561	1920	24160	gene-KI387_024908,Novel00871,gene-KI387_020139,gene-KI387_035593,gene-KI387_009252,gene-KI387_029546,gene-KI387_031493,gene-KI387_037606,Novel00594,gene-KI387_003777,gene-KI387_024907,gene-KI387_021471,gene-KI387_020044,gene-KI387_027845,gene-KI387_030934,gene-KI387_000358,gene-KI387_028824,gene-KI387_007858,gene-KI387_030933,gene-KI387_035413,gene-KI387_009479,gene-KI387_003664,gene-KI387_012576…
GO:0097659	nucleic acid-templated transcription	biological_process	0.33557	1	214	2561	1920	24160	gene-KI387_039861,gene-KI387_043193,gene-KI387_032181,gene-KI387_003374,gene-KI387_010307,Novel01986,Novel05555,gene-KI387_025413,Novel02843,gene-KI387_007094,gene-KI387_035418,gene-KI387_001400,Novel00922,gene-KI387_017370,gene-KI387_010320,gene-KI387_000859,gene-KI387_010591,gene-KI387_011882,Novel06991,gene-KI387_003010,gene-KI387_010322,gene-KI387_005272,Novel05750,gene-KI387_043970,gene-KI38…
GO:0048037	obsolete cofactor binding	molecular_function	0.33644	1	1	2561	3	24160	Novel05343
GO:0032774	RNA biosynthetic process	biological_process	0.33815	1	215	2561	1928	24160	gene-KI387_014528,gene-KI387_012620,gene-KI387_011991,gene-KI387_001795,gene-KI387_035687,gene-KI387_006093,gene-KI387_042806,Novel01987,gene-KI387_039280,gene-KI387_000263,Novel06031,Novel04876,gene-KI387_024347,gene-KI387_035419,gene-KI387_005437,gene-KI387_035426,Novel05318,gene-KI387_034799,gene-KI387_019459,gene-KI387_026933,gene-KI387_026686,gene-KI387_000711,gene-KI387_011998,gene-KI387_02…
GO:0000502	proteasome complex	cellular_component	0.33881	1	6	2561	50	24160	gene-KI387_019865,gene-KI387_021849,Novel02438,gene-KI387_027425,gene-KI387_018662,gene-KI387_019247
GO:1905369	endopeptidase complex	cellular_component	0.33881	1	6	2561	50	24160	gene-KI387_019865,gene-KI387_021849,Novel02438,gene-KI387_027425,gene-KI387_018662,gene-KI387_019247
GO:0006631	fatty acid metabolic process	biological_process	0.33889	1	20	2561	165	24160	gene-KI387_026868,gene-KI387_019345,gene-KI387_036098,Novel00672,gene-KI387_039339,gene-KI387_014285,Novel06459,gene-KI387_009489,gene-KI387_014640,gene-KI387_007867,gene-KI387_033131,Novel00755,gene-KI387_020972,gene-KI387_012250,Novel02836,gene-KI387_039315,gene-KI387_037648,Novel04839,gene-KI387_007868,Novel05424
GO:0005384	manganese ion transmembrane transporter activity	molecular_function	0.33916	1	2	2561	11	24160	gene-KI387_002162,gene-KI387_030057
GO:0030026	cellular manganese ion homeostasis	biological_process	0.33916	1	2	2561	11	24160	gene-KI387_002162,gene-KI387_030057
GO:0055071	manganese ion homeostasis	biological_process	0.33916	1	2	2561	11	24160	gene-KI387_030057,gene-KI387_002162
GO:0003333	amino acid transmembrane transport	biological_process	0.34065	1	4	2561	25	24160	gene-KI387_034755,gene-KI387_039007,Novel02921,gene-KI387_012659
GO:0006487	protein N-linked glycosylation	biological_process	0.34095	1	5	2561	33	24160	gene-KI387_014579,Novel00309,gene-KI387_030057,Novel05783,gene-KI387_014123
GO:0006784	heme A biosynthetic process	biological_process	0.34103	1	1	2561	3	24160	gene-KI387_027652
GO:0046160	heme a metabolic process	biological_process	0.34103	1	1	2561	3	24160	gene-KI387_027652
GO:0004424	imidazoleglycerol-phosphate dehydratase activity	molecular_function	0.34115	1	1	2561	3	24160	gene-KI387_024757
GO:0004014	adenosylmethionine decarboxylase activity	molecular_function	0.34209	1	2	2561	11	24160	gene-KI387_035760,gene-KI387_029489
GO:0006597	spermine biosynthetic process	biological_process	0.34209	1	2	2561	11	24160	gene-KI387_035760,gene-KI387_029489
GO:0008215	spermine metabolic process	biological_process	0.34209	1	2	2561	11	24160	gene-KI387_029489,gene-KI387_035760
GO:0008216	spermidine metabolic process	biological_process	0.34209	1	2	2561	11	24160	gene-KI387_035760,gene-KI387_029489
GO:0008295	spermidine biosynthetic process	biological_process	0.34209	1	2	2561	11	24160	gene-KI387_029489,gene-KI387_035760
GO:0031515	tRNA (m1A) methyltransferase complex	cellular_component	0.34242	1	2	2561	11	24160	gene-KI387_011450,gene-KI387_027813
GO:0034708	methyltransferase complex	cellular_component	0.34242	1	2	2561	11	24160	gene-KI387_011450,gene-KI387_027813
GO:0043527	tRNA methyltransferase complex	cellular_component	0.34242	1	2	2561	11	24160	gene-KI387_011450,gene-KI387_027813
GO:0048511	rhythmic process	biological_process	0.34314	1	3	2561	20	24160	gene-KI387_025413,gene-KI387_041058,gene-KI387_032427
GO:0006357	regulation of transcription by RNA polymerase II	biological_process	0.34319	1	13	2561	115	24160	gene-KI387_001414,gene-KI387_017437,gene-KI387_029522,gene-KI387_003664,gene-KI387_009479,gene-KI387_031983,gene-KI387_033785,gene-KI387_018974,gene-KI387_027425,gene-KI387_002877,gene-KI387_016982,gene-KI387_002879,gene-KI387_007502
GO:0001750	photoreceptor outer segment	cellular_component	0.34321	1	1	2561	4	24160	gene-KI387_009130
GO:0031253	cell projection membrane	cellular_component	0.34321	1	1	2561	4	24160	gene-KI387_009130
GO:0042622	photoreceptor outer segment membrane	cellular_component	0.34321	1	1	2561	4	24160	gene-KI387_009130
GO:0043005	neuron projection	cellular_component	0.34321	1	1	2561	4	24160	gene-KI387_009130
GO:0060170	ciliary membrane	cellular_component	0.34321	1	1	2561	4	24160	gene-KI387_009130
GO:0097730	non-motile cilium	cellular_component	0.34321	1	1	2561	4	24160	gene-KI387_009130
GO:0097731	9+0 non-motile cilium	cellular_component	0.34321	1	1	2561	4	24160	gene-KI387_009130
GO:0097733	photoreceptor cell cilium	cellular_component	0.34321	1	1	2561	4	24160	gene-KI387_009130
GO:0016877	ligase activity, forming carbon-sulfur bonds	molecular_function	0.34364	1	5	2561	32	24160	gene-KI387_014285,gene-KI387_003087,gene-KI387_009414,gene-KI387_011705,gene-KI387_026259
GO:0051536	iron-sulfur cluster binding	molecular_function	0.34366	1	19	2561	159	24160	gene-KI387_017324,gene-KI387_026442,gene-KI387_022421,gene-KI387_026438,gene-KI387_018415,gene-KI387_022745,gene-KI387_002742,gene-KI387_004292,Novel06722,gene-KI387_039279,gene-KI387_037434,gene-KI387_001249,gene-KI387_022807,gene-KI387_031774,gene-KI387_025440,gene-KI387_001642,gene-KI387_000255,Novel05423,gene-KI387_022835
GO:0051540	metal cluster binding	molecular_function	0.34366	1	19	2561	159	24160	gene-KI387_037434,gene-KI387_001249,gene-KI387_039279,gene-KI387_025440,gene-KI387_001642,Novel05423,gene-KI387_000255,gene-KI387_022835,gene-KI387_022807,gene-KI387_031774,gene-KI387_022421,gene-KI387_017324,gene-KI387_026442,gene-KI387_022745,gene-KI387_004292,gene-KI387_002742,Novel06722,gene-KI387_026438,gene-KI387_018415
GO:0000921	septin ring assembly	biological_process	0.34387	1	2	2561	12	24160	gene-KI387_023268,gene-KI387_023267
GO:0005940	septin ring	cellular_component	0.34387	1	2	2561	12	24160	gene-KI387_023268,gene-KI387_023267
GO:0031106	septin ring organization	biological_process	0.34387	1	2	2561	12	24160	gene-KI387_023268,gene-KI387_023267
GO:0032156	septin cytoskeleton	cellular_component	0.34387	1	2	2561	12	24160	gene-KI387_023267,gene-KI387_023268
GO:0032185	septin cytoskeleton organization	biological_process	0.34387	1	2	2561	12	24160	gene-KI387_023268,gene-KI387_023267
GO:0032065	maintenance of protein location in cell cortex	biological_process	0.34537	1	1	2561	4	24160	Novel03071
GO:0019205	nucleobase-containing compound kinase activity	molecular_function	0.3459	1	7	2561	50	24160	gene-KI387_038959,gene-KI387_012777,gene-KI387_026529,Novel06296,gene-KI387_019508,gene-KI387_007535,gene-KI387_008921
GO:0090305	nucleic acid phosphodiester bond hydrolysis	biological_process	0.34601	1	3	2561	21	24160	gene-KI387_022362,gene-KI387_002835,gene-KI387_002849
GO:0140103	catalytic activity, acting on a glycoprotein	molecular_function	0.34642	1	4	2561	30	24160	gene-KI387_014123,gene-KI387_010587,Novel03544,gene-KI387_015225
GO:0016514	SWI/SNF complex	cellular_component	0.3471	1	1	2561	3	24160	gene-KI387_013081
GO:0098813	nuclear chromosome segregation	biological_process	0.34919	1	11	2561	92	24160	Novel00672,gene-KI387_023267,gene-KI387_007380,gene-KI387_007245,gene-KI387_036893,gene-KI387_003006,Novel00295,gene-KI387_011930,gene-KI387_010870,gene-KI387_035426,gene-KI387_002709
GO:0061025	membrane fusion	biological_process	0.34963	1	5	2561	37	24160	gene-KI387_037588,gene-KI387_035402,gene-KI387_036274,gene-KI387_001899,gene-KI387_006186
GO:0000315	organellar large ribosomal subunit	cellular_component	0.3502	1	1	2561	4	24160	gene-KI387_032632
GO:0005762	mitochondrial large ribosomal subunit	cellular_component	0.3502	1	1	2561	4	24160	gene-KI387_032632
GO:0098796	membrane protein complex	cellular_component	0.3506	1	85	2561	738	24160	Novel07044,gene-KI387_004620,gene-KI387_038848,gene-KI387_010752,gene-KI387_023862,gene-KI387_002736,gene-KI387_002742,gene-KI387_032850,Novel05783,gene-KI387_007472,gene-KI387_024485,gene-KI387_018567,gene-KI387_008350,gene-KI387_034693,gene-KI387_025413,gene-KI387_028802,gene-KI387_001899,Novel00407,Novel07069,gene-KI387_024718,gene-KI387_030918,gene-KI387_008667,gene-KI387_018689,gene-KI387_02…
GO:0019835	cytolysis	biological_process	0.35107	1	6	2561	45	24160	gene-KI387_001400,gene-KI387_002400,Novel02869,Novel01765,gene-KI387_018062,Novel00510
GO:0004814	arginine-tRNA ligase activity	molecular_function	0.35277	1	1	2561	4	24160	Novel00496
GO:0006420	arginyl-tRNA aminoacylation	biological_process	0.35277	1	1	2561	4	24160	Novel00496
GO:0009606	tropism	biological_process	0.35291	1	1	2561	3	24160	Novel00783
GO:0010274	hydrotropism	biological_process	0.35291	1	1	2561	3	24160	Novel00783
GO:0001671	ATPase activator activity	molecular_function	0.3536	1	1	2561	5	24160	gene-KI387_018510
GO:0048468	cell development	biological_process	0.35413	1	6	2561	46	24160	Novel06191,gene-KI387_031230,gene-KI387_016967,gene-KI387_035742,gene-KI387_028341,gene-KI387_016369
GO:0044232	organelle membrane contact site	cellular_component	0.35479	1	2	2561	10	24160	Novel05424,gene-KI387_025599
GO:0015385	sodium:proton antiporter activity	molecular_function	0.35604	1	1	2561	3	24160	gene-KI387_015139
GO:0051139	metal ion:proton antiporter activity	molecular_function	0.35604	1	1	2561	3	24160	gene-KI387_015139
GO:0002532	production of molecular mediator involved in inflammatory response	biological_process	0.35629	1	1	2561	3	24160	gene-KI387_005794
GO:0004896	cytokine receptor activity	molecular_function	0.35629	1	1	2561	3	24160	gene-KI387_005794
GO:0036126	sperm flagellum	cellular_component	0.35629	1	1	2561	3	24160	gene-KI387_001899
GO:0097228	sperm principal piece	cellular_component	0.35629	1	1	2561	3	24160	gene-KI387_001899
GO:0097729	9+2 motile cilium	cellular_component	0.35629	1	1	2561	3	24160	gene-KI387_001899
GO:0140375	immune receptor activity	molecular_function	0.35629	1	1	2561	3	24160	gene-KI387_005794
GO:0030193	regulation of blood coagulation	biological_process	0.3565	1	1	2561	4	24160	gene-KI387_016721
GO:0050818	regulation of coagulation	biological_process	0.3565	1	1	2561	4	24160	gene-KI387_016721
GO:0061041	regulation of wound healing	biological_process	0.3565	1	1	2561	4	24160	gene-KI387_016721
GO:1900046	regulation of hemostasis	biological_process	0.3565	1	1	2561	4	24160	gene-KI387_016721
GO:1903034	regulation of response to wounding	biological_process	0.3565	1	1	2561	4	24160	gene-KI387_016721
GO:0005739	mitochondrion	cellular_component	0.3567	1	39	2561	343	24160	gene-KI387_026883,gene-KI387_036235,gene-KI387_014772,gene-KI387_026485,gene-KI387_033732,Novel03051,Novel05424,gene-KI387_024718,Novel07069,Novel04667,Novel00912,gene-KI387_023268,gene-KI387_044328,gene-KI387_018129,gene-KI387_025064,gene-KI387_030933,gene-KI387_019016,gene-KI387_030923,gene-KI387_005211,gene-KI387_002742,gene-KI387_002736,Novel03495,gene-KI387_018241,gene-KI387_010752,gene-KI38…
GO:0019082	viral protein processing	biological_process	0.3567	1	3	2561	22	24160	gene-KI387_021941,gene-KI387_039023,gene-KI387_021939
GO:0006807	nitrogen compound metabolic process	biological_process	0.35809	1	853	2561	7717	24160	gene-KI387_031983,gene-KI387_038848,gene-KI387_011327,gene-KI387_014162,gene-KI387_034370,gene-KI387_043984,gene-KI387_032152,Novel01064,gene-KI387_038865,gene-KI387_035423,gene-KI387_026320,gene-KI387_014525,gene-KI387_029444,gene-KI387_019247,Novel03099,gene-KI387_018974,Novel01219,gene-KI387_010311,gene-KI387_039308,gene-KI387_012777,gene-KI387_007687,gene-KI387_024149,gene-KI387_010001,gene-K…
GO:0000377	RNA splicing, via transesterification reactions with bulged adenosine as nucleophile	biological_process	0.35905	1	7	2561	55	24160	gene-KI387_006674,gene-KI387_013505,gene-KI387_027918,gene-KI387_026888,gene-KI387_026449,gene-KI387_023612,gene-KI387_018275
GO:0000398	mRNA splicing, via spliceosome	biological_process	0.35905	1	7	2561	55	24160	gene-KI387_023612,gene-KI387_018275,gene-KI387_026449,gene-KI387_026888,gene-KI387_006674,gene-KI387_013505,gene-KI387_027918
GO:0009403	toxin biosynthetic process	biological_process	0.35933	1	2	2561	12	24160	gene-KI387_003726,Novel02052
GO:0015318	inorganic molecular entity transmembrane transporter activity	molecular_function	0.36113	1	88	2561	754	24160	gene-KI387_009504,gene-KI387_034485,gene-KI387_024099,gene-KI387_038848,gene-KI387_007137,Novel07017,gene-KI387_034613,Novel02854,gene-KI387_014600,gene-KI387_032152,gene-KI387_027972,gene-KI387_018627,gene-KI387_015139,Novel02744,gene-KI387_029338,gene-KI387_032443,gene-KI387_005377,gene-KI387_039308,gene-KI387_009627,Novel05085,Novel00407,gene-KI387_007805,gene-KI387_002162,gene-KI387_018341,ge…
GO:0004623	phospholipase A2 activity	molecular_function	0.3613	1	1	2561	5	24160	gene-KI387_028454
GO:0015908	fatty acid transport	biological_process	0.3613	1	1	2561	5	24160	gene-KI387_028454
GO:0015909	long-chain fatty acid transport	biological_process	0.3613	1	1	2561	5	24160	gene-KI387_028454
GO:0032309	icosanoid secretion	biological_process	0.3613	1	1	2561	5	24160	gene-KI387_028454
GO:0050482	arachidonic acid secretion	biological_process	0.3613	1	1	2561	5	24160	gene-KI387_028454
GO:0071715	icosanoid transport	biological_process	0.3613	1	1	2561	5	24160	gene-KI387_028454
GO:1901571	fatty acid derivative transport	biological_process	0.3613	1	1	2561	5	24160	gene-KI387_028454
GO:1903963	arachidonate transport	biological_process	0.3613	1	1	2561	5	24160	gene-KI387_028454
GO:0001765	membrane raft assembly	biological_process	0.36168	1	1	2561	4	24160	gene-KI387_026264
GO:0031579	membrane raft organization	biological_process	0.36168	1	1	2561	4	24160	gene-KI387_026264
GO:0044091	membrane biogenesis	biological_process	0.36168	1	1	2561	4	24160	gene-KI387_026264
GO:0044854	plasma membrane raft assembly	biological_process	0.36168	1	1	2561	4	24160	gene-KI387_026264
GO:0044857	plasma membrane raft organization	biological_process	0.36168	1	1	2561	4	24160	gene-KI387_026264
GO:0070836	caveola assembly	biological_process	0.36168	1	1	2561	4	24160	gene-KI387_026264
GO:0071709	membrane assembly	biological_process	0.36168	1	1	2561	4	24160	gene-KI387_026264
GO:0042721	TIM22 mitochondrial import inner membrane insertion complex	cellular_component	0.362	1	1	2561	4	24160	gene-KI387_030547
GO:0000280	nuclear division	biological_process	0.36208	1	8	2561	61	24160	gene-KI387_002709,gene-KI387_011930,gene-KI387_025538,gene-KI387_003006,Novel00295,gene-KI387_023267,Novel00672,Novel01237
GO:0072527	pyrimidine-containing compound metabolic process	biological_process	0.36217	1	5	2561	34	24160	gene-KI387_030823,gene-KI387_014162,gene-KI387_002853,gene-KI387_024769,gene-KI387_025073
GO:0034357	photosynthetic membrane	cellular_component	0.36252	1	17	2561	136	24160	gene-KI387_037434,Novel00843,Novel01102,gene-KI387_029490,gene-KI387_018567,gene-KI387_025413,gene-KI387_028802,gene-KI387_005309,gene-KI387_017324,Novel00947,gene-KI387_023155,gene-KI387_004620,Novel07116,gene-KI387_018785,gene-KI387_021633,gene-KI387_029489,gene-KI387_032850
GO:0016701	oxidoreductase activity, acting on single donors with incorporation of molecular oxygen	molecular_function	0.36282	1	19	2561	174	24160	gene-KI387_031129,gene-KI387_013454,gene-KI387_011785,gene-KI387_013537,gene-KI387_019526,Novel05915,gene-KI387_000255,gene-KI387_030330,gene-KI387_031130,gene-KI387_000339,gene-KI387_007094,gene-KI387_005436,gene-KI387_000079,gene-KI387_011792,gene-KI387_031172,gene-KI387_001615,gene-KI387_031855,Novel01219,gene-KI387_019429
GO:0005245	voltage-gated calcium channel activity	molecular_function	0.36286	1	1	2561	4	24160	Novel03809
GO:0016671	oxidoreductase activity, acting on a sulfur group of donors, disulfide as acceptor	molecular_function	0.3633	1	2	2561	15	24160	gene-KI387_035574,gene-KI387_011850
GO:0005186	pheromone activity	molecular_function	0.36416	1	3	2561	18	24160	gene-KI387_024079,gene-KI387_037340,gene-KI387_024898
GO:0005217	intracellular ligand-gated ion channel activity	molecular_function	0.3642	1	4	2561	29	24160	gene-KI387_033235,Novel03745,Novel01687,gene-KI387_021973
GO:0005219	ryanodine-sensitive calcium-release channel activity	molecular_function	0.3642	1	4	2561	29	24160	Novel03745,gene-KI387_033235,gene-KI387_021973,Novel01687
GO:0015278	calcium-release channel activity	molecular_function	0.3642	1	4	2561	29	24160	Novel01687,gene-KI387_021973,Novel03745,gene-KI387_033235
GO:0099094	ligand-gated cation channel activity	molecular_function	0.3642	1	4	2561	29	24160	Novel03745,gene-KI387_033235,gene-KI387_021973,Novel01687
GO:0099604	ligand-gated calcium channel activity	molecular_function	0.3642	1	4	2561	29	24160	gene-KI387_033235,Novel03745,gene-KI387_021973,Novel01687
GO:0006869	lipid transport	biological_process	0.36481	1	9	2561	77	24160	gene-KI387_009716,Novel00649,gene-KI387_021451,gene-KI387_037409,gene-KI387_026659,gene-KI387_026064,gene-KI387_000475,gene-KI387_028454,Novel01054
GO:0035737	injection of substance in to other organism	biological_process	0.3661	1	2	2561	10	24160	gene-KI387_004584,gene-KI387_032427
GO:0035738	envenomation resulting in modulation of process in other organism	biological_process	0.3661	1	2	2561	10	24160	gene-KI387_004584,gene-KI387_032427
GO:0044559	envenomation resulting in modulation of voltage-gated potassium channel activity in other organism	biological_process	0.3661	1	2	2561	10	24160	gene-KI387_004584,gene-KI387_032427
GO:0044560	envenomation resulting in modulation of ion channel activity in other organism	biological_process	0.3661	1	2	2561	10	24160	gene-KI387_004584,gene-KI387_032427
GO:0044562	envenomation resulting in negative regulation of voltage-gated potassium channel activity in other organism	biological_process	0.3661	1	2	2561	10	24160	gene-KI387_004584,gene-KI387_032427
GO:0044564	envenomation resulting in occlusion of the pore of voltage-gated potassium channel in other organism	biological_process	0.3661	1	2	2561	10	24160	gene-KI387_004584,gene-KI387_032427
GO:0070569	uridylyltransferase activity	molecular_function	0.36628	1	2	2561	12	24160	gene-KI387_035538,gene-KI387_037190
GO:0042802	identical protein binding	molecular_function	0.36703	1	13	2561	106	24160	gene-KI387_000711,gene-KI387_023267,gene-KI387_037606,Novel05555,Novel05168,gene-KI387_036306,gene-KI387_026082,gene-KI387_042781,gene-KI387_022201,gene-KI387_008668,gene-KI387_037271,gene-KI387_023268,gene-KI387_002835
GO:0019033	viral tegument	cellular_component	0.36738	1	1	2561	4	24160	gene-KI387_018251
GO:0006721	terpenoid metabolic process	biological_process	0.36782	1	3	2561	18	24160	gene-KI387_004306,gene-KI387_034266,gene-KI387_039159
GO:0016114	terpenoid biosynthetic process	biological_process	0.36782	1	3	2561	18	24160	gene-KI387_039159,gene-KI387_034266,gene-KI387_004306
GO:0019901	protein kinase binding	molecular_function	0.36895	1	5	2561	43	24160	gene-KI387_028017,Novel00380,gene-KI387_037271,gene-KI387_023268,Novel02869
GO:0030420	establishment of competence for transformation	biological_process	0.37017	1	1	2561	4	24160	gene-KI387_000885
GO:0006817	phosphate ion transport	biological_process	0.37221	1	2	2561	13	24160	gene-KI387_037885,gene-KI387_032173
GO:0009295	nucleoid	cellular_component	0.373	1	1	2561	4	24160	gene-KI387_039694
GO:0098805	whole membrane	cellular_component	0.37356	1	26	2561	218	24160	gene-KI387_018241,gene-KI387_029292,gene-KI387_036235,gene-KI387_002736,Novel05199,gene-KI387_035419,gene-KI387_002742,Novel05551,Novel05424,gene-KI387_018689,gene-KI387_038848,gene-KI387_018129,gene-KI387_021501,gene-KI387_016777,gene-KI387_044328,gene-KI387_023268,gene-KI387_033647,gene-KI387_018046,gene-KI387_011006,gene-KI387_012216,Novel03630,gene-KI387_025599,Novel03171,Novel01818,gene-KI38…
GO:0015937	coenzyme A biosynthetic process	biological_process	0.37418	1	2	2561	13	24160	gene-KI387_038959,gene-KI387_028236
GO:0033866	nucleoside bisphosphate biosynthetic process	biological_process	0.37418	1	2	2561	13	24160	gene-KI387_038959,gene-KI387_028236
GO:0034030	ribonucleoside bisphosphate biosynthetic process	biological_process	0.37418	1	2	2561	13	24160	gene-KI387_038959,gene-KI387_028236
GO:0034033	purine nucleoside bisphosphate biosynthetic process	biological_process	0.37418	1	2	2561	13	24160	gene-KI387_038959,gene-KI387_028236
GO:0008897	holo-[acyl-carrier-protein] synthase activity	molecular_function	0.37612	1	1	2561	4	24160	gene-KI387_035521
GO:0008200	ion channel inhibitor activity	molecular_function	0.37759	1	8	2561	63	24160	gene-KI387_005757,gene-KI387_007886,gene-KI387_022917,gene-KI387_038090,gene-KI387_024079,Novel01235,gene-KI387_020071,gene-KI387_030823
GO:0016248	channel inhibitor activity	molecular_function	0.37759	1	8	2561	63	24160	gene-KI387_020071,gene-KI387_030823,gene-KI387_038090,gene-KI387_024079,Novel01235,gene-KI387_005757,gene-KI387_007886,gene-KI387_022917
GO:0004427	inorganic diphosphatase activity	molecular_function	0.37831	1	6	2561	48	24160	gene-KI387_020615,gene-KI387_010262,gene-KI387_039308,gene-KI387_033209,gene-KI387_043176,gene-KI387_006587
GO:0005795	Golgi stack	cellular_component	0.37939	1	1	2561	4	24160	Novel03544
GO:0019087	transformation of host cell by virus	biological_process	0.37984	1	3	2561	19	24160	Novel03955,gene-KI387_006093,gene-KI387_004095
GO:0019184	nonribosomal peptide biosynthetic process	biological_process	0.38121	1	3	2561	20	24160	gene-KI387_033152,gene-KI387_003140,gene-KI387_031734
GO:0005773	vacuole	cellular_component	0.38276	1	7	2561	50	24160	gene-KI387_005156,gene-KI387_018689,Novel05551,gene-KI387_035419,gene-KI387_038848,Novel01818,gene-KI387_021501
GO:0019385	methanogenesis, from acetate	biological_process	0.38395	1	1	2561	4	24160	Novel00184
GO:0008239	dipeptidyl-peptidase activity	molecular_function	0.3843	1	2	2561	11	24160	gene-KI387_001390,gene-KI387_039023
GO:0006325	chromatin organization	biological_process	0.38473	1	24	2561	207	24160	gene-KI387_004643,gene-KI387_000711,Novel00971,gene-KI387_014730,gene-KI387_018715,gene-KI387_012576,gene-KI387_028917,Novel03875,gene-KI387_006537,gene-KI387_004268,gene-KI387_010589,gene-KI387_035814,Novel01396,gene-KI387_000953,gene-KI387_024168,gene-KI387_000955,Novel00970,Novel00871,gene-KI387_005264,gene-KI387_039024,Novel01085,gene-KI387_010447,gene-KI387_010807,gene-KI387_013081
GO:0071900	regulation of protein serine/threonine kinase activity	biological_process	0.38509	1	3	2561	20	24160	gene-KI387_034734,Novel00380,Novel02869
GO:0009913	epidermal cell differentiation	biological_process	0.38569	1	1	2561	4	24160	Novel06191
GO:0030216	keratinocyte differentiation	biological_process	0.38569	1	1	2561	4	24160	Novel06191
GO:0043588	skin development	biological_process	0.38569	1	1	2561	4	24160	Novel06191
GO:0005262	calcium channel activity	molecular_function	0.38585	1	5	2561	39	24160	gene-KI387_033235,Novel03745,Novel01687,Novel03809,gene-KI387_021973
GO:0016833	oxo-acid-lyase activity	molecular_function	0.38649	1	2	2561	11	24160	gene-KI387_013662,gene-KI387_034213
GO:0000221	vacuolar proton-transporting V-type ATPase, V1 domain	cellular_component	0.38839	1	6	2561	40	24160	gene-KI387_035419,Novel05551,gene-KI387_018689,gene-KI387_038848,Novel01818,gene-KI387_021501
GO:0019321	pentose metabolic process	biological_process	0.38891	1	1	2561	4	24160	Novel06053
GO:0019566	arabinose metabolic process	biological_process	0.38891	1	1	2561	4	24160	Novel06053
GO:0046373	L-arabinose metabolic process	biological_process	0.38891	1	1	2561	4	24160	Novel06053
GO:0016774	phosphotransferase activity, carboxyl group as acceptor	molecular_function	0.38944	1	2	2561	12	24160	gene-KI387_017946,gene-KI387_031072
GO:0006865	amino acid transport	biological_process	0.38964	1	5	2561	34	24160	gene-KI387_039007,gene-KI387_034755,gene-KI387_018341,Novel02921,gene-KI387_012659
GO:0098588	bounding membrane of organelle	cellular_component	0.38987	1	34	2561	293	24160	gene-KI387_018241,gene-KI387_002742,Novel05551,gene-KI387_002736,gene-KI387_028330,gene-KI387_038848,gene-KI387_016777,gene-KI387_033647,gene-KI387_023267,gene-KI387_002738,gene-KI387_012288,Novel01818,Novel03171,gene-KI387_025599,Novel03630,gene-KI387_036235,gene-KI387_029292,Novel03154,gene-KI387_035419,Novel05199,Novel05424,gene-KI387_018689,gene-KI387_009130,gene-KI387_013507,gene-KI387_04432…
GO:0045121	membrane raft	cellular_component	0.39218	1	1	2561	4	24160	gene-KI387_018046
GO:0098589	membrane region	cellular_component	0.39218	1	1	2561	4	24160	gene-KI387_018046
GO:0098857	membrane microdomain	cellular_component	0.39218	1	1	2561	4	24160	gene-KI387_018046
GO:0005891	voltage-gated calcium channel complex	cellular_component	0.39334	1	2	2561	11	24160	Novel03809,gene-KI387_001899
GO:0009579	thylakoid	cellular_component	0.39379	1	20	2561	164	24160	gene-KI387_021633,gene-KI387_018785,Novel07116,gene-KI387_032850,gene-KI387_029489,gene-KI387_025395,Novel00947,gene-KI387_017324,gene-KI387_004620,gene-KI387_023155,gene-KI387_025413,gene-KI387_018567,Novel01102,gene-KI387_029490,gene-KI387_005309,gene-KI387_028802,Novel04609,Novel00843,gene-KI387_001249,gene-KI387_037434
GO:0042302	structural constituent of cuticle	molecular_function	0.39407	1	2	2561	14	24160	gene-KI387_027919,Novel02490
GO:0044599	AP-5 adaptor complex	cellular_component	0.39429	1	1	2561	4	24160	gene-KI387_008667
GO:0007030	Golgi organization	biological_process	0.39493	1	3	2561	23	24160	gene-KI387_023267,gene-KI387_023268,Novel03376
GO:0030430	host cell cytoplasm	cellular_component	0.3954	1	2	2561	12	24160	gene-KI387_029292,gene-KI387_038090
GO:0043539	protein serine/threonine kinase activator activity	molecular_function	0.39821	1	1	2561	4	24160	gene-KI387_011666
GO:0034702	ion channel complex	cellular_component	0.40389	1	3	2561	20	24160	gene-KI387_030918,gene-KI387_001899,Novel03809
GO:0033014	tetrapyrrole biosynthetic process	biological_process	0.40445	1	12	2561	103	24160	gene-KI387_011705,gene-KI387_034742,gene-KI387_037212,gene-KI387_030750,Novel05750,gene-KI387_033741,gene-KI387_031026,gene-KI387_026259,gene-KI387_022362,gene-KI387_036227,gene-KI387_011587,gene-KI387_027652
GO:0004511	tyrosine 3-monooxygenase activity	molecular_function	0.40641	1	2	2561	13	24160	gene-KI387_016280,gene-KI387_008594
GO:0007224	smoothened signaling pathway	biological_process	0.40743	1	4	2561	28	24160	gene-KI387_001882,gene-KI387_026442,gene-KI387_031238,Novel05658
GO:0004616	phosphogluconate dehydrogenase (decarboxylating) activity	molecular_function	0.4084	1	1	2561	5	24160	gene-KI387_036098
GO:0042030	ATPase inhibitor activity	molecular_function	0.40906	1	2	2561	15	24160	Novel02032,gene-KI387_008480
GO:0046422	violaxanthin de-epoxidase activity	molecular_function	0.41208	1	1	2561	4	24160	gene-KI387_016046
GO:0042834	peptidoglycan binding	molecular_function	0.41275	1	1	2561	6	24160	Novel01491
GO:0044769	ATPase activity, coupled to transmembrane movement of ions, rotational mechanism	molecular_function	0.41364	1	4	2561	26	24160	gene-KI387_021501,Novel01818,gene-KI387_018689,gene-KI387_038848
GO:0046961	proton-transporting ATPase activity, rotational mechanism	molecular_function	0.41364	1	4	2561	26	24160	gene-KI387_038848,gene-KI387_018689,Novel01818,gene-KI387_021501
GO:0016426	tRNA (adenine) methyltransferase activity	molecular_function	0.41421	1	2	2561	13	24160	gene-KI387_011450,gene-KI387_027813
GO:0016429	tRNA (adenine-N1-)-methyltransferase activity	molecular_function	0.41421	1	2	2561	13	24160	gene-KI387_027813,gene-KI387_011450
GO:0098803	respiratory chain complex	cellular_component	0.41486	1	4	2561	30	24160	Novel04667,gene-KI387_007472,gene-KI387_008350,Novel07044
GO:0009617	response to bacterium	biological_process	0.41518	1	8	2561	72	24160	gene-KI387_006747,Novel01110,gene-KI387_001400,gene-KI387_033055,gene-KI387_020629,gene-KI387_024614,gene-KI387_032175,gene-KI387_002400
GO:0042742	defense response to bacterium	biological_process	0.41518	1	8	2561	72	24160	gene-KI387_002400,Novel01110,gene-KI387_001400,gene-KI387_006747,gene-KI387_024614,gene-KI387_032175,gene-KI387_033055,gene-KI387_020629
GO:0042440	pigment metabolic process	biological_process	0.4153	1	6	2561	42	24160	gene-KI387_035541,gene-KI387_034742,Novel05750,gene-KI387_005263,gene-KI387_036227,gene-KI387_027652
GO:0008199	ferric iron binding	molecular_function	0.41532	1	1	2561	5	24160	Novel06923
GO:0000902	cell morphogenesis	biological_process	0.41542	1	3	2561	22	24160	gene-KI387_028341,gene-KI387_033201,gene-KI387_003367
GO:0071855	neuropeptide receptor binding	molecular_function	0.41633	1	1	2561	5	24160	Novel02869
GO:0016298	lipase activity	molecular_function	0.41647	1	3	2561	21	24160	gene-KI387_037433,gene-KI387_012084,gene-KI387_028454
GO:0000813	ESCRT I complex	cellular_component	0.41723	1	1	2561	4	24160	Novel05199
GO:0008686	3,4-dihydroxy-2-butanone-4-phosphate synthase activity	molecular_function	0.41734	1	1	2561	5	24160	gene-KI387_006788
GO:0016878	acid-thiol ligase activity	molecular_function	0.41812	1	1	2561	5	24160	gene-KI387_009414
GO:1904949	ATPase complex	cellular_component	0.41818	1	2	2561	12	24160	gene-KI387_013081,Novel07451
GO:0004016	adenylate cyclase activity	molecular_function	0.41853	1	1	2561	6	24160	Novel05887
GO:0006171	cAMP biosynthetic process	biological_process	0.41853	1	1	2561	6	24160	Novel05887
GO:0000186	activation of MAPKK activity	biological_process	0.41903	1	1	2561	4	24160	gene-KI387_034734
GO:0008343	adult feeding behavior	biological_process	0.41903	1	1	2561	4	24160	gene-KI387_034734
GO:0030534	adult behavior	biological_process	0.41903	1	1	2561	4	24160	gene-KI387_034734
GO:0032094	response to food	biological_process	0.41903	1	1	2561	4	24160	gene-KI387_034734
GO:0032095	regulation of response to food	biological_process	0.41903	1	1	2561	4	24160	gene-KI387_034734
GO:0032096	negative regulation of response to food	biological_process	0.41903	1	1	2561	4	24160	gene-KI387_034734
GO:0032098	regulation of appetite	biological_process	0.41903	1	1	2561	4	24160	gene-KI387_034734
GO:0032099	negative regulation of appetite	biological_process	0.41903	1	1	2561	4	24160	gene-KI387_034734
GO:0032102	negative regulation of response to external stimulus	biological_process	0.41903	1	1	2561	4	24160	gene-KI387_034734
GO:0032104	regulation of response to extracellular stimulus	biological_process	0.41903	1	1	2561	4	24160	gene-KI387_034734
GO:0032105	negative regulation of response to extracellular stimulus	biological_process	0.41903	1	1	2561	4	24160	gene-KI387_034734
GO:0032107	regulation of response to nutrient levels	biological_process	0.41903	1	1	2561	4	24160	gene-KI387_034734
GO:0032108	negative regulation of response to nutrient levels	biological_process	0.41903	1	1	2561	4	24160	gene-KI387_034734
GO:0032147	activation of protein kinase activity	biological_process	0.41903	1	1	2561	4	24160	gene-KI387_034734
GO:0033674	positive regulation of kinase activity	biological_process	0.41903	1	1	2561	4	24160	gene-KI387_034734
GO:0043405	regulation of MAP kinase activity	biological_process	0.41903	1	1	2561	4	24160	gene-KI387_034734
GO:0043406	positive regulation of MAP kinase activity	biological_process	0.41903	1	1	2561	4	24160	gene-KI387_034734
GO:0045860	positive regulation of protein kinase activity	biological_process	0.41903	1	1	2561	4	24160	gene-KI387_034734
GO:0051347	positive regulation of transferase activity	biological_process	0.41903	1	1	2561	4	24160	gene-KI387_034734
GO:0071902	positive regulation of protein serine/threonine kinase activity	biological_process	0.41903	1	1	2561	4	24160	gene-KI387_034734
GO:0004555	alpha,alpha-trehalase activity	molecular_function	0.42124	1	1	2561	4	24160	gene-KI387_020429
GO:0015927	trehalase activity	molecular_function	0.42124	1	1	2561	4	24160	gene-KI387_020429
GO:0016471	vacuolar proton-transporting V-type ATPase complex	cellular_component	0.4214	1	6	2561	43	24160	Novel05551,gene-KI387_038848,gene-KI387_018689,gene-KI387_035419,Novel01818,gene-KI387_021501
GO:0005753	mitochondrial proton-transporting ATP synthase complex	cellular_component	0.42251	1	7	2561	56	24160	gene-KI387_019016,Novel07069,gene-KI387_014772,gene-KI387_034894,gene-KI387_025064,Novel00407,gene-KI387_035280
GO:0051382	kinetochore assembly	biological_process	0.42279	1	6	2561	51	24160	Novel01918,gene-KI387_023267,gene-KI387_037606,gene-KI387_040307,Novel05264,gene-KI387_037271
GO:0051383	kinetochore organization	biological_process	0.42279	1	6	2561	51	24160	Novel01918,gene-KI387_037606,gene-KI387_023267,Novel05264,gene-KI387_040307,gene-KI387_037271
GO:0007623	circadian rhythm	biological_process	0.42499	1	2	2561	15	24160	gene-KI387_041058,gene-KI387_032427
GO:0008839	4-hydroxy-tetrahydrodipicolinate reductase	molecular_function	0.42514	1	3	2561	27	24160	gene-KI387_011705,gene-KI387_021590,gene-KI387_036183
GO:0018580	nitronate monooxygenase activity	molecular_function	0.42552	1	2	2561	12	24160	Novel01219,gene-KI387_031855
GO:0009262	deoxyribonucleotide metabolic process	biological_process	0.42584	1	1	2561	6	24160	gene-KI387_002048
GO:0007091	metaphase/anaphase transition of mitotic cell cycle	biological_process	0.42828	1	2	2561	14	24160	gene-KI387_023267,gene-KI387_011930
GO:0010965	regulation of mitotic sister chromatid separation	biological_process	0.42828	1	2	2561	14	24160	gene-KI387_023267,gene-KI387_011930
GO:0030071	regulation of mitotic metaphase/anaphase transition	biological_process	0.42828	1	2	2561	14	24160	gene-KI387_023267,gene-KI387_011930
GO:0033045	regulation of sister chromatid segregation	biological_process	0.42828	1	2	2561	14	24160	gene-KI387_011930,gene-KI387_023267
GO:0033047	regulation of mitotic sister chromatid segregation	biological_process	0.42828	1	2	2561	14	24160	gene-KI387_023267,gene-KI387_011930
GO:0044784	metaphase/anaphase transition of cell cycle	biological_process	0.42828	1	2	2561	14	24160	gene-KI387_011930,gene-KI387_023267
GO:0051306	mitotic sister chromatid separation	biological_process	0.42828	1	2	2561	14	24160	gene-KI387_023267,gene-KI387_011930
GO:0051983	regulation of chromosome segregation	biological_process	0.42828	1	2	2561	14	24160	gene-KI387_023267,gene-KI387_011930
GO:1902099	regulation of metaphase/anaphase transition of cell cycle	biological_process	0.42828	1	2	2561	14	24160	gene-KI387_011930,gene-KI387_023267
GO:1905818	regulation of chromosome separation	biological_process	0.42828	1	2	2561	14	24160	gene-KI387_011930,gene-KI387_023267
GO:0044391	ribosomal subunit	cellular_component	0.42996	1	2	2561	16	24160	gene-KI387_032632,gene-KI387_030933
GO:0004334	fumarylacetoacetase activity	molecular_function	0.43022	1	1	2561	4	24160	gene-KI387_030923
GO:0016822	hydrolase activity, acting on acid carbon-carbon bonds	molecular_function	0.43022	1	1	2561	4	24160	gene-KI387_030923
GO:0016823	hydrolase activity, acting on acid carbon-carbon bonds, in ketonic substances	molecular_function	0.43022	1	1	2561	4	24160	gene-KI387_030923
GO:0004356	glutamate-ammonia ligase activity	molecular_function	0.43034	1	2	2561	13	24160	gene-KI387_015468,gene-KI387_037286
GO:0016703	oxidoreductase activity, acting on single donors with incorporation of molecular oxygen, incorporation of one atom of oxygen (internal monooxygenases or internal mixed function oxidases)	molecular_function	0.43055	1	3	2561	19	24160	gene-KI387_031855,gene-KI387_000255,Novel01219
GO:0004367	glycerol-3-phosphate dehydrogenase [NAD+] activity	molecular_function	0.43071	1	1	2561	4	24160	gene-KI387_030645
GO:0047952	glycerol-3-phosphate dehydrogenase [NAD(P)+] activity	molecular_function	0.43071	1	1	2561	4	24160	gene-KI387_030645
GO:0006099	tricarboxylic acid cycle	biological_process	0.43212	1	3	2561	18	24160	gene-KI387_005815,gene-KI387_038848,gene-KI387_015818
GO:0016586	RSC-type complex	cellular_component	0.43239	1	1	2561	4	24160	gene-KI387_013081
GO:0015085	calcium ion transmembrane transporter activity	molecular_function	0.43265	1	5	2561	41	24160	Novel03745,gene-KI387_033235,gene-KI387_021973,Novel03809,Novel01687
GO:0005785	signal recognition particle receptor complex	cellular_component	0.43266	1	1	2561	5	24160	gene-KI387_028330
GO:0046915	transition metal ion transmembrane transporter activity	molecular_function	0.43327	1	6	2561	46	24160	gene-KI387_034734,Novel01113,Novel00336,gene-KI387_014584,gene-KI387_002162,gene-KI387_030057
GO:0008537	proteasome activator complex	cellular_component	0.43397	1	1	2561	5	24160	gene-KI387_027425
GO:0000255	allantoin metabolic process	biological_process	0.43429	1	1	2561	4	24160	Novel04874
GO:0000256	allantoin catabolic process	biological_process	0.43429	1	1	2561	4	24160	Novel04874
GO:0006415	translational termination	biological_process	0.43451	1	3	2561	23	24160	gene-KI387_028567,gene-KI387_028564,gene-KI387_036196
GO:0042651	thylakoid membrane	cellular_component	0.43504	1	4	2561	32	24160	gene-KI387_028802,gene-KI387_004620,gene-KI387_037434,gene-KI387_017324
GO:0006626	protein targeting to mitochondrion	biological_process	0.43517	1	3	2561	20	24160	Novel03171,gene-KI387_026485,gene-KI387_036235
GO:0030150	protein import into mitochondrial matrix	biological_process	0.43517	1	3	2561	20	24160	gene-KI387_036235,gene-KI387_026485,Novel03171
GO:0004506	squalene monooxygenase activity	molecular_function	0.43569	1	3	2561	19	24160	Novel06134,gene-KI387_035360,gene-KI387_022917
GO:0008641	ubiquitin-like modifier activating enzyme activity	molecular_function	0.43688	1	4	2561	27	24160	gene-KI387_011705,gene-KI387_003087,gene-KI387_026259,gene-KI387_014285
GO:0031225	anchored component of membrane	cellular_component	0.43781	1	2	2561	13	24160	gene-KI387_029812,gene-KI387_025599
GO:0005451	monovalent cation:proton antiporter activity	molecular_function	0.43822	1	1	2561	4	24160	gene-KI387_015139
GO:0015491	cation:cation antiporter activity	molecular_function	0.43822	1	1	2561	4	24160	gene-KI387_015139
GO:0072341	modified amino acid binding	molecular_function	0.43852	1	1	2561	4	24160	gene-KI387_022425
GO:0032543	mitochondrial translation	biological_process	0.43877	1	1	2561	5	24160	gene-KI387_032632
GO:0140053	mitochondrial gene expression	biological_process	0.43877	1	1	2561	5	24160	gene-KI387_032632
GO:0005548	phospholipid transporter activity	molecular_function	0.43955	1	1	2561	7	24160	gene-KI387_026064
GO:0015914	phospholipid transport	biological_process	0.43955	1	1	2561	7	24160	gene-KI387_026064
GO:0004019	adenylosuccinate synthase activity	molecular_function	0.4397	1	1	2561	4	24160	gene-KI387_013763
GO:0007283	spermatogenesis	biological_process	0.44039	1	4	2561	34	24160	gene-KI387_004765,gene-KI387_016967,Novel00295,Novel00672
GO:0048232	male gamete generation	biological_process	0.44039	1	4	2561	34	24160	Novel00672,gene-KI387_004765,gene-KI387_016967,Novel00295
GO:0008915	lipid-A-disaccharide synthase activity	molecular_function	0.44066	1	2	2561	13	24160	Novel01099,Novel06818
GO:0043624	cellular protein complex disassembly	biological_process	0.44175	1	4	2561	33	24160	gene-KI387_028567,gene-KI387_028564,gene-KI387_036196,gene-KI387_001057
GO:0005347	ATP transmembrane transporter activity	molecular_function	0.44271	1	1	2561	4	24160	gene-KI387_030438
GO:0005471	ATP:ADP antiporter activity	molecular_function	0.44271	1	1	2561	4	24160	gene-KI387_030438
GO:0006862	nucleotide transport	biological_process	0.44271	1	1	2561	4	24160	gene-KI387_030438
GO:0015217	ADP transmembrane transporter activity	molecular_function	0.44271	1	1	2561	4	24160	gene-KI387_030438
GO:0015301	anion:anion antiporter activity	molecular_function	0.44271	1	1	2561	4	24160	gene-KI387_030438
GO:0140323	solute:anion antiporter activity	molecular_function	0.44271	1	1	2561	4	24160	gene-KI387_030438
GO:0005791	rough endoplasmic reticulum	cellular_component	0.44334	1	6	2561	50	24160	gene-KI387_015236,Novel06400,gene-KI387_009479,gene-KI387_001692,gene-KI387_023267,gene-KI387_028330
GO:0030867	rough endoplasmic reticulum membrane	cellular_component	0.44334	1	6	2561	50	24160	gene-KI387_001692,gene-KI387_023267,gene-KI387_028330,Novel06400,gene-KI387_015236,gene-KI387_009479
GO:0046556	alpha-L-arabinofuranosidase activity	molecular_function	0.44373	1	1	2561	5	24160	Novel06053
GO:0033926	glycopeptide alpha-N-acetylgalactosaminidase activity	molecular_function	0.44383	1	2	2561	18	24160	gene-KI387_015225,gene-KI387_010587
GO:0000145	exocyst	cellular_component	0.44486	1	7	2561	55	24160	gene-KI387_037271,gene-KI387_029896,gene-KI387_014387,gene-KI387_008667,gene-KI387_034458,gene-KI387_010395,gene-KI387_006619
GO:0030313	cell envelope	cellular_component	0.44533	1	2	2561	13	24160	gene-KI387_028953,Novel03210
GO:0005882	intermediate filament	cellular_component	0.44573	1	3	2561	26	24160	gene-KI387_024647,gene-KI387_017619,gene-KI387_013451
GO:0045111	intermediate filament cytoskeleton	cellular_component	0.44573	1	3	2561	26	24160	gene-KI387_024647,gene-KI387_017619,gene-KI387_013451
GO:0007059	chromosome segregation	biological_process	0.44575	1	13	2561	116	24160	gene-KI387_039694,gene-KI387_002709,gene-KI387_035426,Novel05264,gene-KI387_011930,gene-KI387_010870,Novel00295,gene-KI387_003006,gene-KI387_036893,gene-KI387_007245,gene-KI387_007380,Novel00672,gene-KI387_023267
GO:0016591	RNA polymerase II, holoenzyme	cellular_component	0.44676	1	8	2561	66	24160	gene-KI387_027845,gene-KI387_014284,Novel00871,gene-KI387_005470,gene-KI387_006093,gene-KI387_004985,gene-KI387_038625,gene-KI387_023267
GO:0002682	regulation of immune system process	biological_process	0.44761	1	6	2561	47	24160	Novel06722,gene-KI387_035672,gene-KI387_035673,Novel00871,gene-KI387_034371,gene-KI387_018046
GO:0016597	amino acid binding	molecular_function	0.4479	1	1	2561	6	24160	gene-KI387_022425
GO:0045893	positive regulation of transcription, DNA-templated	biological_process	0.44806	1	7	2561	59	24160	gene-KI387_000263,Novel00136,gene-KI387_019578,gene-KI387_039861,gene-KI387_003664,gene-KI387_021598,gene-KI387_009252
GO:0045935	positive regulation of nucleobase-containing compound metabolic process	biological_process	0.44806	1	7	2561	59	24160	gene-KI387_021598,gene-KI387_009252,gene-KI387_003664,gene-KI387_019578,Novel00136,gene-KI387_039861,gene-KI387_000263
GO:0051254	positive regulation of RNA metabolic process	biological_process	0.44806	1	7	2561	59	24160	Novel00136,gene-KI387_019578,gene-KI387_039861,gene-KI387_000263,gene-KI387_021598,gene-KI387_009252,gene-KI387_003664
GO:1902680	positive regulation of RNA biosynthetic process	biological_process	0.44806	1	7	2561	59	24160	gene-KI387_003664,gene-KI387_009252,gene-KI387_021598,gene-KI387_000263,Novel00136,gene-KI387_019578,gene-KI387_039861
GO:1903508	positive regulation of nucleic acid-templated transcription	biological_process	0.44806	1	7	2561	59	24160	gene-KI387_000263,gene-KI387_039861,Novel00136,gene-KI387_019578,gene-KI387_003664,gene-KI387_009252,gene-KI387_021598
GO:0003873	6-phosphofructo-2-kinase activity	molecular_function	0.45066	1	3	2561	24	24160	gene-KI387_017746,gene-KI387_004546,gene-KI387_020344
GO:0006000	fructose metabolic process	biological_process	0.45066	1	3	2561	24	24160	gene-KI387_004546,gene-KI387_020344,gene-KI387_017746
GO:0019064	fusion of virus membrane with host plasma membrane	biological_process	0.45072	1	3	2561	24	24160	gene-KI387_001899,gene-KI387_037588,gene-KI387_035402
GO:0039663	membrane fusion involved in viral entry into host cell	biological_process	0.45072	1	3	2561	24	24160	gene-KI387_035402,gene-KI387_037588,gene-KI387_001899
GO:0044800	multi-organism membrane fusion	biological_process	0.45072	1	3	2561	24	24160	gene-KI387_001899,gene-KI387_035402,gene-KI387_037588
GO:0044803	multi-organism membrane organization	biological_process	0.45072	1	3	2561	24	24160	gene-KI387_037588,gene-KI387_035402,gene-KI387_001899
GO:0033180	proton-transporting V-type ATPase, V1 domain	cellular_component	0.45175	1	6	2561	43	24160	gene-KI387_035419,Novel05551,gene-KI387_018689,gene-KI387_038848,Novel01818,gene-KI387_021501
GO:0016714	oxidoreductase activity, acting on paired donors, with incorporation or reduction of molecular oxygen, reduced pteridine as one donor, and incorporation of one atom of oxygen	molecular_function	0.45319	1	2	2561	14	24160	gene-KI387_008594,gene-KI387_016280
GO:0008107	galactoside 2-alpha-L-fucosyltransferase activity	molecular_function	0.45331	1	1	2561	5	24160	gene-KI387_038611
GO:0031127	alpha-(1,2)-fucosyltransferase activity	molecular_function	0.45331	1	1	2561	5	24160	gene-KI387_038611
GO:0046992	oxidoreductase activity, acting on X-H and Y-H to form an X-Y bond	molecular_function	0.45383	1	1	2561	7	24160	gene-KI387_002048
GO:0050485	oxidoreductase activity, acting on X-H and Y-H to form an X-Y bond, with a disulfide as acceptor	molecular_function	0.45383	1	1	2561	7	24160	gene-KI387_002048
GO:0009987	cellular process	biological_process	0.45505	1	1269	2561	11680	24160	gene-KI387_039024,Novel05318,Novel05459,gene-KI387_024347,gene-KI387_010897,gene-KI387_031270,gene-KI387_001721,gene-KI387_042576,gene-KI387_011991,gene-KI387_012620,Novel05798,Novel03051,gene-KI387_039791,gene-KI387_009152,Novel05423,gene-KI387_024641,gene-KI387_013507,Novel05453,gene-KI387_003006,gene-KI387_003306,Novel06667,gene-KI387_011998,gene-KI387_029237,Novel06984,gene-KI387_022545,Novel…
GO:0042162	telomeric DNA binding	molecular_function	0.45516	1	1	2561	6	24160	gene-KI387_000711
GO:0009452	7-methylguanosine RNA capping	biological_process	0.45529	1	3	2561	21	24160	gene-KI387_039978,gene-KI387_023692,gene-KI387_013487
GO:0036260	RNA capping	biological_process	0.45529	1	3	2561	21	24160	gene-KI387_023692,gene-KI387_039978,gene-KI387_013487
GO:0031406	carboxylic acid binding	molecular_function	0.45678	1	2	2561	14	24160	gene-KI387_022425,Novel01505
GO:0043177	organic acid binding	molecular_function	0.45678	1	2	2561	14	24160	Novel01505,gene-KI387_022425
GO:0051782	negative regulation of cell division	biological_process	0.45859	1	1	2561	7	24160	Novel02046
GO:0003909	DNA ligase activity	molecular_function	0.46109	1	3	2561	24	24160	gene-KI387_004765,gene-KI387_006345,gene-KI387_007380
GO:0016592	mediator complex	cellular_component	0.46138	1	11	2561	102	24160	gene-KI387_016982,gene-KI387_002879,gene-KI387_007502,gene-KI387_001414,gene-KI387_031983,gene-KI387_029522,gene-KI387_018974,gene-KI387_002877,Novel05424,gene-KI387_000369,gene-KI387_027425
GO:0010876	lipid localization	biological_process	0.46296	1	9	2561	84	24160	gene-KI387_009716,Novel00649,gene-KI387_021451,gene-KI387_037409,gene-KI387_026659,gene-KI387_026064,gene-KI387_000475,gene-KI387_028454,Novel01054
GO:0000978	RNA polymerase II cis-regulatory region sequence-specific DNA binding	molecular_function	0.46386	1	1	2561	6	24160	gene-KI387_033785
GO:0000987	cis-regulatory region sequence-specific DNA binding	molecular_function	0.46386	1	1	2561	6	24160	gene-KI387_033785
GO:0004683	calmodulin-dependent protein kinase activity	molecular_function	0.46448	1	1	2561	5	24160	gene-KI387_017437
GO:0071985	multivesicular body sorting pathway	biological_process	0.46654	1	1	2561	5	24160	Novel05199
GO:0008290	F-actin capping protein complex	cellular_component	0.46735	1	1	2561	7	24160	gene-KI387_001057
GO:0016866	intramolecular transferase activity	molecular_function	0.46769	1	5	2561	36	24160	Novel00158,gene-KI387_002582,gene-KI387_035893,Novel00259,gene-KI387_016407
GO:0043130	ubiquitin binding	molecular_function	0.46795	1	2	2561	15	24160	gene-KI387_006517,gene-KI387_035557
GO:0071554	cell wall organization or biogenesis	biological_process	0.4682	1	17	2561	148	24160	gene-KI387_029812,gene-KI387_010870,gene-KI387_014527,gene-KI387_028447,Novel05537,gene-KI387_010883,gene-KI387_018686,gene-KI387_025599,gene-KI387_014525,gene-KI387_014194,Novel03397,gene-KI387_006914,gene-KI387_038611,gene-KI387_009922,gene-KI387_014528,Novel01943,gene-KI387_010868
GO:0032507	maintenance of protein location in cell	biological_process	0.4703	1	2	2561	14	24160	gene-KI387_032806,Novel03071
GO:0045185	maintenance of protein location	biological_process	0.4703	1	2	2561	14	24160	Novel03071,gene-KI387_032806
GO:0051651	maintenance of location in cell	biological_process	0.4703	1	2	2561	14	24160	Novel03071,gene-KI387_032806
GO:0005516	calmodulin binding	molecular_function	0.4709	1	4	2561	28	24160	Novel00374,gene-KI387_017437,gene-KI387_024384,gene-KI387_017651
GO:0019900	kinase binding	molecular_function	0.47094	1	5	2561	47	24160	gene-KI387_028017,Novel02869,gene-KI387_023268,gene-KI387_037271,Novel00380
GO:0008653	lipopolysaccharide metabolic process	biological_process	0.47094	1	2	2561	15	24160	gene-KI387_015030,gene-KI387_034276
GO:0009103	lipopolysaccharide biosynthetic process	biological_process	0.47094	1	2	2561	15	24160	gene-KI387_015030,gene-KI387_034276
GO:0016126	sterol biosynthetic process	biological_process	0.47131	1	1	2561	6	24160	gene-KI387_013578
GO:0008942	nitrite reductase [NAD(P)H] activity	molecular_function	0.47239	1	1	2561	5	24160	gene-KI387_012550
GO:0046857	oxidoreductase activity, acting on other nitrogenous compounds as donors, with NAD or NADP as acceptor	molecular_function	0.47239	1	1	2561	5	24160	gene-KI387_012550
GO:0001772	immunological synapse	cellular_component	0.473	1	1	2561	5	24160	gene-KI387_010050
GO:0097197	tetraspanin-enriched microdomain	cellular_component	0.473	1	1	2561	5	24160	gene-KI387_010050
GO:0008272	sulfate transport	biological_process	0.47327	1	2	2561	14	24160	gene-KI387_019488,gene-KI387_033396
GO:0015116	sulfate transmembrane transporter activity	molecular_function	0.47327	1	2	2561	14	24160	gene-KI387_033396,gene-KI387_019488
GO:0072348	sulfur compound transport	biological_process	0.47327	1	2	2561	14	24160	gene-KI387_033396,gene-KI387_019488
GO:0004764	shikimate 3-dehydrogenase (NADP+) activity	molecular_function	0.4733	1	1	2561	5	24160	gene-KI387_001410
GO:0015288	porin activity	molecular_function	0.47341	1	1	2561	6	24160	Novel00157
GO:0022829	wide pore channel activity	molecular_function	0.47341	1	1	2561	6	24160	Novel00157
GO:0016211	ammonia ligase activity	molecular_function	0.47422	1	2	2561	14	24160	gene-KI387_015468,gene-KI387_037286
GO:0016880	acid-ammonia (or amide) ligase activity	molecular_function	0.47422	1	2	2561	14	24160	gene-KI387_015468,gene-KI387_037286
GO:0065002	intracellular protein transmembrane transport	biological_process	0.4749	1	4	2561	30	24160	gene-KI387_036235,gene-KI387_026485,Novel06400,Novel03171
GO:0046688	response to copper ion	biological_process	0.47571	1	1	2561	6	24160	gene-KI387_028330
GO:0005984	disaccharide metabolic process	biological_process	0.47718	1	5	2561	36	24160	gene-KI387_008462,gene-KI387_020429,gene-KI387_031081,gene-KI387_019070,gene-KI387_025580
GO:0006873	cellular ion homeostasis	biological_process	0.47719	1	6	2561	53	24160	gene-KI387_033235,Novel03745,gene-KI387_002162,Novel01687,gene-KI387_030057,gene-KI387_021973
GO:0006875	cellular metal ion homeostasis	biological_process	0.47719	1	6	2561	53	24160	Novel03745,gene-KI387_033235,Novel01687,gene-KI387_002162,gene-KI387_030057,gene-KI387_021973
GO:0030003	cellular cation homeostasis	biological_process	0.47719	1	6	2561	53	24160	gene-KI387_030057,gene-KI387_021973,Novel01687,gene-KI387_002162,Novel03745,gene-KI387_033235
GO:0055082	cellular chemical homeostasis	biological_process	0.47719	1	6	2561	53	24160	Novel03745,gene-KI387_033235,gene-KI387_030057,gene-KI387_021973,gene-KI387_002162,Novel01687
GO:0022904	respiratory electron transport chain	biological_process	0.47728	1	4	2561	36	24160	gene-KI387_007472,Novel03043,Novel04127,Novel07044
GO:0008250	oligosaccharyltransferase complex	cellular_component	0.47887	1	3	2561	24	24160	Novel05783,Novel00309,gene-KI387_030057
GO:0006094	gluconeogenesis	biological_process	0.47931	1	3	2561	22	24160	gene-KI387_010870,gene-KI387_024158,gene-KI387_038701
GO:0019319	hexose biosynthetic process	biological_process	0.47931	1	3	2561	22	24160	gene-KI387_038701,gene-KI387_024158,gene-KI387_010870
GO:0046364	monosaccharide biosynthetic process	biological_process	0.47931	1	3	2561	22	24160	gene-KI387_024158,gene-KI387_038701,gene-KI387_010870
GO:0046916	cellular transition metal ion homeostasis	biological_process	0.47933	1	2	2561	14	24160	gene-KI387_002162,gene-KI387_030057
GO:0022624	proteasome accessory complex	cellular_component	0.47996	1	1	2561	7	24160	gene-KI387_027425
GO:0005746	mitochondrial respirasome	cellular_component	0.48058	1	4	2561	33	24160	gene-KI387_008350,Novel07044,gene-KI387_007472,Novel04667
GO:0005774	vacuolar membrane	cellular_component	0.48063	1	6	2561	46	24160	gene-KI387_021501,gene-KI387_018689,Novel05551,gene-KI387_038848,gene-KI387_035419,Novel01818
GO:0098800	inner mitochondrial membrane protein complex	cellular_component	0.48095	1	15	2561	133	24160	Novel07044,Novel07069,gene-KI387_024718,gene-KI387_030547,gene-KI387_019016,gene-KI387_010752,gene-KI387_014772,gene-KI387_026485,gene-KI387_034894,gene-KI387_025064,gene-KI387_007472,gene-KI387_008350,gene-KI387_035280,Novel04667,Novel00407
GO:0052652	cyclic purine nucleotide metabolic process	biological_process	0.48149	1	1	2561	8	24160	Novel05887
GO:0000772	mating pheromone activity	molecular_function	0.4831	1	2	2561	13	24160	gene-KI387_024079,gene-KI387_037340
GO:0009289	pilus	cellular_component	0.48473	1	1	2561	6	24160	gene-KI387_029519
GO:0003883	CTP synthase activity	molecular_function	0.48522	1	1	2561	6	24160	gene-KI387_024769
GO:0015081	sodium ion transmembrane transporter activity	molecular_function	0.48556	1	4	2561	31	24160	gene-KI387_015139,gene-KI387_020139,gene-KI387_004864,gene-KI387_018341
GO:0005283	amino acid:sodium symporter activity	molecular_function	0.4856	1	1	2561	5	24160	gene-KI387_018341
GO:0005343	organic acid:sodium symporter activity	molecular_function	0.4856	1	1	2561	5	24160	gene-KI387_018341
GO:0005416	amino acid:cation symporter activity	molecular_function	0.4856	1	1	2561	5	24160	gene-KI387_018341
GO:0015175	neutral amino acid transmembrane transporter activity	molecular_function	0.4856	1	1	2561	5	24160	gene-KI387_018341
GO:0015655	alanine:sodium symporter activity	molecular_function	0.4856	1	1	2561	5	24160	gene-KI387_018341
GO:0015804	neutral amino acid transport	biological_process	0.4856	1	1	2561	5	24160	gene-KI387_018341
GO:0022858	alanine transmembrane transporter activity	molecular_function	0.4856	1	1	2561	5	24160	gene-KI387_018341
GO:0032328	alanine transport	biological_process	0.4856	1	1	2561	5	24160	gene-KI387_018341
GO:0004576	oligosaccharyl transferase activity	molecular_function	0.48562	1	1	2561	5	24160	gene-KI387_016284
GO:0006952	defense response	biological_process	0.48613	1	41	2561	449	24160	gene-KI387_019525,gene-KI387_005794,gene-KI387_020629,gene-KI387_010387,Novel01753,gene-KI387_002400,gene-KI387_035236,gene-KI387_003051,gene-KI387_001400,gene-KI387_010391,gene-KI387_038848,gene-KI387_010390,gene-KI387_004619,gene-KI387_032521,gene-KI387_004620,gene-KI387_015696,gene-KI387_019524,gene-KI387_012665,Novel06722,gene-KI387_026663,gene-KI387_021358,gene-KI387_006747,gene-KI387_015698…
GO:1901292	nucleoside phosphate catabolic process	biological_process	0.4872	1	2	2561	17	24160	gene-KI387_002048,gene-KI387_004168
GO:0008948	oxaloacetate decarboxylase activity	molecular_function	0.48791	1	2	2561	16	24160	gene-KI387_004864,gene-KI387_020139
GO:0035725	sodium ion transmembrane transport	biological_process	0.48791	1	2	2561	16	24160	gene-KI387_004864,gene-KI387_020139
GO:0036376	sodium ion export across plasma membrane	biological_process	0.48791	1	2	2561	16	24160	gene-KI387_020139,gene-KI387_004864
GO:0004826	phenylalanine-tRNA ligase activity	molecular_function	0.48905	1	1	2561	5	24160	Novel06683
GO:0015672	monovalent inorganic cation transport	biological_process	0.48916	1	52	2561	466	24160	gene-KI387_030451,gene-KI387_014656,gene-KI387_019016,gene-KI387_010745,gene-KI387_020224,gene-KI387_027147,gene-KI387_037409,gene-KI387_019136,gene-KI387_021501,Novel06565,Novel05957,gene-KI387_017651,gene-KI387_026339,gene-KI387_014750,gene-KI387_009658,gene-KI387_026421,Novel07069,gene-KI387_009463,gene-KI387_018689,gene-KI387_014772,gene-KI387_001721,gene-KI387_014653,gene-KI387_018341,gene-K…
GO:0030203	glycosaminoglycan metabolic process	biological_process	0.48947	1	2	2561	16	24160	gene-KI387_012882,Novel05537
GO:0008811	chloramphenicol O-acetyltransferase activity	molecular_function	0.48957	1	1	2561	6	24160	gene-KI387_004168
GO:0004497	monooxygenase activity	molecular_function	0.48958	1	12	2561	100	24160	gene-KI387_014656,gene-KI387_009566,gene-KI387_024648,Novel01219,gene-KI387_035360,gene-KI387_031855,gene-KI387_008229,Novel06134,gene-KI387_016280,gene-KI387_022917,gene-KI387_008594,gene-KI387_000255
GO:0009143	nucleoside triphosphate catabolic process	biological_process	0.49048	1	1	2561	7	24160	gene-KI387_004168
GO:0045259	proton-transporting ATP synthase complex	cellular_component	0.49171	1	9	2561	81	24160	gene-KI387_035280,Novel00407,Novel07069,gene-KI387_009463,gene-KI387_019016,gene-KI387_037409,gene-KI387_025064,gene-KI387_034894,gene-KI387_014772
GO:0033588	Elongator holoenzyme complex	cellular_component	0.49268	1	3	2561	24	24160	gene-KI387_011327,gene-KI387_006186,gene-KI387_027845
GO:0042822	pyridoxal phosphate metabolic process	biological_process	0.49336	1	1	2561	5	24160	gene-KI387_022362
GO:0042823	pyridoxal phosphate biosynthetic process	biological_process	0.49336	1	1	2561	5	24160	gene-KI387_022362
GO:0046184	aldehyde biosynthetic process	biological_process	0.49336	1	1	2561	5	24160	gene-KI387_022362
GO:0019048	modulation by virus of host process	biological_process	0.49406	1	7	2561	57	24160	gene-KI387_029292,gene-KI387_006519,Novel03955,gene-KI387_024362,gene-KI387_006093,gene-KI387_012488,gene-KI387_004095
GO:0035821	modulation of process of other organism	biological_process	0.49406	1	7	2561	57	24160	gene-KI387_024362,Novel03955,gene-KI387_004095,gene-KI387_012488,gene-KI387_006093,gene-KI387_029292,gene-KI387_006519
GO:0044003	modulation by symbiont of host process	biological_process	0.49406	1	7	2561	57	24160	gene-KI387_006519,gene-KI387_029292,gene-KI387_006093,gene-KI387_004095,gene-KI387_012488,Novel03955,gene-KI387_024362
GO:0051817	modulation of process of other organism involved in symbiotic interaction	biological_process	0.49406	1	7	2561	57	24160	gene-KI387_006093,gene-KI387_012488,gene-KI387_004095,Novel03955,gene-KI387_024362,gene-KI387_006519,gene-KI387_029292
GO:0004592	pantoate-beta-alanine ligase activity	molecular_function	0.49472	1	1	2561	6	24160	gene-KI387_014788
GO:0051304	chromosome separation	biological_process	0.49484	1	2	2561	16	24160	gene-KI387_023267,gene-KI387_011930
GO:0003855	3-dehydroquinate dehydratase activity	molecular_function	0.49506	1	1	2561	5	24160	gene-KI387_001410
GO:0009790	embryo development	biological_process	0.49609	1	2	2561	14	24160	Novel02622,Novel02621
GO:0038023	signaling receptor activity	molecular_function	0.49661	1	14	2561	117	24160	gene-KI387_015465,Novel02948,Novel00856,gene-KI387_032373,gene-KI387_028491,gene-KI387_000395,gene-KI387_036274,gene-KI387_005794,gene-KI387_016526,gene-KI387_018829,gene-KI387_009471,gene-KI387_022425,gene-KI387_000406,gene-KI387_005536
GO:0000165	MAPK cascade	biological_process	0.49838	1	1	2561	5	24160	gene-KI387_034734
GO:0023014	signal transduction by protein phosphorylation	biological_process	0.49838	1	1	2561	5	24160	gene-KI387_034734
GO:0043408	regulation of MAPK cascade	biological_process	0.49838	1	1	2561	5	24160	gene-KI387_034734
GO:0043410	positive regulation of MAPK cascade	biological_process	0.49838	1	1	2561	5	24160	gene-KI387_034734
GO:0000226	microtubule cytoskeleton organization	biological_process	0.49967	1	4	2561	35	24160	gene-KI387_006777,gene-KI387_006174,gene-KI387_017028,Novel01517
GO:0055065	metal ion homeostasis	biological_process	0.50133	1	6	2561	54	24160	Novel01687,gene-KI387_002162,gene-KI387_030057,gene-KI387_021973,gene-KI387_033235,Novel03745
GO:0070585	protein localization to mitochondrion	biological_process	0.50267	1	3	2561	22	24160	Novel03171,gene-KI387_026485,gene-KI387_036235
GO:0072655	establishment of protein localization to mitochondrion	biological_process	0.50267	1	3	2561	22	24160	gene-KI387_026485,Novel03171,gene-KI387_036235
GO:0006091	generation of precursor metabolites and energy	biological_process	0.503	1	25	2561	228	24160	gene-KI387_015818,gene-KI387_018567,Novel03043,gene-KI387_011849,gene-KI387_022290,gene-KI387_031072,gene-KI387_017946,gene-KI387_011850,Novel06401,gene-KI387_007472,gene-KI387_036098,Novel05342,Novel00184,gene-KI387_014383,gene-KI387_005815,Novel04127,gene-KI387_026883,gene-KI387_035983,Novel00947,Novel00948,Novel07044,gene-KI387_016407,gene-KI387_038848,gene-KI387_022767,gene-KI387_035754
GO:0006612	protein targeting to membrane	biological_process	0.50323	1	9	2561	79	24160	gene-KI387_020344,gene-KI387_011006,gene-KI387_028330,gene-KI387_022631,Novel06400,gene-KI387_037686,gene-KI387_023506,gene-KI387_018113,gene-KI387_018299
GO:0016423	tRNA (guanine) methyltransferase activity	molecular_function	0.50343	1	3	2561	22	24160	Novel00140,gene-KI387_006188,gene-KI387_006187
GO:0017004	cytochrome complex assembly	biological_process	0.50488	1	8	2561	74	24160	Novel04609,Novel03495,gene-KI387_007805,gene-KI387_006060,gene-KI387_001249,gene-KI387_029388,gene-KI387_031864,gene-KI387_023457
GO:0008745	N-acetylmuramoyl-L-alanine amidase activity	molecular_function	0.50502	1	1	2561	8	24160	gene-KI387_012882
GO:0003997	acyl-CoA oxidase activity	molecular_function	0.50534	1	1	2561	6	24160	gene-KI387_039315
GO:0019829	ATPase-coupled cation transmembrane transporter activity	molecular_function	0.50798	1	5	2561	38	24160	gene-KI387_021501,gene-KI387_005377,Novel01818,gene-KI387_038848,gene-KI387_018689
GO:0042625	ATPase-coupled ion transmembrane transporter activity	molecular_function	0.50798	1	5	2561	38	24160	gene-KI387_021501,gene-KI387_005377,Novel01818,gene-KI387_018689,gene-KI387_038848
GO:0007606	sensory perception of chemical stimulus	biological_process	0.50841	1	3	2561	23	24160	Novel06403,gene-KI387_009471,Novel06404
GO:0016667	oxidoreductase activity, acting on a sulfur group of donors	molecular_function	0.50846	1	8	2561	79	24160	gene-KI387_035574,gene-KI387_011006,gene-KI387_011850,gene-KI387_026888,gene-KI387_038769,gene-KI387_009544,gene-KI387_024703,gene-KI387_032593
GO:0033044	regulation of chromosome organization	biological_process	0.50949	1	2	2561	16	24160	gene-KI387_023267,gene-KI387_011930
GO:0006816	calcium ion transport	biological_process	0.51124	1	3	2561	25	24160	gene-KI387_009714,Novel03809,Novel03614
GO:0000428	DNA-directed RNA polymerase complex	cellular_component	0.51165	1	9	2561	82	24160	gene-KI387_038625,gene-KI387_023267,gene-KI387_005470,gene-KI387_004985,gene-KI387_006093,Novel00871,gene-KI387_001692,gene-KI387_014284,gene-KI387_027845
GO:0055029	nuclear DNA-directed RNA polymerase complex	cellular_component	0.51165	1	9	2561	82	24160	gene-KI387_005470,gene-KI387_006093,gene-KI387_004985,gene-KI387_038625,gene-KI387_023267,gene-KI387_027845,gene-KI387_014284,Novel00871,gene-KI387_001692
GO:0019080	viral gene expression	biological_process	0.51184	1	5	2561	42	24160	gene-KI387_021941,Novel00621,gene-KI387_021939,gene-KI387_039689,gene-KI387_039023
GO:0048731	system development	biological_process	0.51198	1	7	2561	63	24160	gene-KI387_024614,Novel02622,gene-KI387_007216,Novel06191,gene-KI387_028341,Novel02621,gene-KI387_009714
GO:0050852	T cell receptor signaling pathway	biological_process	0.51409	1	1	2561	5	24160	Novel00871
GO:0006625	protein targeting to peroxisome	biological_process	0.51555	1	1	2561	7	24160	gene-KI387_011006
GO:0015919	peroxisomal membrane transport	biological_process	0.51555	1	1	2561	7	24160	gene-KI387_011006
GO:0043574	peroxisomal transport	biological_process	0.51555	1	1	2561	7	24160	gene-KI387_011006
GO:0072662	protein localization to peroxisome	biological_process	0.51555	1	1	2561	7	24160	gene-KI387_011006
GO:0072663	establishment of protein localization to peroxisome	biological_process	0.51555	1	1	2561	7	24160	gene-KI387_011006
GO:0007155	cell adhesion	biological_process	0.51619	1	12	2561	105	24160	Novel01505,gene-KI387_037606,gene-KI387_020503,gene-KI387_018046,Novel01428,Novel05922,gene-KI387_023996,gene-KI387_023268,gene-KI387_037240,Novel03866,gene-KI387_035593,gene-KI387_016721
GO:0007423	sensory organ development	biological_process	0.51643	1	1	2561	7	24160	gene-KI387_007216
GO:0000295	adenine nucleotide transmembrane transporter activity	molecular_function	0.51644	1	1	2561	5	24160	gene-KI387_030438
GO:0005346	purine ribonucleotide transmembrane transporter activity	molecular_function	0.51644	1	1	2561	5	24160	gene-KI387_030438
GO:0015215	nucleotide transmembrane transporter activity	molecular_function	0.51644	1	1	2561	5	24160	gene-KI387_030438
GO:0015216	purine nucleotide transmembrane transporter activity	molecular_function	0.51644	1	1	2561	5	24160	gene-KI387_030438
GO:0015605	organophosphate ester transmembrane transporter activity	molecular_function	0.51644	1	1	2561	5	24160	gene-KI387_030438
GO:0034464	BBSome	cellular_component	0.5174	1	1	2561	6	24160	gene-KI387_035557
GO:0004602	glutathione peroxidase activity	molecular_function	0.51758	1	1	2561	9	24160	Novel02720
GO:1901682	sulfur compound transmembrane transporter activity	molecular_function	0.51774	1	2	2561	15	24160	gene-KI387_033396,gene-KI387_019488
GO:0008113	peptide-methionine (S)-S-oxide reductase activity	molecular_function	0.51774	1	1	2561	8	24160	gene-KI387_035574
GO:1990397	queuosine salvage	biological_process	0.51883	1	1	2561	5	24160	gene-KI387_028643
GO:0006553	lysine metabolic process	biological_process	0.51915	1	4	2561	38	24160	gene-KI387_011705,gene-KI387_021590,gene-KI387_032801,gene-KI387_036183
GO:0009891	positive regulation of biosynthetic process	biological_process	0.51958	1	7	2561	63	24160	gene-KI387_039861,Novel00136,gene-KI387_019578,gene-KI387_000263,gene-KI387_021598,gene-KI387_009252,gene-KI387_003664
GO:0010557	positive regulation of macromolecule biosynthetic process	biological_process	0.51958	1	7	2561	63	24160	gene-KI387_003664,gene-KI387_009252,gene-KI387_021598,gene-KI387_000263,Novel00136,gene-KI387_019578,gene-KI387_039861
GO:0031328	positive regulation of cellular biosynthetic process	biological_process	0.51958	1	7	2561	63	24160	gene-KI387_000263,Novel00136,gene-KI387_039861,gene-KI387_019578,gene-KI387_003664,gene-KI387_009252,gene-KI387_021598
GO:0009190	cyclic nucleotide biosynthetic process	biological_process	0.51973	1	1	2561	9	24160	Novel05887
GO:0009056	catabolic process	biological_process	0.52022	1	64	2561	596	24160	Novel04874,gene-KI387_019247,gene-KI387_014525,gene-KI387_015549,gene-KI387_012774,gene-KI387_012882,gene-KI387_007687,gene-KI387_033437,gene-KI387_021877,Novel05537,gene-KI387_035983,gene-KI387_023131,gene-KI387_020865,gene-KI387_022767,gene-KI387_015139,gene-KI387_021849,gene-KI387_014383,Novel05342,gene-KI387_012304,gene-KI387_014285,Novel06519,gene-KI387_011792,gene-KI387_036306,gene-KI387_01…
GO:0000079	regulation of cyclin-dependent protein serine/threonine kinase activity	biological_process	0.52185	1	2	2561	16	24160	Novel00380,Novel02869
GO:1904029	regulation of cyclin-dependent protein kinase activity	biological_process	0.52185	1	2	2561	16	24160	Novel00380,Novel02869
GO:0008237	metallopeptidase activity	molecular_function	0.52235	1	13	2561	110	24160	gene-KI387_008516,Novel02509,gene-KI387_022601,Novel04355,gene-KI387_005453,Novel02664,gene-KI387_015491,gene-KI387_032110,gene-KI387_035883,Novel04289,gene-KI387_012029,gene-KI387_006060,gene-KI387_003012
GO:0009725	response to hormone	biological_process	0.52269	1	9	2561	85	24160	gene-KI387_024347,gene-KI387_016635,gene-KI387_004191,gene-KI387_039891,gene-KI387_017240,gene-KI387_026607,gene-KI387_035508,Novel03716,gene-KI387_019459
GO:0016042	lipid catabolic process	biological_process	0.5235	1	6	2561	51	24160	gene-KI387_020865,gene-KI387_005309,gene-KI387_039315,gene-KI387_023131,gene-KI387_028454,gene-KI387_038064
GO:1903825	organic acid transmembrane transport	biological_process	0.52381	1	4	2561	35	24160	gene-KI387_039007,gene-KI387_034755,Novel02921,gene-KI387_012659
GO:1905039	carboxylic acid transmembrane transport	biological_process	0.52381	1	4	2561	35	24160	Novel02921,gene-KI387_012659,gene-KI387_034755,gene-KI387_039007
GO:0055076	transition metal ion homeostasis	biological_process	0.52402	1	2	2561	15	24160	gene-KI387_002162,gene-KI387_030057
GO:0006620	posttranslational protein targeting to endoplasmic reticulum membrane	biological_process	0.52468	1	1	2561	6	24160	Novel06400
GO:0031204	posttranslational protein targeting to membrane, translocation	biological_process	0.52468	1	1	2561	6	24160	Novel06400
GO:0031205	endoplasmic reticulum Sec complex	cellular_component	0.52468	1	1	2561	6	24160	Novel06400
GO:0031207	Sec62/Sec63 complex	cellular_component	0.52468	1	1	2561	6	24160	Novel06400
GO:0006220	pyrimidine nucleotide metabolic process	biological_process	0.52599	1	1	2561	7	24160	gene-KI387_024769
GO:0006221	pyrimidine nucleotide biosynthetic process	biological_process	0.52599	1	1	2561	7	24160	gene-KI387_024769
GO:0033218	amide binding	molecular_function	0.52616	1	3	2561	25	24160	gene-KI387_007738,gene-KI387_004621,gene-KI387_032806
GO:0006120	mitochondrial electron transport, NADH to ubiquinone	biological_process	0.52659	1	2	2561	16	24160	Novel04127,Novel03043
GO:0009690	cytokinin metabolic process	biological_process	0.5266	1	2	2561	14	24160	gene-KI387_039318,gene-KI387_018063
GO:0019139	cytokinin dehydrogenase activity	molecular_function	0.5266	1	2	2561	14	24160	gene-KI387_018063,gene-KI387_039318
GO:0034754	cellular hormone metabolic process	biological_process	0.5266	1	2	2561	14	24160	gene-KI387_039318,gene-KI387_018063
GO:0009317	acetyl-CoA carboxylase complex	cellular_component	0.52667	1	1	2561	6	24160	Novel00672
GO:0044282	small molecule catabolic process	biological_process	0.52838	1	7	2561	61	24160	gene-KI387_011792,gene-KI387_012304,gene-KI387_016502,gene-KI387_012305,gene-KI387_011785,gene-KI387_016407,gene-KI387_039315
GO:0070403	NAD+ binding	molecular_function	0.52885	1	1	2561	6	24160	gene-KI387_031756
GO:0015079	potassium ion transmembrane transporter activity	molecular_function	0.52983	1	9	2561	74	24160	gene-KI387_006314,gene-KI387_017651,gene-KI387_005377,Novel02854,gene-KI387_009658,gene-KI387_014600,gene-KI387_009504,gene-KI387_034485,gene-KI387_001721
GO:0004484	mRNA guanylyltransferase activity	molecular_function	0.52991	1	1	2561	6	24160	gene-KI387_023692
GO:0043549	regulation of kinase activity	biological_process	0.53043	1	3	2561	24	24160	gene-KI387_034734,Novel00380,Novel02869
GO:0045859	regulation of protein kinase activity	biological_process	0.53043	1	3	2561	24	24160	Novel00380,gene-KI387_034734,Novel02869
GO:0051338	regulation of transferase activity	biological_process	0.53043	1	3	2561	24	24160	Novel00380,gene-KI387_034734,Novel02869
GO:0006072	glycerol-3-phosphate metabolic process	biological_process	0.53171	1	2	2561	15	24160	gene-KI387_014285,gene-KI387_030645
GO:0046168	glycerol-3-phosphate catabolic process	biological_process	0.53171	1	2	2561	15	24160	gene-KI387_030645,gene-KI387_014285
GO:0052646	alditol phosphate metabolic process	biological_process	0.53171	1	2	2561	15	24160	gene-KI387_014285,gene-KI387_030645
GO:0022603	regulation of anatomical structure morphogenesis	biological_process	0.5344	1	1	2561	6	24160	gene-KI387_003367
GO:0072594	establishment of protein localization to organelle	biological_process	0.53604	1	17	2561	150	24160	gene-KI387_026485,gene-KI387_028330,gene-KI387_020344,gene-KI387_037271,gene-KI387_006314,gene-KI387_036235,gene-KI387_037686,gene-KI387_022631,gene-KI387_028819,Novel06400,Novel03171,gene-KI387_011006,gene-KI387_023267,gene-KI387_018299,gene-KI387_018113,gene-KI387_023268,gene-KI387_023506
GO:0008146	sulfotransferase activity	molecular_function	0.5363	1	1	2561	7	24160	gene-KI387_017010
GO:0051082	unfolded protein binding	molecular_function	0.53647	1	11	2561	113	24160	gene-KI387_006093,gene-KI387_018686,gene-KI387_005824,gene-KI387_014867,gene-KI387_023268,gene-KI387_032808,gene-KI387_004292,gene-KI387_002879,gene-KI387_032850,gene-KI387_019566,gene-KI387_007969
GO:0006098	pentose-phosphate shunt	biological_process	0.53683	1	1	2561	7	24160	gene-KI387_036098
GO:0006740	NADPH regeneration	biological_process	0.53683	1	1	2561	7	24160	gene-KI387_036098
GO:0051156	glucose 6-phosphate metabolic process	biological_process	0.53683	1	1	2561	7	24160	gene-KI387_036098
GO:0048285	organelle fission	biological_process	0.53696	1	8	2561	70	24160	gene-KI387_002709,gene-KI387_011930,gene-KI387_003006,gene-KI387_025538,Novel00295,gene-KI387_023267,Novel00672,Novel01237
GO:0005576	extracellular region	cellular_component	0.53743	1	78	2561	778	24160	gene-KI387_014676,gene-KI387_003208,Novel02509,Novel05930,gene-KI387_029221,gene-KI387_030823,Novel01110,Novel02684,gene-KI387_014678,gene-KI387_021451,gene-KI387_036306,Novel07290,gene-KI387_038064,gene-KI387_020071,gene-KI387_001729,Novel02377,Novel05736,gene-KI387_001704,gene-KI387_034734,gene-KI387_024614,gene-KI387_020888,gene-KI387_015657,gene-KI387_014712,gene-KI387_029041,gene-KI387_00737…
GO:0005086	ARF guanyl-nucleotide exchange factor activity	molecular_function	0.53765	1	1	2561	6	24160	Novel04574
GO:0007265	Ras protein signal transduction	biological_process	0.53765	1	1	2561	6	24160	Novel04574
GO:0032011	ARF protein signal transduction	biological_process	0.53765	1	1	2561	6	24160	Novel04574
GO:0032012	regulation of ARF protein signal transduction	biological_process	0.53765	1	1	2561	6	24160	Novel04574
GO:0046578	regulation of Ras protein signal transduction	biological_process	0.53765	1	1	2561	6	24160	Novel04574
GO:0051056	regulation of small GTPase mediated signal transduction	biological_process	0.53765	1	1	2561	6	24160	Novel04574
GO:0050145	nucleoside monophosphate kinase activity	molecular_function	0.53799	1	5	2561	41	24160	Novel06296,gene-KI387_012777,gene-KI387_026529,gene-KI387_038959,gene-KI387_007535
GO:0003919	FMN adenylyltransferase activity	molecular_function	0.53829	1	1	2561	6	24160	gene-KI387_010260
GO:0046870	cadmium ion binding	molecular_function	0.5383	1	1	2561	8	24160	gene-KI387_039141
GO:0009063	cellular amino acid catabolic process	biological_process	0.53831	1	4	2561	34	24160	gene-KI387_012304,gene-KI387_016502,gene-KI387_012305,gene-KI387_016407
GO:2001070	starch binding	molecular_function	0.53853	1	2	2561	17	24160	gene-KI387_031342,gene-KI387_009471
GO:0035091	phosphatidylinositol binding	molecular_function	0.53863	1	3	2561	23	24160	gene-KI387_006517,gene-KI387_011561,gene-KI387_035557
GO:0016984	ribulose-bisphosphate carboxylase activity	molecular_function	0.53888	1	1	2561	6	24160	gene-KI387_000885
GO:0099513	polymeric cytoskeletal fiber	cellular_component	0.53892	1	4	2561	39	24160	gene-KI387_007245,gene-KI387_017619,gene-KI387_013451,gene-KI387_024647
GO:0031109	microtubule polymerization or depolymerization	biological_process	0.53932	1	1	2561	6	24160	Novel01517
GO:0031110	regulation of microtubule polymerization or depolymerization	biological_process	0.53932	1	1	2561	6	24160	Novel01517
GO:0070507	regulation of microtubule cytoskeleton organization	biological_process	0.53932	1	1	2561	6	24160	Novel01517
GO:0008990	rRNA (guanine-N2-)-methyltransferase activity	molecular_function	0.54003	1	1	2561	6	24160	gene-KI387_019145
GO:0003857	3-hydroxyacyl-CoA dehydrogenase activity	molecular_function	0.54075	1	7	2561	59	24160	gene-KI387_007867,gene-KI387_033131,gene-KI387_036098,gene-KI387_009489,Novel02836,gene-KI387_014285,gene-KI387_007868
GO:0031072	heat shock protein binding	molecular_function	0.54097	1	3	2561	28	24160	gene-KI387_014867,gene-KI387_004292,gene-KI387_005824
GO:0004470	malic enzyme activity	molecular_function	0.54226	1	1	2561	7	24160	gene-KI387_005638
GO:0004471	malate dehydrogenase (decarboxylating) (NAD+) activity	molecular_function	0.54226	1	1	2561	7	24160	gene-KI387_005638
GO:0016615	malate dehydrogenase activity	molecular_function	0.54226	1	1	2561	7	24160	gene-KI387_005638
GO:0051302	regulation of cell division	biological_process	0.54304	1	2	2561	21	24160	Novel01501,Novel02046
GO:0060089	molecular transducer activity	molecular_function	0.54346	1	14	2561	120	24160	gene-KI387_009471,gene-KI387_000406,gene-KI387_022425,gene-KI387_005536,gene-KI387_016526,gene-KI387_018829,gene-KI387_028491,gene-KI387_032373,gene-KI387_036274,gene-KI387_005794,gene-KI387_000395,Novel02948,gene-KI387_015465,Novel00856
GO:0042393	histone binding	molecular_function	0.54379	1	2	2561	16	24160	gene-KI387_026686,Novel05617
GO:0005534	galactose binding	molecular_function	0.54411	1	1	2561	8	24160	gene-KI387_023692
GO:0019773	proteasome core complex, alpha-subunit complex	cellular_component	0.5451	1	2	2561	19	24160	Novel02438,gene-KI387_021849
GO:0019050	suppression by virus of host apoptotic process	biological_process	0.54512	1	1	2561	7	24160	gene-KI387_006519
GO:0033668	negative regulation by symbiont of host apoptotic process	biological_process	0.54512	1	1	2561	7	24160	gene-KI387_006519
GO:0052041	negative regulation by symbiont of host programmed cell death	biological_process	0.54512	1	1	2561	7	24160	gene-KI387_006519
GO:0016987	sigma factor activity	molecular_function	0.54551	1	4	2561	36	24160	gene-KI387_006674,gene-KI387_039337,gene-KI387_008084,gene-KI387_006093
GO:0050801	ion homeostasis	biological_process	0.54566	1	6	2561	56	24160	gene-KI387_002162,Novel01687,gene-KI387_030057,gene-KI387_021973,gene-KI387_033235,Novel03745
GO:0055080	cation homeostasis	biological_process	0.54566	1	6	2561	56	24160	Novel03745,gene-KI387_033235,Novel01687,gene-KI387_002162,gene-KI387_021973,gene-KI387_030057
GO:0098771	inorganic ion homeostasis	biological_process	0.54566	1	6	2561	56	24160	Novel03745,gene-KI387_033235,gene-KI387_021973,gene-KI387_030057,Novel01687,gene-KI387_002162
GO:0004559	alpha-mannosidase activity	molecular_function	0.54593	1	3	2561	24	24160	gene-KI387_035939,Novel05913,gene-KI387_026897
GO:0015923	mannosidase activity	molecular_function	0.54593	1	3	2561	24	24160	gene-KI387_035939,gene-KI387_026897,Novel05913
GO:0004435	phosphatidylinositol phospholipase C activity	molecular_function	0.54664	1	1	2561	6	24160	gene-KI387_037433
GO:0004629	phospholipase C activity	molecular_function	0.54664	1	1	2561	6	24160	gene-KI387_037433
GO:0070449	elongin complex	cellular_component	0.54675	1	1	2561	8	24160	gene-KI387_017437
GO:0044743	protein transmembrane import into intracellular organelle	biological_process	0.54797	1	3	2561	24	24160	gene-KI387_026485,Novel03171,gene-KI387_036235
GO:0001510	RNA methylation	biological_process	0.54814	1	5	2561	43	24160	gene-KI387_019145,gene-KI387_039978,gene-KI387_011450,gene-KI387_027813,Novel07116
GO:0006779	porphyrin-containing compound biosynthetic process	biological_process	0.54825	1	4	2561	32	24160	gene-KI387_034742,Novel05750,gene-KI387_036227,gene-KI387_027652
GO:0004650	polygalacturonase activity	molecular_function	0.54923	1	4	2561	31	24160	gene-KI387_009908,gene-KI387_019059,gene-KI387_005268,gene-KI387_019058
GO:0008519	ammonium transmembrane transporter activity	molecular_function	0.54949	1	2	2561	14	24160	gene-KI387_019418,gene-KI387_020224
GO:0015696	ammonium transport	biological_process	0.54949	1	2	2561	14	24160	gene-KI387_019418,gene-KI387_020224
GO:0009360	DNA polymerase III complex	cellular_component	0.55055	1	2	2561	15	24160	gene-KI387_008489,Novel03474
GO:0010256	endomembrane system organization	biological_process	0.55086	1	6	2561	58	24160	gene-KI387_026264,gene-KI387_005866,gene-KI387_023267,gene-KI387_026064,Novel03376,gene-KI387_023268
GO:0045005	DNA-dependent DNA replication maintenance of fidelity	biological_process	0.55159	1	1	2561	7	24160	gene-KI387_027752
GO:0000818	nuclear MIS12/MIND complex	cellular_component	0.55422	1	1	2561	9	24160	gene-KI387_007245
GO:0015969	guanosine tetraphosphate metabolic process	biological_process	0.55544	1	1	2561	6	24160	gene-KI387_009991
GO:0034035	purine ribonucleoside bisphosphate metabolic process	biological_process	0.55544	1	1	2561	6	24160	gene-KI387_009991
GO:0008544	epidermis development	biological_process	0.55546	1	1	2561	8	24160	Novel06191
GO:0015370	solute:sodium symporter activity	molecular_function	0.55586	1	1	2561	6	24160	gene-KI387_018341
GO:0050661	NADP binding	molecular_function	0.55659	1	9	2561	77	24160	gene-KI387_014656,gene-KI387_011587,gene-KI387_036098,gene-KI387_003087,gene-KI387_026259,gene-KI387_033741,gene-KI387_011705,gene-KI387_033131,gene-KI387_012550
GO:0043937	regulation of sporulation	biological_process	0.55937	1	1	2561	7	24160	gene-KI387_017554
GO:0042816	vitamin B6 metabolic process	biological_process	0.5594	1	1	2561	6	24160	gene-KI387_022362
GO:0042819	vitamin B6 biosynthetic process	biological_process	0.5594	1	1	2561	6	24160	gene-KI387_022362
GO:0045444	fat cell differentiation	biological_process	0.56035	1	2	2561	16	24160	gene-KI387_031514,Novel03765
GO:0071806	protein transmembrane transport	biological_process	0.56131	1	4	2561	34	24160	gene-KI387_036235,Novel06400,Novel03171,gene-KI387_026485
GO:0043603	cellular amide metabolic process	biological_process	0.56132	1	109	2561	1004	24160	Novel00446,gene-KI387_031270,gene-KI387_030155,gene-KI387_000263,gene-KI387_014788,gene-KI387_035314,gene-KI387_030897,Novel05459,gene-KI387_034008,gene-KI387_017324,Novel03051,gene-KI387_013144,gene-KI387_037158,gene-KI387_015465,Novel02126,gene-KI387_009524,Novel03338,gene-KI387_001851,gene-KI387_025601,gene-KI387_031023,gene-KI387_016526,gene-KI387_028812,gene-KI387_026695,gene-KI387_016577,ge…
GO:0051499	D-aminoacyl-tRNA deacylase activity	molecular_function	0.56156	1	1	2561	8	24160	gene-KI387_017027
GO:0006874	cellular calcium ion homeostasis	biological_process	0.5624	1	4	2561	39	24160	gene-KI387_033235,Novel03745,Novel01687,gene-KI387_021973
GO:0055074	calcium ion homeostasis	biological_process	0.5624	1	4	2561	39	24160	gene-KI387_021973,Novel01687,Novel03745,gene-KI387_033235
GO:0072503	cellular divalent inorganic cation homeostasis	biological_process	0.5624	1	4	2561	39	24160	Novel01687,gene-KI387_021973,Novel03745,gene-KI387_033235
GO:0072507	divalent inorganic cation homeostasis	biological_process	0.5624	1	4	2561	39	24160	gene-KI387_033235,Novel03745,Novel01687,gene-KI387_021973
GO:1901565	organonitrogen compound catabolic process	biological_process	0.56401	1	27	2561	257	24160	gene-KI387_012304,gene-KI387_006914,gene-KI387_014194,gene-KI387_024812,gene-KI387_021849,gene-KI387_020865,gene-KI387_012305,Novel03376,gene-KI387_018341,gene-KI387_014528,gene-KI387_019865,Novel02438,gene-KI387_010362,gene-KI387_016407,gene-KI387_012882,Novel05537,gene-KI387_021877,gene-KI387_018662,gene-KI387_028447,gene-KI387_016502,gene-KI387_014527,Novel03338,gene-KI387_012774,gene-KI387_01…
GO:0007088	regulation of mitotic nuclear division	biological_process	0.56506	1	2	2561	17	24160	gene-KI387_011930,gene-KI387_023267
GO:0051783	regulation of nuclear division	biological_process	0.56506	1	2	2561	17	24160	gene-KI387_023267,gene-KI387_011930
GO:0004064	arylesterase activity	molecular_function	0.56549	1	1	2561	7	24160	gene-KI387_017280
GO:0032465	regulation of cytokinesis	biological_process	0.5664	1	1	2561	9	24160	Novel01501
GO:0016886	ligase activity, forming phosphoric ester bonds	molecular_function	0.56684	1	3	2561	27	24160	gene-KI387_004765,gene-KI387_007380,gene-KI387_006345
GO:0004888	transmembrane signaling receptor activity	molecular_function	0.56923	1	12	2561	104	24160	gene-KI387_015465,gene-KI387_032373,gene-KI387_028491,gene-KI387_000395,gene-KI387_005794,gene-KI387_036274,gene-KI387_016526,gene-KI387_018829,gene-KI387_009471,gene-KI387_022425,gene-KI387_000406,gene-KI387_005536
GO:0010817	regulation of hormone levels	biological_process	0.56942	1	2	2561	15	24160	gene-KI387_039318,gene-KI387_018063
GO:0042445	hormone metabolic process	biological_process	0.56942	1	2	2561	15	24160	gene-KI387_018063,gene-KI387_039318
GO:0004425	indole-3-glycerol-phosphate synthase activity	molecular_function	0.57028	1	1	2561	6	24160	Novel01219
GO:0003725	double-stranded RNA binding	molecular_function	0.5712	1	1	2561	8	24160	gene-KI387_037658
GO:0034508	centromere complex assembly	biological_process	0.57138	1	6	2561	59	24160	gene-KI387_023267,Novel01918,gene-KI387_037606,gene-KI387_037271,gene-KI387_040307,Novel05264
GO:0072686	mitotic spindle	cellular_component	0.5722	1	4	2561	43	24160	gene-KI387_010870,gene-KI387_007380,gene-KI387_036893,gene-KI387_035426
GO:0043232	intracellular non-membrane-bounded organelle	cellular_component	0.57304	1	116	2561	1179	24160	gene-KI387_037723,gene-KI387_019123,gene-KI387_032632,gene-KI387_007443,gene-KI387_017028,gene-KI387_029228,gene-KI387_007380,Novel02315,gene-KI387_023267,gene-KI387_013382,gene-KI387_035361,gene-KI387_022871,gene-KI387_023688,gene-KI387_004305,gene-KI387_014896,gene-KI387_014284,gene-KI387_029628,Novel05671,gene-KI387_013619,gene-KI387_019562,Novel04289,gene-KI387_003362,gene-KI387_010795,gene-K…
GO:0043648	dicarboxylic acid metabolic process	biological_process	0.57345	1	5	2561	50	24160	gene-KI387_032801,gene-KI387_011705,gene-KI387_021590,gene-KI387_031855,gene-KI387_036183
GO:0045047	protein targeting to ER	biological_process	0.57478	1	9	2561	82	24160	gene-KI387_028330,gene-KI387_020344,gene-KI387_037686,Novel06400,gene-KI387_022631,gene-KI387_023506,gene-KI387_018299,gene-KI387_018113,gene-KI387_006314
GO:0072599	establishment of protein localization to endoplasmic reticulum	biological_process	0.57478	1	9	2561	82	24160	gene-KI387_023506,gene-KI387_018113,gene-KI387_006314,gene-KI387_018299,gene-KI387_020344,gene-KI387_028330,Novel06400,gene-KI387_022631,gene-KI387_037686
GO:0004652	polynucleotide adenylyltransferase activity	molecular_function	0.57719	1	2	2561	15	24160	gene-KI387_008557,gene-KI387_022690
GO:0004478	methionine adenosyltransferase activity	molecular_function	0.578	1	1	2561	9	24160	gene-KI387_037240
GO:0006556	S-adenosylmethionine biosynthetic process	biological_process	0.578	1	1	2561	9	24160	gene-KI387_037240
GO:0046500	S-adenosylmethionine metabolic process	biological_process	0.578	1	1	2561	9	24160	gene-KI387_037240
GO:0043605	cellular amide catabolic process	biological_process	0.57827	1	1	2561	6	24160	Novel04874
GO:0009432	SOS response	biological_process	0.57979	1	1	2561	10	24160	Novel02046
GO:0002429	immune response-activating cell surface receptor signaling pathway	biological_process	0.58046	1	1	2561	6	24160	Novel00871
GO:0002757	immune response-activating signal transduction	biological_process	0.58046	1	1	2561	6	24160	Novel00871
GO:0002764	immune response-regulating signaling pathway	biological_process	0.58046	1	1	2561	6	24160	Novel00871
GO:0002768	immune response-regulating cell surface receptor signaling pathway	biological_process	0.58046	1	1	2561	6	24160	Novel00871
GO:0050851	antigen receptor-mediated signaling pathway	biological_process	0.58046	1	1	2561	6	24160	Novel00871
GO:0008384	IkappaB kinase activity	molecular_function	0.58177	1	1	2561	6	24160	gene-KI387_016368
GO:0043169	cation binding	molecular_function	0.58185	1	343	2561	3076	24160	Novel02588,gene-KI387_039279,Novel02621,Novel00275,Novel00095,gene-KI387_040360,gene-KI387_014551,gene-KI387_005757,gene-KI387_029193,Novel03769,gene-KI387_030694,gene-KI387_013537,gene-KI387_026438,Novel03010,gene-KI387_001074,gene-KI387_019408,gene-KI387_018275,gene-KI387_001072,gene-KI387_029381,gene-KI387_023314,gene-KI387_005435,gene-KI387_037018,gene-KI387_031198,gene-KI387_014653,gene-KI38…
GO:0016756	glutathione gamma-glutamylcysteinyltransferase activity	molecular_function	0.58219	1	1	2561	7	24160	gene-KI387_013144
GO:0046937	phytochelatin metabolic process	biological_process	0.58219	1	1	2561	7	24160	gene-KI387_013144
GO:0046938	phytochelatin biosynthetic process	biological_process	0.58219	1	1	2561	7	24160	gene-KI387_013144
GO:0007154	cell communication	biological_process	0.58243	1	114	2561	1036	24160	gene-KI387_033235,gene-KI387_004226,gene-KI387_015413,Novel00871,gene-KI387_037340,Novel04574,Novel06403,Novel02256,gene-KI387_026365,gene-KI387_034734,gene-KI387_033167,gene-KI387_014859,Novel07069,gene-KI387_012888,Novel00840,gene-KI387_026442,Novel03382,gene-KI387_018123,gene-KI387_030231,Novel01099,gene-KI387_015236,gene-KI387_028292,gene-KI387_003664,gene-KI387_009479,Novel01481,gene-KI387_0…
GO:0008608	attachment of spindle microtubules to kinetochore	biological_process	0.5826	1	5	2561	53	24160	gene-KI387_035426,gene-KI387_036893,gene-KI387_007245,gene-KI387_007380,gene-KI387_010870
GO:0036452	ESCRT complex	cellular_component	0.58304	1	1	2561	7	24160	Novel05199
GO:0019209	kinase activator activity	molecular_function	0.58331	1	1	2561	10	24160	gene-KI387_011666
GO:0030295	protein kinase activator activity	molecular_function	0.58331	1	1	2561	10	24160	gene-KI387_011666
GO:0005815	microtubule organizing center	cellular_component	0.5849	1	4	2561	36	24160	gene-KI387_037606,gene-KI387_006174,gene-KI387_037271,gene-KI387_007748
GO:0004451	isocitrate lyase activity	molecular_function	0.58507	1	1	2561	7	24160	gene-KI387_013662
GO:0051262	protein tetramerization	biological_process	0.58578	1	1	2561	8	24160	gene-KI387_018686
GO:0034704	calcium channel complex	cellular_component	0.58598	1	2	2561	17	24160	gene-KI387_001899,Novel03809
GO:0006050	mannosamine metabolic process	biological_process	0.58688	1	1	2561	7	24160	Novel01219
GO:0006051	N-acetylmannosamine metabolic process	biological_process	0.58688	1	1	2561	7	24160	Novel01219
GO:0047465	N-acylglucosamine-6-phosphate 2-epimerase activity	molecular_function	0.58688	1	1	2561	7	24160	Novel01219
GO:0009664	plant-type cell wall organization	biological_process	0.58703	1	4	2561	36	24160	gene-KI387_018686,gene-KI387_025599,Novel03397,gene-KI387_029812
GO:0071669	plant-type cell wall organization or biogenesis	biological_process	0.58703	1	4	2561	36	24160	gene-KI387_025599,gene-KI387_018686,gene-KI387_029812,Novel03397
GO:0016661	oxidoreductase activity, acting on other nitrogenous compounds as donors	molecular_function	0.58716	1	1	2561	7	24160	gene-KI387_012550
GO:0098809	nitrite reductase activity	molecular_function	0.58716	1	1	2561	7	24160	gene-KI387_012550
GO:0015850	organic hydroxy compound transport	biological_process	0.58751	1	1	2561	7	24160	gene-KI387_009716
GO:0001934	positive regulation of protein phosphorylation	biological_process	0.58842	1	1	2561	7	24160	gene-KI387_034734
GO:0042327	positive regulation of phosphorylation	biological_process	0.58842	1	1	2561	7	24160	gene-KI387_034734
GO:0016125	sterol metabolic process	biological_process	0.58859	1	1	2561	8	24160	gene-KI387_013578
GO:0006750	glutathione biosynthetic process	biological_process	0.58941	1	2	2561	18	24160	gene-KI387_031734,gene-KI387_003140
GO:0009507	chloroplast	cellular_component	0.5903	1	2	2561	18	24160	gene-KI387_017370,gene-KI387_016046
GO:0009536	plastid	cellular_component	0.5903	1	2	2561	18	24160	gene-KI387_016046,gene-KI387_017370
GO:0070972	protein localization to endoplasmic reticulum	biological_process	0.59035	1	10	2561	92	24160	gene-KI387_023506,gene-KI387_018113,gene-KI387_006314,gene-KI387_018299,gene-KI387_032806,gene-KI387_020344,gene-KI387_028330,Novel06400,gene-KI387_022631,gene-KI387_037686
GO:0003989	acetyl-CoA carboxylase activity	molecular_function	0.59132	1	1	2561	7	24160	Novel00672
GO:0016421	CoA carboxylase activity	molecular_function	0.59132	1	1	2561	7	24160	Novel00672
GO:0016885	ligase activity, forming carbon-carbon bonds	molecular_function	0.59132	1	1	2561	7	24160	Novel00672
GO:0017150	tRNA dihydrouridine synthase activity	molecular_function	0.59157	1	1	2561	8	24160	Novel01219
GO:1901361	organic cyclic compound catabolic process	biological_process	0.59212	1	11	2561	101	24160	gene-KI387_002048,gene-KI387_033074,gene-KI387_024052,gene-KI387_026129,gene-KI387_012304,gene-KI387_004168,gene-KI387_016502,gene-KI387_033437,Novel04874,gene-KI387_000710,gene-KI387_012305
GO:0008410	CoA-transferase activity	molecular_function	0.5926	1	1	2561	7	24160	Novel01812
GO:0032780	negative regulation of ATPase activity	biological_process	0.59283	1	1	2561	10	24160	gene-KI387_008480
GO:0043462	regulation of ATPase activity	biological_process	0.59283	1	1	2561	10	24160	gene-KI387_008480
GO:0070851	growth factor receptor binding	molecular_function	0.59415	1	2	2561	20	24160	gene-KI387_013958,gene-KI387_032521
GO:0030880	RNA polymerase complex	cellular_component	0.59424	1	9	2561	90	24160	gene-KI387_004985,gene-KI387_006093,gene-KI387_005470,gene-KI387_023267,gene-KI387_038625,gene-KI387_027845,gene-KI387_001692,Novel00871,gene-KI387_014284
GO:0004332	fructose-bisphosphate aldolase activity	molecular_function	0.59458	1	1	2561	9	24160	gene-KI387_022767
GO:0015630	microtubule cytoskeleton	cellular_component	0.5946	1	15	2561	151	24160	gene-KI387_035426,gene-KI387_006777,gene-KI387_037271,gene-KI387_020082,gene-KI387_010870,gene-KI387_015462,gene-KI387_007245,gene-KI387_036893,gene-KI387_006174,Novel00190,gene-KI387_007748,gene-KI387_037606,gene-KI387_017028,gene-KI387_029228,gene-KI387_007380
GO:0002694	regulation of leukocyte activation	biological_process	0.59474	1	1	2561	7	24160	gene-KI387_018046
GO:0050865	regulation of cell activation	biological_process	0.59474	1	1	2561	7	24160	gene-KI387_018046
GO:0051249	regulation of lymphocyte activation	biological_process	0.59474	1	1	2561	7	24160	gene-KI387_018046
GO:0023041	neuronal signal transduction	biological_process	0.59479	1	4	2561	39	24160	gene-KI387_001692,gene-KI387_023267,gene-KI387_009479,gene-KI387_015236
GO:0008535	respiratory chain complex IV assembly	biological_process	0.59492	1	3	2561	27	24160	Novel03495,gene-KI387_031864,gene-KI387_006060
GO:0033617	mitochondrial cytochrome c oxidase assembly	biological_process	0.59492	1	3	2561	27	24160	gene-KI387_006060,gene-KI387_031864,Novel03495
GO:0098656	anion transmembrane transport	biological_process	0.59546	1	4	2561	38	24160	gene-KI387_034755,gene-KI387_039007,gene-KI387_012659,Novel02921
GO:0003849	3-deoxy-7-phosphoheptulonate synthase activity	molecular_function	0.59557	1	1	2561	7	24160	gene-KI387_022988
GO:0039526	modulation by virus of host apoptotic process	biological_process	0.5961	1	1	2561	8	24160	gene-KI387_006519
GO:0044531	modulation of programmed cell death in other organism	biological_process	0.5961	1	1	2561	8	24160	gene-KI387_006519
GO:0044532	modulation of apoptotic process in other organism	biological_process	0.5961	1	1	2561	8	24160	gene-KI387_006519
GO:0052040	modulation by symbiont of host programmed cell death	biological_process	0.5961	1	1	2561	8	24160	gene-KI387_006519
GO:0052150	modulation by symbiont of host apoptotic process	biological_process	0.5961	1	1	2561	8	24160	gene-KI387_006519
GO:0052248	modulation of programmed cell death in other organism involved in symbiotic interaction	biological_process	0.5961	1	1	2561	8	24160	gene-KI387_006519
GO:0052433	modulation by organism of apoptotic process in other organism involved in symbiotic interaction	biological_process	0.5961	1	1	2561	8	24160	gene-KI387_006519
GO:0005743	mitochondrial inner membrane	cellular_component	0.59719	1	17	2561	162	24160	gene-KI387_008350,Novel04667,Novel00407,gene-KI387_035280,gene-KI387_030923,gene-KI387_019016,gene-KI387_030547,gene-KI387_034894,gene-KI387_007472,gene-KI387_025064,Novel03495,Novel07044,Novel07069,gene-KI387_024718,gene-KI387_010752,gene-KI387_014772,gene-KI387_026485
GO:0016538	cyclin-dependent protein serine/threonine kinase regulator activity	molecular_function	0.59728	1	1	2561	8	24160	Novel00793
GO:0000774	adenyl-nucleotide exchange factor activity	molecular_function	0.59777	1	2	2561	18	24160	Novel05551,gene-KI387_022201
GO:0043647	inositol phosphate metabolic process	biological_process	0.5979	1	1	2561	9	24160	gene-KI387_019509
GO:0071107	response to parathyroid hormone	biological_process	0.59827	1	1	2561	8	24160	Novel03716
GO:0016702	oxidoreductase activity, acting on single donors with incorporation of molecular oxygen, incorporation of two atoms of oxygen	molecular_function	0.60043	1	14	2561	152	24160	gene-KI387_019429,gene-KI387_000079,gene-KI387_013454,gene-KI387_005436,gene-KI387_013537,gene-KI387_001615,gene-KI387_031172,gene-KI387_000339,gene-KI387_031130,gene-KI387_007094,Novel05915,gene-KI387_031129,gene-KI387_030330,gene-KI387_019526
GO:0000175	3-5-exoribonuclease activity	molecular_function	0.60049	1	1	2561	8	24160	gene-KI387_000710
GO:0004535	poly(A)-specific ribonuclease activity	molecular_function	0.60049	1	1	2561	8	24160	gene-KI387_000710
GO:0016054	organic acid catabolic process	biological_process	0.60151	1	5	2561	46	24160	gene-KI387_016407,gene-KI387_039315,gene-KI387_016502,gene-KI387_012304,gene-KI387_012305
GO:0046395	carboxylic acid catabolic process	biological_process	0.60151	1	5	2561	46	24160	gene-KI387_039315,gene-KI387_016407,gene-KI387_012305,gene-KI387_016502,gene-KI387_012304
GO:0005643	nuclear pore	cellular_component	0.60278	1	3	2561	26	24160	gene-KI387_035890,gene-KI387_017178,gene-KI387_033331
GO:0019069	viral capsid assembly	biological_process	0.60288	1	3	2561	30	24160	gene-KI387_014305,gene-KI387_010321,gene-KI387_032119
GO:0007586	digestion	biological_process	0.60342	1	2	2561	18	24160	gene-KI387_023131,gene-KI387_038064
GO:0043269	regulation of ion transport	biological_process	0.60345	1	3	2561	27	24160	Novel03614,gene-KI387_009714,gene-KI387_018247
GO:0017119	Golgi transport complex	cellular_component	0.60376	1	3	2561	29	24160	gene-KI387_005492,gene-KI387_034458,gene-KI387_000912
GO:0004402	histone acetyltransferase activity	molecular_function	0.60416	1	2	2561	16	24160	gene-KI387_005437,Novel00922
GO:0034212	peptide N-acetyltransferase activity	molecular_function	0.60416	1	2	2561	16	24160	gene-KI387_005437,Novel00922
GO:0061733	peptide-lysine-N-acetyltransferase activity	molecular_function	0.60416	1	2	2561	16	24160	Novel00922,gene-KI387_005437
GO:0003830	beta-1,4-mannosylglycoprotein 4-beta-N-acetylglucosaminyltransferase activity	molecular_function	0.60438	1	1	2561	7	24160	gene-KI387_014123
GO:0044772	mitotic cell cycle phase transition	biological_process	0.6052	1	2	2561	18	24160	gene-KI387_023267,gene-KI387_011930
GO:1901990	regulation of mitotic cell cycle phase transition	biological_process	0.6052	1	2	2561	18	24160	gene-KI387_023267,gene-KI387_011930
GO:0022804	active transmembrane transporter activity	molecular_function	0.60528	1	39	2561	344	24160	gene-KI387_025520,gene-KI387_027439,gene-KI387_012774,gene-KI387_020615,gene-KI387_009488,gene-KI387_012777,gene-KI387_004972,gene-KI387_005377,gene-KI387_039308,Novel01818,gene-KI387_006587,gene-KI387_008030,gene-KI387_010262,gene-KI387_015139,gene-KI387_028126,gene-KI387_003318,Novel04376,gene-KI387_010320,gene-KI387_038848,gene-KI387_033209,Novel02633,gene-KI387_030438,Novel03338,gene-KI387_00…
GO:0016226	iron-sulfur cluster assembly	biological_process	0.60567	1	2	2561	18	24160	Novel05423,gene-KI387_022421
GO:0031163	metallo-sulfur cluster assembly	biological_process	0.60567	1	2	2561	18	24160	gene-KI387_022421,Novel05423
GO:0044260	cellular macromolecule metabolic process	biological_process	0.60577	1	662	2561	6112	24160	gene-KI387_010322,gene-KI387_005787,gene-KI387_010320,gene-KI387_010591,Novel01543,gene-KI387_034602,Novel03176,gene-KI387_028802,gene-KI387_007094,gene-KI387_031774,gene-KI387_025413,Novel02843,gene-KI387_024637,Novel01986,Novel05555,gene-KI387_025872,Novel00888,gene-KI387_007111,gene-KI387_037467,gene-KI387_014965,gene-KI387_009418,gene-KI387_031841,gene-KI387_017599,gene-KI387_018259,gene-KI38…
GO:0046434	organophosphate catabolic process	biological_process	0.60586	1	4	2561	40	24160	gene-KI387_002048,gene-KI387_030645,gene-KI387_014285,gene-KI387_004168
GO:0004556	alpha-amylase activity	molecular_function	0.60676	1	1	2561	7	24160	Novel03375
GO:0005047	signal recognition particle binding	molecular_function	0.60798	1	1	2561	9	24160	gene-KI387_028330
GO:0016755	transferase activity, transferring amino-acyl groups	molecular_function	0.60806	1	3	2561	27	24160	gene-KI387_035271,gene-KI387_013144,gene-KI387_018341
GO:0032501	multicellular organismal process	biological_process	0.60833	1	55	2561	543	24160	gene-KI387_037606,gene-KI387_035742,Novel00295,gene-KI387_034734,Novel03387,Novel06191,Novel06403,gene-KI387_024614,gene-KI387_032427,gene-KI387_012030,gene-KI387_038064,Novel02622,Novel05925,gene-KI387_034072,Novel01337,Novel02718,Novel06519,gene-KI387_034697,gene-KI387_028341,Novel00672,Novel04039,Novel03073,gene-KI387_008526,gene-KI387_007245,Novel06233,Novel01099,gene-KI387_007739,Novel06404,…
GO:0009719	response to endogenous stimulus	biological_process	0.60845	1	9	2561	92	24160	gene-KI387_019459,Novel03716,gene-KI387_035508,gene-KI387_026607,gene-KI387_017240,gene-KI387_016635,gene-KI387_024347,gene-KI387_004191,gene-KI387_039891
GO:0007094	mitotic spindle assembly checkpoint	biological_process	0.60851	1	1	2561	10	24160	gene-KI387_023267
GO:0031577	spindle checkpoint	biological_process	0.60851	1	1	2561	10	24160	gene-KI387_023267
GO:0033046	negative regulation of sister chromatid segregation	biological_process	0.60851	1	1	2561	10	24160	gene-KI387_023267
GO:0033048	negative regulation of mitotic sister chromatid segregation	biological_process	0.60851	1	1	2561	10	24160	gene-KI387_023267
GO:0045839	negative regulation of mitotic nuclear division	biological_process	0.60851	1	1	2561	10	24160	gene-KI387_023267
GO:0045841	negative regulation of mitotic metaphase/anaphase transition	biological_process	0.60851	1	1	2561	10	24160	gene-KI387_023267
GO:0051784	negative regulation of nuclear division	biological_process	0.60851	1	1	2561	10	24160	gene-KI387_023267
GO:0051985	negative regulation of chromosome segregation	biological_process	0.60851	1	1	2561	10	24160	gene-KI387_023267
GO:0071173	spindle assembly checkpoint	biological_process	0.60851	1	1	2561	10	24160	gene-KI387_023267
GO:0071174	mitotic spindle checkpoint	biological_process	0.60851	1	1	2561	10	24160	gene-KI387_023267
GO:1902100	negative regulation of metaphase/anaphase transition of cell cycle	biological_process	0.60851	1	1	2561	10	24160	gene-KI387_023267
GO:1905819	negative regulation of chromosome separation	biological_process	0.60851	1	1	2561	10	24160	gene-KI387_023267
GO:2000816	negative regulation of mitotic sister chromatid separation	biological_process	0.60851	1	1	2561	10	24160	gene-KI387_023267
GO:0001932	regulation of protein phosphorylation	biological_process	0.60859	1	3	2561	27	24160	gene-KI387_034734,Novel00380,Novel02869
GO:0030154	cell differentiation	biological_process	0.60945	1	11	2561	108	24160	gene-KI387_016967,Novel03765,gene-KI387_008680,gene-KI387_016369,Novel02678,gene-KI387_031230,gene-KI387_031514,Novel06191,gene-KI387_028341,gene-KI387_035742,gene-KI387_028521
GO:0048869	cellular developmental process	biological_process	0.60945	1	11	2561	108	24160	gene-KI387_016369,Novel02678,gene-KI387_008680,gene-KI387_016967,Novel03765,gene-KI387_028521,gene-KI387_028341,gene-KI387_035742,gene-KI387_031514,Novel06191,gene-KI387_031230
GO:0017056	structural constituent of nuclear pore	molecular_function	0.61083	1	2	2561	17	24160	gene-KI387_035890,gene-KI387_017178
GO:0005929	cilium	cellular_component	0.61094	1	6	2561	55	24160	gene-KI387_030934,gene-KI387_023268,gene-KI387_035557,gene-KI387_009130,gene-KI387_001899,gene-KI387_023267
GO:0005996	monosaccharide metabolic process	biological_process	0.61108	1	9	2561	84	24160	gene-KI387_020344,Novel06053,gene-KI387_005106,Novel05913,gene-KI387_017746,gene-KI387_024158,gene-KI387_004546,gene-KI387_010870,gene-KI387_038701
GO:0061024	membrane organization	biological_process	0.61108	1	9	2561	89	24160	gene-KI387_037588,gene-KI387_035402,gene-KI387_036274,gene-KI387_005866,gene-KI387_001899,gene-KI387_006186,gene-KI387_026264,gene-KI387_026064,gene-KI387_000475
GO:0140352	export from cell	biological_process	0.6111	1	14	2561	129	24160	gene-KI387_008667,gene-KI387_010395,Novel02607,Novel01492,gene-KI387_025888,gene-KI387_037271,gene-KI387_029896,gene-KI387_014387,Novel03955,gene-KI387_004864,gene-KI387_006619,gene-KI387_028938,gene-KI387_034458,gene-KI387_020139
GO:0007600	sensory perception	biological_process	0.61225	1	3	2561	28	24160	Novel06404,gene-KI387_009471,Novel06403
GO:0050877	nervous system process	biological_process	0.61225	1	3	2561	28	24160	Novel06404,gene-KI387_009471,Novel06403
GO:0003887	DNA-directed DNA polymerase activity	molecular_function	0.61303	1	6	2561	55	24160	gene-KI387_031483,gene-KI387_008489,Novel02398,gene-KI387_010354,gene-KI387_026868,Novel03474
GO:0001501	skeletal system development	biological_process	0.61335	1	1	2561	7	24160	gene-KI387_009714
GO:0051216	cartilage development	biological_process	0.61335	1	1	2561	7	24160	gene-KI387_009714
GO:0061448	connective tissue development	biological_process	0.61335	1	1	2561	7	24160	gene-KI387_009714
GO:0019203	carbohydrate phosphatase activity	molecular_function	0.61336	1	1	2561	7	24160	gene-KI387_010870
GO:0050308	sugar-phosphatase activity	molecular_function	0.61336	1	1	2561	7	24160	gene-KI387_010870
GO:0009538	photosystem I reaction center	cellular_component	0.61375	1	1	2561	8	24160	gene-KI387_005309
GO:0006605	protein targeting	biological_process	0.61531	1	14	2561	132	24160	gene-KI387_026485,gene-KI387_037686,gene-KI387_022631,Novel03171,Novel06400,gene-KI387_011006,gene-KI387_009464,gene-KI387_028330,gene-KI387_020344,gene-KI387_018299,gene-KI387_006314,gene-KI387_018113,gene-KI387_036235,gene-KI387_023506
GO:0009889	regulation of biosynthetic process	biological_process	0.61612	1	198	2561	1799	24160	gene-KI387_018974,gene-KI387_010311,gene-KI387_034627,gene-KI387_039308,gene-KI387_030920,Novel03705,gene-KI387_027969,gene-KI387_020391,gene-KI387_007687,Novel05085,gene-KI387_016790,gene-KI387_029193,gene-KI387_005757,gene-KI387_012217,gene-KI387_007975,gene-KI387_001414,gene-KI387_031983,gene-KI387_012823,gene-KI387_010321,Novel00136,gene-KI387_027652,Novel01918,gene-KI387_002879,gene-KI387_03…
GO:0010556	regulation of macromolecule biosynthetic process	biological_process	0.61612	1	198	2561	1799	24160	gene-KI387_036306,gene-KI387_028819,gene-KI387_043970,gene-KI387_001195,gene-KI387_010305,gene-KI387_014464,gene-KI387_027425,gene-KI387_029221,Novel02780,gene-KI387_008908,gene-KI387_001399,gene-KI387_008084,gene-KI387_014527,gene-KI387_007502,Novel04888,gene-KI387_030918,gene-KI387_033785,gene-KI387_008489,gene-KI387_010310,gene-KI387_020071,gene-KI387_032179,gene-KI387_036653,gene-KI387_038717…
GO:0031326	regulation of cellular biosynthetic process	biological_process	0.61612	1	198	2561	1799	24160	gene-KI387_036722,gene-KI387_035829,gene-KI387_003873,gene-KI387_013619,gene-KI387_037173,gene-KI387_028558,gene-KI387_006674,gene-KI387_035402,gene-KI387_029522,gene-KI387_030611,gene-KI387_037234,gene-KI387_001181,gene-KI387_021610,gene-KI387_023506,gene-KI387_003207,gene-KI387_042138,gene-KI387_029228,Novel05846,gene-KI387_037434,Novel01991,gene-KI387_036170,gene-KI387_002173,gene-KI387_036076…
GO:2000112	regulation of cellular macromolecule biosynthetic process	biological_process	0.61612	1	198	2561	1799	24160	gene-KI387_009116,Novel05031,gene-KI387_012164,Novel04342,gene-KI387_035939,gene-KI387_032178,gene-KI387_016982,Novel02425,gene-KI387_026607,gene-KI387_023267,Novel02315,gene-KI387_001185,gene-KI387_017437,gene-KI387_001176,gene-KI387_009135,gene-KI387_039337,gene-KI387_029628,gene-KI387_017137,gene-KI387_039891,Novel05628,gene-KI387_014871,gene-KI387_022545,gene-KI387_001182,gene-KI387_019578,ge…
GO:0009521	photosystem	cellular_component	0.6162	1	13	2561	120	24160	Novel07116,Novel01102,gene-KI387_029490,gene-KI387_018785,gene-KI387_018567,gene-KI387_021633,gene-KI387_025413,gene-KI387_029489,gene-KI387_032850,gene-KI387_005309,Novel00947,gene-KI387_023155,Novel00843
GO:0004869	cysteine-type endopeptidase inhibitor activity	molecular_function	0.61664	1	1	2561	12	24160	gene-KI387_022145
GO:0039674	exit of virus from host cell nucleus	biological_process	0.61766	1	1	2561	8	24160	gene-KI387_019070
GO:0046755	viral budding	biological_process	0.61766	1	1	2561	8	24160	gene-KI387_019070
GO:0046765	viral budding from nuclear membrane	biological_process	0.61766	1	1	2561	8	24160	gene-KI387_019070
GO:0046802	exit of virus from host cell nucleus by nuclear egress	biological_process	0.61766	1	1	2561	8	24160	gene-KI387_019070
GO:0033365	protein localization to organelle	biological_process	0.61792	1	19	2561	178	24160	gene-KI387_022631,gene-KI387_028819,Novel03171,Novel06400,gene-KI387_037686,gene-KI387_023267,gene-KI387_005866,gene-KI387_011006,gene-KI387_018113,gene-KI387_023268,gene-KI387_018299,gene-KI387_032806,gene-KI387_023506,gene-KI387_026485,gene-KI387_020344,gene-KI387_028330,gene-KI387_006314,gene-KI387_037271,gene-KI387_036235
GO:0030076	light-harvesting complex	cellular_component	0.61868	1	2	2561	19	24160	gene-KI387_028802,gene-KI387_004620
GO:0099081	supramolecular polymer	cellular_component	0.61882	1	4	2561	43	24160	gene-KI387_013451,gene-KI387_017619,gene-KI387_007245,gene-KI387_024647
GO:0099512	supramolecular fiber	cellular_component	0.61882	1	4	2561	43	24160	gene-KI387_017619,gene-KI387_007245,gene-KI387_013451,gene-KI387_024647
GO:0061640	cytoskeleton-dependent cytokinesis	biological_process	0.61929	1	1	2561	8	24160	gene-KI387_020082
GO:0044409	entry into host	biological_process	0.61935	1	3	2561	31	24160	gene-KI387_001899,gene-KI387_035402,gene-KI387_037588
GO:0046718	viral entry into host cell	biological_process	0.61935	1	3	2561	31	24160	gene-KI387_001899,gene-KI387_035402,gene-KI387_037588
GO:0022411	cellular component disassembly	biological_process	0.61958	1	4	2561	40	24160	gene-KI387_036196,gene-KI387_028564,gene-KI387_028567,gene-KI387_001057
GO:0032984	protein-containing complex disassembly	biological_process	0.61958	1	4	2561	40	24160	gene-KI387_001057,gene-KI387_036196,gene-KI387_028567,gene-KI387_028564
GO:0001514	selenocysteine incorporation	biological_process	0.62127	1	1	2561	8	24160	gene-KI387_029237
GO:0006451	translational readthrough	biological_process	0.62127	1	1	2561	8	24160	gene-KI387_029237
GO:0007631	feeding behavior	biological_process	0.62131	1	1	2561	9	24160	gene-KI387_034734
GO:0046872	metal ion binding	molecular_function	0.62224	1	338	2561	3047	24160	Novel06930,gene-KI387_002440,gene-KI387_004288,Novel05168,gene-KI387_038854,gene-KI387_007472,gene-KI387_014582,gene-KI387_035502,Novel00234,gene-KI387_002379,gene-KI387_026055,gene-KI387_043176,gene-KI387_035983,Novel00922,gene-KI387_016060,gene-KI387_036488,gene-KI387_028576,gene-KI387_010752,gene-KI387_031205,Novel00519,gene-KI387_026089,gene-KI387_006194,gene-KI387_043617,gene-KI387_003956,ge…
GO:0036128	CatSper complex	cellular_component	0.6223	1	1	2561	7	24160	gene-KI387_001899
GO:0016634	oxidoreductase activity, acting on the CH-CH group of donors, oxygen as acceptor	molecular_function	0.62299	1	1	2561	8	24160	gene-KI387_039315
GO:0034703	cation channel complex	cellular_component	0.62301	1	2	2561	18	24160	gene-KI387_001899,Novel03809
GO:0004743	pyruvate kinase activity	molecular_function	0.6248	1	2	2561	21	24160	gene-KI387_035754,gene-KI387_035983
GO:0120009	intermembrane lipid transfer	biological_process	0.62536	1	1	2561	9	24160	gene-KI387_000475
GO:0120013	lipid transfer activity	molecular_function	0.62536	1	1	2561	9	24160	gene-KI387_000475
GO:0120025	plasma membrane bounded cell projection	cellular_component	0.62731	1	6	2561	56	24160	gene-KI387_009130,gene-KI387_030934,gene-KI387_023268,gene-KI387_035557,gene-KI387_001899,gene-KI387_023267
GO:0048513	animal organ development	biological_process	0.62792	1	4	2561	40	24160	gene-KI387_024614,gene-KI387_007216,Novel06191,gene-KI387_009714
GO:0005944	phosphatidylinositol 3-kinase complex, class IB	cellular_component	0.62846	1	1	2561	11	24160	gene-KI387_006314
GO:0035014	phosphatidylinositol 3-kinase regulator activity	molecular_function	0.62846	1	1	2561	11	24160	gene-KI387_006314
GO:0046935	1-phosphatidylinositol-3-kinase regulator activity	molecular_function	0.62846	1	1	2561	11	24160	gene-KI387_006314
GO:0097651	phosphatidylinositol 3-kinase complex, class I	cellular_component	0.62846	1	1	2561	11	24160	gene-KI387_006314
GO:0022836	gated channel activity	molecular_function	0.62876	1	15	2561	136	24160	Novel03745,gene-KI387_009627,gene-KI387_017651,gene-KI387_014644,gene-KI387_018829,gene-KI387_033235,gene-KI387_027972,gene-KI387_000406,gene-KI387_007805,gene-KI387_021973,Novel03809,gene-KI387_030556,gene-KI387_013451,Novel01687,gene-KI387_000395
GO:0006515	protein quality control for misfolded or incompletely synthesized proteins	biological_process	0.62881	1	1	2561	7	24160	Novel03376
GO:0031144	proteasome localization	biological_process	0.62881	1	1	2561	7	24160	Novel03376
GO:0035967	cellular response to topologically incorrect protein	biological_process	0.62881	1	1	2561	7	24160	Novel03376
GO:0051788	response to misfolded protein	biological_process	0.62881	1	1	2561	7	24160	Novel03376
GO:0071218	cellular response to misfolded protein	biological_process	0.62881	1	1	2561	7	24160	Novel03376
GO:0071630	nuclear protein quality control by the ubiquitin-proteasome system	biological_process	0.62881	1	1	2561	7	24160	Novel03376
GO:0006004	fucose metabolic process	biological_process	0.62889	1	1	2561	7	24160	gene-KI387_005106
GO:0008736	L-fucose isomerase activity	molecular_function	0.62889	1	1	2561	7	24160	gene-KI387_005106
GO:0004197	cysteine-type endopeptidase activity	molecular_function	0.62993	1	12	2561	112	24160	Novel03707,gene-KI387_030330,gene-KI387_024037,gene-KI387_020058,gene-KI387_022277,Novel06683,gene-KI387_010087,gene-KI387_015251,gene-KI387_016060,Novel00649,gene-KI387_020503,gene-KI387_011036
GO:0006360	transcription by RNA polymerase I	biological_process	0.62994	1	1	2561	10	24160	gene-KI387_020139
GO:0006606	protein import into nucleus	biological_process	0.63024	1	4	2561	38	24160	gene-KI387_023268,gene-KI387_028819,gene-KI387_037271,gene-KI387_023267
GO:0034504	protein localization to nucleus	biological_process	0.63024	1	4	2561	38	24160	gene-KI387_023268,gene-KI387_028819,gene-KI387_037271,gene-KI387_023267
GO:0051170	import into nucleus	biological_process	0.63024	1	4	2561	38	24160	gene-KI387_023267,gene-KI387_028819,gene-KI387_023268,gene-KI387_037271
GO:0000940	condensed chromosome outer kinetochore	cellular_component	0.63173	1	5	2561	56	24160	gene-KI387_010870,gene-KI387_007380,gene-KI387_007245,gene-KI387_036893,gene-KI387_035426
GO:0000942	condensed nuclear chromosome outer kinetochore	cellular_component	0.63173	1	5	2561	56	24160	gene-KI387_010870,gene-KI387_007380,gene-KI387_007245,gene-KI387_036893,gene-KI387_035426
GO:0005819	spindle	cellular_component	0.63173	1	5	2561	56	24160	gene-KI387_007245,gene-KI387_036893,gene-KI387_035426,gene-KI387_010870,gene-KI387_007380
GO:0042729	DASH complex	cellular_component	0.63173	1	5	2561	56	24160	gene-KI387_035426,gene-KI387_007245,gene-KI387_036893,gene-KI387_007380,gene-KI387_010870
GO:0010564	regulation of cell cycle process	biological_process	0.63226	1	3	2561	30	24160	gene-KI387_023267,Novel01501,gene-KI387_011930
GO:0009975	cyclase activity	molecular_function	0.63412	1	1	2561	11	24160	Novel05887
GO:0016706	2-oxoglutarate-dependent dioxygenase activity	molecular_function	0.63599	1	3	2561	32	24160	gene-KI387_019429,gene-KI387_035915,Novel00843
GO:0022610	biological adhesion	biological_process	0.63625	1	12	2561	114	24160	Novel01505,gene-KI387_023996,Novel05922,Novel01428,gene-KI387_020503,gene-KI387_037606,gene-KI387_018046,gene-KI387_037240,gene-KI387_023268,gene-KI387_016721,gene-KI387_035593,Novel03866
GO:0009166	nucleotide catabolic process	biological_process	0.6374	1	1	2561	10	24160	gene-KI387_002048
GO:0000154	rRNA modification	biological_process	0.63898	1	1	2561	8	24160	gene-KI387_019145
GO:0016435	rRNA (guanine) methyltransferase activity	molecular_function	0.63898	1	1	2561	8	24160	gene-KI387_019145
GO:0031167	rRNA methylation	biological_process	0.63898	1	1	2561	8	24160	gene-KI387_019145
GO:0031325	positive regulation of cellular metabolic process	biological_process	0.63985	1	8	2561	79	24160	gene-KI387_000263,gene-KI387_019578,Novel00136,gene-KI387_039861,gene-KI387_021598,gene-KI387_009252,gene-KI387_034734,gene-KI387_003664
GO:0051173	positive regulation of nitrogen compound metabolic process	biological_process	0.63985	1	8	2561	79	24160	gene-KI387_009252,gene-KI387_021598,gene-KI387_003664,gene-KI387_034734,Novel00136,gene-KI387_019578,gene-KI387_039861,gene-KI387_000263
GO:0048878	chemical homeostasis	biological_process	0.64005	1	6	2561	62	24160	gene-KI387_033235,Novel03745,Novel01687,gene-KI387_002162,gene-KI387_030057,gene-KI387_021973
GO:0010277	chlorophyllide a oxygenase [overall] activity	molecular_function	0.64043	1	1	2561	7	24160	gene-KI387_000255
GO:0019866	organelle inner membrane	cellular_component	0.64162	1	17	2561	168	24160	gene-KI387_034894,gene-KI387_025064,gene-KI387_007472,gene-KI387_030923,gene-KI387_019016,gene-KI387_030547,Novel00407,Novel04667,gene-KI387_035280,gene-KI387_008350,gene-KI387_010752,gene-KI387_026485,gene-KI387_014772,Novel07069,Novel07044,gene-KI387_024718,Novel03495
GO:0003885	D-arabinono-1,4-lactone oxidase activity	molecular_function	0.64172	1	3	2561	25	24160	gene-KI387_017781,gene-KI387_035541,Novel03006
GO:0016899	oxidoreductase activity, acting on the CH-OH group of donors, oxygen as acceptor	molecular_function	0.64172	1	3	2561	25	24160	gene-KI387_017781,gene-KI387_035541,Novel03006
GO:0051087	chaperone binding	molecular_function	0.64363	1	4	2561	40	24160	gene-KI387_030831,gene-KI387_018510,gene-KI387_024052,gene-KI387_022201
GO:0033013	tetrapyrrole metabolic process	biological_process	0.64421	1	12	2561	119	24160	gene-KI387_026259,gene-KI387_022362,gene-KI387_011587,gene-KI387_027652,gene-KI387_036227,gene-KI387_037212,Novel05750,gene-KI387_030750,gene-KI387_011705,gene-KI387_034742,gene-KI387_031026,gene-KI387_033741
GO:0006006	glucose metabolic process	biological_process	0.64443	1	3	2561	27	24160	gene-KI387_010870,gene-KI387_038701,gene-KI387_024158
GO:0010562	positive regulation of phosphorus metabolic process	biological_process	0.64464	1	1	2561	8	24160	gene-KI387_034734
GO:0031401	positive regulation of protein modification process	biological_process	0.64464	1	1	2561	8	24160	gene-KI387_034734
GO:0045937	positive regulation of phosphate metabolic process	biological_process	0.64464	1	1	2561	8	24160	gene-KI387_034734
GO:0030042	actin filament depolymerization	biological_process	0.64568	1	1	2561	10	24160	gene-KI387_001057
GO:0030834	regulation of actin filament depolymerization	biological_process	0.64568	1	1	2561	10	24160	gene-KI387_001057
GO:0030835	negative regulation of actin filament depolymerization	biological_process	0.64568	1	1	2561	10	24160	gene-KI387_001057
GO:0030837	negative regulation of actin filament polymerization	biological_process	0.64568	1	1	2561	10	24160	gene-KI387_001057
GO:0031333	negative regulation of protein-containing complex assembly	biological_process	0.64568	1	1	2561	10	24160	gene-KI387_001057
GO:0032272	negative regulation of protein polymerization	biological_process	0.64568	1	1	2561	10	24160	gene-KI387_001057
GO:0051016	barbed-end actin filament capping	biological_process	0.64568	1	1	2561	10	24160	gene-KI387_001057
GO:0051261	protein depolymerization	biological_process	0.64568	1	1	2561	10	24160	gene-KI387_001057
GO:0051494	negative regulation of cytoskeleton organization	biological_process	0.64568	1	1	2561	10	24160	gene-KI387_001057
GO:0051693	actin filament capping	biological_process	0.64568	1	1	2561	10	24160	gene-KI387_001057
GO:1901879	regulation of protein depolymerization	biological_process	0.64568	1	1	2561	10	24160	gene-KI387_001057
GO:1901880	negative regulation of protein depolymerization	biological_process	0.64568	1	1	2561	10	24160	gene-KI387_001057
GO:1902904	negative regulation of supramolecular fiber organization	biological_process	0.64568	1	1	2561	10	24160	gene-KI387_001057
GO:0046700	heterocycle catabolic process	biological_process	0.64584	1	10	2561	95	24160	gene-KI387_012305,gene-KI387_000710,Novel04874,gene-KI387_033437,gene-KI387_004168,gene-KI387_012304,gene-KI387_026129,gene-KI387_033074,gene-KI387_024052,gene-KI387_002048
GO:0006814	sodium ion transport	biological_process	0.64678	1	4	2561	37	24160	gene-KI387_020139,gene-KI387_015139,gene-KI387_004864,gene-KI387_018341
GO:0030286	dynein complex	cellular_component	0.64785	1	2	2561	19	24160	Novel00190,gene-KI387_015462
GO:1990234	transferase complex	cellular_component	0.64985	1	41	2561	384	24160	gene-KI387_001692,gene-KI387_024960,gene-KI387_027845,gene-KI387_024959,gene-KI387_003256,gene-KI387_011450,Novel00309,gene-KI387_031027,gene-KI387_004985,gene-KI387_011930,Novel00871,Novel01813,gene-KI387_016879,gene-KI387_030057,gene-KI387_008489,gene-KI387_032203,gene-KI387_024922,gene-KI387_006093,Novel00217,gene-KI387_024485,Novel04702,Novel04609,Novel06930,gene-KI387_027813,gene-KI387_00110…
GO:0019207	kinase regulator activity	molecular_function	0.65228	1	4	2561	43	24160	gene-KI387_011666,gene-KI387_015474,gene-KI387_006314,Novel00793
GO:0008192	RNA guanylyltransferase activity	molecular_function	0.65412	1	1	2561	9	24160	gene-KI387_023692
GO:0007346	regulation of mitotic cell cycle	biological_process	0.65466	1	2	2561	20	24160	gene-KI387_023267,gene-KI387_011930
GO:0005942	phosphatidylinositol 3-kinase complex	cellular_component	0.65634	1	1	2561	12	24160	gene-KI387_006314
GO:0045333	cellular respiration	biological_process	0.65727	1	9	2561	91	24160	Novel07044,Novel06401,gene-KI387_038848,gene-KI387_007472,Novel00184,gene-KI387_015818,Novel04127,Novel03043,gene-KI387_005815
GO:0014065	phosphatidylinositol 3-kinase signaling	biological_process	0.65729	1	1	2561	9	24160	gene-KI387_034371
GO:0014066	regulation of phosphatidylinositol 3-kinase signaling	biological_process	0.65729	1	1	2561	9	24160	gene-KI387_034371
GO:0014068	positive regulation of phosphatidylinositol 3-kinase signaling	biological_process	0.65729	1	1	2561	9	24160	gene-KI387_034371
GO:0043548	phosphatidylinositol 3-kinase binding	molecular_function	0.65729	1	1	2561	9	24160	gene-KI387_034371
GO:0048015	phosphatidylinositol-mediated signaling	biological_process	0.65729	1	1	2561	9	24160	gene-KI387_034371
GO:0048017	inositol lipid-mediated signaling	biological_process	0.65729	1	1	2561	9	24160	gene-KI387_034371
GO:1902494	catalytic complex	cellular_component	0.65778	1	67	2561	625	24160	Novel01813,Novel00871,gene-KI387_015462,gene-KI387_011930,gene-KI387_013081,gene-KI387_008489,Novel00190,gene-KI387_027845,gene-KI387_006900,Novel04667,gene-KI387_037885,Novel00309,gene-KI387_003256,gene-KI387_027425,gene-KI387_021849,gene-KI387_006194,Novel07451,gene-KI387_023862,Novel05264,Novel07044,gene-KI387_014214,gene-KI387_024485,gene-KI387_034693,Novel04702,gene-KI387_035693,gene-KI387_0…
GO:0072524	pyridine-containing compound metabolic process	biological_process	0.66068	1	3	2561	28	24160	gene-KI387_018123,Novel05342,gene-KI387_022362
GO:0072525	pyridine-containing compound biosynthetic process	biological_process	0.66068	1	3	2561	28	24160	gene-KI387_018123,Novel05342,gene-KI387_022362
GO:0006613	cotranslational protein targeting to membrane	biological_process	0.66102	1	7	2561	70	24160	gene-KI387_023506,gene-KI387_020344,gene-KI387_028330,gene-KI387_018113,gene-KI387_022631,gene-KI387_037686,gene-KI387_018299
GO:0006614	SRP-dependent cotranslational protein targeting to membrane	biological_process	0.66102	1	7	2561	70	24160	gene-KI387_028330,gene-KI387_020344,gene-KI387_023506,gene-KI387_018299,gene-KI387_037686,gene-KI387_018113,gene-KI387_022631
GO:0008299	isoprenoid biosynthetic process	biological_process	0.66112	1	4	2561	39	24160	gene-KI387_039159,gene-KI387_034266,gene-KI387_004306,gene-KI387_016961
GO:0010948	negative regulation of cell cycle process	biological_process	0.66199	1	1	2561	11	24160	gene-KI387_023267
GO:1901988	negative regulation of cell cycle phase transition	biological_process	0.66199	1	1	2561	11	24160	gene-KI387_023267
GO:1901991	negative regulation of mitotic cell cycle phase transition	biological_process	0.66199	1	1	2561	11	24160	gene-KI387_023267
GO:0051607	defense response to virus	biological_process	0.66226	1	3	2561	33	24160	gene-KI387_023268,gene-KI387_028249,gene-KI387_003051
GO:0071586	CAAX-box protein processing	biological_process	0.66228	1	1	2561	9	24160	gene-KI387_010087
GO:0080120	CAAX-box protein maturation	biological_process	0.66228	1	1	2561	9	24160	gene-KI387_010087
GO:0042325	regulation of phosphorylation	biological_process	0.66308	1	3	2561	29	24160	Novel02869,Novel00380,gene-KI387_034734
GO:0019068	virion assembly	biological_process	0.66405	1	7	2561	74	24160	gene-KI387_032119,gene-KI387_020344,Novel00152,gene-KI387_010321,gene-KI387_019070,gene-KI387_014305,Novel04070
GO:0000375	RNA splicing, via transesterification reactions	biological_process	0.66619	1	7	2561	70	24160	gene-KI387_018275,gene-KI387_023612,gene-KI387_026449,gene-KI387_026888,gene-KI387_006674,gene-KI387_027918,gene-KI387_013505
GO:0070603	SWI/SNF superfamily-type complex	cellular_component	0.66627	1	1	2561	8	24160	gene-KI387_013081
GO:0051235	maintenance of location	biological_process	0.66701	1	2	2561	21	24160	Novel03071,gene-KI387_032806
GO:0015294	solute:cation symporter activity	molecular_function	0.66881	1	1	2561	8	24160	gene-KI387_018341
GO:0043385	mycotoxin metabolic process	biological_process	0.66944	1	1	2561	10	24160	Novel02052
GO:0043386	mycotoxin biosynthetic process	biological_process	0.66944	1	1	2561	10	24160	Novel02052
GO:0030261	chromosome condensation	biological_process	0.67075	1	1	2561	8	24160	gene-KI387_039694
GO:0004357	glutamate-cysteine ligase activity	molecular_function	0.6708	1	1	2561	9	24160	gene-KI387_003140
GO:0052126	movement in host environment	biological_process	0.67167	1	8	2561	89	24160	gene-KI387_006777,gene-KI387_001899,gene-KI387_017791,Novel05701,Novel00510,gene-KI387_037588,gene-KI387_035402,Novel04217
GO:0035966	response to topologically incorrect protein	biological_process	0.67216	1	1	2561	9	24160	Novel03376
GO:0009267	cellular response to starvation	biological_process	0.67246	1	2	2561	21	24160	gene-KI387_033235,gene-KI387_034734
GO:0031667	response to nutrient levels	biological_process	0.67246	1	2	2561	21	24160	gene-KI387_034734,gene-KI387_033235
GO:0031669	cellular response to nutrient levels	biological_process	0.67246	1	2	2561	21	24160	gene-KI387_034734,gene-KI387_033235
GO:0042594	response to starvation	biological_process	0.67246	1	2	2561	21	24160	gene-KI387_034734,gene-KI387_033235
GO:0031514	motile cilium	cellular_component	0.67257	1	4	2561	39	24160	gene-KI387_001899,gene-KI387_030934,gene-KI387_023268,gene-KI387_023267
GO:0017038	protein import	biological_process	0.67321	1	8	2561	82	24160	gene-KI387_026485,Novel03171,gene-KI387_028819,gene-KI387_011006,gene-KI387_023267,gene-KI387_037271,gene-KI387_023268,gene-KI387_036235
GO:0002098	tRNA wobble uridine modification	biological_process	0.67332	1	3	2561	31	24160	gene-KI387_027845,gene-KI387_006186,gene-KI387_011327
GO:0019318	hexose metabolic process	biological_process	0.67388	1	8	2561	78	24160	gene-KI387_024158,Novel05913,gene-KI387_005106,gene-KI387_017746,gene-KI387_020344,gene-KI387_038701,gene-KI387_004546,gene-KI387_010870
GO:1902495	transmembrane transporter complex	cellular_component	0.67404	1	3	2561	30	24160	Novel03809,gene-KI387_001899,gene-KI387_030918
GO:1990351	transporter complex	cellular_component	0.67404	1	3	2561	30	24160	gene-KI387_001899,gene-KI387_030918,Novel03809
GO:0016459	myosin complex	cellular_component	0.67414	1	2	2561	22	24160	gene-KI387_023688,gene-KI387_029628
GO:0015980	energy derivation by oxidation of organic compounds	biological_process	0.67429	1	10	2561	101	24160	Novel04127,gene-KI387_005815,Novel03043,gene-KI387_015818,Novel00184,gene-KI387_038848,gene-KI387_007472,gene-KI387_016407,Novel07044,Novel06401
GO:0099023	vesicle tethering complex	cellular_component	0.67496	1	9	2561	93	24160	gene-KI387_010395,gene-KI387_008667,gene-KI387_005492,gene-KI387_006619,gene-KI387_034458,gene-KI387_014387,gene-KI387_029896,gene-KI387_037271,gene-KI387_000912
GO:0019013	viral nucleocapsid	cellular_component	0.67537	1	4	2561	46	24160	gene-KI387_006923,gene-KI387_029490,gene-KI387_022875,gene-KI387_029877
GO:0006801	superoxide metabolic process	biological_process	0.67578	1	1	2561	12	24160	gene-KI387_018338
GO:0004526	ribonuclease P activity	molecular_function	0.67619	1	1	2561	10	24160	gene-KI387_011051
GO:0003924	GTPase activity	molecular_function	0.67651	1	56	2561	511	24160	gene-KI387_022631,gene-KI387_037686,gene-KI387_008405,gene-KI387_017413,gene-KI387_003309,gene-KI387_020092,gene-KI387_007233,gene-KI387_032505,gene-KI387_003306,Novel01235,gene-KI387_018113,gene-KI387_023268,gene-KI387_042919,gene-KI387_043428,gene-KI387_003812,gene-KI387_003811,gene-KI387_029739,gene-KI387_012078,gene-KI387_016282,gene-KI387_018052,gene-KI387_003806,gene-KI387_018989,gene-KI387…
GO:0010628	positive regulation of gene expression	biological_process	0.67654	1	8	2561	81	24160	gene-KI387_019578,Novel00136,gene-KI387_039861,gene-KI387_003664,gene-KI387_021598,gene-KI387_009252,gene-KI387_029292,gene-KI387_000263
GO:0009991	response to extracellular stimulus	biological_process	0.67697	1	4	2561	44	24160	gene-KI387_033235,gene-KI387_034734,Novel02046,gene-KI387_000885
GO:0031668	cellular response to extracellular stimulus	biological_process	0.67697	1	4	2561	44	24160	gene-KI387_000885,gene-KI387_033235,Novel02046,gene-KI387_034734
GO:0071496	cellular response to external stimulus	biological_process	0.67697	1	4	2561	44	24160	gene-KI387_000885,gene-KI387_034734,Novel02046,gene-KI387_033235
GO:0044270	cellular nitrogen compound catabolic process	biological_process	0.67739	1	10	2561	97	24160	gene-KI387_000710,Novel04874,gene-KI387_012305,gene-KI387_002048,gene-KI387_026129,gene-KI387_024052,gene-KI387_033074,gene-KI387_004168,gene-KI387_012304,gene-KI387_033437
GO:0007093	mitotic cell cycle checkpoint	biological_process	0.67796	1	1	2561	12	24160	gene-KI387_023267
GO:0019439	aromatic compound catabolic process	biological_process	0.67847	1	10	2561	99	24160	gene-KI387_012304,gene-KI387_016502,gene-KI387_004168,gene-KI387_033437,gene-KI387_002048,gene-KI387_024052,gene-KI387_033074,gene-KI387_026129,gene-KI387_012305,gene-KI387_000710
GO:0016485	protein processing	biological_process	0.67849	1	12	2561	122	24160	gene-KI387_028017,gene-KI387_001400,gene-KI387_019296,Novel01687,gene-KI387_010087,Novel06857,gene-KI387_015465,gene-KI387_018398,Novel03120,gene-KI387_029519,gene-KI387_030897,gene-KI387_018395
GO:0008616	queuosine biosynthetic process	biological_process	0.67898	1	1	2561	8	24160	gene-KI387_028643
GO:0046116	queuosine metabolic process	biological_process	0.67898	1	1	2561	8	24160	gene-KI387_028643
GO:0009060	aerobic respiration	biological_process	0.67949	1	3	2561	28	24160	gene-KI387_038848,gene-KI387_005815,gene-KI387_015818
GO:0005669	transcription factor TFIID complex	cellular_component	0.68099	1	2	2561	23	24160	gene-KI387_004985,gene-KI387_014284
GO:0006635	fatty acid beta-oxidation	biological_process	0.68162	1	1	2561	9	24160	gene-KI387_039315
GO:0009062	fatty acid catabolic process	biological_process	0.68162	1	1	2561	9	24160	gene-KI387_039315
GO:0019395	fatty acid oxidation	biological_process	0.68162	1	1	2561	9	24160	gene-KI387_039315
GO:0034440	lipid oxidation	biological_process	0.68162	1	1	2561	9	24160	gene-KI387_039315
GO:0043228	non-membrane-bounded organelle	cellular_component	0.68225	1	117	2561	1215	24160	gene-KI387_016526,gene-KI387_028812,gene-KI387_031023,gene-KI387_009524,gene-KI387_001851,Novel02126,gene-KI387_008243,gene-KI387_017413,gene-KI387_005314,gene-KI387_003006,gene-KI387_007245,gene-KI387_013451,gene-KI387_018125,Novel06984,gene-KI387_015746,gene-KI387_026695,gene-KI387_016577,gene-KI387_034008,Novel05459,gene-KI387_035314,gene-KI387_035426,gene-KI387_000263,gene-KI387_030155,gene-K…
GO:0004659	prenyltransferase activity	molecular_function	0.68272	1	1	2561	9	24160	gene-KI387_018259
GO:0008318	protein prenyltransferase activity	molecular_function	0.68272	1	1	2561	9	24160	gene-KI387_018259
GO:0018342	protein prenylation	biological_process	0.68272	1	1	2561	9	24160	gene-KI387_018259
GO:0097354	prenylation	biological_process	0.68272	1	1	2561	9	24160	gene-KI387_018259
GO:0051213	dioxygenase activity	molecular_function	0.68338	1	16	2561	181	24160	gene-KI387_013454,gene-KI387_013537,gene-KI387_031129,gene-KI387_035915,gene-KI387_019429,gene-KI387_000079,Novel00843,gene-KI387_005436,gene-KI387_001615,gene-KI387_031172,gene-KI387_000339,gene-KI387_031130,gene-KI387_007094,Novel05915,gene-KI387_030330,gene-KI387_019526
GO:0019887	protein kinase regulator activity	molecular_function	0.68401	1	3	2561	32	24160	gene-KI387_015474,gene-KI387_011666,Novel00793
GO:1990542	mitochondrial transmembrane transport	biological_process	0.68669	1	3	2561	33	24160	gene-KI387_026485,Novel03171,gene-KI387_036235
GO:0016247	channel regulator activity	molecular_function	0.68737	1	9	2561	91	24160	gene-KI387_005757,gene-KI387_007886,gene-KI387_022917,gene-KI387_038090,gene-KI387_024079,Novel01235,gene-KI387_020071,gene-KI387_030823,gene-KI387_018247
GO:0099106	ion channel regulator activity	molecular_function	0.68737	1	9	2561	91	24160	gene-KI387_030823,gene-KI387_020071,gene-KI387_018247,gene-KI387_007886,gene-KI387_022917,gene-KI387_005757,Novel01235,gene-KI387_024079,gene-KI387_038090
GO:0050151	oleate hydratase activity	molecular_function	0.68777	1	1	2561	11	24160	gene-KI387_014640
GO:0070566	adenylyltransferase activity	molecular_function	0.68781	1	3	2561	29	24160	gene-KI387_008557,gene-KI387_022690,gene-KI387_010260
GO:0043094	cellular metabolic compound salvage	biological_process	0.6884	1	1	2561	9	24160	gene-KI387_028643
GO:0043174	nucleoside salvage	biological_process	0.6884	1	1	2561	9	24160	gene-KI387_028643
GO:0019083	viral transcription	biological_process	0.68864	1	2	2561	18	24160	gene-KI387_039689,Novel00621
GO:0016168	chlorophyll binding	molecular_function	0.68877	1	1	2561	9	24160	Novel00947
GO:0010468	regulation of gene expression	biological_process	0.68879	1	205	2561	1881	24160	Novel06031,Novel04876,gene-KI387_024347,gene-KI387_039280,Novel01987,gene-KI387_008921,gene-KI387_000263,gene-KI387_035426,gene-KI387_034799,Novel05318,gene-KI387_035419,gene-KI387_005437,gene-KI387_012620,gene-KI387_014528,gene-KI387_001795,gene-KI387_006093,gene-KI387_035687,gene-KI387_042806,gene-KI387_011991,Novel03120,gene-KI387_001851,gene-KI387_018113,gene-KI387_024960,gene-KI387_011998,ge…
GO:0072657	protein localization to membrane	biological_process	0.68908	1	10	2561	103	24160	gene-KI387_028330,gene-KI387_011006,gene-KI387_020344,gene-KI387_005866,gene-KI387_037686,Novel06400,gene-KI387_022631,gene-KI387_023506,gene-KI387_018299,gene-KI387_018113
GO:0090150	establishment of protein localization to membrane	biological_process	0.68908	1	10	2561	103	24160	gene-KI387_020344,gene-KI387_005866,gene-KI387_028330,gene-KI387_011006,Novel06400,gene-KI387_022631,gene-KI387_037686,gene-KI387_023506,gene-KI387_018113,gene-KI387_018299
GO:0009893	positive regulation of metabolic process	biological_process	0.69039	1	9	2561	92	24160	gene-KI387_029292,gene-KI387_000263,gene-KI387_034734,gene-KI387_003664,gene-KI387_009252,gene-KI387_021598,Novel00136,gene-KI387_019578,gene-KI387_039861
GO:0010604	positive regulation of macromolecule metabolic process	biological_process	0.69039	1	9	2561	92	24160	gene-KI387_019578,Novel00136,gene-KI387_039861,gene-KI387_034734,gene-KI387_003664,gene-KI387_009252,gene-KI387_021598,gene-KI387_000263,gene-KI387_029292
GO:0005672	transcription factor TFIIA complex	cellular_component	0.69325	1	3	2561	30	24160	gene-KI387_027845,gene-KI387_023267,gene-KI387_038625
GO:0008374	O-acyltransferase activity	molecular_function	0.69422	1	8	2561	78	24160	gene-KI387_022720,gene-KI387_027480,Novel02237,gene-KI387_032084,gene-KI387_004168,gene-KI387_018062,gene-KI387_019812,gene-KI387_000447
GO:1902531	regulation of intracellular signal transduction	biological_process	0.69455	1	4	2561	42	24160	Novel04574,gene-KI387_034371,gene-KI387_034734,gene-KI387_033235
GO:0006518	peptide metabolic process	biological_process	0.69459	1	100	2561	953	24160	Novel00888,gene-KI387_010667,gene-KI387_025872,gene-KI387_031729,gene-KI387_041725,gene-KI387_011339,gene-KI387_021877,gene-KI387_006291,Novel01358,gene-KI387_027280,gene-KI387_023996,Novel00922,gene-KI387_016576,Novel02865,gene-KI387_036196,gene-KI387_018062,Novel05750,gene-KI387_017985,gene-KI387_028567,gene-KI387_035594,gene-KI387_019809,gene-KI387_037377,gene-KI387_033152,Novel02333,gene-KI38…
GO:0050792	regulation of viral process	biological_process	0.69511	1	2	2561	18	24160	gene-KI387_023762,gene-KI387_039689
GO:2001251	negative regulation of chromosome organization	biological_process	0.69543	1	1	2561	12	24160	gene-KI387_023267
GO:1902533	positive regulation of intracellular signal transduction	biological_process	0.6958	1	2	2561	19	24160	gene-KI387_034734,gene-KI387_034371
GO:0000152	nuclear ubiquitin ligase complex	cellular_component	0.69643	1	18	2561	166	24160	gene-KI387_024960,Novel04609,gene-KI387_024959,Novel00217,Novel04702,gene-KI387_022871,gene-KI387_002173,Novel06930,gene-KI387_001100,gene-KI387_003256,Novel02046,gene-KI387_011930,gene-KI387_011278,Novel01813,gene-KI387_006194,gene-KI387_011409,gene-KI387_032203,gene-KI387_016879
GO:0005680	anaphase-promoting complex	cellular_component	0.69643	1	18	2561	166	24160	gene-KI387_032203,gene-KI387_016879,Novel02046,gene-KI387_011930,gene-KI387_011278,gene-KI387_011409,gene-KI387_006194,Novel01813,gene-KI387_022871,gene-KI387_002173,gene-KI387_003256,gene-KI387_001100,Novel06930,gene-KI387_024959,gene-KI387_024960,Novel04609,Novel00217,Novel04702
GO:0031461	cullin-RING ubiquitin ligase complex	cellular_component	0.69643	1	18	2561	166	24160	Novel06930,gene-KI387_001100,gene-KI387_003256,gene-KI387_002173,gene-KI387_022871,Novel04702,Novel00217,Novel04609,gene-KI387_024960,gene-KI387_024959,gene-KI387_016879,gene-KI387_032203,Novel01813,gene-KI387_011409,gene-KI387_006194,gene-KI387_011278,gene-KI387_011930,Novel02046
GO:0016593	Cdc73/Paf1 complex	cellular_component	0.69705	1	1	2561	10	24160	Novel00871
GO:0008324	cation transmembrane transporter activity	molecular_function	0.69705	1	66	2561	631	24160	gene-KI387_014600,Novel02854,gene-KI387_010752,gene-KI387_007137,gene-KI387_038848,gene-KI387_009504,gene-KI387_034485,gene-KI387_015139,gene-KI387_018627,gene-KI387_032152,gene-KI387_032443,gene-KI387_039308,gene-KI387_005377,gene-KI387_002162,Novel00407,Novel05085,Novel07069,gene-KI387_026421,gene-KI387_033732,gene-KI387_018341,gene-KI387_018689,gene-KI387_034734,gene-KI387_019418,Novel03809,ge…
GO:0034219	carbohydrate transmembrane transport	biological_process	0.69833	1	1	2561	9	24160	Novel03092
GO:0005747	mitochondrial respiratory chain complex I	cellular_component	0.69836	1	2	2561	21	24160	Novel04667,gene-KI387_008350
GO:0030964	NADH dehydrogenase complex	cellular_component	0.69836	1	2	2561	21	24160	gene-KI387_008350,Novel04667
GO:0045271	respiratory chain complex I	cellular_component	0.69836	1	2	2561	21	24160	Novel04667,gene-KI387_008350
GO:0019008	molybdopterin synthase complex	cellular_component	0.69838	1	1	2561	9	24160	gene-KI387_031774
GO:1990204	oxidoreductase complex	cellular_component	0.69857	1	4	2561	43	24160	gene-KI387_007472,Novel04667,gene-KI387_008350,Novel07044
GO:0004532	exoribonuclease activity	molecular_function	0.69867	1	1	2561	11	24160	gene-KI387_000710
GO:0016896	exoribonuclease activity, producing 5-phosphomonoesters	molecular_function	0.69867	1	1	2561	11	24160	gene-KI387_000710
GO:0009404	toxin metabolic process	biological_process	0.69919	1	2	2561	22	24160	Novel02052,gene-KI387_003726
GO:0006113	fermentation	biological_process	0.70003	1	1	2561	9	24160	gene-KI387_016407
GO:0019665	anaerobic amino acid catabolic process	biological_process	0.70003	1	1	2561	9	24160	gene-KI387_016407
GO:0019666	nitrogenous compound fermentation	biological_process	0.70003	1	1	2561	9	24160	gene-KI387_016407
GO:0033202	DNA helicase complex	cellular_component	0.70094	1	1	2561	10	24160	Novel07451
GO:0030515	snoRNA binding	molecular_function	0.70129	1	1	2561	10	24160	gene-KI387_035541
GO:0034061	DNA polymerase activity	molecular_function	0.70202	1	7	2561	70	24160	Novel02398,gene-KI387_031483,gene-KI387_008489,gene-KI387_039006,Novel03474,gene-KI387_026868,gene-KI387_010354
GO:0007286	spermatid development	biological_process	0.70239	1	1	2561	11	24160	gene-KI387_016967
GO:0048515	spermatid differentiation	biological_process	0.70239	1	1	2561	11	24160	gene-KI387_016967
GO:0015399	primary active transmembrane transporter activity	molecular_function	0.70306	1	22	2561	204	24160	gene-KI387_021501,gene-KI387_020615,gene-KI387_012774,Novel03338,gene-KI387_025520,gene-KI387_042919,gene-KI387_004972,gene-KI387_012777,gene-KI387_003306,gene-KI387_039308,gene-KI387_005377,gene-KI387_008030,gene-KI387_003309,gene-KI387_006587,Novel01818,gene-KI387_032173,gene-KI387_028126,gene-KI387_010262,gene-KI387_003318,gene-KI387_033209,gene-KI387_038848,gene-KI387_018689
GO:0022890	inorganic cation transmembrane transporter activity	molecular_function	0.70498	1	62	2561	594	24160	gene-KI387_020139,gene-KI387_019418,Novel03809,gene-KI387_033235,Novel03745,gene-KI387_000872,gene-KI387_001584,gene-KI387_009658,gene-KI387_026421,gene-KI387_033732,gene-KI387_009463,Novel07069,gene-KI387_030057,gene-KI387_001721,gene-KI387_034734,gene-KI387_018689,gene-KI387_005824,gene-KI387_018341,gene-KI387_032445,gene-KI387_000588,gene-KI387_009487,gene-KI387_021973,gene-KI387_013289,gene-K…
GO:0030688	preribosome, small subunit precursor	cellular_component	0.7051	1	1	2561	10	24160	gene-KI387_024709
GO:0006621	protein retention in ER lumen	biological_process	0.70541	1	1	2561	10	24160	gene-KI387_032806
GO:0035437	maintenance of protein localization in endoplasmic reticulum	biological_process	0.70541	1	1	2561	10	24160	gene-KI387_032806
GO:0046923	ER retention sequence binding	molecular_function	0.70541	1	1	2561	10	24160	gene-KI387_032806
GO:0072595	maintenance of protein localization in organelle	biological_process	0.70541	1	1	2561	10	24160	gene-KI387_032806
GO:0006479	protein methylation	biological_process	0.70575	1	4	2561	40	24160	Novel01085,gene-KI387_009670,gene-KI387_021829,gene-KI387_019280
GO:0008213	protein alkylation	biological_process	0.70575	1	4	2561	40	24160	gene-KI387_021829,gene-KI387_009670,Novel01085,gene-KI387_019280
GO:0010008	endosome membrane	cellular_component	0.70651	1	1	2561	10	24160	Novel05199
GO:0005856	cytoskeleton	cellular_component	0.70658	1	24	2561	256	24160	gene-KI387_023267,gene-KI387_007380,gene-KI387_029228,gene-KI387_017028,gene-KI387_023688,gene-KI387_013451,gene-KI387_006174,gene-KI387_007245,gene-KI387_007748,gene-KI387_020082,gene-KI387_010870,gene-KI387_023268,gene-KI387_006777,gene-KI387_037606,gene-KI387_017619,gene-KI387_001057,gene-KI387_036893,Novel00190,gene-KI387_024647,gene-KI387_015462,gene-KI387_014896,gene-KI387_035426,gene-KI387…
GO:0098590	plasma membrane region	cellular_component	0.70753	1	1	2561	12	24160	gene-KI387_009130
GO:0009235	cobalamin metabolic process	biological_process	0.70772	1	4	2561	49	24160	gene-KI387_022362,gene-KI387_030750,gene-KI387_037212,gene-KI387_031026
GO:0009236	cobalamin biosynthetic process	biological_process	0.70772	1	4	2561	49	24160	gene-KI387_022362,gene-KI387_030750,gene-KI387_037212,gene-KI387_031026
GO:0005787	signal peptidase complex	cellular_component	0.70777	1	2	2561	22	24160	gene-KI387_015465,gene-KI387_030897
GO:0006465	signal peptide processing	biological_process	0.70777	1	2	2561	22	24160	gene-KI387_030897,gene-KI387_015465
GO:0032886	regulation of microtubule-based process	biological_process	0.70781	1	1	2561	10	24160	Novel01517
GO:0044770	cell cycle phase transition	biological_process	0.70782	1	2	2561	21	24160	gene-KI387_011930,gene-KI387_023267
GO:1901987	regulation of cell cycle phase transition	biological_process	0.70782	1	2	2561	21	24160	gene-KI387_023267,gene-KI387_011930
GO:0008023	transcription elongation factor complex	cellular_component	0.70789	1	2	2561	23	24160	gene-KI387_017437,Novel00871
GO:0080134	regulation of response to stress	biological_process	0.70839	1	5	2561	51	24160	gene-KI387_035672,Novel06722,gene-KI387_035673,gene-KI387_004287,gene-KI387_016721
GO:0043604	amide biosynthetic process	biological_process	0.70932	1	99	2561	946	24160	gene-KI387_029882,gene-KI387_026002,gene-KI387_031726,gene-KI387_027178,Novel03017,gene-KI387_026529,gene-KI387_001756,gene-KI387_036923,gene-KI387_028564,gene-KI387_005435,gene-KI387_012250,gene-KI387_009851,Novel00496,gene-KI387_018051,gene-KI387_000816,Novel01589,gene-KI387_007927,Novel04616,Novel06586,gene-KI387_017047,gene-KI387_033421,gene-KI387_035594,gene-KI387_017985,gene-KI387_011758,ge…
GO:0031683	G-protein beta/gamma-subunit complex binding	molecular_function	0.71081	1	7	2561	70	24160	gene-KI387_025520,gene-KI387_028126,gene-KI387_030824,gene-KI387_019081,gene-KI387_012774,gene-KI387_012777,gene-KI387_017746
GO:0043226	organelle	cellular_component	0.71156	1	333	2561	3243	24160	Novel00871,gene-KI387_012605,gene-KI387_015462,gene-KI387_035929,gene-KI387_036235,gene-KI387_027178,gene-KI387_024718,gene-KI387_003777,Novel06403,gene-KI387_000358,gene-KI387_034378,gene-KI387_027845,gene-KI387_030934,Novel04616,gene-KI387_033421,gene-KI387_017047,gene-KI387_002877,gene-KI387_014730,gene-KI387_030933,gene-KI387_015236,gene-KI387_012576,gene-KI387_023862,gene-KI387_035423,gene-K…
GO:0098797	plasma membrane protein complex	cellular_component	0.71252	1	7	2561	73	24160	gene-KI387_030918,gene-KI387_001899,gene-KI387_024922,gene-KI387_026906,gene-KI387_024485,gene-KI387_024921,Novel03809
GO:0006367	transcription initiation from RNA polymerase II promoter	biological_process	0.71417	1	6	2561	63	24160	gene-KI387_023267,gene-KI387_038625,gene-KI387_019459,gene-KI387_007858,Novel01235,gene-KI387_027845
GO:0006720	isoprenoid metabolic process	biological_process	0.71688	1	4	2561	42	24160	gene-KI387_034266,gene-KI387_004306,gene-KI387_039159,gene-KI387_016961
GO:0015995	chlorophyll biosynthetic process	biological_process	0.71689	1	2	2561	19	24160	Novel05750,gene-KI387_036227
GO:0008556	potassium transmembrane transporter activity, phosphorylative mechanism	molecular_function	0.7169	1	1	2561	10	24160	gene-KI387_005377
GO:0046649	lymphocyte activation	biological_process	0.71718	1	1	2561	11	24160	gene-KI387_018046
GO:0019238	cyclohydrolase activity	molecular_function	0.71842	1	1	2561	12	24160	gene-KI387_003207
GO:0006887	exocytosis	biological_process	0.7189	1	7	2561	70	24160	gene-KI387_034458,gene-KI387_010395,gene-KI387_006619,gene-KI387_037271,gene-KI387_029896,gene-KI387_014387,gene-KI387_008667
GO:0070070	proton-transporting V-type ATPase complex assembly	biological_process	0.71941	1	2	2561	21	24160	gene-KI387_033544,gene-KI387_015436
GO:0070072	vacuolar proton-transporting V-type ATPase complex assembly	biological_process	0.71941	1	2	2561	21	24160	gene-KI387_033544,gene-KI387_015436
GO:0043903	regulation of symbiotic process	biological_process	0.71998	1	2	2561	19	24160	gene-KI387_039689,gene-KI387_023762
GO:0009092	homoserine metabolic process	biological_process	0.72028	1	2	2561	19	24160	Novel07017,gene-KI387_012851
GO:0019346	transsulfuration	biological_process	0.72028	1	2	2561	19	24160	gene-KI387_012851,Novel07017
GO:0050667	homocysteine metabolic process	biological_process	0.72028	1	2	2561	19	24160	Novel07017,gene-KI387_012851
GO:0045930	negative regulation of mitotic cell cycle	biological_process	0.72196	1	1	2561	13	24160	gene-KI387_023267
GO:0015934	large ribosomal subunit	cellular_component	0.72227	1	1	2561	13	24160	gene-KI387_032632
GO:0030117	membrane coat	cellular_component	0.72274	1	15	2561	145	24160	gene-KI387_012216,Novel05424,gene-KI387_040351,Novel06562,gene-KI387_028043,gene-KI387_012288,gene-KI387_008667,gene-KI387_007858,Novel05632,gene-KI387_006304,gene-KI387_029292,gene-KI387_033410,gene-KI387_016777,gene-KI387_021501,gene-KI387_027845
GO:0048475	coated membrane	cellular_component	0.72274	1	15	2561	145	24160	gene-KI387_016777,gene-KI387_029292,gene-KI387_033410,gene-KI387_021501,gene-KI387_027845,gene-KI387_012216,Novel05424,Novel06562,gene-KI387_040351,gene-KI387_012288,gene-KI387_028043,gene-KI387_006304,gene-KI387_007858,gene-KI387_008667,Novel05632
GO:0000151	ubiquitin ligase complex	cellular_component	0.72337	1	18	2561	169	24160	Novel02046,gene-KI387_011278,gene-KI387_011930,Novel01813,gene-KI387_006194,gene-KI387_011409,gene-KI387_032203,gene-KI387_016879,gene-KI387_024959,gene-KI387_024960,Novel04609,Novel00217,Novel04702,gene-KI387_022871,gene-KI387_002173,Novel06930,gene-KI387_001100,gene-KI387_003256
GO:0007166	cell surface receptor signaling pathway	biological_process	0.72425	1	10	2561	101	24160	gene-KI387_008680,gene-KI387_038866,Novel05658,Novel00871,gene-KI387_015413,gene-KI387_014859,gene-KI387_007216,gene-KI387_031238,gene-KI387_001882,gene-KI387_026442
GO:0000778	condensed nuclear chromosome kinetochore	cellular_component	0.72794	1	5	2561	64	24160	gene-KI387_007380,gene-KI387_010870,gene-KI387_035426,gene-KI387_036893,gene-KI387_007245
GO:0000780	condensed nuclear chromosome, centromeric region	cellular_component	0.72794	1	5	2561	64	24160	gene-KI387_007380,gene-KI387_010870,gene-KI387_035426,gene-KI387_007245,gene-KI387_036893
GO:0046058	cAMP metabolic process	biological_process	0.729	1	1	2561	13	24160	Novel05887
GO:0051171	regulation of nitrogen compound metabolic process	biological_process	0.72938	1	201	2561	1864	24160	gene-KI387_028938,Novel02869,Novel01235,gene-KI387_016849,gene-KI387_027781,gene-KI387_031027,gene-KI387_030922,gene-KI387_021598,gene-KI387_021476,Novel05702,Novel02017,gene-KI387_010294,Novel00152,gene-KI387_030919,gene-KI387_021478,gene-KI387_003007,gene-KI387_012030,gene-KI387_029218,Novel03801,gene-KI387_007382,Novel03490,gene-KI387_043807,gene-KI387_007401,gene-KI387_023506,gene-KI387_03723…
GO:0033108	mitochondrial respiratory chain complex assembly	biological_process	0.72945	1	3	2561	36	24160	gene-KI387_031864,gene-KI387_006060,Novel03495
GO:0015293	symporter activity	molecular_function	0.72987	1	1	2561	10	24160	gene-KI387_018341
GO:0075733	intracellular transport of virus	biological_process	0.73022	1	2	2561	22	24160	gene-KI387_019070,Novel00184
GO:0005319	lipid transporter activity	molecular_function	0.73056	1	2	2561	27	24160	gene-KI387_026064,gene-KI387_000475
GO:0070071	proton-transporting two-sector ATPase complex assembly	biological_process	0.73072	1	2	2561	22	24160	gene-KI387_015436,gene-KI387_033544
GO:0050664	oxidoreductase activity, acting on NAD(P)H, oxygen as acceptor	molecular_function	0.73118	1	1	2561	9	24160	gene-KI387_036815
GO:0006839	mitochondrial transport	biological_process	0.73215	1	3	2561	35	24160	gene-KI387_036235,Novel03171,gene-KI387_026485
GO:0009847	spore germination	biological_process	0.7338	1	1	2561	11	24160	gene-KI387_012659
GO:0042592	homeostatic process	biological_process	0.73389	1	20	2561	215	24160	gene-KI387_021973,gene-KI387_002162,gene-KI387_009544,gene-KI387_038769,gene-KI387_026888,gene-KI387_035926,gene-KI387_004819,Novel01687,gene-KI387_011006,gene-KI387_012522,Novel06604,gene-KI387_026320,gene-KI387_010574,gene-KI387_024703,gene-KI387_018216,gene-KI387_023612,Novel03745,gene-KI387_033235,gene-KI387_030057,gene-KI387_039791
GO:0003917	DNA topoisomerase type I (single strand cut, ATP-independent) activity	molecular_function	0.73425	1	1	2561	11	24160	gene-KI387_029877
GO:0015171	amino acid transmembrane transporter activity	molecular_function	0.73595	1	1	2561	10	24160	gene-KI387_018341
GO:0070568	guanylyltransferase activity	molecular_function	0.73753	1	1	2561	11	24160	gene-KI387_023692
GO:0001070	RNA-binding transcription regulator activity	molecular_function	0.73818	1	1	2561	10	24160	gene-KI387_039689
GO:0048524	positive regulation of viral process	biological_process	0.73818	1	1	2561	10	24160	gene-KI387_039689
GO:0050434	positive regulation of viral transcription	biological_process	0.73818	1	1	2561	10	24160	gene-KI387_039689
GO:0016874	ligase activity	molecular_function	0.73829	1	31	2561	300	24160	gene-KI387_022690,gene-KI387_004765,gene-KI387_037286,gene-KI387_014788,Novel05750,gene-KI387_011705,Novel00672,gene-KI387_017268,gene-KI387_003140,gene-KI387_011758,gene-KI387_015468,gene-KI387_013763,gene-KI387_014285,gene-KI387_036092,gene-KI387_007380,gene-KI387_031734,gene-KI387_014925,gene-KI387_012059,gene-KI387_026259,gene-KI387_005263,gene-KI387_003087,Novel06683,gene-KI387_035541,gene-K…
GO:0015711	organic anion transport	biological_process	0.73829	1	11	2561	116	24160	gene-KI387_029519,gene-KI387_039007,gene-KI387_026064,gene-KI387_034755,gene-KI387_027336,gene-KI387_028454,Novel02921,gene-KI387_012659,gene-KI387_015497,gene-KI387_015238,gene-KI387_018341
GO:0016782	transferase activity, transferring sulfur-containing groups	molecular_function	0.73925	1	2	2561	23	24160	Novel01812,gene-KI387_017010
GO:0009141	nucleoside triphosphate metabolic process	biological_process	0.74039	1	11	2561	122	24160	gene-KI387_035280,gene-KI387_004168,Novel00407,Novel07069,gene-KI387_009463,gene-KI387_026339,gene-KI387_019016,gene-KI387_037409,gene-KI387_025064,gene-KI387_034894,gene-KI387_014772
GO:0030545	receptor regulator activity	molecular_function	0.74154	1	21	2561	237	24160	gene-KI387_014964,Novel05925,gene-KI387_035446,gene-KI387_020805,gene-KI387_002187,Novel05735,gene-KI387_014966,Novel05736,gene-KI387_005739,Novel06751,gene-KI387_013958,gene-KI387_029038,gene-KI387_031222,Novel05453,Novel05734,gene-KI387_019070,Novel07290,gene-KI387_029041,gene-KI387_029221,gene-KI387_034697,gene-KI387_015657
[truncated: 847 more rows]
