# Supplementary material for: Technology Invention and Mechanism Analysis of Rapid Rooting of Taxus × media Rehder Branches Induced by Agrobacterium rhizogenes
Source: Int J Mol Sci. 2023 Dec 27;25(1):375. doi: 10.3390/ijms25010375 (PMC10779043; doi:10.3390/ijms25010375)
Supplement: Supplementary file 1 [file ijms-25-00375-s001.zip › Table S4. The upregulated GO terms in DEGs of TRvsWR.xlsx]

## Sheet: Table S4 The upregulated GO ter
Title: Technology Invention and Mechanism Analysis of Rapid Rooting of Taxus media Branches Induced by Agrobacterium rhizogenes
Authors: Ying Wang, Xiumei Luo, Haotian Su, Ge Guan, Shuang Liu, Maozhi Ren
Supplementary Table S4. The upregulated GO terms in DEGs of TR vs WR.
GO_accession	Description	Term_type	Over_represented_pValue	Corrected_pValue	DEG_item	DEG_list	Bg_item	Bg_list	Gene_names
GO:0044815	DNA packaging complex	cellular_component	4.4503e-09	1.1862e-05	31	2861	109	24160	gene-KI387_030855,gene-KI387_000643,Novel02662,gene-KI387_026114,Novel00588,gene-KI387_025845,gene-KI387_025069,gene-KI387_002988,gene-KI387_038609,gene-KI387_014278,gene-KI387_038571,gene-KI387_015500,gene-KI387_028432,gene-KI387_018037,Novel03834,gene-KI387_029868,gene-KI387_000633,gene-KI387_043920,gene-KI387_000632,gene-KI387_002989,Novel06226,gene-KI387_034390,gene-KI387_037906,gene-KI387_02…
GO:0000785	chromatin	cellular_component	4.9967e-09	1.1862e-05	36	2861	127	24160	gene-KI387_034390,gene-KI387_002989,gene-KI387_019194,gene-KI387_030667,gene-KI387_006257,gene-KI387_014286,gene-KI387_037906,gene-KI387_002988,gene-KI387_025069,gene-KI387_025845,gene-KI387_026114,Novel00588,Novel02662,Novel03044,gene-KI387_031884,gene-KI387_012099,gene-KI387_018037,gene-KI387_014278,gene-KI387_038609,Novel06226,gene-KI387_000632,gene-KI387_009072,gene-KI387_043920,gene-KI387_00…
GO:0055114	oxidation-reduction process	biological_process	9.4598e-09	1.4972e-05	427	2861	2784	24160	gene-KI387_034464,gene-KI387_001222,gene-KI387_010555,gene-KI387_019055,gene-KI387_017804,gene-KI387_007051,Novel01809,gene-KI387_032987,gene-KI387_016325,gene-KI387_023992,gene-KI387_026188,Novel02656,Novel04282,gene-KI387_000488,gene-KI387_031000,gene-KI387_002644,gene-KI387_002622,Novel06838,gene-KI387_036071,gene-KI387_002012,gene-KI387_026009,gene-KI387_022680,gene-KI387_033908,gene-KI387_02…
GO:0000786	nucleosome	cellular_component	1.9562e-08	2.322e-05	29	2861	106	24160	gene-KI387_038571,gene-KI387_014278,gene-KI387_028432,gene-KI387_018037,gene-KI387_038609,Novel03834,gene-KI387_000643,gene-KI387_030855,gene-KI387_025845,gene-KI387_025069,gene-KI387_002988,Novel02662,gene-KI387_026114,Novel00588,gene-KI387_006257,gene-KI387_014286,gene-KI387_037906,gene-KI387_003463,gene-KI387_022830,gene-KI387_031888,gene-KI387_032240,gene-KI387_019194,gene-KI387_000623,gene-K…
GO:0016491	oxidoreductase activity	molecular_function	2.5381e-08	2.4101e-05	439	2861	2896	24160	gene-KI387_021144,gene-KI387_026031,gene-KI387_026278,gene-KI387_005360,gene-KI387_016111,gene-KI387_026605,gene-KI387_035544,gene-KI387_023225,gene-KI387_022326,gene-KI387_012138,gene-KI387_004856,gene-KI387_023524,gene-KI387_016558,gene-KI387_041190,gene-KI387_035972,gene-KI387_023698,Novel06465,gene-KI387_010945,gene-KI387_007489,Novel02093,gene-KI387_016363,gene-KI387_034132,gene-KI387_021488…
GO:0032993	protein-DNA complex	cellular_component	4.0068e-08	3.1707e-05	31	2861	121	24160	Novel06226,gene-KI387_034390,gene-KI387_043920,gene-KI387_000633,gene-KI387_031655,gene-KI387_000632,gene-KI387_002989,gene-KI387_019194,gene-KI387_000623,gene-KI387_032240,gene-KI387_031888,gene-KI387_037906,gene-KI387_022830,gene-KI387_003463,gene-KI387_014286,gene-KI387_006257,Novel02662,Novel00588,gene-KI387_026114,gene-KI387_025845,gene-KI387_025069,gene-KI387_002988,gene-KI387_030855,gene-K…
GO:0003885	D-arabinono-1,4-lactone oxidase activity	molecular_function	2.6901e-06	0.0015966	14	2861	25	24160	Novel06165,Novel03314,gene-KI387_033908,gene-KI387_035192,Novel03018,Novel03019,gene-KI387_025619,gene-KI387_035195,gene-KI387_035194,Novel03310,Novel07199,gene-KI387_037740,gene-KI387_025620,Novel05099
GO:0016899	oxidoreductase activity, acting on the CH-OH group of donors, oxygen as acceptor	molecular_function	2.6901e-06	0.0015966	14	2861	25	24160	gene-KI387_037740,Novel03310,Novel07199,gene-KI387_025620,Novel05099,gene-KI387_033908,Novel06165,Novel03314,gene-KI387_035192,Novel03018,gene-KI387_025619,Novel03019,gene-KI387_035194,gene-KI387_035195
GO:0005694	chromosome	cellular_component	9.0245e-06	0.0047609	78	2861	432	24160	gene-KI387_019194,Novel07508,gene-KI387_037906,Novel01067,gene-KI387_034863,gene-KI387_042546,gene-KI387_034390,gene-KI387_031655,gene-KI387_002989,gene-KI387_031884,gene-KI387_003117,gene-KI387_000695,gene-KI387_029868,Novel04836,gene-KI387_026395,gene-KI387_018037,Novel00588,gene-KI387_026114,gene-KI387_002988,gene-KI387_000623,gene-KI387_022830,gene-KI387_000228,Novel06226,gene-KI387_018789,ge…
GO:0043531	ADP binding	molecular_function	2.5851e-05	0.011831	95	2861	418	24160	gene-KI387_033828,gene-KI387_035338,gene-KI387_040682,Novel03045,gene-KI387_035750,gene-KI387_033992,Novel01181,gene-KI387_032820,gene-KI387_042936,gene-KI387_021603,gene-KI387_042060,gene-KI387_006267,gene-KI387_025622,gene-KI387_035952,gene-KI387_008844,gene-KI387_035341,gene-KI387_035696,gene-KI387_033507,gene-KI387_034284,gene-KI387_035631,gene-KI387_035340,gene-KI387_021462,Novel00827,gene-K…
GO:0015267	channel activity	molecular_function	2.99e-05	0.011831	62	2861	292	24160	Novel03267,gene-KI387_019181,Novel03232,gene-KI387_009953,gene-KI387_038936,Novel01457,gene-KI387_025940,gene-KI387_025376,gene-KI387_018969,gene-KI387_021443,gene-KI387_033175,gene-KI387_032226,gene-KI387_014593,gene-KI387_015382,gene-KI387_000413,Novel05763,gene-KI387_032224,gene-KI387_033736,gene-KI387_034884,gene-KI387_036725,gene-KI387_024034,gene-KI387_022247,gene-KI387_008469,gene-KI387_03…
GO:0022803	passive transmembrane transporter activity	molecular_function	2.99e-05	0.011831	62	2861	292	24160	gene-KI387_031011,gene-KI387_015386,Novel01747,gene-KI387_038708,gene-KI387_023507,gene-KI387_042319,Novel02292,gene-KI387_005247,gene-KI387_041763,gene-KI387_012976,gene-KI387_019866,Novel06411,gene-KI387_002697,gene-KI387_019801,gene-KI387_001167,gene-KI387_005683,gene-KI387_031285,gene-KI387_032576,gene-KI387_032575,gene-KI387_032643,Novel01258,gene-KI387_034145,gene-KI387_008890,gene-KI387_01…
GO:0004185	serine-type carboxypeptidase activity	molecular_function	4.7456e-05	0.017332	19	2861	57	24160	gene-KI387_016070,gene-KI387_004567,gene-KI387_016071,gene-KI387_001387,gene-KI387_030950,gene-KI387_018579,gene-KI387_016154,gene-KI387_016050,gene-KI387_007364,gene-KI387_001374,Novel01434,Novel02848,gene-KI387_027865,Novel02849,gene-KI387_007439,gene-KI387_027868,gene-KI387_004568,Novel05017,gene-KI387_018195
GO:0010207	photosystem II assembly	biological_process	8.5324e-05	0.028937	6	2861	10	24160	gene-KI387_014405,gene-KI387_034765,gene-KI387_014403,gene-KI387_018529,gene-KI387_015120,gene-KI387_018528
GO:0004180	carboxypeptidase activity	molecular_function	0.000118	0.037351	20	2861	66	24160	gene-KI387_016071,gene-KI387_004567,gene-KI387_001387,gene-KI387_003251,gene-KI387_016070,gene-KI387_027865,Novel02848,Novel01434,gene-KI387_001374,gene-KI387_030950,gene-KI387_018579,gene-KI387_016154,gene-KI387_007364,gene-KI387_016050,Novel05017,gene-KI387_018195,Novel02849,gene-KI387_007439,gene-KI387_004568,gene-KI387_027868
GO:0004601	peroxidase activity	molecular_function	0.00039116	0.11608	39	2861	198	24160	gene-KI387_003638,gene-KI387_039120,gene-KI387_037852,gene-KI387_039121,gene-KI387_004730,gene-KI387_021354,gene-KI387_033964,Novel00042,gene-KI387_015409,gene-KI387_036116,gene-KI387_023698,gene-KI387_021355,gene-KI387_028400,gene-KI387_035684,gene-KI387_016326,gene-KI387_037900,gene-KI387_016324,gene-KI387_023127,gene-KI387_026605,gene-KI387_023225,gene-KI387_021353,Novel00749,gene-KI387_003632…
GO:0020037	heme binding	molecular_function	0.00047437	0.13014	126	2861	757	24160	gene-KI387_001222,Novel02451,gene-KI387_017804,gene-KI387_043446,gene-KI387_011778,gene-KI387_023348,gene-KI387_040272,Novel05171,gene-KI387_012913,gene-KI387_017342,gene-KI387_023226,gene-KI387_016325,gene-KI387_003184,gene-KI387_026271,Novel06425,Novel00012,Novel05187,gene-KI387_023151,gene-KI387_035311,gene-KI387_030688,gene-KI387_013931,gene-KI387_015674,gene-KI387_002622,gene-KI387_028579,ge…
GO:0016209	antioxidant activity	molecular_function	0.00049338	0.13014	48	2861	258	24160	gene-KI387_035684,gene-KI387_021355,gene-KI387_028400,gene-KI387_023698,gene-KI387_036116,gene-KI387_016324,gene-KI387_037900,gene-KI387_016326,gene-KI387_023127,gene-KI387_026605,gene-KI387_023225,gene-KI387_023524,gene-KI387_021085,gene-KI387_003638,gene-KI387_004730,gene-KI387_039121,gene-KI387_037852,gene-KI387_039120,gene-KI387_033964,gene-KI387_021354,gene-KI387_010113,Novel00042,gene-KI387…
GO:0016538	cyclin-dependent protein serine/threonine kinase regulator activity	molecular_function	0.00090815	0.22694	5	2861	8	24160	Novel01311,gene-KI387_011802,gene-KI387_032023,Novel04864,Novel05903
GO:0070008	serine-type exopeptidase activity	molecular_function	0.001186	0.28155	22	2861	88	24160	gene-KI387_018195,Novel05017,Novel02849,Novel02587,gene-KI387_029908,gene-KI387_007439,gene-KI387_004568,gene-KI387_027868,gene-KI387_016071,gene-KI387_004567,gene-KI387_001387,Novel06731,gene-KI387_016070,Novel02848,gene-KI387_027865,gene-KI387_001374,Novel01434,gene-KI387_016154,gene-KI387_018579,gene-KI387_030950,gene-KI387_007364,gene-KI387_016050
GO:0016684	oxidoreductase activity, acting on peroxide as acceptor	molecular_function	0.0013242	0.2994	39	2861	208	24160	gene-KI387_003632,Novel00749,gene-KI387_023151,gene-KI387_021353,gene-KI387_023136,Novel05162,gene-KI387_035933,gene-KI387_022680,gene-KI387_015213,gene-KI387_000992,gene-KI387_043034,gene-KI387_015674,Novel02189,gene-KI387_024819,gene-KI387_001222,gene-KI387_003184,gene-KI387_016325,gene-KI387_023226,gene-KI387_040272,gene-KI387_037852,gene-KI387_039121,gene-KI387_039120,gene-KI387_004730,gene-K…
GO:0046906	tetrapyrrole binding	molecular_function	0.0015226	0.3286	126	2861	779	24160	gene-KI387_023225,gene-KI387_026605,gene-KI387_023127,gene-KI387_026278,gene-KI387_026031,gene-KI387_025103,gene-KI387_037536,Novel02093,gene-KI387_037900,gene-KI387_036116,gene-KI387_002607,gene-KI387_029385,gene-KI387_035972,gene-KI387_023698,gene-KI387_021355,gene-KI387_006378,Novel00820,gene-KI387_026202,Novel00042,gene-KI387_015409,gene-KI387_026276,gene-KI387_038914,gene-KI387_021354,gene-K…
GO:0005791	rough endoplasmic reticulum	cellular_component	0.0016673	0.32984	14	2861	50	24160	gene-KI387_002517,gene-KI387_030994,gene-KI387_020056,Novel07508,gene-KI387_018291,gene-KI387_023573,gene-KI387_042546,gene-KI387_037852,gene-KI387_012544,gene-KI387_030500,gene-KI387_015729,gene-KI387_031655,Novel02306,Novel00743
GO:0030867	rough endoplasmic reticulum membrane	cellular_component	0.0016673	0.32984	14	2861	50	24160	Novel07508,gene-KI387_018291,gene-KI387_030994,gene-KI387_020056,gene-KI387_002517,Novel02306,Novel00743,gene-KI387_015729,gene-KI387_030500,gene-KI387_031655,gene-KI387_012544,gene-KI387_042546,gene-KI387_023573,gene-KI387_037852
GO:0006979	response to oxidative stress	biological_process	0.0017377	0.33003	39	2861	213	24160	gene-KI387_040272,gene-KI387_012566,gene-KI387_023226,gene-KI387_016325,gene-KI387_003184,gene-KI387_001222,Novel02189,gene-KI387_015674,gene-KI387_043034,gene-KI387_000992,gene-KI387_015213,gene-KI387_022680,gene-KI387_035933,gene-KI387_023136,gene-KI387_021353,gene-KI387_023151,Novel00749,gene-KI387_003632,Novel05856,gene-KI387_023127,gene-KI387_023225,gene-KI387_026605,gene-KI387_021355,gene-K…
GO:0004861	cyclin-dependent protein serine/threonine kinase inhibitor activity	molecular_function	0.0018079	0.33015	3	2861	3	24160	Novel04864,gene-KI387_011802,gene-KI387_032023
GO:0030001	metal ion transport	biological_process	0.0024159	0.42484	73	2861	442	24160	Novel07197,gene-KI387_014599,gene-KI387_013376,gene-KI387_005260,gene-KI387_005241,Novel04058,gene-KI387_000035,gene-KI387_010910,gene-KI387_019344,gene-KI387_007489,gene-KI387_029392,gene-KI387_008450,gene-KI387_008890,gene-KI387_039683,Novel06759,gene-KI387_034152,gene-KI387_019342,gene-KI387_019866,Novel01936,gene-KI387_037459,gene-KI387_033736,gene-KI387_030440,Novel06524,gene-KI387_044032,ge…
GO:0009522	photosystem I	cellular_component	0.0027386	0.45558	9	2861	26	24160	gene-KI387_019327,gene-KI387_001503,gene-KI387_035223,gene-KI387_009529,gene-KI387_023127,gene-KI387_031170,gene-KI387_022438,gene-KI387_039857,gene-KI387_038076
GO:0017048	Rho GTPase binding	molecular_function	0.0027998	0.45558	10	2861	32	24160	Novel00918,gene-KI387_030295,Novel03887,gene-KI387_028604,Novel06439,Novel07208,gene-KI387_009841,gene-KI387_035952,gene-KI387_024161,gene-KI387_004726
GO:0050896	response to stimulus	biological_process	0.0028785	0.45558	339	2861	2432	24160	Novel02441,gene-KI387_030500,gene-KI387_024355,gene-KI387_024078,gene-KI387_026122,Novel06409,gene-KI387_020323,gene-KI387_021515,gene-KI387_038993,gene-KI387_032778,Novel06443,Novel07508,gene-KI387_032682,gene-KI387_035694,gene-KI387_020416,gene-KI387_025090,gene-KI387_021013,gene-KI387_033192,Novel06724,gene-KI387_013007,Novel01372,Novel02429,Novel06167,gene-KI387_013411,gene-KI387_026395,gene-…
GO:0016759	cellulose synthase activity	molecular_function	0.0033674	0.48449	16	2861	60	24160	Novel06221,gene-KI387_034362,gene-KI387_022268,gene-KI387_008966,gene-KI387_010785,gene-KI387_034375,gene-KI387_034367,gene-KI387_034364,gene-KI387_040266,gene-KI387_031805,gene-KI387_035372,gene-KI387_008976,gene-KI387_037661,Novel06222,gene-KI387_034363,gene-KI387_034376
GO:0016760	cellulose synthase (UDP-forming) activity	molecular_function	0.0033674	0.48449	16	2861	60	24160	gene-KI387_031805,gene-KI387_040266,gene-KI387_034364,gene-KI387_034367,gene-KI387_034375,gene-KI387_010785,gene-KI387_008966,gene-KI387_022268,gene-KI387_034362,Novel06221,gene-KI387_034376,gene-KI387_034363,Novel06222,gene-KI387_037661,gene-KI387_008976,gene-KI387_035372
GO:0030244	cellulose biosynthetic process	biological_process	0.0033674	0.48449	16	2861	60	24160	gene-KI387_034362,Novel06221,gene-KI387_008966,gene-KI387_022268,gene-KI387_010785,gene-KI387_034364,gene-KI387_034367,gene-KI387_034375,gene-KI387_040266,gene-KI387_031805,gene-KI387_008976,gene-KI387_035372,gene-KI387_037661,Novel06222,gene-KI387_034363,gene-KI387_034376
GO:0030638	polyketide metabolic process	biological_process	0.0036807	0.51401	3	2861	4	24160	gene-KI387_010277,gene-KI387_010275,gene-KI387_009946
GO:0005664	nuclear origin of replication recognition complex	cellular_component	0.0038571	0.51423	7	2861	21	24160	gene-KI387_032265,gene-KI387_016808,gene-KI387_033736,gene-KI387_028987,Novel01401,Novel07508,gene-KI387_032266
GO:0007050	cell cycle arrest	biological_process	0.0039731	0.51423	3	2861	4	24160	Novel04864,gene-KI387_011802,gene-KI387_032023
GO:0006950	response to stress	biological_process	0.0041489	0.51423	178	2861	1256	24160	gene-KI387_020169,Novel03826,gene-KI387_010611,gene-KI387_035519,gene-KI387_015529,gene-KI387_031942,gene-KI387_015213,Novel00176,gene-KI387_026959,Novel02778,gene-KI387_015142,gene-KI387_030668,Novel00749,gene-KI387_003632,gene-KI387_015456,gene-KI387_008188,gene-KI387_001618,gene-KI387_033190,gene-KI387_016202,gene-KI387_021353,gene-KI387_011870,gene-KI387_016802,gene-KI387_018047,gene-KI387_01…
GO:0008236	serine-type peptidase activity	molecular_function	0.0043881	0.51423	62	2861	345	24160	gene-KI387_029359,Novel02023,Novel05017,gene-KI387_021008,gene-KI387_016311,gene-KI387_004914,Novel02587,gene-KI387_024131,gene-KI387_010382,gene-KI387_004568,gene-KI387_031115,Novel06655,Novel01329,gene-KI387_014401,Novel02848,Novel04001,gene-KI387_016154,gene-KI387_022719,gene-KI387_018579,gene-KI387_039410,gene-KI387_016050,gene-KI387_016071,gene-KI387_040403,gene-KI387_000561,gene-KI387_00833…
GO:0016825	hydrolase activity, acting on acid phosphorus-nitrogen bonds	molecular_function	0.0043881	0.51423	62	2861	345	24160	Novel01329,Novel06655,gene-KI387_014401,Novel05017,gene-KI387_021008,Novel02023,gene-KI387_029359,gene-KI387_010382,gene-KI387_004568,gene-KI387_031115,gene-KI387_004914,Novel02587,gene-KI387_024131,gene-KI387_016311,gene-KI387_000561,gene-KI387_040403,gene-KI387_016071,gene-KI387_026770,gene-KI387_008561,gene-KI387_008335,Novel04001,Novel02848,gene-KI387_016050,gene-KI387_039410,gene-KI387_01615…
GO:0017171	serine hydrolase activity	molecular_function	0.0043881	0.51423	62	2861	345	24160	gene-KI387_026048,gene-KI387_021005,gene-KI387_001387,gene-KI387_004567,gene-KI387_016070,Novel06731,gene-KI387_010381,gene-KI387_029360,gene-KI387_027865,Novel01434,gene-KI387_001374,gene-KI387_007364,gene-KI387_033175,gene-KI387_030950,gene-KI387_020319,gene-KI387_037095,gene-KI387_007504,gene-KI387_004965,gene-KI387_028281,gene-KI387_004916,gene-KI387_041100,Novel02366,gene-KI387_022318,gene-K…
GO:0000444	MIS12/MIND type complex	cellular_component	0.0044405	0.51423	6	2861	16	24160	gene-KI387_000696,gene-KI387_000695,gene-KI387_025626,gene-KI387_042546,gene-KI387_019655,gene-KI387_000228
GO:0005634	nucleus	cellular_component	0.0046365	0.52414	223	2861	1572	24160	Novel05116,Novel04744,gene-KI387_032266,Novel03044,Novel02662,Novel04713,gene-KI387_025069,gene-KI387_032225,gene-KI387_012566,gene-KI387_033736,gene-KI387_038880,gene-KI387_019400,gene-KI387_033881,gene-KI387_023468,gene-KI387_030994,Novel04360,Novel05545,gene-KI387_013012,gene-KI387_001295,Novel01179,Novel04146,gene-KI387_023539,gene-KI387_030667,gene-KI387_002318,gene-KI387_005241,Novel04550,N…
GO:0050660	flavin adenine dinucleotide binding	molecular_function	0.0050191	0.55316	48	2861	242	24160	gene-KI387_014037,gene-KI387_011577,gene-KI387_010017,gene-KI387_039344,Novel02656,gene-KI387_026188,gene-KI387_031287,gene-KI387_011617,Novel06165,gene-KI387_011579,Novel03019,gene-KI387_034045,Novel03310,gene-KI387_027709,Novel05528,gene-KI387_010103,gene-KI387_010015,gene-KI387_031018,Novel01782,gene-KI387_015713,gene-KI387_014652,Novel03018,gene-KI387_035192,Novel03314,gene-KI387_035194,gene-…
GO:0003993	acid phosphatase activity	molecular_function	0.0051262	0.55316	8	2861	21	24160	gene-KI387_018705,gene-KI387_000175,gene-KI387_018703,gene-KI387_018707,gene-KI387_007066,gene-KI387_034875,gene-KI387_007073,gene-KI387_024642
GO:0030243	cellulose metabolic process	biological_process	0.0052509	0.55403	16	2861	62	24160	gene-KI387_008966,gene-KI387_022268,gene-KI387_034362,Novel06221,gene-KI387_034364,gene-KI387_034367,gene-KI387_034375,gene-KI387_010785,gene-KI387_031805,gene-KI387_040266,gene-KI387_008976,gene-KI387_035372,gene-KI387_034363,gene-KI387_037661,Novel06222,gene-KI387_034376
GO:0043231	intracellular membrane-bounded organelle	cellular_component	0.0054128	0.5587	305	2861	2195	24160	gene-KI387_001527,gene-KI387_005241,gene-KI387_025266,gene-KI387_015119,gene-KI387_010208,gene-KI387_019655,gene-KI387_007444,gene-KI387_028406,Novel05767,gene-KI387_019997,gene-KI387_008890,gene-KI387_038813,gene-KI387_023796,Novel05784,Novel04864,gene-KI387_036820,gene-KI387_032240,Novel04744,gene-KI387_032266,gene-KI387_039966,Novel03044,gene-KI387_032737,gene-KI387_033736,gene-KI387_012566,ge…
GO:0006355	regulation of transcription, DNA-templated	biological_process	0.0060402	0.57228	224	2861	1552	24160	gene-KI387_013475,gene-KI387_025123,Novel05975,gene-KI387_013606,gene-KI387_029197,Novel06678,gene-KI387_014912,gene-KI387_005551,gene-KI387_010672,Novel01707,gene-KI387_002081,gene-KI387_019312,gene-KI387_013030,gene-KI387_004793,gene-KI387_039242,Novel06055,Novel02269,Novel00788,Novel06329,gene-KI387_024161,gene-KI387_041190,gene-KI387_014643,gene-KI387_006333,Novel07054,gene-KI387_009724,gene-…
GO:1903506	regulation of nucleic acid-templated transcription	biological_process	0.0060402	0.57228	224	2861	1552	24160	Novel02269,Novel06055,gene-KI387_039242,gene-KI387_004793,gene-KI387_020747,gene-KI387_009724,gene-KI387_018529,gene-KI387_022908,gene-KI387_011879,gene-KI387_022888,gene-KI387_041190,gene-KI387_006333,Novel07054,gene-KI387_014643,gene-KI387_024161,Novel00788,Novel06329,gene-KI387_029197,gene-KI387_025123,Novel05975,gene-KI387_013606,gene-KI387_013475,gene-KI387_019312,gene-KI387_002081,gene-KI38…
GO:2001141	regulation of RNA biosynthetic process	biological_process	0.0060402	0.57228	224	2861	1552	24160	gene-KI387_007190,Novel02501,gene-KI387_026644,Novel06186,gene-KI387_012165,gene-KI387_006089,gene-KI387_020416,gene-KI387_035343,Novel02996,gene-KI387_005203,Novel00503,Novel06979,gene-KI387_033192,gene-KI387_035556,gene-KI387_028863,Novel00104,gene-KI387_028604,gene-KI387_017882,gene-KI387_012289,gene-KI387_026122,gene-KI387_012275,Novel03427,Novel04215,Novel07508,gene-KI387_041451,gene-KI387_0…
GO:0006083	acetate metabolic process	biological_process	0.0062245	0.57228	5	2861	10	24160	gene-KI387_006085,gene-KI387_010648,Novel04517,gene-KI387_040659,gene-KI387_026926
GO:0016705	oxidoreductase activity, acting on paired donors, with incorporation or reduction of molecular oxygen	molecular_function	0.0062679	0.57228	103	2861	638	24160	gene-KI387_023123,gene-KI387_000471,gene-KI387_010531,gene-KI387_035615,gene-KI387_026039,Novel02933,gene-KI387_044605,Novel06742,gene-KI387_022385,Novel03216,gene-KI387_008720,gene-KI387_016272,gene-KI387_034265,Novel05663,gene-KI387_000510,gene-KI387_027386,gene-KI387_000272,gene-KI387_035310,gene-KI387_014550,gene-KI387_032881,Novel05172,gene-KI387_015285,Novel03458,gene-KI387_027179,Novel0011…
GO:0051252	regulation of RNA metabolic process	biological_process	0.0062895	0.57228	224	2861	1553	24160	gene-KI387_013224,gene-KI387_021893,gene-KI387_021115,gene-KI387_003620,gene-KI387_023678,Novel04174,gene-KI387_009117,Novel06327,Novel06837,gene-KI387_024587,gene-KI387_037006,gene-KI387_033861,gene-KI387_020471,gene-KI387_021666,gene-KI387_034526,gene-KI387_009618,gene-KI387_001578,Novel06548,gene-KI387_012598,gene-KI387_026117,gene-KI387_027031,gene-KI387_019667,gene-KI387_017616,gene-KI387_02…
GO:0008238	exopeptidase activity	molecular_function	0.0066562	0.57228	24	2861	112	24160	gene-KI387_016071,gene-KI387_004567,gene-KI387_001387,gene-KI387_003251,Novel06731,gene-KI387_016070,Novel02848,gene-KI387_027865,gene-KI387_001374,Novel01434,gene-KI387_030950,gene-KI387_016154,gene-KI387_018579,gene-KI387_007364,gene-KI387_023779,gene-KI387_016050,gene-KI387_018195,Novel05017,Novel02849,Novel02587,gene-KI387_029908,gene-KI387_027868,gene-KI387_007439,gene-KI387_004568
GO:0019219	regulation of nucleobase-containing compound metabolic process	biological_process	0.0068098	0.57228	224	2861	1556	24160	gene-KI387_006089,gene-KI387_012165,Novel06186,gene-KI387_026644,Novel02501,gene-KI387_007190,gene-KI387_028863,gene-KI387_035556,Novel06979,gene-KI387_033192,Novel00503,gene-KI387_005203,gene-KI387_035343,Novel02996,gene-KI387_020416,gene-KI387_038993,gene-KI387_021515,gene-KI387_015140,gene-KI387_041451,gene-KI387_024178,Novel07508,Novel04215,Novel03427,gene-KI387_026122,gene-KI387_012275,gene-…
GO:0031974	membrane-enclosed lumen	cellular_component	0.0069205	0.57228	76	2861	496	24160	Novel02886,gene-KI387_012321,gene-KI387_016525,gene-KI387_000228,gene-KI387_030371,Novel00415,gene-KI387_037852,gene-KI387_031285,Novel07386,gene-KI387_009072,gene-KI387_030467,gene-KI387_028432,gene-KI387_023200,gene-KI387_016802,gene-KI387_005969,gene-KI387_019594,gene-KI387_020524,gene-KI387_008992,gene-KI387_028987,Novel01399,gene-KI387_019194,gene-KI387_025940,gene-KI387_031002,gene-KI387_00…
GO:0043233	organelle lumen	cellular_component	0.0069205	0.57228	76	2861	496	24160	gene-KI387_037852,gene-KI387_030371,Novel00415,gene-KI387_009072,gene-KI387_031285,Novel07386,Novel02886,gene-KI387_016525,gene-KI387_012321,gene-KI387_000228,gene-KI387_019594,gene-KI387_005969,gene-KI387_020524,gene-KI387_008992,Novel01399,gene-KI387_028987,gene-KI387_030467,gene-KI387_016802,gene-KI387_023200,gene-KI387_028432,gene-KI387_028107,gene-KI387_042546,Novel05763,gene-KI387_031655,No…
GO:0070013	intracellular organelle lumen	cellular_component	0.0069205	0.57228	76	2861	496	24160	gene-KI387_012321,gene-KI387_016525,Novel02886,gene-KI387_000228,gene-KI387_037852,Novel00415,gene-KI387_030371,gene-KI387_009072,Novel07386,gene-KI387_031285,gene-KI387_030467,gene-KI387_016802,gene-KI387_028432,gene-KI387_023200,gene-KI387_019594,gene-KI387_005969,Novel01399,gene-KI387_028987,gene-KI387_008992,gene-KI387_020524,gene-KI387_031002,gene-KI387_019194,gene-KI387_025940,Novel07508,ge…
GO:0016887	ATPase activity	molecular_function	0.0070742	0.57228	132	2861	742	24160	gene-KI387_008611,gene-KI387_007242,gene-KI387_041370,gene-KI387_008045,gene-KI387_002615,gene-KI387_013606,gene-KI387_038045,gene-KI387_019448,gene-KI387_033312,gene-KI387_006229,gene-KI387_033305,gene-KI387_033296,gene-KI387_020747,gene-KI387_002297,gene-KI387_011451,Novel02653,gene-KI387_033187,gene-KI387_033939,gene-KI387_032870,gene-KI387_021858,gene-KI387_035702,gene-KI387_036395,gene-KI387…
GO:0071805	potassium ion transmembrane transport	biological_process	0.0072489	0.57228	11	2861	35	24160	gene-KI387_030440,gene-KI387_004834,gene-KI387_008450,gene-KI387_014599,gene-KI387_038094,gene-KI387_015725,gene-KI387_015726,gene-KI387_034152,gene-KI387_023574,gene-KI387_009073,gene-KI387_009072
GO:0043229	intracellular organelle	cellular_component	0.0072707	0.57228	405	2861	3070	24160	Novel02505,gene-KI387_030855,gene-KI387_022908,gene-KI387_033296,gene-KI387_008605,gene-KI387_016987,gene-KI387_025751,gene-KI387_000696,Novel00530,gene-KI387_000035,Novel01908,gene-KI387_025103,gene-KI387_024161,gene-KI387_015278,Novel04705,gene-KI387_019710,gene-KI387_038579,gene-KI387_022317,Novel06611,gene-KI387_000633,gene-KI387_001317,gene-KI387_029197,gene-KI387_006717,gene-KI387_020056,ge…
GO:0042974	retinoic acid receptor binding	molecular_function	0.0073523	0.57228	3	2861	4	24160	gene-KI387_023573,gene-KI387_041451,Novel04360
GO:0034227	tRNA thio-modification	biological_process	0.0077901	0.59657	4	2861	8	24160	Novel05050,gene-KI387_013169,gene-KI387_027887,gene-KI387_030368
GO:0016702	oxidoreductase activity, acting on single donors with incorporation of molecular oxygen, incorporation of two atoms of oxygen	molecular_function	0.0079847	0.60176	26	2861	152	24160	gene-KI387_029373,gene-KI387_035343,gene-KI387_012090,gene-KI387_041190,gene-KI387_007101,gene-KI387_012085,gene-KI387_007035,gene-KI387_043400,Novel06980,gene-KI387_012086,Novel02991,Novel01489,Novel01809,gene-KI387_007051,Novel01810,gene-KI387_030368,gene-KI387_039068,gene-KI387_007087,gene-KI387_038469,gene-KI387_030366,gene-KI387_007107,gene-KI387_016057,gene-KI387_016055,gene-KI387_007102,ge…
GO:0006073	cellular glucan metabolic process	biological_process	0.0083212	0.60783	25	2861	116	24160	Novel04282,gene-KI387_022268,gene-KI387_008966,Novel06221,gene-KI387_034362,gene-KI387_034367,gene-KI387_034375,gene-KI387_034364,gene-KI387_010785,gene-KI387_020660,gene-KI387_031805,gene-KI387_040266,Novel01974,gene-KI387_009169,gene-KI387_035372,gene-KI387_008976,Novel00315,gene-KI387_032655,gene-KI387_020659,gene-KI387_034363,gene-KI387_037661,Novel06222,gene-KI387_018929,gene-KI387_034376,ge…
GO:0044042	glucan metabolic process	biological_process	0.0083212	0.60783	25	2861	116	24160	gene-KI387_018929,Novel06222,gene-KI387_037661,gene-KI387_034363,gene-KI387_001229,gene-KI387_034376,gene-KI387_009169,Novel00315,gene-KI387_032655,gene-KI387_020659,gene-KI387_008976,gene-KI387_035372,gene-KI387_040266,gene-KI387_031805,gene-KI387_020660,Novel01974,gene-KI387_034362,Novel06221,gene-KI387_008966,Novel04282,gene-KI387_022268,gene-KI387_010785,gene-KI387_034364,gene-KI387_034367,ge…
GO:0043934	sporulation	biological_process	0.0086533	0.61484	8	2861	28	24160	gene-KI387_011014,gene-KI387_036255,gene-KI387_022315,gene-KI387_038708,Novel01116,gene-KI387_031775,gene-KI387_004093,gene-KI387_023225
GO:0005618	cell wall	cellular_component	0.0087545	0.61484	11	2861	40	24160	gene-KI387_009169,gene-KI387_032655,Novel00315,gene-KI387_020659,gene-KI387_020660,gene-KI387_023225,gene-KI387_031775,gene-KI387_018929,Novel01974,gene-KI387_001229,Novel04146
GO:0022857	transmembrane transporter activity	molecular_function	0.0088531	0.61484	218	2861	1451	24160	gene-KI387_025376,gene-KI387_016146,gene-KI387_038936,Novel05469,Novel06978,Novel06026,Novel03232,gene-KI387_019181,gene-KI387_009953,Novel04931,gene-KI387_004834,gene-KI387_022682,gene-KI387_035995,gene-KI387_040513,gene-KI387_018969,gene-KI387_017481,gene-KI387_007364,gene-KI387_021443,Novel01116,gene-KI387_024899,Novel05050,gene-KI387_030440,gene-KI387_031524,gene-KI387_023114,Novel00554,gene-…
GO:0009403	toxin biosynthetic process	biological_process	0.0090617	0.61484	5	2861	12	24160	gene-KI387_022318,gene-KI387_020811,gene-KI387_020056,Novel04038,gene-KI387_006085
GO:0046422	violaxanthin de-epoxidase activity	molecular_function	0.0090646	0.61484	3	2861	4	24160	gene-KI387_016045,gene-KI387_023992,gene-KI387_022110
GO:0030312	external encapsulating structure	cellular_component	0.0093906	0.62798	16	2861	68	24160	gene-KI387_009892,Novel01974,Novel04146,Novel04215,gene-KI387_020660,Novel01894,Novel00315,gene-KI387_034277,gene-KI387_020659,gene-KI387_032655,gene-KI387_009169,gene-KI387_001229,gene-KI387_023225,gene-KI387_035205,gene-KI387_031775,gene-KI387_018929
GO:0009620	response to fungus	biological_process	0.010081	0.65254	5	2861	16	24160	gene-KI387_013007,gene-KI387_022646,gene-KI387_022654,gene-KI387_035433,gene-KI387_022648
GO:0050832	defense response to fungus	biological_process	0.010081	0.65254	5	2861	16	24160	gene-KI387_022654,gene-KI387_022648,gene-KI387_035433,gene-KI387_022646,gene-KI387_013007
GO:0016758	transferase activity, transferring hexosyl groups	molecular_function	0.010266	0.65254	68	2861	377	24160	Novel03320,gene-KI387_002763,gene-KI387_035372,gene-KI387_012562,gene-KI387_025031,gene-KI387_025039,Novel06027,gene-KI387_039191,Novel00952,gene-KI387_034362,gene-KI387_022268,Novel00663,gene-KI387_034364,gene-KI387_020660,gene-KI387_009169,gene-KI387_032496,Novel00315,gene-KI387_020659,gene-KI387_032655,gene-KI387_025648,Novel06222,gene-KI387_018929,gene-KI387_012559,Novel01393,Novel06221,Novel…
GO:0009538	photosystem I reaction center	cellular_component	0.010308	0.65254	4	2861	8	24160	gene-KI387_038076,gene-KI387_022438,gene-KI387_035223,gene-KI387_039857
GO:0043226	organelle	cellular_component	0.011081	0.68274	424	2861	3243	24160	Novel03380,gene-KI387_019667,gene-KI387_023573,gene-KI387_032740,Novel02028,gene-KI387_015750,gene-KI387_037537,gene-KI387_009618,gene-KI387_020471,gene-KI387_037720,gene-KI387_033085,gene-KI387_011136,Novel02016,gene-KI387_025078,gene-KI387_003620,gene-KI387_002463,gene-KI387_032237,gene-KI387_010975,gene-KI387_013224,gene-KI387_018108,gene-KI387_038049,Novel04001,Novel01498,gene-KI387_038976,ge…
GO:0005215	transporter activity	molecular_function	0.011188	0.68274	222	2861	1493	24160	gene-KI387_003097,gene-KI387_004903,gene-KI387_025940,Novel01759,gene-KI387_012544,gene-KI387_019618,gene-KI387_021061,gene-KI387_032224,gene-KI387_037067,gene-KI387_023574,gene-KI387_002409,gene-KI387_015382,gene-KI387_022553,gene-KI387_039570,gene-KI387_024034,Novel01115,gene-KI387_032243,gene-KI387_034884,Novel02199,Novel07584,gene-KI387_015726,gene-KI387_001423,gene-KI387_015378,gene-KI387_03…
GO:0071821	FANCM-MHF complex	cellular_component	0.011216	0.68274	6	2861	22	24160	gene-KI387_019194,Novel03834,gene-KI387_002988,gene-KI387_025069,gene-KI387_002989,gene-KI387_028432
GO:0023041	neuronal signal transduction	biological_process	0.012321	0.7195	10	2861	39	24160	gene-KI387_002517,gene-KI387_030994,gene-KI387_020056,Novel07508,gene-KI387_042546,gene-KI387_037852,gene-KI387_030500,gene-KI387_015729,Novel00743,Novel02306
GO:0009617	response to bacterium	biological_process	0.012347	0.7195	15	2861	72	24160	gene-KI387_035433,gene-KI387_022648,gene-KI387_018047,gene-KI387_019579,gene-KI387_020323,gene-KI387_022654,Novel02778,gene-KI387_019300,Novel04958,gene-KI387_002297,gene-KI387_022646,gene-KI387_033682,Novel01803,gene-KI387_033634,gene-KI387_016202
GO:0042742	defense response to bacterium	biological_process	0.012347	0.7195	15	2861	72	24160	Novel01803,gene-KI387_016202,gene-KI387_033634,gene-KI387_033682,gene-KI387_019300,gene-KI387_019579,gene-KI387_020323,gene-KI387_022654,Novel02778,gene-KI387_018047,gene-KI387_022648,gene-KI387_035433,gene-KI387_022646,gene-KI387_002297,Novel04958
GO:0030410	nicotianamine synthase activity	molecular_function	0.012876	0.7195	3	2861	5	24160	Novel02360,gene-KI387_020578,gene-KI387_015766
GO:0030417	nicotianamine metabolic process	biological_process	0.012876	0.7195	3	2861	5	24160	gene-KI387_020578,Novel02360,gene-KI387_015766
GO:0030418	nicotianamine biosynthetic process	biological_process	0.012876	0.7195	3	2861	5	24160	gene-KI387_015766,Novel02360,gene-KI387_020578
GO:0046527	glucosyltransferase activity	molecular_function	0.012891	0.7195	27	2861	130	24160	gene-KI387_010785,Novel00663,gene-KI387_034375,gene-KI387_034367,gene-KI387_034364,Novel06221,gene-KI387_034362,gene-KI387_022268,Novel04282,gene-KI387_008966,Novel01974,gene-KI387_040266,gene-KI387_020660,gene-KI387_031805,gene-KI387_032655,Novel00315,gene-KI387_020659,gene-KI387_035372,gene-KI387_008976,gene-KI387_009169,gene-KI387_032496,gene-KI387_034376,gene-KI387_001229,gene-KI387_037661,No…
GO:0031981	nuclear lumen	cellular_component	0.013032	0.7195	71	2861	472	24160	gene-KI387_014286,Novel04146,gene-KI387_015120,gene-KI387_001578,gene-KI387_030667,gene-KI387_010824,gene-KI387_033736,gene-KI387_014278,gene-KI387_013224,Novel04174,gene-KI387_023468,gene-KI387_012099,Novel03044,gene-KI387_032266,gene-KI387_037640,gene-KI387_025069,Novel02662,gene-KI387_005724,gene-KI387_008890,gene-KI387_032265,Novel05975,Novel02565,gene-KI387_019655,Novel01401,gene-KI387_01308…
GO:0031160	spore wall	cellular_component	0.013367	0.72238	2	2861	2	24160	gene-KI387_031775,gene-KI387_023225
GO:0009404	toxin metabolic process	biological_process	0.013427	0.72238	7	2861	22	24160	Novel05534,Novel04456,gene-KI387_006085,Novel04038,gene-KI387_020056,gene-KI387_020811,gene-KI387_022318
GO:0035303	regulation of dephosphorylation	biological_process	0.013693	0.72238	9	2861	32	24160	Novel06145,gene-KI387_017389,Novel05197,Novel03833,gene-KI387_038504,Novel02371,gene-KI387_031700,gene-KI387_022919,gene-KI387_031655
GO:0035304	regulation of protein dephosphorylation	biological_process	0.013693	0.72238	9	2861	32	24160	gene-KI387_017389,gene-KI387_038504,Novel05197,Novel03833,Novel06145,gene-KI387_031655,Novel02371,gene-KI387_031700,gene-KI387_022919
GO:0016311	dephosphorylation	biological_process	0.013952	0.72797	16	2861	71	24160	Novel06145,gene-KI387_014494,gene-KI387_038993,gene-KI387_022919,gene-KI387_005875,Novel02371,gene-KI387_031655,Novel05014,Novel05197,Novel03833,gene-KI387_038504,gene-KI387_017389,gene-KI387_022307,gene-KI387_031700,Novel07598,Novel04010
GO:0047961	glycine N-acyltransferase activity	molecular_function	0.014175	0.73153	2	2861	2	24160	gene-KI387_006164,Novel06397
GO:0044264	cellular polysaccharide metabolic process	biological_process	0.015214	0.74499	27	2861	136	24160	Novel01974,gene-KI387_040266,gene-KI387_031805,gene-KI387_020660,gene-KI387_010785,gene-KI387_034364,gene-KI387_034367,gene-KI387_034375,gene-KI387_034362,gene-KI387_042546,Novel06221,gene-KI387_008966,gene-KI387_022268,Novel04282,gene-KI387_001229,gene-KI387_034376,Novel06222,gene-KI387_037661,gene-KI387_018929,gene-KI387_034363,Novel01329,Novel00315,gene-KI387_032655,gene-KI387_020659,gene-KI38…
GO:0010309	acireductone dioxygenase [iron(II)-requiring] activity	molecular_function	0.015574	0.74499	7	2861	24	24160	Novel06980,Novel01810,gene-KI387_035343,Novel01809,Novel02991,gene-KI387_041190,Novel01489
GO:0003678	DNA helicase activity	molecular_function	0.015802	0.74499	49	2861	247	24160	gene-KI387_032739,gene-KI387_006086,gene-KI387_028904,gene-KI387_015645,gene-KI387_016269,gene-KI387_021462,gene-KI387_032563,gene-KI387_035631,gene-KI387_019448,gene-KI387_035737,gene-KI387_028329,gene-KI387_035628,Novel03542,gene-KI387_016272,gene-KI387_015919,gene-KI387_027955,gene-KI387_044381,gene-KI387_029746,gene-KI387_013319,gene-KI387_027956,Novel01181,gene-KI387_015914,gene-KI387_014873…
GO:0006470	protein dephosphorylation	biological_process	0.01616	0.74499	13	2861	53	24160	Novel04010,gene-KI387_031655,Novel02371,gene-KI387_031700,Novel07598,gene-KI387_022919,gene-KI387_017389,gene-KI387_038504,gene-KI387_014494,Novel03833,Novel05197,Novel05014,Novel06145
GO:0004819	glutamine-tRNA ligase activity	molecular_function	0.016517	0.74499	3	2861	4	24160	gene-KI387_017606,gene-KI387_035795,Novel00820
GO:0006425	glutaminyl-tRNA aminoacylation	biological_process	0.016517	0.74499	3	2861	4	24160	Novel00820,gene-KI387_035795,gene-KI387_017606
GO:0019899	enzyme binding	molecular_function	0.01667	0.74499	26	2861	137	24160	Novel03887,gene-KI387_017703,Novel00918,Novel02995,gene-KI387_028604,gene-KI387_013475,gene-KI387_031655,gene-KI387_035175,Novel06439,gene-KI387_032618,gene-KI387_023863,Novel02371,gene-KI387_032870,gene-KI387_035952,gene-KI387_039905,gene-KI387_030295,gene-KI387_026620,gene-KI387_022673,Novel00381,gene-KI387_009841,gene-KI387_008901,Novel07208,gene-KI387_031700,gene-KI387_004726,gene-KI387_02416…
GO:0006554	lysine catabolic process	biological_process	0.016943	0.74499	4	2861	8	24160	Novel04517,gene-KI387_010648,gene-KI387_040659,gene-KI387_026926
GO:0009068	aspartate family amino acid catabolic process	biological_process	0.016943	0.74499	4	2861	8	24160	gene-KI387_010648,Novel04517,gene-KI387_040659,gene-KI387_026926
GO:0019475	L-lysine catabolic process to acetate	biological_process	0.016943	0.74499	4	2861	8	24160	gene-KI387_040659,gene-KI387_026926,Novel04517,gene-KI387_010648
GO:0019477	L-lysine catabolic process	biological_process	0.016943	0.74499	4	2861	8	24160	Novel04517,gene-KI387_010648,gene-KI387_040659,gene-KI387_026926
GO:0046440	L-lysine metabolic process	biological_process	0.016943	0.74499	4	2861	8	24160	gene-KI387_026926,gene-KI387_040659,Novel04517,gene-KI387_010648
GO:0005654	nucleoplasm	cellular_component	0.017233	0.74499	42	2861	252	24160	gene-KI387_013082,gene-KI387_009072,gene-KI387_030371,gene-KI387_037852,gene-KI387_016525,Novel02886,Novel05975,Novel01399,gene-KI387_019594,gene-KI387_028432,gene-KI387_023200,gene-KI387_016802,Novel02269,Novel03834,gene-KI387_030467,gene-KI387_037293,gene-KI387_002989,Novel04181,Novel05763,gene-KI387_028107,gene-KI387_027350,gene-KI387_014286,gene-KI387_001644,gene-KI387_001578,gene-KI387_03066…
GO:0050776	regulation of immune response	biological_process	0.017284	0.74499	9	2861	34	24160	gene-KI387_012362,gene-KI387_035995,gene-KI387_032037,gene-KI387_024888,Novel07019,gene-KI387_010611,gene-KI387_032563,Novel00919,Novel07020
GO:0010109	regulation of photosynthesis	biological_process	0.017327	0.74499	3	2861	5	24160	gene-KI387_014403,Novel03427,Novel03139
GO:0042548	regulation of photosynthesis, light reaction	biological_process	0.017327	0.74499	3	2861	5	24160	Novel03139,Novel03427,gene-KI387_014403
GO:0042549	photosystem II stabilization	biological_process	0.017327	0.74499	3	2861	5	24160	gene-KI387_014403,Novel03427,Novel03139
GO:0043467	regulation of generation of precursor metabolites and energy	biological_process	0.017327	0.74499	3	2861	5	24160	Novel03427,Novel03139,gene-KI387_014403
GO:0016798	hydrolase activity, acting on glycosyl bonds	molecular_function	0.017591	0.74499	94	2861	624	24160	gene-KI387_011411,gene-KI387_036217,gene-KI387_002015,gene-KI387_015211,gene-KI387_009168,Novel02291,gene-KI387_023319,gene-KI387_002272,gene-KI387_039631,gene-KI387_039683,gene-KI387_000685,gene-KI387_020660,gene-KI387_006349,gene-KI387_042589,gene-KI387_019179,gene-KI387_016032,gene-KI387_004878,gene-KI387_042319,gene-KI387_001487,Novel05016,gene-KI387_020340,gene-KI387_039849,gene-KI387_020640…
GO:0030436	asexual sporulation	biological_process	0.017727	0.74499	5	2861	15	24160	Novel01116,gene-KI387_038708,gene-KI387_022315,gene-KI387_004093,gene-KI387_011014
GO:0009416	response to light stimulus	biological_process	0.017815	0.74499	5	2861	12	24160	gene-KI387_031663,gene-KI387_021666,gene-KI387_029371,Novel06327,gene-KI387_025877
GO:0008094	DNA-dependent ATPase activity	molecular_function	0.017991	0.74499	51	2861	263	24160	gene-KI387_017652,gene-KI387_015142,gene-KI387_031942,gene-KI387_036867,gene-KI387_013526,gene-KI387_035635,Novel04312,gene-KI387_008188,gene-KI387_033190,gene-KI387_001618,gene-KI387_021858,gene-KI387_000412,gene-KI387_013528,gene-KI387_020169,gene-KI387_021013,gene-KI387_003803,gene-KI387_030536,gene-KI387_025096,gene-KI387_033192,Novel03044,gene-KI387_031987,gene-KI387_035694,gene-KI387_035628…
GO:0006325	chromatin organization	biological_process	0.018241	0.74499	36	2861	207	24160	gene-KI387_004945,gene-KI387_019866,gene-KI387_030371,gene-KI387_009072,gene-KI387_043920,gene-KI387_021085,gene-KI387_031888,gene-KI387_032240,gene-KI387_024137,gene-KI387_022830,Novel01779,gene-KI387_035807,gene-KI387_035255,gene-KI387_039089,gene-KI387_025056,Novel06746,gene-KI387_031775,gene-KI387_024023,gene-KI387_023200,gene-KI387_013012,gene-KI387_038078,gene-KI387_039068,Novel04181,Novel0…
GO:0019220	regulation of phosphate metabolic process	biological_process	0.018358	0.74499	14	2861	61	24160	gene-KI387_035175,gene-KI387_031655,gene-KI387_007902,gene-KI387_031700,Novel02371,gene-KI387_003844,gene-KI387_022919,gene-KI387_017389,gene-KI387_038504,Novel03833,Novel05197,gene-KI387_017703,Novel00381,Novel06145
GO:0051174	regulation of phosphorus metabolic process	biological_process	0.018358	0.74499	14	2861	61	24160	Novel03833,gene-KI387_017703,Novel05197,gene-KI387_038504,gene-KI387_017389,Novel06145,Novel00381,gene-KI387_007902,gene-KI387_031655,gene-KI387_035175,gene-KI387_022919,gene-KI387_003844,gene-KI387_031700,Novel02371
GO:0000808	origin recognition complex	cellular_component	0.018963	0.76303	7	2861	27	24160	gene-KI387_032265,gene-KI387_016808,gene-KI387_028987,gene-KI387_033736,Novel01401,gene-KI387_032266,Novel07508
GO:0110165	cellular anatomical entity	cellular_component	0.019518	0.77874	982	2861	7726	24160	gene-KI387_028945,gene-KI387_036854,Novel06969,gene-KI387_005177,Novel03314,gene-KI387_015729,gene-KI387_018076,Novel03018,gene-KI387_037692,Novel07280,gene-KI387_027591,gene-KI387_020342,Novel02576,gene-KI387_009565,Novel01393,gene-KI387_020360,Novel00925,gene-KI387_014278,Novel02050,gene-KI387_020640,gene-KI387_014558,gene-KI387_012598,gene-KI387_001578,gene-KI387_006901,gene-KI387_034567,gene-…
GO:0000152	nuclear ubiquitin ligase complex	cellular_component	0.020398	0.78782	32	2861	166	24160	Novel04701,Novel06748,gene-KI387_019710,gene-KI387_017256,gene-KI387_018611,Novel04705,Novel04534,gene-KI387_025266,Novel01143,Novel01908,gene-KI387_019220,gene-KI387_005741,Novel07453,Novel04773,Novel04378,Novel01498,Novel02679,gene-KI387_029503,gene-KI387_028879,gene-KI387_014603,Novel00925,Novel04713,gene-KI387_025359,Novel06969,Novel04717,Novel02288,gene-KI387_023539,Novel01179,gene-KI387_022…
GO:0005680	anaphase-promoting complex	cellular_component	0.020398	0.78782	32	2861	166	24160	Novel04713,Novel06969,gene-KI387_025359,gene-KI387_014603,gene-KI387_028879,Novel00925,gene-KI387_022918,Novel01179,gene-KI387_032740,Novel07179,gene-KI387_005045,Novel02288,Novel04717,gene-KI387_023539,Novel01908,Novel01143,gene-KI387_025266,gene-KI387_019220,gene-KI387_005741,Novel06748,Novel04701,Novel04534,gene-KI387_017256,gene-KI387_019710,gene-KI387_018611,Novel04705,gene-KI387_029503,Nove…
GO:0031461	cullin-RING ubiquitin ligase complex	cellular_component	0.020398	0.78782	32	2861	166	24160	Novel04713,gene-KI387_025359,Novel06969,gene-KI387_014603,gene-KI387_028879,Novel00925,Novel01179,gene-KI387_022918,Novel07179,gene-KI387_005045,gene-KI387_032740,Novel02288,Novel04717,gene-KI387_023539,Novel01143,gene-KI387_025266,Novel01908,gene-KI387_019220,gene-KI387_005741,Novel06748,Novel04701,gene-KI387_017256,gene-KI387_019710,gene-KI387_018611,Novel04705,Novel04534,gene-KI387_029503,Nove…
GO:0000228	nuclear chromosome	cellular_component	0.020409	0.78782	27	2861	156	24160	gene-KI387_032265,gene-KI387_030667,gene-KI387_034863,Novel07508,gene-KI387_008890,gene-KI387_000228,gene-KI387_015120,Novel04146,gene-KI387_042546,gene-KI387_031285,Novel01401,gene-KI387_009072,gene-KI387_019655,gene-KI387_031655,gene-KI387_023468,gene-KI387_003117,gene-KI387_031884,gene-KI387_012099,gene-KI387_033736,gene-KI387_026395,gene-KI387_023200,gene-KI387_016808,Novel03044,gene-KI387_02…
GO:0043228	non-membrane-bounded organelle	cellular_component	0.020611	0.78919	157	2861	1215	24160	gene-KI387_001317,gene-KI387_000633,gene-KI387_005724,gene-KI387_003463,gene-KI387_000696,Novel06873,gene-KI387_008605,gene-KI387_025751,gene-KI387_015278,gene-KI387_024161,gene-KI387_033296,gene-KI387_010266,gene-KI387_023113,gene-KI387_030855,gene-KI387_025961,Novel06055,gene-KI387_005360,gene-KI387_043349,gene-KI387_020640,Novel02028,gene-KI387_015750,Novel06367,gene-KI387_009618,gene-KI387_01…
GO:0043227	membrane-bounded organelle	cellular_component	0.021318	0.80974	325	2861	2413	24160	gene-KI387_001323,gene-KI387_035201,Novel06149,gene-KI387_016788,gene-KI387_039570,gene-KI387_008999,gene-KI387_039405,gene-KI387_032243,gene-KI387_033210,Novel06197,gene-KI387_012544,gene-KI387_038078,gene-KI387_027035,gene-KI387_017939,gene-KI387_020237,gene-KI387_027350,Novel06492,gene-KI387_022110,Novel01759,gene-KI387_001302,gene-KI387_025056,gene-KI387_005969,gene-KI387_032657,gene-KI387_02…
GO:0051276	chromosome organization	biological_process	0.021567	0.81227	71	2861	452	24160	gene-KI387_025934,Novel06746,gene-KI387_025056,gene-KI387_008720,gene-KI387_008992,gene-KI387_031775,Novel01840,gene-KI387_016802,gene-KI387_025607,gene-KI387_024023,gene-KI387_015500,gene-KI387_023200,gene-KI387_004945,gene-KI387_030371,gene-KI387_018789,gene-KI387_043920,gene-KI387_009072,gene-KI387_021085,gene-KI387_021462,gene-KI387_035255,Novel00556,gene-KI387_022830,gene-KI387_035807,gene-K…
GO:0016701	oxidoreductase activity, acting on single donors with incorporation of molecular oxygen	molecular_function	0.021853	0.81227	28	2861	174	24160	gene-KI387_007087,Novel01810,gene-KI387_030368,gene-KI387_039068,gene-KI387_023251,gene-KI387_007053,gene-KI387_030366,gene-KI387_038469,gene-KI387_007107,gene-KI387_016057,gene-KI387_016055,gene-KI387_030365,gene-KI387_007102,gene-KI387_041190,gene-KI387_007101,gene-KI387_035343,gene-KI387_029373,gene-KI387_012090,Novel02991,Novel01489,gene-KI387_031803,Novel01809,gene-KI387_007051,gene-KI387_00…
GO:0055085	transmembrane transport	biological_process	0.021898	0.81227	200	2861	1389	24160	gene-KI387_014560,gene-KI387_032226,gene-KI387_014593,gene-KI387_027441,Novel03267,gene-KI387_023069,gene-KI387_015120,gene-KI387_037692,gene-KI387_037640,gene-KI387_025348,gene-KI387_028945,gene-KI387_033085,gene-KI387_015093,gene-KI387_033088,Novel06385,gene-KI387_014574,gene-KI387_035224,Novel07254,gene-KI387_037259,gene-KI387_008469,gene-KI387_003620,gene-KI387_002463,gene-KI387_030815,gene-K…
GO:0005576	extracellular region	cellular_component	0.02289	0.83185	106	2861	778	24160	Novel00199,gene-KI387_029746,gene-KI387_011870,gene-KI387_038076,gene-KI387_033567,gene-KI387_014524,gene-KI387_033634,Novel03153,gene-KI387_023931,gene-KI387_004914,gene-KI387_021000,gene-KI387_012321,Novel03458,gene-KI387_006020,gene-KI387_031663,Novel01974,gene-KI387_022759,gene-KI387_016343,gene-KI387_027771,gene-KI387_006735,Novel06478,gene-KI387_011605,gene-KI387_020365,gene-KI387_004916,ge…
GO:0015288	porin activity	molecular_function	0.022951	0.83185	3	2861	6	24160	gene-KI387_031285,gene-KI387_025374,gene-KI387_037640
GO:0022829	wide pore channel activity	molecular_function	0.022951	0.83185	3	2861	6	24160	gene-KI387_025374,gene-KI387_037640,gene-KI387_031285
GO:0008811	chloramphenicol O-acetyltransferase activity	molecular_function	0.023826	0.84567	3	2861	6	24160	gene-KI387_002517,gene-KI387_002529,Novel04243
GO:0043385	mycotoxin metabolic process	biological_process	0.023902	0.84567	4	2861	10	24160	Novel04038,gene-KI387_006085,gene-KI387_020056,gene-KI387_020811
GO:0043386	mycotoxin biosynthetic process	biological_process	0.023902	0.84567	4	2861	10	24160	gene-KI387_006085,Novel04038,gene-KI387_020811,gene-KI387_020056
GO:0016762	xyloglucan:xyloglucosyl transferase activity	molecular_function	0.024223	0.84567	8	2861	29	24160	gene-KI387_020659,gene-KI387_032655,Novel00315,gene-KI387_009169,Novel01974,gene-KI387_001229,gene-KI387_020660,gene-KI387_018929
GO:0048046	apoplast	cellular_component	0.024223	0.84567	8	2861	29	24160	Novel01974,gene-KI387_001229,gene-KI387_018929,gene-KI387_020660,gene-KI387_032655,gene-KI387_020659,Novel00315,gene-KI387_009169
GO:0000151	ubiquitin ligase complex	cellular_component	0.02599	0.89978	32	2861	169	24160	Novel06748,Novel04701,Novel04534,gene-KI387_017256,gene-KI387_019710,Novel04705,gene-KI387_018611,Novel01908,Novel01143,gene-KI387_025266,gene-KI387_019220,gene-KI387_005741,Novel04773,Novel07453,gene-KI387_029503,Novel04378,Novel01498,Novel02679,gene-KI387_028879,gene-KI387_014603,Novel00925,Novel04713,Novel06969,gene-KI387_025359,Novel02288,Novel04717,gene-KI387_023539,gene-KI387_022918,Novel01…
GO:0009521	photosystem	cellular_component	0.026337	0.89978	23	2861	120	24160	gene-KI387_009529,gene-KI387_035223,gene-KI387_019327,Novel01207,gene-KI387_038076,gene-KI387_010208,gene-KI387_007063,gene-KI387_023678,Novel03139,Novel03004,gene-KI387_023127,gene-KI387_033419,gene-KI387_036372,gene-KI387_001503,Novel05585,gene-KI387_014403,Novel03427,gene-KI387_023721,gene-KI387_039857,Novel01759,gene-KI387_031170,gene-KI387_022438,gene-KI387_031000
GO:0009654	photosystem II oxygen evolving complex	cellular_component	0.026342	0.89978	5	2861	16	24160	gene-KI387_036372,gene-KI387_014403,gene-KI387_031000,gene-KI387_023678,gene-KI387_033419
GO:0072350	tricarboxylic acid metabolic process	biological_process	0.027079	0.9001	3	2861	6	24160	Novel02360,gene-KI387_020578,gene-KI387_015766
GO:0072351	tricarboxylic acid biosynthetic process	biological_process	0.027079	0.9001	3	2861	6	24160	Novel02360,gene-KI387_020578,gene-KI387_015766
GO:0009425	bacterial-type flagellum basal body	cellular_component	0.027177	0.9001	3	2861	6	24160	gene-KI387_032237,Novel06367,gene-KI387_037720
GO:0005216	ion channel activity	molecular_function	0.027965	0.9001	43	2861	246	24160	Novel06411,gene-KI387_002697,gene-KI387_019866,Novel01258,gene-KI387_034145,gene-KI387_008890,gene-KI387_017431,gene-KI387_005767,Novel00827,gene-KI387_031011,gene-KI387_015386,Novel01747,Novel02292,gene-KI387_005247,gene-KI387_042319,gene-KI387_023507,gene-KI387_041763,Novel05763,gene-KI387_000413,gene-KI387_015382,gene-KI387_014593,gene-KI387_033175,gene-KI387_021443,gene-KI387_018969,gene-KI38…
GO:0044766	multi-organism transport	biological_process	0.028149	0.9001	10	2861	42	24160	Novel03018,Novel03314,Novel05763,Novel06197,gene-KI387_039451,Novel00988,Novel03019,gene-KI387_013795,gene-KI387_034994,gene-KI387_010283
GO:0046794	transport of virus	biological_process	0.028149	0.9001	10	2861	42	24160	Novel03018,Novel03314,Novel06197,Novel05763,Novel00988,Novel03019,gene-KI387_039451,gene-KI387_013795,gene-KI387_034994,gene-KI387_010283
GO:1902579	multi-organism localization	biological_process	0.028149	0.9001	10	2861	42	24160	Novel03314,Novel03018,Novel00988,gene-KI387_039451,Novel03019,gene-KI387_013795,Novel06197,Novel05763,gene-KI387_034994,gene-KI387_010283
GO:0046173	polyol biosynthetic process	biological_process	0.028607	0.9001	5	2861	20	24160	Novel03847,gene-KI387_001322,gene-KI387_016358,gene-KI387_007364,gene-KI387_028163
GO:0016011	dystroglycan complex	cellular_component	0.029034	0.9001	4	2861	11	24160	gene-KI387_011453,gene-KI387_007551,gene-KI387_035155,Novel06791
GO:0016012	sarcoglycan complex	cellular_component	0.029034	0.9001	4	2861	11	24160	gene-KI387_011453,gene-KI387_007551,gene-KI387_035155,Novel06791
GO:0009341	beta-galactosidase complex	cellular_component	0.029042	0.9001	7	2861	21	24160	gene-KI387_034690,gene-KI387_032970,gene-KI387_016293,gene-KI387_016296,gene-KI387_006901,gene-KI387_032966,gene-KI387_020340
GO:0006113	fermentation	biological_process	0.02913	0.9001	4	2861	9	24160	gene-KI387_010648,Novel04517,gene-KI387_026926,gene-KI387_040659
GO:0019665	anaerobic amino acid catabolic process	biological_process	0.02913	0.9001	4	2861	9	24160	gene-KI387_040659,gene-KI387_026926,gene-KI387_010648,Novel04517
GO:0019666	nitrogenous compound fermentation	biological_process	0.02913	0.9001	4	2861	9	24160	Novel04517,gene-KI387_010648,gene-KI387_026926,gene-KI387_040659
GO:0009314	response to radiation	biological_process	0.029301	0.9001	5	2861	14	24160	gene-KI387_021666,gene-KI387_029371,gene-KI387_031663,gene-KI387_025877,Novel06327
GO:0019748	secondary metabolic process	biological_process	0.029461	0.9001	10	2861	41	24160	Novel04456,gene-KI387_009946,gene-KI387_020056,gene-KI387_022318,gene-KI387_010275,Novel05534,gene-KI387_006085,Novel04038,gene-KI387_020811,gene-KI387_010277
GO:0030435	sporulation resulting in formation of a cellular spore	biological_process	0.029705	0.9001	3	2861	7	24160	gene-KI387_031775,gene-KI387_036255,gene-KI387_023225
GO:0031399	regulation of protein modification process	biological_process	0.03001	0.9001	13	2861	59	24160	gene-KI387_003844,gene-KI387_022919,Novel02371,gene-KI387_031700,gene-KI387_031655,gene-KI387_035175,Novel06145,Novel00381,Novel05197,Novel03833,gene-KI387_017703,gene-KI387_038504,gene-KI387_017389
GO:0010921	regulation of phosphatase activity	biological_process	0.030142	0.9001	8	2861	31	24160	gene-KI387_022919,Novel02371,gene-KI387_031700,gene-KI387_031655,Novel03833,Novel05197,gene-KI387_038504,gene-KI387_017389
GO:0043666	regulation of phosphoprotein phosphatase activity	biological_process	0.030142	0.9001	8	2861	31	24160	Novel02371,gene-KI387_031700,gene-KI387_022919,gene-KI387_031655,gene-KI387_017389,Novel05197,Novel03833,gene-KI387_038504
GO:0004640	phosphoribosylanthranilate isomerase activity	molecular_function	0.030781	0.91342	2	2861	3	24160	gene-KI387_019194,gene-KI387_035478
GO:0009627	systemic acquired resistance	biological_process	0.032211	0.93828	4	2861	14	24160	gene-KI387_012362,Novel07020,gene-KI387_010611,Novel07019
GO:0009814	defense response, incompatible interaction	biological_process	0.032211	0.93828	4	2861	14	24160	gene-KI387_012362,gene-KI387_010611,Novel07019,Novel07020
GO:0010112	regulation of systemic acquired resistance	biological_process	0.032211	0.93828	4	2861	14	24160	gene-KI387_012362,gene-KI387_010611,Novel07019,Novel07020
GO:0006338	chromatin remodeling	biological_process	0.032734	0.9477	21	2861	120	24160	gene-KI387_031775,gene-KI387_024023,gene-KI387_025056,Novel06746,Novel03044,Novel04744,Novel05116,gene-KI387_032240,gene-KI387_021404,gene-KI387_039089,gene-KI387_025239,gene-KI387_021515,gene-KI387_035255,gene-KI387_035806,Novel01779,gene-KI387_035807,gene-KI387_039068,gene-KI387_038078,gene-KI387_004945,gene-KI387_013012,Novel05545
GO:0006935	chemotaxis	biological_process	0.033447	0.96245	8	2861	33	24160	gene-KI387_013946,Novel03431,gene-KI387_009420,gene-KI387_024993,gene-KI387_032237,Novel06367,gene-KI387_026490,gene-KI387_034676
GO:0004553	hydrolase activity, hydrolyzing O-glycosyl compounds	molecular_function	0.033813	0.96713	86	2861	580	24160	gene-KI387_007210,gene-KI387_018929,gene-KI387_034009,gene-KI387_032970,gene-KI387_018108,gene-KI387_032581,gene-KI387_022437,gene-KI387_018107,gene-KI387_009169,gene-KI387_014523,gene-KI387_002455,gene-KI387_024587,gene-KI387_020659,gene-KI387_032655,gene-KI387_038936,gene-KI387_028091,gene-KI387_025596,gene-KI387_001228,gene-KI387_030729,gene-KI387_014670,gene-KI387_006901,gene-KI387_000674,gen…
GO:0004386	helicase activity	molecular_function	0.034419	0.96979	65	2861	362	24160	gene-KI387_019448,gene-KI387_035737,gene-KI387_021105,gene-KI387_035628,gene-KI387_032739,gene-KI387_008611,gene-KI387_007242,gene-KI387_013319,gene-KI387_014873,gene-KI387_015914,Novel02653,gene-KI387_011451,gene-KI387_035637,gene-KI387_033187,gene-KI387_006229,gene-KI387_019050,gene-KI387_036867,Novel06535,gene-KI387_017652,gene-KI387_021858,gene-KI387_000412,gene-KI387_033747,gene-KI387_021115…
GO:0046165	alcohol biosynthetic process	biological_process	0.034729	0.96979	5	2861	21	24160	gene-KI387_028163,gene-KI387_007364,gene-KI387_016358,gene-KI387_001322,Novel03847
GO:0051274	beta-glucan biosynthetic process	biological_process	0.034839	0.96979	17	2861	81	24160	gene-KI387_035372,gene-KI387_008976,gene-KI387_037661,Novel06222,gene-KI387_034363,gene-KI387_034376,Novel06221,gene-KI387_034362,gene-KI387_022268,Novel04282,gene-KI387_008966,gene-KI387_010785,gene-KI387_034375,gene-KI387_034367,gene-KI387_034364,gene-KI387_040266,gene-KI387_031805
GO:0032774	RNA biosynthetic process	biological_process	0.035084	0.96979	261	2861	1928	24160	gene-KI387_019667,gene-KI387_017616,gene-KI387_023573,gene-KI387_009618,gene-KI387_020471,Novel06837,gene-KI387_033861,gene-KI387_037006,gene-KI387_023678,gene-KI387_003620,gene-KI387_021893,gene-KI387_013224,gene-KI387_014912,gene-KI387_005551,gene-KI387_010672,Novel01707,gene-KI387_019312,gene-KI387_013030,Novel06329,gene-KI387_041190,gene-KI387_018529,gene-KI387_009724,gene-KI387_022888,gene-K…
GO:0004565	beta-galactosidase activity	molecular_function	0.035132	0.96979	7	2861	22	24160	gene-KI387_016296,gene-KI387_006901,gene-KI387_016293,gene-KI387_032970,gene-KI387_034690,gene-KI387_020340,gene-KI387_032966
GO:0015925	galactosidase activity	molecular_function	0.035132	0.96979	7	2861	22	24160	gene-KI387_006901,gene-KI387_016296,gene-KI387_016293,gene-KI387_032970,gene-KI387_034690,gene-KI387_020340,gene-KI387_032966
GO:0032392	DNA geometric change	biological_process	0.036553	0.99744	3	2861	6	24160	gene-KI387_013606,Novel01840,gene-KI387_008720
GO:0032508	DNA duplex unwinding	biological_process	0.036553	0.99744	3	2861	6	24160	gene-KI387_013606,Novel01840,gene-KI387_008720
GO:0004506	squalene monooxygenase activity	molecular_function	0.036813	0.99878	6	2861	19	24160	gene-KI387_039344,gene-KI387_027709,gene-KI387_024848,gene-KI387_008720,gene-KI387_010531,gene-KI387_008719
GO:0005975	carbohydrate metabolic process	biological_process	0.038553	1	154	2861	1060	24160	gene-KI387_025667,gene-KI387_010785,gene-KI387_001232,gene-KI387_005875,Novel01974,gene-KI387_040266,Novel06909,Novel05638,gene-KI387_026262,Novel00598,gene-KI387_034376,gene-KI387_009173,Novel01329,gene-KI387_032582,Novel04482,gene-KI387_032966,gene-KI387_042546,gene-KI387_017209,gene-KI387_028163,gene-KI387_001102,gene-KI387_032433,gene-KI387_039361,gene-KI387_020237,Novel03644,gene-KI387_02091…
GO:0000818	nuclear MIS12/MIND complex	cellular_component	0.038871	1	3	2861	9	24160	gene-KI387_019655,gene-KI387_000228,gene-KI387_042546
GO:0006351	transcription, DNA-templated	biological_process	0.038876	1	259	2861	1920	24160	gene-KI387_008144,gene-KI387_009389,gene-KI387_006085,gene-KI387_032288,gene-KI387_001644,gene-KI387_019194,gene-KI387_025940,gene-KI387_011095,gene-KI387_001385,gene-KI387_028107,gene-KI387_042546,gene-KI387_013946,gene-KI387_016802,gene-KI387_025607,gene-KI387_005247,gene-KI387_015188,gene-KI387_031529,gene-KI387_020524,gene-KI387_000483,gene-KI387_007873,gene-KI387_001747,gene-KI387_015337,Nov…
GO:0097659	nucleic acid-templated transcription	biological_process	0.038876	1	259	2861	1920	24160	gene-KI387_037293,gene-KI387_035222,gene-KI387_026122,Novel07508,gene-KI387_021515,gene-KI387_038993,gene-KI387_020416,gene-KI387_033495,gene-KI387_002988,gene-KI387_005203,Novel00503,Novel06979,gene-KI387_033192,gene-KI387_007190,Novel00415,gene-KI387_028904,gene-KI387_028659,gene-KI387_002313,Novel00556,gene-KI387_017455,gene-KI387_039089,gene-KI387_012843,gene-KI387_016311,Novel03045,gene-KI38…
GO:0070449	elongin complex	cellular_component	0.038915	1	3	2861	8	24160	gene-KI387_025940,gene-KI387_016525,Novel04174
GO:0050830	defense response to Gram-positive bacterium	biological_process	0.039157	1	3	2861	7	24160	Novel04958,gene-KI387_020323,gene-KI387_018047
GO:0000049	tRNA binding	molecular_function	0.039756	1	7	2861	24	24160	gene-KI387_013169,Novel06058,gene-KI387_027887,Novel07556,gene-KI387_030368,Novel05363,Novel00042
GO:0004512	inositol-3-phosphate synthase activity	molecular_function	0.039804	1	4	2861	15	24160	Novel03847,gene-KI387_016358,gene-KI387_007364,gene-KI387_028163
GO:0006021	inositol biosynthetic process	biological_process	0.039804	1	4	2861	15	24160	Novel03847,gene-KI387_016358,gene-KI387_007364,gene-KI387_028163
GO:0000790	nuclear chromatin	cellular_component	0.039947	1	7	2861	21	24160	gene-KI387_012099,gene-KI387_031884,gene-KI387_030667,gene-KI387_008890,gene-KI387_009072,gene-KI387_023200,Novel03044
GO:0008519	ammonium transmembrane transporter activity	molecular_function	0.040222	1	5	2861	14	24160	gene-KI387_010936,gene-KI387_033806,Novel06978,gene-KI387_039570,gene-KI387_037407
GO:0015696	ammonium transport	biological_process	0.040222	1	5	2861	14	24160	gene-KI387_010936,gene-KI387_033806,Novel06978,gene-KI387_037407,gene-KI387_039570
GO:0043232	intracellular non-membrane-bounded organelle	cellular_component	0.040544	1	149	2861	1179	24160	gene-KI387_026029,gene-KI387_030436,gene-KI387_031655,gene-KI387_034390,Novel02532,gene-KI387_015456,gene-KI387_042546,gene-KI387_037906,gene-KI387_020237,gene-KI387_025940,gene-KI387_019194,gene-KI387_009389,gene-KI387_026114,gene-KI387_018037,Novel04836,gene-KI387_000695,Novel01094,gene-KI387_031285,gene-KI387_009072,gene-KI387_043920,gene-KI387_002679,Novel06226,Novel01549,gene-KI387_026648,ge…
GO:0044262	cellular carbohydrate metabolic process	biological_process	0.041097	1	36	2861	208	24160	gene-KI387_035372,Novel01329,gene-KI387_037661,gene-KI387_034376,gene-KI387_008966,gene-KI387_022268,gene-KI387_034362,gene-KI387_005875,gene-KI387_034364,gene-KI387_034375,gene-KI387_010785,gene-KI387_020660,gene-KI387_040266,Novel02995,gene-KI387_016358,Novel01974,gene-KI387_032496,Novel03847,gene-KI387_009169,gene-KI387_008976,gene-KI387_032655,Novel00315,gene-KI387_020659,Novel04174,gene-KI38…
GO:0016298	lipase activity	molecular_function	0.042901	1	6	2861	21	24160	gene-KI387_004989,Novel03194,gene-KI387_034877,gene-KI387_032107,Novel06441,gene-KI387_021407
GO:0051087	chaperone binding	molecular_function	0.043016	1	9	2861	40	24160	gene-KI387_034674,Novel00270,gene-KI387_030966,gene-KI387_008435,Novel05899,gene-KI387_038049,gene-KI387_014264,gene-KI387_000186,gene-KI387_003620
GO:0015079	potassium ion transmembrane transporter activity	molecular_function	0.043172	1	16	2861	74	24160	Novel06411,gene-KI387_019866,gene-KI387_022986,gene-KI387_009072,gene-KI387_023574,gene-KI387_034152,gene-KI387_009073,gene-KI387_004834,gene-KI387_008450,Novel00827,gene-KI387_015726,gene-KI387_015725,gene-KI387_038094,gene-KI387_032296,gene-KI387_030440,gene-KI387_014599
GO:0015718	monocarboxylic acid transport	biological_process	0.04322	1	5	2861	19	24160	gene-KI387_021407,gene-KI387_015775,gene-KI387_005704,Novel03194,Novel04001
GO:0034637	cellular carbohydrate biosynthetic process	biological_process	0.044461	1	25	2861	138	24160	gene-KI387_040266,Novel02995,gene-KI387_016358,gene-KI387_031805,gene-KI387_028163,gene-KI387_034362,Novel06221,gene-KI387_008966,Novel04282,gene-KI387_022268,gene-KI387_010785,gene-KI387_007364,gene-KI387_034364,gene-KI387_034375,gene-KI387_034367,Novel06222,gene-KI387_037661,Novel04174,gene-KI387_034363,Novel01329,gene-KI387_034376,gene-KI387_023610,Novel03847,gene-KI387_008976,gene-KI387_035372
GO:0051273	beta-glucan metabolic process	biological_process	0.045197	1	17	2861	83	24160	gene-KI387_034376,gene-KI387_034363,Novel06222,gene-KI387_037661,gene-KI387_035372,gene-KI387_008976,gene-KI387_031805,gene-KI387_040266,gene-KI387_034375,gene-KI387_034367,gene-KI387_034364,gene-KI387_010785,gene-KI387_022268,Novel04282,gene-KI387_008966,Novel06221,gene-KI387_034362
GO:0003677	DNA binding	molecular_function	0.045223	1	287	2861	2134	24160	gene-KI387_037910,gene-KI387_023728,gene-KI387_020524,Novel05041,Novel02292,Novel05014,gene-KI387_005247,gene-KI387_015188,gene-KI387_010074,gene-KI387_025607,gene-KI387_026804,gene-KI387_019178,gene-KI387_035952,gene-KI387_011802,gene-KI387_031421,gene-KI387_015067,Novel00609,gene-KI387_027179,gene-KI387_043920,gene-KI387_025203,gene-KI387_007873,gene-KI387_001747,gene-KI387_035996,Novel02216,ge…
GO:0035257	nuclear hormone receptor binding	molecular_function	0.04553	1	3	2861	7	24160	gene-KI387_023573,Novel04360,gene-KI387_041451
GO:0051427	hormone receptor binding	molecular_function	0.04553	1	3	2861	7	24160	gene-KI387_023573,Novel04360,gene-KI387_041451
GO:0061629	RNA polymerase II-specific DNA-binding transcription factor binding	molecular_function	0.04553	1	3	2861	7	24160	gene-KI387_041451,Novel04360,gene-KI387_023573
GO:0140297	DNA-binding transcription factor binding	molecular_function	0.04553	1	3	2861	7	24160	gene-KI387_023573,Novel04360,gene-KI387_041451
GO:0043269	regulation of ion transport	biological_process	0.046177	1	7	2861	27	24160	gene-KI387_027826,Novel00713,Novel07095,gene-KI387_022324,Novel03194,Novel02508,gene-KI387_014325
GO:0061630	ubiquitin protein ligase activity	molecular_function	0.046234	1	15	2861	72	24160	gene-KI387_002957,gene-KI387_005741,gene-KI387_002203,Novel01143,gene-KI387_025348,Novel04713,gene-KI387_025266,gene-KI387_023887,gene-KI387_019710,gene-KI387_023539,Novel04773,Novel01051,Novel06748,Novel07453,Novel04102
GO:0061659	ubiquitin-like protein ligase activity	molecular_function	0.046234	1	15	2861	72	24160	gene-KI387_025266,Novel04713,Novel01143,gene-KI387_025348,gene-KI387_002203,gene-KI387_005741,gene-KI387_002957,Novel04773,Novel01051,Novel07453,Novel06748,Novel04102,gene-KI387_019710,gene-KI387_023539,gene-KI387_023887
GO:0006261	DNA-dependent DNA replication	biological_process	0.047564	1	22	2861	123	24160	gene-KI387_021515,Novel07508,Novel04537,gene-KI387_029873,gene-KI387_013606,gene-KI387_002324,gene-KI387_031520,gene-KI387_027179,gene-KI387_028659,gene-KI387_022036,gene-KI387_002376,Novel02371,gene-KI387_012566,Novel06055,gene-KI387_003117,Novel01840,Novel06748,gene-KI387_015188,gene-KI387_005247,gene-KI387_008720,gene-KI387_020524,gene-KI387_020747
GO:0003674	molecular_function	molecular_function	0.04771	1	2512	2861	20455	24160	gene-KI387_000646,gene-KI387_017703,gene-KI387_012988,gene-KI387_023866,gene-KI387_035311,gene-KI387_039626,gene-KI387_023573,Novel04287,gene-KI387_027065,Novel06222,Novel05430,gene-KI387_026620,gene-KI387_013224,gene-KI387_025348,gene-KI387_019918,Novel05714,gene-KI387_007310,gene-KI387_041824,Novel06768,gene-KI387_020660,gene-KI387_040403,gene-KI387_001001,Novel06107,gene-KI387_000697,gene-KI38…
044,gene-KI387_001874,gene-KI387_039451,Novel07258,Novel03714,gene-KI387_032581,gene-KI387_001222,gene-KI387_008818,gene-KI387_033941,gene-KI387_030365,gene-KI387_033369,gene-KI387_019866,gene-KI387_034362,gene-KI387_008394,gene-KI387_035455,gene-KI387_022719,gene-KI387_002015,gene-KI387_002356,gene-KI387_004878,gene-KI387_008975,gene-KI387_016808,Novel05257,gene-KI387_001513,gene-KI387_025940,ge…
GO:0008023	transcription elongation factor complex	cellular_component	0.047837	1	6	2861	23	24160	gene-KI387_025940,gene-KI387_016525,Novel04174,gene-KI387_030371,gene-KI387_030467,gene-KI387_010824
GO:0017016	Ras GTPase binding	molecular_function	0.047874	1	12	2861	53	24160	gene-KI387_009841,gene-KI387_008901,Novel07208,Novel06439,gene-KI387_004726,gene-KI387_024161,gene-KI387_023863,gene-KI387_035952,Novel03887,gene-KI387_030295,Novel00918,gene-KI387_028604
GO:0031267	small GTPase binding	molecular_function	0.047874	1	12	2861	53	24160	gene-KI387_008901,gene-KI387_009841,Novel07208,Novel06439,gene-KI387_035952,gene-KI387_023863,gene-KI387_004726,gene-KI387_024161,Novel00918,Novel03887,gene-KI387_030295,gene-KI387_028604
GO:0005905	clathrin-coated pit	cellular_component	0.048793	1	3	2861	8	24160	Novel06492,gene-KI387_006267,gene-KI387_013376
GO:0012510	trans-Golgi network transport vesicle membrane	cellular_component	0.048793	1	3	2861	8	24160	gene-KI387_006267,gene-KI387_013376,Novel06492
GO:0030125	clathrin vesicle coat	cellular_component	0.048793	1	3	2861	8	24160	Novel06492,gene-KI387_006267,gene-KI387_013376
GO:0030130	clathrin coat of trans-Golgi network vesicle	cellular_component	0.048793	1	3	2861	8	24160	Novel06492,gene-KI387_006267,gene-KI387_013376
GO:0030132	clathrin coat of coated pit	cellular_component	0.048793	1	3	2861	8	24160	Novel06492,gene-KI387_013376,gene-KI387_006267
GO:0030136	clathrin-coated vesicle	cellular_component	0.048793	1	3	2861	8	24160	gene-KI387_013376,gene-KI387_006267,Novel06492
GO:0030140	trans-Golgi network transport vesicle	cellular_component	0.048793	1	3	2861	8	24160	Novel06492,gene-KI387_006267,gene-KI387_013376
GO:0030665	clathrin-coated vesicle membrane	cellular_component	0.048793	1	3	2861	8	24160	Novel06492,gene-KI387_006267,gene-KI387_013376
GO:0019684	photosynthesis, light reaction	biological_process	0.049308	1	10	2861	47	24160	gene-KI387_018529,gene-KI387_014403,gene-KI387_018528,gene-KI387_009311,gene-KI387_034765,gene-KI387_014405,gene-KI387_037130,gene-KI387_015120,Novel03139,Novel03427
GO:0034357	photosynthetic membrane	cellular_component	0.0502	1	24	2861	136	24160	gene-KI387_033419,gene-KI387_036372,gene-KI387_001503,Novel05585,gene-KI387_014403,Novel03427,gene-KI387_023721,gene-KI387_039857,gene-KI387_031170,Novel01759,gene-KI387_022438,gene-KI387_031000,gene-KI387_009529,gene-KI387_035223,gene-KI387_019327,gene-KI387_016931,Novel01207,gene-KI387_038076,gene-KI387_007063,gene-KI387_010208,gene-KI387_023678,Novel03139,Novel03004,gene-KI387_023127
GO:0005783	endoplasmic reticulum	cellular_component	0.050266	1	25	2861	139	24160	gene-KI387_039068,gene-KI387_012544,gene-KI387_037852,gene-KI387_042546,gene-KI387_023573,gene-KI387_032732,Novel05969,Novel02306,gene-KI387_030500,gene-KI387_031655,gene-KI387_020056,gene-KI387_002517,gene-KI387_020852,Novel07508,gene-KI387_032682,Novel02216,Novel00743,gene-KI387_040682,gene-KI387_015729,gene-KI387_001527,gene-KI387_030994,gene-KI387_032243,gene-KI387_018291,Novel02613,gene-KI38…
GO:0035251	UDP-glucosyltransferase activity	molecular_function	0.050566	1	19	2861	95	24160	gene-KI387_035372,gene-KI387_008976,gene-KI387_032496,gene-KI387_034376,gene-KI387_037661,Novel06222,gene-KI387_034363,gene-KI387_010785,gene-KI387_034367,gene-KI387_034375,Novel00663,gene-KI387_034364,Novel06221,gene-KI387_034362,gene-KI387_022268,Novel04282,gene-KI387_008966,gene-KI387_040266,gene-KI387_031805
GO:0097196	Shu complex	cellular_component	0.050594	1	2	2861	3	24160	gene-KI387_003567,Novel06718
GO:1990391	DNA repair complex	cellular_component	0.050594	1	2	2861	3	24160	gene-KI387_003567,Novel06718
GO:0042330	taxis	biological_process	0.05075	1	8	2861	35	24160	gene-KI387_026490,Novel06367,gene-KI387_032237,gene-KI387_034676,gene-KI387_013946,gene-KI387_024993,gene-KI387_009420,Novel03431
GO:0006289	nucleotide-excision repair	biological_process	0.052268	1	7	2861	28	24160	gene-KI387_001302,gene-KI387_026122,Novel01416,gene-KI387_022309,Novel02730,gene-KI387_006717,Novel06724
GO:0009250	glucan biosynthetic process	biological_process	0.052749	1	17	2861	85	24160	gene-KI387_008966,Novel04282,gene-KI387_022268,gene-KI387_034362,Novel06221,gene-KI387_034364,gene-KI387_034375,gene-KI387_034367,gene-KI387_010785,gene-KI387_031805,gene-KI387_040266,gene-KI387_008976,gene-KI387_035372,gene-KI387_034363,Novel06222,gene-KI387_037661,gene-KI387_034376
GO:0009507	chloroplast	cellular_component	0.052843	1	5	2861	18	24160	gene-KI387_022110,gene-KI387_016045,gene-KI387_023992,gene-KI387_023721,gene-KI387_010208
GO:0009536	plastid	cellular_component	0.052843	1	5	2861	18	24160	gene-KI387_023721,gene-KI387_010208,gene-KI387_022110,gene-KI387_023992,gene-KI387_016045
GO:0000118	histone deacetylase complex	cellular_component	0.053112	1	5	2861	13	24160	gene-KI387_023200,gene-KI387_009072,gene-KI387_030667,gene-KI387_012099,gene-KI387_031884
GO:0070823	HDA1 complex	cellular_component	0.053112	1	5	2861	13	24160	gene-KI387_009072,gene-KI387_023200,gene-KI387_030667,gene-KI387_012099,gene-KI387_031884
GO:0048308	organelle inheritance	biological_process	0.055082	1	4	2861	11	24160	gene-KI387_035603,gene-KI387_026395,gene-KI387_019052,gene-KI387_006148
GO:0015979	photosynthesis	biological_process	0.055761	1	33	2861	195	24160	gene-KI387_014403,gene-KI387_034765,gene-KI387_036372,Novel01759,gene-KI387_022438,gene-KI387_031000,gene-KI387_015120,gene-KI387_039857,Novel03427,gene-KI387_023721,gene-KI387_019327,Novel01207,gene-KI387_035223,gene-KI387_003758,Novel03139,gene-KI387_007063,gene-KI387_023678,gene-KI387_018528,gene-KI387_001503,Novel05585,gene-KI387_033419,gene-KI387_014405,gene-KI387_031170,gene-KI387_037130,ge…
GO:0016051	carbohydrate biosynthetic process	biological_process	0.056383	1	38	2861	231	24160	gene-KI387_026381,gene-KI387_040266,Novel02995,gene-KI387_016358,gene-KI387_008045,gene-KI387_034364,gene-KI387_016264,gene-KI387_034375,gene-KI387_010785,gene-KI387_008966,gene-KI387_022268,gene-KI387_034362,gene-KI387_034376,Novel03831,Novel01329,gene-KI387_037661,gene-KI387_012562,gene-KI387_035372,gene-KI387_002763,gene-KI387_028163,gene-KI387_039361,gene-KI387_031805,gene-KI387_007364,gene-K…
GO:0030178	negative regulation of Wnt signaling pathway	biological_process	0.056948	1	3	2861	9	24160	gene-KI387_015382,gene-KI387_015378,gene-KI387_015386
GO:0000723	telomere maintenance	biological_process	0.05727	1	12	2861	52	24160	gene-KI387_016802,gene-KI387_015142,gene-KI387_033187,gene-KI387_017652,gene-KI387_021462,gene-KI387_000412,gene-KI387_033192,gene-KI387_021013,gene-KI387_021858,gene-KI387_025934,gene-KI387_033190,gene-KI387_008188
GO:0032200	telomere organization	biological_process	0.05727	1	12	2861	52	24160	gene-KI387_021462,gene-KI387_000412,gene-KI387_016802,gene-KI387_015142,gene-KI387_017652,gene-KI387_033187,gene-KI387_021858,gene-KI387_025934,gene-KI387_033190,gene-KI387_008188,gene-KI387_033192,gene-KI387_021013
GO:0060249	anatomical structure homeostasis	biological_process	0.05727	1	12	2861	52	24160	gene-KI387_021013,gene-KI387_033192,gene-KI387_008188,gene-KI387_033190,gene-KI387_025934,gene-KI387_021858,gene-KI387_017652,gene-KI387_033187,gene-KI387_015142,gene-KI387_016802,gene-KI387_000412,gene-KI387_021462
GO:0016709	oxidoreductase activity, acting on paired donors, with incorporation or reduction of molecular oxygen, NAD(P)H as one donor, and incorporation of one atom of oxygen	molecular_function	0.058522	1	12	2861	58	24160	gene-KI387_039683,gene-KI387_039344,gene-KI387_010103,Novel02655,gene-KI387_027709,gene-KI387_010531,Novel03256,gene-KI387_010104,gene-KI387_024848,gene-KI387_008719,gene-KI387_008720,Novel02656
GO:0006787	porphyrin-containing compound catabolic process	biological_process	0.05862	1	4	2861	12	24160	gene-KI387_019587,gene-KI387_017117,gene-KI387_033828,Novel04287
GO:0033015	tetrapyrrole catabolic process	biological_process	0.05862	1	4	2861	12	24160	gene-KI387_019587,gene-KI387_017117,gene-KI387_033828,Novel04287
GO:0046873	metal ion transmembrane transporter activity	molecular_function	0.059189	1	43	2861	264	24160	gene-KI387_022986,gene-KI387_033175,gene-KI387_024899,gene-KI387_009073,gene-KI387_023574,gene-KI387_014558,gene-KI387_037067,Novel05763,gene-KI387_037724,Novel06026,gene-KI387_029421,Novel04931,gene-KI387_004834,gene-KI387_025376,Novel05469,gene-KI387_026642,gene-KI387_032296,gene-KI387_015726,gene-KI387_028945,gene-KI387_038094,gene-KI387_005769,Novel02199,gene-KI387_036725,gene-KI387_033736,ge…
GO:0032101	regulation of response to external stimulus	biological_process	0.059848	1	7	2861	30	24160	Novel07020,gene-KI387_009420,gene-KI387_010611,Novel07019,Novel03173,gene-KI387_034676,gene-KI387_012362
GO:0030658	transport vesicle membrane	cellular_component	0.060337	1	12	2861	59	24160	gene-KI387_003034,gene-KI387_000035,gene-KI387_006267,Novel05114,gene-KI387_020721,Novel06749,gene-KI387_029452,Novel03486,gene-KI387_013376,gene-KI387_000561,gene-KI387_020360,Novel06492
GO:0006260	DNA replication	biological_process	0.060479	1	65	2861	453	24160	gene-KI387_020365,gene-KI387_031285,gene-KI387_028659,gene-KI387_027179,gene-KI387_015645,gene-KI387_008966,gene-KI387_006086,gene-KI387_028329,gene-KI387_025203,gene-KI387_032563,gene-KI387_028987,gene-KI387_020524,gene-KI387_008720,gene-KI387_010074,Novel01840,gene-KI387_034122,Novel06748,Novel00314,gene-KI387_005247,Novel02292,gene-KI387_015188,gene-KI387_031520,gene-KI387_031655,gene-KI387_02…
GO:0043752	adenosylcobinamide kinase activity	molecular_function	0.060814	1	2	2861	3	24160	Novel03075,gene-KI387_006703
GO:0051188	obsolete cofactor biosynthetic process	biological_process	0.060814	1	2	2861	3	24160	gene-KI387_006703,Novel03075
GO:0009606	tropism	biological_process	0.06158	1	2	2861	3	24160	Novel02429,Novel03483
GO:0010274	hydrotropism	biological_process	0.06158	1	2	2861	3	24160	Novel02429,Novel03483
GO:0031099	regeneration	biological_process	0.061805	1	2	2861	3	24160	gene-KI387_023574,gene-KI387_024352
GO:0042246	tissue regeneration	biological_process	0.061805	1	2	2861	3	24160	gene-KI387_024352,gene-KI387_023574
GO:0048589	developmental growth	biological_process	0.061805	1	2	2861	3	24160	gene-KI387_024352,gene-KI387_023574
GO:0005506	iron ion binding	molecular_function	0.061832	1	89	2861	599	24160	gene-KI387_027180,gene-KI387_032550,Novel05710,gene-KI387_018245,gene-KI387_035758,gene-KI387_015284,gene-KI387_026276,Novel00820,gene-KI387_032381,gene-KI387_026202,gene-KI387_022330,gene-KI387_009338,gene-KI387_038914,gene-KI387_037536,Novel02093,gene-KI387_006378,gene-KI387_029385,gene-KI387_002607,gene-KI387_035972,gene-KI387_026031,gene-KI387_026278,Novel00012,Novel05187,gene-KI387_030688,ge…
GO:0006333	chromatin assembly or disassembly	biological_process	0.061844	1	6	2861	30	24160	gene-KI387_022830,gene-KI387_043920,gene-KI387_037906,gene-KI387_032240,gene-KI387_024137,gene-KI387_031888
GO:0005575	cellular_component	cellular_component	0.062426	1	1025	2861	8203	24160	Novel02114,gene-KI387_001527,gene-KI387_000175,gene-KI387_007902,gene-KI387_010208,gene-KI387_037740,gene-KI387_032739,Novel06159,gene-KI387_036217,Novel04864,Novel06145,gene-KI387_003855,gene-KI387_029392,gene-KI387_005767,gene-KI387_024720,Novel00315,Novel06749,gene-KI387_000780,gene-KI387_033881,gene-KI387_025887,gene-KI387_007119,gene-KI387_010570,gene-KI387_034367,gene-KI387_033897,gene-KI38…
GO:0043624	cellular protein complex disassembly	biological_process	0.062818	1	7	2861	33	24160	gene-KI387_018108,Novel02165,gene-KI387_026648,gene-KI387_001044,gene-KI387_015278,gene-KI387_008262,gene-KI387_000492
GO:0006281	DNA repair	biological_process	0.062916	1	74	2861	456	24160	gene-KI387_021858,gene-KI387_036867,gene-KI387_017652,gene-KI387_003803,Novel03044,Novel06749,gene-KI387_000412,gene-KI387_032603,gene-KI387_023924,gene-KI387_032739,gene-KI387_022309,gene-KI387_013934,gene-KI387_024377,gene-KI387_019448,Novel02309,gene-KI387_014494,gene-KI387_006717,Novel02291,gene-KI387_035737,gene-KI387_034862,gene-KI387_015914,gene-KI387_014873,gene-KI387_013319,gene-KI387_03…
GO:0038179	neurotrophin signaling pathway	biological_process	0.064027	1	1	2861	1	24160	gene-KI387_030894
GO:0048011	neurotrophin TRK receptor signaling pathway	biological_process	0.064027	1	1	2861	1	24160	gene-KI387_030894
GO:0051213	dioxygenase activity	molecular_function	0.064054	1	26	2861	181	24160	gene-KI387_007087,Novel01810,gene-KI387_039068,gene-KI387_030368,gene-KI387_007053,gene-KI387_038469,gene-KI387_030366,gene-KI387_016057,gene-KI387_007107,gene-KI387_016055,gene-KI387_030365,gene-KI387_007102,gene-KI387_041190,gene-KI387_007101,gene-KI387_029373,gene-KI387_035343,gene-KI387_012090,Novel02991,Novel01489,Novel01809,gene-KI387_007051,gene-KI387_012085,gene-KI387_007035,gene-KI387_04…
GO:0045787	positive regulation of cell cycle	biological_process	0.064452	1	2	2861	3	24160	Novel04010,Novel07598
GO:0090068	positive regulation of cell cycle process	biological_process	0.064452	1	2	2861	3	24160	Novel04010,Novel07598
GO:1901989	positive regulation of cell cycle phase transition	biological_process	0.064452	1	2	2861	3	24160	Novel07598,Novel04010
GO:1902751	positive regulation of cell cycle G2/M phase transition	biological_process	0.064452	1	2	2861	3	24160	Novel04010,Novel07598
GO:0043138	3-5 DNA helicase activity	molecular_function	0.066273	1	4	2861	12	24160	gene-KI387_036867,gene-KI387_014873,gene-KI387_006086,gene-KI387_030536
GO:0004560	alpha-L-fucosidase activity	molecular_function	0.066333	1	2	2861	3	24160	gene-KI387_026262,gene-KI387_026263
GO:0015928	fucosidase activity	molecular_function	0.066333	1	2	2861	3	24160	gene-KI387_026263,gene-KI387_026262
GO:0006996	organelle organization	biological_process	0.066366	1	121	2861	861	24160	gene-KI387_021000,gene-KI387_011900,gene-KI387_021462,gene-KI387_026648,gene-KI387_039089,gene-KI387_035255,gene-KI387_022830,gene-KI387_035807,Novel00556,gene-KI387_030371,gene-KI387_018789,gene-KI387_035952,gene-KI387_014886,gene-KI387_004945,Novel06439,gene-KI387_021085,gene-KI387_043920,gene-KI387_009072,Novel01840,gene-KI387_031775,gene-KI387_035886,gene-KI387_015500,gene-KI387_023200,gene-K…
GO:0007586	digestion	biological_process	0.066534	1	5	2861	18	24160	gene-KI387_022937,gene-KI387_023418,gene-KI387_027826,gene-KI387_023931,gene-KI387_022759
GO:0032991	protein-containing complex	cellular_component	0.067123	1	283	2861	2143	24160	gene-KI387_021000,gene-KI387_035631,gene-KI387_034690,gene-KI387_037130,gene-KI387_018789,Novel02679,Novel01373,gene-KI387_038076,gene-KI387_025662,gene-KI387_028432,gene-KI387_003034,gene-KI387_012076,gene-KI387_015215,Novel06718,gene-KI387_026122,Novel01457,gene-KI387_021515,Novel07508,gene-KI387_000026,gene-KI387_037293,gene-KI387_022676,gene-KI387_014603,gene-KI387_031884,gene-KI387_026395,No…
GO:0075733	intracellular transport of virus	biological_process	0.067762	1	6	2861	22	24160	Novel03018,gene-KI387_034994,Novel03314,gene-KI387_010283,gene-KI387_013795,Novel03019
GO:0031225	anchored component of membrane	cellular_component	0.06786	1	4	2861	13	24160	gene-KI387_031520,gene-KI387_003186,gene-KI387_021515,gene-KI387_030199
GO:0030291	protein serine/threonine kinase inhibitor activity	molecular_function	0.06802	1	3	2861	7	24160	Novel04864,gene-KI387_011802,gene-KI387_032023
GO:0050920	regulation of chemotaxis	biological_process	0.068514	1	2	2861	3	24160	gene-KI387_009420,gene-KI387_034676
GO:0022836	gated channel activity	molecular_function	0.069517	1	25	2861	136	24160	gene-KI387_041763,gene-KI387_036725,gene-KI387_033736,gene-KI387_023507,gene-KI387_005247,gene-KI387_015378,Novel01747,gene-KI387_032296,Novel07584,gene-KI387_031011,gene-KI387_015386,gene-KI387_008890,gene-KI387_019181,gene-KI387_017431,gene-KI387_005767,Novel00827,Novel01258,gene-KI387_034145,gene-KI387_014593,gene-KI387_015382,gene-KI387_018969,gene-KI387_033175,gene-KI387_021443,gene-KI387_01…
GO:0000271	polysaccharide biosynthetic process	biological_process	0.069781	1	20	2861	110	24160	gene-KI387_008976,gene-KI387_035372,gene-KI387_024124,Novel01329,gene-KI387_034363,Novel06222,gene-KI387_037661,gene-KI387_034376,Novel03831,gene-KI387_008966,gene-KI387_022268,Novel04282,gene-KI387_034362,Novel06221,gene-KI387_034364,gene-KI387_034375,gene-KI387_034367,gene-KI387_010785,gene-KI387_031805,gene-KI387_040266
GO:0003012	muscle system process	biological_process	0.069799	1	2	2861	3	24160	gene-KI387_016269,Novel04537
GO:0006936	muscle contraction	biological_process	0.069799	1	2	2861	3	24160	gene-KI387_016269,Novel04537
GO:0006937	regulation of muscle contraction	biological_process	0.069799	1	2	2861	3	24160	Novel04537,gene-KI387_016269
GO:0006939	smooth muscle contraction	biological_process	0.069799	1	2	2861	3	24160	Novel04537,gene-KI387_016269
GO:0006940	regulation of smooth muscle contraction	biological_process	0.069799	1	2	2861	3	24160	gene-KI387_016269,Novel04537
GO:0090257	regulation of muscle system process	biological_process	0.069799	1	2	2861	3	24160	Novel04537,gene-KI387_016269
GO:0019634	organic phosphonate metabolic process	biological_process	0.069829	1	2	2861	5	24160	Novel00713,Novel03646
GO:0006811	ion transport	biological_process	0.070176	1	142	2861	1033	24160	gene-KI387_014652,gene-KI387_016262,gene-KI387_015726,gene-KI387_024034,gene-KI387_019343,gene-KI387_034884,Novel02199,gene-KI387_013185,gene-KI387_039570,gene-KI387_023574,Novel06197,gene-KI387_037067,Novel06012,gene-KI387_025940,gene-KI387_015725,gene-KI387_005969,gene-KI387_017418,gene-KI387_027183,gene-KI387_019034,gene-KI387_005247,Novel02292,gene-KI387_023507,gene-KI387_009072,Novel01849,ge…
GO:0007029	endoplasmic reticulum organization	biological_process	0.070685	1	6	2861	24	24160	Novel05615,gene-KI387_026395,gene-KI387_019052,gene-KI387_035603,Novel01404,gene-KI387_009072
GO:0004827	proline-tRNA ligase activity	molecular_function	0.070969	1	3	2861	7	24160	Novel02670,gene-KI387_008045,gene-KI387_023779
GO:0006433	prolyl-tRNA aminoacylation	biological_process	0.070969	1	3	2861	7	24160	gene-KI387_023779,gene-KI387_008045,Novel02670
GO:0019054	modulation by virus of host cellular process	biological_process	0.071123	1	5	2861	18	24160	Novel00004,gene-KI387_027955,Novel01143,gene-KI387_002547,gene-KI387_032540
GO:0044068	modulation by symbiont of host cellular process	biological_process	0.071123	1	5	2861	18	24160	gene-KI387_032540,gene-KI387_002547,Novel01143,Novel00004,gene-KI387_027955
GO:0000439	transcription factor TFIIH core complex	cellular_component	0.071125	1	4	2861	13	24160	gene-KI387_001302,gene-KI387_026122,Novel02730,gene-KI387_006717
GO:0000160	phosphorelay signal transduction system	biological_process	0.071547	1	17	2861	86	24160	gene-KI387_017807,gene-KI387_035734,gene-KI387_007332,gene-KI387_030580,gene-KI387_031811,gene-KI387_006178,gene-KI387_024078,gene-KI387_020237,gene-KI387_003859,gene-KI387_028574,gene-KI387_038879,gene-KI387_025096,gene-KI387_015215,gene-KI387_009389,gene-KI387_010786,gene-KI387_020090,gene-KI387_013411
GO:0051716	cellular response to stimulus	biological_process	0.072104	1	207	2861	1444	24160	gene-KI387_012280,gene-KI387_021300,gene-KI387_033187,gene-KI387_019710,gene-KI387_033312,gene-KI387_033305,gene-KI387_033296,gene-KI387_020056,gene-KI387_019448,gene-KI387_025123,gene-KI387_022303,gene-KI387_006717,gene-KI387_012666,gene-KI387_035275,gene-KI387_022309,gene-KI387_006178,gene-KI387_008045,gene-KI387_022318,gene-KI387_033088,gene-KI387_032603,gene-KI387_021115,gene-KI387_020471,gen…
GO:0002682	regulation of immune system process	biological_process	0.073273	1	10	2861	47	24160	gene-KI387_012362,gene-KI387_032037,gene-KI387_035995,gene-KI387_018245,gene-KI387_024888,Novel07019,gene-KI387_010611,gene-KI387_032563,Novel07020,Novel00919
GO:0006323	DNA packaging	biological_process	0.073311	1	11	2861	58	24160	Novel07366,gene-KI387_043920,gene-KI387_033085,gene-KI387_000870,gene-KI387_022830,gene-KI387_037906,gene-KI387_003569,gene-KI387_015500,gene-KI387_029868,gene-KI387_032240,gene-KI387_031888
GO:1990316	Atg1/ULK1 kinase complex	cellular_component	0.07336	1	2	2861	4	24160	gene-KI387_014166,gene-KI387_005177
GO:0016851	magnesium chelatase activity	molecular_function	0.073361	1	2	2861	5	24160	gene-KI387_039683,gene-KI387_022110
GO:0051002	ligase activity, forming nitrogen-metal bonds	molecular_function	0.073361	1	2	2861	5	24160	gene-KI387_022110,gene-KI387_039683
GO:0051003	ligase activity, forming nitrogen-metal bonds, forming coordination complexes	molecular_function	0.073361	1	2	2861	5	24160	gene-KI387_039683,gene-KI387_022110
GO:0008194	UDP-glycosyltransferase activity	molecular_function	0.073474	1	26	2861	147	24160	Novel01393,Novel02647,gene-KI387_024368,gene-KI387_034376,gene-KI387_037661,Novel06222,gene-KI387_012562,gene-KI387_012559,Novel06027,gene-KI387_034363,gene-KI387_008976,gene-KI387_019517,gene-KI387_035372,gene-KI387_032496,gene-KI387_040266,gene-KI387_031805,gene-KI387_010785,gene-KI387_034364,gene-KI387_034367,Novel00663,gene-KI387_034375,gene-KI387_034362,Novel06221,gene-KI387_008966,Novel0428…
GO:0008882	[glutamate-ammonia-ligase] adenylyltransferase activity	molecular_function	0.074961	1	1	2861	1	24160	gene-KI387_001044
GO:0046658	anchored component of plasma membrane	cellular_component	0.075648	1	2	2861	4	24160	gene-KI387_021515,gene-KI387_003186
GO:0030133	transport vesicle	cellular_component	0.07722	1	12	2861	63	24160	gene-KI387_000035,gene-KI387_003034,gene-KI387_006267,Novel05114,gene-KI387_029452,Novel06749,gene-KI387_020721,gene-KI387_013376,gene-KI387_000561,Novel03486,gene-KI387_020360,Novel06492
GO:0003682	chromatin binding	molecular_function	0.077601	1	12	2861	65	24160	gene-KI387_005671,gene-KI387_023728,gene-KI387_001525,gene-KI387_004449,gene-KI387_015993,gene-KI387_005551,gene-KI387_018189,Novel04836,Novel02576,gene-KI387_001874,Novel01067,Novel06055
GO:0030313	cell envelope	cellular_component	0.077691	1	4	2861	13	24160	Novel04215,gene-KI387_033671,gene-KI387_035205,gene-KI387_009892
GO:0006020	inositol metabolic process	biological_process	0.078846	1	4	2861	18	24160	gene-KI387_028163,gene-KI387_007364,gene-KI387_016358,Novel03847
GO:0000796	condensin complex	cellular_component	0.079212	1	2	2861	3	24160	gene-KI387_029868,gene-KI387_015500
GO:0007076	mitotic chromosome condensation	biological_process	0.079212	1	2	2861	3	24160	gene-KI387_029868,gene-KI387_015500
GO:0051028	mRNA transport	biological_process	0.080128	1	7	2861	31	24160	gene-KI387_035603,gene-KI387_037293,gene-KI387_023851,gene-KI387_019052,gene-KI387_026395,Novel02016,Novel03889
GO:0045892	negative regulation of transcription, DNA-templated	biological_process	0.080318	1	7	2861	30	24160	Novel00180,Novel04215,Novel02501,gene-KI387_008144,Novel00083,gene-KI387_022908,Novel00556
GO:1902679	negative regulation of RNA biosynthetic process	biological_process	0.080318	1	7	2861	30	24160	Novel00083,gene-KI387_022908,Novel00556,Novel00180,Novel04215,gene-KI387_008144,Novel02501
GO:1903507	negative regulation of nucleic acid-templated transcription	biological_process	0.080318	1	7	2861	30	24160	gene-KI387_008144,Novel02501,Novel00180,Novel04215,Novel00556,gene-KI387_022908,Novel00083
GO:0004623	phospholipase A2 activity	molecular_function	0.080495	1	2	2861	5	24160	gene-KI387_021407,Novel03194
GO:0015908	fatty acid transport	biological_process	0.080495	1	2	2861	5	24160	Novel03194,gene-KI387_021407
GO:0015909	long-chain fatty acid transport	biological_process	0.080495	1	2	2861	5	24160	Novel03194,gene-KI387_021407
GO:0032309	icosanoid secretion	biological_process	0.080495	1	2	2861	5	24160	gene-KI387_021407,Novel03194
GO:0050482	arachidonic acid secretion	biological_process	0.080495	1	2	2861	5	24160	Novel03194,gene-KI387_021407
GO:0071715	icosanoid transport	biological_process	0.080495	1	2	2861	5	24160	Novel03194,gene-KI387_021407
GO:1901571	fatty acid derivative transport	biological_process	0.080495	1	2	2861	5	24160	Novel03194,gene-KI387_021407
GO:1903963	arachidonate transport	biological_process	0.080495	1	2	2861	5	24160	gene-KI387_021407,Novel03194
GO:0016843	amine-lyase activity	molecular_function	0.081102	1	3	2861	8	24160	gene-KI387_039938,gene-KI387_010003,gene-KI387_017753
GO:0016844	strictosidine synthase activity	molecular_function	0.081102	1	3	2861	8	24160	gene-KI387_010003,gene-KI387_039938,gene-KI387_017753
GO:0022411	cellular component disassembly	biological_process	0.081291	1	8	2861	40	24160	gene-KI387_018108,gene-KI387_026648,Novel02165,gene-KI387_024587,gene-KI387_001044,gene-KI387_015278,gene-KI387_008262,gene-KI387_000492
GO:0032984	protein-containing complex disassembly	biological_process	0.081291	1	8	2861	40	24160	gene-KI387_018108,gene-KI387_026648,gene-KI387_015278,gene-KI387_000492,gene-KI387_008262,Novel02165,gene-KI387_024587,gene-KI387_001044
GO:0002098	tRNA wobble uridine modification	biological_process	0.082027	1	7	2861	31	24160	gene-KI387_013169,Novel05050,gene-KI387_010074,gene-KI387_030368,Novel05393,gene-KI387_027887,gene-KI387_023060
GO:0051258	protein polymerization	biological_process	0.082097	1	11	2861	63	24160	gene-KI387_025953,gene-KI387_013415,gene-KI387_005255,gene-KI387_015278,gene-KI387_026648,gene-KI387_006020,gene-KI387_018108,gene-KI387_015120,gene-KI387_003620,gene-KI387_011870,gene-KI387_025940
GO:0030042	actin filament depolymerization	biological_process	0.08263	1	3	2861	10	24160	gene-KI387_018108,gene-KI387_026648,gene-KI387_015278
GO:0030834	regulation of actin filament depolymerization	biological_process	0.08263	1	3	2861	10	24160	gene-KI387_026648,gene-KI387_018108,gene-KI387_015278
GO:0030835	negative regulation of actin filament depolymerization	biological_process	0.08263	1	3	2861	10	24160	gene-KI387_018108,gene-KI387_026648,gene-KI387_015278
GO:0030837	negative regulation of actin filament polymerization	biological_process	0.08263	1	3	2861	10	24160	gene-KI387_026648,gene-KI387_018108,gene-KI387_015278
GO:0031333	negative regulation of protein-containing complex assembly	biological_process	0.08263	1	3	2861	10	24160	gene-KI387_026648,gene-KI387_018108,gene-KI387_015278
GO:0032272	negative regulation of protein polymerization	biological_process	0.08263	1	3	2861	10	24160	gene-KI387_018108,gene-KI387_026648,gene-KI387_015278
GO:0051016	barbed-end actin filament capping	biological_process	0.08263	1	3	2861	10	24160	gene-KI387_015278,gene-KI387_026648,gene-KI387_018108
GO:0051261	protein depolymerization	biological_process	0.08263	1	3	2861	10	24160	gene-KI387_015278,gene-KI387_018108,gene-KI387_026648
GO:0051494	negative regulation of cytoskeleton organization	biological_process	0.08263	1	3	2861	10	24160	gene-KI387_026648,gene-KI387_018108,gene-KI387_015278
GO:0051693	actin filament capping	biological_process	0.08263	1	3	2861	10	24160	gene-KI387_015278,gene-KI387_026648,gene-KI387_018108
GO:1901879	regulation of protein depolymerization	biological_process	0.08263	1	3	2861	10	24160	gene-KI387_015278,gene-KI387_018108,gene-KI387_026648
GO:1901880	negative regulation of protein depolymerization	biological_process	0.08263	1	3	2861	10	24160	gene-KI387_018108,gene-KI387_026648,gene-KI387_015278
GO:1902904	negative regulation of supramolecular fiber organization	biological_process	0.08263	1	3	2861	10	24160	gene-KI387_018108,gene-KI387_026648,gene-KI387_015278
GO:0035556	intracellular signal transduction	biological_process	0.083288	1	35	2861	207	24160	gene-KI387_013411,gene-KI387_020090,gene-KI387_024913,gene-KI387_032037,gene-KI387_038879,gene-KI387_025096,gene-KI387_009389,gene-KI387_009411,gene-KI387_020237,gene-KI387_024078,gene-KI387_043278,gene-KI387_030894,gene-KI387_003859,Novel06535,Novel00919,gene-KI387_030580,gene-KI387_007332,gene-KI387_017807,gene-KI387_004449,gene-KI387_012280,gene-KI387_010786,gene-KI387_002356,Novel02670,gene-K…
GO:0014065	phosphatidylinositol 3-kinase signaling	biological_process	0.085521	1	3	2861	9	24160	gene-KI387_032037,Novel00919,gene-KI387_024888
GO:0014066	regulation of phosphatidylinositol 3-kinase signaling	biological_process	0.085521	1	3	2861	9	24160	gene-KI387_032037,Novel00919,gene-KI387_024888
GO:0014068	positive regulation of phosphatidylinositol 3-kinase signaling	biological_process	0.085521	1	3	2861	9	24160	gene-KI387_032037,Novel00919,gene-KI387_024888
GO:0043548	phosphatidylinositol 3-kinase binding	molecular_function	0.085521	1	3	2861	9	24160	Novel00919,gene-KI387_024888,gene-KI387_032037
GO:0048015	phosphatidylinositol-mediated signaling	biological_process	0.085521	1	3	2861	9	24160	gene-KI387_032037,Novel00919,gene-KI387_024888
GO:0048017	inositol lipid-mediated signaling	biological_process	0.085521	1	3	2861	9	24160	gene-KI387_024888,Novel00919,gene-KI387_032037
GO:0006476	protein deacetylation	biological_process	0.086941	1	5	2861	15	24160	gene-KI387_023200,gene-KI387_009072,gene-KI387_031884,gene-KI387_012099,gene-KI387_030667
GO:0016575	histone deacetylation	biological_process	0.086941	1	5	2861	15	24160	gene-KI387_030667,gene-KI387_031884,gene-KI387_012099,gene-KI387_023200,gene-KI387_009072
GO:0035601	protein deacylation	biological_process	0.086941	1	5	2861	15	24160	gene-KI387_012099,gene-KI387_031884,gene-KI387_030667,gene-KI387_023200,gene-KI387_009072
GO:0098732	macromolecule deacylation	biological_process	0.086941	1	5	2861	15	24160	gene-KI387_030667,gene-KI387_031884,gene-KI387_012099,gene-KI387_023200,gene-KI387_009072
GO:0006268	DNA unwinding involved in DNA replication	biological_process	0.090448	1	2	2861	4	24160	gene-KI387_008720,Novel01840
GO:0016043	cellular component organization	biological_process	0.092197	1	179	2861	1364	24160	Novel03780,gene-KI387_018529,Novel00788,gene-KI387_008605,gene-KI387_026398,gene-KI387_015278,gene-KI387_024161,gene-KI387_006254,gene-KI387_021144,gene-KI387_033187,gene-KI387_022317,gene-KI387_005905,gene-KI387_013415,Novel07366,gene-KI387_018528,Novel02165,gene-KI387_005255,gene-KI387_022303,Novel03887,gene-KI387_024137,gene-KI387_013606,gene-KI387_024587,gene-KI387_020471,gene-KI387_033085,ge…
GO:0005657	replication fork	cellular_component	0.092521	1	3	2861	12	24160	gene-KI387_031655,gene-KI387_013319,gene-KI387_003117
GO:0006066	alcohol metabolic process	biological_process	0.093326	1	8	2861	44	24160	gene-KI387_001322,gene-KI387_016358,gene-KI387_004989,gene-KI387_028163,gene-KI387_002644,Novel03847,gene-KI387_005875,gene-KI387_007364
GO:0006848	pyruvate transport	biological_process	0.094035	1	2	2861	7	24160	Novel04001,gene-KI387_015775
GO:0006850	mitochondrial pyruvate transmembrane transport	biological_process	0.094035	1	2	2861	7	24160	gene-KI387_015775,Novel04001
GO:1901475	pyruvate transmembrane transport	biological_process	0.094035	1	2	2861	7	24160	gene-KI387_015775,Novel04001
GO:0009279	cell outer membrane	cellular_component	0.094195	1	3	2861	8	24160	gene-KI387_009892,gene-KI387_035205,Novel04215
GO:0005976	polysaccharide metabolic process	biological_process	0.094271	1	31	2861	193	24160	gene-KI387_040266,gene-KI387_020660,gene-KI387_031805,Novel01974,Novel06221,gene-KI387_034362,gene-KI387_042546,Novel04282,gene-KI387_022268,gene-KI387_008966,gene-KI387_011411,gene-KI387_010785,gene-KI387_034375,gene-KI387_034367,gene-KI387_034364,Novel06222,gene-KI387_037661,gene-KI387_018929,gene-KI387_034363,Novel01329,gene-KI387_024124,Novel03831,gene-KI387_034376,gene-KI387_001229,gene-KI38…
GO:0004748	ribonucleoside-diphosphate reductase activity, thioredoxin disulfide as acceptor	molecular_function	0.09443	1	2	2861	4	24160	gene-KI387_035356,gene-KI387_026009
GO:0061731	ribonucleoside-diphosphate reductase activity	molecular_function	0.09443	1	2	2861	4	24160	gene-KI387_026009,gene-KI387_035356
GO:0016818	hydrolase activity, acting on acid anhydrides, in phosphorus-containing anhydrides	molecular_function	0.095224	1	194	2861	1325	24160	gene-KI387_012064,Novel05545,Novel05050,Novel00601,gene-KI387_002376,gene-KI387_032732,Novel06117,gene-KI387_017652,Novel06535,gene-KI387_002012,gene-KI387_019050,gene-KI387_036867,Novel05116,Novel04744,gene-KI387_003803,Novel03044,gene-KI387_027917,gene-KI387_039451,gene-KI387_039204,Novel07258,gene-KI387_024720,gene-KI387_032737,gene-KI387_031445,gene-KI387_033747,gene-KI387_015115,gene-KI387_0…
GO:0071103	DNA conformation change	biological_process	0.095376	1	18	2861	109	24160	Novel01840,gene-KI387_029868,gene-KI387_013528,gene-KI387_015500,gene-KI387_000870,gene-KI387_033085,gene-KI387_010241,gene-KI387_008720,gene-KI387_031888,gene-KI387_032240,gene-KI387_013606,gene-KI387_003569,gene-KI387_037906,gene-KI387_022830,Novel00556,gene-KI387_013526,gene-KI387_043920,Novel07366
GO:1902554	serine/threonine protein kinase complex	cellular_component	0.095675	1	2	2861	5	24160	gene-KI387_014166,gene-KI387_005177
GO:0009288	bacterial-type flagellum	cellular_component	0.096077	1	8	2861	39	24160	Novel06367,gene-KI387_032237,gene-KI387_026497,gene-KI387_025961,gene-KI387_033776,gene-KI387_034676,gene-KI387_037720,gene-KI387_009420
GO:0007169	transmembrane receptor protein tyrosine kinase signaling pathway	biological_process	0.09628	1	2	2861	4	24160	gene-KI387_030894,gene-KI387_010355
GO:0006974	cellular response to DNA damage stimulus	biological_process	0.096502	1	78	2861	501	24160	gene-KI387_013319,gene-KI387_034862,gene-KI387_015914,gene-KI387_014873,gene-KI387_033187,gene-KI387_019710,Novel02309,gene-KI387_019448,gene-KI387_035737,Novel02291,gene-KI387_014494,gene-KI387_006717,gene-KI387_032739,gene-KI387_022309,gene-KI387_023924,gene-KI387_013934,gene-KI387_024377,gene-KI387_000412,gene-KI387_032603,Novel06749,gene-KI387_037640,gene-KI387_003803,Novel03044,gene-KI387_03…
GO:0072344	rescue of stalled ribosome	biological_process	0.096916	1	3	2861	10	24160	Novel01393,gene-KI387_015500,Novel04166
GO:0051253	negative regulation of RNA metabolic process	biological_process	0.097346	1	7	2861	31	24160	Novel00556,gene-KI387_022908,Novel00083,gene-KI387_008144,Novel02501,Novel04215,Novel00180
GO:0015276	ligand-gated ion channel activity	molecular_function	0.09921	1	17	2861	89	24160	gene-KI387_034145,gene-KI387_005767,gene-KI387_019181,gene-KI387_017431,gene-KI387_000413,gene-KI387_018969,gene-KI387_033175,gene-KI387_021443,gene-KI387_015382,gene-KI387_005247,gene-KI387_033736,gene-KI387_041763,gene-KI387_015386,Novel07584,gene-KI387_031011,gene-KI387_015378,Novel01747
GO:0022834	ligand-gated channel activity	molecular_function	0.09921	1	17	2861	89	24160	gene-KI387_033736,gene-KI387_041763,gene-KI387_005247,gene-KI387_015378,Novel01747,gene-KI387_015386,Novel07584,gene-KI387_031011,gene-KI387_005767,gene-KI387_019181,gene-KI387_017431,gene-KI387_034145,gene-KI387_018969,gene-KI387_021443,gene-KI387_033175,gene-KI387_015382,gene-KI387_000413
GO:0016247	channel regulator activity	molecular_function	0.099356	1	16	2861	91	24160	Novel05014,Novel07095,gene-KI387_012537,Novel00713,gene-KI387_038076,gene-KI387_033567,gene-KI387_039451,Novel07230,gene-KI387_010241,gene-KI387_039683,gene-KI387_012289,gene-KI387_014325,Novel02508,Novel03194,gene-KI387_022324,gene-KI387_027826
GO:0099106	ion channel regulator activity	molecular_function	0.099356	1	16	2861	91	24160	gene-KI387_022324,gene-KI387_027826,gene-KI387_014325,Novel02508,Novel03194,gene-KI387_039683,gene-KI387_012289,gene-KI387_010241,gene-KI387_039451,Novel07230,gene-KI387_033567,Novel05014,Novel07095,gene-KI387_012537,Novel00713,gene-KI387_038076
GO:0019321	pentose metabolic process	biological_process	0.10045	1	2	2861	4	24160	Novel05016,gene-KI387_024587
GO:0019566	arabinose metabolic process	biological_process	0.10045	1	2	2861	4	24160	gene-KI387_024587,Novel05016
GO:0046373	L-arabinose metabolic process	biological_process	0.10045	1	2	2861	4	24160	gene-KI387_024587,Novel05016
GO:0005798	Golgi-associated vesicle	cellular_component	0.10081	1	13	2861	69	24160	gene-KI387_020360,Novel06492,Novel03486,gene-KI387_010663,gene-KI387_013376,gene-KI387_000561,gene-KI387_020721,Novel06749,gene-KI387_029452,gene-KI387_003034,gene-KI387_000035,Novel05114,gene-KI387_006267
GO:0030120	vesicle coat	cellular_component	0.10081	1	13	2861	69	24160	gene-KI387_020360,Novel06492,gene-KI387_013376,gene-KI387_010663,gene-KI387_000561,Novel03486,gene-KI387_029452,Novel06749,gene-KI387_020721,gene-KI387_000035,gene-KI387_003034,gene-KI387_006267,Novel05114
GO:0030135	coated vesicle	cellular_component	0.10081	1	13	2861	69	24160	Novel05114,gene-KI387_006267,gene-KI387_003034,gene-KI387_000035,Novel06749,gene-KI387_020721,gene-KI387_029452,Novel03486,gene-KI387_010663,gene-KI387_013376,gene-KI387_000561,Novel06492,gene-KI387_020360
GO:0030660	Golgi-associated vesicle membrane	cellular_component	0.10081	1	13	2861	69	24160	gene-KI387_029452,Novel06749,gene-KI387_020721,gene-KI387_003034,gene-KI387_000035,Novel05114,gene-KI387_006267,gene-KI387_020360,Novel06492,gene-KI387_010663,gene-KI387_000561,gene-KI387_013376,Novel03486
GO:0030662	coated vesicle membrane	cellular_component	0.10081	1	13	2861	69	24160	gene-KI387_000561,gene-KI387_010663,gene-KI387_013376,Novel03486,gene-KI387_020360,Novel06492,gene-KI387_000035,gene-KI387_003034,gene-KI387_006267,Novel05114,gene-KI387_029452,Novel06749,gene-KI387_020721
GO:0000725	recombinational repair	biological_process	0.10093	1	3	2861	8	24160	Novel06718,gene-KI387_030668,gene-KI387_003567
GO:0006270	DNA replication initiation	biological_process	0.10157	1	17	2861	102	24160	gene-KI387_028659,gene-KI387_027179,Novel02371,gene-KI387_002376,gene-KI387_022036,Novel07508,gene-KI387_021515,gene-KI387_013606,gene-KI387_002324,gene-KI387_020747,gene-KI387_020524,gene-KI387_012566,Novel06055,gene-KI387_005247,gene-KI387_015188,Novel06748,gene-KI387_003117
GO:0006568	tryptophan metabolic process	biological_process	0.10188	1	2	2861	6	24160	gene-KI387_035478,gene-KI387_019194
GO:0006586	indolalkylamine metabolic process	biological_process	0.10188	1	2	2861	6	24160	gene-KI387_035478,gene-KI387_019194
GO:0042430	indole-containing compound metabolic process	biological_process	0.10188	1	2	2861	6	24160	gene-KI387_035478,gene-KI387_019194
GO:0006334	nucleosome assembly	biological_process	0.10262	1	5	2861	26	24160	gene-KI387_043920,gene-KI387_037906,gene-KI387_022830,gene-KI387_031888,gene-KI387_032240
GO:0031497	chromatin assembly	biological_process	0.10262	1	5	2861	26	24160	gene-KI387_032240,gene-KI387_031888,gene-KI387_043920,gene-KI387_037906,gene-KI387_022830
GO:0008150	biological_process	biological_process	0.10341	1	1995	2861	16290	24160	Novel06329,gene-KI387_023113,gene-KI387_022888,gene-KI387_020340,gene-KI387_016558,Novel06055,gene-KI387_041952,Novel03173,Novel00837,gene-KI387_011451,Novel02294,gene-KI387_032618,Novel01707,gene-KI387_020655,gene-KI387_006299,gene-KI387_000685,Novel06759,gene-KI387_022303,gene-KI387_008978,gene-KI387_023319,gene-KI387_031922,gene-KI387_018316,gene-KI387_020535,gene-KI387_011778,gene-KI387_03053…
I387_004903,gene-KI387_017939,gene-KI387_001387,gene-KI387_020918,Novel03644
GO:0000079	regulation of cyclin-dependent protein serine/threonine kinase activity	biological_process	0.10343	1	4	2861	16	24160	gene-KI387_003844,Novel00381,gene-KI387_017703,gene-KI387_035175
GO:1904029	regulation of cyclin-dependent protein kinase activity	biological_process	0.10343	1	4	2861	16	24160	Novel00381,gene-KI387_003844,gene-KI387_035175,gene-KI387_017703
GO:0031012	extracellular matrix	cellular_component	0.10371	1	4	2861	16	24160	gene-KI387_014523,gene-KI387_014524,gene-KI387_021515,gene-KI387_005045
GO:0016010	dystrophin-associated glycoprotein complex	cellular_component	0.1053	1	4	2861	15	24160	gene-KI387_011453,gene-KI387_007551,gene-KI387_035155,Novel06791
GO:0090665	glycoprotein complex	cellular_component	0.1053	1	4	2861	15	24160	gene-KI387_007551,gene-KI387_011453,Novel06791,gene-KI387_035155
GO:0019900	kinase binding	molecular_function	0.10579	1	8	2861	47	24160	gene-KI387_013475,Novel02995,Novel00381,gene-KI387_017703,gene-KI387_039905,gene-KI387_003844,gene-KI387_024161,gene-KI387_035175
GO:0030547	receptor inhibitor activity	molecular_function	0.10593	1	4	2861	15	24160	gene-KI387_021013,gene-KI387_008818,gene-KI387_037895,gene-KI387_039275
GO:0030548	acetylcholine receptor regulator activity	molecular_function	0.10593	1	4	2861	15	24160	gene-KI387_039275,gene-KI387_021013,gene-KI387_037895,gene-KI387_008818
GO:0030550	acetylcholine receptor inhibitor activity	molecular_function	0.10593	1	4	2861	15	24160	gene-KI387_037895,gene-KI387_021013,gene-KI387_008818,gene-KI387_039275
GO:0099602	neurotransmitter receptor regulator activity	molecular_function	0.10593	1	4	2861	15	24160	gene-KI387_021013,gene-KI387_008818,gene-KI387_037895,gene-KI387_039275
GO:0012506	vesicle membrane	cellular_component	0.10675	1	13	2861	70	24160	gene-KI387_006267,Novel05114,gene-KI387_000035,gene-KI387_003034,Novel06749,gene-KI387_020721,gene-KI387_029452,Novel03486,gene-KI387_010663,gene-KI387_013376,gene-KI387_000561,Novel06492,gene-KI387_020360
GO:0030659	cytoplasmic vesicle membrane	cellular_component	0.10675	1	13	2861	70	24160	gene-KI387_003034,gene-KI387_000035,Novel05114,gene-KI387_006267,gene-KI387_029452,Novel06749,gene-KI387_020721,gene-KI387_010663,gene-KI387_013376,gene-KI387_000561,Novel03486,gene-KI387_020360,Novel06492
GO:0033692	cellular polysaccharide biosynthetic process	biological_process	0.10688	1	18	2861	101	24160	Novel06222,gene-KI387_037661,Novel01329,gene-KI387_034363,gene-KI387_034376,gene-KI387_035372,gene-KI387_008976,gene-KI387_040266,gene-KI387_031805,Novel06221,gene-KI387_034362,gene-KI387_022268,Novel04282,gene-KI387_008966,gene-KI387_010785,gene-KI387_034367,gene-KI387_034375,gene-KI387_034364
GO:0019075	virus maturation	biological_process	0.1074	1	1	2861	1	24160	gene-KI387_036186
GO:0046797	viral procapsid maturation	biological_process	0.1074	1	1	2861	1	24160	gene-KI387_036186
GO:0009581	detection of external stimulus	biological_process	0.10898	1	2	2861	4	24160	gene-KI387_021666,gene-KI387_029371
GO:0009582	detection of abiotic stimulus	biological_process	0.10898	1	2	2861	4	24160	gene-KI387_029371,gene-KI387_021666
GO:0009583	detection of light stimulus	biological_process	0.10898	1	2	2861	4	24160	gene-KI387_029371,gene-KI387_021666
GO:0009584	detection of visible light	biological_process	0.10898	1	2	2861	4	24160	gene-KI387_029371,gene-KI387_021666
GO:0034702	ion channel complex	cellular_component	0.10953	1	5	2861	20	24160	Novel02515,gene-KI387_029517,gene-KI387_019115,Novel06197,gene-KI387_023507
GO:0016817	hydrolase activity, acting on acid anhydrides	molecular_function	0.10966	1	198	2861	1373	24160	gene-KI387_021103,Novel04200,gene-KI387_012915,gene-KI387_027910,gene-KI387_021115,gene-KI387_020471,gene-KI387_020535,gene-KI387_037720,gene-KI387_033085,gene-KI387_030536,gene-KI387_015750,gene-KI387_010283,gene-KI387_015674,gene-KI387_023866,gene-KI387_027932,gene-KI387_035702,gene-KI387_023573,gene-KI387_021858,gene-KI387_032870,gene-KI387_033939,gene-KI387_036395,gene-KI387_002297,gene-KI387…
GO:0000902	cell morphogenesis	biological_process	0.10977	1	5	2861	22	24160	Novel03431,gene-KI387_003620,Novel00389,gene-KI387_026490,gene-KI387_013946
GO:0120036	plasma membrane bounded cell projection organization	biological_process	0.10984	1	6	2861	27	24160	gene-KI387_025607,Novel03431,gene-KI387_026490,gene-KI387_013946,gene-KI387_019866,Novel02313
GO:1901617	organic hydroxy compound biosynthetic process	biological_process	0.11038	1	6	2861	32	24160	gene-KI387_001322,gene-KI387_016358,Novel05221,Novel03847,gene-KI387_007364,gene-KI387_028163
GO:0050789	regulation of biological process	biological_process	0.11138	1	430	2861	3219	24160	gene-KI387_003859,Novel03194,gene-KI387_038702,gene-KI387_034676,Novel04351,Novel04146,gene-KI387_034161,gene-KI387_019050,gene-KI387_004449,gene-KI387_022929,gene-KI387_034125,gene-KI387_030580,gene-KI387_022915,gene-KI387_022919,gene-KI387_035995,gene-KI387_002376,gene-KI387_032987,Novel05197,Novel06573,gene-KI387_023468,gene-KI387_017248,gene-KI387_033155,Novel00067,Novel00743,Novel01404,Novel…
GO:0097193	intrinsic apoptotic signaling pathway	biological_process	0.11173	1	2	2861	4	24160	gene-KI387_032285,gene-KI387_016205
GO:0048523	negative regulation of cellular process	biological_process	0.11175	1	29	2861	193	24160	gene-KI387_008144,Novel02501,Novel03833,gene-KI387_018108,gene-KI387_032540,gene-KI387_015386,gene-KI387_015278,Novel00083,gene-KI387_010359,gene-KI387_037640,gene-KI387_022908,gene-KI387_015378,gene-KI387_002547,Novel00180,Novel04215,gene-KI387_030894,Novel04864,gene-KI387_013606,gene-KI387_026648,gene-KI387_022303,gene-KI387_016654,Novel04146,Novel00556,Novel06919,gene-KI387_022918,gene-KI387_0…
GO:0005996	monosaccharide metabolic process	biological_process	0.11181	1	15	2861	84	24160	gene-KI387_027932,gene-KI387_032581,gene-KI387_027917,gene-KI387_002376,gene-KI387_007279,gene-KI387_016264,gene-KI387_032579,Novel06979,gene-KI387_032582,gene-KI387_024587,Novel04482,Novel05016,gene-KI387_038659,Novel02291,gene-KI387_022335
GO:0045934	negative regulation of nucleobase-containing compound metabolic process	biological_process	0.11194	1	7	2861	32	24160	Novel00083,gene-KI387_022908,Novel00556,Novel04215,Novel00180,Novel02501,gene-KI387_008144
GO:0005785	signal recognition particle receptor complex	cellular_component	0.11204	1	2	2861	5	24160	gene-KI387_031655,gene-KI387_023573
GO:0017111	nucleoside-triphosphatase activity	molecular_function	0.11229	1	172	2861	1149	24160	Novel00601,Novel05050,gene-KI387_012064,Novel06117,gene-KI387_002376,gene-KI387_032732,gene-KI387_017652,Novel06535,gene-KI387_002012,gene-KI387_036867,gene-KI387_019050,gene-KI387_003803,Novel03044,gene-KI387_024720,Novel07258,gene-KI387_039451,gene-KI387_039204,gene-KI387_027917,gene-KI387_031445,gene-KI387_032737,gene-KI387_033747,gene-KI387_000412,gene-KI387_015115,gene-KI387_031524,gene-KI38…
GO:0051493	regulation of cytoskeleton organization	biological_process	0.11258	1	6	2861	29	24160	gene-KI387_018108,gene-KI387_026648,Novel05638,Novel03044,gene-KI387_015278,gene-KI387_025940
GO:0004970	ionotropic glutamate receptor activity	molecular_function	0.11331	1	9	2861	36	24160	gene-KI387_000413,gene-KI387_015386,gene-KI387_031011,gene-KI387_018969,gene-KI387_021443,gene-KI387_015382,gene-KI387_034145,gene-KI387_041763,gene-KI387_019181
GO:0008066	glutamate receptor activity	molecular_function	0.11331	1	9	2861	36	24160	gene-KI387_019181,gene-KI387_041763,gene-KI387_034145,gene-KI387_015382,gene-KI387_021443,gene-KI387_018969,gene-KI387_031011,gene-KI387_015386,gene-KI387_000413
GO:0022824	transmitter-gated ion channel activity	molecular_function	0.11331	1	9	2861	36	24160	gene-KI387_015382,gene-KI387_021443,gene-KI387_018969,gene-KI387_031011,gene-KI387_015386,gene-KI387_000413,gene-KI387_019181,gene-KI387_041763,gene-KI387_034145
GO:0022835	transmitter-gated channel activity	molecular_function	0.11331	1	9	2861	36	24160	gene-KI387_034145,gene-KI387_019181,gene-KI387_041763,gene-KI387_031011,gene-KI387_015386,gene-KI387_000413,gene-KI387_015382,gene-KI387_021443,gene-KI387_018969
GO:0030594	neurotransmitter receptor activity	molecular_function	0.11331	1	9	2861	36	24160	gene-KI387_031011,gene-KI387_000413,gene-KI387_015386,gene-KI387_015382,gene-KI387_018969,gene-KI387_021443,gene-KI387_034145,gene-KI387_019181,gene-KI387_041763
GO:0065007	biological regulation	biological_process	0.11346	1	458	2861	3479	24160	gene-KI387_008188,gene-KI387_003795,gene-KI387_033190,gene-KI387_001173,gene-KI387_013946,gene-KI387_017807,gene-KI387_028107,gene-KI387_042546,gene-KI387_021665,gene-KI387_026070,gene-KI387_001385,gene-KI387_031655,gene-KI387_014403,gene-KI387_011095,gene-KI387_025940,gene-KI387_032906,gene-KI387_001644,gene-KI387_015142,gene-KI387_032288,gene-KI387_006085,gene-KI387_009389,gene-KI387_009411,gen…
GO:0030686	90S preribosome	cellular_component	0.11389	1	3	2861	12	24160	gene-KI387_031942,gene-KI387_005724,Novel07508
GO:0016728	oxidoreductase activity, acting on CH or CH2 groups, disulfide as acceptor	molecular_function	0.11394	1	2	2861	5	24160	gene-KI387_026009,gene-KI387_035356
GO:1902494	catalytic complex	cellular_component	0.11709	1	89	2861	625	24160	gene-KI387_033419,Novel01498,gene-KI387_029503,Novel06145,Novel07453,gene-KI387_008890,gene-KI387_025103,Novel01908,gene-KI387_025266,Novel01143,gene-KI387_035130,gene-KI387_013319,Novel04701,gene-KI387_020340,gene-KI387_038579,Novel04705,gene-KI387_019710,gene-KI387_022918,Novel01179,Novel04282,Novel02028,gene-KI387_032740,Novel05969,gene-KI387_030667,gene-KI387_001578,gene-KI387_006901,gene-KI3…
GO:0032543	mitochondrial translation	biological_process	0.11822	1	2	2861	5	24160	Novel03665,gene-KI387_033296
GO:0140053	mitochondrial gene expression	biological_process	0.11822	1	2	2861	5	24160	Novel03665,gene-KI387_033296
GO:0034622	cellular protein-containing complex assembly	biological_process	0.11824	1	42	2861	308	24160	gene-KI387_005255,gene-KI387_007444,gene-KI387_014405,gene-KI387_037721,gene-KI387_013415,gene-KI387_043920,Novel06516,gene-KI387_018528,gene-KI387_025953,gene-KI387_011900,gene-KI387_020214,gene-KI387_032382,gene-KI387_032240,gene-KI387_031888,gene-KI387_006020,gene-KI387_022830,gene-KI387_026648,gene-KI387_026398,gene-KI387_015278,gene-KI387_024161,Novel00788,gene-KI387_018529,gene-KI387_015196…
GO:0060590	ATPase regulator activity	molecular_function	0.11834	1	7	2861	38	24160	gene-KI387_039683,gene-KI387_039451,Novel03286,gene-KI387_003620,gene-KI387_038049,Novel02613,gene-KI387_006717
GO:0042592	homeostatic process	biological_process	0.11845	1	31	2861	215	24160	gene-KI387_021462,gene-KI387_025376,gene-KI387_043278,gene-KI387_012988,gene-KI387_017652,gene-KI387_024004,gene-KI387_015142,gene-KI387_036700,gene-KI387_000026,gene-KI387_021858,gene-KI387_008188,Novel06197,gene-KI387_006240,Novel04005,gene-KI387_033190,gene-KI387_021085,gene-KI387_033175,Novel04857,gene-KI387_005247,gene-KI387_000412,gene-KI387_016802,gene-KI387_033187,gene-KI387_017879,gene-K…
GO:0048309	endoplasmic reticulum inheritance	biological_process	0.11858	1	3	2861	9	24160	gene-KI387_019052,gene-KI387_026395,gene-KI387_035603
GO:0044839	cell cycle G2/M phase transition	biological_process	0.1188	1	2	2861	4	24160	Novel04010,Novel07598
GO:1902749	regulation of cell cycle G2/M phase transition	biological_process	0.1188	1	2	2861	4	24160	Novel07598,Novel04010
GO:0051020	GTPase binding	molecular_function	0.11959	1	13	2861	67	24160	gene-KI387_030295,Novel03887,Novel00918,gene-KI387_026620,gene-KI387_028604,gene-KI387_008901,gene-KI387_009841,Novel07208,Novel06439,gene-KI387_004726,gene-KI387_023863,gene-KI387_024161,gene-KI387_035952
GO:0009653	anatomical structure morphogenesis	biological_process	0.1209	1	10	2861	59	24160	gene-KI387_026490,gene-KI387_003620,gene-KI387_023225,Novel01894,gene-KI387_031775,Novel03431,Novel00389,gene-KI387_024903,gene-KI387_036255,gene-KI387_013946
GO:0016020	membrane	cellular_component	0.12138	1	552	2861	4231	24160	gene-KI387_008317,gene-KI387_012666,gene-KI387_012977,gene-KI387_008450,gene-KI387_038045,gene-KI387_039683,gene-KI387_025123,gene-KI387_020056,gene-KI387_042319,gene-KI387_021300,gene-KI387_022317,Novel02505,Novel05718,gene-KI387_024161,Novel02023,Novel03585,gene-KI387_015120,gene-KI387_003749,gene-KI387_031805,gene-KI387_033329,Novel02306,gene-KI387_014763,Novel07114,gene-KI387_006734,gene-KI38…
GO:0010374	stomatal complex development	biological_process	0.12238	1	1	2861	1	24160	Novel02989
GO:0048580	regulation of post-embryonic development	biological_process	0.12238	1	1	2861	1	24160	Novel02989
GO:0048582	positive regulation of post-embryonic development	biological_process	0.12238	1	1	2861	1	24160	Novel02989
GO:0090558	plant epidermis development	biological_process	0.12238	1	1	2861	1	24160	Novel02989
GO:2000038	regulation of stomatal complex development	biological_process	0.12238	1	1	2861	1	24160	Novel02989
GO:2000123	positive regulation of stomatal complex development	biological_process	0.12238	1	1	2861	1	24160	Novel02989
GO:0030029	actin filament-based process	biological_process	0.12348	1	8	2861	44	24160	Novel07208,Novel06439,gene-KI387_015278,gene-KI387_035952,Novel03887,gene-KI387_026648,gene-KI387_018108,gene-KI387_025940
GO:0030036	actin cytoskeleton organization	biological_process	0.12348	1	8	2861	44	24160	gene-KI387_025940,gene-KI387_018108,Novel03887,gene-KI387_026648,gene-KI387_015278,gene-KI387_035952,Novel07208,Novel06439
GO:0006310	DNA recombination	biological_process	0.12433	1	42	2861	269	24160	gene-KI387_032740,gene-KI387_031655,Novel03526,Novel04312,gene-KI387_001618,gene-KI387_030668,gene-KI387_031942,Novel07201,gene-KI387_031987,gene-KI387_003803,gene-KI387_003567,Novel03044,gene-KI387_035694,gene-KI387_035566,gene-KI387_020289,gene-KI387_020169,gene-KI387_013934,gene-KI387_016269,gene-KI387_038976,gene-KI387_029371,gene-KI387_032739,gene-KI387_028904,gene-KI387_035737,gene-KI387_02…
GO:0030261	chromosome condensation	biological_process	0.12481	1	3	2861	8	24160	gene-KI387_029868,gene-KI387_033085,gene-KI387_015500
GO:0019048	modulation by virus of host process	biological_process	0.12617	1	11	2861	57	24160	Novel01143,gene-KI387_032540,Novel04373,gene-KI387_033897,gene-KI387_029908,gene-KI387_022929,gene-KI387_030950,Novel00847,gene-KI387_027955,gene-KI387_002547,Novel00004
GO:0035821	modulation of process of other organism	biological_process	0.12617	1	11	2861	57	24160	Novel04373,gene-KI387_032540,Novel01143,gene-KI387_022929,gene-KI387_027955,gene-KI387_030950,Novel00847,gene-KI387_029908,gene-KI387_033897,gene-KI387_002547,Novel00004
GO:0044003	modulation by symbiont of host process	biological_process	0.12617	1	11	2861	57	24160	gene-KI387_002547,Novel00004,gene-KI387_032540,Novel01143,Novel04373,gene-KI387_029908,gene-KI387_033897,gene-KI387_027955,gene-KI387_022929,Novel00847,gene-KI387_030950
GO:0051817	modulation of process of other organism involved in symbiotic interaction	biological_process	0.12617	1	11	2861	57	24160	Novel00004,gene-KI387_002547,gene-KI387_029908,gene-KI387_033897,Novel00847,gene-KI387_022929,gene-KI387_030950,gene-KI387_027955,gene-KI387_032540,Novel01143,Novel04373
GO:0030111	regulation of Wnt signaling pathway	biological_process	0.12639	1	3	2861	11	24160	gene-KI387_015382,gene-KI387_015378,gene-KI387_015386
GO:0051336	regulation of hydrolase activity	biological_process	0.12674	1	10	2861	60	24160	gene-KI387_031655,gene-KI387_022919,gene-KI387_031700,Novel02371,gene-KI387_038504,Novel05197,Novel03833,gene-KI387_017389,Novel03286,gene-KI387_013606
GO:0043933	protein-containing complex subunit organization	biological_process	0.12678	1	54	2861	409	24160	gene-KI387_025953,Novel02165,Novel06516,gene-KI387_018528,gene-KI387_043920,gene-KI387_013415,gene-KI387_037721,gene-KI387_014405,gene-KI387_007444,gene-KI387_005255,gene-KI387_039089,gene-KI387_026648,gene-KI387_022830,gene-KI387_006020,gene-KI387_031888,gene-KI387_032240,gene-KI387_032382,gene-KI387_020214,gene-KI387_011900,Novel06909,gene-KI387_001044,gene-KI387_015196,gene-KI387_018529,Novel0…
GO:0034728	nucleosome organization	biological_process	0.12853	1	7	2861	38	24160	gene-KI387_032240,gene-KI387_031888,gene-KI387_039089,gene-KI387_021515,gene-KI387_037906,gene-KI387_043920,gene-KI387_022830
GO:0098797	plasma membrane protein complex	cellular_component	0.12994	1	13	2861	73	24160	gene-KI387_035155,gene-KI387_029517,gene-KI387_001044,gene-KI387_011453,Novel04282,gene-KI387_007551,gene-KI387_006267,gene-KI387_019115,Novel06492,Novel02515,Novel06791,gene-KI387_023507,gene-KI387_013376
GO:0008290	F-actin capping protein complex	cellular_component	0.13147	1	2	2861	7	24160	gene-KI387_015278,gene-KI387_018108
GO:0045735	nutrient reservoir activity	molecular_function	0.13272	1	15	2861	103	24160	Novel01006,gene-KI387_035343,Novel01810,gene-KI387_016143,gene-KI387_006333,gene-KI387_041190,Novel06980,gene-KI387_016057,gene-KI387_016055,gene-KI387_021210,Novel01809,Novel01489,gene-KI387_003655,Novel02991,Novel04019
GO:0046556	alpha-L-arabinofuranosidase activity	molecular_function	0.13384	1	2	2861	5	24160	Novel05016,gene-KI387_024587
GO:0010181	FMN binding	molecular_function	0.13447	1	11	2861	68	24160	Novel02631,gene-KI387_036938,gene-KI387_035213,gene-KI387_002293,gene-KI387_010017,gene-KI387_001596,gene-KI387_012138,gene-KI387_010014,Novel00211,gene-KI387_027994,gene-KI387_012878
GO:0015996	chlorophyll catabolic process	biological_process	0.13515	1	3	2861	10	24160	gene-KI387_033828,Novel04287,gene-KI387_019587
GO:0046149	pigment catabolic process	biological_process	0.13515	1	3	2861	10	24160	gene-KI387_019587,gene-KI387_033828,Novel04287
GO:0047746	chlorophyllase activity	molecular_function	0.13515	1	3	2861	10	24160	Novel04287,gene-KI387_033828,gene-KI387_019587
GO:0000313	organellar ribosome	cellular_component	0.13526	1	3	2861	12	24160	gene-KI387_025751,gene-KI387_012321,gene-KI387_033296
GO:0005761	mitochondrial ribosome	cellular_component	0.13526	1	3	2861	12	24160	gene-KI387_033296,gene-KI387_025751,gene-KI387_012321
GO:0003879	ATP phosphoribosyltransferase activity	molecular_function	0.13567	1	2	2861	8	24160	gene-KI387_018388,Novel02360
GO:1902911	protein kinase complex	cellular_component	0.13594	1	3	2861	11	24160	gene-KI387_022996,gene-KI387_005177,gene-KI387_014166
GO:0140097	catalytic activity, acting on DNA	molecular_function	0.13645	1	88	2861	600	24160	gene-KI387_031987,Novel06724,gene-KI387_021013,gene-KI387_025096,gene-KI387_010241,gene-KI387_015529,gene-KI387_033192,gene-KI387_035694,gene-KI387_035566,gene-KI387_020416,gene-KI387_032243,gene-KI387_020289,gene-KI387_026395,gene-KI387_020169,gene-KI387_035635,gene-KI387_013526,gene-KI387_028107,gene-KI387_015456,Novel04312,gene-KI387_008188,gene-KI387_033190,gene-KI387_001618,gene-KI387_034994…
GO:0000755	cytogamy	biological_process	0.13662	1	2	2861	5	24160	Novel05041,Novel04768
GO:0022413	reproductive process in single-celled organism	biological_process	0.13662	1	2	2861	5	24160	Novel05041,Novel04768
GO:0032220	plasma membrane fusion involved in cytogamy	biological_process	0.13662	1	2	2861	5	24160	Novel04768,Novel05041
GO:0040011	locomotion	biological_process	0.13791	1	18	2861	112	24160	gene-KI387_032237,gene-KI387_025607,gene-KI387_033776,gene-KI387_033088,gene-KI387_037720,gene-KI387_033671,gene-KI387_030434,Novel03431,Novel06367,gene-KI387_015750,gene-KI387_026490,gene-KI387_020056,gene-KI387_000228,gene-KI387_034676,gene-KI387_013946,gene-KI387_034738,gene-KI387_024993,gene-KI387_009420
GO:0004497	monooxygenase activity	molecular_function	0.13814	1	17	2861	100	24160	gene-KI387_039344,Novel02655,gene-KI387_039683,Novel03256,gene-KI387_024848,gene-KI387_023251,Novel02656,gene-KI387_010103,gene-KI387_027709,gene-KI387_010531,gene-KI387_001508,gene-KI387_031803,gene-KI387_010555,gene-KI387_010104,gene-KI387_016272,gene-KI387_008720,gene-KI387_008719
GO:0009309	amine biosynthetic process	biological_process	0.13853	1	4	2861	17	24160	gene-KI387_015766,Novel02721,Novel02360,gene-KI387_020578
GO:0042401	cellular biogenic amine biosynthetic process	biological_process	0.13853	1	4	2861	17	24160	gene-KI387_015766,Novel02721,Novel02360,gene-KI387_020578
GO:0016671	oxidoreductase activity, acting on a sulfur group of donors, disulfide as acceptor	molecular_function	0.13859	1	3	2861	15	24160	gene-KI387_003494,gene-KI387_002385,gene-KI387_003495
GO:0006928	movement of cell or subcellular component	biological_process	0.13961	1	31	2861	198	24160	Novel00908,gene-KI387_024634,gene-KI387_034972,gene-KI387_032237,gene-KI387_033088,gene-KI387_016802,gene-KI387_033776,gene-KI387_025607,gene-KI387_033671,gene-KI387_020535,gene-KI387_037720,gene-KI387_025960,Novel03431,gene-KI387_030434,gene-KI387_020056,gene-KI387_026490,gene-KI387_015750,gene-KI387_006299,gene-KI387_039261,Novel06367,gene-KI387_036167,gene-KI387_023866,gene-KI387_000228,gene-K…
GO:0016614	oxidoreductase activity, acting on CH-OH group of donors	molecular_function	0.13962	1	59	2861	392	24160	gene-KI387_032349,gene-KI387_042299,gene-KI387_035195,gene-KI387_043152,gene-KI387_010078,Novel07199,gene-KI387_023272,gene-KI387_034043,gene-KI387_033216,gene-KI387_037704,gene-KI387_001655,gene-KI387_033908,Novel03793,gene-KI387_027874,Novel04058,gene-KI387_037143,Novel06465,gene-KI387_034132,gene-KI387_016363,gene-KI387_018047,gene-KI387_014035,gene-KI387_037740,gene-KI387_013833,gene-KI387_01…
GO:0008614	pyridoxine metabolic process	biological_process	0.13967	1	1	2861	1	24160	Novel05221
GO:0008615	pyridoxine biosynthetic process	biological_process	0.13967	1	1	2861	1	24160	Novel05221
GO:0033856	pyridoxine 5-phosphate synthase activity	molecular_function	0.13967	1	1	2861	1	24160	Novel05221
GO:0015934	large ribosomal subunit	cellular_component	0.13998	1	3	2861	13	24160	gene-KI387_005360,gene-KI387_033296,gene-KI387_028836
GO:0016620	oxidoreductase activity, acting on the aldehyde or oxo group of donors, NAD or NADP as acceptor	molecular_function	0.14028	1	9	2861	50	24160	gene-KI387_037183,Novel01963,gene-KI387_002164,gene-KI387_019998,Novel05714,gene-KI387_038659,gene-KI387_005834,gene-KI387_010078,gene-KI387_032703
GO:0006952	defense response	biological_process	0.14064	1	52	2861	449	24160	gene-KI387_012051,gene-KI387_013007,Novel04665,Novel06167,Novel07195,Novel07019,gene-KI387_010611,gene-KI387_005177,gene-KI387_038903,gene-KI387_012362,gene-KI387_025090,Novel07258,gene-KI387_015142,gene-KI387_019579,Novel02778,gene-KI387_020323,gene-KI387_005051,gene-KI387_006901,gene-KI387_024355,gene-KI387_014694,gene-KI387_032566,gene-KI387_016202,gene-KI387_035702,gene-KI387_011072,gene-KI38…
GO:0098590	plasma membrane region	cellular_component	0.14114	1	3	2861	12	24160	Novel06492,gene-KI387_013376,gene-KI387_006267
GO:0071944	cell periphery	cellular_component	0.14199	1	61	2861	416	24160	gene-KI387_006267,gene-KI387_014251,gene-KI387_014886,gene-KI387_011453,gene-KI387_009892,gene-KI387_031285,gene-KI387_003186,gene-KI387_035155,gene-KI387_019747,gene-KI387_020660,gene-KI387_022330,gene-KI387_010355,gene-KI387_026648,gene-KI387_009338,Novel06791,Novel01974,gene-KI387_008890,Novel07230,gene-KI387_025103,gene-KI387_024161,gene-KI387_001044,gene-KI387_035205,gene-KI387_019034,gene-K…
GO:0009143	nucleoside triphosphate catabolic process	biological_process	0.14199	1	2	2861	7	24160	gene-KI387_008361,gene-KI387_001502
GO:0062023	collagen-containing extracellular matrix	cellular_component	0.14314	1	2	2861	6	24160	gene-KI387_021515,gene-KI387_005045
GO:0016791	phosphatase activity	molecular_function	0.14327	1	33	2861	198	24160	gene-KI387_032739,gene-KI387_016269,gene-KI387_032563,gene-KI387_028329,gene-KI387_018707,gene-KI387_005498,gene-KI387_014494,gene-KI387_016272,Novel07598,gene-KI387_027955,Novel04010,gene-KI387_022888,gene-KI387_000175,gene-KI387_018703,Novel05014,gene-KI387_013319,gene-KI387_027956,gene-KI387_022307,gene-KI387_007066,gene-KI387_034875,gene-KI387_017807,gene-KI387_033939,gene-KI387_002376,Novel0…
GO:0098519	nucleotide phosphatase activity, acting on free nucleotides	molecular_function	0.14455	1	13	2861	62	24160	gene-KI387_031524,gene-KI387_027956,gene-KI387_013319,gene-KI387_028329,Novel04312,gene-KI387_016272,gene-KI387_007279,gene-KI387_032739,gene-KI387_033939,gene-KI387_033192,gene-KI387_003803,gene-KI387_016269,gene-KI387_027955
GO:0002831	regulation of response to biotic stimulus	biological_process	0.14464	1	4	2861	19	24160	Novel07019,gene-KI387_010611,Novel07020,gene-KI387_012362
GO:0031347	regulation of defense response	biological_process	0.14464	1	4	2861	19	24160	Novel07019,gene-KI387_010611,Novel07020,gene-KI387_012362
GO:0045088	regulation of innate immune response	biological_process	0.14464	1	4	2861	19	24160	gene-KI387_010611,Novel07019,Novel07020,gene-KI387_012362
GO:0050662	obsolete coenzyme binding	molecular_function	0.14487	1	34	2861	236	24160	gene-KI387_011493,gene-KI387_032987,gene-KI387_039359,gene-KI387_033213,gene-KI387_039360,gene-KI387_017999,gene-KI387_037191,Novel06589,gene-KI387_025633,Novel05714,gene-KI387_039356,gene-KI387_033825,gene-KI387_002547,gene-KI387_032834,gene-KI387_025701,gene-KI387_039361,gene-KI387_037183,gene-KI387_007081,gene-KI387_025631,gene-KI387_033745,gene-KI387_037143,gene-KI387_005058,Novel06465,gene-K…
GO:0004379	glycylpeptide N-tetradecanoyltransferase activity	molecular_function	0.14487	1	2	2861	6	24160	gene-KI387_004196,Novel05471
GO:0019107	myristoyltransferase activity	molecular_function	0.14487	1	2	2861	6	24160	Novel05471,gene-KI387_004196
GO:0008064	regulation of actin polymerization or depolymerization	biological_process	0.1455	1	4	2861	20	24160	gene-KI387_026648,gene-KI387_018108,gene-KI387_015278,gene-KI387_025940
GO:0008154	actin polymerization or depolymerization	biological_process	0.1455	1	4	2861	20	24160	gene-KI387_015278,gene-KI387_025940,gene-KI387_018108,gene-KI387_026648
GO:0030041	actin filament polymerization	biological_process	0.1455	1	4	2861	20	24160	gene-KI387_026648,gene-KI387_018108,gene-KI387_015278,gene-KI387_025940
GO:0030832	regulation of actin filament length	biological_process	0.1455	1	4	2861	20	24160	gene-KI387_018108,gene-KI387_026648,gene-KI387_025940,gene-KI387_015278
GO:0030833	regulation of actin filament polymerization	biological_process	0.1455	1	4	2861	20	24160	gene-KI387_018108,gene-KI387_026648,gene-KI387_025940,gene-KI387_015278
GO:0032271	regulation of protein polymerization	biological_process	0.1455	1	4	2861	20	24160	gene-KI387_015278,gene-KI387_025940,gene-KI387_018108,gene-KI387_026648
GO:0032535	regulation of cellular component size	biological_process	0.1455	1	4	2861	20	24160	gene-KI387_015278,gene-KI387_025940,gene-KI387_026648,gene-KI387_018108
GO:0032956	regulation of actin cytoskeleton organization	biological_process	0.1455	1	4	2861	20	24160	gene-KI387_025940,gene-KI387_015278,gene-KI387_026648,gene-KI387_018108
GO:0032970	regulation of actin filament-based process	biological_process	0.1455	1	4	2861	20	24160	gene-KI387_026648,gene-KI387_018108,gene-KI387_015278,gene-KI387_025940
GO:0043254	regulation of protein-containing complex assembly	biological_process	0.1455	1	4	2861	20	24160	gene-KI387_025940,gene-KI387_015278,gene-KI387_018108,gene-KI387_026648
GO:0110053	regulation of actin filament organization	biological_process	0.1455	1	4	2861	20	24160	gene-KI387_026648,gene-KI387_018108,gene-KI387_025940,gene-KI387_015278
GO:1902903	regulation of supramolecular fiber organization	biological_process	0.1455	1	4	2861	20	24160	gene-KI387_015278,gene-KI387_025940,gene-KI387_018108,gene-KI387_026648
GO:0019700	organic phosphonate catabolic process	biological_process	0.14604	1	1	2861	1	24160	Novel03646
GO:0042651	thylakoid membrane	cellular_component	0.14644	1	6	2861	32	24160	gene-KI387_023678,gene-KI387_033419,gene-KI387_036372,gene-KI387_014403,gene-KI387_031000,gene-KI387_016931
GO:0055070	copper ion homeostasis	biological_process	0.14663	1	1	2861	1	24160	gene-KI387_029517
GO:0071949	FAD binding	molecular_function	0.14756	1	24	2861	137	24160	gene-KI387_024848,gene-KI387_011579,Novel02656,gene-KI387_026188,gene-KI387_010017,gene-KI387_034043,gene-KI387_039344,gene-KI387_011577,Novel05039,Novel03793,gene-KI387_008719,gene-KI387_008720,gene-KI387_014652,gene-KI387_001655,gene-KI387_031018,gene-KI387_010014,gene-KI387_010015,gene-KI387_039345,Novel01782,gene-KI387_027709,gene-KI387_010531,gene-KI387_014035,gene-KI387_009452,gene-KI387_03…
GO:0019030	icosahedral viral capsid	cellular_component	0.14768	1	1	2861	1	24160	Novel04072
GO:0039624	viral outer capsid	cellular_component	0.14768	1	1	2861	1	24160	Novel04072
GO:0047355	CDP-glycerol glycerophosphotransferase activity	molecular_function	0.14873	1	1	2861	1	24160	gene-KI387_019517
GO:0004984	olfactory receptor activity	molecular_function	0.14979	1	2	2861	5	24160	gene-KI387_029453,gene-KI387_030371
GO:0005758	mitochondrial intermembrane space	cellular_component	0.14997	1	1	2861	2	24160	gene-KI387_005969
GO:0016530	metallochaperone activity	molecular_function	0.14997	1	1	2861	2	24160	gene-KI387_005969
GO:0016531	copper chaperone activity	molecular_function	0.14997	1	1	2861	2	24160	gene-KI387_005969
GO:0031970	organelle envelope lumen	cellular_component	0.14997	1	1	2861	2	24160	gene-KI387_005969
GO:0044057	regulation of system process	biological_process	0.15002	1	4	2861	14	24160	gene-KI387_016269,Novel04537,gene-KI387_037477,Novel03458
GO:0008297	single-stranded DNA exodeoxyribonuclease activity	molecular_function	0.15017	1	1	2861	2	24160	gene-KI387_026729
GO:0045145	single-stranded DNA 5-3 exodeoxyribonuclease activity	molecular_function	0.15017	1	1	2861	2	24160	gene-KI387_026729
GO:0007165	signal transduction	biological_process	0.15117	1	130	2861	928	24160	Novel03819,gene-KI387_031811,gene-KI387_021105,gene-KI387_034145,gene-KI387_032938,gene-KI387_010355,gene-KI387_016205,Novel07208,gene-KI387_015386,gene-KI387_040864,gene-KI387_017389,gene-KI387_043879,gene-KI387_010786,gene-KI387_002356,gene-KI387_004449,Novel05050,Novel04360,gene-KI387_030580,gene-KI387_007332,Novel06117,gene-KI387_032732,gene-KI387_035995,gene-KI387_003859,Novel06199,Novel0653…
GO:0022618	ribonucleoprotein complex assembly	biological_process	0.15119	1	4	2861	17	24160	Novel06516,gene-KI387_032225,gene-KI387_020214,gene-KI387_020237
GO:0071826	ribonucleoprotein complex subunit organization	biological_process	0.15119	1	4	2861	17	24160	gene-KI387_020237,gene-KI387_020214,gene-KI387_032225,Novel06516
GO:0044550	secondary metabolite biosynthetic process	biological_process	0.15205	1	5	2861	22	24160	gene-KI387_020056,gene-KI387_020811,gene-KI387_022318,gene-KI387_006085,Novel04038
GO:0039633	killing by virus of host cell	biological_process	0.15223	1	1	2861	2	24160	Novel03286
GO:0044659	viral release from host cell by cytolysis	biological_process	0.15223	1	1	2861	2	24160	Novel03286
GO:0031323	regulation of cellular metabolic process	biological_process	0.15311	1	256	2861	1892	24160	Novel00180,gene-KI387_009136,Novel02309,gene-KI387_010355,Novel02565,gene-KI387_016057,gene-KI387_035628,gene-KI387_035603,gene-KI387_014197,gene-KI387_023475,gene-KI387_031818,gene-KI387_019866,gene-KI387_012871,Novel01846,gene-KI387_001386,gene-KI387_013082,gene-KI387_035455,gene-KI387_013376,gene-KI387_013319,gene-KI387_028185,gene-KI387_041113,Novel01143,Novel06011,Novel04550,gene-KI387_00440…
GO:0065008	regulation of biological quality	biological_process	0.15317	1	53	2861	423	24160	gene-KI387_006020,gene-KI387_026648,gene-KI387_023671,gene-KI387_021462,Novel03458,gene-KI387_013415,gene-KI387_025372,gene-KI387_021085,gene-KI387_025953,gene-KI387_005255,gene-KI387_037477,gene-KI387_006240,gene-KI387_016802,Novel03173,gene-KI387_017879,gene-KI387_038017,gene-KI387_033187,Novel03004,gene-KI387_011870,gene-KI387_005247,Novel04857,gene-KI387_015278,gene-KI387_025934,gene-KI387_01…
GO:0003964	RNA-directed DNA polymerase activity	molecular_function	0.15342	1	3	2861	9	24160	gene-KI387_032243,Novel05767,gene-KI387_020416
GO:0008113	peptide-methionine (S)-S-oxide reductase activity	molecular_function	0.15359	1	2	2861	8	24160	gene-KI387_003494,gene-KI387_003495
GO:0098588	bounding membrane of organelle	cellular_component	0.1547	1	43	2861	293	24160	gene-KI387_020471,Novel00743,gene-KI387_039966,gene-KI387_007321,gene-KI387_021916,gene-KI387_015729,Novel06749,gene-KI387_002463,gene-KI387_030994,Novel03446,gene-KI387_035224,gene-KI387_020360,gene-KI387_018291,Novel05114,gene-KI387_012544,gene-KI387_042546,gene-KI387_023573,gene-KI387_022676,Novel02306,Novel02448,gene-KI387_031655,gene-KI387_030500,Novel03486,gene-KI387_002037,Novel07508,Novel…
GO:0062125	regulation of mitochondrial gene expression	biological_process	0.15497	1	1	2861	1	24160	Novel03665
GO:0070129	regulation of mitochondrial translation	biological_process	0.15497	1	1	2861	1	24160	Novel03665
GO:0070131	positive regulation of mitochondrial translation	biological_process	0.15497	1	1	2861	1	24160	Novel03665
GO:0015128	gluconate transmembrane transporter activity	molecular_function	0.15504	1	1	2861	1	24160	gene-KI387_005704
GO:0035429	gluconate transmembrane transport	biological_process	0.15504	1	1	2861	1	24160	gene-KI387_005704
GO:0005088	Ras guanyl-nucleotide exchange factor activity	molecular_function	0.15531	1	4	2861	18	24160	Novel00918,gene-KI387_030295,gene-KI387_009841,gene-KI387_004726
GO:0005089	Rho guanyl-nucleotide exchange factor activity	molecular_function	0.15531	1	4	2861	18	24160	gene-KI387_004726,gene-KI387_009841,Novel00918,gene-KI387_030295
GO:0005244	voltage-gated ion channel activity	molecular_function	0.15603	1	7	2861	34	24160	Novel01258,gene-KI387_023507,Novel00827,gene-KI387_036725,gene-KI387_014593,gene-KI387_032296,gene-KI387_008890
GO:0022832	voltage-gated channel activity	molecular_function	0.15603	1	7	2861	34	24160	Novel01258,gene-KI387_023507,Novel00827,gene-KI387_008890,gene-KI387_036725,gene-KI387_014593,gene-KI387_032296
GO:0071973	bacterial-type flagellum-dependent cell motility	biological_process	0.15658	1	5	2861	24	24160	gene-KI387_032237,Novel06367,gene-KI387_037720,gene-KI387_033671,gene-KI387_033776
GO:0031625	ubiquitin protein ligase binding	molecular_function	0.15675	1	3	2861	11	24160	gene-KI387_032618,gene-KI387_022673,gene-KI387_032870
GO:0044389	ubiquitin-like protein ligase binding	molecular_function	0.15675	1	3	2861	11	24160	gene-KI387_022673,gene-KI387_032870,gene-KI387_032618
GO:0006013	mannose metabolic process	biological_process	0.15769	1	4	2861	16	24160	gene-KI387_032581,Novel02291,gene-KI387_032579,gene-KI387_032582
GO:0090066	regulation of anatomical structure size	biological_process	0.15833	1	7	2861	37	24160	Novel03458,gene-KI387_037477,gene-KI387_015278,gene-KI387_025940,gene-KI387_026648,gene-KI387_018108,Novel02791
GO:0001539	cilium or flagellum-dependent cell motility	biological_process	0.15859	1	6	2861	32	24160	gene-KI387_032237,Novel06367,gene-KI387_037720,gene-KI387_033671,gene-KI387_025607,gene-KI387_033776
GO:0000166	nucleotide binding	molecular_function	0.15864	1	524	2861	3703	24160	gene-KI387_023671,Novel00211,Novel01779,gene-KI387_032938,gene-KI387_002510,gene-KI387_034145,gene-KI387_033369,gene-KI387_040864,gene-KI387_033776,gene-KI387_013319,gene-KI387_039345,gene-KI387_001108,gene-KI387_034228,gene-KI387_017652,gene-KI387_002644,gene-KI387_036867,gene-KI387_026009,gene-KI387_019050,gene-KI387_026739,gene-KI387_017481,gene-KI387_026188,gene-KI387_012064,gene-KI387_033676…
GO:1901265	nucleoside phosphate binding	molecular_function	0.15864	1	524	2861	3703	24160	Novel06979,gene-KI387_021013,gene-KI387_022018,gene-KI387_000778,gene-KI387_035194,Novel00200,gene-KI387_031884,gene-KI387_002650,Novel03019,gene-KI387_038993,gene-KI387_032778,Novel06443,gene-KI387_029109,gene-KI387_002324,gene-KI387_015215,gene-KI387_040682,gene-KI387_001525,Novel03221,Novel03045,gene-KI387_024556,gene-KI387_021603,gene-KI387_042060,gene-KI387_003575,gene-KI387_029746,Novel0118…
GO:0051701	interaction with host	biological_process	0.15911	1	25	2861	167	24160	gene-KI387_027591,gene-KI387_010228,gene-KI387_013495,Novel04373,gene-KI387_032037,gene-KI387_039451,Novel00988,gene-KI387_032540,Novel01143,Novel04072,Novel00847,gene-KI387_027955,gene-KI387_029908,gene-KI387_010283,Novel03286,gene-KI387_002547,Novel03232,Novel00004,gene-KI387_006774,Novel05763,Novel06197,gene-KI387_030950,gene-KI387_008394,gene-KI387_022929,gene-KI387_033897
GO:0004318	enoyl-[acyl-carrier-protein] reductase (NADH) activity	molecular_function	0.16054	1	1	2861	1	24160	gene-KI387_019034
GO:0006914	autophagy	biological_process	0.16172	1	10	2861	63	24160	gene-KI387_001747,gene-KI387_015140,gene-KI387_008999,gene-KI387_013015,gene-KI387_006020,gene-KI387_005905,gene-KI387_009794,gene-KI387_005177,gene-KI387_014166,gene-KI387_015068
GO:0061919	process utilizing autophagic mechanism	biological_process	0.16172	1	10	2861	63	24160	gene-KI387_005905,gene-KI387_013015,gene-KI387_006020,gene-KI387_008999,gene-KI387_015140,gene-KI387_001747,gene-KI387_015068,gene-KI387_014166,gene-KI387_005177,gene-KI387_009794
GO:0016872	intramolecular lyase activity	molecular_function	0.16177	1	4	2861	23	24160	gene-KI387_007364,gene-KI387_028163,Novel03847,gene-KI387_016358
GO:0030532	small nuclear ribonucleoprotein complex	cellular_component	0.16243	1	4	2861	19	24160	gene-KI387_032225,gene-KI387_000026,gene-KI387_020214,gene-KI387_020237
GO:0097525	spliceosomal snRNP complex	cellular_component	0.16243	1	4	2861	19	24160	gene-KI387_032225,gene-KI387_020237,gene-KI387_020214,gene-KI387_000026
GO:0120114	Sm-like protein family complex	cellular_component	0.16243	1	4	2861	19	24160	gene-KI387_020214,gene-KI387_000026,gene-KI387_020237,gene-KI387_032225
GO:0008883	glutamyl-tRNA reductase activity	molecular_function	0.16246	1	3	2861	11	24160	Novel01963,gene-KI387_019998,gene-KI387_032703
GO:0039664	lysis of host organelle involved in viral entry into host cell	biological_process	0.16414	1	1	2861	1	24160	gene-KI387_008394
GO:0019915	lipid storage	biological_process	0.16435	1	2	2861	7	24160	gene-KI387_025372,gene-KI387_022929
GO:0007517	muscle organ development	biological_process	0.16441	1	1	2861	2	24160	gene-KI387_026504
GO:0061061	muscle structure development	biological_process	0.16441	1	1	2861	2	24160	gene-KI387_026504
GO:0044000	movement in host	biological_process	0.165	1	4	2861	20	24160	Novel05763,Novel06197,Novel00988,gene-KI387_039451
GO:0046739	transport of virus in multicellular host	biological_process	0.165	1	4	2861	20	24160	Novel05763,Novel06197,Novel00988,gene-KI387_039451
GO:0046740	transport of virus in host, cell to cell	biological_process	0.165	1	4	2861	20	24160	Novel06197,Novel05763,Novel00988,gene-KI387_039451
GO:1902586	multi-organism intercellular transport	biological_process	0.165	1	4	2861	20	24160	Novel00988,gene-KI387_039451,Novel06197,Novel05763
GO:0005622	intracellular	cellular_component	0.16511	1	474	2861	3839	24160	gene-KI387_039966,gene-KI387_028836,gene-KI387_015993,Novel03044,gene-KI387_016931,Novel04744,Novel06749,gene-KI387_032266,gene-KI387_033881,gene-KI387_038880,Novel00554,gene-KI387_030994,Novel03139,gene-KI387_029453,gene-KI387_033736,gene-KI387_012566,gene-KI387_032737,gene-KI387_001295,gene-KI387_013012,gene-KI387_032732,Novel04360,Novel05545,Novel02360,Novel05969,gene-KI387_023779,gene-KI387_0…
GO:0005230	extracellular ligand-gated ion channel activity	molecular_function	0.16729	1	9	2861	39	24160	gene-KI387_034145,gene-KI387_019181,gene-KI387_041763,gene-KI387_015386,gene-KI387_000413,gene-KI387_031011,gene-KI387_021443,gene-KI387_018969,gene-KI387_015382
GO:0016757	transferase activity, transferring glycosyl groups	molecular_function	0.16835	1	84	2861	558	24160	gene-KI387_009169,gene-KI387_022543,gene-KI387_032496,gene-KI387_020659,Novel00315,gene-KI387_032655,gene-KI387_015568,gene-KI387_025648,gene-KI387_004589,Novel06222,gene-KI387_018929,gene-KI387_012559,Novel01393,Novel06221,gene-KI387_029024,gene-KI387_018777,gene-KI387_019789,Novel04282,gene-KI387_021456,gene-KI387_014717,gene-KI387_034367,Novel02360,gene-KI387_031805,gene-KI387_002763,Novel0332…
GO:0015099	nickel cation transmembrane transporter activity	molecular_function	0.16849	1	1	2861	1	24160	gene-KI387_008890
GO:0015675	nickel cation transport	biological_process	0.16849	1	1	2861	1	24160	gene-KI387_008890
GO:0035444	nickel cation transmembrane transport	biological_process	0.16849	1	1	2861	1	24160	gene-KI387_008890
GO:0006816	calcium ion transport	biological_process	0.16913	1	5	2861	25	24160	gene-KI387_023507,gene-KI387_039451,gene-KI387_039683,gene-KI387_025376,Novel06197
GO:0050794	regulation of cellular process	biological_process	0.16919	1	400	2861	3028	24160	Novel02371,gene-KI387_015068,gene-KI387_015168,Novel00854,gene-KI387_012289,gene-KI387_028604,Novel00104,gene-KI387_017882,Novel03427,Novel04215,gene-KI387_012275,gene-KI387_015140,gene-KI387_041451,gene-KI387_024178,gene-KI387_035343,Novel02996,gene-KI387_031987,gene-KI387_028863,gene-KI387_035556,Novel02501,Novel06186,gene-KI387_026644,gene-KI387_024913,gene-KI387_012165,gene-KI387_020090,gene-…
GO:0040012	regulation of locomotion	biological_process	0.16966	1	4	2861	15	24160	gene-KI387_015750,gene-KI387_009420,gene-KI387_033088,gene-KI387_034676
GO:0018298	protein-chromophore linkage	biological_process	0.17067	1	2	2861	5	24160	gene-KI387_021666,gene-KI387_029371
GO:0015658	branched-chain amino acid transmembrane transporter activity	molecular_function	0.17168	1	1	2861	1	24160	gene-KI387_018969
GO:0015803	branched-chain amino acid transport	biological_process	0.17168	1	1	2861	1	24160	gene-KI387_018969
GO:0016413	O-acetyltransferase activity	molecular_function	0.17168	1	3	2861	11	24160	gene-KI387_002529,Novel04243,gene-KI387_002517
GO:0018836	alkylmercury lyase activity	molecular_function	0.17216	1	1	2861	1	24160	gene-KI387_012666
GO:0018941	organomercury metabolic process	biological_process	0.17216	1	1	2861	1	24160	gene-KI387_012666
GO:0018942	organometal metabolic process	biological_process	0.17216	1	1	2861	1	24160	gene-KI387_012666
GO:0046413	organomercury catabolic process	biological_process	0.17216	1	1	2861	1	24160	gene-KI387_012666
GO:0034704	calcium channel complex	cellular_component	0.17241	1	4	2861	17	24160	gene-KI387_023507,Novel06197,gene-KI387_019115,Novel02515
GO:0044036	cell wall macromolecule metabolic process	biological_process	0.17261	1	7	2861	44	24160	gene-KI387_020640,gene-KI387_014522,gene-KI387_009338,gene-KI387_019179,gene-KI387_014523,gene-KI387_042546,gene-KI387_014524
GO:0031332	RNAi effector complex	cellular_component	0.17277	1	1	2861	1	24160	Novel06149
GO:0033167	ARC complex	cellular_component	0.17277	1	1	2861	1	24160	Novel06149
GO:0008772	[isocitrate dehydrogenase (NADP+)] kinase activity	molecular_function	0.17355	1	1	2861	1	24160	gene-KI387_002376
GO:0016556	mRNA modification	biological_process	0.17358	1	3	2861	12	24160	gene-KI387_010975,gene-KI387_037852,gene-KI387_032349
GO:0080009	mRNA methylation	biological_process	0.17358	1	3	2861	12	24160	gene-KI387_037852,gene-KI387_010975,gene-KI387_032349
GO:0023052	signaling	biological_process	0.17359	1	131	2861	946	24160	gene-KI387_032906,gene-KI387_020237,gene-KI387_017807,gene-KI387_042546,gene-KI387_001173,gene-KI387_015382,gene-KI387_021665,gene-KI387_027035,gene-KI387_032962,gene-KI387_014854,gene-KI387_012326,Novel06427,gene-KI387_032037,gene-KI387_038879,gene-KI387_015378,gene-KI387_009389,gene-KI387_025096,gene-KI387_009411,gene-KI387_001835,gene-KI387_002517,gene-KI387_038812,gene-KI387_001148,gene-KI387…
GO:0001907	killing by symbiont of host cells	biological_process	0.17382	1	4	2861	19	24160	Novel03286,gene-KI387_010228,gene-KI387_027591,gene-KI387_032037
GO:0009888	tissue development	biological_process	0.17428	1	7	2861	39	24160	gene-KI387_020656,Novel01894,gene-KI387_039488,Novel01910,Novel02989,gene-KI387_024352,gene-KI387_023574
GO:0004022	alcohol dehydrogenase (NAD+) activity	molecular_function	0.17544	1	1	2861	1	24160	gene-KI387_002644
GO:0015945	methanol metabolic process	biological_process	0.17544	1	1	2861	1	24160	gene-KI387_002644
GO:0015946	methanol oxidation	biological_process	0.17544	1	1	2861	1	24160	gene-KI387_002644
GO:0018455	alcohol dehydrogenase [NAD(P)+] activity	molecular_function	0.17544	1	1	2861	1	24160	gene-KI387_002644
GO:0034308	primary alcohol metabolic process	biological_process	0.17544	1	1	2861	1	24160	gene-KI387_002644
GO:0035306	positive regulation of dephosphorylation	biological_process	0.17556	1	1	2861	1	24160	Novel06145
GO:0035307	positive regulation of protein dephosphorylation	biological_process	0.17556	1	1	2861	1	24160	Novel06145
GO:0071595	Nem1-Spo7 phosphatase complex	cellular_component	0.17556	1	1	2861	1	24160	Novel06145
GO:0003978	UDP-glucose 4-epimerase activity	molecular_function	0.17556	1	1	2861	1	24160	Novel01329
GO:0002143	tRNA wobble position uridine thiolation	biological_process	0.17556	1	1	2861	1	24160	Novel05050
GO:0008907	integrase activity	molecular_function	0.1764	1	1	2861	2	24160	gene-KI387_001374
GO:0019751	polyol metabolic process	biological_process	0.17707	1	6	2861	37	24160	gene-KI387_001322,gene-KI387_005875,gene-KI387_016358,Novel03847,gene-KI387_007364,gene-KI387_028163
GO:0007204	positive regulation of cytosolic calcium ion concentration	biological_process	0.17802	1	1	2861	2	24160	gene-KI387_025376
GO:0051480	regulation of cytosolic calcium ion concentration	biological_process	0.17802	1	1	2861	2	24160	gene-KI387_025376
GO:0060402	calcium ion transport into cytosol	biological_process	0.17802	1	1	2861	2	24160	gene-KI387_025376
GO:0097553	calcium ion transmembrane import into cytosol	biological_process	0.17802	1	1	2861	2	24160	gene-KI387_025376
GO:0098659	inorganic cation import across plasma membrane	biological_process	0.17802	1	1	2861	2	24160	gene-KI387_025376
GO:0098703	calcium ion import across plasma membrane	biological_process	0.17802	1	1	2861	2	24160	gene-KI387_025376
GO:0099587	inorganic ion import across plasma membrane	biological_process	0.17802	1	1	2861	2	24160	gene-KI387_025376
GO:1902656	calcium ion import into cytosol	biological_process	0.17802	1	1	2861	2	24160	gene-KI387_025376
GO:1902495	transmembrane transporter complex	cellular_component	0.17856	1	6	2861	30	24160	Novel06197,gene-KI387_023507,Novel02515,gene-KI387_001044,gene-KI387_029517,gene-KI387_019115
GO:1990351	transporter complex	cellular_component	0.17856	1	6	2861	30	24160	gene-KI387_023507,Novel06197,gene-KI387_029517,gene-KI387_019115,Novel02515,gene-KI387_001044
GO:0050852	T cell receptor signaling pathway	biological_process	0.17914	1	2	2861	5	24160	gene-KI387_035995,gene-KI387_032563
GO:0065003	protein-containing complex assembly	biological_process	0.1795	1	47	2861	368	24160	Novel06167,gene-KI387_003620,gene-KI387_000695,gene-KI387_019400,gene-KI387_018108,gene-KI387_032225,gene-KI387_029831,gene-KI387_023418,gene-KI387_020739,Novel03150,gene-KI387_010283,gene-KI387_025940,gene-KI387_039858,gene-KI387_020237,gene-KI387_037906,gene-KI387_015120,gene-KI387_015456,gene-KI387_025265,gene-KI387_015574,gene-KI387_014403,Novel04360,gene-KI387_034765,gene-KI387_011870,gene-K…
GO:0009523	photosystem II	cellular_component	0.18048	1	14	2861	85	24160	gene-KI387_031000,Novel01759,gene-KI387_023721,gene-KI387_023678,gene-KI387_007063,gene-KI387_010208,Novel03427,Novel03004,Novel03139,gene-KI387_036372,gene-KI387_014403,Novel05585,Novel01207,gene-KI387_033419
GO:0090729	toxin activity	molecular_function	0.18236	1	5	2861	25	24160	gene-KI387_004914,Novel07230,gene-KI387_004916,Novel05014,gene-KI387_013607
GO:0000288	nuclear-transcribed mRNA catabolic process, deadenylation-dependent decay	biological_process	0.18348	1	1	2861	3	24160	gene-KI387_019276
GO:0000290	deadenylation-dependent decapping of nuclear-transcribed mRNA	biological_process	0.18348	1	1	2861	3	24160	gene-KI387_019276
GO:0110154	RNA decapping	biological_process	0.18348	1	1	2861	3	24160	gene-KI387_019276
GO:0110156	methylguanosine-cap decapping	biological_process	0.18348	1	1	2861	3	24160	gene-KI387_019276
GO:0008283	cell population proliferation	biological_process	0.18365	1	4	2861	27	24160	Novel03153,gene-KI387_016343,gene-KI387_014392,Novel03286
GO:0051179	localization	biological_process	0.18376	1	399	2861	3043	24160	gene-KI387_022549,Novel05218,gene-KI387_035603,gene-KI387_012263,gene-KI387_022719,gene-KI387_001029,gene-KI387_019866,gene-KI387_002697,Novel05896,gene-KI387_012976,gene-KI387_033776,gene-KI387_010228,gene-KI387_004329,gene-KI387_013376,gene-KI387_005260,gene-KI387_014059,Novel03649,gene-KI387_011378,gene-KI387_002882,gene-KI387_019344,Novel05615,Novel04004,Novel04351,Novel06026,gene-KI387_03467…
GO:0045786	negative regulation of cell cycle	biological_process	0.18394	1	7	2861	40	24160	Novel04864,gene-KI387_016654,gene-KI387_032023,gene-KI387_011802,gene-KI387_031285,gene-KI387_037640,Novel04146
GO:0006284	base-excision repair	biological_process	0.18458	1	5	2861	22	24160	Novel06724,gene-KI387_034863,gene-KI387_010074,gene-KI387_015529,gene-KI387_034862
GO:0060401	cytosolic calcium ion transport	biological_process	0.18631	1	2	2861	8	24160	gene-KI387_025376,Novel06197
GO:0070509	calcium ion import	biological_process	0.18631	1	2	2861	8	24160	Novel06197,gene-KI387_025376
GO:1990542	mitochondrial transmembrane transport	biological_process	0.18651	1	6	2861	33	24160	gene-KI387_022317,gene-KI387_002463,Novel04001,Novel06197,gene-KI387_039966,gene-KI387_015775
GO:0034654	nucleobase-containing compound biosynthetic process	biological_process	0.18661	1	275	2861	2146	24160	Novel03542,Novel07077,gene-KI387_016064,gene-KI387_001302,gene-KI387_033682,gene-KI387_034376,gene-KI387_033567,gene-KI387_037852,gene-KI387_004945,Novel01941,Novel01680,gene-KI387_001148,gene-KI387_007107,Novel02498,gene-KI387_016525,Novel05882,Novel01029,gene-KI387_036740,gene-KI387_035201,gene-KI387_010241,gene-KI387_020169,gene-KI387_012487,gene-KI387_016788,gene-KI387_039405,gene-KI387_00899…
GO:0071554	cell wall organization or biogenesis	biological_process	0.18794	1	22	2861	148	24160	gene-KI387_006254,gene-KI387_030199,gene-KI387_014522,Novel03399,gene-KI387_037977,gene-KI387_003828,Novel01742,Novel03780,gene-KI387_009490,gene-KI387_000422,gene-KI387_014523,gene-KI387_019179,gene-KI387_014524,gene-KI387_029394,gene-KI387_005848,gene-KI387_009338,gene-KI387_020640,gene-KI387_031520,gene-KI387_043349,gene-KI387_019866,gene-KI387_026504,gene-KI387_042546
GO:0006812	cation transport	biological_process	0.18853	1	102	2861	779	24160	Novel01457,gene-KI387_025940,gene-KI387_020140,gene-KI387_002037,gene-KI387_038993,gene-KI387_011577,Novel06012,gene-KI387_029421,gene-KI387_037724,Novel05763,Novel06197,gene-KI387_016322,gene-KI387_037067,gene-KI387_023574,gene-KI387_009073,gene-KI387_022986,gene-KI387_011579,gene-KI387_024124,gene-KI387_039570,gene-KI387_019343,gene-KI387_024034,Novel02199,gene-KI387_024552,gene-KI387_038094,ge…
GO:0006620	posttranslational protein targeting to endoplasmic reticulum membrane	biological_process	0.18877	1	2	2861	6	24160	gene-KI387_018291,gene-KI387_012544
GO:0031204	posttranslational protein targeting to membrane, translocation	biological_process	0.18877	1	2	2861	6	24160	gene-KI387_012544,gene-KI387_018291
GO:0031205	endoplasmic reticulum Sec complex	cellular_component	0.18877	1	2	2861	6	24160	gene-KI387_012544,gene-KI387_018291
GO:0031207	Sec62/Sec63 complex	cellular_component	0.18877	1	2	2861	6	24160	gene-KI387_018291,gene-KI387_012544
GO:0006729	tetrahydrobiopterin biosynthetic process	biological_process	0.19005	1	1	2861	3	24160	gene-KI387_001322
GO:0008124	4-alpha-hydroxytetrahydrobiopterin dehydratase activity	molecular_function	0.19005	1	1	2861	3	24160	gene-KI387_001322
GO:0034311	diol metabolic process	biological_process	0.19005	1	1	2861	3	24160	gene-KI387_001322
GO:0034312	diol biosynthetic process	biological_process	0.19005	1	1	2861	3	24160	gene-KI387_001322
GO:0046146	tetrahydrobiopterin metabolic process	biological_process	0.19005	1	1	2861	3	24160	gene-KI387_001322
GO:0060271	cilium assembly	biological_process	0.19047	1	3	2861	11	24160	Novel02313,gene-KI387_019866,gene-KI387_025607
GO:0120031	plasma membrane bounded cell projection assembly	biological_process	0.19047	1	3	2861	11	24160	gene-KI387_025607,gene-KI387_019866,Novel02313
GO:0070588	calcium ion transmembrane transport	biological_process	0.19136	1	3	2861	14	24160	gene-KI387_025376,gene-KI387_023507,Novel06197
GO:0004620	phospholipase activity	molecular_function	0.19265	1	3	2861	12	24160	Novel03194,gene-KI387_021407,Novel06441
GO:0002097	tRNA wobble base modification	biological_process	0.19301	1	7	2861	38	24160	gene-KI387_023060,gene-KI387_027887,gene-KI387_030368,Novel05393,Novel05050,gene-KI387_010074,gene-KI387_013169
GO:0034464	BBSome	cellular_component	0.1932	1	2	2861	6	24160	gene-KI387_019866,Novel02313
GO:0005515	protein binding	molecular_function	0.1935	1	628	2861	4613	24160	gene-KI387_017912,gene-KI387_038049,gene-KI387_010377,gene-KI387_033088,gene-KI387_020535,gene-KI387_015065,gene-KI387_015750,gene-KI387_032126,gene-KI387_033939,gene-KI387_032870,gene-KI387_000579,gene-KI387_017616,Novel02499,gene-KI387_017380,gene-KI387_034743,gene-KI387_031350,gene-KI387_041952,Novel04286,gene-KI387_007834,gene-KI387_012794,Novel00657,gene-KI387_000411,gene-KI387_006299,gene-K…
GO:0006357	regulation of transcription by RNA polymerase II	biological_process	0.1939	1	16	2861	115	24160	gene-KI387_019594,gene-KI387_013224,gene-KI387_041113,gene-KI387_016802,gene-KI387_039405,Novel02269,Novel04174,gene-KI387_013082,gene-KI387_037852,gene-KI387_028107,gene-KI387_001644,gene-KI387_027350,gene-KI387_016525,Novel05975,gene-KI387_025940,Novel02565
GO:0048519	negative regulation of biological process	biological_process	0.1941	1	39	2861	277	24160	gene-KI387_022908,Novel00083,gene-KI387_015278,gene-KI387_015386,gene-KI387_037910,gene-KI387_032023,gene-KI387_011802,gene-KI387_031285,gene-KI387_024848,Novel06919,Novel00556,gene-KI387_022303,gene-KI387_026648,gene-KI387_019276,gene-KI387_016654,Novel02565,Novel04864,gene-KI387_013606,Novel00180,Novel06149,gene-KI387_037640,gene-KI387_015378,gene-KI387_010359,gene-KI387_032540,gene-KI387_01810…
GO:0019050	suppression by virus of host apoptotic process	biological_process	0.19653	1	2	2861	7	24160	gene-KI387_032540,gene-KI387_002547
GO:0033668	negative regulation by symbiont of host apoptotic process	biological_process	0.19653	1	2	2861	7	24160	gene-KI387_002547,gene-KI387_032540
GO:0052041	negative regulation by symbiont of host programmed cell death	biological_process	0.19653	1	2	2861	7	24160	gene-KI387_002547,gene-KI387_032540
GO:0005811	lipid droplet	cellular_component	0.19738	1	3	2861	15	24160	gene-KI387_002517,Novel04060,gene-KI387_002529
GO:0012511	monolayer-surrounded lipid storage body	cellular_component	0.19738	1	3	2861	15	24160	gene-KI387_002517,Novel04060,gene-KI387_002529
GO:0009890	negative regulation of biosynthetic process	biological_process	0.19765	1	9	2861	52	24160	gene-KI387_022303,Novel00556,Novel00180,Novel04215,Novel02501,gene-KI387_008144,Novel00083,gene-KI387_010359,gene-KI387_022908
GO:0010558	negative regulation of macromolecule biosynthetic process	biological_process	0.19765	1	9	2861	52	24160	gene-KI387_010359,Novel00083,gene-KI387_022908,gene-KI387_022303,Novel00556,Novel00180,Novel04215,Novel02501,gene-KI387_008144
GO:0031327	negative regulation of cellular biosynthetic process	biological_process	0.19765	1	9	2861	52	24160	Novel00083,gene-KI387_010359,gene-KI387_022908,Novel00180,Novel04215,gene-KI387_008144,Novel02501,gene-KI387_022303,Novel00556
GO:2000113	negative regulation of cellular macromolecule biosynthetic process	biological_process	0.19765	1	9	2861	52	24160	gene-KI387_022303,Novel00556,Novel00180,Novel04215,gene-KI387_008144,Novel02501,gene-KI387_010359,Novel00083,gene-KI387_022908
GO:0044391	ribosomal subunit	cellular_component	0.198	1	3	2861	16	24160	gene-KI387_028836,gene-KI387_005360,gene-KI387_033296
GO:0097190	apoptotic signaling pathway	biological_process	0.19804	1	2	2861	6	24160	gene-KI387_016205,gene-KI387_032285
GO:0000904	cell morphogenesis involved in differentiation	biological_process	0.19816	1	3	2861	14	24160	gene-KI387_026490,gene-KI387_013946,Novel03431
GO:0007409	axonogenesis	biological_process	0.19816	1	3	2861	14	24160	gene-KI387_013946,gene-KI387_026490,Novel03431
GO:0007411	axon guidance	biological_process	0.19816	1	3	2861	14	24160	Novel03431,gene-KI387_013946,gene-KI387_026490
GO:0032989	cellular component morphogenesis	biological_process	0.19816	1	3	2861	14	24160	Novel03431,gene-KI387_026490,gene-KI387_013946
GO:0032990	cell part morphogenesis	biological_process	0.19816	1	3	2861	14	24160	gene-KI387_026490,gene-KI387_013946,Novel03431
GO:0048667	cell morphogenesis involved in neuron differentiation	biological_process	0.19816	1	3	2861	14	24160	Novel03431,gene-KI387_026490,gene-KI387_013946
GO:0048812	neuron projection morphogenesis	biological_process	0.19816	1	3	2861	14	24160	gene-KI387_013946,gene-KI387_026490,Novel03431
GO:0048858	cell projection morphogenesis	biological_process	0.19816	1	3	2861	14	24160	gene-KI387_026490,gene-KI387_013946,Novel03431
GO:0061564	axon development	biological_process	0.19816	1	3	2861	14	24160	Novel03431,gene-KI387_013946,gene-KI387_026490
GO:0097485	neuron projection guidance	biological_process	0.19816	1	3	2861	14	24160	gene-KI387_013946,gene-KI387_026490,Novel03431
GO:0120039	plasma membrane bounded cell projection morphogenesis	biological_process	0.19816	1	3	2861	14	24160	Novel03431,gene-KI387_013946,gene-KI387_026490
GO:0012507	ER to Golgi transport vesicle membrane	cellular_component	0.19853	1	9	2861	51	24160	Novel03486,gene-KI387_000561,gene-KI387_020360,gene-KI387_003034,gene-KI387_000035,Novel05114,gene-KI387_020721,Novel06749,gene-KI387_029452
GO:0030127	COPII vesicle coat	cellular_component	0.19853	1	9	2861	51	24160	gene-KI387_020360,Novel03486,gene-KI387_000561,gene-KI387_020721,Novel06749,gene-KI387_029452,gene-KI387_003034,gene-KI387_000035,Novel05114
GO:0030134	COPII-coated ER to Golgi transport vesicle	cellular_component	0.19853	1	9	2861	51	24160	gene-KI387_020360,gene-KI387_000561,Novel03486,gene-KI387_029452,gene-KI387_020721,Novel06749,gene-KI387_003034,gene-KI387_000035,Novel05114
GO:0006888	endoplasmic reticulum to Golgi vesicle-mediated transport	biological_process	0.19925	1	10	2861	60	24160	gene-KI387_003034,gene-KI387_000035,Novel05114,Novel06749,gene-KI387_020721,gene-KI387_029452,Novel03486,gene-KI387_025078,gene-KI387_000561,gene-KI387_020360
GO:0016998	cell wall macromolecule catabolic process	biological_process	0.19968	1	6	2861	39	24160	gene-KI387_014524,gene-KI387_042546,gene-KI387_019179,gene-KI387_014523,gene-KI387_014522,gene-KI387_020640
GO:0019318	hexose metabolic process	biological_process	0.19986	1	13	2861	78	24160	gene-KI387_032582,Novel06979,gene-KI387_032579,gene-KI387_016264,Novel04482,gene-KI387_032581,gene-KI387_027932,gene-KI387_027917,gene-KI387_007279,gene-KI387_002376,gene-KI387_022335,Novel02291,gene-KI387_038659
GO:0042030	ATPase inhibitor activity	molecular_function	0.20017	1	3	2861	15	24160	gene-KI387_039451,gene-KI387_039683,Novel03286
GO:0008544	epidermis development	biological_process	0.20032	1	2	2861	8	24160	Novel01910,gene-KI387_039488
GO:0051171	regulation of nitrogen compound metabolic process	biological_process	0.20081	1	250	2861	1864	24160	gene-KI387_029517,gene-KI387_028836,gene-KI387_014523,gene-KI387_010555,gene-KI387_039738,gene-KI387_026378,Novel05197,Novel06573,Novel00067,gene-KI387_033155,gene-KI387_023468,gene-KI387_034125,Novel04360,gene-KI387_033897,gene-KI387_002376,gene-KI387_032300,gene-KI387_005698,gene-KI387_022919,gene-KI387_022915,gene-KI387_038702,gene-KI387_005567,gene-KI387_034161,gene-KI387_002318,gene-KI387_01…
GO:1901615	organic hydroxy compound metabolic process	biological_process	0.2013	1	9	2861	59	24160	Novel03847,gene-KI387_005875,gene-KI387_007364,Novel05221,gene-KI387_004989,gene-KI387_016358,gene-KI387_001322,gene-KI387_028163,gene-KI387_002644
GO:0016042	lipid catabolic process	biological_process	0.20146	1	9	2861	51	24160	gene-KI387_004989,gene-KI387_022759,Novel03194,gene-KI387_037443,Novel04287,gene-KI387_027826,gene-KI387_023418,gene-KI387_022937,gene-KI387_023931
GO:0042995	cell projection	cellular_component	0.20158	1	16	2861	101	24160	gene-KI387_009420,gene-KI387_034738,gene-KI387_019866,gene-KI387_034676,gene-KI387_000228,gene-KI387_026497,Novel06367,gene-KI387_020056,gene-KI387_030434,gene-KI387_037720,gene-KI387_033776,gene-KI387_025607,gene-KI387_025961,Novel02515,Novel02313,gene-KI387_032237
GO:0048522	positive regulation of cellular process	biological_process	0.20201	1	22	2861	145	24160	gene-KI387_041113,Novel02351,Novel03665,Novel00067,Novel06186,Novel01404,Novel04010,Novel07208,gene-KI387_024888,Novel03044,Novel07598,gene-KI387_032037,Novel00919,gene-KI387_025940,Novel02565,Novel06145,Novel03286,gene-KI387_034125,gene-KI387_037293,gene-KI387_037852,gene-KI387_023573,gene-KI387_033210
GO:0034703	cation channel complex	cellular_component	0.20235	1	4	2861	18	24160	Novel02515,gene-KI387_019115,Novel06197,gene-KI387_023507
GO:0004356	glutamate-ammonia ligase activity	molecular_function	0.20265	1	3	2861	13	24160	gene-KI387_002455,gene-KI387_015469,gene-KI387_033126
GO:0008017	microtubule binding	molecular_function	0.2027	1	24	2861	155	24160	gene-KI387_030500,gene-KI387_023454,gene-KI387_002081,gene-KI387_006743,gene-KI387_002375,Novel02825,gene-KI387_006735,gene-KI387_015068,gene-KI387_037852,gene-KI387_023866,Novel06199,gene-KI387_036167,gene-KI387_006299,gene-KI387_021462,gene-KI387_039261,gene-KI387_025960,gene-KI387_011090,gene-KI387_020535,gene-KI387_000870,Novel02794,gene-KI387_016802,gene-KI387_003117,gene-KI387_024634,gene-K…
GO:1901362	organic cyclic compound biosynthetic process	biological_process	0.20292	1	320	2861	2507	24160	gene-KI387_007190,gene-KI387_002988,gene-KI387_020416,gene-KI387_033495,gene-KI387_033192,gene-KI387_001502,Novel06979,gene-KI387_005203,Novel00503,gene-KI387_026122,Novel01457,gene-KI387_002547,gene-KI387_038993,gene-KI387_021515,Novel07508,gene-KI387_037293,gene-KI387_035222,gene-KI387_017765,Novel06980,gene-KI387_035886,gene-KI387_028432,gene-KI387_014541,gene-KI387_012843,gene-KI387_012076,ge…
GO:0005759	mitochondrial matrix	cellular_component	0.20369	1	4	2861	20	24160	Novel05240,gene-KI387_025751,gene-KI387_012321,gene-KI387_033296
GO:0043242	negative regulation of protein-containing complex disassembly	biological_process	0.20375	1	3	2861	13	24160	gene-KI387_026648,gene-KI387_018108,gene-KI387_015278
GO:0097588	archaeal or bacterial-type flagellum-dependent cell motility	biological_process	0.20442	1	5	2861	28	24160	gene-KI387_032237,Novel06367,gene-KI387_037720,gene-KI387_033671,gene-KI387_033776
GO:0034755	iron ion transmembrane transport	biological_process	0.20631	1	2	2861	6	24160	Novel07197,gene-KI387_037724
GO:0016070	RNA metabolic process	biological_process	0.2064	1	340	2861	2640	24160	gene-KI387_034125,gene-KI387_017757,gene-KI387_022915,gene-KI387_026885,gene-KI387_002376,gene-KI387_004535,gene-KI387_038702,gene-KI387_003569,gene-KI387_034161,gene-KI387_017606,gene-KI387_036414,gene-KI387_010555,gene-KI387_025069,gene-KI387_039738,Novel02662,gene-KI387_032225,Novel06573,gene-KI387_023468,gene-KI387_033155,Novel02313,Novel00067,Novel01846,gene-KI387_012871,gene-KI387_013082,ge…
GO:0005727	extrachromosomal circular DNA	cellular_component	0.20684	1	1	2861	2	24160	gene-KI387_008966
GO:0046821	extrachromosomal DNA	cellular_component	0.20684	1	1	2861	2	24160	gene-KI387_008966
GO:0043244	regulation of protein-containing complex disassembly	biological_process	0.2072	1	4	2861	20	24160	gene-KI387_015278,gene-KI387_026648,gene-KI387_018108,gene-KI387_024587
GO:0000155	phosphorelay sensor kinase activity	molecular_function	0.20773	1	10	2861	52	24160	gene-KI387_020090,gene-KI387_020237,gene-KI387_024078,gene-KI387_025123,gene-KI387_015215,gene-KI387_025096,gene-KI387_021665,gene-KI387_029371,gene-KI387_035734,gene-KI387_017807
GO:0140299	small molecule sensor activity	molecular_function	0.20773	1	10	2861	52	24160	gene-KI387_020090,gene-KI387_024078,gene-KI387_020237,gene-KI387_025123,gene-KI387_029371,gene-KI387_015215,gene-KI387_021665,gene-KI387_025096,gene-KI387_035734,gene-KI387_017807
GO:0016855	racemase and epimerase activity, acting on amino acids and derivatives	molecular_function	0.20783	1	2	2861	8	24160	gene-KI387_022325,Novel06147
GO:0036361	racemase activity, acting on amino acids and derivatives	molecular_function	0.20783	1	2	2861	8	24160	gene-KI387_022325,Novel06147
GO:0005891	voltage-gated calcium channel complex	cellular_component	0.20786	1	3	2861	11	24160	Novel02515,gene-KI387_019115,gene-KI387_023507
GO:0006553	lysine metabolic process	biological_process	0.20962	1	6	2861	38	24160	Novel04517,Novel04058,Novel06147,gene-KI387_010648,gene-KI387_040659,gene-KI387_026926
GO:0005577	fibrinogen complex	cellular_component	0.20975	1	7	2861	43	24160	gene-KI387_003620,gene-KI387_005255,gene-KI387_011870,gene-KI387_025953,gene-KI387_013415,gene-KI387_006020,gene-KI387_015120
GO:0030168	platelet activation	biological_process	0.20975	1	7	2861	43	24160	gene-KI387_025953,gene-KI387_015120,gene-KI387_006020,gene-KI387_013415,gene-KI387_003620,gene-KI387_011870,gene-KI387_005255
GO:0009439	cyanate metabolic process	biological_process	0.20986	1	1	2861	2	24160	Novel06671
GO:0080090	regulation of primary metabolic process	biological_process	0.21123	1	251	2861	1874	24160	gene-KI387_009389,gene-KI387_010241,gene-KI387_010359,gene-KI387_035201,gene-KI387_006085,gene-KI387_032288,Novel01029,gene-KI387_036740,gene-KI387_039405,gene-KI387_012487,gene-KI387_008144,gene-KI387_020169,gene-KI387_016788,gene-KI387_026070,gene-KI387_031655,gene-KI387_001385,gene-KI387_027035,gene-KI387_010836,Novel00691,gene-KI387_028107,gene-KI387_042546,gene-KI387_017640,gene-KI387_013946…
GO:0031640	killing of cells of other organism	biological_process	0.21126	1	4	2861	20	24160	gene-KI387_010228,gene-KI387_027591,gene-KI387_032037,Novel03286
GO:0051883	killing of cells in other organism involved in symbiotic interaction	biological_process	0.21126	1	4	2861	20	24160	gene-KI387_032037,gene-KI387_027591,gene-KI387_010228,Novel03286
GO:0005732	small nucleolar ribonucleoprotein complex	cellular_component	0.21256	1	2	2861	9	24160	Novel07508,gene-KI387_005724
GO:0034457	Mpp10 complex	cellular_component	0.21256	1	2	2861	9	24160	Novel07508,gene-KI387_005724
GO:0045122	aflatoxin biosynthetic process	biological_process	0.21263	1	1	2861	2	24160	gene-KI387_006085
GO:0046222	aflatoxin metabolic process	biological_process	0.21263	1	1	2861	2	24160	gene-KI387_006085
GO:1901376	organic heteropentacyclic compound metabolic process	biological_process	0.21263	1	1	2861	2	24160	gene-KI387_006085
GO:1901378	organic heteropentacyclic compound biosynthetic process	biological_process	0.21263	1	1	2861	2	24160	gene-KI387_006085
GO:0016462	pyrophosphatase activity	molecular_function	0.21285	1	175	2861	1216	24160	gene-KI387_025096,gene-KI387_001835,gene-KI387_020169,gene-KI387_034972,gene-KI387_008188,gene-KI387_033190,gene-KI387_001618,gene-KI387_020571,gene-KI387_013526,gene-KI387_031655,gene-KI387_024139,gene-KI387_031942,gene-KI387_020237,gene-KI387_027199,gene-KI387_000049,gene-KI387_032906,gene-KI387_015142,gene-KI387_037910,gene-KI387_003205,Novel03542,gene-KI387_016272,Novel01204,gene-KI387_027955…
GO:0005173	stem cell factor receptor binding	molecular_function	0.21291	1	1	2861	2	24160	gene-KI387_008575
GO:1990234	transferase complex	cellular_component	0.21343	1	54	2861	384	24160	Novel06441,gene-KI387_019220,gene-KI387_005741,gene-KI387_025103,Novel01908,gene-KI387_025266,Novel01143,Novel04534,gene-KI387_019710,gene-KI387_017256,Novel04705,gene-KI387_018611,gene-KI387_005247,gene-KI387_035130,gene-KI387_013319,gene-KI387_031529,Novel04701,Novel06748,Novel04378,Novel02679,Novel01498,gene-KI387_029503,gene-KI387_022996,gene-KI387_030371,Novel04773,Novel07453,Novel02886,Nove…
GO:0008915	lipid-A-disaccharide synthase activity	molecular_function	0.21367	1	3	2861	13	24160	gene-KI387_019517,gene-KI387_012562,gene-KI387_012559
GO:0044782	cilium organization	biological_process	0.21487	1	3	2861	12	24160	Novel02313,gene-KI387_019866,gene-KI387_025607
GO:0007219	Notch signaling pathway	biological_process	0.21504	1	5	2861	25	24160	gene-KI387_012666,gene-KI387_022303,Novel02652,gene-KI387_037852,gene-KI387_021300
GO:0030894	replisome	cellular_component	0.21598	1	2	2861	10	24160	gene-KI387_003117,gene-KI387_031655
GO:0043596	nuclear replication fork	cellular_component	0.21598	1	2	2861	10	24160	gene-KI387_003117,gene-KI387_031655
GO:0043601	nuclear replisome	cellular_component	0.21598	1	2	2861	10	24160	gene-KI387_003117,gene-KI387_031655
GO:0043625	delta DNA polymerase complex	cellular_component	0.21598	1	2	2861	10	24160	gene-KI387_003117,gene-KI387_031655
GO:0030173	integral component of Golgi membrane	cellular_component	0.21624	1	3	2861	15	24160	gene-KI387_042546,gene-KI387_038813,Novel02505
GO:0031228	intrinsic component of Golgi membrane	cellular_component	0.21624	1	3	2861	15	24160	gene-KI387_042546,gene-KI387_038813,Novel02505
GO:0005127	ciliary neurotrophic factor receptor binding	molecular_function	0.21641	1	1	2861	2	24160	gene-KI387_022918
GO:0019221	cytokine-mediated signaling pathway	biological_process	0.21641	1	1	2861	2	24160	gene-KI387_022918
GO:0034097	response to cytokine	biological_process	0.21641	1	1	2861	2	24160	gene-KI387_022918
GO:0043523	regulation of neuron apoptotic process	biological_process	0.21641	1	1	2861	2	24160	gene-KI387_022918
GO:0043524	negative regulation of neuron apoptotic process	biological_process	0.21641	1	1	2861	2	24160	gene-KI387_022918
GO:0051402	neuron apoptotic process	biological_process	0.21641	1	1	2861	2	24160	gene-KI387_022918
GO:0070120	ciliary neurotrophic factor-mediated signaling pathway	biological_process	0.21641	1	1	2861	2	24160	gene-KI387_022918
GO:0070997	neuron death	biological_process	0.21641	1	1	2861	2	24160	gene-KI387_022918
GO:0071345	cellular response to cytokine stimulus	biological_process	0.21641	1	1	2861	2	24160	gene-KI387_022918
GO:1901214	regulation of neuron death	biological_process	0.21641	1	1	2861	2	24160	gene-KI387_022918
GO:1901215	negative regulation of neuron death	biological_process	0.21641	1	1	2861	2	24160	gene-KI387_022918
GO:0071900	regulation of protein serine/threonine kinase activity	biological_process	0.21744	1	4	2861	20	24160	Novel00381,gene-KI387_003844,gene-KI387_035175,gene-KI387_017703
GO:0043565	sequence-specific DNA binding	molecular_function	0.21763	1	29	2861	214	24160	Novel02499,gene-KI387_013224,Novel06573,gene-KI387_039738,gene-KI387_024161,gene-KI387_032288,Novel06837,gene-KI387_035556,gene-KI387_014643,gene-KI387_033682,gene-KI387_009136,gene-KI387_009618,gene-KI387_028604,gene-KI387_035478,gene-KI387_001747,gene-KI387_035603,gene-KI387_015140,gene-KI387_025476,gene-KI387_017455,Novel00691,gene-KI387_032300,gene-KI387_004945,gene-KI387_031421,gene-KI387_01…
GO:0072511	divalent inorganic cation transport	biological_process	0.21783	1	9	2861	55	24160	gene-KI387_025376,gene-KI387_023507,gene-KI387_039683,gene-KI387_037459,gene-KI387_003748,gene-KI387_029421,Novel06197,gene-KI387_039451,gene-KI387_014558
GO:0004392	heme oxygenase (decyclizing) activity	molecular_function	0.21845	1	1	2861	2	24160	gene-KI387_017117
GO:0006788	heme oxidation	biological_process	0.21845	1	1	2861	2	24160	gene-KI387_017117
GO:0019222	regulation of metabolic process	biological_process	0.21876	1	267	2861	1998	24160	gene-KI387_021210,Novel02730,Novel04019,gene-KI387_019594,Novel00504,gene-KI387_012166,Novel04166,gene-KI387_032302,gene-KI387_000228,gene-KI387_031663,gene-KI387_026504,gene-KI387_034375,Novel06186,gene-KI387_026644,Novel02501,gene-KI387_006089,gene-KI387_012165,gene-KI387_035343,Novel02996,gene-KI387_035556,gene-KI387_028863,Novel04215,Novel03427,gene-KI387_012275,gene-KI387_012289,Novel00104,g…
GO:0004806	triglyceride lipase activity	molecular_function	0.22077	1	2	2861	7	24160	gene-KI387_034877,gene-KI387_032107
GO:0003689	DNA clamp loader activity	molecular_function	0.22095	1	1	2861	2	24160	gene-KI387_013319
GO:0005663	DNA replication factor C complex	cellular_component	0.22095	1	1	2861	2	24160	gene-KI387_013319
GO:0033170	protein-DNA loading ATPase activity	molecular_function	0.22095	1	1	2861	2	24160	gene-KI387_013319
GO:0008202	steroid metabolic process	biological_process	0.22107	1	22	2861	151	24160	gene-KI387_004989,gene-KI387_033216,gene-KI387_032834,gene-KI387_002547,gene-KI387_023272,gene-KI387_010078,gene-KI387_025701,gene-KI387_037183,gene-KI387_007081,gene-KI387_014542,gene-KI387_033213,gene-KI387_032987,gene-KI387_011493,gene-KI387_034132,gene-KI387_037191,Novel06465,gene-KI387_017999,gene-KI387_037143,Novel04058,Novel06451,gene-KI387_037704,Novel05714
GO:0001906	cell killing	biological_process	0.22183	1	4	2861	21	24160	gene-KI387_010228,gene-KI387_032037,gene-KI387_027591,Novel03286
GO:0006825	copper ion transport	biological_process	0.22451	1	2	2861	8	24160	gene-KI387_028945,gene-KI387_005969
GO:0007167	enzyme linked receptor protein signaling pathway	biological_process	0.22496	1	2	2861	6	24160	gene-KI387_010355,gene-KI387_030894
GO:0004879	nuclear receptor activity	molecular_function	0.22532	1	3	2861	12	24160	Novel04360,gene-KI387_027035,gene-KI387_020416
GO:0030518	intracellular steroid hormone receptor signaling pathway	biological_process	0.22532	1	3	2861	12	24160	Novel04360,gene-KI387_027035,gene-KI387_020416
GO:0030521	androgen receptor signaling pathway	biological_process	0.22532	1	3	2861	12	24160	gene-KI387_020416,Novel04360,gene-KI387_027035
GO:0030522	intracellular receptor signaling pathway	biological_process	0.22532	1	3	2861	12	24160	gene-KI387_027035,Novel04360,gene-KI387_020416
GO:0098531	ligand-activated transcription factor activity	molecular_function	0.22532	1	3	2861	12	24160	gene-KI387_027035,Novel04360,gene-KI387_020416
GO:0000245	spliceosomal complex assembly	biological_process	0.22566	1	3	2861	13	24160	gene-KI387_032225,gene-KI387_020214,gene-KI387_020237
GO:0005685	U1 snRNP	cellular_component	0.22566	1	3	2861	13	24160	gene-KI387_032225,gene-KI387_020237,gene-KI387_020214
GO:0006376	mRNA splice site selection	biological_process	0.22566	1	3	2861	13	24160	gene-KI387_032225,gene-KI387_020214,gene-KI387_020237
GO:0009891	positive regulation of biosynthetic process	biological_process	0.22793	1	10	2861	63	24160	Novel06186,Novel00067,Novel02565,Novel03665,gene-KI387_041113,gene-KI387_033210,gene-KI387_037852,gene-KI387_023573,gene-KI387_037293,gene-KI387_034125
GO:0010557	positive regulation of macromolecule biosynthetic process	biological_process	0.22793	1	10	2861	63	24160	gene-KI387_034125,gene-KI387_037293,gene-KI387_023573,gene-KI387_037852,gene-KI387_033210,gene-KI387_041113,Novel03665,Novel02565,Novel00067,Novel06186
GO:0031328	positive regulation of cellular biosynthetic process	biological_process	0.22793	1	10	2861	63	24160	Novel06186,Novel02565,Novel00067,Novel03665,gene-KI387_041113,gene-KI387_033210,gene-KI387_023573,gene-KI387_037852,gene-KI387_037293,gene-KI387_034125
GO:0008455	alpha-1,6-mannosylglycoprotein 2-beta-N-acetylglucosaminyltransferase activity	molecular_function	0.22862	1	1	2861	2	24160	gene-KI387_024368
GO:0033554	cellular response to stress	biological_process	0.23039	1	79	2861	545	24160	gene-KI387_028904,gene-KI387_006086,gene-KI387_031285,gene-KI387_016269,gene-KI387_032563,gene-KI387_021462,gene-KI387_016654,gene-KI387_023727,gene-KI387_028329,gene-KI387_001302,gene-KI387_003034,gene-KI387_015919,gene-KI387_032657,gene-KI387_016272,Novel03542,Novel05994,Novel01399,gene-KI387_027955,Novel06718,Novel01181,Novel01416,gene-KI387_029746,gene-KI387_027956,gene-KI387_005616,gene-KI38…
GO:0005544	calcium-dependent phospholipid binding	molecular_function	0.23104	1	3	2861	12	24160	gene-KI387_031267,gene-KI387_016140,gene-KI387_039405
GO:0010629	negative regulation of gene expression	biological_process	0.23255	1	19	2861	119	24160	Novel02501,gene-KI387_008144,gene-KI387_037910,Novel00083,gene-KI387_010359,gene-KI387_022908,Novel06149,Novel04215,Novel00180,Novel02565,gene-KI387_022303,gene-KI387_019276,Novel00556,Novel04351,gene-KI387_003795,gene-KI387_024848,Novel02084,gene-KI387_030903,gene-KI387_022929
GO:0005246	calcium channel regulator activity	molecular_function	0.23283	1	3	2861	14	24160	gene-KI387_039683,gene-KI387_039451,gene-KI387_038076
GO:0005507	copper ion binding	molecular_function	0.23335	1	21	2861	133	24160	gene-KI387_026287,gene-KI387_012548,gene-KI387_032096,gene-KI387_012544,Novel01170,gene-KI387_026441,gene-KI387_023721,gene-KI387_031952,gene-KI387_014787,gene-KI387_010946,gene-KI387_000778,gene-KI387_011381,gene-KI387_021530,gene-KI387_010945,gene-KI387_010555,gene-KI387_021538,gene-KI387_005969,gene-KI387_019055,gene-KI387_038504,gene-KI387_018359,gene-KI387_025136
GO:0036094	small molecule binding	molecular_function	0.23359	1	540	2861	3867	24160	gene-KI387_032838,gene-KI387_002650,Novel03019,Novel06443,gene-KI387_029109,gene-KI387_032778,gene-KI387_038993,gene-KI387_002324,gene-KI387_000778,Novel06724,gene-KI387_022018,Novel06979,gene-KI387_021013,gene-KI387_035194,Novel00200,gene-KI387_031884,gene-KI387_028659,gene-KI387_025622,gene-KI387_036938,gene-KI387_008525,gene-KI387_028904,gene-KI387_035195,gene-KI387_036167,Novel03045,gene-KI38…
GO:0006839	mitochondrial transport	biological_process	0.23389	1	6	2861	35	24160	Novel04001,Novel06197,gene-KI387_022317,gene-KI387_002463,gene-KI387_015775,gene-KI387_039966
GO:0032879	regulation of localization	biological_process	0.23421	1	11	2861	69	24160	gene-KI387_015750,Novel00713,Novel00908,Novel07095,gene-KI387_033088,Novel03194,Novel02508,gene-KI387_014325,Novel06919,gene-KI387_027826,gene-KI387_022324
GO:0050790	regulation of catalytic activity	biological_process	0.23572	1	16	2861	114	24160	Novel05969,gene-KI387_031655,gene-KI387_035175,gene-KI387_022919,Novel02371,gene-KI387_017703,gene-KI387_019276,Novel03286,gene-KI387_013606,gene-KI387_003844,gene-KI387_031700,Novel03833,Novel05197,gene-KI387_038504,gene-KI387_017389,Novel00381
GO:0065009	regulation of molecular function	biological_process	0.23572	1	16	2861	114	24160	gene-KI387_003844,gene-KI387_031700,Novel00381,Novel03833,Novel05197,gene-KI387_038504,gene-KI387_017389,gene-KI387_022919,Novel02371,Novel05969,gene-KI387_031655,gene-KI387_035175,Novel03286,gene-KI387_013606,gene-KI387_017703,gene-KI387_019276
GO:0018822	nitrile hydratase activity	molecular_function	0.23594	1	1	2861	2	24160	Novel00316
GO:0005892	acetylcholine-gated channel complex	cellular_component	0.23639	1	1	2861	2	24160	gene-KI387_029517
GO:0043235	receptor complex	cellular_component	0.23639	1	1	2861	2	24160	gene-KI387_029517
GO:0098802	plasma membrane signaling receptor complex	cellular_component	0.23639	1	1	2861	2	24160	gene-KI387_029517
GO:0033108	mitochondrial respiratory chain complex assembly	biological_process	0.23671	1	6	2861	36	24160	gene-KI387_020739,gene-KI387_037721,gene-KI387_007444,gene-KI387_011900,gene-KI387_026398,Novel03150
GO:0000045	autophagosome assembly	biological_process	0.23682	1	2	2861	10	24160	gene-KI387_009794,gene-KI387_005905
GO:0016236	macroautophagy	biological_process	0.23682	1	2	2861	10	24160	gene-KI387_005905,gene-KI387_009794
GO:1905037	autophagosome organization	biological_process	0.23682	1	2	2861	10	24160	gene-KI387_005905,gene-KI387_009794
GO:0051049	regulation of transport	biological_process	0.23712	1	8	2861	48	24160	gene-KI387_027826,Novel06919,gene-KI387_022324,Novel03194,Novel02508,gene-KI387_014325,Novel00713,Novel07095
GO:0032780	negative regulation of ATPase activity	biological_process	0.23807	1	2	2861	10	24160	gene-KI387_013606,Novel03286
GO:0043462	regulation of ATPase activity	biological_process	0.23807	1	2	2861	10	24160	Novel03286,gene-KI387_013606
GO:0034257	nicotinamide riboside transmembrane transporter activity	molecular_function	0.23861	1	1	2861	2	24160	Novel04773
GO:0034258	nicotinamide riboside transport	biological_process	0.23861	1	1	2861	2	24160	Novel04773
GO:0016211	ammonia ligase activity	molecular_function	0.23886	1	3	2861	14	24160	gene-KI387_002455,gene-KI387_015469,gene-KI387_033126
GO:0016880	acid-ammonia (or amide) ligase activity	molecular_function	0.23886	1	3	2861	14	24160	gene-KI387_002455,gene-KI387_015469,gene-KI387_033126
GO:0050840	extracellular matrix binding	molecular_function	0.23917	1	2	2861	8	24160	Novel00199,Novel02448
GO:0033897	ribonuclease T2 activity	molecular_function	0.23942	1	2	2861	8	24160	gene-KI387_034526,gene-KI387_034521
GO:0001883	purine nucleoside binding	molecular_function	0.23946	1	84	2861	586	24160	gene-KI387_006229,Novel02114,gene-KI387_033312,gene-KI387_033305,gene-KI387_032125,gene-KI387_022888,Novel02800,gene-KI387_001108,Novel01893,gene-KI387_038659,gene-KI387_035637,gene-KI387_004583,gene-KI387_035697,gene-KI387_011451,gene-KI387_042849,gene-KI387_032739,gene-KI387_030748,gene-KI387_041370,gene-KI387_008045,gene-KI387_032938,gene-KI387_002510,gene-KI387_033369,gene-KI387_034145,gene-K…
GO:0005525	GTP binding	molecular_function	0.23946	1	84	2861	586	24160	gene-KI387_019050,gene-KI387_002528,gene-KI387_002012,gene-KI387_023573,gene-KI387_027932,Novel06117,gene-KI387_014578,gene-KI387_012064,gene-KI387_017481,Novel05050,Novel00601,gene-KI387_015115,gene-KI387_012915,gene-KI387_031524,Novel04200,gene-KI387_021115,gene-KI387_037459,gene-KI387_027910,gene-KI387_033085,gene-KI387_039204,gene-KI387_027917,gene-KI387_003803,Novel03044,gene-KI387_002615,ge…
GO:0032549	ribonucleoside binding	molecular_function	0.23946	1	84	2861	586	24160	gene-KI387_020169,gene-KI387_024964,gene-KI387_007279,gene-KI387_033192,gene-KI387_001835,Novel06979,gene-KI387_021013,gene-KI387_013955,gene-KI387_000049,gene-KI387_002324,gene-KI387_038993,gene-KI387_031301,gene-KI387_031655,gene-KI387_005548,gene-KI387_005512,Novel06119,gene-KI387_027956,gene-KI387_029746,gene-KI387_037059,gene-KI387_024556,gene-KI387_015919,gene-KI387_016272,gene-KI387_003205…
GO:0032550	purine ribonucleoside binding	molecular_function	0.23946	1	84	2861	586	24160	gene-KI387_015919,gene-KI387_003205,gene-KI387_016272,Novel01204,gene-KI387_027955,Novel06119,gene-KI387_005548,gene-KI387_005512,gene-KI387_029746,gene-KI387_027956,gene-KI387_024556,gene-KI387_037059,gene-KI387_010126,gene-KI387_037852,gene-KI387_015116,gene-KI387_016269,gene-KI387_021462,gene-KI387_032563,gene-KI387_003766,gene-KI387_007383,gene-KI387_028329,gene-KI387_024964,gene-KI387_007279…
GO:0010942	positive regulation of cell death	biological_process	0.23955	1	2	2861	8	24160	Novel02351,Novel01404
GO:0043065	positive regulation of apoptotic process	biological_process	0.23955	1	2	2861	8	24160	Novel01404,Novel02351
GO:0043068	positive regulation of programmed cell death	biological_process	0.23955	1	2	2861	8	24160	Novel02351,Novel01404
GO:0000339	RNA cap binding	molecular_function	0.23963	1	1	2861	2	24160	gene-KI387_037059
GO:0000340	RNA 7-methylguanosine cap binding	molecular_function	0.23963	1	1	2861	2	24160	gene-KI387_037059
GO:0003796	lysozyme activity	molecular_function	0.23973	1	1	2861	2	24160	gene-KI387_020640
GO:0004842	ubiquitin-protein transferase activity	molecular_function	0.2399	1	46	2861	303	24160	Novel01051,Novel06748,Novel04701,Novel04534,gene-KI387_037187,gene-KI387_021144,gene-KI387_017256,gene-KI387_019710,gene-KI387_018611,Novel04705,gene-KI387_024477,Novel01908,Novel01143,gene-KI387_025266,gene-KI387_019220,gene-KI387_005741,Novel04773,Novel07453,gene-KI387_029503,gene-KI387_014886,Novel04378,Novel01498,Novel02679,gene-KI387_002203,gene-KI387_014603,gene-KI387_028879,gene-KI387_0295…
GO:0019787	ubiquitin-like protein transferase activity	molecular_function	0.2399	1	46	2861	303	24160	gene-KI387_023539,gene-KI387_023887,gene-KI387_013801,gene-KI387_016762,Novel04717,Novel02288,Novel04102,gene-KI387_032740,gene-KI387_005045,Novel07179,gene-KI387_022918,Novel01179,gene-KI387_029540,Novel00925,gene-KI387_028879,gene-KI387_014603,Novel06969,gene-KI387_025359,gene-KI387_002957,gene-KI387_025348,gene-KI387_017676,Novel04713,Novel04773,Novel07453,gene-KI387_002203,Novel04378,gene-KI3…
GO:0051262	protein tetramerization	biological_process	0.24063	1	2	2861	8	24160	gene-KI387_015574,Novel06909
GO:0007010	cytoskeleton organization	biological_process	0.24071	1	23	2861	159	24160	gene-KI387_026648,Novel01067,gene-KI387_024004,gene-KI387_022303,Novel03887,gene-KI387_025940,gene-KI387_027035,Novel06439,gene-KI387_015456,gene-KI387_035952,Novel02441,gene-KI387_018108,Novel05638,Novel03044,Novel07208,gene-KI387_032121,gene-KI387_000036,Novel03153,gene-KI387_002957,Novel04903,gene-KI387_008605,gene-KI387_015278,gene-KI387_024161
GO:0039526	modulation by virus of host apoptotic process	biological_process	0.24135	1	2	2861	8	24160	gene-KI387_032540,gene-KI387_002547
GO:0044531	modulation of programmed cell death in other organism	biological_process	0.24135	1	2	2861	8	24160	gene-KI387_002547,gene-KI387_032540
GO:0044532	modulation of apoptotic process in other organism	biological_process	0.24135	1	2	2861	8	24160	gene-KI387_032540,gene-KI387_002547
GO:0052040	modulation by symbiont of host programmed cell death	biological_process	0.24135	1	2	2861	8	24160	gene-KI387_032540,gene-KI387_002547
GO:0052150	modulation by symbiont of host apoptotic process	biological_process	0.24135	1	2	2861	8	24160	gene-KI387_032540,gene-KI387_002547
GO:0052248	modulation of programmed cell death in other organism involved in symbiotic interaction	biological_process	0.24135	1	2	2861	8	24160	gene-KI387_002547,gene-KI387_032540
GO:0052433	modulation by organism of apoptotic process in other organism involved in symbiotic interaction	biological_process	0.24135	1	2	2861	8	24160	gene-KI387_032540,gene-KI387_002547
GO:0000702	oxidized base lesion DNA N-glycosylase activity	molecular_function	0.24215	1	1	2861	3	24160	Novel06724
GO:0008534	oxidized purine nucleobase lesion DNA N-glycosylase activity	molecular_function	0.24215	1	1	2861	3	24160	Novel06724
GO:0003713	transcription coactivator activity	molecular_function	0.24322	1	4	2861	21	24160	Novel01591,Novel04286,gene-KI387_037852,gene-KI387_037293
GO:0048583	regulation of response to stimulus	biological_process	0.2438	1	21	2861	136	24160	gene-KI387_035995,gene-KI387_015382,gene-KI387_009420,gene-KI387_030894,gene-KI387_032563,gene-KI387_034676,gene-KI387_021515,Novel00919,gene-KI387_032037,gene-KI387_015386,gene-KI387_012362,Novel07019,gene-KI387_010611,gene-KI387_015378,gene-KI387_024888,Novel07208,Novel03173,gene-KI387_017389,Novel05856,gene-KI387_012566,Novel07020
GO:0010242	oxygen evolving activity	molecular_function	0.24418	1	1	2861	2	24160	gene-KI387_014403
GO:0002429	immune response-activating cell surface receptor signaling pathway	biological_process	0.24476	1	2	2861	6	24160	gene-KI387_035995,gene-KI387_032563
GO:0002757	immune response-activating signal transduction	biological_process	0.24476	1	2	2861	6	24160	gene-KI387_035995,gene-KI387_032563
GO:0002764	immune response-regulating signaling pathway	biological_process	0.24476	1	2	2861	6	24160	gene-KI387_035995,gene-KI387_032563
GO:0002768	immune response-regulating cell surface receptor signaling pathway	biological_process	0.24476	1	2	2861	6	24160	gene-KI387_032563,gene-KI387_035995
GO:0050851	antigen receptor-mediated signaling pathway	biological_process	0.24476	1	2	2861	6	24160	gene-KI387_035995,gene-KI387_032563
GO:0001882	nucleoside binding	molecular_function	0.24486	1	84	2861	587	24160	gene-KI387_015919,gene-KI387_016272,gene-KI387_003205,gene-KI387_027955,Novel01204,gene-KI387_005512,gene-KI387_005548,Novel06119,gene-KI387_029746,gene-KI387_027956,gene-KI387_037059,gene-KI387_024556,gene-KI387_010126,gene-KI387_015116,gene-KI387_037852,gene-KI387_016269,gene-KI387_032563,gene-KI387_021462,gene-KI387_028329,gene-KI387_003766,gene-KI387_007383,gene-KI387_024964,gene-KI387_007279…
GO:0022607	cellular component assembly	biological_process	0.24539	1	68	2861	568	24160	gene-KI387_035503,gene-KI387_015456,gene-KI387_025265,gene-KI387_014403,gene-KI387_031520,gene-KI387_034765,gene-KI387_025940,gene-KI387_020237,Novel07508,gene-KI387_037906,gene-KI387_023418,Novel03150,gene-KI387_002957,gene-KI387_006085,Novel06167,gene-KI387_000695,gene-KI387_017941,gene-KI387_030199,gene-KI387_037852,gene-KI387_014405,gene-KI387_043920,Novel06516,gene-KI387_011900,gene-KI387_03…
GO:0022008	neurogenesis	biological_process	0.24573	1	3	2861	15	24160	gene-KI387_013946,gene-KI387_026490,Novel03431
GO:0030182	neuron differentiation	biological_process	0.24573	1	3	2861	15	24160	gene-KI387_026490,gene-KI387_013946,Novel03431
GO:0031175	neuron projection development	biological_process	0.24573	1	3	2861	15	24160	gene-KI387_013946,gene-KI387_026490,Novel03431
GO:0048666	neuron development	biological_process	0.24573	1	3	2861	15	24160	Novel03431,gene-KI387_013946,gene-KI387_026490
GO:0048699	generation of neurons	biological_process	0.24573	1	3	2861	15	24160	gene-KI387_013946,gene-KI387_026490,Novel03431
GO:0060255	regulation of macromolecule metabolic process	biological_process	0.24581	1	262	2861	1970	24160	Novel03833,gene-KI387_007190,gene-KI387_005203,gene-KI387_000778,Novel00503,Novel06979,gene-KI387_033192,gene-KI387_020416,gene-KI387_003844,Novel07508,gene-KI387_038993,gene-KI387_021515,gene-KI387_026122,gene-KI387_037293,gene-KI387_035222,Novel02084,gene-KI387_014541,gene-KI387_035886,gene-KI387_017765,Novel06980,Novel03045,gene-KI387_016311,gene-KI387_012843,gene-KI387_002313,Novel00556,gene-…
GO:0006415	translational termination	biological_process	0.24582	1	4	2861	23	24160	Novel02165,gene-KI387_001044,gene-KI387_000492,gene-KI387_008262
GO:0019901	protein kinase binding	molecular_function	0.24746	1	6	2861	43	24160	gene-KI387_003844,gene-KI387_039905,Novel00381,gene-KI387_024161,gene-KI387_017703,gene-KI387_035175
GO:0070838	divalent metal ion transport	biological_process	0.24753	1	6	2861	36	24160	Novel06197,gene-KI387_039683,gene-KI387_039451,gene-KI387_023507,gene-KI387_025376,gene-KI387_003748
GO:0009055	electron transfer activity	molecular_function	0.24762	1	36	2861	287	24160	gene-KI387_004780,gene-KI387_031240,gene-KI387_005092,gene-KI387_038669,gene-KI387_001423,gene-KI387_026091,gene-KI387_018298,gene-KI387_015114,gene-KI387_018365,Novel06059,gene-KI387_004781,Novel03385,gene-KI387_012544,Novel01759,Novel02508,gene-KI387_004897,gene-KI387_012988,gene-KI387_023721,gene-KI387_004785,Novel04215,Novel06147,gene-KI387_004786,gene-KI387_018359,Novel06611,gene-KI387_03930…
GO:0009832	plant-type cell wall biogenesis	biological_process	0.24931	1	2	2861	7	24160	gene-KI387_030199,gene-KI387_031520
GO:0010215	cellulose microfibril organization	biological_process	0.24931	1	2	2861	7	24160	gene-KI387_030199,gene-KI387_031520
GO:0070726	cell wall assembly	biological_process	0.24931	1	2	2861	7	24160	gene-KI387_031520,gene-KI387_030199
GO:0071668	plant-type cell wall assembly	biological_process	0.24931	1	2	2861	7	24160	gene-KI387_030199,gene-KI387_031520
GO:0045026	plasma membrane fusion	biological_process	0.24976	1	2	2861	8	24160	Novel04768,Novel05041
GO:0036265	RNA (guanine-N7)-methylation	biological_process	0.25031	1	1	2861	2	24160	gene-KI387_038727
GO:0070475	rRNA base methylation	biological_process	0.25031	1	1	2861	2	24160	gene-KI387_038727
GO:0070476	rRNA (guanine-N7)-methylation	biological_process	0.25031	1	1	2861	2	24160	gene-KI387_038727
GO:0004869	cysteine-type endopeptidase inhibitor activity	molecular_function	0.25051	1	2	2861	12	24160	gene-KI387_012618,gene-KI387_005305
GO:0015075	ion transmembrane transporter activity	molecular_function	0.25076	1	107	2861	787	24160	gene-KI387_007107,Novel01258,gene-KI387_003748,Novel00827,gene-KI387_014886,gene-KI387_024903,gene-KI387_009072,gene-KI387_009892,Novel02292,gene-KI387_005247,gene-KI387_023507,gene-KI387_035815,gene-KI387_041763,gene-KI387_017418,gene-KI387_008306,gene-KI387_015725,gene-KI387_025940,Novel01457,gene-KI387_029421,Novel01759,gene-KI387_020140,gene-KI387_002037,gene-KI387_016322,gene-KI387_037067,ge…
GO:0042559	pteridine-containing compound biosynthetic process	biological_process	0.25077	1	2	2861	9	24160	gene-KI387_001322,Novel00583
GO:0006480	N-terminal protein amino acid methylation	biological_process	0.25168	1	3	2861	15	24160	gene-KI387_023727,gene-KI387_010848,gene-KI387_015766
GO:0030118	clathrin coat	cellular_component	0.25171	1	3	2861	14	24160	gene-KI387_013376,gene-KI387_006267,Novel06492
GO:0032561	guanyl ribonucleotide binding	molecular_function	0.25226	1	84	2861	589	24160	gene-KI387_041370,gene-KI387_008045,gene-KI387_032739,gene-KI387_030748,gene-KI387_042849,gene-KI387_024555,gene-KI387_021105,gene-KI387_002615,gene-KI387_038045,gene-KI387_002510,gene-KI387_032938,gene-KI387_033369,gene-KI387_034145,Novel02800,gene-KI387_032125,gene-KI387_033305,gene-KI387_001108,gene-KI387_022888,Novel01893,gene-KI387_033312,gene-KI387_006229,Novel02114,gene-KI387_011451,gene-K…
GO:0003779	actin binding	molecular_function	0.25273	1	18	2861	117	24160	gene-KI387_032300,gene-KI387_034738,gene-KI387_035952,gene-KI387_005255,Novel06439,gene-KI387_027035,Novel03887,gene-KI387_022303,gene-KI387_024004,Novel01067,gene-KI387_032121,Novel07208,Novel00503,Novel04903,Novel03153,gene-KI387_000036,gene-KI387_023507,gene-KI387_005159
GO:0045046	protein import into peroxisome membrane	biological_process	0.25315	1	1	2861	3	24160	gene-KI387_011378
GO:0018130	heterocycle biosynthetic process	biological_process	0.25318	1	297	2861	2346	24160	gene-KI387_035222,gene-KI387_037293,Novel01457,gene-KI387_026122,Novel07508,gene-KI387_038993,gene-KI387_021515,gene-KI387_020416,gene-KI387_033495,gene-KI387_002988,gene-KI387_005203,Novel00503,Novel06979,gene-KI387_033192,gene-KI387_001502,gene-KI387_007190,gene-KI387_025622,Novel00415,gene-KI387_028904,gene-KI387_028659,gene-KI387_008361,Novel00556,gene-KI387_002313,gene-KI387_017455,gene-KI38…
GO:0043545	molybdopterin cofactor metabolic process	biological_process	0.25348	1	7	2861	37	24160	gene-KI387_026644,gene-KI387_031407,gene-KI387_021462,Novel06979,gene-KI387_033192,Novel03125,gene-KI387_011451
GO:0004857	enzyme inhibitor activity	molecular_function	0.25385	1	23	2861	161	24160	Novel01143,gene-KI387_039451,gene-KI387_000422,Novel04152,Novel01742,gene-KI387_005704,gene-KI387_005305,gene-KI387_027955,Novel03833,gene-KI387_017389,gene-KI387_006743,gene-KI387_012618,gene-KI387_011802,gene-KI387_032023,Novel01962,Novel03286,gene-KI387_039683,Novel00031,gene-KI387_016067,Novel04864,Novel00004,Novel04537,Novel00176
GO:0008535	respiratory chain complex IV assembly	biological_process	0.25432	1	5	2861	27	24160	gene-KI387_020739,gene-KI387_037721,gene-KI387_011900,gene-KI387_007444,gene-KI387_026398
GO:0033617	mitochondrial cytochrome c oxidase assembly	biological_process	0.25432	1	5	2861	27	24160	gene-KI387_011900,gene-KI387_007444,gene-KI387_026398,gene-KI387_020739,gene-KI387_037721
GO:0033743	peptide-methionine (R)-S-oxide reductase activity	molecular_function	0.25472	1	1	2861	5	24160	gene-KI387_002385
GO:0006810	transport	biological_process	0.25505	1	381	2861	2931	24160	gene-KI387_025168,gene-KI387_009057,gene-KI387_032575,Novel04773,gene-KI387_010663,gene-KI387_017507,gene-KI387_006267,gene-KI387_001167,gene-KI387_017256,Novel02292,gene-KI387_005247,gene-KI387_019604,gene-KI387_023507,gene-KI387_005548,gene-KI387_038708,Novel02531,gene-KI387_016272,gene-KI387_017418,gene-KI387_005968,gene-KI387_025940,gene-KI387_003097,gene-KI387_031655,gene-KI387_022553,gene-K…
GO:0051234	establishment of localization	biological_process	0.25537	1	383	2861	2948	24160	gene-KI387_017507,gene-KI387_006267,gene-KI387_001167,gene-KI387_025168,gene-KI387_009057,gene-KI387_010663,gene-KI387_032575,Novel04773,gene-KI387_038708,Novel02531,gene-KI387_017418,gene-KI387_016272,gene-KI387_005968,gene-KI387_017256,gene-KI387_005548,gene-KI387_005247,Novel02292,gene-KI387_019604,gene-KI387_023507,gene-KI387_023574,gene-KI387_031655,gene-KI387_022553,gene-KI387_003316,Novel0…
GO:0004656	procollagen-proline 4-dioxygenase activity	molecular_function	0.25538	1	1	2861	3	24160	gene-KI387_039068
GO:0019798	procollagen-proline dioxygenase activity	molecular_function	0.25538	1	1	2861	3	24160	gene-KI387_039068
GO:0031543	peptidyl-proline dioxygenase activity	molecular_function	0.25538	1	1	2861	3	24160	gene-KI387_039068
GO:0031545	peptidyl-proline 4-dioxygenase activity	molecular_function	0.25538	1	1	2861	3	24160	gene-KI387_039068
GO:0009312	oligosaccharide biosynthetic process	biological_process	0.25567	1	12	2861	75	24160	gene-KI387_026381,gene-KI387_039361,gene-KI387_023610,gene-KI387_024368,gene-KI387_006791,gene-KI387_012562,Novel02995,gene-KI387_012559,Novel04174,gene-KI387_002763,gene-KI387_019517,gene-KI387_008045
GO:0009579	thylakoid	cellular_component	0.25599	1	24	2861	164	24160	gene-KI387_023127,gene-KI387_038076,gene-KI387_010208,gene-KI387_007063,gene-KI387_023678,Novel03139,Novel03004,gene-KI387_035223,gene-KI387_016931,gene-KI387_019327,Novel01207,gene-KI387_009529,gene-KI387_039857,Novel01759,gene-KI387_022438,gene-KI387_031000,gene-KI387_031170,Novel03427,gene-KI387_023721,gene-KI387_036372,Novel05585,gene-KI387_001503,gene-KI387_014403,gene-KI387_033419
GO:0008384	IkappaB kinase activity	molecular_function	0.25664	1	2	2861	6	24160	gene-KI387_008999,gene-KI387_036896
GO:0022843	voltage-gated cation channel activity	molecular_function	0.25695	1	3	2861	14	24160	gene-KI387_023507,gene-KI387_032296,Novel00827
GO:0042555	MCM complex	cellular_component	0.25787	1	1	2861	2	24160	gene-KI387_013606
GO:0051095	regulation of helicase activity	biological_process	0.25787	1	1	2861	2	24160	gene-KI387_013606
GO:0051097	negative regulation of helicase activity	biological_process	0.25787	1	1	2861	2	24160	gene-KI387_013606
GO:1905462	regulation of DNA duplex unwinding	biological_process	0.25787	1	1	2861	2	24160	gene-KI387_013606
GO:1905463	negative regulation of DNA duplex unwinding	biological_process	0.25787	1	1	2861	2	24160	gene-KI387_013606
GO:1905774	regulation of DNA helicase activity	biological_process	0.25787	1	1	2861	2	24160	gene-KI387_013606
GO:1905775	negative regulation of DNA helicase activity	biological_process	0.25787	1	1	2861	2	24160	gene-KI387_013606
GO:0016769	transferase activity, transferring nitrogenous groups	molecular_function	0.25918	1	3	2861	12	24160	gene-KI387_022294,Novel05221,gene-KI387_031955
GO:0005780	extrinsic component of intraperoxisomal membrane	cellular_component	0.2598	1	1	2861	2	24160	gene-KI387_006148
GO:0031312	extrinsic component of organelle membrane	cellular_component	0.2598	1	1	2861	2	24160	gene-KI387_006148
GO:0045033	peroxisome inheritance	biological_process	0.2598	1	1	2861	2	24160	gene-KI387_006148
GO:0005047	signal recognition particle binding	molecular_function	0.26059	1	2	2861	9	24160	gene-KI387_031655,gene-KI387_023573
GO:0009889	regulation of biosynthetic process	biological_process	0.26127	1	239	2861	1799	24160	gene-KI387_026070,gene-KI387_001385,gene-KI387_027035,gene-KI387_010836,gene-KI387_028107,Novel00691,gene-KI387_042546,gene-KI387_017640,gene-KI387_013946,gene-KI387_033210,gene-KI387_025476,Novel01759,gene-KI387_027350,gene-KI387_001644,gene-KI387_025940,gene-KI387_011095,gene-KI387_031942,gene-KI387_020237,gene-KI387_010241,gene-KI387_010359,gene-KI387_009389,gene-KI387_035201,gene-KI387_006085…
GO:0010556	regulation of macromolecule biosynthetic process	biological_process	0.26127	1	239	2861	1799	24160	gene-KI387_017640,Novel00691,gene-KI387_028107,gene-KI387_042546,gene-KI387_013946,gene-KI387_033210,gene-KI387_026070,gene-KI387_001385,gene-KI387_010836,gene-KI387_027035,gene-KI387_025940,gene-KI387_011095,gene-KI387_031942,gene-KI387_020237,gene-KI387_025476,Novel01759,gene-KI387_027350,gene-KI387_001644,gene-KI387_032288,gene-KI387_036740,Novel01029,gene-KI387_010241,gene-KI387_009389,gene-K…
GO:0031326	regulation of cellular biosynthetic process	biological_process	0.26127	1	239	2861	1799	24160	gene-KI387_039405,gene-KI387_008144,gene-KI387_020169,gene-KI387_012487,gene-KI387_016788,gene-KI387_010359,gene-KI387_010241,gene-KI387_009389,gene-KI387_035201,gene-KI387_006085,gene-KI387_032288,gene-KI387_036740,Novel01029,gene-KI387_025476,Novel01759,gene-KI387_027350,gene-KI387_001644,gene-KI387_025940,gene-KI387_031942,gene-KI387_020237,gene-KI387_011095,gene-KI387_026070,gene-KI387_001385…
GO:2000112	regulation of cellular macromolecule biosynthetic process	biological_process	0.26127	1	239	2861	1799	24160	gene-KI387_010836,gene-KI387_027035,gene-KI387_001385,gene-KI387_026070,gene-KI387_033210,gene-KI387_017640,Novel00691,gene-KI387_028107,gene-KI387_042546,gene-KI387_013946,gene-KI387_027350,gene-KI387_001644,gene-KI387_025476,Novel01759,gene-KI387_011095,gene-KI387_031942,gene-KI387_020237,gene-KI387_025940,gene-KI387_009389,gene-KI387_010241,gene-KI387_010359,gene-KI387_006085,gene-KI387_035201…
GO:0031965	nuclear membrane	cellular_component	0.2616	1	2	2861	11	24160	Novel03901,Novel04857
GO:0008409	5-3 exonuclease activity	molecular_function	0.2633	1	1	2861	3	24160	gene-KI387_026729
GO:0035312	5-3 exodeoxyribonuclease activity	molecular_function	0.2633	1	1	2861	3	24160	gene-KI387_026729
GO:0030198	extracellular matrix organization	biological_process	0.26444	1	2	2861	8	24160	gene-KI387_030199,gene-KI387_031520
GO:0043062	extracellular structure organization	biological_process	0.26444	1	2	2861	8	24160	gene-KI387_031520,gene-KI387_030199
GO:0071107	response to parathyroid hormone	biological_process	0.26462	1	2	2861	8	24160	gene-KI387_007101,Novel04215
GO:0000041	transition metal ion transport	biological_process	0.26585	1	9	2861	54	24160	gene-KI387_014558,gene-KI387_005969,gene-KI387_037724,gene-KI387_028945,Novel07197,gene-KI387_037459,gene-KI387_008890,gene-KI387_029421,gene-KI387_032382
GO:0003830	beta-1,4-mannosylglycoprotein 4-beta-N-acetylglucosaminyltransferase activity	molecular_function	0.26656	1	2	2861	7	24160	Novel01393,Novel06027
GO:0043066	negative regulation of apoptotic process	biological_process	0.26745	1	3	2861	14	24160	gene-KI387_032540,gene-KI387_002547,gene-KI387_022918
GO:0043069	negative regulation of programmed cell death	biological_process	0.26745	1	3	2861	14	24160	gene-KI387_022918,gene-KI387_032540,gene-KI387_002547
GO:0060548	negative regulation of cell death	biological_process	0.26745	1	3	2861	14	24160	gene-KI387_032540,gene-KI387_002547,gene-KI387_022918
GO:0004529	exodeoxyribonuclease activity	molecular_function	0.26766	1	12	2861	73	24160	gene-KI387_016802,gene-KI387_005814,gene-KI387_026959,gene-KI387_034994,gene-KI387_021000,gene-KI387_025960,gene-KI387_015456,gene-KI387_005255,gene-KI387_028107,gene-KI387_014886,gene-KI387_002882,gene-KI387_026729
GO:0016895	exodeoxyribonuclease activity, producing 5-phosphomonoesters	molecular_function	0.26766	1	12	2861	73	24160	gene-KI387_005814,gene-KI387_016802,gene-KI387_034994,gene-KI387_026959,gene-KI387_021000,gene-KI387_025960,gene-KI387_005255,gene-KI387_015456,gene-KI387_028107,gene-KI387_014886,gene-KI387_026729,gene-KI387_002882
GO:0000793	condensed chromosome	cellular_component	0.26776	1	15	2861	110	24160	gene-KI387_019655,gene-KI387_037640,gene-KI387_008992,gene-KI387_031285,gene-KI387_042546,gene-KI387_025626,gene-KI387_000696,Novel04146,gene-KI387_000228,gene-KI387_015120,gene-KI387_034863,gene-KI387_015500,gene-KI387_029868,gene-KI387_000695,gene-KI387_023468
GO:0045261	proton-transporting ATP synthase complex, catalytic core F(1)	cellular_component	0.26782	1	4	2861	20	24160	gene-KI387_024034,gene-KI387_012076,gene-KI387_025940,Novel01457
GO:0052689	carboxylic ester hydrolase activity	molecular_function	0.26817	1	17	2861	117	24160	gene-KI387_009490,gene-KI387_000422,gene-KI387_029394,gene-KI387_033828,gene-KI387_032107,gene-KI387_003828,Novel01742,gene-KI387_037977,gene-KI387_019587,gene-KI387_006254,gene-KI387_017753,gene-KI387_026504,Novel04287,gene-KI387_005848,gene-KI387_021407,gene-KI387_034877,Novel03194
GO:0003854	3-beta-hydroxy-delta5-steroid dehydrogenase activity	molecular_function	0.26861	1	20	2861	140	24160	gene-KI387_023272,gene-KI387_010078,gene-KI387_025701,gene-KI387_033216,gene-KI387_032834,gene-KI387_002547,gene-KI387_007081,gene-KI387_037183,gene-KI387_033213,gene-KI387_032987,gene-KI387_011493,Novel04058,gene-KI387_037704,Novel05714,Novel06451,gene-KI387_034132,gene-KI387_037191,Novel06465,gene-KI387_017999,gene-KI387_037143
GO:0016229	steroid dehydrogenase activity	molecular_function	0.26861	1	20	2861	140	24160	gene-KI387_033213,gene-KI387_032987,gene-KI387_011493,gene-KI387_034132,gene-KI387_037191,Novel06465,gene-KI387_017999,gene-KI387_037143,Novel04058,gene-KI387_037704,Novel06451,Novel05714,gene-KI387_032834,gene-KI387_033216,gene-KI387_002547,gene-KI387_023272,gene-KI387_025701,gene-KI387_010078,gene-KI387_037183,gene-KI387_007081
GO:0033764	steroid dehydrogenase activity, acting on the CH-OH group of donors, NAD or NADP as acceptor	molecular_function	0.26861	1	20	2861	140	24160	gene-KI387_037704,Novel06451,Novel05714,Novel04058,gene-KI387_037143,gene-KI387_017999,Novel06465,gene-KI387_034132,gene-KI387_037191,gene-KI387_011493,gene-KI387_032987,gene-KI387_033213,gene-KI387_007081,gene-KI387_037183,gene-KI387_025701,gene-KI387_010078,gene-KI387_023272,gene-KI387_002547,gene-KI387_033216,gene-KI387_032834
GO:0048518	positive regulation of biological process	biological_process	0.26914	1	25	2861	169	24160	gene-KI387_041113,Novel02351,Novel03665,Novel00067,Novel06186,Novel01404,Novel04010,gene-KI387_024888,Novel07208,Novel03044,Novel07598,gene-KI387_032037,Novel02989,Novel00919,gene-KI387_025940,gene-KI387_032563,Novel02565,Novel03286,Novel06145,gene-KI387_034125,gene-KI387_037293,gene-KI387_037852,gene-KI387_023573,gene-KI387_035995,gene-KI387_033210
GO:0005778	peroxisomal membrane	cellular_component	0.27049	1	3	2861	15	24160	gene-KI387_011378,gene-KI387_006148,Novel03446
GO:0031903	microbody membrane	cellular_component	0.27049	1	3	2861	15	24160	gene-KI387_011378,gene-KI387_006148,Novel03446
GO:0061640	cytoskeleton-dependent cytokinesis	biological_process	0.27056	1	2	2861	8	24160	gene-KI387_035631,Novel03340
GO:0003341	cilium movement	biological_process	0.27278	1	2	2861	8	24160	Novel00908,gene-KI387_025607
GO:1902533	positive regulation of intracellular signal transduction	biological_process	0.27307	1	4	2861	19	24160	Novel00919,Novel07208,gene-KI387_024888,gene-KI387_032037
GO:0016592	mediator complex	cellular_component	0.27355	1	14	2861	102	24160	Novel05975,gene-KI387_031002,gene-KI387_001644,Novel01989,gene-KI387_027350,gene-KI387_013224,gene-KI387_016802,gene-KI387_039405,Novel02269,gene-KI387_001323,gene-KI387_034988,gene-KI387_028107,gene-KI387_019594,gene-KI387_013082
GO:0032422	purine-rich negative regulatory element binding	molecular_function	0.27428	1	1	2861	2	24160	Novel02499
GO:0019438	aromatic compound biosynthetic process	biological_process	0.27431	1	291	2861	2308	24160	gene-KI387_006703,gene-KI387_021115,gene-KI387_010824,gene-KI387_014278,Novel06327,gene-KI387_001322,gene-KI387_009117,Novel04174,gene-KI387_024587,gene-KI387_034526,gene-KI387_021666,gene-KI387_014286,gene-KI387_029873,gene-KI387_001578,gene-KI387_027031,gene-KI387_012598,gene-KI387_026117,Novel06548,gene-KI387_022918,gene-KI387_032703,gene-KI387_039242,gene-KI387_035130,gene-KI387_022908,gene-K…
GO:0004888	transmembrane signaling receptor activity	molecular_function	0.2755	1	17	2861	104	24160	Novel05012,gene-KI387_015386,gene-KI387_035338,gene-KI387_033177,gene-KI387_031011,gene-KI387_041763,gene-KI387_029453,gene-KI387_022318,gene-KI387_035341,gene-KI387_021443,gene-KI387_018969,gene-KI387_015382,gene-KI387_030371,gene-KI387_000413,gene-KI387_019181,gene-KI387_034145,gene-KI387_010355
GO:0004721	phosphoprotein phosphatase activity	molecular_function	0.27557	1	8	2861	47	24160	gene-KI387_039710,Novel04010,gene-KI387_017807,Novel07598,gene-KI387_014494,gene-KI387_038993,Novel05014,gene-KI387_032563
GO:0008287	protein serine/threonine phosphatase complex	cellular_component	0.27596	1	5	2861	25	24160	gene-KI387_020471,gene-KI387_025662,Novel06145,Novel07508,gene-KI387_038128
GO:1903293	phosphatase complex	cellular_component	0.27596	1	5	2861	25	24160	Novel07508,gene-KI387_038128,gene-KI387_020471,gene-KI387_025662,Novel06145
GO:0006694	steroid biosynthetic process	biological_process	0.27655	1	21	2861	149	24160	gene-KI387_037183,gene-KI387_007081,gene-KI387_002547,gene-KI387_032834,gene-KI387_033216,gene-KI387_025701,gene-KI387_010078,gene-KI387_023272,gene-KI387_037143,gene-KI387_017999,Novel06465,gene-KI387_037191,gene-KI387_034132,Novel05714,gene-KI387_037704,Novel06451,Novel04058,gene-KI387_011493,gene-KI387_032987,gene-KI387_033213,gene-KI387_014542
GO:0071824	protein-DNA complex subunit organization	biological_process	0.27679	1	13	2861	95	24160	gene-KI387_029831,gene-KI387_024161,Novel04360,gene-KI387_043920,gene-KI387_032240,gene-KI387_003620,gene-KI387_031888,gene-KI387_019400,gene-KI387_010283,gene-KI387_039089,gene-KI387_021515,gene-KI387_037906,gene-KI387_022830
GO:0042493	response to drug	biological_process	0.27728	1	1	2861	3	24160	gene-KI387_006691
GO:0008703	5-amino-6-(5-phosphoribosylamino)uracil reductase activity	molecular_function	0.27848	1	1	2861	2	24160	gene-KI387_027874
GO:0048870	cell motility	biological_process	0.27892	1	12	2861	79	24160	Novel06367,gene-KI387_032237,gene-KI387_015750,gene-KI387_020056,gene-KI387_000228,gene-KI387_025607,gene-KI387_033776,gene-KI387_033088,gene-KI387_034738,gene-KI387_037720,gene-KI387_033671,gene-KI387_030434
GO:0051674	localization of cell	biological_process	0.27892	1	12	2861	79	24160	gene-KI387_033088,gene-KI387_025607,gene-KI387_000228,gene-KI387_033776,gene-KI387_015750,gene-KI387_020056,Novel06367,gene-KI387_032237,gene-KI387_030434,gene-KI387_033671,gene-KI387_037720,gene-KI387_034738
GO:0009664	plant-type cell wall organization	biological_process	0.28176	1	6	2861	36	24160	gene-KI387_031520,gene-KI387_043349,gene-KI387_030199,Novel03780,gene-KI387_019866,Novel03399
GO:0071669	plant-type cell wall organization or biogenesis	biological_process	0.28176	1	6	2861	36	24160	Novel03399,gene-KI387_019866,gene-KI387_031520,Novel03780,gene-KI387_030199,gene-KI387_043349
GO:0045893	positive regulation of transcription, DNA-templated	biological_process	0.28241	1	9	2861	59	24160	gene-KI387_037293,gene-KI387_034125,gene-KI387_033210,gene-KI387_023573,gene-KI387_037852,gene-KI387_041113,Novel06186,Novel02565,Novel00067
GO:0045935	positive regulation of nucleobase-containing compound metabolic process	biological_process	0.28241	1	9	2861	59	24160	gene-KI387_041113,Novel00067,Novel02565,Novel06186,gene-KI387_034125,gene-KI387_037293,gene-KI387_037852,gene-KI387_023573,gene-KI387_033210
GO:0051254	positive regulation of RNA metabolic process	biological_process	0.28241	1	9	2861	59	24160	Novel06186,Novel02565,Novel00067,gene-KI387_041113,gene-KI387_033210,gene-KI387_023573,gene-KI387_037852,gene-KI387_037293,gene-KI387_034125
GO:1902680	positive regulation of RNA biosynthetic process	biological_process	0.28241	1	9	2861	59	24160	gene-KI387_033210,gene-KI387_037852,gene-KI387_023573,gene-KI387_037293,gene-KI387_034125,Novel06186,Novel00067,Novel02565,gene-KI387_041113
GO:1903508	positive regulation of nucleic acid-templated transcription	biological_process	0.28241	1	9	2861	59	24160	gene-KI387_034125,gene-KI387_037293,gene-KI387_023573,gene-KI387_037852,gene-KI387_033210,gene-KI387_041113,Novel02565,Novel00067,Novel06186
GO:0019001	guanyl nucleotide binding	molecular_function	0.28297	1	84	2861	594	24160	gene-KI387_008045,gene-KI387_041370,gene-KI387_042849,gene-KI387_030748,gene-KI387_032739,gene-KI387_021105,gene-KI387_024555,gene-KI387_033369,gene-KI387_034145,gene-KI387_032938,gene-KI387_002510,gene-KI387_038045,gene-KI387_002615,Novel01893,gene-KI387_032125,gene-KI387_033305,Novel02800,gene-KI387_001108,gene-KI387_022888,Novel02114,gene-KI387_006229,gene-KI387_033312,gene-KI387_035697,gene-K…
GO:0018662	phenol 2-monooxygenase activity	molecular_function	0.28421	1	2	2861	10	24160	gene-KI387_039683,Novel03256
GO:0071806	protein transmembrane transport	biological_process	0.28428	1	6	2861	34	24160	gene-KI387_039966,gene-KI387_014042,gene-KI387_018291,gene-KI387_012544,gene-KI387_022317,gene-KI387_002463
GO:0009378	four-way junction helicase activity	molecular_function	0.28542	1	25	2861	150	24160	Novel03044,gene-KI387_003803,gene-KI387_027955,gene-KI387_031987,gene-KI387_015919,gene-KI387_016272,Novel03542,gene-KI387_035694,gene-KI387_021603,gene-KI387_015914,gene-KI387_020169,gene-KI387_013319,Novel01181,gene-KI387_029746,gene-KI387_027956,gene-KI387_016269,gene-KI387_001618,gene-KI387_028904,Novel04312,gene-KI387_032739,gene-KI387_028329,gene-KI387_035737,gene-KI387_019448,gene-KI387_03…
GO:0042873	aldonate transmembrane transport	biological_process	0.28599	1	1	2861	2	24160	gene-KI387_005704
GO:0042879	aldonate transmembrane transporter activity	molecular_function	0.28599	1	1	2861	2	24160	gene-KI387_005704
GO:0005262	calcium channel activity	molecular_function	0.28718	1	6	2861	39	24160	gene-KI387_033736,gene-KI387_033175,gene-KI387_036725,gene-KI387_023507,gene-KI387_005247,gene-KI387_025376
GO:0019898	extrinsic component of membrane	cellular_component	0.28802	1	4	2861	26	24160	gene-KI387_033419,gene-KI387_023678,gene-KI387_031000,gene-KI387_006148
GO:0006278	RNA-dependent DNA biosynthetic process	biological_process	0.28843	1	2	2861	7	24160	gene-KI387_020416,Novel05767
GO:0071897	DNA biosynthetic process	biological_process	0.28843	1	2	2861	7	24160	Novel05767,gene-KI387_020416
GO:0005886	plasma membrane	cellular_component	0.28846	1	38	2861	270	24160	gene-KI387_025103,gene-KI387_001044,gene-KI387_023507,gene-KI387_019034,gene-KI387_013376,gene-KI387_005804,gene-KI387_011451,gene-KI387_023071,Novel02515,gene-KI387_014886,gene-KI387_011453,gene-KI387_006267,gene-KI387_014251,gene-KI387_003186,gene-KI387_035155,gene-KI387_019747,gene-KI387_031285,gene-KI387_010355,gene-KI387_022330,gene-KI387_008890,gene-KI387_009338,Novel06791,gene-KI387_033085…
GO:0071555	cell wall organization	biological_process	0.28891	1	15	2861	99	24160	gene-KI387_005848,gene-KI387_006254,gene-KI387_030199,Novel03399,gene-KI387_031520,gene-KI387_037977,gene-KI387_003828,gene-KI387_043349,Novel01742,Novel03780,gene-KI387_026504,gene-KI387_019866,gene-KI387_009490,gene-KI387_000422,gene-KI387_029394
GO:0065004	protein-DNA complex assembly	biological_process	0.2893	1	11	2861	83	24160	gene-KI387_037906,gene-KI387_022830,gene-KI387_003620,gene-KI387_031888,gene-KI387_032240,gene-KI387_019400,gene-KI387_010283,Novel04360,gene-KI387_043920,gene-KI387_029831,gene-KI387_024161
GO:0006471	protein ADP-ribosylation	biological_process	0.28966	1	2	2861	7	24160	gene-KI387_010154,Novel07208
GO:0046417	chorismate metabolic process	biological_process	0.28978	1	1	2861	3	24160	gene-KI387_034132
GO:0003873	6-phosphofructo-2-kinase activity	molecular_function	0.28983	1	4	2861	24	24160	gene-KI387_007279,gene-KI387_027917,gene-KI387_038659,gene-KI387_027932
GO:0006000	fructose metabolic process	biological_process	0.28983	1	4	2861	24	24160	gene-KI387_038659,gene-KI387_027917,gene-KI387_007279,gene-KI387_027932
GO:0070402	NADPH binding	molecular_function	0.29177	1	1	2861	3	24160	gene-KI387_002164
GO:0008360	regulation of cell shape	biological_process	0.29224	1	1	2861	3	24160	gene-KI387_003620
GO:0022604	regulation of cell morphogenesis	biological_process	0.29224	1	1	2861	3	24160	gene-KI387_003620
GO:0019835	cytolysis	biological_process	0.293	1	7	2861	45	24160	gene-KI387_010228,gene-KI387_027591,gene-KI387_032037,gene-KI387_032349,gene-KI387_029014,gene-KI387_016202,gene-KI387_006774
GO:0005882	intermediate filament	cellular_component	0.29303	1	4	2861	26	24160	gene-KI387_029360,gene-KI387_041100,gene-KI387_029453,gene-KI387_015766
GO:0045111	intermediate filament cytoskeleton	cellular_component	0.29303	1	4	2861	26	24160	gene-KI387_029453,gene-KI387_041100,gene-KI387_015766,gene-KI387_029360
GO:0016073	snRNA metabolic process	biological_process	0.29323	1	1	2861	3	24160	gene-KI387_010266
GO:0016180	snRNA processing	biological_process	0.29323	1	1	2861	3	24160	gene-KI387_010266
GO:0034472	snRNA 3-end processing	biological_process	0.29323	1	1	2861	3	24160	gene-KI387_010266
GO:0034477	U6 snRNA 3-end processing	biological_process	0.29323	1	1	2861	3	24160	gene-KI387_010266
GO:0043628	ncRNA 3-end processing	biological_process	0.29323	1	1	2861	3	24160	gene-KI387_010266
GO:0042752	regulation of circadian rhythm	biological_process	0.29335	1	1	2861	2	24160	gene-KI387_008144
GO:0042754	negative regulation of circadian rhythm	biological_process	0.29335	1	1	2861	2	24160	gene-KI387_008144
GO:0015627	type II protein secretion system complex	cellular_component	0.29362	1	1	2861	3	24160	gene-KI387_014042
GO:0015628	protein secretion by the type II secretion system	biological_process	0.29362	1	1	2861	3	24160	gene-KI387_014042
GO:0098776	protein transport across the cell outer membrane	biological_process	0.29362	1	1	2861	3	24160	gene-KI387_014042
GO:0051189	prosthetic group metabolic process	biological_process	0.29375	1	7	2861	39	24160	gene-KI387_033192,Novel06979,Novel03125,gene-KI387_011451,gene-KI387_026644,gene-KI387_031407,gene-KI387_021462
GO:0003700	DNA-binding transcription factor activity	molecular_function	0.29472	1	74	2861	599	24160	Novel07077,gene-KI387_012166,gene-KI387_016311,gene-KI387_014541,gene-KI387_034376,gene-KI387_033567,gene-KI387_004945,Novel01680,gene-KI387_011802,gene-KI387_034375,gene-KI387_001148,gene-KI387_015337,gene-KI387_002313,gene-KI387_000228,gene-KI387_032302,gene-KI387_000483,gene-KI387_020416,gene-KI387_037399,gene-KI387_036740,Novel01029,Novel00503,gene-KI387_010241,gene-KI387_007190,gene-KI387_01…
GO:0004252	serine-type endopeptidase activity	molecular_function	0.29547	1	28	2861	189	24160	gene-KI387_026048,gene-KI387_000561,gene-KI387_008335,Novel06731,gene-KI387_029360,gene-KI387_010381,gene-KI387_039410,gene-KI387_037095,gene-KI387_007504,Novel01329,gene-KI387_004965,gene-KI387_028281,Novel06655,gene-KI387_041100,gene-KI387_022318,gene-KI387_014401,gene-KI387_028279,gene-KI387_029359,Novel02023,gene-KI387_016350,Novel07258,Novel02587,gene-KI387_024131,gene-KI387_029908,gene-KI38…
GO:0000150	recombinase activity	molecular_function	0.29566	1	2	2861	7	24160	Novel06611,gene-KI387_032740
GO:0050829	defense response to Gram-negative bacterium	biological_process	0.29605	1	2	2861	8	24160	gene-KI387_016202,Novel04958
GO:0051726	regulation of cell cycle	biological_process	0.2962	1	14	2861	99	24160	gene-KI387_016654,gene-KI387_017703,Novel04146,Novel00381,Novel04864,gene-KI387_011802,gene-KI387_031285,gene-KI387_032023,gene-KI387_035175,gene-KI387_037640,Novel04010,gene-KI387_003844,gene-KI387_013946,Novel07598
GO:0004860	protein kinase inhibitor activity	molecular_function	0.29671	1	3	2861	13	24160	gene-KI387_032023,gene-KI387_011802,Novel04864
GO:0019210	kinase inhibitor activity	molecular_function	0.29671	1	3	2861	13	24160	gene-KI387_032023,gene-KI387_011802,Novel04864
GO:0009092	homoserine metabolic process	biological_process	0.29738	1	4	2861	19	24160	gene-KI387_032838,gene-KI387_001477,gene-KI387_031955,Novel03215
GO:0019346	transsulfuration	biological_process	0.29738	1	4	2861	19	24160	gene-KI387_032838,Novel03215,gene-KI387_031955,gene-KI387_001477
GO:0050667	homocysteine metabolic process	biological_process	0.29738	1	4	2861	19	24160	gene-KI387_032838,Novel03215,gene-KI387_031955,gene-KI387_001477
GO:0019081	viral translation	biological_process	0.29795	1	1	2861	2	24160	gene-KI387_022929
GO:0039656	modulation by virus of host gene expression	biological_process	0.29795	1	1	2861	2	24160	gene-KI387_022929
GO:0039657	suppression by virus of host gene expression	biological_process	0.29795	1	1	2861	2	24160	gene-KI387_022929
GO:0039704	viral translational shunt	biological_process	0.29795	1	1	2861	2	24160	gene-KI387_022929
GO:0006004	fucose metabolic process	biological_process	0.29839	1	2	2861	7	24160	gene-KI387_022335,Novel04482
GO:0008736	L-fucose isomerase activity	molecular_function	0.29839	1	2	2861	7	24160	Novel04482,gene-KI387_022335
GO:0050661	NADP binding	molecular_function	0.29866	1	12	2861	77	24160	gene-KI387_002164,gene-KI387_019998,Novel02656,gene-KI387_012792,gene-KI387_038078,gene-KI387_019439,gene-KI387_010104,Novel01963,gene-KI387_032703,gene-KI387_019437,Novel02655,gene-KI387_010103
GO:0006890	retrograde vesicle-mediated transport, Golgi to endoplasmic reticulum	biological_process	0.2987	1	4	2861	22	24160	gene-KI387_014787,gene-KI387_012566,gene-KI387_011898,gene-KI387_015119
GO:0009690	cytokinin metabolic process	biological_process	0.29995	1	3	2861	14	24160	gene-KI387_015713,gene-KI387_023671,gene-KI387_031287
GO:0019139	cytokinin dehydrogenase activity	molecular_function	0.29995	1	3	2861	14	24160	gene-KI387_023671,gene-KI387_031287,gene-KI387_015713
GO:0034754	cellular hormone metabolic process	biological_process	0.29995	1	3	2861	14	24160	gene-KI387_031287,gene-KI387_023671,gene-KI387_015713
GO:0000323	lytic vacuole	cellular_component	0.3005	1	1	2861	3	24160	Novel02849
GO:0005764	lysosome	cellular_component	0.3005	1	1	2861	3	24160	Novel02849
GO:0009725	response to hormone	biological_process	0.30058	1	12	2861	85	24160	gene-KI387_007101,gene-KI387_033192,gene-KI387_027035,gene-KI387_035556,Novel04360,gene-KI387_008718,gene-KI387_020416,gene-KI387_023796,gene-KI387_017765,gene-KI387_035506,Novel04215,Novel07003
GO:0045944	positive regulation of transcription by RNA polymerase II	biological_process	0.30106	1	3	2861	17	24160	gene-KI387_037852,Novel02565,gene-KI387_041113
GO:0008073	ornithine decarboxylase inhibitor activity	molecular_function	0.30157	1	1	2861	3	24160	gene-KI387_016067
GO:0042979	ornithine decarboxylase regulator activity	molecular_function	0.30157	1	1	2861	3	24160	gene-KI387_016067
GO:0015318	inorganic molecular entity transmembrane transporter activity	molecular_function	0.30176	1	101	2861	754	24160	Novel06978,gene-KI387_038936,Novel05469,gene-KI387_025376,gene-KI387_004834,gene-KI387_034567,Novel04931,gene-KI387_015120,Novel06026,Novel03232,gene-KI387_019181,gene-KI387_000413,gene-KI387_024899,gene-KI387_021443,gene-KI387_014558,gene-KI387_007364,gene-KI387_018969,gene-KI387_014593,gene-KI387_022247,gene-KI387_008469,Novel00554,gene-KI387_032237,gene-KI387_030440,gene-KI387_037459,gene-KI38…
GO:0030058	amine dehydrogenase activity	molecular_function	0.30226	1	1	2861	3	24160	gene-KI387_034464
GO:0008203	cholesterol metabolic process	biological_process	0.30261	1	1	2861	3	24160	gene-KI387_004989
GO:1902652	secondary alcohol metabolic process	biological_process	0.30261	1	1	2861	3	24160	gene-KI387_004989
GO:0036128	CatSper complex	cellular_component	0.30283	1	2	2861	7	24160	gene-KI387_019115,Novel02515
GO:0032217	riboflavin transmembrane transporter activity	molecular_function	0.30323	1	1	2861	2	24160	gene-KI387_011451
GO:0032218	riboflavin transport	biological_process	0.30323	1	1	2861	2	24160	gene-KI387_011451
GO:0000350	generation of catalytic spliceosome for second transesterification step	biological_process	0.30415	1	1	2861	2	24160	Novel06516
GO:0000393	spliceosomal conformational changes to generate catalytic conformation	biological_process	0.30415	1	1	2861	2	24160	Novel06516
GO:0016867	intramolecular transferase activity, transferring acyl groups	molecular_function	0.30451	1	1	2861	2	24160	gene-KI387_020090
GO:0016993	precorrin-8X methylmutase activity	molecular_function	0.30451	1	1	2861	2	24160	gene-KI387_020090
GO:0019902	phosphatase binding	molecular_function	0.30485	1	3	2861	16	24160	gene-KI387_031655,gene-KI387_031700,Novel02371
GO:0019903	protein phosphatase binding	molecular_function	0.30485	1	3	2861	16	24160	Novel02371,gene-KI387_031700,gene-KI387_031655
GO:0007033	vacuole organization	biological_process	0.30565	1	2	2861	11	24160	gene-KI387_009794,gene-KI387_005905
GO:0019865	immunoglobulin binding	molecular_function	0.30614	1	1	2861	2	24160	Novel03059
GO:0001897	cytolysis by symbiont of host cells	biological_process	0.30618	1	3	2861	16	24160	gene-KI387_027591,gene-KI387_032037,gene-KI387_010228
GO:0019836	hemolysis by symbiont of host erythrocytes	biological_process	0.30618	1	3	2861	16	24160	gene-KI387_032037,gene-KI387_027591,gene-KI387_010228
GO:0045229	external encapsulating structure organization	biological_process	0.30628	1	15	2861	100	24160	gene-KI387_000422,gene-KI387_026504,gene-KI387_019866,gene-KI387_009490,gene-KI387_029394,gene-KI387_031520,Novel03780,gene-KI387_003828,Novel01742,gene-KI387_043349,gene-KI387_037977,Novel03399,gene-KI387_005848,gene-KI387_030199,gene-KI387_006254
GO:0044163	host cytoskeleton	cellular_component	0.3067	1	1	2861	4	24160	gene-KI387_010283
GO:0075519	microtubule-dependent intracellular transport of viral material	biological_process	0.3067	1	1	2861	4	24160	gene-KI387_010283
GO:0075521	microtubule-dependent intracellular transport of viral material towards nucleus	biological_process	0.3067	1	1	2861	4	24160	gene-KI387_010283
GO:0075606	transport of viral material towards nucleus	biological_process	0.3067	1	1	2861	4	24160	gene-KI387_010283
GO:0015450	P-P-bond-hydrolysis-driven protein transmembrane transporter activity	molecular_function	0.30703	1	1	2861	3	24160	gene-KI387_033462
GO:0007596	blood coagulation	biological_process	0.30929	1	8	2861	55	24160	gene-KI387_013415,gene-KI387_025953,gene-KI387_005255,Novel03173,gene-KI387_006020,gene-KI387_015120,gene-KI387_011870,gene-KI387_003620
GO:0015066	alpha-amylase inhibitor activity	molecular_function	0.3095	1	1	2861	3	24160	gene-KI387_006743
GO:0043419	urea catabolic process	biological_process	0.30967	1	1	2861	2	24160	Novel05483
GO:0010277	chlorophyllide a oxygenase [overall] activity	molecular_function	0.31197	1	2	2861	7	24160	gene-KI387_023251,gene-KI387_031803
GO:0043168	anion binding	molecular_function	0.31472	1	516	2861	3711	24160	gene-KI387_026009,gene-KI387_019050,gene-KI387_026739,gene-KI387_036867,gene-KI387_002644,gene-KI387_017652,gene-KI387_012064,gene-KI387_017481,gene-KI387_026188,gene-KI387_013528,gene-KI387_033676,gene-KI387_027917,gene-KI387_039451,Novel07258,gene-KI387_002412,gene-KI387_028113,gene-KI387_030365,gene-KI387_032938,gene-KI387_002510,gene-KI387_034145,gene-KI387_033369,Novel01779,gene-KI387_023671…
GO:0004127	cytidylate kinase activity	molecular_function	0.31544	1	5	2861	27	24160	gene-KI387_011451,gene-KI387_025622,gene-KI387_038045,Novel03542,gene-KI387_000049
GO:0071840	cellular component organization or biogenesis	biological_process	0.31556	1	188	2861	1521	24160	gene-KI387_021013,gene-KI387_033192,Novel04903,gene-KI387_000492,gene-KI387_017941,gene-KI387_026395,gene-KI387_029868,gene-KI387_031884,Novel06167,gene-KI387_034765,gene-KI387_031520,gene-KI387_008262,Novel02441,gene-KI387_025239,gene-KI387_021515,gene-KI387_016651,gene-KI387_024004,Novel01067,Novel07508,gene-KI387_021404,gene-KI387_008992,gene-KI387_008720,gene-KI387_037977,gene-KI387_032121,ge…
GO:0004499	N,N-dimethylaniline monooxygenase activity	molecular_function	0.31565	1	4	2861	23	24160	Novel02656,gene-KI387_010103,Novel02655,gene-KI387_010104
GO:0042325	regulation of phosphorylation	biological_process	0.31574	1	5	2861	29	24160	gene-KI387_035175,gene-KI387_017703,gene-KI387_007902,Novel00381,gene-KI387_003844
GO:0005200	structural constituent of cytoskeleton	molecular_function	0.31674	1	3	2861	16	24160	gene-KI387_029360,gene-KI387_008605,gene-KI387_041100
GO:0006269	DNA replication, synthesis of RNA primer	biological_process	0.31678	1	2	2861	7	24160	gene-KI387_029873,Novel04537
GO:0003697	single-stranded DNA binding	molecular_function	0.31761	1	6	2861	36	24160	gene-KI387_035952,gene-KI387_029347,gene-KI387_015284,gene-KI387_030500,gene-KI387_033706,gene-KI387_010074
GO:0006777	Mo-molybdopterin cofactor biosynthetic process	biological_process	0.31828	1	6	2861	33	24160	gene-KI387_011451,Novel03125,gene-KI387_033192,Novel06979,gene-KI387_021462,gene-KI387_026644
GO:0019720	Mo-molybdopterin cofactor metabolic process	biological_process	0.31828	1	6	2861	33	24160	gene-KI387_011451,Novel03125,gene-KI387_033192,Novel06979,gene-KI387_021462,gene-KI387_026644
GO:0048646	anatomical structure formation involved in morphogenesis	biological_process	0.31854	1	4	2861	26	24160	gene-KI387_031775,gene-KI387_036255,Novel01894,gene-KI387_023225
GO:0005524	ATP binding	molecular_function	0.31932	1	405	2861	2850	24160	Novel06186,gene-KI387_019157,gene-KI387_006089,gene-KI387_019256,gene-KI387_026349,gene-KI387_024913,Novel03975,gene-KI387_007279,gene-KI387_014800,gene-KI387_015775,gene-KI387_031987,gene-KI387_029347,gene-KI387_017249,gene-KI387_021404,gene-KI387_002540,gene-KI387_025239,Novel02508,gene-KI387_006760,Novel04312,gene-KI387_030194,gene-KI387_013681,gene-KI387_015068,gene-KI387_028890,gene-KI387_03…
GO:0039666	virion attachment to host cell pilus	biological_process	0.31952	1	1	2861	3	24160	gene-KI387_023725
GO:0030554	adenyl nucleotide binding	molecular_function	0.3198	1	420	2861	2966	24160	gene-KI387_019157,Novel06186,gene-KI387_024913,gene-KI387_006089,gene-KI387_019256,gene-KI387_026349,gene-KI387_014800,gene-KI387_007279,Novel03975,gene-KI387_031987,gene-KI387_015775,gene-KI387_017249,gene-KI387_029347,gene-KI387_044387,gene-KI387_002540,gene-KI387_021404,gene-KI387_025239,Novel02508,gene-KI387_006760,gene-KI387_015068,gene-KI387_028890,gene-KI387_013681,Novel04312,gene-KI387_03…
GO:0006542	glutamine biosynthetic process	biological_process	0.32114	1	2	2861	9	24160	gene-KI387_015469,gene-KI387_033126
GO:0016667	oxidoreductase activity, acting on a sulfur group of donors	molecular_function	0.32192	1	10	2861	79	24160	gene-KI387_002385,gene-KI387_006240,gene-KI387_003495,gene-KI387_021085,gene-KI387_025123,gene-KI387_009470,gene-KI387_003494,gene-KI387_032598,gene-KI387_012988,gene-KI387_038993
GO:0045454	cell redox homeostasis	biological_process	0.32285	1	12	2861	99	24160	gene-KI387_043278,gene-KI387_032987,gene-KI387_024004,gene-KI387_017879,gene-KI387_012988,gene-KI387_038017,gene-KI387_006240,gene-KI387_017878,Novel04005,gene-KI387_000026,gene-KI387_036700,gene-KI387_021085
GO:0016286	small conductance calcium-activated potassium channel activity	molecular_function	0.32701	1	1	2861	3	24160	gene-KI387_019866
GO:0043631	RNA polyadenylation	biological_process	0.3281	1	3	2861	15	24160	gene-KI387_005912,gene-KI387_005910,gene-KI387_012712
GO:0015643	toxic substance binding	molecular_function	0.32955	1	2	2861	10	24160	Novel05534,Novel04456
GO:0051301	cell division	biological_process	0.33005	1	19	2861	164	24160	gene-KI387_035631,gene-KI387_025770,gene-KI387_038813,gene-KI387_019667,gene-KI387_035503,Novel02825,gene-KI387_032300,gene-KI387_037852,gene-KI387_027203,Novel04402,gene-KI387_030500,Novel07301,gene-KI387_000695,gene-KI387_015119,gene-KI387_017941,Novel02794,Novel03340,gene-KI387_000696,gene-KI387_025626
GO:0016458	gene silencing	biological_process	0.3307	1	6	2861	34	24160	gene-KI387_003795,Novel02565,gene-KI387_024848,gene-KI387_030903,Novel04351,Novel06149
GO:0031047	gene silencing by RNA	biological_process	0.3307	1	6	2861	34	24160	gene-KI387_030903,Novel04351,Novel06149,gene-KI387_024848,Novel02565,gene-KI387_003795
GO:0006368	transcription elongation from RNA polymerase II promoter	biological_process	0.33283	1	4	2861	24	24160	Novel02565,gene-KI387_030371,gene-KI387_041113,gene-KI387_010824
GO:0004526	ribonuclease P activity	molecular_function	0.33383	1	2	2861	10	24160	Novel00042,gene-KI387_038880
GO:0015085	calcium ion transmembrane transporter activity	molecular_function	0.33468	1	6	2861	41	24160	gene-KI387_023507,gene-KI387_005247,gene-KI387_025376,gene-KI387_036725,gene-KI387_033175,gene-KI387_033736
GO:0070603	SWI/SNF superfamily-type complex	cellular_component	0.33497	1	2	2861	8	24160	Novel03044,gene-KI387_008890
GO:0010383	cell wall polysaccharide metabolic process	biological_process	0.33503	1	1	2861	4	24160	gene-KI387_042546
GO:0010410	hemicellulose metabolic process	biological_process	0.33503	1	1	2861	4	24160	gene-KI387_042546
GO:0044347	cell wall polysaccharide catabolic process	biological_process	0.33503	1	1	2861	4	24160	gene-KI387_042546
GO:0045491	xylan metabolic process	biological_process	0.33503	1	1	2861	4	24160	gene-KI387_042546
GO:0045493	xylan catabolic process	biological_process	0.33503	1	1	2861	4	24160	gene-KI387_042546
GO:0046559	alpha-glucuronidase activity	molecular_function	0.33503	1	1	2861	4	24160	gene-KI387_042546
GO:0071816	tail-anchored membrane protein insertion into ER membrane	biological_process	0.33563	1	2	2861	10	24160	Novel05615,gene-KI387_009072
GO:0007166	cell surface receptor signaling pathway	biological_process	0.33675	1	15	2861	101	24160	gene-KI387_030894,gene-KI387_032563,gene-KI387_010355,gene-KI387_001148,gene-KI387_021300,Novel06443,gene-KI387_012666,gene-KI387_022303,Novel02652,gene-KI387_022918,gene-KI387_035995,gene-KI387_037852,gene-KI387_015386,gene-KI387_015382,gene-KI387_015378
GO:0001775	cell activation	biological_process	0.33691	1	8	2861	56	24160	gene-KI387_005255,gene-KI387_013415,gene-KI387_018245,gene-KI387_025953,gene-KI387_011870,gene-KI387_003620,gene-KI387_006020,gene-KI387_015120
GO:0016861	intramolecular oxidoreductase activity, interconverting aldoses and ketoses	molecular_function	0.33704	1	5	2861	34	24160	gene-KI387_016264,Novel04482,gene-KI387_022335,gene-KI387_019194,gene-KI387_035478
GO:0016604	nuclear body	cellular_component	0.33807	1	1	2861	3	24160	gene-KI387_037852
GO:0016607	nuclear speck	cellular_component	0.33807	1	1	2861	3	24160	gene-KI387_037852
GO:0009426	bacterial-type flagellum basal body, distal rod	cellular_component	0.33812	1	1	2861	4	24160	gene-KI387_037720
GO:0009427	bacterial-type flagellum basal body, distal rod, L ring	cellular_component	0.33812	1	1	2861	4	24160	gene-KI387_037720
GO:0030694	bacterial-type flagellum basal body, rod	cellular_component	0.33812	1	1	2861	4	24160	gene-KI387_037720
GO:0030474	spindle pole body duplication	biological_process	0.33833	1	2	2861	10	24160	gene-KI387_008605,gene-KI387_002957
GO:0051300	spindle pole body organization	biological_process	0.33833	1	2	2861	10	24160	gene-KI387_002957,gene-KI387_008605
GO:0008837	diaminopimelate epimerase activity	molecular_function	0.33865	1	1	2861	3	24160	Novel06147
GO:0047661	amino-acid racemase activity	molecular_function	0.33865	1	1	2861	3	24160	Novel06147
GO:0008855	exodeoxyribonuclease VII activity	molecular_function	0.34052	1	11	2861	69	24160	gene-KI387_025960,gene-KI387_028107,gene-KI387_015456,gene-KI387_014886,gene-KI387_005255,gene-KI387_002882,gene-KI387_005814,gene-KI387_016802,gene-KI387_026959,gene-KI387_034994,gene-KI387_021000
GO:0008771	[citrate (pro-3S)-lyase] ligase activity	molecular_function	0.34114	1	1	2861	3	24160	gene-KI387_019583
GO:0019887	protein kinase regulator activity	molecular_function	0.34133	1	5	2861	32	24160	gene-KI387_032023,gene-KI387_011802,Novel01311,Novel05903,Novel04864
GO:0008152	metabolic process	biological_process	0.34168	1	1468	2861	11893	24160	gene-KI387_022317,gene-KI387_037221,gene-KI387_042319,Novel02818,gene-KI387_008605,gene-KI387_016032,gene-KI387_014643,gene-KI387_020747,gene-KI387_010664,Novel01122,gene-KI387_020056,gene-KI387_025123,gene-KI387_013606,gene-KI387_039683,gene-KI387_038045,gene-KI387_001317,gene-KI387_027180,gene-KI387_005367,gene-KI387_002081,gene-KI387_036104,gene-KI387_023060,Novel04174,Novel06327,gene-KI387_01…
GO:0032786	positive regulation of DNA-templated transcription, elongation	biological_process	0.34431	1	2	2861	11	24160	gene-KI387_041113,Novel02565
GO:0032968	positive regulation of transcription elongation from RNA polymerase II promoter	biological_process	0.34431	1	2	2861	11	24160	gene-KI387_041113,Novel02565
GO:0034243	regulation of transcription elongation from RNA polymerase II promoter	biological_process	0.34431	1	2	2861	11	24160	gene-KI387_041113,Novel02565
GO:0042618	poly-hydroxybutyrate metabolic process	biological_process	0.34632	1	1	2861	3	24160	gene-KI387_006735
GO:0042619	poly-hydroxybutyrate biosynthetic process	biological_process	0.34632	1	1	2861	3	24160	gene-KI387_006735
GO:1901440	poly(hydroxyalkanoate) metabolic process	biological_process	0.34632	1	1	2861	3	24160	gene-KI387_006735
GO:1901441	poly(hydroxyalkanoate) biosynthetic process	biological_process	0.34632	1	1	2861	3	24160	gene-KI387_006735
GO:0030896	checkpoint clamp complex	cellular_component	0.3466	1	3	2861	16	24160	Novel04146,gene-KI387_037640,gene-KI387_031285
GO:0051172	negative regulation of nitrogen compound metabolic process	biological_process	0.34835	1	10	2861	69	24160	Novel03833,gene-KI387_022303,Novel00556,Novel00180,Novel04215,Novel02501,gene-KI387_008144,gene-KI387_010359,Novel00083,gene-KI387_022908
GO:0000077	DNA damage checkpoint	biological_process	0.34836	1	4	2861	23	24160	gene-KI387_016654,gene-KI387_031285,gene-KI387_037640,Novel04146
GO:0031570	DNA integrity checkpoint	biological_process	0.34836	1	4	2861	23	24160	gene-KI387_031285,gene-KI387_016654,Novel04146,gene-KI387_037640
GO:0038023	signaling receptor activity	molecular_function	0.34877	1	18	2861	117	24160	gene-KI387_022318,gene-KI387_029453,gene-KI387_041763,gene-KI387_033177,gene-KI387_035338,gene-KI387_015386,gene-KI387_031011,gene-KI387_002062,Novel05012,gene-KI387_034145,gene-KI387_010355,gene-KI387_019181,gene-KI387_000413,gene-KI387_030371,gene-KI387_018969,gene-KI387_035341,gene-KI387_021443,gene-KI387_015382
GO:0009496	plastoquinol--plastocyanin reductase activity	molecular_function	0.34982	1	1	2861	4	24160	gene-KI387_016931
GO:0052880	oxidoreductase activity, acting on diphenols and related substances as donors, with copper protein as acceptor	molecular_function	0.34982	1	1	2861	4	24160	gene-KI387_016931
GO:0010817	regulation of hormone levels	biological_process	0.34997	1	3	2861	15	24160	gene-KI387_023671,gene-KI387_031287,gene-KI387_015713
GO:0042445	hormone metabolic process	biological_process	0.34997	1	3	2861	15	24160	gene-KI387_023671,gene-KI387_031287,gene-KI387_015713
GO:0006308	DNA catabolic process	biological_process	0.35013	1	2	2861	10	24160	gene-KI387_033078,gene-KI387_026959
GO:0032559	adenyl ribonucleotide binding	molecular_function	0.35019	1	417	2861	2952	24160	Novel01204,gene-KI387_010646,gene-KI387_016272,gene-KI387_023942,gene-KI387_037910,gene-KI387_043795,gene-KI387_035338,gene-KI387_016025,gene-KI387_025607,gene-KI387_024023,gene-KI387_042936,gene-KI387_016802,gene-KI387_010074,gene-KI387_031775,gene-KI387_015188,gene-KI387_014752,gene-KI387_005785,Novel03211,gene-KI387_005548,gene-KI387_022799,Novel00609,gene-KI387_027179,gene-KI387_031381,gene-K…
GO:0016715	oxidoreductase activity, acting on paired donors, with incorporation or reduction of molecular oxygen, reduced ascorbate as one donor, and incorporation of one atom of oxygen	molecular_function	0.35041	1	1	2861	3	24160	gene-KI387_010555
GO:0031365	N-terminal protein amino acid modification	biological_process	0.35083	1	3	2861	17	24160	gene-KI387_015766,gene-KI387_023727,gene-KI387_010848
GO:0034599	cellular response to oxidative stress	biological_process	0.35095	1	1	2861	6	24160	gene-KI387_032657
GO:0062197	cellular response to chemical stress	biological_process	0.35095	1	1	2861	6	24160	gene-KI387_032657
GO:0010256	endomembrane system organization	biological_process	0.35448	1	8	2861	58	24160	gene-KI387_026395,gene-KI387_035603,gene-KI387_014886,Novel05615,gene-KI387_009072,Novel01404,gene-KI387_019052,gene-KI387_006085
GO:0010827	regulation of glucose transmembrane transport	biological_process	0.35458	1	1	2861	3	24160	Novel06919
GO:0010829	negative regulation of glucose transmembrane transport	biological_process	0.35458	1	1	2861	3	24160	Novel06919
GO:0034762	regulation of transmembrane transport	biological_process	0.35458	1	1	2861	3	24160	Novel06919
GO:0034763	negative regulation of transmembrane transport	biological_process	0.35458	1	1	2861	3	24160	Novel06919
GO:0046323	glucose import	biological_process	0.35458	1	1	2861	3	24160	Novel06919
GO:0046324	regulation of glucose import	biological_process	0.35458	1	1	2861	3	24160	Novel06919
GO:0046325	negative regulation of glucose import	biological_process	0.35458	1	1	2861	3	24160	Novel06919
GO:1904659	glucose transmembrane transport	biological_process	0.35458	1	1	2861	3	24160	Novel06919
GO:0009605	response to external stimulus	biological_process	0.35585	1	42	2861	379	24160	Novel01803,gene-KI387_033634,gene-KI387_033682,gene-KI387_022648,Novel03173,gene-KI387_035433,Novel07020,gene-KI387_018047,gene-KI387_002297,Novel04958,gene-KI387_022646,gene-KI387_024993,gene-KI387_029371,gene-KI387_015637,gene-KI387_022654,gene-KI387_019300,gene-KI387_010611,Novel07019,Novel03431,gene-KI387_025090,gene-KI387_012362,gene-KI387_032237,Novel02429,gene-KI387_013007,gene-KI387_01620…
GO:0044179	hemolysis in other organism	biological_process	0.35706	1	3	2861	17	24160	gene-KI387_010228,gene-KI387_027591,gene-KI387_032037
GO:0051715	cytolysis in other organism	biological_process	0.35706	1	3	2861	17	24160	gene-KI387_032037,gene-KI387_027591,gene-KI387_010228
GO:0051801	cytolysis in other organism involved in symbiotic interaction	biological_process	0.35706	1	3	2861	17	24160	gene-KI387_010228,gene-KI387_032037,gene-KI387_027591
GO:0052331	hemolysis in other organism involved in symbiotic interaction	biological_process	0.35706	1	3	2861	17	24160	gene-KI387_010228,gene-KI387_032037,gene-KI387_027591
GO:0035195	gene silencing by miRNA	biological_process	0.35711	1	1	2861	3	24160	gene-KI387_024848
GO:0060147	regulation of posttranscriptional gene silencing	biological_process	0.35711	1	1	2861	3	24160	gene-KI387_024848
GO:0060964	regulation of gene silencing by miRNA	biological_process	0.35711	1	1	2861	3	24160	gene-KI387_024848
GO:0034593	phosphatidylinositol bisphosphate phosphatase activity	molecular_function	0.35796	1	1	2861	4	24160	gene-KI387_022307
GO:0034596	phosphatidylinositol phosphate 4-phosphatase activity	molecular_function	0.35796	1	1	2861	4	24160	gene-KI387_022307
GO:0034597	phosphatidylinositol-4,5-bisphosphate 4-phosphatase activity	molecular_function	0.35796	1	1	2861	4	24160	gene-KI387_022307
GO:0046839	phospholipid dephosphorylation	biological_process	0.35796	1	1	2861	4	24160	gene-KI387_022307
GO:0046856	phosphatidylinositol dephosphorylation	biological_process	0.35796	1	1	2861	4	24160	gene-KI387_022307
GO:0052866	phosphatidylinositol phosphate phosphatase activity	molecular_function	0.35796	1	1	2861	4	24160	gene-KI387_022307
GO:0106019	phosphatidylinositol-4,5-bisphosphate phosphatase activity	molecular_function	0.35796	1	1	2861	4	24160	gene-KI387_022307
GO:0007018	microtubule-based movement	biological_process	0.35846	1	17	2861	114	24160	gene-KI387_023866,gene-KI387_036167,gene-KI387_039261,gene-KI387_006299,gene-KI387_023454,Novel02028,gene-KI387_015068,gene-KI387_006735,gene-KI387_006743,gene-KI387_002375,gene-KI387_025607,gene-KI387_016802,gene-KI387_034972,gene-KI387_024634,Novel00908,gene-KI387_025960,gene-KI387_020535
GO:0070848	response to growth factor	biological_process	0.35871	1	1	2861	3	24160	gene-KI387_030894
GO:0071363	cellular response to growth factor stimulus	biological_process	0.35871	1	1	2861	3	24160	gene-KI387_030894
GO:0009245	lipid A biosynthetic process	biological_process	0.35887	1	5	2861	32	24160	gene-KI387_012562,gene-KI387_012559,gene-KI387_039361,gene-KI387_019517,gene-KI387_008045
GO:0046493	lipid A metabolic process	biological_process	0.35887	1	5	2861	32	24160	gene-KI387_008045,gene-KI387_019517,gene-KI387_039361,gene-KI387_012559,gene-KI387_012562
GO:1901269	lipooligosaccharide metabolic process	biological_process	0.35887	1	5	2861	32	24160	gene-KI387_008045,gene-KI387_019517,gene-KI387_039361,gene-KI387_012559,gene-KI387_012562
GO:1901271	lipooligosaccharide biosynthetic process	biological_process	0.35887	1	5	2861	32	24160	gene-KI387_012559,gene-KI387_012562,gene-KI387_019517,gene-KI387_008045,gene-KI387_039361
GO:0005337	nucleoside transmembrane transporter activity	molecular_function	0.35972	1	2	2861	11	24160	gene-KI387_023071,Novel04773
GO:0015858	nucleoside transport	biological_process	0.35972	1	2	2861	11	24160	gene-KI387_023071,Novel04773
GO:0030599	pectinesterase activity	molecular_function	0.36018	1	9	2861	59	24160	gene-KI387_029394,gene-KI387_026504,gene-KI387_009490,gene-KI387_000422,gene-KI387_003828,gene-KI387_037977,Novel01742,gene-KI387_006254,gene-KI387_005848
GO:0042545	cell wall modification	biological_process	0.36018	1	9	2861	59	24160	gene-KI387_029394,gene-KI387_026504,gene-KI387_009490,gene-KI387_000422,gene-KI387_037977,gene-KI387_003828,Novel01742,gene-KI387_006254,gene-KI387_005848
GO:0001671	ATPase activator activity	molecular_function	0.3616	1	1	2861	5	24160	gene-KI387_006717
GO:0031262	Ndc80 complex	cellular_component	0.36161	1	2	2861	9	24160	gene-KI387_035995,gene-KI387_018789
GO:0031617	NMS complex	cellular_component	0.36161	1	2	2861	9	24160	gene-KI387_035995,gene-KI387_018789
GO:0003906	DNA-(apurinic or apyrimidinic site) endonuclease activity	molecular_function	0.36203	1	1	2861	4	24160	Novel01416
GO:0016799	hydrolase activity, hydrolyzing N-glycosyl compounds	molecular_function	0.36241	1	3	2861	18	24160	Novel06724,gene-KI387_015529,Novel01416
GO:0030479	actin cortical patch	cellular_component	0.36335	1	1	2861	3	24160	gene-KI387_026648
GO:0030863	cortical cytoskeleton	cellular_component	0.36335	1	1	2861	3	24160	gene-KI387_026648
GO:0030864	cortical actin cytoskeleton	cellular_component	0.36335	1	1	2861	3	24160	gene-KI387_026648
GO:0061645	endocytic patch	cellular_component	0.36335	1	1	2861	3	24160	gene-KI387_026648
GO:0007338	single fertilization	biological_process	0.36474	1	2	2861	10	24160	gene-KI387_030725,Novel02371
GO:0009566	fertilization	biological_process	0.36474	1	2	2861	10	24160	gene-KI387_030725,Novel02371
GO:0051606	detection of stimulus	biological_process	0.36532	1	3	2861	18	24160	gene-KI387_021666,gene-KI387_029371,Novel06427
GO:0034453	microtubule anchoring	biological_process	0.36553	1	1	2861	3	24160	Novel02441
GO:0005496	steroid binding	molecular_function	0.36604	1	3	2861	17	24160	gene-KI387_020416,Novel04360,gene-KI387_027035
GO:0033993	response to lipid	biological_process	0.36604	1	3	2861	17	24160	gene-KI387_020416,Novel04360,gene-KI387_027035
GO:0043401	steroid hormone mediated signaling pathway	biological_process	0.36604	1	3	2861	17	24160	gene-KI387_027035,Novel04360,gene-KI387_020416
GO:0048545	response to steroid hormone	biological_process	0.36604	1	3	2861	17	24160	gene-KI387_020416,gene-KI387_027035,Novel04360
GO:0071383	cellular response to steroid hormone stimulus	biological_process	0.36604	1	3	2861	17	24160	Novel04360,gene-KI387_027035,gene-KI387_020416
GO:0071396	cellular response to lipid	biological_process	0.36604	1	3	2861	17	24160	Novel04360,gene-KI387_027035,gene-KI387_020416
GO:0003334	keratinocyte development	biological_process	0.36666	1	1	2861	3	24160	Novel01910
GO:0019049	mitigation of host defenses by virus	biological_process	0.36673	1	2	2861	9	24160	gene-KI387_033897,gene-KI387_030950
GO:0016725	oxidoreductase activity, acting on CH or CH2 groups	molecular_function	0.36773	1	2	2861	9	24160	gene-KI387_035356,gene-KI387_026009
GO:0004652	polynucleotide adenylyltransferase activity	molecular_function	0.36778	1	3	2861	15	24160	gene-KI387_005912,gene-KI387_005910,gene-KI387_012712
GO:0061617	MICOS complex	cellular_component	0.36812	1	4	2861	26	24160	gene-KI387_042546,gene-KI387_020416,gene-KI387_021000,gene-KI387_023358
GO:0005742	mitochondrial outer membrane translocase complex	cellular_component	0.36879	1	4	2861	23	24160	gene-KI387_022676,gene-KI387_039966,gene-KI387_022317,gene-KI387_002463
GO:0005249	voltage-gated potassium channel activity	molecular_function	0.3688	1	2	2861	10	24160	gene-KI387_032296,Novel00827
GO:0048037	obsolete cofactor binding	molecular_function	0.3689	1	1	2861	3	24160	gene-KI387_020578
GO:0004673	protein histidine kinase activity	molecular_function	0.3699	1	10	2861	61	24160	gene-KI387_024078,gene-KI387_020237,gene-KI387_025123,gene-KI387_020090,gene-KI387_035734,gene-KI387_017807,gene-KI387_015215,gene-KI387_021665,gene-KI387_025096,gene-KI387_029371
GO:0016775	phosphotransferase activity, nitrogenous group as acceptor	molecular_function	0.3699	1	10	2861	61	24160	gene-KI387_020237,gene-KI387_024078,gene-KI387_025123,gene-KI387_020090,gene-KI387_035734,gene-KI387_017807,gene-KI387_015215,gene-KI387_021665,gene-KI387_025096,gene-KI387_029371
GO:0016776	phosphotransferase activity, phosphate group as acceptor	molecular_function	0.37011	1	11	2861	79	24160	gene-KI387_002697,gene-KI387_025622,Novel03542,Novel02292,gene-KI387_038045,gene-KI387_000049,gene-KI387_025940,Novel01457,gene-KI387_024034,gene-KI387_011451,gene-KI387_006189
GO:0015252	proton channel activity	molecular_function	0.37046	1	5	2861	37	24160	gene-KI387_024034,gene-KI387_025940,gene-KI387_002697,Novel02292,Novel01457
GO:0046933	proton-transporting ATP synthase activity, rotational mechanism	molecular_function	0.37046	1	5	2861	37	24160	Novel01457,gene-KI387_025940,gene-KI387_002697,Novel02292,gene-KI387_024034
GO:0043549	regulation of kinase activity	biological_process	0.37048	1	4	2861	24	24160	Novel00381,gene-KI387_003844,gene-KI387_035175,gene-KI387_017703
GO:0045859	regulation of protein kinase activity	biological_process	0.37048	1	4	2861	24	24160	Novel00381,gene-KI387_003844,gene-KI387_035175,gene-KI387_017703
GO:0051338	regulation of transferase activity	biological_process	0.37048	1	4	2861	24	24160	Novel00381,gene-KI387_003844,gene-KI387_035175,gene-KI387_017703
GO:0030151	molybdenum ion binding	molecular_function	0.37082	1	2	2861	10	24160	gene-KI387_023678,gene-KI387_021488
GO:0008201	heparin binding	molecular_function	0.371	1	2	2861	9	24160	gene-KI387_027885,gene-KI387_030748
GO:0048584	positive regulation of response to stimulus	biological_process	0.37103	1	6	2861	33	24160	gene-KI387_024888,Novel00919,Novel07208,gene-KI387_032563,gene-KI387_032037,gene-KI387_035995
GO:0090482	vitamin transmembrane transporter activity	molecular_function	0.37157	1	2	2861	9	24160	gene-KI387_011451,Novel06552
GO:0030153	bacteriocin immunity	biological_process	0.37235	1	2	2861	10	24160	Novel05534,Novel04456
GO:0001653	peptide receptor activity	molecular_function	0.37236	1	2	2861	12	24160	gene-KI387_035341,gene-KI387_035338
GO:0008528	G protein-coupled peptide receptor activity	molecular_function	0.37236	1	2	2861	12	24160	gene-KI387_035341,gene-KI387_035338
GO:0009424	bacterial-type flagellum hook	cellular_component	0.37278	1	2	2861	10	24160	gene-KI387_026497,gene-KI387_025961
GO:0006446	regulation of translational initiation	biological_process	0.37302	1	2	2861	10	24160	gene-KI387_010359,gene-KI387_022303
GO:0008190	eukaryotic initiation factor 4E binding	molecular_function	0.37302	1	2	2861	10	24160	gene-KI387_010359,gene-KI387_022303
GO:0045947	negative regulation of translational initiation	biological_process	0.37302	1	2	2861	10	24160	gene-KI387_010359,gene-KI387_022303
GO:0042151	nematocyst	cellular_component	0.37657	1	2	2861	9	24160	Novel07230,Novel05014
GO:0000774	adenyl-nucleotide exchange factor activity	molecular_function	0.37781	1	3	2861	18	24160	gene-KI387_038049,Novel02613,gene-KI387_003620
GO:0005516	calmodulin binding	molecular_function	0.37803	1	5	2861	28	24160	gene-KI387_039738,Novel06919,gene-KI387_034906,gene-KI387_024600,Novel06059
GO:0000921	septin ring assembly	biological_process	0.37819	1	2	2861	12	24160	gene-KI387_024161,gene-KI387_015456
GO:0005940	septin ring	cellular_component	0.37819	1	2	2861	12	24160	gene-KI387_024161,gene-KI387_015456
GO:0031106	septin ring organization	biological_process	0.37819	1	2	2861	12	24160	gene-KI387_024161,gene-KI387_015456
GO:0032156	septin cytoskeleton	cellular_component	0.37819	1	2	2861	12	24160	gene-KI387_024161,gene-KI387_015456
GO:0032185	septin cytoskeleton organization	biological_process	0.37819	1	2	2861	12	24160	gene-KI387_015456,gene-KI387_024161
GO:0034219	carbohydrate transmembrane transport	biological_process	0.38113	1	2	2861	9	24160	Novel06919,gene-KI387_005704
GO:0019068	virion assembly	biological_process	0.38141	1	10	2861	74	24160	gene-KI387_025953,gene-KI387_013795,gene-KI387_025090,gene-KI387_000034,gene-KI387_032496,gene-KI387_036186,gene-KI387_010838,gene-KI387_025078,Novel04200,gene-KI387_039542
GO:0065002	intracellular protein transmembrane transport	biological_process	0.38154	1	5	2861	30	24160	gene-KI387_012544,gene-KI387_002463,gene-KI387_022317,gene-KI387_018291,gene-KI387_039966
GO:0006541	glutamine metabolic process	biological_process	0.38263	1	2	2861	10	24160	gene-KI387_015469,gene-KI387_033126
GO:0036297	interstrand cross-link repair	biological_process	0.38267	1	3	2861	17	24160	Novel05763,gene-KI387_035519,Novel01399
GO:0043240	Fanconi anaemia nuclear complex	cellular_component	0.38267	1	3	2861	17	24160	Novel01399,gene-KI387_035519,Novel05763
GO:0015097	mercury ion transmembrane transporter activity	molecular_function	0.38301	1	3	2861	17	24160	gene-KI387_014558,gene-KI387_037459,gene-KI387_029421
GO:0015694	mercury ion transport	biological_process	0.38301	1	3	2861	17	24160	gene-KI387_029421,gene-KI387_014558,gene-KI387_037459
GO:0046689	response to mercury ion	biological_process	0.38301	1	3	2861	17	24160	gene-KI387_037459,gene-KI387_014558,gene-KI387_029421
GO:0050787	detoxification of mercury ion	biological_process	0.38301	1	3	2861	17	24160	gene-KI387_037459,gene-KI387_014558,gene-KI387_029421
GO:0008092	cytoskeletal protein binding	molecular_function	0.38346	1	43	2861	311	24160	Novel02794,gene-KI387_016802,gene-KI387_024634,gene-KI387_023507,gene-KI387_032121,Novel07208,gene-KI387_025960,gene-KI387_011090,gene-KI387_000036,Novel03153,Novel03887,gene-KI387_022303,gene-KI387_036167,gene-KI387_006299,gene-KI387_021462,gene-KI387_039261,Novel06439,gene-KI387_002081,gene-KI387_006743,gene-KI387_002375,gene-KI387_006735,gene-KI387_037852,gene-KI387_035952,gene-KI387_005255,ge…
GO:0032502	developmental process	biological_process	0.38573	1	46	2861	360	24160	gene-KI387_024903,gene-KI387_026504,gene-KI387_020656,gene-KI387_039488,gene-KI387_000234,gene-KI387_032245,gene-KI387_004093,gene-KI387_022303,gene-KI387_012666,gene-KI387_017214,Novel02989,gene-KI387_003034,gene-KI387_015386,Novel02153,gene-KI387_024131,Novel06552,gene-KI387_038708,gene-KI387_021300,gene-KI387_014109,gene-KI387_023225,gene-KI387_024352,gene-KI387_031775,gene-KI387_022315,Novel0…
GO:0006274	DNA replication termination	biological_process	0.38578	1	1	2861	3	24160	gene-KI387_031520
GO:0051270	regulation of cellular component movement	biological_process	0.3871	1	3	2861	16	24160	gene-KI387_033088,gene-KI387_015750,Novel00908
GO:0030193	regulation of blood coagulation	biological_process	0.38725	1	1	2861	4	24160	Novel03173
GO:0050818	regulation of coagulation	biological_process	0.38725	1	1	2861	4	24160	Novel03173
GO:0061041	regulation of wound healing	biological_process	0.38725	1	1	2861	4	24160	Novel03173
GO:1900046	regulation of hemostasis	biological_process	0.38725	1	1	2861	4	24160	Novel03173
GO:1903034	regulation of response to wounding	biological_process	0.38725	1	1	2861	4	24160	Novel03173
GO:0000315	organellar large ribosomal subunit	cellular_component	0.38786	1	1	2861	4	24160	gene-KI387_033296
GO:0005762	mitochondrial large ribosomal subunit	cellular_component	0.38786	1	1	2861	4	24160	gene-KI387_033296
GO:0061695	transferase complex, transferring phosphorus-containing groups	cellular_component	0.38837	1	17	2861	137	24160	gene-KI387_031655,gene-KI387_022996,gene-KI387_030371,gene-KI387_014286,Novel02886,gene-KI387_001578,gene-KI387_014166,gene-KI387_005177,gene-KI387_025103,Novel02662,gene-KI387_014278,gene-KI387_010824,gene-KI387_003117,gene-KI387_031529,gene-KI387_035130,gene-KI387_005247,gene-KI387_013319
GO:0030515	snoRNA binding	molecular_function	0.38902	1	2	2861	10	24160	gene-KI387_016651,Novel02505
GO:0003910	DNA ligase (ATP) activity	molecular_function	0.38993	1	2	2861	10	24160	gene-KI387_014494,gene-KI387_023727
GO:0031555	transcriptional attenuation	biological_process	0.39027	1	1	2861	4	24160	gene-KI387_024587
GO:0031556	transcriptional attenuation by ribosome	biological_process	0.39027	1	1	2861	4	24160	gene-KI387_024587
GO:0031325	positive regulation of cellular metabolic process	biological_process	0.391	1	11	2861	79	24160	Novel03665,gene-KI387_041113,Novel06186,Novel06145,Novel00067,Novel02565,gene-KI387_037293,gene-KI387_034125,gene-KI387_033210,gene-KI387_037852,gene-KI387_023573
GO:0051173	positive regulation of nitrogen compound metabolic process	biological_process	0.391	1	11	2861	79	24160	gene-KI387_033210,gene-KI387_023573,gene-KI387_037852,gene-KI387_037293,gene-KI387_034125,Novel06145,Novel06186,Novel02565,Novel00067,Novel03665,gene-KI387_041113
GO:0032886	regulation of microtubule-based process	biological_process	0.391	1	2	2861	10	24160	Novel00908,Novel05638
GO:0031304	intrinsic component of mitochondrial inner membrane	cellular_component	0.39146	1	4	2861	27	24160	gene-KI387_042546,gene-KI387_020416,gene-KI387_023358,gene-KI387_021000
GO:0031305	integral component of mitochondrial inner membrane	cellular_component	0.39146	1	4	2861	27	24160	gene-KI387_021000,gene-KI387_023358,gene-KI387_020416,gene-KI387_042546
GO:0032592	integral component of mitochondrial membrane	cellular_component	0.39146	1	4	2861	27	24160	gene-KI387_021000,gene-KI387_023358,gene-KI387_042546,gene-KI387_020416
GO:0098573	intrinsic component of mitochondrial membrane	cellular_component	0.39146	1	4	2861	27	24160	gene-KI387_023358,gene-KI387_021000,gene-KI387_042546,gene-KI387_020416
GO:0046915	transition metal ion transmembrane transporter activity	molecular_function	0.39181	1	7	2861	46	24160	gene-KI387_037724,gene-KI387_028945,Novel07197,gene-KI387_037459,gene-KI387_014558,gene-KI387_008890,gene-KI387_029421
GO:0004146	dihydrofolate reductase activity	molecular_function	0.39289	1	1	2861	4	24160	gene-KI387_006691
GO:0016593	Cdc73/Paf1 complex	cellular_component	0.39318	1	2	2861	10	24160	gene-KI387_010824,gene-KI387_030371
GO:0008897	holo-[acyl-carrier-protein] synthase activity	molecular_function	0.39323	1	1	2861	4	24160	gene-KI387_026056
GO:0009719	response to endogenous stimulus	biological_process	0.39353	1	12	2861	92	24160	gene-KI387_023796,gene-KI387_035506,gene-KI387_017765,Novel04215,Novel07003,gene-KI387_007101,gene-KI387_033192,gene-KI387_027035,gene-KI387_035556,Novel04360,gene-KI387_008718,gene-KI387_020416
GO:0006612	protein targeting to membrane	biological_process	0.39511	1	11	2861	79	24160	gene-KI387_016272,gene-KI387_036854,gene-KI387_012544,gene-KI387_011378,gene-KI387_033192,gene-KI387_021013,gene-KI387_027956,gene-KI387_005548,gene-KI387_018291,gene-KI387_002012,gene-KI387_035637
GO:0005085	guanyl-nucleotide exchange factor activity	molecular_function	0.39529	1	5	2861	32	24160	gene-KI387_004726,gene-KI387_009841,gene-KI387_030295,Novel00918,gene-KI387_026620
GO:1903825	organic acid transmembrane transport	biological_process	0.39585	1	5	2861	35	24160	Novel04001,gene-KI387_014560,gene-KI387_015775,gene-KI387_027183,gene-KI387_005704
GO:1905039	carboxylic acid transmembrane transport	biological_process	0.39585	1	5	2861	35	24160	gene-KI387_014560,gene-KI387_015775,gene-KI387_027183,gene-KI387_005704,Novel04001
GO:0050853	B cell receptor signaling pathway	biological_process	0.39672	1	1	2861	3	24160	gene-KI387_035995
GO:0006354	DNA-templated transcription, elongation	biological_process	0.39684	1	4	2861	26	24160	gene-KI387_030371,Novel02565,gene-KI387_010824,gene-KI387_041113
GO:0019627	urea metabolic process	biological_process	0.39803	1	1	2861	3	24160	Novel05483
GO:0009967	positive regulation of signal transduction	biological_process	0.39846	1	4	2861	22	24160	gene-KI387_032037,Novel07208,Novel00919,gene-KI387_024888
GO:0010647	positive regulation of cell communication	biological_process	0.39846	1	4	2861	22	24160	Novel00919,Novel07208,gene-KI387_024888,gene-KI387_032037
GO:0023056	positive regulation of signaling	biological_process	0.39846	1	4	2861	22	24160	gene-KI387_032037,gene-KI387_024888,Novel00919,Novel07208
GO:0005185	neurohypophyseal hormone activity	molecular_function	0.39861	1	1	2861	4	24160	gene-KI387_035588
GO:0009263	deoxyribonucleotide biosynthetic process	biological_process	0.3987	1	1	2861	4	24160	gene-KI387_009470
GO:0043190	ATP-binding cassette (ABC) transporter complex	cellular_component	0.39893	1	1	2861	5	24160	gene-KI387_001044
GO:0006352	DNA-templated transcription, initiation	biological_process	0.40027	1	21	2861	171	24160	gene-KI387_019194,Novel02565,gene-KI387_001578,Novel02886,Novel07508,gene-KI387_023475,gene-KI387_014286,gene-KI387_011802,gene-KI387_002989,gene-KI387_035130,Novel03834,gene-KI387_031529,gene-KI387_041113,gene-KI387_028432,gene-KI387_013224,gene-KI387_014278,Novel02662,gene-KI387_025069,gene-KI387_002988,gene-KI387_036740,gene-KI387_016311
GO:0060089	molecular transducer activity	molecular_function	0.4004	1	18	2861	120	24160	gene-KI387_002062,Novel05012,gene-KI387_031011,gene-KI387_033177,gene-KI387_035338,gene-KI387_015386,gene-KI387_041763,gene-KI387_022318,gene-KI387_029453,gene-KI387_015382,gene-KI387_018969,gene-KI387_035341,gene-KI387_021443,gene-KI387_030371,gene-KI387_000413,gene-KI387_019181,gene-KI387_010355,gene-KI387_034145
GO:0006313	transposition, DNA-mediated	biological_process	0.40157	1	6	2861	53	24160	Novel07201,gene-KI387_035566,gene-KI387_015082,gene-KI387_029371,gene-KI387_022549,gene-KI387_020289
GO:0032196	transposition	biological_process	0.40157	1	6	2861	53	24160	gene-KI387_022549,gene-KI387_020289,gene-KI387_015082,gene-KI387_029371,gene-KI387_035566,Novel07201
GO:1990204	oxidoreductase complex	cellular_component	0.40185	1	6	2861	43	24160	gene-KI387_033419,gene-KI387_023678,gene-KI387_031000,gene-KI387_014403,gene-KI387_023931,gene-KI387_036372
GO:0007034	vacuolar transport	biological_process	0.4019	1	4	2861	28	24160	gene-KI387_019789,gene-KI387_011898,Novel05969,gene-KI387_035886
GO:0042546	cell wall biogenesis	biological_process	0.40203	1	3	2861	17	24160	gene-KI387_009338,gene-KI387_030199,gene-KI387_031520
GO:0016860	intramolecular oxidoreductase activity	molecular_function	0.40237	1	5	2861	36	24160	gene-KI387_016264,gene-KI387_022335,Novel04482,gene-KI387_035478,gene-KI387_019194
GO:0010468	regulation of gene expression	biological_process	0.40274	1	245	2861	1881	24160	gene-KI387_015337,gene-KI387_016525,Novel02498,gene-KI387_001148,gene-KI387_019276,gene-KI387_000483,Novel05882,gene-KI387_001747,gene-KI387_007873,gene-KI387_006267,gene-KI387_019178,gene-KI387_035952,gene-KI387_037852,gene-KI387_004945,gene-KI387_031421,gene-KI387_029371,gene-KI387_011802,gene-KI387_015067,gene-KI387_010785,Novel01680,gene-KI387_015188,Novel03665,gene-KI387_033567,gene-KI387_01…
GO:0046540	U4/U6 x U5 tri-snRNP complex	cellular_component	0.40327	1	1	2861	6	24160	gene-KI387_000026
GO:0097526	spliceosomal tri-snRNP complex	cellular_component	0.40327	1	1	2861	6	24160	gene-KI387_000026
GO:0019073	viral DNA genome packaging	biological_process	0.40375	1	3	2861	20	24160	Novel04200,gene-KI387_025078,gene-KI387_032496
GO:0034250	positive regulation of cellular amide metabolic process	biological_process	0.40398	1	1	2861	4	24160	Novel03665
GO:0045727	positive regulation of translation	biological_process	0.40398	1	1	2861	4	24160	Novel03665
GO:0003352	regulation of cilium movement	biological_process	0.40556	1	1	2861	4	24160	Novel00908
GO:0060632	regulation of microtubule-based movement	biological_process	0.40556	1	1	2861	4	24160	Novel00908
GO:0005381	iron ion transmembrane transporter activity	molecular_function	0.40577	1	2	2861	9	24160	gene-KI387_037724,Novel07197
GO:0009311	oligosaccharide metabolic process	biological_process	0.40657	1	13	2861	89	24160	gene-KI387_023610,gene-KI387_006791,gene-KI387_024368,gene-KI387_039361,gene-KI387_026381,gene-KI387_012559,Novel04174,Novel02995,gene-KI387_012562,gene-KI387_019517,gene-KI387_008045,gene-KI387_002763,gene-KI387_032496
GO:0004057	arginyltransferase activity	molecular_function	0.40828	1	1	2861	3	24160	gene-KI387_024903
GO:0016598	protein arginylation	biological_process	0.40828	1	1	2861	3	24160	gene-KI387_024903
GO:0007399	nervous system development	biological_process	0.40831	1	3	2861	19	24160	gene-KI387_013946,gene-KI387_026490,Novel03431
GO:0052126	movement in host environment	biological_process	0.40867	1	11	2861	89	24160	Novel04072,gene-KI387_008394,Novel00988,gene-KI387_039451,Novel06197,Novel05763,Novel03232,gene-KI387_013495,gene-KI387_006774,gene-KI387_010283,Novel03286
GO:0016763	transferase activity, transferring pentosyl groups	molecular_function	0.40881	1	7	2861	47	24160	gene-KI387_018388,gene-KI387_004589,Novel07208,Novel02060,Novel02360,gene-KI387_018777,gene-KI387_010154
GO:0006813	potassium ion transport	biological_process	0.409	1	20	2861	144	24160	gene-KI387_029517,Novel04058,gene-KI387_014652,gene-KI387_015726,gene-KI387_038094,gene-KI387_015725,gene-KI387_014599,gene-KI387_030440,gene-KI387_011579,gene-KI387_009072,gene-KI387_022986,gene-KI387_034152,gene-KI387_023574,gene-KI387_009073,gene-KI387_019866,gene-KI387_011577,gene-KI387_038993,gene-KI387_008450,gene-KI387_004834,gene-KI387_020140
GO:0007096	regulation of exit from mitosis	biological_process	0.40958	1	1	2861	3	24160	gene-KI387_013946
GO:0010458	exit from mitosis	biological_process	0.40958	1	1	2861	3	24160	gene-KI387_013946
GO:0043044	ATP-dependent chromatin remodeling	biological_process	0.41033	1	3	2861	17	24160	Novel03044,gene-KI387_039089,gene-KI387_021515
GO:0031023	microtubule organizing center organization	biological_process	0.4115	1	2	2861	14	24160	gene-KI387_008605,gene-KI387_002957
GO:0090305	nucleic acid phosphodiester bond hydrolysis	biological_process	0.41355	1	3	2861	21	24160	Novel03887,gene-KI387_035372,Novel07201
GO:0005637	nuclear inner membrane	cellular_component	0.41424	1	1	2861	6	24160	Novel03901
GO:0005639	integral component of nuclear inner membrane	cellular_component	0.41424	1	1	2861	6	24160	Novel03901
GO:0031229	intrinsic component of nuclear inner membrane	cellular_component	0.41424	1	1	2861	6	24160	Novel03901
GO:0042025	host cell nucleus	cellular_component	0.41445	1	29	2861	223	24160	gene-KI387_032240,gene-KI387_031888,gene-KI387_000234,gene-KI387_010283,gene-KI387_008827,gene-KI387_016654,gene-KI387_002426,gene-KI387_023722,gene-KI387_015672,gene-KI387_037906,gene-KI387_022830,gene-KI387_021948,gene-KI387_022919,gene-KI387_013326,gene-KI387_024600,gene-KI387_031285,gene-KI387_043920,Novel02313,Novel00314,gene-KI387_023509,gene-KI387_026804,Novel01029,gene-KI387_020471,gene-K…
GO:0019888	protein phosphatase regulator activity	molecular_function	0.41448	1	6	2861	38	24160	gene-KI387_020471,gene-KI387_025662,Novel03833,gene-KI387_017389,gene-KI387_038128,Novel07508
GO:0004714	transmembrane receptor protein tyrosine kinase activity	molecular_function	0.41449	1	1	2861	3	24160	gene-KI387_010355
GO:0009913	epidermal cell differentiation	biological_process	0.41479	1	1	2861	4	24160	Novel01910
GO:0030216	keratinocyte differentiation	biological_process	0.41479	1	1	2861	4	24160	Novel01910
GO:0043588	skin development	biological_process	0.41479	1	1	2861	4	24160	Novel01910
GO:0005245	voltage-gated calcium channel activity	molecular_function	0.41479	1	1	2861	4	24160	gene-KI387_023507
GO:0003917	DNA topoisomerase type I (single strand cut, ATP-independent) activity	molecular_function	0.4152	1	2	2861	11	24160	Novel00556,gene-KI387_010241
GO:0010639	negative regulation of organelle organization	biological_process	0.41537	1	4	2861	29	24160	gene-KI387_013606,gene-KI387_015278,gene-KI387_018108,gene-KI387_026648
GO:0000469	cleavage involved in rRNA processing	biological_process	0.41678	1	1	2861	5	24160	Novel03887
GO:0090501	RNA phosphodiester bond hydrolysis	biological_process	0.41678	1	1	2861	5	24160	Novel03887
GO:0004559	alpha-mannosidase activity	molecular_function	0.41711	1	4	2861	24	24160	Novel02291,gene-KI387_032579,gene-KI387_032582,gene-KI387_032581
GO:0015923	mannosidase activity	molecular_function	0.41711	1	4	2861	24	24160	gene-KI387_032579,gene-KI387_032582,Novel02291,gene-KI387_032581
GO:0019082	viral protein processing	biological_process	0.41726	1	3	2861	22	24160	gene-KI387_029908,Novel02096,gene-KI387_025236
GO:0001765	membrane raft assembly	biological_process	0.41839	1	1	2861	4	24160	gene-KI387_006085
GO:0031579	membrane raft organization	biological_process	0.41839	1	1	2861	4	24160	gene-KI387_006085
GO:0044091	membrane biogenesis	biological_process	0.41839	1	1	2861	4	24160	gene-KI387_006085
GO:0044854	plasma membrane raft assembly	biological_process	0.41839	1	1	2861	4	24160	gene-KI387_006085
GO:0044857	plasma membrane raft organization	biological_process	0.41839	1	1	2861	4	24160	gene-KI387_006085
GO:0070836	caveola assembly	biological_process	0.41839	1	1	2861	4	24160	gene-KI387_006085
GO:0071709	membrane assembly	biological_process	0.41839	1	1	2861	4	24160	gene-KI387_006085
GO:0048856	anatomical structure development	biological_process	0.41855	1	35	2861	271	24160	gene-KI387_039488,gene-KI387_026504,gene-KI387_020656,gene-KI387_024903,gene-KI387_000234,gene-KI387_012666,gene-KI387_022303,gene-KI387_015386,gene-KI387_003034,Novel02989,gene-KI387_017214,Novel02153,gene-KI387_031775,gene-KI387_014109,gene-KI387_021300,gene-KI387_023225,gene-KI387_024352,gene-KI387_036255,gene-KI387_013946,Novel00389,gene-KI387_015382,gene-KI387_023574,gene-KI387_005045,Novel0…
GO:0005484	SNAP receptor activity	molecular_function	0.41864	1	2	2861	11	24160	gene-KI387_011898,gene-KI387_015119
GO:0090575	RNA polymerase II transcription regulator complex	cellular_component	0.41893	1	9	2861	66	24160	Novel02662,gene-KI387_001302,gene-KI387_006717,gene-KI387_014278,gene-KI387_014286,Novel02730,gene-KI387_001578,gene-KI387_026122,Novel02886
GO:0045995	regulation of embryonic development	biological_process	0.41958	1	2	2861	10	24160	gene-KI387_015750,gene-KI387_033088
GO:0009295	nucleoid	cellular_component	0.42003	1	1	2861	4	24160	gene-KI387_033085
GO:0016796	exonuclease activity, active with either ribo- or deoxyribonucleic acids and producing 5-phosphomonoesters	molecular_function	0.42005	1	12	2861	84	24160	gene-KI387_021000,gene-KI387_026959,gene-KI387_034994,gene-KI387_005814,gene-KI387_016802,gene-KI387_002882,gene-KI387_026729,gene-KI387_005255,gene-KI387_015456,gene-KI387_014886,gene-KI387_028107,gene-KI387_025960
GO:0005795	Golgi stack	cellular_component	0.42023	1	1	2861	4	24160	gene-KI387_024368
GO:0005868	cytoplasmic dynein complex	cellular_component	0.42078	1	1	2861	4	24160	Novel02028
GO:0007015	actin filament organization	biological_process	0.42207	1	4	2861	31	24160	gene-KI387_025940,gene-KI387_015278,gene-KI387_018108,gene-KI387_026648
GO:0008375	acetylglucosaminyltransferase activity	molecular_function	0.4231	1	4	2861	26	24160	Novel01393,Novel02647,gene-KI387_024368,Novel06027
GO:0000176	nuclear exosome (RNase complex)	cellular_component	0.42366	1	2	2861	13	24160	gene-KI387_038579,Novel07386
GO:0004725	protein tyrosine phosphatase activity	molecular_function	0.42414	1	5	2861	30	24160	gene-KI387_014494,Novel04010,Novel07598,gene-KI387_032563,Novel05014
GO:0051011	microtubule minus-end binding	molecular_function	0.42434	1	2	2861	10	24160	Novel06199,gene-KI387_011090
GO:1905354	exoribonuclease complex	cellular_component	0.42592	1	3	2861	21	24160	gene-KI387_022996,Novel07386,gene-KI387_038579
GO:0004129	cytochrome-c oxidase activity	molecular_function	0.42613	1	7	2861	50	24160	gene-KI387_009892,Novel01759,gene-KI387_026091,gene-KI387_012544,gene-KI387_035815,Novel06611,gene-KI387_001423
GO:0016675	oxidoreductase activity, acting on a heme group of donors	molecular_function	0.42613	1	7	2861	50	24160	gene-KI387_026091,gene-KI387_012544,gene-KI387_035815,Novel06611,gene-KI387_001423,gene-KI387_009892,Novel01759
GO:0016676	oxidoreductase activity, acting on a heme group of donors, oxygen as acceptor	molecular_function	0.42613	1	7	2861	50	24160	Novel01759,gene-KI387_009892,gene-KI387_001423,Novel06611,gene-KI387_012544,gene-KI387_026091,gene-KI387_035815
GO:0003690	double-stranded DNA binding	molecular_function	0.42717	1	16	2861	111	24160	Novel02996,Novel03826,Novel00504,Novel07054,gene-KI387_026644,Novel02499,Novel02501,gene-KI387_021893,Novel03317,gene-KI387_015168,gene-KI387_001386,gene-KI387_001385,Novel02498,Novel02309,Novel00104,gene-KI387_026959
GO:0032324	molybdopterin cofactor biosynthetic process	biological_process	0.42739	1	1	2861	4	24160	gene-KI387_031407
GO:0008320	protein transmembrane transporter activity	molecular_function	0.42773	1	1	2861	5	24160	gene-KI387_033462
GO:0140318	protein transporter activity	molecular_function	0.42773	1	1	2861	5	24160	gene-KI387_033462
GO:0000777	condensed chromosome kinetochore	cellular_component	0.42821	1	9	2861	76	24160	gene-KI387_019655,gene-KI387_025626,gene-KI387_042546,gene-KI387_000696,gene-KI387_000228,gene-KI387_015120,gene-KI387_034863,gene-KI387_000695,gene-KI387_023468
GO:0000779	condensed chromosome, centromeric region	cellular_component	0.42821	1	9	2861	76	24160	gene-KI387_025626,gene-KI387_042546,gene-KI387_000696,gene-KI387_019655,gene-KI387_023468,gene-KI387_000695,gene-KI387_015120,gene-KI387_000228,gene-KI387_034863
GO:0014070	response to organic cyclic compound	biological_process	0.42829	1	3	2861	21	24160	Novel04360,gene-KI387_027035,gene-KI387_020416
GO:0071407	cellular response to organic cyclic compound	biological_process	0.42829	1	3	2861	21	24160	Novel04360,gene-KI387_027035,gene-KI387_020416
GO:1901606	alpha-amino acid catabolic process	biological_process	0.42831	1	4	2861	26	24160	gene-KI387_026926,gene-KI387_040659,Novel04517,gene-KI387_010648
GO:0009847	spore germination	biological_process	0.42865	1	2	2861	11	24160	gene-KI387_023418,gene-KI387_032245
GO:0033647	host intracellular organelle	cellular_component	0.4287	1	29	2861	224	24160	gene-KI387_017956,Novel03889,gene-KI387_017214,gene-KI387_020471,gene-KI387_000035,gene-KI387_003034,Novel01029,gene-KI387_008829,gene-KI387_026804,gene-KI387_023509,Novel02313,Novel00314,gene-KI387_031285,gene-KI387_043920,gene-KI387_022919,gene-KI387_021948,gene-KI387_024600,gene-KI387_013326,gene-KI387_016654,gene-KI387_002426,gene-KI387_022830,gene-KI387_023722,gene-KI387_015672,gene-KI387_03…
GO:0033648	host intracellular membrane-bounded organelle	cellular_component	0.4287	1	29	2861	224	24160	gene-KI387_008829,gene-KI387_000035,gene-KI387_020471,gene-KI387_017214,gene-KI387_003034,Novel01029,gene-KI387_017956,Novel03889,gene-KI387_023509,Novel00314,Novel02313,gene-KI387_026804,gene-KI387_024600,gene-KI387_013326,gene-KI387_022919,gene-KI387_021948,gene-KI387_043920,gene-KI387_031285,gene-KI387_008827,gene-KI387_010283,gene-KI387_000234,gene-KI387_032240,gene-KI387_031888,gene-KI387_02…
GO:0006874	cellular calcium ion homeostasis	biological_process	0.42944	1	5	2861	39	24160	gene-KI387_005247,gene-KI387_025376,Novel06197,gene-KI387_033736,gene-KI387_033175
GO:0055074	calcium ion homeostasis	biological_process	0.42944	1	5	2861	39	24160	gene-KI387_033175,gene-KI387_033736,Novel06197,gene-KI387_005247,gene-KI387_025376
GO:0072503	cellular divalent inorganic cation homeostasis	biological_process	0.42944	1	5	2861	39	24160	gene-KI387_033175,gene-KI387_033736,gene-KI387_025376,gene-KI387_005247,Novel06197
GO:0072507	divalent inorganic cation homeostasis	biological_process	0.42944	1	5	2861	39	24160	gene-KI387_025376,gene-KI387_005247,Novel06197,gene-KI387_033736,gene-KI387_033175
GO:0005929	cilium	cellular_component	0.43	1	8	2861	55	24160	Novel02313,gene-KI387_020056,gene-KI387_025607,gene-KI387_000228,Novel02515,gene-KI387_019866,gene-KI387_034738,gene-KI387_030434
GO:0031123	RNA 3-end processing	biological_process	0.43062	1	3	2861	18	24160	gene-KI387_028019,gene-KI387_010266,gene-KI387_003569
GO:0008028	monocarboxylic acid transmembrane transporter activity	molecular_function	0.43122	1	1	2861	4	24160	gene-KI387_005704
GO:0009894	regulation of catabolic process	biological_process	0.43132	1	3	2861	19	24160	gene-KI387_015068,gene-KI387_006020,gene-KI387_000778
GO:0016743	carboxyl- or carbamoyltransferase activity	molecular_function	0.43227	1	1	2861	5	24160	Novel00854
GO:0036126	sperm flagellum	cellular_component	0.43297	1	1	2861	3	24160	Novel02515
GO:0097228	sperm principal piece	cellular_component	0.43297	1	1	2861	3	24160	Novel02515
GO:0097729	9+2 motile cilium	cellular_component	0.43297	1	1	2861	3	24160	Novel02515
GO:0008443	phosphofructokinase activity	molecular_function	0.43342	1	5	2861	34	24160	gene-KI387_014874,gene-KI387_027932,gene-KI387_027917,gene-KI387_007279,gene-KI387_038659
GO:0004329	formate-tetrahydrofolate ligase activity	molecular_function	0.43386	1	1	2861	4	24160	gene-KI387_043879
GO:0051235	maintenance of location	biological_process	0.43421	1	3	2861	21	24160	gene-KI387_010831,gene-KI387_022929,gene-KI387_025372
GO:0010167	response to nitrate	biological_process	0.43473	1	1	2861	7	24160	gene-KI387_022719
GO:0015706	nitrate transport	biological_process	0.43473	1	1	2861	7	24160	gene-KI387_022719
GO:0003729	mRNA binding	molecular_function	0.43553	1	5	2861	33	24160	gene-KI387_020214,gene-KI387_020237,gene-KI387_032225,Novel02153,gene-KI387_037059
GO:0097367	carbohydrate derivative binding	molecular_function	0.43623	1	454	2861	3307	24160	Novel02515,gene-KI387_035637,gene-KI387_033824,gene-KI387_014639,gene-KI387_035697,gene-KI387_011527,gene-KI387_034155,gene-KI387_043879,gene-KI387_008903,Novel02845,Novel00076,Novel02800,Novel02114,gene-KI387_025266,Novel00262,gene-KI387_022432,Novel06453,gene-KI387_003662,gene-KI387_028478,gene-KI387_021105,Novel03639,gene-KI387_029377,gene-KI387_034225,gene-KI387_024555,gene-KI387_011672,gene-…
GO:0030288	outer membrane-bounded periplasmic space	cellular_component	0.43681	1	1	2861	5	24160	gene-KI387_033671
GO:0042578	phosphoric ester hydrolase activity	molecular_function	0.43702	1	35	2861	248	24160	gene-KI387_032563,gene-KI387_014494,gene-KI387_018707,gene-KI387_005498,gene-KI387_028329,gene-KI387_032739,gene-KI387_016269,gene-KI387_027956,gene-KI387_013319,Novel05014,gene-KI387_007066,gene-KI387_034875,gene-KI387_022307,Novel07598,gene-KI387_016272,gene-KI387_018703,gene-KI387_000175,Novel04010,gene-KI387_022888,gene-KI387_027955,Novel06441,gene-KI387_038993,Novel04312,gene-KI387_002376,ge…
GO:0001534	radial spoke	cellular_component	0.4371	1	1	2861	4	24160	gene-KI387_025607
GO:0005930	axoneme	cellular_component	0.4371	1	1	2861	4	24160	gene-KI387_025607
GO:0032838	plasma membrane bounded cell projection cytoplasm	cellular_component	0.4371	1	1	2861	4	24160	gene-KI387_025607
GO:0060285	cilium-dependent cell motility	biological_process	0.4371	1	1	2861	4	24160	gene-KI387_025607
GO:0060294	cilium movement involved in cell motility	biological_process	0.4371	1	1	2861	4	24160	gene-KI387_025607
GO:0097014	ciliary plasm	cellular_component	0.4371	1	1	2861	4	24160	gene-KI387_025607
GO:0099568	cytoplasmic region	cellular_component	0.4371	1	1	2861	4	24160	gene-KI387_025607
GO:0051495	positive regulation of cytoskeleton organization	biological_process	0.43711	1	2	2861	13	24160	gene-KI387_025940,Novel03044
GO:0004568	chitinase activity	molecular_function	0.43756	1	4	2861	34	24160	gene-KI387_014522,gene-KI387_014524,gene-KI387_019179,gene-KI387_014523
GO:0009968	negative regulation of signal transduction	biological_process	0.43786	1	4	2861	30	24160	gene-KI387_015378,gene-KI387_015382,gene-KI387_030894,gene-KI387_015386
GO:0004864	protein phosphatase inhibitor activity	molecular_function	0.43801	1	2	2861	12	24160	Novel03833,gene-KI387_017389
GO:0019212	phosphatase inhibitor activity	molecular_function	0.43801	1	2	2861	12	24160	Novel03833,gene-KI387_017389
GO:0016833	oxo-acid-lyase activity	molecular_function	0.43812	1	2	2861	11	24160	Novel05967,gene-KI387_022829
GO:0012505	endomembrane system	cellular_component	0.43926	1	64	2861	508	24160	Novel02613,Novel03901,gene-KI387_024131,gene-KI387_040682,gene-KI387_032657,gene-KI387_003034,gene-KI387_020852,gene-KI387_002517,Novel00724,gene-KI387_011898,gene-KI387_010663,gene-KI387_000561,gene-KI387_020721,gene-KI387_037852,gene-KI387_006267,Novel02199,gene-KI387_032243,gene-KI387_018291,Novel01351,gene-KI387_024368,Novel02216,gene-KI387_032682,Novel06492,Novel07508,gene-KI387_017939,gene-…
GO:0003724	RNA helicase activity	molecular_function	0.43941	1	22	2861	146	24160	gene-KI387_031445,gene-KI387_011451,gene-KI387_033747,gene-KI387_021115,gene-KI387_027956,gene-KI387_020169,gene-KI387_015914,gene-KI387_035750,gene-KI387_027955,Novel03044,gene-KI387_001835,Novel03542,gene-KI387_006229,gene-KI387_015919,gene-KI387_018001,gene-KI387_028329,gene-KI387_021105,gene-KI387_019050,gene-KI387_000049,gene-KI387_019448,gene-KI387_032739,gene-KI387_028904
GO:0005261	cation channel activity	molecular_function	0.43956	1	17	2861	135	24160	gene-KI387_019866,Novel06411,gene-KI387_002697,Novel05763,gene-KI387_033175,gene-KI387_025940,gene-KI387_025376,Novel01457,Novel03232,Novel00827,gene-KI387_032296,gene-KI387_023507,Novel02292,gene-KI387_005247,gene-KI387_024034,gene-KI387_036725,gene-KI387_033736
GO:0015171	amino acid transmembrane transporter activity	molecular_function	0.44013	1	2	2861	10	24160	gene-KI387_026642,gene-KI387_018969
GO:0016717	oxidoreductase activity, acting on paired donors, with oxidation of a pair of donors resulting in the reduction of molecular oxygen to two molecules of water	molecular_function	0.44051	1	2	2861	12	24160	gene-KI387_036104,Novel02294
GO:0009755	hormone-mediated signaling pathway	biological_process	0.44057	1	3	2861	20	24160	gene-KI387_020416,gene-KI387_027035,Novel04360
GO:0019725	cellular homeostasis	biological_process	0.44084	1	17	2861	151	24160	gene-KI387_036700,gene-KI387_000026,Novel06197,Novel04005,gene-KI387_006240,gene-KI387_021085,gene-KI387_033175,gene-KI387_025376,gene-KI387_043278,gene-KI387_012988,gene-KI387_024004,gene-KI387_017878,gene-KI387_005247,gene-KI387_017879,gene-KI387_038017,gene-KI387_032987,gene-KI387_033736
GO:0051239	regulation of multicellular organismal process	biological_process	0.44166	1	8	2861	52	24160	gene-KI387_037477,Novel02989,gene-KI387_016269,gene-KI387_015750,Novel03458,Novel04537,Novel03173,gene-KI387_033088
GO:0032553	ribonucleotide binding	molecular_function	0.44217	1	447	2861	3251	24160	Novel00105,gene-KI387_035261,Novel03044,gene-KI387_000780,gene-KI387_004491,Novel04744,gene-KI387_024720,Novel02844,gene-KI387_038818,gene-KI387_032824,gene-KI387_008756,gene-KI387_032737,gene-KI387_033747,gene-KI387_000412,gene-KI387_015115,gene-KI387_029453,gene-KI387_031524,Novel05545,gene-KI387_023779,gene-KI387_043169,Novel00601,Novel05050,Novel06117,gene-KI387_014578,gene-KI387_032732,Novel…
GO:0032784	regulation of DNA-templated transcription, elongation	biological_process	0.44375	1	2	2861	13	24160	gene-KI387_041113,Novel02565
GO:0003847	1-alkyl-2-acetylglycerophosphocholine esterase activity	molecular_function	0.44487	1	1	2861	5	24160	Novel04287
GO:0009271	phage shock	biological_process	0.44502	1	1	2861	5	24160	gene-KI387_026117
GO:0098586	cellular response to virus	biological_process	0.44502	1	1	2861	5	24160	gene-KI387_026117
GO:0004809	tRNA (guanine-N2-)-methyltransferase activity	molecular_function	0.44563	1	1	2861	4	24160	gene-KI387_033744
GO:0000275	mitochondrial proton-transporting ATP synthase complex, catalytic sector F(1)	cellular_component	0.44576	1	3	2861	17	24160	gene-KI387_024034,gene-KI387_012076,Novel01457
GO:0005666	RNA polymerase III complex	cellular_component	0.44624	1	2	2861	16	24160	gene-KI387_005247,gene-KI387_025103
GO:0008430	selenium binding	molecular_function	0.44633	1	1	2861	7	24160	gene-KI387_022302
GO:0008061	chitin binding	molecular_function	0.44651	1	5	2861	37	24160	Novel03720,gene-KI387_027427,gene-KI387_012487,gene-KI387_019445,Novel06768
GO:0120025	plasma membrane bounded cell projection	cellular_component	0.44695	1	8	2861	56	24160	gene-KI387_020056,Novel02313,Novel02515,gene-KI387_025607,gene-KI387_000228,gene-KI387_019866,gene-KI387_034738,gene-KI387_030434
GO:0031324	negative regulation of cellular metabolic process	biological_process	0.44784	1	10	2861	75	24160	gene-KI387_022303,Novel03833,Novel00556,Novel00180,Novel04215,gene-KI387_008144,Novel02501,gene-KI387_010359,Novel00083,gene-KI387_022908
GO:0035639	purine ribonucleoside triphosphate binding	molecular_function	0.44801	1	426	2861	3083	24160	gene-KI387_006676,gene-KI387_023676,Novel05903,gene-KI387_021115,gene-KI387_001050,gene-KI387_013077,gene-KI387_012915,gene-KI387_012099,gene-KI387_022318,gene-KI387_021103,gene-KI387_023399,gene-KI387_022842,gene-KI387_032818,gene-KI387_036395,gene-KI387_032446,gene-KI387_027932,gene-KI387_012643,gene-KI387_010283,gene-KI387_007853,gene-KI387_020747,Novel01893,gene-KI387_033305,gene-KI387_033296…
GO:0016877	ligase activity, forming carbon-sulfur bonds	molecular_function	0.44854	1	5	2861	32	24160	gene-KI387_024848,gene-KI387_019583,gene-KI387_001655,gene-KI387_021019,gene-KI387_029517
GO:0030286	dynein complex	cellular_component	0.44869	1	3	2861	19	24160	Novel03993,Novel01094,Novel02028
GO:0016972	thiol oxidase activity	molecular_function	0.44987	1	2	2861	11	24160	gene-KI387_038993,gene-KI387_009470
GO:0003013	circulatory system process	biological_process	0.45002	1	3	2861	17	24160	Novel02791,Novel03458,gene-KI387_037477
GO:0003018	vascular process in circulatory system	biological_process	0.45002	1	3	2861	17	24160	gene-KI387_037477,Novel03458,Novel02791
GO:0008015	blood circulation	biological_process	0.45002	1	3	2861	17	24160	Novel03458,gene-KI387_037477,Novel02791
GO:0035150	regulation of tube size	biological_process	0.45002	1	3	2861	17	24160	Novel02791,Novel03458,gene-KI387_037477
GO:0035296	regulation of tube diameter	biological_process	0.45002	1	3	2861	17	24160	Novel02791,gene-KI387_037477,Novel03458
GO:0097746	regulation of blood vessel diameter	biological_process	0.45002	1	3	2861	17	24160	Novel03458,gene-KI387_037477,Novel02791
GO:0098657	import into cell	biological_process	0.45045	1	1	2861	5	24160	gene-KI387_025376
GO:0098739	import across plasma membrane	biological_process	0.45045	1	1	2861	5	24160	gene-KI387_025376
GO:0044380	protein localization to cytoskeleton	biological_process	0.45151	1	1	2861	6	24160	gene-KI387_002957
GO:0071988	protein localization to spindle pole body	biological_process	0.45151	1	1	2861	6	24160	gene-KI387_002957
GO:0072698	protein localization to microtubule cytoskeleton	biological_process	0.45151	1	1	2861	6	24160	gene-KI387_002957
GO:1905508	protein localization to microtubule organizing center	biological_process	0.45151	1	1	2861	6	24160	gene-KI387_002957
GO:0010605	negative regulation of macromolecule metabolic process	biological_process	0.45218	1	20	2861	147	24160	gene-KI387_022908,Novel06149,Novel00083,gene-KI387_010359,gene-KI387_037910,Novel03833,Novel02501,gene-KI387_008144,gene-KI387_030903,gene-KI387_022929,gene-KI387_024848,Novel02084,gene-KI387_003795,Novel00556,Novel04351,gene-KI387_019276,gene-KI387_022303,Novel02565,Novel00180,Novel04215
GO:0045048	protein insertion into ER membrane	biological_process	0.45279	1	2	2861	13	24160	gene-KI387_009072,Novel05615
GO:0000747	conjugation with cellular fusion	biological_process	0.45357	1	2	2861	10	24160	Novel05041,Novel04768
GO:0140253	cell-cell fusion	biological_process	0.45357	1	2	2861	10	24160	Novel05041,Novel04768
GO:0005739	mitochondrion	cellular_component	0.45426	1	42	2861	343	24160	Novel04001,gene-KI387_037721,gene-KI387_007444,gene-KI387_009892,gene-KI387_012321,Novel03286,gene-KI387_022989,gene-KI387_021000,gene-KI387_023725,gene-KI387_007107,Novel05784,gene-KI387_025751,gene-KI387_005969,gene-KI387_012076,gene-KI387_023931,gene-KI387_033296,gene-KI387_022317,Novel06611,Novel03665,gene-KI387_036846,Novel06862,gene-KI387_032096,Novel06197,gene-KI387_042546,gene-KI387_02267…
GO:0031975	envelope	cellular_component	0.45597	1	37	2861	297	24160	Novel00554,gene-KI387_002463,Novel01351,gene-KI387_024034,gene-KI387_020416,gene-KI387_020471,gene-KI387_015775,Novel01404,gene-KI387_021916,gene-KI387_007321,gene-KI387_039966,Novel04215,Novel01457,gene-KI387_023358,Novel01759,gene-KI387_042546,Novel06197,gene-KI387_037293,gene-KI387_022676,Novel04857,Novel06611,gene-KI387_035205,gene-KI387_022317,gene-KI387_036846,Novel03665,gene-KI387_012076,g…
GO:0009791	post-embryonic development	biological_process	0.45641	1	1	2861	5	24160	Novel02989
GO:0006106	fumarate metabolic process	biological_process	0.45763	1	1	2861	5	24160	gene-KI387_006893
GO:0035737	injection of substance in to other organism	biological_process	0.45813	1	2	2861	10	24160	gene-KI387_017507,gene-KI387_017508
GO:0035738	envenomation resulting in modulation of process in other organism	biological_process	0.45813	1	2	2861	10	24160	gene-KI387_017508,gene-KI387_017507
GO:0044559	envenomation resulting in modulation of voltage-gated potassium channel activity in other organism	biological_process	0.45813	1	2	2861	10	24160	gene-KI387_017507,gene-KI387_017508
GO:0044560	envenomation resulting in modulation of ion channel activity in other organism	biological_process	0.45813	1	2	2861	10	24160	gene-KI387_017507,gene-KI387_017508
GO:0044562	envenomation resulting in negative regulation of voltage-gated potassium channel activity in other organism	biological_process	0.45813	1	2	2861	10	24160	gene-KI387_017507,gene-KI387_017508
GO:0044564	envenomation resulting in occlusion of the pore of voltage-gated potassium channel in other organism	biological_process	0.45813	1	2	2861	10	24160	gene-KI387_017507,gene-KI387_017508
GO:0030683	mitigation of host immune response by virus	biological_process	0.45833	1	1	2861	4	24160	gene-KI387_033897
GO:0050690	regulation of defense response to virus by virus	biological_process	0.45833	1	1	2861	4	24160	gene-KI387_033897
GO:0003950	NAD+ ADP-ribosyltransferase activity	molecular_function	0.4584	1	4	2861	23	24160	gene-KI387_010154,gene-KI387_018777,Novel07208,gene-KI387_004589
GO:0009262	deoxyribonucleotide metabolic process	biological_process	0.45871	1	1	2861	6	24160	gene-KI387_009470
GO:0001932	regulation of protein phosphorylation	biological_process	0.46005	1	4	2861	27	24160	Novel00381,gene-KI387_003844,gene-KI387_035175,gene-KI387_017703
GO:0004363	glutathione synthase activity	molecular_function	0.46052	1	2	2861	13	24160	Novel01742,gene-KI387_003205
GO:0003747	translation release factor activity	molecular_function	0.46185	1	2	2861	13	24160	gene-KI387_000492,Novel02165
GO:0008079	translation termination factor activity	molecular_function	0.46185	1	2	2861	13	24160	gene-KI387_000492,Novel02165
GO:0099080	supramolecular complex	cellular_component	0.46306	1	19	2861	165	24160	gene-KI387_000696,gene-KI387_025626,gene-KI387_024161,gene-KI387_023468,gene-KI387_003620,gene-KI387_000695,gene-KI387_029453,gene-KI387_041100,Novel04360,gene-KI387_019655,gene-KI387_015766,gene-KI387_018789,gene-KI387_042546,gene-KI387_035995,gene-KI387_037563,gene-KI387_034863,gene-KI387_015120,gene-KI387_029360,gene-KI387_000228
GO:0005669	transcription factor TFIID complex	cellular_component	0.46335	1	3	2861	23	24160	gene-KI387_014286,gene-KI387_014278,Novel02662
GO:0030880	RNA polymerase complex	cellular_component	0.46449	1	11	2861	90	24160	gene-KI387_025103,Novel02662,gene-KI387_030371,gene-KI387_005247,gene-KI387_001578,gene-KI387_035130,Novel02886,gene-KI387_031529,gene-KI387_010824,gene-KI387_014286,gene-KI387_014278
GO:0003008	system process	biological_process	0.46453	1	7	2861	48	24160	Novel02791,Novel04537,gene-KI387_016269,gene-KI387_037477,gene-KI387_022318,gene-KI387_030371,Novel03458
GO:0016586	RSC-type complex	cellular_component	0.4648	1	1	2861	4	24160	Novel03044
GO:0005779	integral component of peroxisomal membrane	cellular_component	0.46609	1	2	2861	13	24160	Novel03446,gene-KI387_011378
GO:0031231	intrinsic component of peroxisomal membrane	cellular_component	0.46609	1	2	2861	13	24160	gene-KI387_011378,Novel03446
GO:0019200	carbohydrate kinase activity	molecular_function	0.46625	1	5	2861	35	24160	gene-KI387_014874,gene-KI387_027917,gene-KI387_007279,gene-KI387_038659,gene-KI387_027932
GO:0016878	acid-thiol ligase activity	molecular_function	0.46635	1	1	2861	5	24160	gene-KI387_019583
GO:0005992	trehalose biosynthetic process	biological_process	0.4685	1	3	2861	18	24160	gene-KI387_023610,Novel02995,Novel04174
GO:0003848	2-amino-4-hydroxy-6-hydroxymethyldihydropteridine diphosphokinase activity	molecular_function	0.47133	1	1	2861	5	24160	Novel00583
GO:0017076	purine nucleotide binding	molecular_function	0.47202	1	440	2861	3200	24160	gene-KI387_011860,gene-KI387_037625,gene-KI387_037661,gene-KI387_034557,gene-KI387_027956,Novel07001,gene-KI387_023200,Novel06746,gene-KI387_015919,gene-KI387_032285,Novel06552,gene-KI387_025960,Novel05534,gene-KI387_035340,gene-KI387_032563,gene-KI387_026770,gene-KI387_034280,gene-KI387_015013,gene-KI387_028329,gene-KI387_000228,gene-KI387_022964,Novel00252,gene-KI387_010126,gene-KI387_008844,ge…
GO:0098656	anion transmembrane transport	biological_process	0.47324	1	5	2861	38	24160	gene-KI387_005704,gene-KI387_027183,gene-KI387_014560,gene-KI387_015775,Novel04001
GO:0016569	covalent chromatin modification	biological_process	0.47336	1	9	2861	56	24160	gene-KI387_030371,gene-KI387_019866,gene-KI387_009072,Novel04181,gene-KI387_031884,gene-KI387_012099,gene-KI387_030667,gene-KI387_010824,gene-KI387_023200
GO:0016570	histone modification	biological_process	0.47336	1	9	2861	56	24160	gene-KI387_012099,gene-KI387_031884,gene-KI387_030667,gene-KI387_010824,gene-KI387_023200,gene-KI387_030371,gene-KI387_019866,gene-KI387_009072,Novel04181
GO:0046434	organophosphate catabolic process	biological_process	0.47344	1	5	2861	40	24160	Novel03646,gene-KI387_005875,Novel06827,gene-KI387_001502,gene-KI387_008361
GO:0033043	regulation of organelle organization	biological_process	0.47428	1	8	2861	60	24160	Novel05638,Novel03044,gene-KI387_015278,gene-KI387_013946,gene-KI387_026648,gene-KI387_018108,gene-KI387_013606,gene-KI387_025940
GO:0004367	glycerol-3-phosphate dehydrogenase [NAD+] activity	molecular_function	0.47445	1	1	2861	4	24160	Novel06827
GO:0047952	glycerol-3-phosphate dehydrogenase [NAD(P)+] activity	molecular_function	0.47445	1	1	2861	4	24160	Novel06827
GO:0045047	protein targeting to ER	biological_process	0.47457	1	11	2861	82	24160	gene-KI387_018291,gene-KI387_002012,gene-KI387_035637,gene-KI387_027956,gene-KI387_005548,gene-KI387_001527,gene-KI387_033192,gene-KI387_021013,gene-KI387_016272,gene-KI387_036854,gene-KI387_012544
GO:0072599	establishment of protein localization to endoplasmic reticulum	biological_process	0.47457	1	11	2861	82	24160	gene-KI387_005548,gene-KI387_027956,gene-KI387_002012,gene-KI387_035637,gene-KI387_018291,gene-KI387_036854,gene-KI387_012544,gene-KI387_016272,gene-KI387_033192,gene-KI387_021013,gene-KI387_001527
GO:0047869	dimethylpropiothetin dethiomethylase activity	molecular_function	0.47532	1	1	2861	6	24160	Novel05969
GO:0006851	mitochondrial calcium ion transmembrane transport	biological_process	0.47545	1	1	2861	6	24160	Novel06197
GO:0036444	calcium import into the mitochondrion	biological_process	0.47545	1	1	2861	6	24160	Novel06197
GO:0051560	mitochondrial calcium ion homeostasis	biological_process	0.47545	1	1	2861	6	24160	Novel06197
GO:1990246	uniplex complex	cellular_component	0.47545	1	1	2861	6	24160	Novel06197
GO:0000775	chromosome, centromeric region	cellular_component	0.47554	1	21	2861	179	24160	Novel06055,Novel02576,Novel04836,gene-KI387_000695,gene-KI387_003620,gene-KI387_023468,gene-KI387_010266,gene-KI387_023728,gene-KI387_000696,gene-KI387_025626,gene-KI387_024161,Novel01067,gene-KI387_034863,gene-KI387_015120,gene-KI387_000228,Novel04360,gene-KI387_019655,gene-KI387_018789,gene-KI387_042546,gene-KI387_035995,gene-KI387_037563
GO:0042176	regulation of protein catabolic process	biological_process	0.47567	1	1	2861	5	24160	gene-KI387_000778
GO:0003980	UDP-glucose:glycoprotein glucosyltransferase activity	molecular_function	0.4766	1	1	2861	5	24160	Novel00663
GO:0000813	ESCRT I complex	cellular_component	0.47815	1	1	2861	4	24160	Novel02448
GO:0005247	voltage-gated chloride channel activity	molecular_function	0.47836	1	3	2861	18	24160	Novel01258,gene-KI387_014593,gene-KI387_008890
GO:0005254	chloride channel activity	molecular_function	0.47836	1	3	2861	18	24160	Novel01258,gene-KI387_014593,gene-KI387_008890
GO:0008308	voltage-gated anion channel activity	molecular_function	0.47836	1	3	2861	18	24160	Novel01258,gene-KI387_008890,gene-KI387_014593
GO:0004347	glucose-6-phosphate isomerase activity	molecular_function	0.47848	1	1	2861	6	24160	gene-KI387_016264
GO:0006418	tRNA aminoacylation for protein translation	biological_process	0.47921	1	15	2861	108	24160	gene-KI387_025157,gene-KI387_014733,Novel06058,gene-KI387_035795,gene-KI387_023779,gene-KI387_008045,gene-KI387_017606,Novel00820,Novel05363,gene-KI387_033216,gene-KI387_009501,Novel02886,gene-KI387_024913,Novel07127,Novel02670
GO:0010648	negative regulation of cell communication	biological_process	0.47981	1	4	2861	32	24160	gene-KI387_015382,gene-KI387_015378,gene-KI387_015386,gene-KI387_030894
GO:0023057	negative regulation of signaling	biological_process	0.47981	1	4	2861	32	24160	gene-KI387_015386,gene-KI387_030894,gene-KI387_015378,gene-KI387_015382
GO:0032870	cellular response to hormone stimulus	biological_process	0.47998	1	3	2861	21	24160	gene-KI387_020416,gene-KI387_027035,Novel04360
GO:1904949	ATPase complex	cellular_component	0.48049	1	2	2861	12	24160	Novel03044,gene-KI387_008890
GO:0006534	cysteine metabolic process	biological_process	0.48082	1	4	2861	24	24160	Novel03215,gene-KI387_031955,gene-KI387_001477,gene-KI387_032838
GO:0030155	regulation of cell adhesion	biological_process	0.48296	1	2	2861	11	24160	gene-KI387_033088,gene-KI387_015750
GO:0000178	exosome (RNase complex)	cellular_component	0.48311	1	2	2861	15	24160	Novel07386,gene-KI387_038579
GO:0006026	aminoglycan catabolic process	biological_process	0.48352	1	6	2861	52	24160	gene-KI387_020640,gene-KI387_014522,gene-KI387_019179,gene-KI387_014523,gene-KI387_014524,gene-KI387_027427
GO:0006032	chitin catabolic process	biological_process	0.48387	1	5	2861	42	24160	gene-KI387_014523,gene-KI387_019179,gene-KI387_014524,gene-KI387_027427,gene-KI387_014522
GO:0046348	amino sugar catabolic process	biological_process	0.48387	1	5	2861	42	24160	gene-KI387_027427,gene-KI387_014524,gene-KI387_019179,gene-KI387_014523,gene-KI387_014522
GO:1901072	glucosamine-containing compound catabolic process	biological_process	0.48387	1	5	2861	42	24160	gene-KI387_014522,gene-KI387_014524,gene-KI387_027427,gene-KI387_019179,gene-KI387_014523
GO:0005342	organic acid transmembrane transporter activity	molecular_function	0.48424	1	3	2861	20	24160	gene-KI387_018969,gene-KI387_005704,gene-KI387_026642
GO:0046943	carboxylic acid transmembrane transporter activity	molecular_function	0.48424	1	3	2861	20	24160	gene-KI387_026642,gene-KI387_005704,gene-KI387_018969
GO:0019104	DNA N-glycosylase activity	molecular_function	0.48543	1	2	2861	13	24160	Novel06724,gene-KI387_015529
GO:0009318	exodeoxyribonuclease VII complex	cellular_component	0.48543	1	1	2861	5	24160	gene-KI387_026959
GO:0140110	transcription regulator activity	molecular_function	0.48564	1	87	2861	742	24160	gene-KI387_032302,gene-KI387_000483,gene-KI387_002313,gene-KI387_000228,gene-KI387_015337,gene-KI387_001148,gene-KI387_011802,gene-KI387_034375,Novel01680,gene-KI387_037852,gene-KI387_004945,gene-KI387_034376,gene-KI387_033567,gene-KI387_014541,gene-KI387_016802,Novel01591,gene-KI387_012166,gene-KI387_016311,Novel07077,gene-KI387_019594,gene-KI387_001644,gene-KI387_027350,gene-KI387_025476,Novel0…
GO:0019076	viral release from host cell	biological_process	0.48616	1	5	2861	42	24160	gene-KI387_006774,Novel03232,gene-KI387_013495,Novel03286,gene-KI387_010283
GO:0035890	exit from host	biological_process	0.48616	1	5	2861	42	24160	gene-KI387_006774,gene-KI387_013495,Novel03232,Novel03286,gene-KI387_010283
GO:0035891	exit from host cell	biological_process	0.48616	1	5	2861	42	24160	Novel03286,gene-KI387_010283,gene-KI387_006774,Novel03232,gene-KI387_013495
GO:0097435	supramolecular fiber organization	biological_process	0.48668	1	4	2861	33	24160	gene-KI387_018108,gene-KI387_026648,gene-KI387_015278,gene-KI387_025940
GO:0006275	regulation of DNA replication	biological_process	0.48684	1	3	2861	21	24160	gene-KI387_027179,gene-KI387_037640,gene-KI387_031285
GO:0005816	spindle pole body	cellular_component	0.48723	1	1	2861	4	24160	gene-KI387_008605
GO:0005823	central plaque of spindle pole body	cellular_component	0.48723	1	1	2861	4	24160	gene-KI387_008605
GO:0010506	regulation of autophagy	biological_process	0.48754	1	2	2861	13	24160	gene-KI387_015068,gene-KI387_006020
GO:0050145	nucleoside monophosphate kinase activity	molecular_function	0.48757	1	6	2861	41	24160	Novel03542,gene-KI387_000049,gene-KI387_038045,gene-KI387_025622,gene-KI387_011451,gene-KI387_006189
GO:0016407	acetyltransferase activity	molecular_function	0.48778	1	11	2861	79	24160	Novel05471,Novel05882,gene-KI387_026802,Novel01823,gene-KI387_022806,gene-KI387_016067,gene-KI387_037287,gene-KI387_002517,Novel04243,gene-KI387_002529,gene-KI387_032314
GO:1990904	ribonucleoprotein complex	cellular_component	0.48813	1	18	2861	148	24160	gene-KI387_020214,gene-KI387_018569,gene-KI387_031942,gene-KI387_020237,Novel07508,gene-KI387_007517,gene-KI387_005724,gene-KI387_003855,gene-KI387_021515,gene-KI387_000026,Novel01373,Novel04098,gene-KI387_005360,gene-KI387_032225,Novel06149,gene-KI387_033296,gene-KI387_020524,gene-KI387_028836
GO:0016892	endoribonuclease activity, producing 3-phosphomonoesters	molecular_function	0.48919	1	2	2861	14	24160	gene-KI387_034521,gene-KI387_034526
GO:0006891	intra-Golgi vesicle-mediated transport	biological_process	0.48982	1	5	2861	39	24160	gene-KI387_042546,Novel03380,gene-KI387_011898,gene-KI387_038813,Novel02505
GO:0005635	nuclear envelope	cellular_component	0.49005	1	5	2861	37	24160	gene-KI387_039261,Novel04857,Novel01351,Novel03901,gene-KI387_037293
GO:0016410	N-acyltransferase activity	molecular_function	0.49282	1	11	2861	81	24160	Novel06397,gene-KI387_032314,gene-KI387_026802,Novel05471,Novel05882,gene-KI387_016067,gene-KI387_022806,gene-KI387_037287,gene-KI387_006164,gene-KI387_004196,Novel01823
GO:0005801	cis-Golgi network	cellular_component	0.49422	1	3	2861	21	24160	gene-KI387_038813,gene-KI387_017939,gene-KI387_009618
GO:0017062	respiratory chain complex III assembly	biological_process	0.49479	1	1	2861	7	24160	Novel03150
GO:0034551	mitochondrial respiratory chain complex III assembly	biological_process	0.49479	1	1	2861	7	24160	Novel03150
GO:0005794	Golgi apparatus	cellular_component	0.49542	1	14	2861	111	24160	Novel03380,gene-KI387_006267,gene-KI387_042546,gene-KI387_024131,Novel02505,gene-KI387_015119,gene-KI387_010663,gene-KI387_013376,gene-KI387_011898,gene-KI387_017939,gene-KI387_009618,gene-KI387_024368,gene-KI387_038813,Novel06492
GO:0048193	Golgi vesicle transport	biological_process	0.49626	1	21	2861	169	24160	Novel03380,Novel05114,gene-KI387_005255,gene-KI387_042546,gene-KI387_029452,gene-KI387_020721,gene-KI387_011898,gene-KI387_000561,Novel03486,gene-KI387_038813,gene-KI387_003034,gene-KI387_000035,Novel04529,gene-KI387_019594,Novel02505,Novel06749,gene-KI387_014787,gene-KI387_025078,gene-KI387_015119,gene-KI387_012566,gene-KI387_020360
GO:0061687	detoxification of inorganic compound	biological_process	0.4974	1	3	2861	21	24160	gene-KI387_037459,gene-KI387_014558,gene-KI387_029421
GO:0032555	purine ribonucleotide binding	molecular_function	0.49809	1	437	2861	3184	24160	gene-KI387_020571,gene-KI387_031655,gene-KI387_005671,gene-KI387_033190,gene-KI387_039068,gene-KI387_008188,gene-KI387_017807,gene-KI387_029015,gene-KI387_001644,gene-KI387_026959,gene-KI387_035806,gene-KI387_033474,gene-KI387_032906,gene-KI387_000049,gene-KI387_010359,gene-KI387_035519,gene-KI387_035833,gene-KI387_012040,Novel00838,gene-KI387_034817,gene-KI387_012326,gene-KI387_016973,gene-KI387…
GO:0001510	RNA methylation	biological_process	0.49824	1	6	2861	43	24160	gene-KI387_033744,Novel06441,gene-KI387_032349,gene-KI387_038727,gene-KI387_037852,gene-KI387_010975
GO:0010638	positive regulation of organelle organization	biological_process	0.49873	1	2	2861	14	24160	gene-KI387_025940,Novel03044
GO:0007080	mitotic metaphase plate congression	biological_process	0.49978	1	1	2861	5	24160	gene-KI387_018789
GO:0050000	chromosome localization	biological_process	0.49978	1	1	2861	5	24160	gene-KI387_018789
GO:0051303	establishment of chromosome localization	biological_process	0.49978	1	1	2861	5	24160	gene-KI387_018789
GO:0051310	metaphase plate congression	biological_process	0.49978	1	1	2861	5	24160	gene-KI387_018789
GO:0051315	attachment of mitotic spindle microtubules to kinetochore	biological_process	0.49978	1	1	2861	5	24160	gene-KI387_018789
GO:0046983	protein dimerization activity	molecular_function	0.50015	1	51	2861	419	24160	gene-KI387_004093,Novel02886,gene-KI387_038727,gene-KI387_020056,gene-KI387_024881,gene-KI387_024975,gene-KI387_037852,gene-KI387_014277,gene-KI387_028198,Novel05896,gene-KI387_019041,gene-KI387_023242,gene-KI387_019312,gene-KI387_019427,gene-KI387_017380,Novel03031,gene-KI387_016802,gene-KI387_002185,gene-KI387_037910,gene-KI387_012843,gene-KI387_007570,gene-KI387_018283,gene-KI387_019279,Novel0…
GO:0044038	cell wall macromolecule biosynthetic process	biological_process	0.50017	1	1	2861	5	24160	gene-KI387_009338
GO:0070589	cellular component macromolecule biosynthetic process	biological_process	0.50017	1	1	2861	5	24160	gene-KI387_009338
GO:0030030	cell projection organization	biological_process	0.50063	1	8	2861	64	24160	gene-KI387_025607,Novel07508,Novel00067,Novel02313,gene-KI387_026490,Novel03431,gene-KI387_019866,gene-KI387_013946
GO:0015562	efflux transmembrane transporter activity	molecular_function	0.5012	1	1	2861	5	24160	gene-KI387_005814
GO:0000981	DNA-binding transcription factor activity, RNA polymerase II-specific	molecular_function	0.50213	1	3	2861	24	24160	gene-KI387_020416,gene-KI387_027035,Novel04360
GO:0019229	regulation of vasoconstriction	biological_process	0.50231	1	2	2861	11	24160	gene-KI387_037477,Novel03458
GO:0042310	vasoconstriction	biological_process	0.50231	1	2	2861	11	24160	Novel03458,gene-KI387_037477
GO:0097756	negative regulation of blood vessel diameter	biological_process	0.50231	1	2	2861	11	24160	gene-KI387_037477,Novel03458
GO:1903522	regulation of blood circulation	biological_process	0.50231	1	2	2861	11	24160	gene-KI387_037477,Novel03458
GO:0001503	ossification	biological_process	0.50274	1	2	2861	16	24160	gene-KI387_012321,Novel07508
GO:0055088	lipid homeostasis	biological_process	0.50275	1	1	2861	6	24160	Novel04857
GO:0070972	protein localization to endoplasmic reticulum	biological_process	0.50345	1	12	2861	92	24160	gene-KI387_005548,gene-KI387_027956,gene-KI387_010831,gene-KI387_002012,gene-KI387_035637,gene-KI387_018291,gene-KI387_036854,gene-KI387_012544,gene-KI387_016272,gene-KI387_033192,gene-KI387_021013,gene-KI387_001527
GO:0009892	negative regulation of metabolic process	biological_process	0.50376	1	20	2861	151	24160	gene-KI387_022908,Novel06149,gene-KI387_010359,Novel00083,gene-KI387_037910,Novel03833,Novel02501,gene-KI387_008144,gene-KI387_030903,gene-KI387_022929,Novel02084,gene-KI387_024848,gene-KI387_003795,Novel04351,Novel00556,gene-KI387_022303,gene-KI387_019276,Novel02565,Novel00180,Novel04215
GO:0008483	transaminase activity	molecular_function	0.5054	1	2	2861	11	24160	gene-KI387_031955,gene-KI387_022294
GO:0003777	microtubule motor activity	molecular_function	0.50555	1	14	2861	101	24160	gene-KI387_006743,gene-KI387_002375,gene-KI387_020535,gene-KI387_006735,gene-KI387_015068,gene-KI387_025960,gene-KI387_023454,gene-KI387_024634,gene-KI387_006299,gene-KI387_034972,gene-KI387_039261,gene-KI387_036167,gene-KI387_023866,gene-KI387_016802
GO:0004096	catalase activity	molecular_function	0.50559	1	1	2861	4	24160	gene-KI387_024819
GO:0003684	damaged DNA binding	molecular_function	0.50618	1	4	2861	27	24160	Novel01416,gene-KI387_005616,gene-KI387_022309,Novel06724
GO:0015629	actin cytoskeleton	cellular_component	0.50678	1	9	2861	79	24160	gene-KI387_026648,gene-KI387_018108,gene-KI387_020237,gene-KI387_035631,gene-KI387_025940,gene-KI387_026029,gene-KI387_015215,Novel03340,gene-KI387_015278
GO:0072657	protein localization to membrane	biological_process	0.50685	1	13	2861	103	24160	gene-KI387_005548,gene-KI387_027956,gene-KI387_035637,gene-KI387_002012,gene-KI387_018291,gene-KI387_012544,Novel05615,gene-KI387_011378,gene-KI387_036854,gene-KI387_016272,gene-KI387_021013,gene-KI387_033192,gene-KI387_009072
GO:0090150	establishment of protein localization to membrane	biological_process	0.50685	1	13	2861	103	24160	gene-KI387_035637,gene-KI387_002012,gene-KI387_018291,gene-KI387_005548,gene-KI387_027956,gene-KI387_021013,gene-KI387_033192,gene-KI387_009072,gene-KI387_012544,gene-KI387_011378,Novel05615,gene-KI387_036854,gene-KI387_016272
GO:0070925	organelle assembly	biological_process	0.50686	1	13	2861	115	24160	Novel04360,gene-KI387_009794,gene-KI387_019866,gene-KI387_024161,gene-KI387_015456,gene-KI387_029831,gene-KI387_025607,Novel00067,gene-KI387_005905,gene-KI387_010283,Novel02313,gene-KI387_019400,gene-KI387_003620
GO:0008134	transcription factor binding	molecular_function	0.50724	1	30	2861	230	24160	Novel04360,gene-KI387_028659,gene-KI387_028904,Novel05896,gene-KI387_006267,Novel00415,gene-KI387_010969,gene-KI387_037852,gene-KI387_002376,gene-KI387_023573,gene-KI387_015456,gene-KI387_021105,gene-KI387_035628,gene-KI387_041451,gene-KI387_031942,gene-KI387_020056,gene-KI387_010355,gene-KI387_013606,Novel02565,gene-KI387_020524,Novel06979,gene-KI387_009389,gene-KI387_017956,gene-KI387_020747,No…
GO:0015631	tubulin binding	molecular_function	0.50805	1	25	2861	187	24160	gene-KI387_024634,gene-KI387_003117,gene-KI387_034972,Novel02794,gene-KI387_016802,gene-KI387_020535,gene-KI387_000870,gene-KI387_025960,gene-KI387_011090,gene-KI387_006299,gene-KI387_021462,gene-KI387_039261,gene-KI387_023866,Novel06199,gene-KI387_036167,gene-KI387_002375,gene-KI387_006743,Novel02825,gene-KI387_015068,gene-KI387_006735,gene-KI387_037852,Novel02652,gene-KI387_030500,gene-KI387_02…
GO:0000794	condensed nuclear chromosome	cellular_component	0.50837	1	10	2861	89	24160	Novel04146,gene-KI387_015120,gene-KI387_000228,gene-KI387_034863,gene-KI387_023468,gene-KI387_037640,gene-KI387_019655,gene-KI387_031285,gene-KI387_008992,gene-KI387_042546
GO:0009877	nodulation	biological_process	0.50843	1	4	2861	31	24160	gene-KI387_026381,gene-KI387_002763,gene-KI387_006791,gene-KI387_024903
GO:0006030	chitin metabolic process	biological_process	0.50927	1	5	2861	43	24160	gene-KI387_014522,gene-KI387_014524,gene-KI387_027427,gene-KI387_014523,gene-KI387_019179
GO:1901071	glucosamine-containing compound metabolic process	biological_process	0.50927	1	5	2861	43	24160	gene-KI387_014523,gene-KI387_019179,gene-KI387_014524,gene-KI387_027427,gene-KI387_014522
GO:0042126	nitrate metabolic process	biological_process	0.50943	1	1	2861	7	24160	gene-KI387_034638
GO:0042128	nitrate assimilation	biological_process	0.50943	1	1	2861	7	24160	gene-KI387_034638
GO:0007154	cell communication	biological_process	0.5096	1	134	2861	1036	24160	gene-KI387_035275,gene-KI387_008045,gene-KI387_006178,gene-KI387_025123,gene-KI387_020056,gene-KI387_012666,gene-KI387_022303,gene-KI387_033312,gene-KI387_033296,gene-KI387_033305,gene-KI387_021300,gene-KI387_012280,Novel02652,gene-KI387_022918,gene-KI387_032870,gene-KI387_033939,Novel02306,gene-KI387_043278,gene-KI387_010283,gene-KI387_030894,gene-KI387_015120,gene-KI387_020471,gene-KI387_015729…
GO:0006605	protein targeting	biological_process	0.51059	1	17	2861	132	24160	gene-KI387_002012,gene-KI387_012544,gene-KI387_022676,gene-KI387_002463,gene-KI387_005548,gene-KI387_022317,gene-KI387_027956,gene-KI387_035637,gene-KI387_018291,gene-KI387_011378,gene-KI387_036854,gene-KI387_016272,gene-KI387_039966,gene-KI387_021013,gene-KI387_004589,gene-KI387_033192,gene-KI387_001527
GO:0008171	O-methyltransferase activity	molecular_function	0.51236	1	11	2861	92	24160	gene-KI387_019312,Novel04072,gene-KI387_033140,gene-KI387_019279,gene-KI387_015766,gene-KI387_012843,gene-KI387_019278,gene-KI387_018156,gene-KI387_009633,gene-KI387_033141,gene-KI387_008486
GO:0046838	phosphorylated carbohydrate dephosphorylation	biological_process	0.5126	1	1	2861	7	24160	gene-KI387_005875
GO:0046855	inositol phosphate dephosphorylation	biological_process	0.5126	1	1	2861	7	24160	gene-KI387_005875
GO:0071545	inositol phosphate catabolic process	biological_process	0.5126	1	1	2861	7	24160	gene-KI387_005875
GO:0030289	protein phosphatase 4 complex	cellular_component	0.51435	1	2	2861	13	24160	Novel07508,gene-KI387_038128
GO:0033646	host intracellular part	cellular_component	0.51457	1	29	2861	231	24160	gene-KI387_008829,gene-KI387_003034,gene-KI387_020471,gene-KI387_000035,gene-KI387_017214,Novel01029,gene-KI387_017956,Novel03889,gene-KI387_023509,Novel02313,Novel00314,gene-KI387_026804,gene-KI387_013326,gene-KI387_024600,gene-KI387_022919,gene-KI387_021948,gene-KI387_043920,gene-KI387_031285,gene-KI387_008827,gene-KI387_010283,gene-KI387_000234,gene-KI387_031888,gene-KI387_032240,gene-KI387_02…
GO:0043656	host intracellular region	cellular_component	0.51457	1	29	2861	231	24160	gene-KI387_017956,Novel03889,gene-KI387_020471,gene-KI387_000035,gene-KI387_003034,gene-KI387_017214,Novel01029,gene-KI387_008829,gene-KI387_026804,gene-KI387_023509,Novel02313,Novel00314,gene-KI387_031285,gene-KI387_043920,gene-KI387_021948,gene-KI387_022919,gene-KI387_024600,gene-KI387_013326,gene-KI387_002426,gene-KI387_016654,gene-KI387_022830,gene-KI387_023722,gene-KI387_015672,gene-KI387_03…
GO:0051382	kinetochore assembly	biological_process	0.51476	1	6	2861	51	24160	gene-KI387_010283,gene-KI387_029831,gene-KI387_024161,gene-KI387_003620,gene-KI387_019400,Novel04360
GO:0051383	kinetochore organization	biological_process	0.51476	1	6	2861	51	24160	Novel04360,gene-KI387_024161,gene-KI387_029831,gene-KI387_010283,gene-KI387_019400,gene-KI387_003620
GO:0009451	RNA modification	biological_process	0.51499	1	29	2861	215	24160	gene-KI387_031942,gene-KI387_027887,Novel01209,gene-KI387_038727,gene-KI387_028329,gene-KI387_013169,gene-KI387_016651,gene-KI387_037852,gene-KI387_035702,gene-KI387_025622,gene-KI387_028904,gene-KI387_032349,gene-KI387_030368,Novel04312,Novel05393,Novel05050,gene-KI387_013319,gene-KI387_020169,gene-KI387_010975,gene-KI387_023060,gene-KI387_033744,Novel02060,gene-KI387_010074,Novel03542,gene-KI38…
GO:0008942	nitrite reductase [NAD(P)H] activity	molecular_function	0.51553	1	1	2861	5	24160	gene-KI387_023251
GO:0046857	oxidoreductase activity, acting on other nitrogenous compounds as donors, with NAD or NADP as acceptor	molecular_function	0.51553	1	1	2861	5	24160	gene-KI387_023251
GO:0080134	regulation of response to stress	biological_process	0.5163	1	7	2861	51	24160	gene-KI387_010611,Novel03173,Novel07019,Novel07020,Novel05856,gene-KI387_012566,gene-KI387_012362
GO:0044770	cell cycle phase transition	biological_process	0.51781	1	3	2861	21	24160	gene-KI387_013946,Novel07598,Novel04010
GO:1901987	regulation of cell cycle phase transition	biological_process	0.51781	1	3	2861	21	24160	Novel07598,gene-KI387_013946,Novel04010
GO:0000377	RNA splicing, via transesterification reactions with bulged adenosine as nucleophile	biological_process	0.51819	1	7	2861	55	24160	Novel06516,Novel01373,gene-KI387_032225,gene-KI387_037564,gene-KI387_020214,gene-KI387_000026,gene-KI387_020237
GO:0000398	mRNA splicing, via spliceosome	biological_process	0.51819	1	7	2861	55	24160	gene-KI387_032225,Novel01373,Novel06516,gene-KI387_020237,gene-KI387_000026,gene-KI387_037564,gene-KI387_020214
GO:0045300	acyl-[acyl-carrier-protein] desaturase activity	molecular_function	0.51882	1	1	2861	7	24160	gene-KI387_036104
GO:0008514	organic anion transmembrane transporter activity	molecular_function	0.51955	1	4	2861	27	24160	gene-KI387_005704,gene-KI387_018969,gene-KI387_026642,gene-KI387_011451
GO:0004602	glutathione peroxidase activity	molecular_function	0.52062	1	1	2861	9	24160	gene-KI387_004730
GO:0005199	structural constituent of cell wall	molecular_function	0.52153	1	4	2861	31	24160	gene-KI387_019866,Novel03399,gene-KI387_043349,Novel03780
GO:0000159	protein phosphatase type 2A complex	cellular_component	0.52188	1	2	2861	11	24160	gene-KI387_020471,gene-KI387_025662
GO:0015108	chloride transmembrane transporter activity	molecular_function	0.5233	1	3	2861	19	24160	Novel01258,gene-KI387_008890,gene-KI387_014593
GO:0008759	UDP-3-O-[3-hydroxymyristoyl] N-acetylglucosamine deacetylase activity	molecular_function	0.52355	1	1	2861	5	24160	gene-KI387_039361
GO:0019213	deacetylase activity	molecular_function	0.52355	1	1	2861	5	24160	gene-KI387_039361
GO:0007017	microtubule-based process	biological_process	0.52472	1	23	2861	183	24160	gene-KI387_039261,gene-KI387_006299,gene-KI387_036167,gene-KI387_023866,gene-KI387_006735,gene-KI387_015068,Novel02441,gene-KI387_006743,gene-KI387_002375,Novel02028,gene-KI387_023454,gene-KI387_034972,Novel01094,Novel03993,Novel00908,gene-KI387_024634,gene-KI387_016802,gene-KI387_025607,gene-KI387_008605,gene-KI387_020535,gene-KI387_002957,gene-KI387_025960,Novel05638
GO:0007059	chromosome segregation	biological_process	0.52575	1	14	2861	116	24160	gene-KI387_008992,gene-KI387_030500,gene-KI387_018789,gene-KI387_000696,gene-KI387_034638,gene-KI387_025626,Novel02825,gene-KI387_033085,gene-KI387_015500,Novel02794,gene-KI387_034863,gene-KI387_000695,gene-KI387_023468,gene-KI387_029868
GO:0043207	response to external biotic stimulus	biological_process	0.52618	1	29	2861	291	24160	gene-KI387_002297,Novel04958,gene-KI387_013007,gene-KI387_022646,gene-KI387_035433,gene-KI387_022648,gene-KI387_018047,Novel07020,gene-KI387_025090,gene-KI387_012362,gene-KI387_033682,Novel07019,gene-KI387_033634,Novel01803,gene-KI387_010611,gene-KI387_032566,gene-KI387_014694,gene-KI387_015637,gene-KI387_015142,gene-KI387_020323,gene-KI387_019579,Novel02778,gene-KI387_019300,gene-KI387_022654,ge…
GO:0051707	response to other organism	biological_process	0.52618	1	29	2861	291	24160	Novel07020,gene-KI387_018047,gene-KI387_022648,gene-KI387_035433,gene-KI387_022646,gene-KI387_013007,Novel04958,gene-KI387_002297,Novel01803,gene-KI387_033634,gene-KI387_010611,gene-KI387_033682,Novel07019,gene-KI387_012362,gene-KI387_025090,gene-KI387_019579,gene-KI387_020323,Novel02778,gene-KI387_019300,gene-KI387_022654,gene-KI387_015142,gene-KI387_015637,gene-KI387_014694,gene-KI387_032566,ge…
GO:0003774	motor activity	molecular_function	0.5265	1	17	2861	129	24160	gene-KI387_015215,gene-KI387_025960,gene-KI387_020535,gene-KI387_037720,gene-KI387_016802,gene-KI387_024634,gene-KI387_034972,gene-KI387_023454,gene-KI387_006743,gene-KI387_002375,gene-KI387_006735,gene-KI387_015068,gene-KI387_036167,gene-KI387_023866,gene-KI387_006299,gene-KI387_020237,gene-KI387_039261
GO:0016055	Wnt signaling pathway	biological_process	0.52682	1	4	2861	28	24160	gene-KI387_015378,gene-KI387_015382,Novel06443,gene-KI387_015386
GO:0198738	cell-cell signaling by wnt	biological_process	0.52682	1	4	2861	28	24160	gene-KI387_015386,Novel06443,gene-KI387_015382,gene-KI387_015378
GO:1905114	cell surface receptor signaling pathway involved in cell-cell signaling	biological_process	0.52682	1	4	2861	28	24160	gene-KI387_015378,gene-KI387_015382,Novel06443,gene-KI387_015386
GO:0006626	protein targeting to mitochondrion	biological_process	0.52755	1	3	2861	20	24160	gene-KI387_039966,gene-KI387_022317,gene-KI387_002463
GO:0030150	protein import into mitochondrial matrix	biological_process	0.52755	1	3	2861	20	24160	gene-KI387_039966,gene-KI387_022317,gene-KI387_002463
GO:0000956	nuclear-transcribed mRNA catabolic process	biological_process	0.52941	1	3	2861	19	24160	Novel02084,gene-KI387_037910,gene-KI387_019276
GO:0008324	cation transmembrane transporter activity	molecular_function	0.52992	1	78	2861	631	24160	Novel05469,Novel06978,gene-KI387_025376,gene-KI387_004834,gene-KI387_015120,Novel06026,Novel03232,Novel04931,gene-KI387_014558,gene-KI387_007364,gene-KI387_024899,Novel00554,gene-KI387_033881,gene-KI387_030440,gene-KI387_033736,gene-KI387_037459,gene-KI387_036725,gene-KI387_033806,gene-KI387_005769,gene-KI387_028945,gene-KI387_032296,gene-KI387_026642,gene-KI387_029392,gene-KI387_008450,gene-KI38…
GO:0040007	growth	biological_process	0.53	1	2	2861	18	24160	gene-KI387_023574,gene-KI387_024352
GO:0051129	negative regulation of cellular component organization	biological_process	0.53165	1	4	2861	32	24160	gene-KI387_018108,gene-KI387_026648,gene-KI387_013606,gene-KI387_015278
GO:0005549	odorant binding	molecular_function	0.53317	1	1	2861	5	24160	gene-KI387_030371
GO:0016477	cell migration	biological_process	0.53439	1	2	2861	12	24160	gene-KI387_033088,gene-KI387_015750
GO:0030334	regulation of cell migration	biological_process	0.53439	1	2	2861	12	24160	gene-KI387_015750,gene-KI387_033088
GO:2000145	regulation of cell motility	biological_process	0.53439	1	2	2861	12	24160	gene-KI387_015750,gene-KI387_033088
GO:0004866	endopeptidase inhibitor activity	molecular_function	0.53463	1	7	2861	63	24160	Novel04537,Novel00176,gene-KI387_005305,gene-KI387_005704,Novel01962,Novel00031,gene-KI387_012618
GO:0061135	endopeptidase regulator activity	molecular_function	0.53463	1	7	2861	63	24160	Novel00176,gene-KI387_005305,Novel04537,Novel01962,gene-KI387_005704,Novel00031,gene-KI387_012618
GO:0008641	ubiquitin-like modifier activating enzyme activity	molecular_function	0.53474	1	4	2861	27	24160	gene-KI387_029517,gene-KI387_001655,gene-KI387_021019,gene-KI387_024848
GO:0051346	negative regulation of hydrolase activity	biological_process	0.53882	1	3	2861	29	24160	gene-KI387_013606,Novel03286,Novel03833
GO:0008948	oxaloacetate decarboxylase activity	molecular_function	0.53923	1	2	2861	16	24160	Novel06026,gene-KI387_000035
GO:0035725	sodium ion transmembrane transport	biological_process	0.53923	1	2	2861	16	24160	gene-KI387_000035,Novel06026
GO:0036376	sodium ion export across plasma membrane	biological_process	0.53923	1	2	2861	16	24160	gene-KI387_000035,Novel06026
GO:0002253	activation of immune response	biological_process	0.5394	1	2	2861	11	24160	gene-KI387_032563,gene-KI387_035995
GO:0050778	positive regulation of immune response	biological_process	0.5394	1	2	2861	11	24160	gene-KI387_035995,gene-KI387_032563
GO:0015035	protein disulfide oxidoreductase activity	molecular_function	0.54109	1	5	2861	47	24160	gene-KI387_006240,gene-KI387_025123,gene-KI387_012988,gene-KI387_021085,gene-KI387_032598
GO:0015036	disulfide oxidoreductase activity	molecular_function	0.54109	1	5	2861	47	24160	gene-KI387_032598,gene-KI387_012988,gene-KI387_021085,gene-KI387_025123,gene-KI387_006240
GO:0019208	phosphatase regulator activity	molecular_function	0.54247	1	6	2861	44	24160	gene-KI387_020471,gene-KI387_025662,gene-KI387_017389,gene-KI387_038128,Novel07508,Novel03833
GO:0009607	response to biotic stimulus	biological_process	0.54264	1	30	2861	302	24160	Novel07020,gene-KI387_018047,gene-KI387_022648,gene-KI387_035433,gene-KI387_022646,gene-KI387_013007,Novel04958,gene-KI387_002297,gene-KI387_033634,Novel01803,gene-KI387_010611,gene-KI387_033682,Novel07019,gene-KI387_012362,gene-KI387_025090,Novel06427,gene-KI387_019579,gene-KI387_020323,Novel02778,gene-KI387_022654,gene-KI387_019300,gene-KI387_015142,gene-KI387_015637,gene-KI387_032566,gene-KI38…
GO:0071941	nitrogen cycle metabolic process	biological_process	0.54268	1	2	2861	15	24160	Novel05483,gene-KI387_034638
GO:0005283	amino acid:sodium symporter activity	molecular_function	0.54287	1	1	2861	5	24160	gene-KI387_026642
GO:0005343	organic acid:sodium symporter activity	molecular_function	0.54287	1	1	2861	5	24160	gene-KI387_026642
GO:0005416	amino acid:cation symporter activity	molecular_function	0.54287	1	1	2861	5	24160	gene-KI387_026642
GO:0015175	neutral amino acid transmembrane transporter activity	molecular_function	0.54287	1	1	2861	5	24160	gene-KI387_026642
GO:0015655	alanine:sodium symporter activity	molecular_function	0.54287	1	1	2861	5	24160	gene-KI387_026642
GO:0015804	neutral amino acid transport	biological_process	0.54287	1	1	2861	5	24160	gene-KI387_026642
GO:0022858	alanine transmembrane transporter activity	molecular_function	0.54287	1	1	2861	5	24160	gene-KI387_026642
GO:0032328	alanine transport	biological_process	0.54287	1	1	2861	5	24160	gene-KI387_026642
GO:1901292	nucleoside phosphate catabolic process	biological_process	0.54314	1	2	2861	17	24160	gene-KI387_008361,gene-KI387_001502
GO:0047429	nucleoside-triphosphate diphosphatase activity	molecular_function	0.54344	1	2	2861	16	24160	gene-KI387_008361,gene-KI387_001502
GO:0051168	nuclear export	biological_process	0.54383	1	3	2861	22	24160	Novel02652,Novel03889,gene-KI387_037293
GO:0019207	kinase regulator activity	molecular_function	0.54387	1	5	2861	43	24160	gene-KI387_032023,gene-KI387_011802,Novel01311,Novel04864,Novel05903
GO:0005253	anion channel activity	molecular_function	0.54434	1	3	2861	21	24160	gene-KI387_014593,gene-KI387_008890,Novel01258
GO:0030031	cell projection assembly	biological_process	0.54524	1	5	2861	40	24160	gene-KI387_025607,Novel07508,Novel00067,gene-KI387_019866,Novel02313
GO:0009966	regulation of signal transduction	biological_process	0.54572	1	10	2861	78	24160	gene-KI387_015378,gene-KI387_015382,Novel07208,gene-KI387_024888,gene-KI387_032037,gene-KI387_015386,gene-KI387_017389,Novel00919,gene-KI387_021515,gene-KI387_030894
GO:0005375	copper ion transmembrane transporter activity	molecular_function	0.54689	1	1	2861	6	24160	gene-KI387_028945
GO:0035434	copper ion transmembrane transport	biological_process	0.54689	1	1	2861	6	24160	gene-KI387_028945
GO:0016894	endonuclease activity, active with either ribo- or deoxyribonucleic acids and producing 3-phosphomonoesters	molecular_function	0.54741	1	2	2861	15	24160	gene-KI387_034521,gene-KI387_034526
GO:0046812	host cell surface binding	molecular_function	0.54786	1	2	2861	16	24160	gene-KI387_026395,Novel04072
GO:0051205	protein insertion into membrane	biological_process	0.54891	1	2	2861	15	24160	Novel05615,gene-KI387_009072
GO:0044248	cellular catabolic process	biological_process	0.54905	1	48	2861	408	24160	gene-KI387_022309,gene-KI387_024903,Novel00804,gene-KI387_008361,gene-KI387_032618,gene-KI387_009794,gene-KI387_000234,gene-KI387_006020,gene-KI387_012666,gene-KI387_001747,gene-KI387_035628,gene-KI387_019276,gene-KI387_019179,gene-KI387_014524,gene-KI387_017214,gene-KI387_037910,gene-KI387_003034,gene-KI387_033078,gene-KI387_033828,gene-KI387_019587,gene-KI387_022673,gene-KI387_005905,gene-KI387…
GO:0006730	one-carbon metabolic process	biological_process	0.54921	1	1	2861	9	24160	gene-KI387_021000
GO:0016730	oxidoreductase activity, acting on iron-sulfur proteins as donors	molecular_function	0.5493	1	1	2861	6	24160	Novel02113
GO:0006406	mRNA export from nucleus	biological_process	0.54982	1	2	2861	15	24160	gene-KI387_037293,Novel03889
GO:0006611	protein export from nucleus	biological_process	0.54982	1	2	2861	15	24160	gene-KI387_037293,Novel03889
GO:0071166	ribonucleoprotein complex localization	biological_process	0.54982	1	2	2861	15	24160	gene-KI387_037293,Novel03889
GO:0071426	ribonucleoprotein complex export from nucleus	biological_process	0.54982	1	2	2861	15	24160	gene-KI387_037293,Novel03889
GO:0071427	mRNA-containing ribonucleoprotein complex export from nucleus	biological_process	0.54982	1	2	2861	15	24160	gene-KI387_037293,Novel03889
GO:0003997	acyl-CoA oxidase activity	molecular_function	0.55026	1	1	2861	6	24160	gene-KI387_037443
GO:0000776	kinetochore	cellular_component	0.55194	1	15	2861	135	24160	gene-KI387_034863,gene-KI387_000228,gene-KI387_015120,gene-KI387_023468,gene-KI387_003620,gene-KI387_000695,Novel04360,gene-KI387_019655,gene-KI387_018789,gene-KI387_000696,gene-KI387_035995,gene-KI387_025626,gene-KI387_042546,gene-KI387_024161,gene-KI387_037563
GO:0031369	translation initiation factor binding	molecular_function	0.55297	1	3	2861	21	24160	gene-KI387_022303,gene-KI387_010570,gene-KI387_010359
GO:0070566	adenylyltransferase activity	molecular_function	0.55389	1	4	2861	29	24160	gene-KI387_005910,gene-KI387_012712,gene-KI387_005912,gene-KI387_001044
GO:0098772	molecular function regulator	molecular_function	0.5542	1	85	2861	723	24160	gene-KI387_025877,Novel04864,gene-KI387_016067,gene-KI387_039683,gene-KI387_006717,gene-KI387_003855,gene-KI387_027826,gene-KI387_006743,gene-KI387_022324,gene-KI387_013319,gene-KI387_002356,gene-KI387_039275,gene-KI387_030295,gene-KI387_017389,Novel01143,gene-KI387_000422,Novel05718,gene-KI387_004726,Novel02153,Novel03194,gene-KI387_038128,gene-KI387_014392,gene-KI387_012618,Novel01962,Novel0205…
GO:0008645	hexose transmembrane transport	biological_process	0.55444	1	1	2861	5	24160	Novel06919
GO:0098542	defense response to other organism	biological_process	0.55529	1	26	2861	272	24160	Novel01803,gene-KI387_033634,gene-KI387_010611,Novel07019,gene-KI387_033682,gene-KI387_025090,gene-KI387_012362,gene-KI387_022648,gene-KI387_035433,Novel07020,gene-KI387_018047,Novel04958,gene-KI387_002297,gene-KI387_022646,gene-KI387_013007,gene-KI387_016202,gene-KI387_015456,gene-KI387_015637,Novel02778,gene-KI387_019579,gene-KI387_020323,gene-KI387_022654,gene-KI387_019300,gene-KI387_015142,ge…
GO:0060966	regulation of gene silencing by RNA	biological_process	0.55537	1	1	2861	5	24160	gene-KI387_024848
GO:0060968	regulation of gene silencing	biological_process	0.55537	1	1	2861	5	24160	gene-KI387_024848
GO:0009396	folic acid-containing compound biosynthetic process	biological_process	0.55591	1	1	2861	6	24160	Novel00583
GO:0022890	inorganic cation transmembrane transporter activity	molecular_function	0.56026	1	73	2861	594	24160	gene-KI387_026091,gene-KI387_038094,gene-KI387_001423,gene-KI387_015726,gene-KI387_008310,gene-KI387_024124,gene-KI387_039570,Novel02199,gene-KI387_024034,Novel05763,gene-KI387_012544,gene-KI387_037724,gene-KI387_037067,gene-KI387_009073,gene-KI387_033175,gene-KI387_023574,gene-KI387_022986,Novel01457,gene-KI387_025940,gene-KI387_002037,Novel01759,gene-KI387_029421,gene-KI387_015725,gene-KI387_00…
GO:0090730	Las1 complex	cellular_component	0.56103	1	1	2861	6	24160	gene-KI387_022996
GO:0031967	organelle envelope	cellular_component	0.56224	1	34	2861	285	24160	gene-KI387_007444,Novel04001,gene-KI387_009892,gene-KI387_039261,gene-KI387_023725,gene-KI387_007107,gene-KI387_021000,gene-KI387_012076,gene-KI387_005969,Novel03901,gene-KI387_023931,Novel06611,Novel04857,gene-KI387_022317,Novel03665,gene-KI387_036846,gene-KI387_042546,Novel06197,gene-KI387_037293,gene-KI387_022676,Novel01457,gene-KI387_023358,Novel01759,gene-KI387_020416,gene-KI387_020471,gene-…
GO:0098687	chromosomal region	cellular_component	0.56345	1	21	2861	189	24160	gene-KI387_019655,Novel04360,gene-KI387_035995,gene-KI387_042546,gene-KI387_037563,gene-KI387_018789,gene-KI387_015120,gene-KI387_000228,Novel01067,gene-KI387_034863,gene-KI387_010266,gene-KI387_025626,gene-KI387_024161,gene-KI387_023728,gene-KI387_000696,Novel02576,Novel04836,Novel06055,gene-KI387_000695,gene-KI387_003620,gene-KI387_023468
GO:0010033	response to organic substance	biological_process	0.56482	1	14	2861	116	24160	gene-KI387_035556,Novel04360,gene-KI387_008718,gene-KI387_027035,gene-KI387_033192,gene-KI387_007101,gene-KI387_020416,gene-KI387_022918,gene-KI387_023796,Novel07003,Novel04215,gene-KI387_030894,gene-KI387_017765,gene-KI387_035506
GO:0000375	RNA splicing, via transesterification reactions	biological_process	0.56609	1	9	2861	70	24160	Novel06516,Novel01373,gene-KI387_037564,gene-KI387_000026,gene-KI387_032225,gene-KI387_007517,gene-KI387_003855,gene-KI387_020214,gene-KI387_020237
GO:0006625	protein targeting to peroxisome	biological_process	0.5664	1	1	2861	7	24160	gene-KI387_011378
GO:0015919	peroxisomal membrane transport	biological_process	0.5664	1	1	2861	7	24160	gene-KI387_011378
GO:0043574	peroxisomal transport	biological_process	0.5664	1	1	2861	7	24160	gene-KI387_011378
GO:0072662	protein localization to peroxisome	biological_process	0.5664	1	1	2861	7	24160	gene-KI387_011378
GO:0072663	establishment of protein localization to peroxisome	biological_process	0.5664	1	1	2861	7	24160	gene-KI387_011378
GO:0004549	tRNA-specific ribonuclease activity	molecular_function	0.5667	1	2	2861	16	24160	gene-KI387_038880,Novel00042
GO:0000724	double-strand break repair via homologous recombination	biological_process	0.56696	1	1	2861	5	24160	gene-KI387_030668
GO:0000139	Golgi membrane	cellular_component	0.56758	1	3	2861	24	24160	gene-KI387_042546,Novel02505,gene-KI387_038813
GO:0010628	positive regulation of gene expression	biological_process	0.56817	1	10	2861	81	24160	gene-KI387_037293,gene-KI387_034125,gene-KI387_033210,gene-KI387_037852,gene-KI387_023573,Novel03665,gene-KI387_041113,Novel06186,Novel00067,Novel02565
GO:0030234	enzyme regulator activity	molecular_function	0.56885	1	45	2861	377	24160	gene-KI387_002356,gene-KI387_025662,gene-KI387_017389,Novel02613,Novel05718,gene-KI387_000422,Novel01143,gene-KI387_027955,gene-KI387_023931,gene-KI387_016067,gene-KI387_039683,Novel04864,Novel03286,gene-KI387_022759,Novel01311,gene-KI387_019276,Novel00004,gene-KI387_006717,gene-KI387_006743,gene-KI387_027826,gene-KI387_011802,gene-KI387_032023,gene-KI387_006164,gene-KI387_003620,gene-KI387_03804…
GO:0042575	DNA polymerase complex	cellular_component	0.56887	1	3	2861	25	24160	gene-KI387_013319,gene-KI387_003117,gene-KI387_031655
GO:0051537	2 iron, 2 sulfur cluster binding	molecular_function	0.5692	1	4	2861	36	24160	gene-KI387_031803,gene-KI387_016931,gene-KI387_009360,gene-KI387_023251
GO:0006276	plasmid maintenance	biological_process	0.56957	1	1	2861	6	24160	Novel00748
GO:0070887	cellular response to chemical stimulus	biological_process	0.56968	1	6	2861	50	24160	gene-KI387_020416,gene-KI387_032657,gene-KI387_022918,gene-KI387_030894,Novel04360,gene-KI387_027035
GO:0010646	regulation of cell communication	biological_process	0.57	1	10	2861	80	24160	gene-KI387_017389,Novel00919,gene-KI387_021515,gene-KI387_030894,gene-KI387_015382,gene-KI387_015378,Novel07208,gene-KI387_024888,gene-KI387_032037,gene-KI387_015386
GO:0023051	regulation of signaling	biological_process	0.57	1	10	2861	80	24160	gene-KI387_030894,gene-KI387_017389,Novel00919,gene-KI387_021515,gene-KI387_032037,gene-KI387_015386,gene-KI387_015382,gene-KI387_015378,Novel07208,gene-KI387_024888
GO:0042175	nuclear outer membrane-endoplasmic reticulum membrane network	cellular_component	0.57013	1	25	2861	217	24160	Novel02306,Novel05969,gene-KI387_031655,gene-KI387_030500,gene-KI387_012544,gene-KI387_023573,gene-KI387_042546,gene-KI387_037852,Novel07508,Novel06145,gene-KI387_020056,gene-KI387_002517,Novel00724,gene-KI387_016146,Novel00743,gene-KI387_015729,Novel01404,gene-KI387_032657,Novel06238,Novel02199,gene-KI387_018291,gene-KI387_030994,gene-KI387_025078,Novel01051,gene-KI387_032237
GO:0009790	embryo development	biological_process	0.57124	1	2	2861	14	24160	gene-KI387_033088,gene-KI387_015750
GO:0006511	ubiquitin-dependent protein catabolic process	biological_process	0.57183	1	12	2861	102	24160	gene-KI387_035628,gene-KI387_018661,Novel06949,gene-KI387_000234,gene-KI387_022673,gene-KI387_032618,Novel00804,gene-KI387_024903,gene-KI387_003034,gene-KI387_017214,gene-KI387_022309,gene-KI387_032870
GO:0009405	pathogenesis	biological_process	0.57283	1	37	2861	299	24160	Novel02441,gene-KI387_010750,gene-KI387_037895,gene-KI387_028462,Novel05050,gene-KI387_012289,Novel05348,Novel03194,Novel06427,gene-KI387_025016,Novel00315,gene-KI387_028444,Novel04072,gene-KI387_008818,gene-KI387_000780,gene-KI387_010241,gene-KI387_004916,gene-KI387_028466,gene-KI387_033088,Novel04378,gene-KI387_038813,gene-KI387_023475,gene-KI387_013607,Novel01006,gene-KI387_020811,Novel07230,g…
GO:0070567	cytidylyltransferase activity	molecular_function	0.57308	1	1	2861	7	24160	gene-KI387_004512
GO:0006109	regulation of carbohydrate metabolic process	biological_process	0.57415	1	2	2861	12	24160	gene-KI387_020237,gene-KI387_015215
GO:0030975	thiamine binding	molecular_function	0.57425	1	1	2861	6	24160	Novel05743
GO:0098799	outer mitochondrial membrane protein complex	cellular_component	0.57441	1	5	2861	40	24160	gene-KI387_022676,gene-KI387_039966,gene-KI387_036846,gene-KI387_022317,gene-KI387_002463
GO:0008174	mRNA methyltransferase activity	molecular_function	0.5752	1	1	2861	7	24160	gene-KI387_032349
GO:0016765	transferase activity, transferring alkyl or aryl (other than methyl) groups	molecular_function	0.57583	1	8	2861	67	24160	gene-KI387_015766,gene-KI387_020578,Novel02360,Novel06832,gene-KI387_002336,gene-KI387_009195,gene-KI387_031368,gene-KI387_035662
GO:0009081	branched-chain amino acid metabolic process	biological_process	0.5759	1	2	2861	14	24160	Novel02366,Novel00847
GO:0009082	branched-chain amino acid biosynthetic process	biological_process	0.5759	1	2	2861	14	24160	Novel00847,Novel02366
GO:0006644	phospholipid metabolic process	biological_process	0.57602	1	17	2861	140	24160	gene-KI387_019517,Novel03847,Novel04775,Novel06238,gene-KI387_022307,gene-KI387_007035,gene-KI387_012559,gene-KI387_012562,gene-KI387_008045,gene-KI387_007364,gene-KI387_029961,gene-KI387_028163,Novel03194,gene-KI387_014088,gene-KI387_039361,gene-KI387_021407,gene-KI387_016358
GO:0000795	synaptonemal complex	cellular_component	0.57626	1	1	2861	7	24160	gene-KI387_008992
GO:0099086	synaptonemal structure	cellular_component	0.57626	1	1	2861	7	24160	gene-KI387_008992
GO:0004484	mRNA guanylyltransferase activity	molecular_function	0.57695	1	1	2861	6	24160	gene-KI387_014494
GO:0048878	chemical homeostasis	biological_process	0.57765	1	7	2861	62	24160	gene-KI387_029517,gene-KI387_033736,gene-KI387_033175,Novel04857,gene-KI387_025376,gene-KI387_005247,Novel06197
GO:0019773	proteasome core complex, alpha-subunit complex	cellular_component	0.57933	1	2	2861	19	24160	Novel06949,gene-KI387_018661
GO:0008217	regulation of blood pressure	biological_process	0.57992	1	1	2861	6	24160	Novel02791
GO:0006353	DNA-templated transcription, termination	biological_process	0.58185	1	2	2861	14	24160	Novel06742,gene-KI387_024587
GO:0009611	response to wounding	biological_process	0.58275	1	9	2861	111	24160	Novel03173,Novel00176,gene-KI387_006020,gene-KI387_015120,gene-KI387_003620,gene-KI387_011870,gene-KI387_025953,gene-KI387_013415,gene-KI387_005255
GO:1901264	carbohydrate derivative transport	biological_process	0.58357	1	2	2861	16	24160	Novel04773,gene-KI387_023071
GO:0004181	metallocarboxypeptidase activity	molecular_function	0.58415	1	1	2861	7	24160	gene-KI387_003251
GO:0005267	potassium channel activity	molecular_function	0.58437	1	4	2861	30	24160	gene-KI387_019866,Novel06411,gene-KI387_032296,Novel00827
GO:0019855	calcium channel inhibitor activity	molecular_function	0.5845	1	1	2861	8	24160	gene-KI387_038076
GO:0019941	modification-dependent protein catabolic process	biological_process	0.58488	1	12	2861	103	24160	gene-KI387_035628,gene-KI387_018661,gene-KI387_000234,Novel06949,gene-KI387_022673,gene-KI387_032618,Novel00804,gene-KI387_024903,gene-KI387_003034,gene-KI387_017214,gene-KI387_032870,gene-KI387_022309
GO:0043632	modification-dependent macromolecule catabolic process	biological_process	0.58488	1	12	2861	103	24160	gene-KI387_022673,Novel06949,gene-KI387_000234,gene-KI387_018661,gene-KI387_035628,gene-KI387_022309,gene-KI387_032870,gene-KI387_024903,gene-KI387_017214,gene-KI387_003034,Novel00804,gene-KI387_032618
GO:0019439	aromatic compound catabolic process	biological_process	0.58575	1	12	2861	99	24160	gene-KI387_017117,gene-KI387_026959,gene-KI387_019276,Novel05967,gene-KI387_008361,gene-KI387_001502,gene-KI387_019587,Novel02084,gene-KI387_033078,gene-KI387_037910,Novel04287,gene-KI387_033828
GO:0033588	Elongator holoenzyme complex	cellular_component	0.58808	1	3	2861	24	24160	gene-KI387_010074,Novel05393,gene-KI387_023060
GO:0005534	galactose binding	molecular_function	0.58826	1	1	2861	8	24160	Novel05869
GO:0016984	ribulose-bisphosphate carboxylase activity	molecular_function	0.58839	1	1	2861	6	24160	gene-KI387_021103
GO:0031514	motile cilium	cellular_component	0.58847	1	5	2861	39	24160	Novel02515,gene-KI387_030434,gene-KI387_000228,gene-KI387_020056,gene-KI387_034738
GO:0042558	pteridine-containing compound metabolic process	biological_process	0.58966	1	2	2861	19	24160	gene-KI387_001322,Novel00583
GO:0000002	mitochondrial genome maintenance	biological_process	0.58992	1	1	2861	6	24160	gene-KI387_035503
GO:0004865	protein serine/threonine phosphatase inhibitor activity	molecular_function	0.58993	1	1	2861	7	24160	Novel03833
GO:0010923	negative regulation of phosphatase activity	biological_process	0.58993	1	1	2861	7	24160	Novel03833
GO:0032515	negative regulation of phosphoprotein phosphatase activity	biological_process	0.58993	1	1	2861	7	24160	Novel03833
GO:0035305	negative regulation of dephosphorylation	biological_process	0.58993	1	1	2861	7	24160	Novel03833
GO:0035308	negative regulation of protein dephosphorylation	biological_process	0.58993	1	1	2861	7	24160	Novel03833
GO:0015002	heme-copper terminal oxidase activity	molecular_function	0.59054	1	7	2861	58	24160	Novel06611,gene-KI387_001423,gene-KI387_026091,gene-KI387_035815,gene-KI387_012544,Novel01759,gene-KI387_009892
GO:0055065	metal ion homeostasis	biological_process	0.59069	1	6	2861	54	24160	gene-KI387_033175,gene-KI387_033736,gene-KI387_029517,Novel06197,gene-KI387_025376,gene-KI387_005247
GO:0004784	superoxide dismutase activity	molecular_function	0.59101	1	1	2861	7	24160	Novel00691
GO:0016721	oxidoreductase activity, acting on superoxide radicals as acceptor	molecular_function	0.59101	1	1	2861	7	24160	Novel00691
GO:0000226	microtubule cytoskeleton organization	biological_process	0.59111	1	4	2861	35	24160	gene-KI387_002957,Novel05638,Novel02441,gene-KI387_008605
GO:0003918	DNA topoisomerase type II (double strand cut, ATP-hydrolyzing) activity	molecular_function	0.5916	1	2	2861	15	24160	gene-KI387_013526,gene-KI387_013528
GO:0015081	sodium ion transmembrane transporter activity	molecular_function	0.59187	1	4	2861	31	24160	Novel06026,gene-KI387_026642,Novel05763,gene-KI387_000035
GO:0006403	RNA localization	biological_process	0.59219	1	8	2861	65	24160	Novel03889,Novel02016,gene-KI387_037293,gene-KI387_023851,gene-KI387_019052,Novel04351,gene-KI387_026395,gene-KI387_035603
GO:0050657	nucleic acid transport	biological_process	0.59219	1	8	2861	65	24160	gene-KI387_019052,gene-KI387_037293,gene-KI387_023851,Novel03889,Novel02016,gene-KI387_026395,gene-KI387_035603,Novel04351
GO:0050658	RNA transport	biological_process	0.59219	1	8	2861	65	24160	Novel02016,Novel03889,gene-KI387_037293,gene-KI387_023851,gene-KI387_019052,Novel04351,gene-KI387_035603,gene-KI387_026395
GO:0051236	establishment of RNA localization	biological_process	0.59219	1	8	2861	65	24160	gene-KI387_019052,gene-KI387_037293,gene-KI387_023851,Novel02016,Novel03889,gene-KI387_035603,gene-KI387_026395,Novel04351
GO:0007249	I-kappaB kinase/NF-kappaB signaling	biological_process	0.59229	1	1	2861	5	24160	Novel07208
GO:0043122	regulation of I-kappaB kinase/NF-kappaB signaling	biological_process	0.59229	1	1	2861	5	24160	Novel07208
GO:0043123	positive regulation of I-kappaB kinase/NF-kappaB signaling	biological_process	0.59229	1	1	2861	5	24160	Novel07208
GO:0002064	epithelial cell development	biological_process	0.59268	1	2	2861	17	24160	Novel01894,Novel01910
GO:0044270	cellular nitrogen compound catabolic process	biological_process	0.59358	1	12	2861	97	24160	Novel02084,Novel04287,gene-KI387_033828,gene-KI387_033078,gene-KI387_037910,gene-KI387_001502,gene-KI387_019587,Novel05483,gene-KI387_008361,gene-KI387_019276,gene-KI387_017117,gene-KI387_026959
GO:0098805	whole membrane	cellular_component	0.59365	1	27	2861	218	24160	gene-KI387_036846,gene-KI387_020360,gene-KI387_035224,Novel03446,gene-KI387_013376,gene-KI387_022317,gene-KI387_002463,gene-KI387_007321,gene-KI387_039966,gene-KI387_021916,gene-KI387_006148,Novel06749,gene-KI387_003034,gene-KI387_020471,gene-KI387_000035,gene-KI387_011378,gene-KI387_002037,Novel06492,gene-KI387_000561,gene-KI387_010663,Novel03486,gene-KI387_029452,gene-KI387_022676,Novel02448,ge…
GO:0048585	negative regulation of response to stimulus	biological_process	0.59427	1	4	2861	35	24160	gene-KI387_015378,gene-KI387_015382,gene-KI387_030894,gene-KI387_015386
GO:0009069	serine family amino acid metabolic process	biological_process	0.59495	1	4	2861	27	24160	gene-KI387_032838,gene-KI387_001477,gene-KI387_031955,Novel03215
GO:0031109	microtubule polymerization or depolymerization	biological_process	0.59527	1	1	2861	6	24160	Novel05638
GO:0031110	regulation of microtubule polymerization or depolymerization	biological_process	0.59527	1	1	2861	6	24160	Novel05638
GO:0070507	regulation of microtubule cytoskeleton organization	biological_process	0.59527	1	1	2861	6	24160	Novel05638
GO:0008191	metalloendopeptidase inhibitor activity	molecular_function	0.59549	1	1	2861	7	24160	Novel04537
GO:0007031	peroxisome organization	biological_process	0.59595	1	3	2861	23	24160	gene-KI387_006148,Novel03446,gene-KI387_011378
GO:0031410	cytoplasmic vesicle	cellular_component	0.59601	1	16	2861	132	24160	gene-KI387_000561,gene-KI387_010663,Novel03486,Novel04351,Novel06492,gene-KI387_037130,Novel05114,gene-KI387_006267,gene-KI387_029452,Novel02448,gene-KI387_020721,gene-KI387_013376,gene-KI387_020360,gene-KI387_000035,gene-KI387_003034,Novel06749
GO:0031982	vesicle	cellular_component	0.59601	1	16	2861	132	24160	gene-KI387_000035,gene-KI387_003034,Novel06749,gene-KI387_013376,gene-KI387_020360,gene-KI387_006267,Novel05114,gene-KI387_020721,gene-KI387_029452,Novel02448,Novel03486,gene-KI387_010663,gene-KI387_000561,Novel04351,Novel06492,gene-KI387_037130
GO:0097708	intracellular vesicle	cellular_component	0.59601	1	16	2861	132	24160	Novel05114,gene-KI387_006267,gene-KI387_020721,gene-KI387_029452,Novel02448,Novel03486,gene-KI387_010663,gene-KI387_000561,Novel04351,gene-KI387_037130,Novel06492,gene-KI387_003034,gene-KI387_000035,Novel06749,gene-KI387_013376,gene-KI387_020360
GO:0004064	arylesterase activity	molecular_function	0.59698	1	1	2861	7	24160	gene-KI387_017753
GO:0022603	regulation of anatomical structure morphogenesis	biological_process	0.59777	1	1	2861	6	24160	gene-KI387_003620
GO:0070585	protein localization to mitochondrion	biological_process	0.5982	1	3	2861	22	24160	gene-KI387_039966,gene-KI387_022317,gene-KI387_002463
GO:0072655	establishment of protein localization to mitochondrion	biological_process	0.5982	1	3	2861	22	24160	gene-KI387_039966,gene-KI387_022317,gene-KI387_002463
GO:0043486	histone exchange	biological_process	0.59898	1	2	2861	14	24160	gene-KI387_039089,gene-KI387_021515
GO:0005740	mitochondrial envelope	cellular_component	0.59925	1	29	2861	248	24160	gene-KI387_020471,gene-KI387_005969,gene-KI387_020416,gene-KI387_012076,gene-KI387_023931,gene-KI387_021916,gene-KI387_039966,gene-KI387_007321,Novel01404,gene-KI387_015775,Novel00554,gene-KI387_002463,gene-KI387_022317,Novel06611,gene-KI387_036846,Novel03665,gene-KI387_024034,Novel06197,Novel04001,gene-KI387_007444,gene-KI387_042546,gene-KI387_009892,gene-KI387_022676,gene-KI387_023358,gene-KI38…
GO:0015994	chlorophyll metabolic process	biological_process	0.59944	1	4	2861	29	24160	gene-KI387_033828,Novel04287,Novel05615,gene-KI387_019587
GO:0006120	mitochondrial electron transport, NADH to ubiquinone	biological_process	0.59973	1	2	2861	16	24160	gene-KI387_023931,gene-KI387_008886
GO:0004930	G protein-coupled receptor activity	molecular_function	0.60016	1	5	2861	40	24160	gene-KI387_022318,gene-KI387_035338,gene-KI387_033177,Novel05012,gene-KI387_035341
GO:0008643	carbohydrate transport	biological_process	0.60025	1	6	2861	55	24160	Novel06919,gene-KI387_015120,gene-KI387_009565,gene-KI387_011370,gene-KI387_005704,gene-KI387_010382
GO:0051130	positive regulation of cellular component organization	biological_process	0.60056	1	2	2861	17	24160	gene-KI387_025940,Novel03044
GO:0016645	oxidoreductase activity, acting on the CH-NH group of donors	molecular_function	0.60066	1	7	2861	57	24160	Novel04282,gene-KI387_006691,gene-KI387_023671,gene-KI387_015713,gene-KI387_031287,gene-KI387_033825,gene-KI387_033745
GO:0008284	positive regulation of cell population proliferation	biological_process	0.60105	1	1	2861	10	24160	Novel03286
GO:1904680	peptide transmembrane transporter activity	molecular_function	0.60142	1	1	2861	8	24160	gene-KI387_033462
GO:1902555	endoribonuclease complex	cellular_component	0.60157	1	1	2861	7	24160	gene-KI387_022996
GO:1905348	endonuclease complex	cellular_component	0.60157	1	1	2861	7	24160	gene-KI387_022996
GO:0017148	negative regulation of translation	biological_process	0.60209	1	2	2861	16	24160	gene-KI387_022303,gene-KI387_010359
GO:0034249	negative regulation of cellular amide metabolic process	biological_process	0.60209	1	2	2861	16	24160	gene-KI387_022303,gene-KI387_010359
GO:0046351	disaccharide biosynthetic process	biological_process	0.60242	1	3	2861	22	24160	gene-KI387_023610,Novel02995,Novel04174
GO:0140142	nucleocytoplasmic carrier activity	molecular_function	0.60324	1	2	2861	15	24160	gene-KI387_028993,gene-KI387_023243
GO:0017108	5-flap endonuclease activity	molecular_function	0.60364	1	1	2861	7	24160	gene-KI387_026395
GO:0033557	Slx1-Slx4 complex	cellular_component	0.60364	1	1	2861	7	24160	gene-KI387_026395
GO:0048256	flap endonuclease activity	molecular_function	0.60364	1	1	2861	7	24160	gene-KI387_026395
GO:0006414	translational elongation	biological_process	0.60411	1	4	2861	33	24160	gene-KI387_015500,Novel01393,Novel02114,Novel04166
GO:0000075	cell cycle checkpoint	biological_process	0.60438	1	4	2861	35	24160	gene-KI387_016654,gene-KI387_031285,gene-KI387_037640,Novel04146
GO:0051128	regulation of cellular component organization	biological_process	0.60632	1	9	2861	76	24160	gene-KI387_013606,gene-KI387_025940,gene-KI387_026648,gene-KI387_018108,gene-KI387_013946,gene-KI387_015278,Novel05638,Novel03044,gene-KI387_024587
GO:0010876	lipid localization	biological_process	0.60648	1	9	2861	84	24160	gene-KI387_021000,gene-KI387_021407,gene-KI387_034918,Novel03194,gene-KI387_017256,gene-KI387_025372,gene-KI387_022929,gene-KI387_011605,gene-KI387_025953
GO:0006400	tRNA modification	biological_process	0.60649	1	21	2861	162	24160	gene-KI387_023060,gene-KI387_013319,gene-KI387_020169,Novel02060,gene-KI387_010074,gene-KI387_035338,Novel03542,Novel06979,Novel06441,gene-KI387_031942,Novel01209,gene-KI387_027887,gene-KI387_013169,gene-KI387_028329,Novel05393,gene-KI387_028904,gene-KI387_030368,Novel04312,gene-KI387_035702,gene-KI387_025622,Novel05050
GO:0004435	phosphatidylinositol phospholipase C activity	molecular_function	0.60752	1	1	2861	6	24160	Novel06441
GO:0004629	phospholipase C activity	molecular_function	0.60752	1	1	2861	6	24160	Novel06441
GO:0070206	protein trimerization	biological_process	0.60811	1	3	2861	32	24160	gene-KI387_000695,gene-KI387_039858,gene-KI387_023418
GO:0031329	regulation of cellular catabolic process	biological_process	0.61004	1	2	2861	16	24160	gene-KI387_006020,gene-KI387_015068
GO:0030258	lipid modification	biological_process	0.61269	1	6	2861	44	24160	gene-KI387_037443,gene-KI387_022307,gene-KI387_018811,gene-KI387_025667,Novel03842,Novel03644
GO:0009893	positive regulation of metabolic process	biological_process	0.61393	1	11	2861	92	24160	Novel03665,gene-KI387_041113,Novel06186,Novel06145,Novel00067,Novel02565,gene-KI387_037293,gene-KI387_034125,gene-KI387_033210,gene-KI387_037852,gene-KI387_023573
GO:0010604	positive regulation of macromolecule metabolic process	biological_process	0.61393	1	11	2861	92	24160	gene-KI387_037293,gene-KI387_034125,gene-KI387_033210,gene-KI387_023573,gene-KI387_037852,Novel03665,gene-KI387_041113,Novel06145,Novel06186,Novel02565,Novel00067
GO:0030855	epithelial cell differentiation	biological_process	0.61403	1	2	2861	18	24160	Novel01894,Novel01910
GO:0060429	epithelium development	biological_process	0.61403	1	2	2861	18	24160	Novel01910,Novel01894
GO:0004478	methionine adenosyltransferase activity	molecular_function	0.61412	1	1	2861	9	24160	gene-KI387_035662
GO:0006556	S-adenosylmethionine biosynthetic process	biological_process	0.61412	1	1	2861	9	24160	gene-KI387_035662
GO:0046500	S-adenosylmethionine metabolic process	biological_process	0.61412	1	1	2861	9	24160	gene-KI387_035662
GO:0016854	racemase and epimerase activity	molecular_function	0.61443	1	3	2861	25	24160	Novel01329,gene-KI387_022325,Novel06147
GO:1902531	regulation of intracellular signal transduction	biological_process	0.61443	1	5	2861	42	24160	gene-KI387_032037,gene-KI387_030894,Novel00919,gene-KI387_024888,Novel07208
GO:0042816	vitamin B6 metabolic process	biological_process	0.61495	1	1	2861	6	24160	Novel05221
GO:0042819	vitamin B6 biosynthetic process	biological_process	0.61495	1	1	2861	6	24160	Novel05221
GO:0051180	vitamin transport	biological_process	0.61522	1	2	2861	15	24160	gene-KI387_011451,Novel06552
GO:0009401	phosphoenolpyruvate-dependent sugar phosphotransferase system	biological_process	0.61533	1	4	2861	38	24160	gene-KI387_010382,gene-KI387_009565,gene-KI387_011370,gene-KI387_015120
GO:0031011	Ino80 complex	cellular_component	0.61639	1	1	2861	6	24160	gene-KI387_008890
GO:0097346	INO80-type complex	cellular_component	0.61639	1	1	2861	6	24160	gene-KI387_008890
GO:0042127	regulation of cell population proliferation	biological_process	0.61774	1	1	2861	11	24160	Novel03286
GO:0005539	glycosaminoglycan binding	molecular_function	0.61783	1	2	2861	16	24160	gene-KI387_027885,gene-KI387_030748
GO:0016125	sterol metabolic process	biological_process	0.61814	1	1	2861	8	24160	gene-KI387_004989
GO:0005991	trehalose metabolic process	biological_process	0.61926	1	3	2861	22	24160	gene-KI387_023610,Novel04174,Novel02995
GO:0015370	solute:sodium symporter activity	molecular_function	0.61969	1	1	2861	6	24160	gene-KI387_026642
GO:0004650	polygalacturonase activity	molecular_function	0.62008	1	4	2861	31	24160	gene-KI387_028091,gene-KI387_007210,gene-KI387_039631,gene-KI387_007211
GO:0042301	phosphate ion binding	molecular_function	0.62049	1	1	2861	7	24160	Novel03004
GO:0030414	peptidase inhibitor activity	molecular_function	0.62078	1	7	2861	67	24160	gene-KI387_005704,Novel01962,gene-KI387_005305,Novel00176,Novel04537,Novel00031,gene-KI387_012618
GO:0061134	peptidase regulator activity	molecular_function	0.62078	1	7	2861	67	24160	Novel00031,gene-KI387_012618,Novel01962,gene-KI387_005704,Novel00176,gene-KI387_005305,Novel04537
GO:0004451	isocitrate lyase activity	molecular_function	0.62176	1	1	2861	7	24160	gene-KI387_022829
GO:0008083	growth factor activity	molecular_function	0.62201	1	5	2861	49	24160	Novel03153,gene-KI387_016343,gene-KI387_006164,gene-KI387_014392,gene-KI387_008327
GO:0043647	inositol phosphate metabolic process	biological_process	0.62235	1	1	2861	9	24160	gene-KI387_005875
GO:0009733	response to auxin	biological_process	0.62253	1	3	2861	35	24160	Novel07003,gene-KI387_035506,gene-KI387_008718
GO:0015749	monosaccharide transmembrane transport	biological_process	0.62351	1	1	2861	6	24160	Novel06919
GO:0009116	nucleoside metabolic process	biological_process	0.62353	1	7	2861	55	24160	gene-KI387_015278,gene-KI387_032167,gene-KI387_032154,gene-KI387_018359,gene-KI387_001029,gene-KI387_032146,gene-KI387_044433
GO:1901657	glycosyl compound metabolic process	biological_process	0.62353	1	7	2861	55	24160	gene-KI387_015278,gene-KI387_032167,gene-KI387_032154,gene-KI387_032146,gene-KI387_044433,gene-KI387_001029,gene-KI387_018359
GO:0005049	nuclear export signal receptor activity	molecular_function	0.62404	1	1	2861	8	24160	gene-KI387_028993
GO:0060090	molecular adaptor activity	molecular_function	0.62413	1	3	2861	26	24160	gene-KI387_025265,gene-KI387_011898,gene-KI387_015119
GO:0016661	oxidoreductase activity, acting on other nitrogenous compounds as donors	molecular_function	0.62422	1	1	2861	7	24160	gene-KI387_023251
GO:0098809	nitrite reductase activity	molecular_function	0.62422	1	1	2861	7	24160	gene-KI387_023251
GO:1901565	organonitrogen compound catabolic process	biological_process	0.62427	1	29	2861	257	24160	gene-KI387_026926,gene-KI387_019179,gene-KI387_014523,gene-KI387_033828,gene-KI387_014524,gene-KI387_017214,gene-KI387_003034,gene-KI387_000778,gene-KI387_019587,gene-KI387_022673,gene-KI387_040659,Novel06949,gene-KI387_025337,gene-KI387_027427,Novel04517,gene-KI387_018661,gene-KI387_014522,gene-KI387_010648,gene-KI387_017117,gene-KI387_022309,gene-KI387_032870,Novel04287,gene-KI387_024903,gene-K…
GO:0005272	sodium channel activity	molecular_function	0.62453	1	1	2861	6	24160	Novel05763
GO:0016032	viral process	biological_process	0.6246	1	58	2861	495	24160	Novel04200,gene-KI387_025078,gene-KI387_026395,gene-KI387_034356,gene-KI387_032540,gene-KI387_032496,Novel02096,gene-KI387_000034,Novel04373,gene-KI387_025090,Novel00988,gene-KI387_039451,gene-KI387_035566,gene-KI387_029908,gene-KI387_025096,Novel03018,Novel04072,Novel03314,gene-KI387_017667,gene-KI387_010838,gene-KI387_002547,gene-KI387_018864,gene-KI387_010283,gene-KI387_034994,gene-KI387_02792…
GO:0004425	indole-3-glycerol-phosphate synthase activity	molecular_function	0.62491	1	1	2861	6	24160	Novel06186
GO:0019072	viral genome packaging	biological_process	0.62497	1	3	2861	28	24160	gene-KI387_032496,Novel04200,gene-KI387_025078
GO:0016790	thiolester hydrolase activity	molecular_function	0.62507	1	4	2861	38	24160	gene-KI387_028051,gene-KI387_025021,gene-KI387_028053,Novel03524
GO:0044087	regulation of cellular component biogenesis	biological_process	0.62648	1	4	2861	37	24160	gene-KI387_025940,gene-KI387_015278,gene-KI387_026648,gene-KI387_018108
GO:0031124	mRNA 3-end processing	biological_process	0.62676	1	2	2861	15	24160	gene-KI387_028019,gene-KI387_003569
GO:0004332	fructose-bisphosphate aldolase activity	molecular_function	0.62749	1	1	2861	9	24160	gene-KI387_027838
GO:0006821	chloride transport	biological_process	0.62767	1	3	2861	23	24160	Novel01258,gene-KI387_008890,gene-KI387_014593
GO:0000977	RNA polymerase II transcription regulatory region sequence-specific DNA binding	molecular_function	0.62881	1	1	2861	8	24160	Novel02499
GO:0016846	carbon-sulfur lyase activity	molecular_function	0.62883	1	3	2861	29	24160	Novel05969,gene-KI387_007321,gene-KI387_008689
GO:0009056	catabolic process	biological_process	0.6289	1	69	2861	596	24160	gene-KI387_023931,gene-KI387_003034,gene-KI387_014524,gene-KI387_017214,gene-KI387_037910,gene-KI387_033828,gene-KI387_008361,gene-KI387_005875,gene-KI387_024903,gene-KI387_006020,gene-KI387_001747,gene-KI387_022759,gene-KI387_019276,gene-KI387_000234,gene-KI387_000778,gene-KI387_014166,gene-KI387_001502,gene-KI387_023418,gene-KI387_014511,gene-KI387_018661,gene-KI387_013015,gene-KI387_037443,Nov…
GO:0015969	guanosine tetraphosphate metabolic process	biological_process	0.62895	1	1	2861	6	24160	gene-KI387_015278
GO:0034035	purine ribonucleoside bisphosphate metabolic process	biological_process	0.62895	1	1	2861	6	24160	gene-KI387_015278
GO:0044403	symbiotic process	biological_process	0.63092	1	65	2861	552	24160	gene-KI387_002763,Novel01143,gene-KI387_000035,gene-KI387_013795,Novel02818,gene-KI387_013495,gene-KI387_025236,Novel03004,gene-KI387_010228,Novel01440,gene-KI387_025953,gene-KI387_008394,gene-KI387_025770,Novel03018,Novel04072,Novel03314,gene-KI387_032496,gene-KI387_032540,Novel04373,Novel00988,gene-KI387_039451,Novel04200,gene-KI387_025078,gene-KI387_027591,gene-KI387_033897,gene-KI387_017481,g…
GO:0000413	protein peptidyl-prolyl isomerization	biological_process	0.63198	1	3	2861	29	24160	gene-KI387_032212,gene-KI387_001943,Novel02829
GO:0018208	peptidyl-proline modification	biological_process	0.63198	1	3	2861	29	24160	Novel02829,gene-KI387_001943,gene-KI387_032212
GO:0044419	interspecies interaction between organisms	biological_process	0.63221	1	127	2861	1114	24160	Novel03059,gene-KI387_038076,gene-KI387_039542,Novel05014,gene-KI387_018047,gene-KI387_033567,gene-KI387_022648,gene-KI387_020684,Novel07230,Novel03542,gene-KI387_004914,gene-KI387_033634,Novel00847,gene-KI387_033682,gene-KI387_027955,Novel03286,gene-KI387_036186,gene-KI387_023725,gene-KI387_022654,gene-KI387_006774,gene-KI387_019300,Novel00004,gene-KI387_026381,gene-KI387_024903,Novel04378,gene-…
GO:0030682	mitigation of host defenses by symbiont	biological_process	0.63294	1	2	2861	14	24160	gene-KI387_033897,gene-KI387_030950
GO:0006022	aminoglycan metabolic process	biological_process	0.63307	1	6	2861	59	24160	gene-KI387_014524,gene-KI387_027427,gene-KI387_014523,gene-KI387_019179,gene-KI387_014522,gene-KI387_020640
GO:0042597	periplasmic space	cellular_component	0.63312	1	2	2861	18	24160	gene-KI387_033671,gene-KI387_034464
GO:0016987	sigma factor activity	molecular_function	0.63344	1	4	2861	36	24160	Novel02565,gene-KI387_036740,Novel07508,gene-KI387_011802
GO:0006366	transcription by RNA polymerase II	biological_process	0.63363	1	21	2861	187	24160	gene-KI387_001578,Novel02565,gene-KI387_025940,Novel05975,gene-KI387_016525,Novel02886,gene-KI387_027350,gene-KI387_001644,gene-KI387_028107,gene-KI387_037852,gene-KI387_030371,gene-KI387_013082,Novel04174,gene-KI387_016802,Novel02269,gene-KI387_039405,gene-KI387_041113,gene-KI387_007280,gene-KI387_013224,gene-KI387_010824,gene-KI387_019594
GO:0030008	TRAPP complex	cellular_component	0.63756	1	1	2861	11	24160	gene-KI387_032037
GO:0006397	mRNA processing	biological_process	0.63763	1	18	2861	146	24160	gene-KI387_030994,Novel02313,gene-KI387_035697,gene-KI387_032225,Novel06873,gene-KI387_037399,gene-KI387_037564,gene-KI387_020237,gene-KI387_020214,gene-KI387_014494,gene-KI387_003569,gene-KI387_025327,gene-KI387_000026,gene-KI387_008356,Novel01373,gene-KI387_008031,gene-KI387_028019,Novel06516
GO:0009297	pilus assembly	biological_process	0.63793	1	1	2861	8	24160	Novel07508
GO:0043711	pilus organization	biological_process	0.63793	1	1	2861	8	24160	Novel07508
GO:0050801	ion homeostasis	biological_process	0.63801	1	6	2861	56	24160	Novel06197,gene-KI387_025376,gene-KI387_005247,gene-KI387_033736,gene-KI387_033175,gene-KI387_029517
GO:0055080	cation homeostasis	biological_process	0.63801	1	6	2861	56	24160	gene-KI387_033175,gene-KI387_033736,gene-KI387_029517,Novel06197,gene-KI387_005247,gene-KI387_025376
GO:0098771	inorganic ion homeostasis	biological_process	0.63801	1	6	2861	56	24160	Novel06197,gene-KI387_005247,gene-KI387_025376,gene-KI387_033736,gene-KI387_033175,gene-KI387_029517
GO:0005789	endoplasmic reticulum membrane	cellular_component	0.63861	1	24	2861	216	24160	Novel02306,Novel05969,gene-KI387_030500,gene-KI387_031655,gene-KI387_012544,gene-KI387_037852,gene-KI387_042546,gene-KI387_023573,Novel07508,gene-KI387_020056,gene-KI387_002517,Novel00724,gene-KI387_016146,Novel00743,gene-KI387_015729,Novel01404,Novel06238,gene-KI387_032657,gene-KI387_018291,Novel02199,gene-KI387_025078,gene-KI387_030994,gene-KI387_032237,Novel01051
GO:0007275	multicellular organism development	biological_process	0.63981	1	25	2861	210	24160	Novel03431,gene-KI387_034277,gene-KI387_015378,Novel02153,Novel06589,gene-KI387_015386,gene-KI387_003034,Novel02989,gene-KI387_017214,gene-KI387_037459,gene-KI387_033088,Novel02313,gene-KI387_021300,gene-KI387_014109,gene-KI387_015382,gene-KI387_005045,gene-KI387_026504,gene-KI387_013946,gene-KI387_020656,gene-KI387_012666,gene-KI387_022303,gene-KI387_026490,gene-KI387_015750,gene-KI387_000234,No…
GO:0016301	kinase activity	molecular_function	0.64017	1	217	2861	1585	24160	gene-KI387_016973,gene-KI387_020169,gene-KI387_012326,gene-KI387_008999,Novel00838,Novel04775,Novel07210,gene-KI387_012040,Novel06149,gene-KI387_035519,gene-KI387_010359,gene-KI387_025096,gene-KI387_035643,gene-KI387_000049,gene-KI387_020237,gene-KI387_031942,gene-KI387_033474,gene-KI387_038705,gene-KI387_017807,gene-KI387_001618,gene-KI387_021665,gene-KI387_014752,gene-KI387_011870,gene-KI387_00…
GO:0005102	signaling receptor binding	molecular_function	0.64074	1	40	2861	357	24160	gene-KI387_025877,gene-KI387_003855,gene-KI387_016343,gene-KI387_031663,gene-KI387_006020,gene-KI387_005255,gene-KI387_025953,gene-KI387_013415,gene-KI387_011870,gene-KI387_013319,gene-KI387_008575,gene-KI387_009529,gene-KI387_024888,Novel02153,Novel03153,gene-KI387_015750,gene-KI387_017882,gene-KI387_041451,Novel00919,gene-KI387_015120,Novel06197,gene-KI387_023573,gene-KI387_014392,gene-KI387_00…
GO:0019954	asexual reproduction	biological_process	0.6422	1	11	2861	120	24160	gene-KI387_038813,gene-KI387_017941,gene-KI387_004093,gene-KI387_015119,gene-KI387_038708,Novel01116,gene-KI387_011014,gene-KI387_035503,gene-KI387_037852,gene-KI387_019667,gene-KI387_022315
GO:0006750	glutathione biosynthetic process	biological_process	0.64442	1	2	2861	18	24160	Novel01742,gene-KI387_003205
GO:0036452	ESCRT complex	cellular_component	0.64546	1	1	2861	7	24160	Novel02448
GO:0099513	polymeric cytoskeletal fiber	cellular_component	0.64587	1	4	2861	39	24160	gene-KI387_029360,gene-KI387_029453,gene-KI387_041100,gene-KI387_015766
GO:0004556	alpha-amylase activity	molecular_function	0.64603	1	1	2861	7	24160	gene-KI387_039683
GO:0043605	cellular amide catabolic process	biological_process	0.6464	1	1	2861	6	24160	Novel05483
GO:0019205	nucleobase-containing compound kinase activity	molecular_function	0.64648	1	6	2861	50	24160	gene-KI387_011451,gene-KI387_006189,gene-KI387_000049,Novel03542,gene-KI387_025622,gene-KI387_038045
GO:0006027	glycosaminoglycan catabolic process	biological_process	0.64709	1	1	2861	10	24160	gene-KI387_020640
GO:0009253	peptidoglycan catabolic process	biological_process	0.64709	1	1	2861	10	24160	gene-KI387_020640
GO:0061783	peptidoglycan muralytic activity	molecular_function	0.64709	1	1	2861	10	24160	gene-KI387_020640
GO:0044743	protein transmembrane import into intracellular organelle	biological_process	0.64733	1	3	2861	24	24160	gene-KI387_039966,gene-KI387_022317,gene-KI387_002463
GO:0004140	dephospho-CoA kinase activity	molecular_function	0.64751	1	1	2861	10	24160	gene-KI387_025622
GO:0009063	cellular amino acid catabolic process	biological_process	0.6477	1	4	2861	34	24160	gene-KI387_040659,gene-KI387_026926,Novel04517,gene-KI387_010648
GO:0043648	dicarboxylic acid metabolic process	biological_process	0.64779	1	5	2861	50	24160	gene-KI387_006893,Novel04058,Novel06147,gene-KI387_033078,gene-KI387_034132
GO:0004527	exonuclease activity	molecular_function	0.64784	1	14	2861	115	24160	gene-KI387_016802,gene-KI387_005814,gene-KI387_026959,gene-KI387_034994,gene-KI387_002293,gene-KI387_021000,gene-KI387_025960,gene-KI387_005255,gene-KI387_028107,gene-KI387_014886,gene-KI387_015456,gene-KI387_002882,gene-KI387_015447,gene-KI387_026729
GO:0003824	catalytic activity	molecular_function	0.64822	1	1486	2861	12101	24160	gene-KI387_012076,Novel07598,gene-KI387_008992,Novel06147,gene-KI387_034704,gene-KI387_033992,Novel06980,Novel02670,gene-KI387_025674,Novel02647,gene-KI387_015830,gene-KI387_034217,gene-KI387_021000,gene-KI387_025754,gene-KI387_019348,gene-KI387_037130,gene-KI387_000510,gene-KI387_007383,gene-KI387_005498,gene-KI387_026091,Novel01374,gene-KI387_014511,gene-KI387_035694,gene-KI387_028473,gene-KI38…
GO:0043038	amino acid activation	biological_process	0.64889	1	15	2861	120	24160	Novel00820,gene-KI387_033216,Novel05363,gene-KI387_009501,Novel02886,gene-KI387_024913,Novel07127,Novel02670,gene-KI387_025157,gene-KI387_014733,Novel06058,gene-KI387_035795,gene-KI387_008045,gene-KI387_023779,gene-KI387_017606
GO:0043039	tRNA aminoacylation	biological_process	0.64889	1	15	2861	120	24160	Novel02886,gene-KI387_009501,gene-KI387_033216,Novel05363,Novel00820,Novel07127,Novel02670,gene-KI387_024913,gene-KI387_014733,gene-KI387_025157,gene-KI387_017606,gene-KI387_008045,gene-KI387_023779,gene-KI387_035795,Novel06058
GO:0031554	regulation of DNA-templated transcription, termination	biological_process	0.64944	1	1	2861	7	24160	gene-KI387_024587
GO:0007217	tachykinin receptor signaling pathway	biological_process	0.6499	1	1	2861	7	24160	Novel06199
GO:0008235	metalloexopeptidase activity	molecular_function	0.65008	1	1	2861	8	24160	gene-KI387_003251
GO:0016559	peroxisome fission	biological_process	0.65012	1	1	2861	7	24160	Novel03446
GO:0030269	tetrahydromethanopterin S-methyltransferase activity	molecular_function	0.65057	1	2	2861	20	24160	gene-KI387_000492,gene-KI387_016838
GO:0042086	5-methyl-5,6,7,8-tetrahydromethanopterin-dependent methyltransferase activity	molecular_function	0.65057	1	2	2861	20	24160	gene-KI387_000492,gene-KI387_016838
GO:1901642	nucleoside transmembrane transport	biological_process	0.65074	1	1	2861	9	24160	gene-KI387_023071
GO:0003860	3-hydroxyisobutyryl-CoA hydrolase activity	molecular_function	0.65083	1	3	2861	29	24160	gene-KI387_028053,Novel03524,gene-KI387_028051
GO:0016289	CoA hydrolase activity	molecular_function	0.65083	1	3	2861	29	24160	gene-KI387_028053,Novel03524,gene-KI387_028051
GO:0005885	Arp2/3 protein complex	cellular_component	0.65106	1	1	2861	10	24160	gene-KI387_025940
GO:0030838	positive regulation of actin filament polymerization	biological_process	0.65106	1	1	2861	10	24160	gene-KI387_025940
GO:0031334	positive regulation of protein-containing complex assembly	biological_process	0.65106	1	1	2861	10	24160	gene-KI387_025940
GO:0032273	positive regulation of protein polymerization	biological_process	0.65106	1	1	2861	10	24160	gene-KI387_025940
GO:0034314	Arp2/3 complex-mediated actin nucleation	biological_process	0.65106	1	1	2861	10	24160	gene-KI387_025940
GO:0044089	positive regulation of cellular component biogenesis	biological_process	0.65106	1	1	2861	10	24160	gene-KI387_025940
GO:0045010	actin nucleation	biological_process	0.65106	1	1	2861	10	24160	gene-KI387_025940
GO:1902905	positive regulation of supramolecular fiber organization	biological_process	0.65106	1	1	2861	10	24160	gene-KI387_025940
GO:0000428	DNA-directed RNA polymerase complex	cellular_component	0.65122	1	9	2861	82	24160	gene-KI387_010824,gene-KI387_014286,gene-KI387_014278,Novel02886,gene-KI387_001578,gene-KI387_005247,gene-KI387_030371,Novel02662,gene-KI387_025103
GO:0055029	nuclear DNA-directed RNA polymerase complex	cellular_component	0.65122	1	9	2861	82	24160	gene-KI387_030371,Novel02662,gene-KI387_025103,Novel02886,gene-KI387_001578,gene-KI387_005247,gene-KI387_010824,gene-KI387_014278,gene-KI387_014286
GO:0015077	monovalent inorganic cation transmembrane transporter activity	molecular_function	0.6514	1	50	2861	419	24160	gene-KI387_012544,Novel05763,gene-KI387_022986,gene-KI387_023574,gene-KI387_009073,gene-KI387_007364,gene-KI387_025940,Novel01457,Novel06978,Novel05469,gene-KI387_015120,Novel01759,Novel06026,gene-KI387_004834,gene-KI387_002037,gene-KI387_015726,gene-KI387_001423,gene-KI387_026091,gene-KI387_038094,gene-KI387_033806,gene-KI387_026642,gene-KI387_032296,gene-KI387_008310,gene-KI387_030440,gene-KI38…
GO:0000778	condensed nuclear chromosome kinetochore	cellular_component	0.65188	1	6	2861	64	24160	gene-KI387_023468,gene-KI387_042546,gene-KI387_034863,gene-KI387_000228,gene-KI387_019655,gene-KI387_015120
GO:0000780	condensed nuclear chromosome, centromeric region	cellular_component	0.65188	1	6	2861	64	24160	gene-KI387_023468,gene-KI387_042546,gene-KI387_034863,gene-KI387_000228,gene-KI387_019655,gene-KI387_015120
GO:0048468	cell development	biological_process	0.65231	1	5	2861	46	24160	Novel03431,gene-KI387_026490,Novel01910,Novel01894,gene-KI387_013946
GO:0046164	alcohol catabolic process	biological_process	0.65241	1	1	2861	10	24160	gene-KI387_005875
GO:0046174	polyol catabolic process	biological_process	0.65241	1	1	2861	10	24160	gene-KI387_005875
GO:1901616	organic hydroxy compound catabolic process	biological_process	0.65241	1	1	2861	10	24160	gene-KI387_005875
GO:0006360	transcription by RNA polymerase I	biological_process	0.65247	1	1	2861	10	24160	gene-KI387_017757
GO:0015931	nucleobase-containing compound transport	biological_process	0.65345	1	10	2861	85	24160	gene-KI387_023851,gene-KI387_019052,gene-KI387_037293,Novel02016,Novel03889,Novel04773,gene-KI387_035603,gene-KI387_026395,gene-KI387_023071,Novel04351
GO:0019953	sexual reproduction	biological_process	0.65443	1	9	2861	80	24160	Novel01894,Novel05041,gene-KI387_038128,Novel02371,gene-KI387_010573,Novel04768,gene-KI387_030725,gene-KI387_024131,Novel06552
GO:0044703	multi-organism reproductive process	biological_process	0.65443	1	9	2861	80	24160	Novel01894,Novel05041,gene-KI387_038128,Novel02371,gene-KI387_010573,Novel04768,gene-KI387_030725,gene-KI387_024131,Novel06552
GO:0003849	3-deoxy-7-phosphoheptulonate synthase activity	molecular_function	0.65492	1	1	2861	7	24160	gene-KI387_031368
GO:0071310	cellular response to organic substance	biological_process	0.65542	1	5	2861	43	24160	Novel04360,gene-KI387_027035,gene-KI387_020416,gene-KI387_030894,gene-KI387_022918
GO:0005875	microtubule associated complex	cellular_component	0.65557	1	6	2861	57	24160	gene-KI387_035631,Novel01094,Novel03993,Novel03340,Novel02028,gene-KI387_026029
GO:0071495	cellular response to endogenous stimulus	biological_process	0.65768	1	3	2861	28	24160	gene-KI387_020416,Novel04360,gene-KI387_027035
GO:0016071	mRNA metabolic process	biological_process	0.65798	1	24	2861	195	24160	gene-KI387_025327,gene-KI387_003569,gene-KI387_014494,gene-KI387_019276,gene-KI387_020214,gene-KI387_020237,Novel06516,gene-KI387_028019,gene-KI387_008031,Novel01373,gene-KI387_008356,gene-KI387_037852,Novel02084,gene-KI387_000026,gene-KI387_032349,gene-KI387_032225,gene-KI387_035697,Novel02313,gene-KI387_010975,gene-KI387_030994,gene-KI387_037399,gene-KI387_037564,gene-KI387_037910,Novel06873
GO:0016670	oxidoreductase activity, acting on a sulfur group of donors, oxygen as acceptor	molecular_function	0.65896	1	2	2861	17	24160	gene-KI387_009470,gene-KI387_038993
GO:0002694	regulation of leukocyte activation	biological_process	0.65969	1	1	2861	7	24160	gene-KI387_018245
GO:0050865	regulation of cell activation	biological_process	0.65969	1	1	2861	7	24160	gene-KI387_018245
GO:0051249	regulation of lymphocyte activation	biological_process	0.65969	1	1	2861	7	24160	gene-KI387_018245
GO:0006613	cotranslational protein targeting to membrane	biological_process	0.6607	1	8	2861	70	24160	gene-KI387_035637,gene-KI387_002012,gene-KI387_005548,gene-KI387_027956,gene-KI387_021013,gene-KI387_033192,gene-KI387_036854,gene-KI387_016272
GO:0006614	SRP-dependent cotranslational protein targeting to membrane	biological_process	0.6607	1	8	2861	70	24160	gene-KI387_021013,gene-KI387_033192,gene-KI387_036854,gene-KI387_016272,gene-KI387_035637,gene-KI387_002012,gene-KI387_005548,gene-KI387_027956
GO:0140103	catalytic activity, acting on a glycoprotein	molecular_function	0.66081	1	3	2861	30	24160	Novel06027,gene-KI387_024368,Novel01393
GO:0060589	nucleoside-triphosphatase regulator activity	molecular_function	0.66137	1	11	2861	104	24160	Novel02613,gene-KI387_038049,gene-KI387_006717,gene-KI387_039683,gene-KI387_002356,gene-KI387_006164,Novel03286,gene-KI387_003620,gene-KI387_032288,gene-KI387_039451,gene-KI387_039738
GO:0044085	cellular component biogenesis	biological_process	0.66219	1	79	2861	732	24160	gene-KI387_023418,gene-KI387_006085,gene-KI387_002957,Novel03150,gene-KI387_000695,Novel06167,gene-KI387_030199,gene-KI387_017941,gene-KI387_025265,gene-KI387_015456,gene-KI387_035503,gene-KI387_034765,gene-KI387_014403,gene-KI387_031520,gene-KI387_020237,gene-KI387_031942,gene-KI387_025940,gene-KI387_016651,gene-KI387_037906,Novel07508,gene-KI387_008992,Novel06909,gene-KI387_015196,gene-KI387_01…
GO:0006778	porphyrin-containing compound metabolic process	biological_process	0.66237	1	6	2861	48	24160	Novel05615,gene-KI387_033828,Novel04287,gene-KI387_034877,gene-KI387_017117,gene-KI387_019587
GO:0120009	intermembrane lipid transfer	biological_process	0.66265	1	1	2861	9	24160	gene-KI387_034918
GO:0120013	lipid transfer activity	molecular_function	0.66265	1	1	2861	9	24160	gene-KI387_034918
GO:0008080	N-acetyltransferase activity	molecular_function	0.66271	1	8	2861	66	24160	gene-KI387_032314,Novel01823,gene-KI387_037287,gene-KI387_022806,gene-KI387_016067,Novel05471,Novel05882,gene-KI387_026802
GO:0016634	oxidoreductase activity, acting on the CH-CH group of donors, oxygen as acceptor	molecular_function	0.66347	1	1	2861	8	24160	gene-KI387_037443
GO:0044282	small molecule catabolic process	biological_process	0.66408	1	7	2861	61	24160	gene-KI387_010648,Novel05483,Novel04517,gene-KI387_037443,gene-KI387_026926,gene-KI387_005875,gene-KI387_040659
GO:0008200	ion channel inhibitor activity	molecular_function	0.66525	1	7	2861	63	24160	gene-KI387_010241,gene-KI387_033567,gene-KI387_012537,Novel07230,gene-KI387_038076,Novel05014,gene-KI387_012289
GO:0016248	channel inhibitor activity	molecular_function	0.66525	1	7	2861	63	24160	Novel05014,gene-KI387_012289,Novel07230,gene-KI387_012537,gene-KI387_038076,gene-KI387_010241,gene-KI387_033567
GO:0004803	transposase activity	molecular_function	0.66667	1	3	2861	32	24160	Novel07201,gene-KI387_035566,gene-KI387_020289
GO:0005777	peroxisome	cellular_component	0.66688	1	4	2861	34	24160	gene-KI387_011378,Novel03446,gene-KI387_037443,gene-KI387_006148
GO:0042579	microbody	cellular_component	0.66688	1	4	2861	34	24160	Novel03446,gene-KI387_037443,gene-KI387_006148,gene-KI387_011378
GO:0042803	protein homodimerization activity	molecular_function	0.66743	1	7	2861	65	24160	gene-KI387_020056,gene-KI387_003620,Novel05896,gene-KI387_015456,gene-KI387_037852,gene-KI387_038049,gene-KI387_016802
GO:0000270	peptidoglycan metabolic process	biological_process	0.66744	1	1	2861	11	24160	gene-KI387_020640
GO:0016307	phosphatidylinositol phosphate kinase activity	molecular_function	0.66778	1	1	2861	6	24160	gene-KI387_029961
GO:0019069	viral capsid assembly	biological_process	0.66913	1	3	2861	30	24160	gene-KI387_025953,gene-KI387_036186,gene-KI387_025090
GO:0009628	response to abiotic stimulus	biological_process	0.66939	1	5	2861	50	24160	gene-KI387_025877,Novel06327,gene-KI387_021666,gene-KI387_029371,gene-KI387_031663
GO:0006370	7-methylguanosine mRNA capping	biological_process	0.66945	1	1	2861	8	24160	gene-KI387_014494
GO:0003924	GTPase activity	molecular_function	0.66948	1	65	2861	511	24160	gene-KI387_023573,gene-KI387_027932,gene-KI387_012064,Novel05050,Novel00601,gene-KI387_019050,gene-KI387_015674,gene-KI387_039204,gene-KI387_033085,gene-KI387_027917,gene-KI387_020471,Novel03044,gene-KI387_003803,gene-KI387_031524,gene-KI387_012915,gene-KI387_015115,Novel04200,gene-KI387_021115,gene-KI387_027910,gene-KI387_030748,gene-KI387_032739,gene-KI387_042849,gene-KI387_041370,gene-KI387_03…
GO:0009141	nucleoside triphosphate metabolic process	biological_process	0.66971	1	13	2861	122	24160	gene-KI387_014800,gene-KI387_012076,gene-KI387_002697,gene-KI387_008361,gene-KI387_025953,gene-KI387_007364,gene-KI387_001502,gene-KI387_025940,gene-KI387_007107,Novel02292,Novel00554,Novel01457,gene-KI387_024034
GO:0042168	heme metabolic process	biological_process	0.66972	1	1	2861	8	24160	gene-KI387_017117
GO:0005217	intracellular ligand-gated ion channel activity	molecular_function	0.67028	1	3	2861	29	24160	gene-KI387_005247,gene-KI387_033736,gene-KI387_033175
GO:0005219	ryanodine-sensitive calcium-release channel activity	molecular_function	0.67028	1	3	2861	29	24160	gene-KI387_005247,gene-KI387_033175,gene-KI387_033736
GO:0015278	calcium-release channel activity	molecular_function	0.67028	1	3	2861	29	24160	gene-KI387_033175,gene-KI387_033736,gene-KI387_005247
GO:0099094	ligand-gated cation channel activity	molecular_function	0.67028	1	3	2861	29	24160	gene-KI387_033736,gene-KI387_033175,gene-KI387_005247
GO:0099604	ligand-gated calcium channel activity	molecular_function	0.67028	1	3	2861	29	24160	gene-KI387_033736,gene-KI387_033175,gene-KI387_005247
GO:0007631	feeding behavior	biological_process	0.67175	1	1	2861	9	24160	gene-KI387_023507
GO:0006040	amino sugar metabolic process	biological_process	0.67261	1	5	2861	50	24160	gene-KI387_014522,gene-KI387_014523,gene-KI387_019179,gene-KI387_027427,gene-KI387_014524
GO:0046700	heterocycle catabolic process	biological_process	0.67343	1	11	2861	95	24160	gene-KI387_019276,gene-KI387_017117,gene-KI387_026959,gene-KI387_019587,gene-KI387_001502,gene-KI387_008361,Novel02084,Novel04287,gene-KI387_033828,gene-KI387_033078,gene-KI387_037910
GO:0034508	centromere complex assembly	biological_process	0.67378	1	6	2861	59	24160	gene-KI387_024161,gene-KI387_029831,gene-KI387_010283,gene-KI387_019400,gene-KI387_003620,Novel04360
GO:0006826	iron ion transport	biological_process	0.67457	1	3	2861	25	24160	gene-KI387_037724,gene-KI387_032382,Novel07197
GO:0030145	manganese ion binding	molecular_function	0.67511	1	2	2861	20	24160	gene-KI387_007063,gene-KI387_039710
GO:0005741	mitochondrial outer membrane	cellular_component	0.67536	1	8	2861	76	24160	gene-KI387_022317,gene-KI387_002463,gene-KI387_036846,gene-KI387_020471,gene-KI387_022676,gene-KI387_007321,gene-KI387_021916,gene-KI387_039966
GO:0031968	organelle outer membrane	cellular_component	0.67536	1	8	2861	76	24160	gene-KI387_036846,gene-KI387_022317,gene-KI387_002463,gene-KI387_007321,gene-KI387_039966,gene-KI387_021916,gene-KI387_022676,gene-KI387_020471
GO:0016197	endosomal transport	biological_process	0.67542	1	2	2861	15	24160	Novel06226,gene-KI387_030668
GO:0005615	extracellular space	cellular_component	0.67599	1	12	2861	125	24160	gene-KI387_013607,gene-KI387_027771,gene-KI387_015068,gene-KI387_005255,gene-KI387_025953,gene-KI387_013415,Novel04720,gene-KI387_003620,gene-KI387_034743,gene-KI387_011870,gene-KI387_006020,gene-KI387_015120
GO:0051656	establishment of organelle localization	biological_process	0.67601	1	1	2861	8	24160	gene-KI387_018789
GO:2000026	regulation of multicellular organismal development	biological_process	0.67621	1	3	2861	23	24160	gene-KI387_033088,Novel02989,gene-KI387_015750
GO:0061608	nuclear import signal receptor activity	molecular_function	0.67646	1	1	2861	7	24160	gene-KI387_023243
GO:0008138	protein tyrosine/serine/threonine phosphatase activity	molecular_function	0.67759	1	3	2861	25	24160	gene-KI387_014494,gene-KI387_038993,Novel05014
GO:0052173	response to defenses of other organism	biological_process	0.67845	1	2	2861	15	24160	gene-KI387_030950,gene-KI387_033897
GO:0052200	response to host defenses	biological_process	0.67845	1	2	2861	15	24160	gene-KI387_033897,gene-KI387_030950
GO:0075136	response to host	biological_process	0.67845	1	2	2861	15	24160	gene-KI387_030950,gene-KI387_033897
GO:0005815	microtubule organizing center	cellular_component	0.67846	1	4	2861	36	24160	gene-KI387_026395,Novel02441,gene-KI387_009618,gene-KI387_008605
GO:0050793	regulation of developmental process	biological_process	0.67856	1	4	2861	33	24160	gene-KI387_003620,Novel02989,gene-KI387_015750,gene-KI387_033088
GO:1901698	response to nitrogen compound	biological_process	0.67865	1	1	2861	13	24160	gene-KI387_022719
GO:0031226	intrinsic component of plasma membrane	cellular_component	0.67913	1	9	2861	77	24160	gene-KI387_010355,gene-KI387_008890,gene-KI387_011451,gene-KI387_023071,gene-KI387_021515,gene-KI387_025103,gene-KI387_029517,gene-KI387_003186,gene-KI387_019747
GO:0015298	solute:cation antiporter activity	molecular_function	0.67975	1	3	2861	23	24160	gene-KI387_008310,gene-KI387_008306,gene-KI387_025116
GO:0015299	solute:proton antiporter activity	molecular_function	0.67975	1	3	2861	23	24160	gene-KI387_008306,gene-KI387_025116,gene-KI387_008310
GO:0004664	prephenate dehydratase activity	molecular_function	0.68154	1	1	2861	7	24160	gene-KI387_018788
GO:0009094	L-phenylalanine biosynthetic process	biological_process	0.68154	1	1	2861	7	24160	gene-KI387_018788
GO:1902223	erythrose 4-phosphate/phosphoenolpyruvate family amino acid biosynthetic process	biological_process	0.68154	1	1	2861	7	24160	gene-KI387_018788
GO:0006865	amino acid transport	biological_process	0.68294	1	4	2861	34	24160	gene-KI387_018969,gene-KI387_026642,gene-KI387_027183,gene-KI387_014560
GO:0042274	ribosomal small subunit biogenesis	biological_process	0.68337	1	1	2861	10	24160	gene-KI387_031942
GO:0001401	SAM complex	cellular_component	0.6836	1	1	2861	11	24160	gene-KI387_036846
GO:0098533	ATPase dependent transmembrane transport complex	cellular_component	0.68398	1	1	2861	9	24160	gene-KI387_001044
GO:0016747	transferase activity, transferring acyl groups other than amino-acyl groups	molecular_function	0.68443	1	50	2861	427	24160	gene-KI387_015093,gene-KI387_000918,gene-KI387_001502,gene-KI387_038618,Novel02881,gene-KI387_004196,gene-KI387_034785,gene-KI387_006164,gene-KI387_034722,gene-KI387_012119,Novel06278,gene-KI387_008604,Novel06397,Novel00620,gene-KI387_002529,Novel01823,gene-KI387_022806,gene-KI387_040761,Novel05471,gene-KI387_033185,gene-KI387_001302,gene-KI387_008605,gene-KI387_034705,gene-KI387_032314,Novel0424…
GO:0051051	negative regulation of transport	biological_process	0.68496	1	1	2861	9	24160	Novel06919
GO:0007267	cell-cell signaling	biological_process	0.68529	1	5	2861	46	24160	Novel06427,gene-KI387_015386,Novel06443,gene-KI387_015382,gene-KI387_015378
GO:0002949	tRNA threonylcarbamoyladenosine modification	biological_process	0.68626	1	11	2861	85	24160	Novel06979,gene-KI387_028904,Novel04312,gene-KI387_035338,Novel03542,gene-KI387_025622,gene-KI387_035702,gene-KI387_028329,gene-KI387_031942,gene-KI387_013319,gene-KI387_020169
GO:0070525	tRNA threonylcarbamoyladenosine metabolic process	biological_process	0.68626	1	11	2861	85	24160	gene-KI387_028329,gene-KI387_031942,gene-KI387_013319,gene-KI387_020169,Novel06979,gene-KI387_028904,Novel04312,gene-KI387_035338,Novel03542,gene-KI387_025622,gene-KI387_035702
GO:0001522	pseudouridine synthesis	biological_process	0.68694	1	3	2861	25	24160	gene-KI387_039966,gene-KI387_016651,Novel02505
GO:0000746	conjugation	biological_process	0.68781	1	3	2861	24	24160	Novel04768,Novel06411,Novel05041
GO:0015711	organic anion transport	biological_process	0.68831	1	13	2861	116	24160	gene-KI387_027183,Novel02199,gene-KI387_021407,gene-KI387_011451,Novel03194,gene-KI387_019034,gene-KI387_026642,gene-KI387_015775,gene-KI387_014560,gene-KI387_005704,gene-KI387_018969,gene-KI387_014251,Novel04001
GO:0033013	tetrapyrrole metabolic process	biological_process	0.68884	1	13	2861	119	24160	gene-KI387_019587,gene-KI387_019998,Novel04287,gene-KI387_033828,Novel01963,Novel03075,Novel05615,gene-KI387_032703,gene-KI387_034877,gene-KI387_017117,gene-KI387_020090,Novel07508,gene-KI387_006703
GO:0001501	skeletal system development	biological_process	0.69057	1	1	2861	7	24160	gene-KI387_020656
GO:0051216	cartilage development	biological_process	0.69057	1	1	2861	7	24160	gene-KI387_020656
GO:0061448	connective tissue development	biological_process	0.69057	1	1	2861	7	24160	gene-KI387_020656
GO:0006405	RNA export from nucleus	biological_process	0.69139	1	2	2861	19	24160	Novel03889,gene-KI387_037293
GO:0000123	histone acetyltransferase complex	cellular_component	0.69141	1	2	2861	17	24160	gene-KI387_037293,Novel04181
GO:0003871	5-methyltetrahydropteroyltriglutamate-homocysteine S-methyltransferase activity	molecular_function	0.69149	1	1	2861	7	24160	gene-KI387_026015
GO:0042085	5-methyltetrahydropteroyltri-L-glutamate-dependent methyltransferase activity	molecular_function	0.69149	1	1	2861	7	24160	gene-KI387_026015
GO:0007127	meiosis I	biological_process	0.69161	1	2	2861	20	24160	gene-KI387_008992,gene-KI387_031655
GO:0016840	carbon-nitrogen lyase activity	molecular_function	0.69161	1	3	2861	26	24160	gene-KI387_010003,gene-KI387_039938,gene-KI387_017753
GO:0017025	TBP-class protein binding	molecular_function	0.69198	1	2	2861	19	24160	gene-KI387_017956,gene-KI387_010969
GO:0140296	general transcription initiation factor binding	molecular_function	0.69198	1	2	2861	19	24160	gene-KI387_017956,gene-KI387_010969
GO:0009066	aspartate family amino acid metabolic process	biological_process	0.69203	1	6	2861	58	24160	gene-KI387_010648,Novel06147,Novel04517,Novel04058,gene-KI387_040659,gene-KI387_026926
GO:1901681	sulfur compound binding	molecular_function	0.69247	1	6	2861	51	24160	gene-KI387_027031,gene-KI387_014652,gene-KI387_027885,gene-KI387_030748,gene-KI387_030365,Novel05743
GO:0098754	detoxification	biological_process	0.69251	1	3	2861	28	24160	gene-KI387_014558,gene-KI387_037459,gene-KI387_029421
GO:0006801	superoxide metabolic process	biological_process	0.69297	1	1	2861	12	24160	Novel00691
GO:0030259	lipid glycosylation	biological_process	0.6931	1	4	2861	31	24160	Novel03644,Novel03842,gene-KI387_018811,gene-KI387_025667
GO:0008725	DNA-3-methyladenine glycosylase activity	molecular_function	0.69328	1	1	2861	8	24160	gene-KI387_015529
GO:0043733	DNA-3-methylbase glycosylase activity	molecular_function	0.69328	1	1	2861	8	24160	gene-KI387_015529
GO:0015948	methanogenesis	biological_process	0.69347	1	3	2861	31	24160	gene-KI387_002489,gene-KI387_016838,gene-KI387_000492
GO:0015975	energy derivation by oxidation of reduced inorganic compounds	biological_process	0.69347	1	3	2861	31	24160	gene-KI387_000492,gene-KI387_016838,gene-KI387_002489
GO:0043447	alkane biosynthetic process	biological_process	0.69347	1	3	2861	31	24160	gene-KI387_002489,gene-KI387_000492,gene-KI387_016838
GO:0005179	hormone activity	molecular_function	0.69352	1	12	2861	114	24160	gene-KI387_035503,Novel06197,Novel02050,Novel02791,Novel02153,gene-KI387_017882,Novel06327,gene-KI387_013319,gene-KI387_025877,gene-KI387_035588,gene-KI387_031663,gene-KI387_003855
GO:0007599	hemostasis	biological_process	0.69466	1	8	2861	109	24160	Novel03173,gene-KI387_015120,gene-KI387_006020,gene-KI387_003620,gene-KI387_011870,gene-KI387_025953,gene-KI387_013415,gene-KI387_005255
GO:0042060	wound healing	biological_process	0.69466	1	8	2861	109	24160	gene-KI387_005255,gene-KI387_025953,gene-KI387_013415,gene-KI387_003620,gene-KI387_011870,Novel03173,gene-KI387_015120,gene-KI387_006020
GO:0050817	coagulation	biological_process	0.69466	1	8	2861	109	24160	gene-KI387_025953,gene-KI387_013415,gene-KI387_005255,gene-KI387_015120,gene-KI387_006020,Novel03173,gene-KI387_003620,gene-KI387_011870
GO:0050878	regulation of body fluid levels	biological_process	0.69466	1	8	2861	109	24160	gene-KI387_013415,gene-KI387_025953,gene-KI387_005255,Novel03173,gene-KI387_015120,gene-KI387_006020,gene-KI387_011870,gene-KI387_003620
GO:0009878	nodule morphogenesis	biological_process	0.69491	1	1	2861	10	24160	gene-KI387_024903
GO:0044111	development involved in symbiotic interaction	biological_process	0.69491	1	1	2861	10	24160	gene-KI387_024903
GO:0008374	O-acyltransferase activity	molecular_function	0.69498	1	9	2861	78	24160	gene-KI387_015836,gene-KI387_022229,gene-KI387_002517,Novel04243,gene-KI387_025608,gene-KI387_008604,gene-KI387_002529,gene-KI387_008605,gene-KI387_015830
GO:0009059	macromolecule biosynthetic process	biological_process	0.69659	1	403	2861	3356	24160	gene-KI387_031805,gene-KI387_001578,gene-KI387_029873,gene-KI387_014286,gene-KI387_032701,gene-KI387_021666,gene-KI387_034526,gene-KI387_022918,gene-KI387_012598,Novel06548,gene-KI387_026117,gene-KI387_043349,gene-KI387_027031,gene-KI387_020640,Novel04174,Novel07280,gene-KI387_009117,Novel06327,gene-KI387_014278,gene-KI387_010824,gene-KI387_021115,Novel01393,gene-KI387_036854,gene-KI387_024587,ge…
GO:0008192	RNA guanylyltransferase activity	molecular_function	0.69683	1	1	2861	9	24160	gene-KI387_014494
GO:0015849	organic acid transport	biological_process	0.69731	1	12	2861	107	24160	gene-KI387_019034,gene-KI387_027183,gene-KI387_021407,Novel02199,Novel03194,Novel04001,gene-KI387_014251,gene-KI387_026642,gene-KI387_014560,gene-KI387_015775,gene-KI387_005704,gene-KI387_018969
[truncated: 952 more rows]
