# Supplementary material for: Technology Invention and Mechanism Analysis of Rapid Rooting of Taxus × media Rehder Branches Induced by Agrobacterium rhizogenes
Source: Int J Mol Sci. 2023 Dec 27;25(1):375. doi: 10.3390/ijms25010375 (PMC10779043; doi:10.3390/ijms25010375)
Supplement: Supplementary file 1 [file ijms-25-00375-s001.zip › Table S5. The total metabolites detected in the WR and TR.xlsx]

## Sheet: data
Title: Technology Invention and Mechanism Analysis of Rapid Rooting of Taxus media Branches Induced by Agrobacterium rhizogenes
Authors: Ying Wang, Xiumei Luo, Haotian Su, Ge Guan, Shuang Liu, Maozhi Ren
Supplementary Table S5. The total metabolites detected in the WR and TR.
ID	KEGG_ID	EXACT_MASS	NAME_EN	CLASS_EN	ionmode	rt	QC_01	QC_02	QC_03	Mean QC	TR_1	TR_2	TR_3	Mean TR	WR_1	WR_2	WR_3	Mean WR
ID	KEGG_ID	EXACT_MASS	NAME_EN	CLASS_EN	ionmode	rt	QC	QC	QC	Mean QC	TR	TR	TR	Mean TR	WR	WR	WR	Mean WR
1	C06082	264.1362	(+)-Abscisic acid	phytohormone	-	7.86	6682.0765	76.85	3379.46325	3379.46325	76.85	76.85	5304.4205	1819.3735	16461.3895	7725.8855	5647.134	9944.803
2		434.084911	Avicularin	flavonoids	-	6.47	21934.0575	18824.358	20379.20775	20379.20775	34532.303	45188.2135	50966.805	43562.4405	76.85	24008.924	76.85	8054.208
3	C10108	464.0955	Myricitrin	flavonoids	-	5.97	76.85	36311.7755	18194.31275	18194.31275	85733.7565	117441.2225	98520.502	100565.160333333	76.85	76.85	19788.351	6647.35033333333
4		624.169035	Narcissoside	flavonoids	-	6.38	53358.599	76.85	26717.7245	26717.7245	45419.0925	49680.6325	40010.876	45036.867	72893.292	97233.92849	98184.5115	89437.2439966667
5	C01750	448.1006	Quercitrin	flavonoids	-	6.59	226394.46	142728.1705	184561.3153	184561.315266667	364383.5585	480367.072	313506.9455	386085.858666667	171452.784	197502.0465	153718.9215	174224.584
6	C17834	608.1741	Spinosin	flavonoids	-	5.79	7460.21	3214.264	5337.237	5337.237	9372.6535	6045.11	3880.2175	6432.66033333333	8626.1175	10331.1605	15078.854	11345.3773333333
7	C00230	154.02661	Protocatechuic acid	Phenols	-	3.43	7795.0425	1878.9865	4837.0145	4837.0145	21583.812	8328.482499	8271.451999	12727.9154993333	7111.7285	9024.591	3404.242	6513.5205
8		101.047678	1-Aminocyclopropanecarboxylic acid	phytohormone	+	0.7	50289.366	45062.4775	47675.92175	47675.92175	129332.4355	161112.968	97446.236	129297.213166667	27466.663	259082.881	206571.169	164373.571
9	C00334	103.0633	4-Aminobutyric acid	amino acids	+	0.66	134473.7705	123091.0395	128782.405	128782.405	208504.836	186717.6535	171969.786	189064.091833333	52296.38	38022.3365	27208.685	39175.8005
10	C06563	270.0528	Genistein	flavonoids	+	8.93	8231.16	7852.88	8042.02	8042.02	7846.86	12670.634	7901.18	9472.89133333333	15056.5965	17372.871	21824.103	18084.5235
11	C16741	162.1004	5-Hydroxylysine	amino acids	+	0.55	3699.3015	1564.164	2631.73275	2631.73275	7132.8835	1395.45	1605.051	3377.79483333333	2545.893	8860.983	4402.251	5269.709
12	C08493	145.0528	Indole-3-carboxaldehyde	phytohormone	+	6.73	47573.894	35012.3325	41293.11325	41293.11325	41994.2675	75319.1095	5673.5715	40995.6495	21751.275	7610.3125	10032.387	13131.3248333333
13		199.040006	2-Chloro-DL-Phenylalanine	internal standards	+	3.85	107968180.9	87991922.63	97980051.77	97980051.7666667	87553332.07	87523063.7	73296540.65	82790978.8066667	99137879.66	85039190.09	75394752.74	86523940.83
14	C05623	464.0955	Isoquercitrin	flavonoids	+	6.06	1205793.398	958350.9165	1082072.157	1082072.15716667	3574721.284	4322758.408	2703178.676	3533552.78933333	809491.506	797087.027	1707170.069	1104582.86733333
15	C02029	221.1277	DL-Dihydrozeatin	phytohormone	+	3.52	14004.334	9571.4395	11787.88675	11787.88675	14016.839	9269.213	5137.371	9474.47433333333	9643.606	11880.2015	10839.3935	10787.7336666667
16	C10038	300.0634	Diosmetin	flavonoids	+	9.15	3841.782	2169.566	3005.674	3005.674	5468.9315	6723.0915	5692.05	5961.35766666667	3441.673	5078.1855	3524.651	4014.8365
17	C09727	290.079	L-Epicatechin	flavonoids	+	5.08	42633194.62	33889252.06	38261223.34	38261223.34	79922207.65	85088880.65	75197925.89	80069671.3966667	49943346.3	53515982.35	39582398.16	47680575.6033333
18	C00082	181.0739	L-Tyrosine	amino acids	+	1.93	194327.707	111150.627	152739.167	152739.167	872005.5235	1026732.362	464701.42	787813.101833333	52731.7085	30122.6445	39420.1915	40758.1815
19	C14536	284.0685	Glycitein	flavonoids	+	7.91	9001.1775	13432.841	11217.00925	11217.00925	9093.032	27579.609	24133.6465	20268.7625	3644.9635	6694.069	6817.919	5718.98383333333
20		432.105647	Genistin	flavonoids	+	6.62	39064.462	41442.243	40253.3525	40253.3525	59433.589	50692.161	34506.579	48210.7763333333	133481.957	140530.9685	150450.4045	141487.776666667
21	C01460	432.1056	Vitexin	flavonoids	+	5.92	27911.435	4261.875	16086.655	16086.655	15954.18	8985.089	8643.221	11194.1633333333	5448.657	6866.783	3362.2735	5225.9045
22	C01152	169.0851	3-Methy-L-histidine	amino acids	+	0.61	40633.5895	29395.6435	35014.6165	35014.6165	74624.5295	75845.084	82622.3885	77697.334	10688.6675	11022.0795	6005.3995	9238.7155
23	C15545	219.112	cis-Zeatin	phytohormone	+	3.6	2347.261	2382.0735	2364.66725	2364.66725	3098.652	1991.2365	1623.404	2237.76416666667	818.742	2060.532	1519.542	1466.272
24		335.159354	N6-isopentenyladenosine	phytohormone	+	6.1	16343.658	76.85	8210.254	8210.254	76.85	21810.819	2208.2725	8031.9805	76.85	2107.4	76.85	753.7
25	C16431	351.1543	trans-Zeatin-riboside	phytohormone	+	4.31	5387.1375	9404.871	7396.00425	7396.00425	23648.5505	30492.3945	17152.4085	23764.4511666667	6233.6255	7401.2165	2597.499	5410.78033333333
26	C08650	256.0736	isoliquiritigenin	flavonoids	+	9.73	15041.6285	18595.311	16818.46975	16818.46975	4663.5655	6110.3585	4606.476	5126.8	21457.879	35064.666	37209.683	31244.076
27	C09827	256.0736	Pinocembrin	flavonoids	+	11.09	76.85	6439.839003	3258.344502	3258.34450166667	35257.71599	45624.90451	36833.98553	39238.8686766667	3990.271501	76.85	76.85	1381.32383366667
28	C06561	272.0685	Chalconaringenin	flavonoids	+	8.78	2794.684	57661.6265	30228.15525	30228.15525	5654.5625	86417.981	117346.827	69806.4568333333	2154.752	13458.1895	9138.8765	8250.606
29	C00509	272.0685	Naringenin	flavonoids	+	8.86	56761.6085	67363.207	62062.40775	62062.40775	129013.9345	135421.936	145827.687	136754.519166667	66641.72499	69592.0215	65527.09	67253.6121633333
30	C01514	286.0477	Luteolin	flavonoids	+	8.03	15842.6225	14743.718	15293.17025	15293.17025	13555.0525	19325.881	10265.5275	14382.1536666667	39492.0865	34973.032	28991.771	34485.6298333333
31	C12136	306.074	(-)-Epigallocatechin	flavonoids	+	4.12	5710162.998	7976.852001	2859069.925	2859069.92500033	11397866.58	13244574.52	10609465.51	11750635.5366667	9207.125501	18265.5865	12086.28	13186.330667
32	C10509	430.1264	Ononin	flavonoids	+	7.3	2309267.66	1916450.925	2112859.293	2112859.29266667	1422595.096	747129.8085	582891.771	917538.891833333	4318997.1	4049293.291	3241133.753	3869808.048
33	C10107	318.0376	Myricetin	flavonoids	+	7.05	8156.537	5054.424	6605.4805	6605.4805	17517.843	12122.0295	17052.707	15564.1931666667	13885.139	19955.953	7937.1135	13926.0685
34	C02906	320.0532	Dihydromyricetin	flavonoids	+	5.27	242347.281	1119.158	121733.2195	121733.2195	7351.1245	795830.9181	716250.0345	506477.359033333	89236.322	147968.872	87363.88301	108189.692336667
35	C10025	446.0849	Baicalin	flavonoids	+	7.26	16436.129	11073.6535	13754.89125	13754.89125	8830.719	8036.026	13899.6275	10255.4575	13786.198	7350.8805	4901.8475	8679.642
36	C16195	446.1213	Glycitin	flavonoids	+	5.57	16320.834	7866.2975	12093.56575	12093.56575	25805.94	28470.995	16265.8885	23514.2745	12205.9555	11421.7985	25300.625	16309.4596666667
37	C12249	448.1006	Astragalin	flavonoids	+	6.52	269065.4535	69811.481	169438.4673	169438.467266667	612461.2495	758157.9455	597511.3965	656043.5305	199787.1845	259191.098	222775.2085	227251.163666667
38		448.100561	Cynaroside	flavonoids	+	6.1	299795.6835	230120.6645	264958.174	264958.174	853756.4635	1092133.519	780380.022	908756.668166667	170480.329	215900.232	71103.897	152494.819333333
39	C01821	448.1006	Homoorientin	flavonoids	+	5.43	21877.67	25119.365	23498.5175	23498.5175	31424.6155	51673.65	4028.2695	29042.1783333333	28815.7535	6831.123	1577.745	12408.2071666667
40	C07610	482.1213	Silibinin	flavonoids	+	8.65	12364.619	7143.4305	9754.02475	9754.02475	13986.6445	7290.2725	18236.606	13171.1743333333	15499.897	73524.636	19847.4405	36290.6578333333
41	C10018	538.09	Amentoflavone	flavonoids	+	9.78	2664.1315	1848.2835	2256.2075	2256.2075	3979.825999	76.85	5716.307	3257.66099966667	76.85	748.197	76.85	300.632333333333
42	C10181	564.1479	Schaftoside	flavonoids	+	6.35	12035.987	5819.436	8927.7115	8927.7115	29721.4085	46840.7655	24042.1195	33534.7645	18885.9855	7839.883	17957.8515	14894.5733333333
43	C17639	578.1424	Procyanidin B2	flavonoids	+	4.78	153492923.8	121737630.2	137615277	137615277	274432125.4	174402278.5	237006489.6	228613631.166667	171732936	168099457.9	142604792.3	160812395.4
44	C10182	580.1369	Sciadopitysin	flavonoids	+	11.83	36778.527	76.85	18427.6885	18427.6885	76.85	76.85	65795.235	21982.9783333333	76.85	76.85	76.85	76.85
45	C17140	594.1373	Tiliroside	flavonoids	+	7.92	2423.725	1058.6995	1741.21225	1741.21225	269.2725	264.9255	76.85	203.682666666667	1365.192	1073.167	2796.632	1744.997
46	C21833	594.1585	Kaempferol-3-O-rutinoside	flavonoids	+	6.29	581705.6185	565266.382	573486.0003	573486.000266667	1339443.304	1502190.988	1213838.061	1351824.11766667	761317.565	884835.803	762041.6505	802731.672833333
47	C10039	608.1741	Diosmin	flavonoids	+	6.59	36441.464	39832.042	38136.753	38136.753	6258.564	967.3825	2422.4835	3216.14333333333	171856.9005	123401.6705	76.85	98445.1403333333
48	C05625	610.1534	Rutin	flavonoids	+	5.85	1651224.562	1269021.933	1460123.248	1460123.24766667	5219927.246	6346818.6	4322869.614	5296538.48666667	1698556.278	2072136.426	1432713.383	1734468.69566667
49	C10524	416.1107	Puerarin	flavonoids	+	4.89	253567.599	279209.0945	266388.3468	266388.346766667	367674.552	344330.596	273265.2285	328423.458833333	252103.017	174690.454	223671.514	216821.661666667
50	C00183	117.078979	L-Valine	Amino acid and derivatives	+	0.93	232708.964	181445.755	207077.3595	207077.3595	360589.2665	389131.4425	302099.135	350606.614666667	179841.571	186440.6445	127686.984	164656.399833333
51	C00188	119.058244	L-Threonine	Amino acid and derivatives	+	0.64	163360.612	106654.9495	135007.7808	135007.780766667	240856.8915	264214.58	166919.0255	223996.832333333	75782.085	56744.964	46760.91	59762.653
52	C00148	115.063329	Proline	Amino acid and derivatives	+	0.73	63476228.91	48275389.71	55875809.31	55875809.31	109536533.5	104045932.4	87000495.23	100194320.376667	28186045.29	23248207.3	20528738.81	23987663.8
53	C00065	105.042594	L-Serine	Amino acid and derivatives	+	0.62	217310.733	131353.7745	174332.2538	174332.253766667	294814.409	312550.027	240994.992	282786.476	150283.6985	169594.6985	133818.5165	151232.3045
54	C00062	174.111676	L-Arginine	Amino acid and derivatives	+	0.6	972975.063	1098446.108	1035710.586	1035710.58566667	2078093.333	1829990.381	1546339.275	1818140.99633333	1743226.135	2249340.131	1639957.997	1877508.08766667
55	C00152	132.053493	L-Asparagine	Amino acid and derivatives	+	0.64	139190.068	56312.776	97751.422	97751.422	156506.822	155751.383	83244.299	131834.168	41844.4505	17122.2095	7347.3025	22104.6541666667
56	C01602	132.089878	L-Ornithine	Amino acid and derivatives	+	0.55	40498.18	167.391	20332.7855	20332.7855	80896.956	1014.111	67846.844	49919.3036666667	19176.7375	15812.1085	13807.6695	16265.5051666667
57	C00049	133.037509	L-Aspartic acid	Amino acid and derivatives	+	0.63	268831.7845	129690.047	199260.9158	199260.915766667	382646.0605	319502.6825	317084.859	339744.534	131013.0875	88444.51	73326.2435	97594.6136666667
58	C00327	175.095692	L-Citruline	Amino acid and derivatives	+	0.66	39368.489	137405.427	88386.958	88386.958	316230.792	305062.691	281671.9655	300988.482833333	74200.8375	79362.934	125190.7415	92918.171
59	C00025	147.053159	L-Glutamic acid	Amino acid and derivatives	+	0.66	7280082.822	5621061.137	6450571.98	6450571.97966667	10865152.93	10982579.97	8380010.139	10075914.3463333	5239818.209	3646006.363	3301713.059	4062512.54366667
60	C00135	155.069477	L-Histidine	Amino acid and derivatives	+	0.59	156139.754	152231.5175	154185.6358	154185.635766667	312125.041	261194.8985	245247.857	272855.932166667	71322.008	96490.6235	64695.395	77502.6755
61	C01157	131.058244	trans-4-Hydroxy-L-proline	Amino acid and derivatives	+	0.65	50174.1425	22493.7065	36333.9245	36333.9245	91021.979	88545.4475	70475.396	83347.6075	25854.01	29241.449	10316.6095	21804.0228333333
62	C00041	89.047679	L-Alanine	Amino acid and derivatives	+	0.64	339563.2175	153956.965	246760.0913	246760.091266667	384754.6005	346359.5095	207971.6135	313028.5745	125639.787	42105.822	23257.433	63667.6806666667
63	C00047	146.105528	L-Lysine	Amino acid and derivatives	+	0.64	2870061.867	2348377.526	2609219.697	2609219.69666667	5354708.611	5593648.84	4240017.035	5062791.49533333	1961066.775	2131062.236	1706495.994	1932875.00166667
64	C00078	204.089878	L-Tryptophan	Amino acid and derivatives	+	3.77	17030.2515	6610.326999	11820.28925	11820.2892496667	31883.7515	1347.588	21322.2835	18184.541	2253.9725	4468.4285	1720.929	2814.44333333333
65	C00149	134.021525	Malic acid	Hydroxy acids and derivatives	-	0.8	142221.627	2368.4095	72295.01825	72295.01825	494677.6105	3226.754	11010.4	169638.254833333	17064.711	24644.8985	626.04	14111.8831666667
66	C00497	134.021525	L(-)-Malic acid	Fatty Acyls	-	0.77	142221.627	2368.4095	72295.01825	72295.01825	494677.6105	3226.754	11010.4	169638.254833333	17064.711	24644.8985	626.04	14111.8831666667
67	C01604	436.13695	Phlorizin	Chalcones	-	6.41	19073.336	18531.114	18802.225	18802.225	42220.955	40820.287	45588.05	42876.4306666667	18551.315	30457.2635	33481.605	27496.7278333333
68	C00122	116.01096	Fumaric acid	Organic acids and derivatives	-	0.53	1345.665	76.85	711.2575	711.2575	3987.304	152.9645	77.075	1405.78116666667	383.4905	1395.784	76.85	618.708166666667
69	C19837	161.047679	1H-Indole-3-carboxylic acid	Alkaloids	-	0.53	2182.918	80.925	1131.9215	1131.9215	2851.3995	76.85	76.85	1001.69983333333	843.228	1336.3965	76.85	752.158166666667
70	C09529	292.09469	Picrotoxinin	Sesquiterpenoids	-	5.07	260980.495	193811.704	227396.0995	227396.0995	287314.823	379858.596	308464.045	325212.488	199112.3455	277746.5425	238527.6135	238462.167166667
71		516.308705	Oleaside A	Steroids and steroid derivatives	-	0.74	156405.0865	78148.734	117276.9103	117276.910266667	163816.393	171597.365	138450.432	157954.73	147549.0685	198860.0565	141924.388	162777.837666667
72	C00492	504.16904	Raffinose	Organooxygen compounds	-	1.31	35943.653	25694.936	30819.2945	30819.2945	41591.5905	70832.848	18082.5675	43502.3353333333	37249.342	29593.554	76.85	22306.582
73	C00794	182.07904	D-Sorbitol	Alcohols and polyols	-	0.72	26834.364	76.85	13455.607	13455.607	21722.847	15101.461	6986.18	14603.496	75104.844	67753.979	21842.978	54900.6003333333
74	C10682	358.14164	Matairesinol	Lignans	-	9.12	96243.3395	82013.632	89128.48575	89128.48575	76.85	12351.428	14269.12	8899.13266666667	218268.0675	220377.265	209926.1375	216190.49
75	C10541	314.042655	Wedelolactone	Coumarins	-	10.22	1985.192	1332.3365	1658.76425	1658.76425	76.85	76.85	76.85	76.85	897.0344994	76.85	2240.0995	1071.3279998
76	C00137	180.06339	myo-Inositol	Organooxygen compounds	-	0.72	24099.297	76.85	12088.0735	12088.0735	28252.818	8553.914	76.85	12294.5273333333	27514.431	17268.057	76.85	14953.1126666667
77	C00092	260.029722	D-Glucose 6-phosphate	Carbohydrates	-	0.65	287381.401	153305.4615	220343.4313	220343.431266667	532742.5345	552091.2435	393727.5585	492853.778833333	163900.217	205089.3145	134104.751	167698.094166667
78	C00446	260.029722	Galactose 1-phosphate	Organooxygen compounds	-	0.65	297453.0765	191372.449	244412.7628	244412.762766667	637237.3175	772847.754	443583.4315	617889.501	139770.9	171858.8285	82205.3445	131278.357666667
79	C00064	146.069143	L-Glutamine	Amino acid and derivatives	-	0.64	96949.5125	76.85	48513.18125	48513.18125	188305.586	16510.843	13640.5465	72818.9918333333	54932.383	62044.63	3172.6255	40049.8795
80	C03990	376.297745	Lithocholic acid	Steroids	-	3.14	5330.1515	486.514	2908.33275	2908.33275	640.124	13847.3935	4022.437	6169.98483333333	802.792	1869.2035	787.3085	1153.10133333333
81	C05402	342.116215	Melibiose	Carbohydrates	-	4.55	7936.424	1797.069	4866.7465	4866.7465	7187.796501	7833.503501	5192.2555	6737.851834	2826.3695	17656.54	1665.16	7382.68983333333
82	C00208	342.116215	D-Maltose	Carbohydrates	-	0.76	7882967.726	5234774.532	6558871.129	6558871.129	8063689.498	8505375.943	5934759.793	7501275.078	10829892.41	12158571.68	6674399.973	9887621.35433333
83	C00121	150.052825	D-Ribose	Carbohydrates	-	0.77	11888.211	76.85	5982.5305	5982.5305	27235.324	2443.008	76.85	9918.394	7710.382	6057.197	76.85	4614.80966666667
84	C00216	150.052825	D-Arabinose	Miscellaneous	-	0.75	8164.264	76.85	4120.557	4120.557	27235.324	2443.008	76.85	9918.394	7710.382	6057.197	76.85	4614.80966666667
85	C00156	138.031695	4-Hydroxybenzoic acid	Phenols	-	1.08	38999.38	1863.0505	20431.21525	20431.21525	60404.9365	5075.9055	76.85	21852.564	40150.1475	32532.732	2815.142	25166.0071666667
86	C00628	154.02661	Gentisic acid	Phenols	-	3.62	9880.997	686.575	5283.786	5283.786	8980.7395	76.85	76.85	3044.81316666667	19923.9925	15349.372	3057.615	12776.9931666667
87	C00493	174.052825	Shikimic acid	Organic acids and derivatives	-	1.1	290442.8305	84620.0645	187531.4475	187531.4475	498625.852	328866.7215	202390.0855	343294.219666667	249358.069	267928.321	99710.611	205665.667
88	C00330	267.096755	Deoxyguanosine	Nucleotide and its derivates	-	2.72	5586.36	5646.4475	5616.40375	5616.40375	9391.761	12745.1155	4934.86	9023.91216666667	4725.72	76.85	76.85	1626.47333333333
89	C03406	290.122636	Argininosuccinate	Organic acids	-	4.49	64303.6545	58292.388	61298.02125	61298.02125	115914.401	150881.4485	97906.645	121567.498166667	61312.1995	82595.595	62560.638	68822.8108333333
90		290.15181	1-Dehydro-6-gingerdione	Phenols	-	4.97	408.5025	62062.801	31235.65175	31235.65175	113453.8135	139098.0015	125138.076	125896.630333333	77857.8765	89631.49751	108974.008	92154.46067
91	C10192	302.042655	Tricetin	Flavonoids	-	8.05	27700.613	398.891	14049.752	14049.752	31720.0725	32869.5865	40335.03	34974.8963333333	14937.693	20691.0035	20795.053	18807.9165
92	C01617	304.058305	Taxifolin	Flavonoids	-	6.34	14436.4895	16804.828	15620.65875	15620.65875	16578.0245	23785.647	25309.413	21891.0281666667	17337.4255	22200.717	15132.975	18223.7058333333
93	C00257	196.058305	Gluconic acid	Carbohydrates	-	0.69	149828.7805	36579.567	93204.17375	93204.17375	488313.8185	377245.589	216862.68	360807.3625	19980.5505	35485.141	12607.4905	22691.0606666667
94	C00105	324.03587	Uridine 5'-monophosphate	Nucleotide and its derivates	-	1.39	10535.6055	4875.0285	7705.317	7705.317	24834.893	30091.341	12769.096	22565.11	3529.396	76.85	76.85	1227.69866666667
95	C03519	207.089544	N-Acetyl-L-phenylalanine	Amino acid and derivatives	-	5.88	12767.3435	16735.42	14751.38175	14751.38175	27191.64	33588.4065	31698.58	30826.2088333333	10311.5615	76.85	76.85	3488.4205
96	C00029	566.055027	Uridine 5'-diphospho-D-glucose	Nucleotide and its derivates	-	0.71	132880.5725	35234.246	84057.40925	84057.40925	203814.288	401148.148	105935.752	236966.062666667	25745.119	69838.0225	21225.6	38936.2471666667
97	C00191	194.042655	D-glucoronic acid	Carbohydrates	-	0.71	65095.6995	17037.996	41066.84775	41066.84775	140576.5125	68774.4035	51082.4325	86811.1161666667	38772.3395	52285.8405	24055.249	38371.143
98	C01004	137.047679	Trigonelline	Alkaloids	+	0.82	7405.909	1862.4785	4634.19375	4634.19375	2274.54	4095.715	76.85	2149.035	7230.486	76.85	76.85	2461.39533333333
99	C00576	101.084064	Betaine aldehyde	Organonitrogen compounds	+	0.75	20528.25	17435.602	18981.926	18981.926	12809.8425	10322.4035	8385.3045	10505.8501666667	24566.896	13932.077	6756.095	15085.0226666667
100	C03917	290.22458	Dihydrotestosterone	Steroids and steroid derivatives	+	5.08	45920.7975	45737.431	45829.11425	45829.11425	96323.348	146892.874	66922.5965	103379.606166667	71077.7705	88893.6475	7252.0735	55741.1638333333
101	C07635	290.22458	Epiandrosterone	Steroids and steroid derivatives	+	5.17	45920.7975	56510.6505	51215.724	51215.724	96323.348	98602.289	66922.5965	87282.7445	71077.7705	88893.6475	24375.2925	61448.9035
102	C00523	290.22458	Androsterone	Steroids and steroid derivatives	+	5.06	149284.6835	136687.52	142986.1018	142986.101766667	250012.626	223458.675	216921.8905	230131.063833333	156343.0185	121536.3275	122553.482	133477.609333333
103	C04373	290.22458	Etiocholanolone	Steroids and steroid derivatives	+	5.07	149284.6835	136687.52	142986.1018	142986.101766667	250012.626	223458.675	216921.8905	230131.063833333	156343.0185	121536.3275	122553.482	133477.609333333
104	C01965	290.137891	Trimethoprim	Phenol ethers	+	5.08	97569729.74	91298308.11	94434018.93	94434018.9266667	182888051	216877399.8	194763447.3	198176299.366667	118093729.4	123533269.4	102242430.8	114623143.2
105	C09566	290.15181	Epitulipinolide	Sesquiterpenoids	+	5.07	143950.778	111344.873	127647.8255	127647.8255	249888.67	255334.18	281222.092	262148.314	202595.8615	167332.1595	13890.676	127939.565666667
106	C09282	286.084125	Oxypeucedanin	Coumarins	+	8.12	7841.4115	1871.2875	4856.3495	4856.3495	2868.51	1976.3215	1827.1305	2223.98733333333	6016.1545	4050.7445	8753.052501	6273.317167
107		286.09938	2-O-Methylanigorufone	Phenols	+	7.57	4227.734	5306.8615	4767.29775	4767.29775	3267.3505	8263.0565	9357.696001	6962.70100033333	2148.834	4547.2005	27917.4745	11537.8363333333
108	C05903	286.04774	Kaempferol	Flavonoids	+	9.39	5194.0815	8989.779501	7091.930501	7091.93050066667	5459.3645	8810.564499	985.2355	5085.054833	22002.2155	5765.976501	10421.0225	12729.738167
109	C05334	286.084125	Isosakuranetin	Flavonoids	+	6.53	19084.7975	24634.557	21859.67725	21859.67725	52795.678	47443.467	31835.675	44024.94	22240.1015	1473.66	9325.1485	11012.97
110	C05905	286.04774	Cyanidin	Flavonoids	+	5.9	11007.5405	24410.694	17709.11725	17709.11725	27440.3725	83828.3625	14517.516	41928.7503333333	26200.336	34148.3715	21200.639	27183.1155
111	C10041	286.04774	Fisetin	Flavonoids	+	7.06	19529.295	23377.7815	21453.53825	21453.53825	46450.3555	67504.3345	28657.371	47537.3536666667	33831.7535	15318.426	27961.281	25703.8201666667
112	C09920	286.084125	Brazilin	Flavonoids	+	6.2	36977.755	21102.58	29040.1675	29040.1675	50032.432	95817.0815	51777.072	65875.5285	19655.607	25445.862	11778.7295	18960.0661666667
113	C10510	286.04774	Orobol (5,7,3',4'-tetrahydroxyisoflavone)	Flavonoids	+	7.9	9816.827	8789.745	9303.286	9303.286	10820.2465	13298.355	14837.2115	12985.271	20316.8405	20933.5155	14839.9425	18696.7661666667
114	C10184	286.04774	Scutellarein	Flavonoids	+	8.12	11803.673	4206.8645	8005.26875	8005.26875	16161.419	10120.279	14815.1145	13698.9375	17397.188	30540.3305	22476.8055	23471.4413333333
115	C17786	286.04774	Demethoxycapillarisin	Flavonoids	+	6.51	8383.236	4318.817	6351.0265	6351.0265	17390.55	34190.106	3465.946	18348.8673333333	14307.379	12571.748	12416.8055	13098.6441666667
116	C12134	286.04774	2'-Hydroxygenistein	Flavonoids	+	7.59	6275.748	7709.095	6992.4215	6992.4215	7298.669	8578.763	8086.641501	7988.02450033333	13763.536	21218.629	9288.7025	14756.9558333333
117	C10526	286.12051	(-)-Sativan	Flavonoids	+	7.89	75774.5835	46585.863	61180.22325	61180.22325	64810.4005	70718.1045	57975.9185	64501.4745	150900.502	210258.7305	121994.6355	161051.289333333
118	C09833	286.084125	Sakuranetin	Flavonoids	+	9.94	2961.384998	5410.4395	4185.912249	4185.912249	7906.3615	5777.085	5089.1205	6257.52233333333	9490.769499	41839.6595	8302.17	19877.5329996667
119	C00380	111.043262	Cytosine	Nucleotide and its derivates	+	0.63	83056.8975	78902.7435	80979.8205	80979.8205	37244.3395	68271.878	47147.828	50888.0151666667	112406.7415	64022.973	82406.293	86278.6691666667
120	C00463	117.057849	Indole	Alkaloids	+	3.82	2718810.34	4274.436	1361542.388	1361542.388	7654.7625	3819919.408	2996561.642	2274711.9375	1533842.312	2531.2425	3901.7415	513425.098666667
121	C01826	117.078979	DL-Norvaline	Amino acid and derivatives	+	1.05	251277.7405	191879.448	221578.5943	221578.594266667	487421.236	525945.502	343487.1225	452284.620166667	340695.7355	227881.153	141725.7565	236767.548333333
122	C00431	117.078979	5-Aminovaleric acid	Amino acid and derivatives	+	1.11	489812.1495	423555.1645	456683.657	456683.657	1373603.264	1319733.134	1015690.201	1236342.19966667	384011.7075	411294.349	383034.889	392780.315166667
123	C00872	119.021859	Aminomalonic acid	Organic acids	+	0.65	21595.1725	18380.433	19987.80275	19987.80275	44142.731	47204.0615	23367.6525	38238.1483333333	7316.314	10704.1355	10209.931	9410.12683333333
124	C00763	115.063329	D-Proline	Carboxylic acids and derivatives	+	0.76	63476228.91	48275389.71	55875809.31	55875809.31	109536533.5	104045932.4	87000495.23	100194320.376667	28186045.29	23248207.3	20528738.81	23987663.8
125	C11918	126.031695	Maltol	Flavonoids	+	0.9	1021372.35	728208.5445	874790.4473	874790.447266667	1055290.299	965070.37	908435.8865	976265.5185	1042707.381	834619.8845	858006.466	911777.9105
126	C04592	126.06808	Toluene-cis-dihydrodiol	polyol	+	1.78	10476.581	6791.6045	8634.09275	8634.09275	30658.9515	37432.84	21236.314	29776.0351666667	8291.3835	5945.637	3976.2495	6071.09
127	C11101	126.031695	5-Hydroxymethylfurfural	Carbonyl compounds	+	2.95	15352.227	13396.4295	14374.32825	14374.32825	37284.353	13311.6225	17956.4465	22850.8073333333	13527.507	8253.178	9697.638001	10492.7743336667
128	C05123	125.998681	2-Hydroxyethanesulfonate	Organic acids	+	0.76	100688.3005	49936.4855	75312.393	75312.393	173148.225	105093.069	120625.791	132955.695	89660.237	117324.7025	78980.112	95321.6838333333
129	C02261	103.063329	D-alpha-Aminobutyric acid	Carboxylic acids and derivatives	+	0.65	19773413.44	11395909.2	15584661.32	15584661.32	29564490.87	31641613.1	20515862.68	27240655.55	16041244.9	15376931.59	12220604.22	14546260.2366667
130	C01026	103.063329	N,N-Dimethylglycine	Amino acid and derivatives	+	1.04	827731.184	563718.2735	695724.7288	695724.728766667	1783301.575	2715192.949	2104505.336	2200999.95333333	1076786.884	1169706.757	947479.836	1064657.82566667
131	C03665	103.063329	2-Aminoisobutyric acid	Amino acid and derivatives	+	0.98	827731.184	563718.2735	695724.7288	695724.728766667	1783301.575	2715192.949	2104505.336	2200999.95333333	1076786.884	1169706.757	947479.836	1064657.82566667
132	C11735	103.063329	N-Ethylglycine	Carboxylic acids and derivatives	+	1.16	827731.184	563718.2735	695724.7288	695724.728766667	1783301.575	2715192.949	2104505.336	2200999.95333333	54175.4755	161393.8405	947479.836	387683.050666667
133	C05145	103.063329	3-Aminoisobutanoic acid	Amino acid and derivatives	+	0.94	66313.256	49360.0135	57836.63475	57836.63475	3178.512	115669.5445	104931.62	74593.2255	76.85	47498.407	1049.647	16208.3013333333
134		103.063329	O-Acetylethanolamine	Alkaloids	+	0.67	6763910.908	4338272.56	5551091.734	5551091.734	10519876.15	9883289.751	8375415.464	9592860.455	5831883.326	6268321.138	4569451.046	5556551.83666667
135	C10897	191.069477	Carbendazim	Benzimidazoles	+	4.1	7465.9885	211.172	3838.58025	3838.58025	432.25	854.4925	407.6735	564.805333333333	10243.718	10088.2965	5092.9025	8474.97233333333
136	C00785	138.042928	Urocanic acid	Azoles	+	4.21	218833.9895	169258.66	194046.3248	194046.324766667	407980.829	502963.6605	358945.775	423296.754833333	218363.324	188260.849	126456.097	177693.423333333
137	C00587	138.031695	3-Hydroxybenzoic acid	Phenols	+	8.39	9285.642	352.83	4819.236	4819.236	6177.7545	1573.656	788.88	2846.7635	1190.844	1448.826	1922.496	1520.722
138	C05585	138.031695	2,5-Dihydroxybenzaldehyde	Phenols	+	5.09	7255755.704	6288307.872	6772031.788	6772031.788	11832319.39	13285851.5	9912797.751	11676989.547	8238039.871	7396326.51	6375653.489	7336673.29
139	C16700	138.031695	3,4-Dihydroxybenzaldehyde	Phenols	+	4.29	915554.03	578464.5795	747009.3048	747009.304766667	1469854.062	1536110.179	1358579.693	1454847.978	722455.701	680360.9685	455089.274	619301.981166667
140	C07084	138.06808	Styrene-cis-2,3-dihydrodiol	polyol	+	5.12	1444238.292	1281758.542	1362998.417	1362998.417	2979869.894	3055118.735	2597152.071	2877380.23333333	1582250.672	1798442.95	1629754.193	1670149.27166667
141		138.104465	2-Pentylfuran	Miscellaneous	+	1.11	259054.978	124467.4585	191761.2183	191761.218266667	286724.522	336734.715	163768.3645	262409.2005	194614.1975	128590.0575	41650.7465	121618.333833333
142	C00740	105.042594	D-Serine	Alkaloids	+	0.66	217310.733	131353.7745	174332.2538	174332.253766667	294814.409	312550.027	240994.992	282786.476	150283.6985	169594.6985	133818.5165	151232.3045
143	C07195	267.096755	Vidarabine	Purine nucleosides	+	2.28	2669232.298	2222751.111	2445991.705	2445991.70466667	4489.3035	9417386.875	5589499.123	5003791.76716667	1241.5445	2389387.912	2224294.882	1538308.11283333
144	C00212	267.096755	Adenosine	Nucleotide and its derivates	+	2.58	2669232.298	2222751.111	2445991.705	2445991.70466667	8602933.116	9417386.875	139733.014	6053351.00166667	2192203.468	2389387.912	2224294.882	2268628.754
145	C17425	244.109945	Linderalactone	Sesquiterpenoids	+	8.74	7551.206	33324.0925	20437.64925	20437.64925	6822.559	5599.625	2834.7335	5085.63916666667	15598.844	14805.622	17887.559	16097.3416666667
146	C00299	244.069538	Uridine	Nucleotide and its derivates	+	2.47	76.85	6216.184499	3146.51725	3146.51724966667	19360.262	17259.7355	12389.886	16336.6278333333	7310.218	2626.899	2691.627	4209.58133333333
147	C17447	244.182715	Panaxynol	Miscellaneous	+	12.57	13036.48699	7243.407494	10139.94724	10139.9472413333	5967.868503	13454.452	6226.896001	8549.73883466667	4417.545003	76.85	6733.408998	3742.60133366667
148	C10273	244.07356	Oxyresveratrol	Phenols	+	8.74	17322.2735	12749.41	15035.84175	15035.84175	11505.9515	11251.231	16888.0445	13215.0756666667	40198.496	52231.538	52860.453	48430.1623333333
149	C02067	244.069538	Pseudouridine	Nucleotide and its derivates	+	8.73	2327.418	7894.554	5110.986	5110.986	4417.885499	5262	3401	4360.29516633333	29386.49	25472.06	13789.227	22882.5923333333
150	C10781	244.157563	Rhombifoline	Alkaloids	+	8.74	7348.1205	8916.0245	8132.0725	8132.0725	7928.3665	4303.8265	7236.080999	6489.42466633333	3173.962	13359.3065	10496.585	9009.95116666667
151	C01772	164.047345	2-Hydroxycinnamic acid	Phenylpropanoids	+	5.44	55833.982	19074.305	37454.1435	37454.1435	61008.756	42151.294	31616.7555	44925.6018333333	65864.953	40873.6265	50096.132	52278.2371666667
152	C02763	164.047345	Enol-phenylpyruvate	Benzene and substituted derivatives	+	5.08	6673601.744	6532617.033	6603109.389	6603109.38866667	12147984.64	13014282.76	10771681.99	11977983.13	7009519.232	8083479.041	6586458.638	7226485.637
153	C10438	148.05243	Cinnamic acid	Cinnamic acids and derivatives	+	8.62	18310.712	8661.932	13486.322	13486.322	9192.9165	6070.2065	7694.675501	7652.59950033333	5651.765499	9628.431001	5208.11	6829.4355
154	C06577	148.088815	4-Isopropylbenzaldehyde	Phenols	+	10.56	7529.212001	14367.38999	10948.301	10948.300997	4012.166	5429.9445	10391.82699	6611.31249666667	12994.44049	9891.606003	20380.0705	14422.0389976667
156	C02274	148.05243	3,4-Dihydrocoumarin	Coumarins	+	6.68	11629.885	9847.2815	10738.58325	10738.58325	21473.3855	22706.7595	5195.534	16458.5596666667	10627.768	11483.456	19052.776	13721.3333333333
157	C18082	216.04226	Isobergapten	Coumarins	+	9.94	4875.285999	6845.2245	5860.25525	5860.25524966667	1121.133	2558.3055	3125.226	2268.2215	6247.356	16278.989	4770.274001	9098.87300033333
158	C00242	151.04941	Guanine	Nucleotide and its derivates	+	2.63	113759.9645	87200.50201	100480.2333	100480.23327	313361.735	357243.6885	153458.643	274688.022166667	75161.0425	100604.6745	48873.034	74879.5836666667
159	C01879	129.042594	5-oxoproline	Amino acid and derivatives	+	0.56	209196.137	110143.866	159670.0015	159670.0015	368251.2105	415956.924	306551.693	363586.609166667	69750.0465	97639.2305	23119.325	63502.8673333333
160	C03005	151.063329	2-(Methylamino)benzoic acid	Benzene and substituted derivatives	+	1.58	7964.113	5858.8485	6911.48075	6911.48075	13389.841	18974.433	16189.8965	16184.7235	8176.6485	11195.4025	10599.988	9990.67966666667
161	C17756	151.063329	Leukoaminochrome	Indoles and derivatives	+	2.42	3492.647	14118.862	8805.7545	8805.7545	43683.0325	39770.3925	1824.3585	28425.9278333333	2999.372	15428.5815	10977.008	9801.65383333333
162	C00009	97.976897	Phosphoric acid	Organic acids	+	0.65	1886237.444	1023982.817	1455110.131	1455110.13066667	2688136.5	2660851.295	1898761.585	2415916.46	581217.7885	482886.794	247851.203	437318.595166667
163	C00318	161.105194	L-Carnitine	Organonitrogen compounds	+	0.69	40013.1545	25604.3825	32808.7685	32808.7685	98021.836	108861.3115	78530.3705	95137.8393333333	41729.389	52434.06	38143.9645	44102.4711666667
164	C02656	160.07356	Pimelic acid	Fatty Acyls	+	0.55	768392.785	529109.5165	648751.1508	648751.150766667	1353624.729	1385758.653	1183830.51	1307737.964	342934.161	412527.243	300118.975	351860.126333333
165	C00490	130.02661	Itaconic acid	Fatty Acyls	+	0.52	64078.9685	50681.748	57380.35825	57380.35825	99604.394	96447.8025	67177.075	87743.0905	46822.3305	34949.288	32475.7755	38082.4646666667
166	C17144	130.135765	3-Octyl alcohol	Miscellaneous	+	1.23	5546.115	9128.4705	7337.29275	7337.29275	7360.294501	3799.63	5686.587	5615.50383366667	8741.6065	11130.351	14115.5035	11329.1536666667
167	C02505	135.068414	2-Phenylacetamide	Benzene and substituted derivatives	+	2.52	344570.654	284499.8945	314535.2743	314535.274266667	860618.4241	1017616.05	742691.5815	873642.018533333	255824.2255	329506.3945	260441.9645	281924.194833333
168	C00147	135.054495	Adenine	Nucleotide and its derivates	+	2.6	344570.654	284499.8945	314535.2743	314535.274266667	860618.4241	1017616.05	742691.5815	873642.018533333	255824.2255	329506.3945	268941.7	284757.44
169	C06075	136.1252	Terpinolene	Monoterpenoids	+	10.57	20273.389	36917.71898	28595.55399	28595.55399	18109.999	14164.37149	6342.710005	12872.360165	17773.27699	11114.60801	12149.9455	13679.2768333333
170	C07565	135.068414	N-Acetylarylamine	Benzene and substituted derivatives	+	1.93	95362.154	68179.135	81770.6445	81770.6445	232746.1745	260978.5705	207722.826	233815.857	32722.5045	52720.5455	51906.0755	45783.0418333333
171		156.11503	Delta-Nonalactone	Miscellaneous	+	0.53	31401.8925	21246.2735	26324.083	26324.083	42937.327	50105.754	33044.896	42029.3256666667	21862.629	25313.5745	20016.773	22397.6588333333
172	C01250	173.068809	N-Acetyl-L-glutamate 5-semialdehyde	Carboxylic acids and derivatives	+	1.51	5483.191	3419.117	4451.154	4451.154	7813.6355	10710.7445	5734.5205	8086.30016666667	1598.2975	1947.649	1599.9975	1715.31466666667
173	C17366	173.068809	(2S,5S)-trans-Carboxymethylproline		+	1.38	19945.4185	3148.591	11547.00475	11547.00475	53505.6185	52828.8855	42727.2655	49687.2565	6133.139	4709.136	2415.5055	4419.26016666667
174	C00758	202.02661	Bergaptol	Coumarins	+	7.44	1971.684	2918.1475	2444.91575	2444.91575	3725.5075	2021.0905	959.3155	2235.3045	4543.441	3951.233	2836.115	3776.92966666667
175	C02236	201.993596	4-Sulfobenzoate		+	4.68	13330.919	15458.0935	14394.50625	14394.50625	24730.756	37928.3275	18769.8715	27142.985	14785.339	5447.74	10152.1215	10128.4001666667
176		202.09938	Demethoxyencecalin	Phenols	+	11.8	17532.3825	16978.0015	17255.192	17255.192	14729.63401	13105.54049	13254.679	13696.6178333333	7189.256001	14830.9095	3889.999998	8636.721833
177	C09684	204.1878	Alpha-caryophyllene	Sesquiterpenoids	+	11.58	19237.093	22516.01299	20876.553	20876.5529966667	8653.687999	12378.15099	13851.86301	11627.9006663333	12804.527	30931.89249	8638.32	17458.2464966667
178	C07070	204.072119	Levamisole	Imidazothiazoles	+	12.04	12653.625	25590.9965	19122.31075	19122.31075	9573.705496	4379.831495	11730.6715	8561.40283033333	3965.763002	4135.369998	11151.70701	6417.61333666667
179	C01419	178.041214	CYS-GLY	Amino acid and derivatives	+	1.38	2185.444	495.387	1340.4155	1340.4155	530.419	2780.4045	2924.827	2078.55016666667	76.85	869.0765001	156.0345	367.320333366667
180	C02666	178.062995	Coniferylaldehyde	Phenylpropanoids	+	6.78	88999.44749	44706.7785	66853.113	66853.1129966667	174467.88	191401.651	70143.0335	145337.5215	89928.4335	38669.669	46666.0395	58421.3806666667
181	C00588	183.066046	Phosphorylcholine	Cholines	+	0.67	986202.4845	690015.1155	838108.8	838108.8	1787890.279	1995690.595	1662067.078	1815215.984	132831.901	118451.492	84199.345	111827.579333333
182	C05548	187.084459	2-Keto-6-acetamidocaproate	Keto acids and derivatives	+	1.48	7382.732	12217.043	9799.8875	9799.8875	30004.366	34009.112	25211.317	29741.5983333333	5420.7925	4023.341	1060.587	3501.5735
183	C01717	189.042594	Kynurenic acid	Alkaloids	+	4.36	11722.8315	9007.556	10365.19375	10365.19375	20242.8805	20015.0695	14250.613	18169.521	7653.875501	5511.919	6167.819	6444.53783366667
184	C16778	196.07356	Cantharidin	Monoterpenoids	+	6.03	4251.5125	3583.773	3917.64275	3917.64275	6540.5915	7601.793	5709.5345	6617.30633333333	4061.2835	4037.0445	6192.5975	4763.64183333333
185	C09861	196.14633	Geranylacetate	Monoterpenoids	+	9.58	3577.7265	6805.666999	5191.69675	5191.69674966667	5060.678	1580.4855	5470.9055	4037.35633333333	5304.7575	5657.1575	5701.586	5554.50033333333
186	C08491	210.125595	Jasmonic acid	Fatty Acyls	+	6.73	16655.108	17046.694	16850.901	16850.901	70897.779	64042.362	46188.591	60376.244	6279.188999	6966.934	7154.34	6800.154333
187	C09696	210.104465	Lactaroviolin	Prenol lipids	+	10.51	10950.11649	9852.305499	10401.21099	10401.210993	3293.341501	2174.449	5298.595996	3588.795499	24329.13652	4244.481501	5225.729995	11266.4493386667
188	C06536	214.110613	Harmaline	Alkaloids	+	10	1909.699999	841.4000006	1375.55	1375.54999986667	3043.5675	1323.1185	619.3499999	1662.01199996667	2005.692001	1879.118499	926.742	1603.85083333333
189	C15608	222.06808	Flavone	Flavonoids	+	4.13	7936.6845	871.221	4403.95275	4403.95275	4880.198	13495.289	9909.6715	9428.38616666667	3869.072	6765.203	1166.8505	3933.7085
190	C09676	222.198365	Guaiol	Sesquiterpenoids	+	12.1	6201.681505	76.85	3139.265753	3139.26575266667	76.85	8828.000001	76.85	2993.90000033333	7599.852997	5814.380499	27219.03851	13544.424002
191	C02099	224.08373	2,3-Dihydro-2-phenyl-4H-benzopyran-4-one	Flavonoids	+	4.93	4050.0585	8711.307	6380.68275	6380.68275	8365.2155	8325.2565	9634.5645	8775.01216666667	13455.3245	5128.8315	16579.995	11721.3836666667
192		224.10486	3,4,5-Trimethoxycinnamyl alcohol	Phenylpropanoids	+	10.4	4522.000003	6874.799998	5698.400001	5698.40000066667	10517.96799	1413.72	1832.463999	4588.050663	7259.680004	4121.752002	10971.664	7451.032002
193	C00673	214.024242	2-Deoxyribose 5'-phosphate	Carbohydrates	+	11.13	4499.228997	5287.8195	4893.524249	4893.52424866667	2744.715498	2131.805499	1984.170497	2286.89716466667	4885.952001	9504.619498	9142.190997	7844.25416533333
194	C00214	242.090273	Thymidine	Nucleotide and its derivates	+	3.04	9959.1945	11770.897	10865.04575	10865.04575	29257.5685	38587.221	23220.826	30355.2051666667	5707.45	4383.6275	793.3275	3628.135
195	C01727	242.080376	Lumichrome	Alkaloids	+	6.7	4833.043	6028.768001	5430.905501	5430.90550066667	3170.7075	3571.003	6067.6755	4269.79533333333	2968.325	10333.989	2061.184	5121.166
196	C00475	243.085522	Cytidine	Nucleotide and its derivates	+	0.7	23393.8375	25650.583	24522.21025	24522.21025	43262.52	57233.27	54408.2055	51634.6651666667	26708.556	33188.0915	16672.261	25522.9695
197	C05198	251.10184	5'-Deoxyadenosine	Nucleotide and its derivates	+	2.41	633433.76	515138.16	574285.96	574285.96	1633990.857	1861300.923	1497012.383	1664101.38766667	1446.964	553215.655	594946.73	383203.116333333
198	C01477	270.052825	Apigenin	Flavonoids	+	9.06	10294.518	15127.153	12710.8355	12710.8355	18987.828	17363.411	17544.9705	17965.4031666667	11587.942	15272.59	14715.222	13858.5846666667
199	C05904	270.052825	Pelargonidin	Flavonoids	+	8.98	9329.0605	6400.7855	7864.923	7864.923	4943.531	13268.331	4078.221	7430.02766666667	9732.812999	11798.123	16016.3555	12515.763833
200	C02495	270.052825	2'-Hydroxydaidzein	Flavonoids	+	8.79	10353.855	6134.534	8244.1945	8244.1945	8842.733	10464.7795	9749.352	9685.6215	15026.6795	16599.5495	12541.338	14722.5223333333
201	C08730	270.052825	Sulfuretin	Flavonoids	+	8.9	7389.583	6400.7855	6895.18425	6895.18425	4222.134	5407.5325	8861.0335	6163.56666666667	9732.812999	16599.5495	10944.068	12425.476833
202	C14313	270.052825	3',4',7-Trihydroxyisoflavone	Flavonoids	+	8.98	7514.313	7420.825	7467.569	7467.569	4355.196	4599.632	12494.0435	7149.62383333333	2298.799	4084.803	7107.87	4497.15733333333
203	C10037	270.052825	Resokaempferol	Flavonoids	+	8.79	11342.767	10972.507	11157.637	11157.637	9696.5345	9166.084	3344.4495	7402.356	11830.0325	7866.2635	4546.042	8080.77933333333
204	C10113	270.052825	Norwogonin	Flavonoids	+	11.83	11097.0525	11836.93049	11466.9915	11466.9914966667	15930.57751	5929.499997	76.85	7312.309169	21937.208	12699.3315	13065.25301	15900.5975033333
205	C06561	272.068475	Naringenin chalcone	Flavonoids	+	6.54	302960.83	214522.5525	258741.6913	258741.691266667	122532.477	192790.8735	125367.8685	146897.073	328370.6545	381578.7195	501479.209	403809.527666667
206	C10372	272.10486	9-Methoxy-alpha-lapachone	Quinones	+	6.51	18460.3915	17310.372	17885.38175	17885.38175	60397.21	45360.687	41147.5725	48968.4898333333	31119.412	16222.476	11802.544	19714.8106666667
207	C08578	272.068475	Butein	Chalcones	+	7.07	4949.3975	7294.696	6122.04675	6122.04675	4544.1925	16894.4455	9411.694	10283.444	9531.382	7606.0165	6790.698	7976.03216666667
208	C18218	272.235145	16-Hydroxy hexadecanoic acid	Lipids	+	6.51	2198.745	4902.233	3550.489	3550.489	5704.771	3264.03	8651.1575	5873.3195	5340.256	6352.077	9216.3385	6969.55716666667
209	C09751	272.068475	Garbanzol	Flavonoids	+	9.9	3551.027997	4019.002	3785.014999	3785.01499866667	3382.167001	5895.6405	2318.497998	3865.43516633333	7280.455503	9697.4405	7620.029001	8199.30833466667
210	C06528	294.173213	Cinchonine	Alkaloids	+	11.99	7668.103007	4958.783498	6313.443253	6313.44325266667	76.85	6104.589998	5014.089001	3731.84299966667	12158.85299	3326.032499	8799.376006	8094.75383166667
211	C11635	294.173213	Tombozine	Alkaloids	+	8.31	1030.365	3541.65	2286.0075	2286.0075	1300.32	3847.095	2143.68	2430.365	3420.48	3828.09	3234.42	3494.33
212	C11379	294.173213	(-)-Cinchonidine	Alkaloids	+	11.99	22092.3025	7537.999998	14815.15125	14815.1512493333	6993.024497	14111.109	8421.488499	9841.87399866667	8347.925496	12599.4965	5919.406505	8955.60950033333
213	C10462	294.18311	6-Gingerol	Phenols	+	11.99	11145.117	2269.3405	6707.22875	6707.22875	2936.467502	10182.835	4407.001999	5842.10150033333	76.85	6875.638501	76.85	2343.11283366667
214	C00170	297.089561	5'-S-Methyl-5'-thioadenosine	Nucleotide and its derivates	+	3.99	1561838.766	1299670.277	1430754.522	1430754.52166667	4902759.183	5505725.555	3740340.273	4716275.00366667	994746.086	1192475.75	937949.364	1041723.73333333
215	C00106	112.027278	Uracil	Nucleotide and its derivates	+	1.91	26330.1535	11833.6735	19081.9135	19081.9135	21706.3675	29982.2965	17903.6195	23197.4278333333	12055.5215	15447.0165	4991.02	10831.186
216	C08019	301.131409	Oxymorphone	Phenanthrenes and derivatives	+	11.18	4446.698005	22176.684	13311.691	13311.6910016667	15692.74601	10055.8205	1571.500002	9106.68883733333	30643.66251	11801.07501	15081.99801	19175.57851
217	C10105	302.042655	Morin	Flavonoids	+	7.71	5833.813	10790.491	8312.152	8312.152	5124.831	16487.2075	10584.8735	10732.304	13261.42	22861.406	18630.7075	18251.1778333333
218	C00389	302.042655	Quercetin	Flavonoids	+	8.07	8825.3935	36933.1175	22879.2555	22879.2555	80295.4175	75724.116	85813.6105	80611.048	42077.797	19095.968	16039.863	25737.876
219	C10177	302.042655	Robinetin	Flavonoids	+	6.83	331416.558	205128.9865	268272.7723	268272.772266667	452741.7395	506531.8275	386599.929	448624.498666667	431394.604	533990.832	368195.7585	444527.064833333
220	C01851	303.147059	Scopolamine	Alkaloids	+	6.86	29728.13	20365.819	25046.9745	25046.9745	18154.296	48808.7255	27104.042	31355.6878333333	37791.538	55079.8945	52495.2245	48455.5523333333
221	C00020	347.063087	Adenosine 5'-monophosphate	Nucleotide and its derivates	+	1.38	433100.389	283099.841	358100.115	358100.115	1291612.644	1179005.542	886243.9965	1118954.06083333	175707.2755	279824.5775	190112.434	215214.762333333
222	C09868	150.104465	(R)-Menthofuran	Prenol lipids	+	5.15	51916.6245	51260.132	51588.37825	51588.37825	73289.646	74493.799	49406.5555	65730.0001666667	41046.483	48835.5525	44337.32	44739.7851666667
223	C13342	150.06808	1-(4-Hydroxyphenyl)propan-1-one	Phenylpropanoids	+	9.9	3868.862	2746.487	3307.6745	3307.6745	2354.2555	793.41	988.035	1378.56683333333	1926.5315	4028.53	2858.7775	2937.94633333333
224	C02646	150.06808	p-Coumaryl alcohol	Phenylpropanoids	+	4.15	16413.8645	1426.0245	8919.9445	8919.9445	24925.76	2449.92	2230.08	9868.58666666667	13873.9815	3321.291	4594.0855	7263.11933333333
225	C13846	283.287514	Octadecanamide	Fatty Acyls	+	13.02	38117.72647	33720.15704	35918.94176	35918.9417566667	49092.01652	51061.3325	36556.854	45570.0676733333	34721.48051	34579.11248	28249.23797	32516.61032
226	C14748	320.235145	20-HETE	Fatty Acyls	+	13.28	3453.711501	3108.586499	3281.149	3281.149	2160.043998	794.5175012	2088.485001	1681.01550006667	3560.747998	4037.796	927.7539996	2842.09933253333
227		338.24571	Kirenol	Diterpenoids	+	13.16	1651.090999	35871.31503	18761.20301	18761.203013	38582.202	1845.2605	2665.405501	14364.2893336667	50396.96447	50055.6265	29444.25502	43298.9486633333
228	C00146	94.041865	Phenol	Phenols	+	2.09	140499.023	4700.918501	72599.97075	72599.9707503333	127933.9775	145060.685	5107.4905	92700.7176666667	62816.486	18756.2065	4589.86	28720.8508333333
229	C09976	326.15181	Uncinatone	Diterpenoids	+	11.01	6954.646998	11130.43949	9042.543244	9042.543244	3984.826503	4244.194497	5040.019502	4423.01350066667	10369.6005	19219.2625	13282.5975	14290.4868333333
230		326.115425	Moracin O	Phenols	+	9.52	9470.502001	10194.8195	9832.660751	9832.66075066667	15371.0995	14814.04	19398.331	16527.8235	123030.1355	131231.698	137082.5575	130448.130333333
231	C09294	328.11582	Anisatin	Sesquiterpenoids	+	5.42	7140.608	17383.338	12261.973	12261.973	8351.059	16975.9255	20127.0065	15151.3303333333	12992.957	18828.4655	20560.476	17460.6328333333
232		328.16746	Guaiacin	Lignans	+	7.54	2270.652	1214.765	1742.7085	1742.7085	76.85	76.85	478.295	210.665	2121.1955	1977.9375	1757.4	1952.17766666667
233	C02353	329.052522	Adenosine 2',3'-cyclic phosphate	Purine nucleotides	+	1.86	14825.3115	12353.2145	13589.263	13589.263	49703.9725	53642.062	23001.392	42115.8088333333	5283.5585	3112.3275	5805.4745	4733.78683333333
234	C10193	330.073955	Tricin	Flavonoids	+	9.31	20167.9015	5917.0235	13042.4625	13042.4625	7142.2395	10409.4015	5446.805	7666.14866666667	8296.636	15280.512	8924.2305	10833.7928333333
235	C17670	330.073955	Aurantio-obtusin	Anthraquinones	+	10.28	17641.67951	8931.256999	13286.46825	13286.468253	4167.057498	4181.799997	8023.143499	5457.33366466667	17456.145	9423.869002	11367.766	12749.2600006667
236	C17055	330.167855	Picrocrocin	Monoterpenoids	+	9.25	5292.351	4333.974	4813.1625	4813.1625	7541.1915	250.56	5820.511	4537.42083333333	21594.836	4927.4865	9269.6005	11930.641
237	C09125	334.21441	Lathyrol	Diterpenoids	+	7.15	5713.1295	1934.6275	3823.8785	3823.8785	4086.6735	5063.578	2213.4775	3787.90966666667	8448.0565	4265.053	1378.4485	4697.186
238		334.21441	ent-16beta,17-dihydroxy-9(11)-kauren-19-oic acid	Diterpenoids	+	7.15	6298.461	5871.06	6084.7605	6084.7605	9776.819	11017.11	9355.333	10049.754	4185.792	15342.0225	3912.181	7813.33183333333
239	C10410	335.173274	Triangularine	Alkaloids	+	11.72	51715.1445	64541.52703	58128.33577	58128.3357666667	9946.348992	3502.083499	28084.66901	13844.367167	23578.7925	76.85	21335.939	14997.1938333333
240	C10523	336.099775	Psoralidin	Coumarins	+	11.8	26996.9795	30336.66951	28666.82451	28666.8245066667	15151.931	7998.067503	17375.14	13508.379501	19082.46899	76.85	11546.5155	10235.2781633333
241		337.188924	3alpha,6beta-Ditigloyloxytropan-7beta-ol	Alkaloids	+	13.21	847981.7635	832353.8895	840167.8265	840167.8265	546228.3685	157261.2665	519713.5918	407734.408933333	1099608.467	941522.2883	592198.5177	877776.424333333
242	C04677	338.062753	AICAR	Imidazole ribonucleosides and ribonucleotides	+	13.28	50825.10404	57195.81354	54010.45879	54010.45879	41272.23899	8617.368001	28514.47899	26134.695327	64080.35398	74998.254	38722.40301	59267.0036633333
243		338.15181	8-Geranyloxypsoralen	Coumarins	+	13.29	111146.2646	108236.9321	109691.5984	109691.598366667	66834.51701	16362.79101	69528.99197	50908.7666633333	188537.5804	142336.9105	99703.21353	143525.901476667
244	C09139	338.199428	Coronaridine	Alkaloids	+	11.43	497340.9828	226140.8794	361740.9311	361740.9311	1206.936501	600759.6944	652271.9611	418079.530667	217033.0731	262098.038	209045.3969	229392.169333333
245	C22152	338.15181	Bergamotine	Coumarins	+	13.03	6018.033496	5642.641008	5830.337252	5830.337252	7355.963003	5515.44	4532.774001	5801.39233466667	4360.101501	2806.515501	76.85	2414.48900066667
246		338.115425	Methyl tanshinonate	Diterpenoids	+	11.43	12369.93899	4901.6115	8635.775245	8635.775245	2435.727499	2462.051001	3049.116999	2648.96516633333	4971.290501	1906.758	5398.081997	4092.04349933333
247	C02918	136.063663	3-Carbamyl-1-methylpyridinium (1-Methylnicotinamide)	Pyridines and derivatives	+	6.36	230155.4115	110756.1885	170455.8	170455.8	368218.236	441723.821	268321.412	359421.156333333	268800.0865	237383.122	135479.1685	213887.459
248	C00548	136.05243	Phenyl acetate	Phenol esters	+	10.56	13342.327	14478.3905	13910.35875	13910.35875	3493.896497	2628.611001	8510.839503	4877.78233366667	6386.285501	17549.99801	5457.609997	9797.96450266667
249	C04203	136.100048	N,N-Dimethyl-1,4-phenylenediamine	Amines	+	2.56	24038.495	13808.7025	18923.59875	18923.59875	92921.3285	59105.253	49662.4345	67229.672	25090.717	17288.1225	10535.933	17638.2575
250	C07215	136.05243	2-Methylbenzoic acid	Benzene and substituted derivatives	+	8.83	10981.288	10839.8215	10910.55475	10910.55475	4014.7455	9009.3275	6022.1415	6348.73816666667	10676.8	13627.3835	7035.632501	10446.6053336667
251	C10315	254.05791	Chrysophanol	Anthraquinones	+	7.46	4342.245	2477.1955	3409.72025	3409.72025	4867.682	5781.9295	3039.51	4563.0405	4292.707	3352.0355	6063.8975	4569.54666666667
252	C10208	254.05791	Daidzein	Flavonoids	+	8.5	3963.1835	6692.4245	5327.804	5327.804	6669.52	3244.997	3211.907	4375.47466666667	4474.0415	7151.865	7781.45	6469.11883333333
253	C17237	254.072514	S-(Phenylacetothiohydroximoyl)-L-cysteine	Amino acid related compounds	+	11.56	9322.227003	13467.23101	11394.72901	11394.7290076667	15056.385	7267.427	13887.1775	12070.3298333333	10788.574	18522.14051	6767.1345	12025.94967
254		254.05791	7,8-Dihydroxyflavone	Flavonoids	+	7.38	4237.146	5088.435	4662.7905	4662.7905	8331.6315	10129.441	6399.3315	8286.80133333333	7306.879	13726.5235	17068.2245	12700.5423333333
255	C12123	254.05791	4',7-Dihydroxyflavone	Flavonoids	+	7.69	10290.0125	4488.6	7389.30625	7389.30625	13399.275	8313.721999	9375.19	10362.7289996667	18695.7235	14871.7455	19914.1005	17827.1898333333
256	C09165	254.094295	Chalepensin	Coumarins	+	7.62	9078.85	6117.1565	7598.00325	7598.00325	3854.419	10169.283	6022.3545	6682.01883333333	5900.3185	8510.9085	7221.185	7210.804
257	C08316	338.31848	Erucic acid	Fatty Acyls	+	13.28	355483.9877	323625.6457	339554.8167	339554.8167	253055.227	51270.99301	271643.4859	191989.90197	444204.1493	374041.5561	249563.9856	355936.563666667
258	C14773	338.24571	8,9-DiHETrE	Fatty Acyls	+	13.03	65743.36495	66336.90157	66040.13326	66040.13326	70534.38804	74744.33349	72035.5685	72438.0966766667	77970.71501	49288.79847	24610.15498	50623.22282
259		342.219495	Guggulsterone E&Z	Steroids	+	11.08	76.85	4790.484	2433.667	2433.667	4997.666003	2639.694498	506.3264997	2714.56233356667	583.5824993	509.3234997	1042.854501	711.920166666667
260	C10433	342.095085	1-O-Caffeoylglucose	Carbohydrates	+	4.92	13558.186	2884.002	8221.094	8221.094	7101.8195	14620.9285	10030.973	10584.5736666667	21293.074	9302.265501	7077.133499	12557.491
261	C01970	342.116215	beta-Lactose	Carbohydrates	+	4.57	29608.312	19515.6475	24561.97975	24561.97975	7758.262	61717.691	32774.8645	34083.6058333333	17072.9595	18305.083	14495.664	16624.5688333333
262	C00942	345.047437	Guanosine 3',5'-cyclic monophosphate	Nucleotide and its derivates	+	2.26	8362.023001	7502.794999	7932.409	7932.409	34108.763	30843.6795	23137.2965	29363.2463333333	3467.524	1383.732	3055.036	2635.43066666667
263		354.095085	1-Caffeoylquinic acid	Phenylpropanoids	+	4.63	7434.4755	5208.236	6321.35575	6321.35575	2668.117	10829.6255	9697.176	7731.6395	5328.5245	4415.628	3159.739	4301.29716666667
264	C01850	360.08452	Rosmarinic acid	Phenylpropanoids	+	6.99	4251.254999	1572.661	2911.958	2911.95799966667	6481.765	4908.176001	3391.0285	4926.98983366667	3918.669	2111.108	4275.711	3435.16266666667
265	C08817	412.370515	Fucosterol	Steroids	+	12.08	76.85	8338.838496	4207.844248	4207.844248	1437.051501	7612.695501	2812.305	3954.017334	76.85	3080.1375	17555.88601	6904.29117
266	C00180	122.03678	Benzoic acid	Phenols	+	5.95	61360.305	21043.7795	41202.04225	41202.04225	109916.8565	129195.0455	70286.1055	103132.669166667	34599.6945	26222.652	13910.272	24910.8728333333
267	C00633	122.03678	4-Hydroxybenzaldehyde	Phenols	+	1.91	1195168.27	464036.811	829602.5405	829602.5405	1893095.956	1978790.718	846055.7605	1572647.47816667	549230.2035	291602.6615	151171.2605	330668.041833333
268	C00153	122.048013	Nicotinamide	Alkaloids	+	1.01	16179.05	34937.5415	25558.29575	25558.29575	111462.766	44240.864	9114.354	54939.328	26487.9955	17971.84	4489.808	16316.5478333333
269	C14386	122.073165	3-Ethylphenol	Phenols	+	10.56	38871.44152	58242.011	48556.72626	48556.72626	25969.2465	29367.5075	42744.699	32693.8176666667	23474.54249	29881.46301	26228.42898	26528.1448266667
270	C04785	310.21441	13(S)-HPOT	Fatty acyls	+	11.47	13383.2375	10321.6055	11852.4215	11852.4215	4368.8835	1847.000001	12775.881	6330.588167	16823.5555	9961.295998	21006.928	15930.593166
271	C07580	310.19328	Cannabinol	Phenols	+	11.75	13755.6975	11694.88301	12725.29026	12725.2902566667	15669.66099	12965.208	25080.8325	17905.23383	26263.11449	23556.21651	19832.9945	23217.4418333333
272		310.12051	Moracin C	Phenols	+	13.99	6759.222998	5004.943003	5882.083001	5882.08300066667	8316.126003	7378.810504	5634.761002	7109.89916966667	3863.291	4531.209503	5150.571997	4515.02416666667
273		310.21441	Sterebin A	Diterpenoids	+	11.75	190895.9926	76.85	95486.4213	95486.4213	236098.0261	287066.8259	272366.9192	265177.257066667	38546.52702	36537.19149	31397.02251	35493.58034
274		458.170748	Valechlorine	Iridoids	+	0.63	47429.9365	55167.3645	51298.6505	51298.6505	79620.1205	70308.855	80528.645	76819.2068333333	6175.446	13154.4955	6191.591	8507.1775
275	C16526	310.28718	cis-Gondoic acid	Lipids	+	13.4	1600.887999	2294.3535	1947.62075	1947.62074966667	1670.404001	2388.066999	2707.818001	2255.429667	1475.5545	1446.0775	1906.861001	1609.497667
276	C05984	104.047345	2-Hydroxybutanoic acid	Organic acids	+	0.64	406257.719	83164.1095	244710.9143	244710.914266667	383672.397	360086.556	176220.8465	306659.933166667	282861.2625	53843.885	36323.7165	124342.954666667
277	C14829	314.24571	12,13-DHOME	Fatty Acyls	+	11.88	5273.909996	8391.307998	6832.608997	6832.608997	10349.34901	743.9220003	5562.288999	5551.85333643333	2273.500002	5639.815998	6076.7475	4663.3545
278	C01835	504.16904	Maltotriose	Organooxygen compounds	+	1.23	1527365.083	2113272.659	1820318.871	1820318.871	2217032.215	3333030.592	2222369.743	2590810.85	3169042.685	3685136.589	4489757.301	3781312.19166667
279	C03661	504.16904	1-Kestose	Organooxygen compounds	+	0.74	12638.25	10442.1975	11540.22375	11540.22375	43529.4735	34356.5905	18079.105	31988.3896666667	8058.3135	35706.5255	26025.0935	23263.3108333333
280	C00417	174.01644	cis-Aconitic acid	Organic acids and derivatives	+	1.46	718757.7075	284251.4	501504.5538	501504.553766667	1442311.647	1592640.561	717222.553	1250724.92033333	163356.032	73568.512	32009.197	89644.5803333333
281	C01047	174.100443	L-Theanine	Amino acid and derivatives	+	0.85	17046.98	6746.7975	11896.88875	11896.88875	10597.099	14240.7425	17313.8905	14050.5773333333	6408.1275	3829.3965	4054.199	4763.90766666667
282	C08304	174.115698	Gramine	Alkaloids	+	8.73	7812.672	4865.954	6339.313	6339.313	5911.1445	5206.9905	4289.5245	5135.8865	8875.6655	4269.126	2799.7195	5314.837
283	C10061	228.04226	Euxanthone	Xanthones	+	8.37	76.85	3162.984	1619.917	1619.917	76.85	4330.082	76.85	1494.594	1856.349	2128.757	747.585	1577.56366666667
284	C10307	580.17921	Cascaroside A	Anthraquinones	+	5.05	40032.0615	30995.419	35513.74025	35513.74025	95732.1905	86572.917	81437.1315	87914.0796666667	16528.6925	21040.3735	10277.3625	15948.8095
285		580.17921	Glucoliquiritin	Flavonoids	+	5.07	40032.0615	30995.419	35513.74025	35513.74025	95732.1905	86572.917	81437.1315	87914.0796666667	16528.6925	21040.3735	10277.3625	15948.8095
286	C09793	580.17921	Narirutin	Flavonoids	+	11.92	114922.0805	76.85	57499.46525	57499.46525	85336.96998	60679.341	110582.237	85532.8493266667	131872.2984	126527.321	120663.4519	126354.3571
287	C10890	580.215595	Acanthoside B	Lignans	+	6.51	5829.833	19433.194	12631.5135	12631.5135	19965.032	35621.902	9584.905	21723.9463333333	27852.3615	17864.0985	23343.844	23020.1013333333
288		292.07356	Karanjin	Flavonoids	+	11.67	13282.398	76.85	6679.624	6679.624	8756.6265	14704.2895	10509.02849	11323.31483	21803.2905	21345.19649	12988.326	18712.2709966667
289	C07632	292.24023	Androstanediol	Steroids and steroid derivatives	+	10.57	12017.35499	3834.782499	7926.068745	7926.06874466667	1809.500001	1896	2477.3805	2060.960167	8307.433503	5095.303505	76.85	4493.19566933333
290	C01226	292.203845	12-OPDA	Fatty Acyls	+	11.4	5758.499997	1884.500001	3821.499999	3821.499999	1809.500001	1896	2477.3805	2060.960167	8307.433503	5095.303505	5164.315001	6189.01733633333
291	C02273	370.074745	4-O-alpha-D-Galactopyranuronosyl-D-galacturonic acid	Organooxygen compounds	+	11.43	5851.500003	1908.002499	3879.751251	3879.751251	5083.395497	5110.728	5561.5035	5251.87566566667	5199.316505	8430.352998	12314.35251	8648.00733766667
292	C09216	352.058305	Daphnoretin	Coumarins	+	11.45	11683.94	7016.556498	9350.248249	9350.248249	7570.773497	8960.64	14848.8585	10460.0906656667	9646.295007	6471.294	11659.13451	9258.907839
293	C09781	388.13695	Geniposide	Iridoids	+	5.14	32936.7685	14900.739	23918.75375	23918.75375	23448.0615	27419.15	13641.394	21502.8685	26876.9615	21360.494	12926	20387.8185
294	C16908	220.182715	Caryophyllene oxide	Sesquiterpenoids	+	11.66	63854.72901	28887.45801	46371.09351	46371.09351	36092.48849	25666.17549	10546.616	24101.7599933333	40654.33751	8142.508501	29065.466	25954.1040036667
295	C00745	162.115698	L-Nicotine	Alkaloids	+	2.29	5580.146	5568.0865	5574.11625	5574.11625	5184.179	2916.1405	4875.605499	4325.308333	7034.513	2939.5075	6267.1125	5413.711
296	C06358	162.06808	Methyl cinnamate	Phenylpropanoids	+	4.9	602462.217	220756.867	411609.542	411609.542	1357241.713	1869547.847	879764.277	1368851.279	432482.922	319240.4835	198207.4855	316643.630333333
297	C08387	410.448765	1-Octacosanol	Miscellaneous	+	13.2	35888.75603	28478.41802	32183.58703	32183.5870266667	21131.63	4863.098503	8837.169497	11610.6326666667	26641.36799	23490.42451	18734.1645	22955.319
298	C09627	236.17763	Capsidiol	Prenol lipids	+	9.52	1828.1925	1041.113	1434.65275	1434.65275	897.776	1149.685	719.1199999	922.193666633333	2879.532	5318.427	478.6144999	2892.19116663333
299	C17501	218.167065	Cyperotundone	Prenol lipids	+	11.13	5110.3395	5426.052003	5268.195752	5268.19575166667	4628.320001	2955.827002	2500.019	3361.38866766667	3300.355499	3937.461501	3308.826501	3515.54783366667
300		196.14633	Nerylacetate	Monoterpenoids	+	8.37	4321.5135	2627.0415	3474.2775	3474.2775	2426.949	3501.878	1971.785	2633.53733333333	5175.798	1962.145	4440.78	3859.57433333333
301	C08580	596.38656	Astaxanthin	Miscellaneous	+	13.56	1201.992	4733.819998	2967.905999	2967.905999	3662.2085	1704.7325	3127.074998	2831.338666	3309.6705	3241.815499	4808.837499	3786.77449933333
302	C09755	610.189775	Hesperidin	Flavonoids	+	6.81	14020.316	6565.56	10292.938	10292.938	9175.1685	14033.08	12488.708	11898.9855	9054.477001	25289.788	18594.278	17646.1810003333
303	C09806	610.189775	Neohesperidin	Flavonoids	+	6.77	14020.316	6565.56	10292.938	10292.938	19416.333	13686.1135	12488.708	15197.0515	9054.477001	25289.788	18594.278	17646.1810003333
304		610.15339	Quercetin 3-O-neohesperidoside	Flavonoids	+	6.59	6295.6445	7797.9505	7046.7975	7046.7975	16931.704	21840.244	32148.429	23640.1256666667	13011.52	15633.6775	9329.1935	12658.1303333333
305	C00089	342.116215	Sucrose	Carbohydrates	+	0.89	2962938.623	1629760.571	2296349.597	2296349.597	2912460.008	3736153.079	2597438.2	3082017.09566667	2368507.16	3731972.253	3176581.343	3092353.58533333
306	C19636	342.116215	Turanose	Fatty Acyls	+	0.79	2387019.747	1939703.964	2163361.856	2163361.85566667	2912460.008	3315058.726	4397840.477	3541786.40366667	2280370.403	3731972.253	2476857.979	2829733.545
307	C07064	342.116215	Lactulose	Organooxygen compounds	+	0.77	2387019.747	1939703.964	2163361.856	2163361.85566667	2912460.008	3315058.726	4397840.477	3541786.40366667	2280370.403	3731972.253	2476857.979	2829733.545
308	C00670	257.102826	Glycerophosphocholine	Cholines	+	1.47	16154.554	3627.7125	9891.13325	9891.13325	33129.5885	44696.9435	31518.0275	36448.1865	280.755	3262.253	2830.665	2124.55766666667
309	C06244	59.037114	Acetamide	Alkaloids	+	13.95	701936.7613	1163917.876	932927.3187	932927.318666667	1269702.691	1742265.726	588506.0204	1200158.1458	732641.8868	1325168.993	539785.8689	865865.5829
310	C00103	260.029722	Glucose 1-phosphate	Organooxygen compounds	+	13	93749.10243	78780.08958	86264.59601	86264.5960066667	112691.1766	119262.685	82059.97449	104671.278696667	64769.60051	80594.70297	87309.93393	77558.0791366667
311	C00275	260.029722	Mannose 6-phosphate	Organooxygen compounds	+	13.03	914.862	5641.197008	3278.029504	3278.029504	5196.637002	4283.106999	9508.269498	6329.337833	2813.588001	4489.309496	3574.223497	3625.706998
312	C09224	289.167794	Mesembrine	Alkaloids	+	5.11	4993.4625	14145.879	9569.67075	9569.67075	9515.164	12026.51	4033.7555	8525.14316666667	7331.5	5798.293	2307.423	5145.73866666667
313	C12187	289.131409	Pseudolycorine	Alkaloids	+	4.76	6864.606	2948.8565	4906.73125	4906.73125	8551.187499	36353.0225	13967.1395	19623.7831663333	13316.497	17023.8195	76.85	10139.0555
314	C06856	653.221283	Bromocriptine	Ergoline and derivatives	+	12.04	72256.77601	40082.32249	56169.54925	56169.54925	21243.92601	20068.88701	21175.71151	20829.5081766667	8757.5145	6849.624001	74460.975	30022.7045003333
315	C00410	314.22458	Progesterone	Steroids	+	11.6	12485.33251	11676.9745	12081.15351	12081.1535066667	8804.945499	21439.1355	15474.9395	15239.6734996667	14291.818	10071.533	22766.22299	15709.8579966667
316	C10538	446.1213	Trifolirhizin	Flavonoids	+	8.21	28129.7905	16625.385	22377.58775	22377.58775	13618.872	14442.962	23060.7175	17040.8505	31629.8215	16289.953	20543.357	22821.0438333333
317	C02452	152.120115	(S)-(-)-Perillyl alcohol	Monoterpenoids	+	11.6	49654.7145	21312.70399	35483.70925	35483.7092466667	15615.254	25048.523	15006.4555	18556.7441666667	32539.99051	13930.36401	19874.6765	22115.01034
318	C01983	152.047345	Mandelic acid	Phenols	+	11.6	23847.907	21762.89549	22805.40125	22805.4012466667	6597.223499	13961.848	14466.8045	11675.2919996667	20953.22849	10518.0055	20522.3505	17331.19483
319	C01674	424.169313	N,N'-diacetylchitobiose	Organooxygen compounds	+	0.77	6041	76.85	3058.925	3058.925	9720.1835	4710.694	4737.4175	6389.43166666667	76.85	1099.314	549.343	575.169
320	C09783	494.178815	Harpagoside	Iridoids	+	6.59	11027.9905	10724.041	10876.01575	10876.01575	13013.7475	5676.984501	7023.031	8571.25433366667	17246.852	21584.4685	20795.2285	19875.5163333333
321	C10492	494.1213	Salvianolic acid A	Phenylpropanoids	+	7.75	2043.158	15840.24	8941.699	8941.699	4347.639	31277.389	3390.1005	13005.0428333333	4444.86	5518.887999	8444.838	6136.195333
322	C09213	246.136828	Hypaphorine	Alkaloids	+	8.37	375.872	2782.9	1579.386	1579.386	3682.824	1032.375	517.641	1744.28	798.7634999	725.8085	1131.986	885.5193333
323	C09601	246.125595	Xanthatin	Sesquiterpenoids	+	8.39	2636.254	2537.165	2586.7095	2586.7095	3672.8885	4287.768	1422.191	3127.61583333333	7259.976	6345.24	7949.79	7185.002
324		246.125595	Curcolone	Sesquiterpenoids	+	8.37	2636.254	2537.165	2586.7095	2586.7095	3672.8885	4287.768	1422.191	3127.61583333333	7593.818	6345.24	7949.79	7296.28266666667
325	C01504	132.057515	1-Indanone	Indanes	+	12.3	16913.66101	6715.999992	11814.8305	11814.8305006667	13979.6155	7969.320499	4826.382004	8925.106001	13896.746	5851.816002	11584.3415	10444.3011673333
326	C06010	132.04226	(S)-2-Acetolactate	Keto acids and derivatives	+	1.32	17985.947	5416.428	11701.1875	11701.1875	9794.913001	6004.9595	7186.514	7662.12883366667	7096.185	5016.9255	1432.178	4515.09616666667
327	C00310	150.052825	D-Xylulose	Carbohydrates	+	1.76	18295.6455	3836.4785	11066.062	11066.062	36853.932	45864.8625	24034.5845	35584.4596666667	5037.672	5716.862	3112.9655	4622.49983333333
328		408.15729	9-Hydroxycalabaxanthone	Xanthones	+	13.29	5222.490002	5852.811	5537.650501	5537.650501	3962.8075	779.5020007	4370.669999	3037.65983323333	2722.330499	5309.351501	3115.360001	3715.680667
329	C08748	720.26294	Azadirachtin	Triterpenoids	+	11.32	17254.63799	1849.5	9552.068995	9552.068995	10305.7725	1112.8985	1686.500001	4368.39033366667	1168.917499	1161.5805	9489.493995	3939.99733133333
330	C00365	308.040955	dUMP	Pyrimidine nucleotides	+	0.76	21027.4125	29025.1375	25026.275	25026.275	24769.372	20613.3005	32012.956	25798.5428333333	25654.902	48494.1915	20359.3625	31502.8186666667
331	C10029	282.08921	Chrysin dimethylether	Flavonoids	+	11.39	38241.91398	3126.9135	20684.41374	20684.41374	5620.5	6031.8315	2418.728499	4690.353333	4494.784996	16853.98099	2510.705503	7953.157163
332	C09538	282.146725	Artemisinin	Sesquiterpenoids	+	13.02	115018.7554	106539.7731	110779.2643	110779.264266667	109106.7076	108368.6095	102826.91	106767.409033333	68025.79352	66557.43398	80893.96945	71825.7323166667
333	C13715	282.16198	Miltirone	Diterpenoids	+	12.98	748942.8854	629958.9732	689450.9293	689450.9293	1190.112	884376.508	737832.5599	541133.059966667	511666.4491	526405.9273	524537.3237	520869.900033333
334		282.146725	Octyl Gallate	Phenols	+	12.97	326.7664998	10858.18551	5592.476005	5592.47600493333	1011.625501	9505.022	8936.718502	6484.45533433333	8429.541504	1724.6325	6509.899493	5554.69116566667
335	C01035	145.085127	4-Guanidinobutyric acid	Organic acids	+	1.31	74013.3195	27590.035	50801.67725	50801.67725	64951.418	45444.0045	25261.7475	45219.0566666667	43260.1605	30781.4005	11206.0055	28415.8555
336	C04076	145.073894	Allysine(6-Oxo DL-Norleucine)	Amino acid and derivatives	+	0.77	13658.984	10871.3045	12265.14425	12265.14425	19618.3335	28592.8675	474.925	16228.7086666667	2157.255	3757.3485	2799.096	2904.5665
337	C09289	232.14633	Alantolactone	Sesquiterpenoids	+	11.93	35003.724	25008.95749	30006.34075	30006.3407466667	43230.091	31964.26301	30132.3945	35108.91617	46925.51604	42013.46249	63742.42555	50893.80136
338	C09484	232.14633	Isoalantolactone	Sesquiterpenoids	+	12.31	9939.384003	3638.9715	6789.177752	6789.17775166667	2549.480503	3430.047503	7245.992004	4408.50667	17725.07899	3466.338	4706.624502	8632.68049733333
339	C09930	232.07356	Altholactone	Phenols	+	10.56	30858.78651	6391.275999	18625.03125	18625.031253	6714.8785	1566	2940.7625	3740.547	4822.606502	5547.290499	59589.13299	23319.6766636667
340	C10748	232.193948	Aloperine	Alkaloids	+	7.22	277554.483	189854.4815	233704.4823	233704.482266667	146000.784	198244.401	82365.23549	142203.473496667	546820.919	203374.6695	463473.6055	404556.398
341		285.266779	(2S,3R,4E)-2-Amino-4-heptadecene-1,3-diol	Alkaloids	+	11.14	10903.98101	76.85	5490.415505	5490.415505	9294.045498	7325.310496	5795.990004	7471.78199933333	29630.3855	11352.122	28652.85247	23211.7866566667
342	C08797	556.30362	Cucurbitacin E	Triterpenoids	+	11.93	5944.743	45065.7395	25505.24125	25505.24125	76.85	18729.04201	2204.499999	7003.464003	76.85	4553.636504	76.85	1569.112168
343	C16922	386.24571	Bufalin	Steroids and steroid derivatives	+	5.05	18705.3005	33814.702	26260.00125	26260.00125	31182.9015	49550.227	22653.6665	34462.265	48130.0465	40451.9365	31460.263	40014.082
344		386.26684	Cryptomeridiol 11-rhamnoside	Sesquiterpenoids	+	8.31	4088.175	1477.35	2782.7625	2782.7625	1868.37	6711.6	3719.1	4099.69	9003.75	4913.685	2104.62	5340.685
345	C02140	346.21441	Corticosterone	Steroids and steroid derivatives	+	6.11	74684.885	51128.375	62906.63	62906.63	120337.087	130451.9955	87447.449	112745.5105	133982.853	146719.134	107196.835	129299.607333333
346	C10573	346.215746	Calycanthine	Alkaloids	+	7.32	3094.8965	76.85	1585.87325	1585.87325	1042.213	76.85	76.85	398.637666666667	4073.373	76.85	4652.204	2934.14233333333
347	C13712	318.25588	Allopregnanolone	Steroids and steroid derivatives	+	11.58	8214.269995	2967.924501	5591.097248	5591.097248	1907.344	1193.5965	5396.406498	2832.44899933333	629.0369993	76.85	3220.476499	1308.78783276667
348	C02052	666.221865	Maltotetraose	Carbohydrates	+	0.64	503.829	32520.55	16512.1895	16512.1895	12042.357	74471.525	70879.883	52464.5883333333	43370.1665	434.122	53870.344	32558.2108333333
349	C01613	666.221865	Stachyose	Organooxygen compounds	+	0.73	36184.5175	32520.55	34352.53375	34352.53375	49485.073	74471.525	70879.883	64945.4936666667	43370.1665	47951.0955	53870.344	48397.202
350	C12128	274.084125	(-)-Epiafzelechin	Flavonoids	+	5.66	1436378.787	830322.286	1133350.537	1133350.53666667	3466300.707	4635548.91	3740296.988	3947382.20166667	370511.295	351102.83	316810.8945	346141.673166667
351	C10053	274.04774	Bellidifolin	Xanthones	+	12.05	7358.295504	18219.728	12789.01175	12789.0117513333	2944.596999	1604.499999	754.0785007	1767.72516623333	17628.63751	2540.031501	8307.543	9492.07067033333
352		274.04774	1,3,6-Trihydroxy-5-methoxyxanthone	Xanthones	+	12.08	7358.295504	18219.728	12789.01175	12789.0117513333	2944.596999	1604.499999	754.0785007	1767.72516623333	17628.63751	2540.031501	8307.543	9492.07067033333
353	C05588	197.105194	Metanephrine	Phenols	+	2.13	1143.824	1439.634	1291.729	1291.729	1527.5	746.997	924.2779999	1066.2583333	733.807	1484.481	1658.01	1292.09933333333
354	C08618	442.38108	Betulin	Triterpenoids	+	12.32	1102.217499	10513.828	5808.02275	5808.02274966667	5444.679996	6118.172999	2913.915997	4825.589664	4487.525501	9976.409003	6137.369001	6867.10116833333
355	C01468	108.057515	p-Cresol	Phenols	+	7.28	14461.724	10511.021	12486.3725	12486.3725	16828.301	13307.0835	3381.3935	11172.2593333333	5522.393	13618.407	15639.6285	11593.4761666667
356	C09640	193.110279	(-)-Salsoline	Tetrahydroisoquinolines	+	4.25	3893.3065	2920.58	3406.94325	3406.94325	3274.429	6739.903	2489.9645	4168.09883333333	6856.161	5003.368	2903.311	4920.94666666667
357	C09962	193.073894	Gentioflavin	Alkaloids	+	4.93	18557.068	5257.517	11907.2925	11907.2925	33447.8195	47002.662	31043.869	37164.7835	2394.948	8054.5005	3562.011	4670.4865
358	C07313	265.091002	Streptozotocin	Organooxygen compounds	+	0.72	16233.0885	5054.206	10643.64725	10643.64725	109688.8135	126272.8335	122923.532	119628.393	11133.9545	8805.29	5388.62	8442.6215
359	C01494	194.05791	Ferulic acid	Phenylpropanoids	+	4.86	84752.941	70628.38	77690.6605	77690.6605	146340.549	206986.78	181131.808	178153.045666667	47363.034	53962.5875	32495.6225	44607.0813333333
360	C10470	194.05791	3-Hydroxy-4-methoxycinnamic acid	Phenylpropanoids	+	4.87	35256.7345	24114.0795	29685.407	29685.407	78366.6635	84723.9425	69124.923	77405.1763333333	21697.1435	20379.566	17893.057	19989.9221666667
361	C10477	194.05791	Methyl caffeate acid	Phenylpropanoids	+	4.6	7818.465	4053.342	5935.9035	5935.9035	8797.158	31038.601	15639.9435	18491.9008333333	16349.9275	4776.846	7366.6365	9497.80333333333
362	C08532	287.115759	Lycorine	Alkaloids	+	7.59	2461.1165	4079.1945	3270.1555	3270.1555	2771.235	2527.265	8700.1745	4666.22483333333	8164.093999	2759.3565	5253.741	5392.39716633333
363		287.115759	Pipermethystine	Alkaloids	+	7.57	2207.768	5778.98	3993.374	3993.374	8167.3195	6441.3015	4013.21	6207.277	4360.251	8439.8795	6613.135	6471.0885
364		442.09	(-)-Epicatechin gallate	Flavonoids	+	6.2	15746.625	12578.81	14162.7175	14162.7175	8801.155	5009.137	1701.3315	5170.54116666667	4665.4425	5295.9395	1816.8435	3926.07516666667
365		442.09	(-)-Catechin gallate(CG)	Flavonoids	+	5.97	4107.5845	8228.471	6168.02775	6168.02775	3709.897	3596.0865	6445.9095	4583.96433333333	6386.167	5993.0165	4836.1455	5738.443
366		622.189775	Pectolinarin	Flavonoids	+	8.23	4142.4505	7474.34	5808.39525	5808.39525	8455.348001	15264.4915	6363.003	10027.614167	28623.0365	12099.589	11965.476	17562.7005
367	C10077	422.084915	Mangiferin	Xanthones	+	5.14	6369.3415	4562.069	5465.70525	5465.70525	2945.589	6680.776	7784.8615	5803.74216666667	7609.8975	7661.516001	14191.6345	9821.01600033333
368	C09760	394.21441	Kazinol A	Flavonoids	+	13.26	9239.188007	7804.383	8521.785504	8521.78550366667	9193.821001	2107.381501	8563.140996	6621.44783266667	9851.731493	12601.8265	2709.266996	8387.60832966667
369	C10417	394.14164	Deguelin	Flavonoids	+	13.46	6085.358506	2074.3185	4079.838503	4079.838503	2318.1635	2170.651501	1791.262001	2093.35900066667	3817.607501	1892.282499	1166.4945	2292.12816666667
370	C07480	180.064726	Theobromine	Alkaloids	+	3.27	2802.4825	2737.647	2770.06475	2770.06475	1684.476	2916.3035	1218.5515	1939.777	6592.135	4562.474	7985.5305	6380.0465
371	C05380	180.053493	Nicotinurate	Carboxylic acids and derivatives	+	3.27	23621.6735	5467.627	14544.65025	14544.65025	70335.3755	6322.147	10026.3035	28894.6086666667	18223.665	26663.003	14364.937	19750.535
372	C01481	180.04226	Caffeic acid	Phenylpropanoids	+	4.44	37893.247	2072.682	19982.9645	19982.9645	59071.3195	62865.312	2636.4675	41524.3663333333	28666.1255	27448.4045	23432.1185	26515.5495
373	C05584	198.052825	4-Hydroxy-3-methoxymandelate	Phenols	+	3.27	21596.4345	15313.4275	18454.931	18454.931	13516.8945	22593.4215	10487.024	15532.4466666667	38765.9605	37696.2765	29142.833	35201.69
374		612.205425	Neosperidin dihydrochalcone	Chalcones	+	12.46	17617.93549	689.4764993	9153.705995	9153.70599476667	36569.61149	3726.236499	12462.53099	17586.1263263333	10597.588	507.492	614.8845	3906.65483333333
375	C00127	612.151966	Glutathione oxidized	Amino acid and derivatives	+	2.52	2396.948	3418.0765	2907.51225	2907.51225	6925.2915	1737.992	6937.7325	5200.33866666667	2193.85	2723.301	1517.895	2145.01533333333
376		570.282885	Ganoderic acid F	Triterpenoids	+	12.97	8369.830501	2622.304004	5496.067253	5496.06725266667	2852.482	2037.6655	4219.703	3036.61683333333	1012.987499	5374.679002	6116.380508	4168.01566966667
377	C09264	340.079435	Esculin	Coumarins	+	4.23	7469.8595	3719.3925	5594.626	5594.626	12947.162	7436.8985	3724.168	8036.07616666667	5772.143	1761.885	2044.685	3192.90433333333
378	C08633	464.29266	Pristimerin	Triterpenoids	+	6.85	17033.227	11428.6915	14230.95925	14230.95925	9990.6415	24741.7825	8102.0195	14278.1478333333	27884.175	26293.0635	18172.553	24116.5971666667
379	C08835	464.31379	Ponasterone A	Steroids	+	6.19	33963.811	32338.2745	33151.04275	33151.04275	41816.1105	53090.128	31593.3155	42166.518	37409.901	30349.762	29386.27	32381.9776666667
380	C00402	133.037509	D-Aspartic acid	Alkaloids	+	0.76	268831.7845	129690.047	199260.9158	199260.915766667	382646.0605	189362.2745	317084.859	296364.398	131013.0875	49102.11	73326.2435	84480.4803333333
381	C10815	793.424859	Protoveratrine A	Alkaloids	+	11.73	9762.385996	20645.92701	15204.1565	15204.156502	13571.29849	6369.417504	8659.116	9533.27733133333	19234.63551	15538.7465	10206.6195	14993.3338366667
382		592.17921	Linarin	Flavonoids	+	7.65	2371.018	112706.258	57538.638	57538.638	14297.036	12306.3715	6433.871	11012.4261666667	386397.874	511262.003	335789.6225	411149.833166667
383		206.141913	Agrocybenine	Alkaloids	+	5.03	321450.649	271480.2855	296465.4673	296465.467266667	478635.5085	480115.475	405167.2495	454639.411	336530.8885	347474.058	242092.928	308699.2915
384	C09311	206.05791	Scoparone	Coumarins	+	5.06	70520.919	59469.419	64995.169	64995.169	129330.4	120687.516	96406.0685	115474.6615	110038.653	110120.589	90368.179	103509.140333333
385	C09690	206.167065	alpha-Irone	Prenol lipids	+	5.05	659510.7945	599113.911	629312.3528	629312.352766667	1068163.605	962043.818	877273.9685	969160.463833333	709276.3645	713057.1621	504144.7585	642159.428366667
386	C10476	206.094295	Ethyl trans-p-methoxycinnamate	Cinnamic acids and derivatives	+	4.97	41195.1985	28767.4255	34981.312	34981.312	58523.273	29856.4805	377738.2135	155372.655666667	27860.298	19943.061	24489.9405	24097.7665
387	C14086	206.05791	2-Hydroxy-3-methylbenzalpyruvate	Cinnamic acid and its derivatives	+	5.07	317430.5955	256058.187	286744.3913	286744.391266667	432651.901	375455.422	377738.2135	395281.8455	354528.002	337605.738	240802.722	310978.820666667
388		206.05791	3-Methoxy-4,5-methylenedioxycinnamaldehyde	Phenylpropanoids	+	5.04	71337.5105	40788.556	56063.03325	56063.03325	88191.094	7975.5135	102977.924	66381.5105	62765.3525	61831.1185	57400.7335	60665.7348333333
389	C10614	217.110279	Securinine	Alkaloids	+	11.74	13862.1265	12563.187	13212.65675	13212.65675	10749.643	6710.084001	3018.578503	6826.10183466667	7418.217493	6019.426502	10344.48649	7927.37682833333
390	C00051	307.083808	Glutathione	Amino acid and derivatives	+	2.02	1438.5335	3256.1255	2347.3295	2347.3295	6654.5905	12817.291	5702.7705	8391.55066666667	906.2794999	983.1889999	2102.2175	1330.56199993333
391	C08533	307.069204	Narciclasine	Alkaloids	+	4.12	2628.2575	1994.82	2311.53875	2311.53875	2397.375	3484.5145	2222.0535	2701.31433333333	422.625	634.5	630.75	562.625
392	C05843	152.058578	N1-Methyl-4-pyridone-3-carboxamide	Pyridines and derivatives	+	2.66	5302.305	4387.655	4844.98	4844.98	13592.8825	17284.9215	7316.164501	12731.3228336667	3487.639	9365.231001	3026.451	5293.10700033333
393	C05593	152.047345	3-Hydroxyphenylacetic acid	Phenols	+	5.06	103057.555	61926.6755	82492.11525	82492.11525	180449.448	209306.909	114203.315	167986.557333333	115029.0575	87404.75851	75505.819	92646.5450033333
394		152.08373	4-(Ethoxymethyl)phenol	Phenols	+	2.63	23166.51	19160.491	21163.5005	21163.5005	15031.509	26667.6565	14306.7375	18668.6343333333	33857.06	10559.8905	19575.542	21330.8308333333
395	C00808	152.120115	(+)-Camphor	Monoterpenoids	+	6.5	22864.967	7977.724001	15421.3455	15421.3455003333	9055.926	23123.4415	6704.722	12961.3631666667	31522.697	9240.6755	4761.7755	15175.0493333333
396	C09893	152.120115	Pulegone	Monoterpenoids	+	5.9	322747.208	216072.331	269409.7695	269409.7695	479847.5205	593481.603	387212.6575	486847.260333333	372558.644	370341.952	287556.247	343485.614333333
397	C00755	152.047345	Vanillin	Phenols	+	5.9	1135263.275	892588.0875	1013925.681	1013925.68116667	1901898.798	2232766.238	1518693.704	1884452.91333333	1624190.776	1754491.735	1305925.095	1561535.86866667
398	C04043	152.047345	3,4-Dihydroxyphenylacetaldehyde	Benzene and substituted derivatives	+	4.05	1730.855	2127.8985	1929.37675	1929.37675	3306.296	2530.416	2310.266	2715.65933333333	805.2135	997.101	767.372	856.562166666667
399	C09307	386.136555	(+)-Pteryxin	Coumarins	+	11.11	6681.791004	5324.144499	6002.967752	6002.96775166667	6651.688998	4180.824	5169.000006	5333.837668	4648.571496	7730.457003	4714.960001	5697.99616666667
400	C09922	386.10017	Cleomiscosin A	Coumarins	+	5.74	31930.707	22097.625	27014.166	27014.166	9845.2005	11115.5215	5570.649001	8843.79033366667	49588.879	44386.652	57927.1055	50634.2121666667
401	C10561	386.17294	Pinoresinol dimethyl ether	Lignans	+	5.15	26027.852	16966.264	21497.058	21497.058	42867.573	33484.374	25198.4625	33850.1365	55714.387	37566.1345	39179.775	44153.4321666667
402		252.078645	4'-Methoxyflavone	Flavonoids	+	11.4	44428.781	8279.499999	26354.1405	26354.1404996667	30387.78402	35140.7445	17743.4295	27757.31934	49611.9275	33023.22048	29268.448	37301.19866
403	C10628	252.11503	trans-Hinokiresinol	Lignans	+	10.62	10237.68149	3227.819497	6732.750494	6732.75049366667	5955.535002	1607.499999	2176.125501	3246.386834	9244.301008	21056.09401	10199.4205	13499.938506
404	C10106	420.15729	Morusin	Flavonoids	+	4.9	9108.4125	44307.7185	26708.0655	26708.0655	19047.244	14456.906	2288.96	11931.0366666667	45416.4455	14752.991	15249.317	25139.5845
405	C11264	238.062995	7-Hydroxyflavone	Flavonoids	+	0.56	5991.8555	5883.783	5937.81925	5937.81925	19923.564	33557.594	23627.8635	25703.0071666667	2138.4355	2356.916	3225.9985	2573.78333333333
406	C16773	238.19328	Bisabolol oxide A	Sesquiterpenoids	+	11.5	16997.44599	11145.323	14071.3845	14071.3844966667	17504.7295	13968.9845	16826.74049	16100.1514966667	18390.91799	16568.47451	23966.70952	19642.0340066667
407	C05174	325.131409	Cheilanthifoline	Miscellaneous	+	14.13	76.85	373.4719999	225.161	225.160999966667	486.2164999	76.85	521.4989999	361.521833266667	76.85	747.6740005	498.0379997	440.854000066667
408	C00408	129.078979	L-Pipecolic acid	Amino acid and derivatives	+	0.69	1663666.586	734730.8065	1199198.696	1199198.69616667	1690584.378	1792406.85	1115703.326	1532898.18466667	933696.6725	414060.8535	274118.0305	540625.1855
409	C02237	129.042594	Pyrrolidonecarboxylic acid	Carboxylic acids and derivatives	+	0.67	1663666.586	734730.8065	1199198.696	1199198.69616667	1690584.378	1792406.85	1115703.326	1532898.18466667	933696.6725	414060.8535	274118.0305	540625.1855
410		594.158475	Safflor Yellow A	Chalcones	+	12.34	11143.324	9576.104503	10359.71425	10359.714251	2666.000001	6755.687995	6953.159507	5458.282501	2307.423	7112.232996	13514.664	7644.773332
411		594.158475	Meloside A	Flavonoids	+	4.86	3151.5845	5951.363	4551.47375	4551.47375	4829.749	13043.379	4844.392	7572.50666666667	3008.084	14828.5185	4653.337	7496.6465
412	C09830	594.19486	Poncirin	Flavonoids	+	8.16	4432.39	3886.4885	4159.43925	4159.43925	10473.2985	4626.91	5346.1025	6815.437	8582.2725	5232.166	6195.005	6669.8145
413	C08725	594.158475	Pelargonidin-3,5-O-diglucoside chloride	Flavonoids	+	5.67	20742.8115	11414.0925	16078.452	16078.452	54796.3395	60158.594	37383.2715	50779.4016666667	28720.228	13278.632	12494.778	18164.546
414		594.158475	Chrysoeriol 7-apiosylglucoside	Flavonoids	+	5.32	16895.789	15889.2845	16392.53675	16392.53675	56746.55	67947.4475	23821.659	49505.2188333333	20499.083	22495.759	14047.4085	19014.0835
415	C08752	410.157685	Bruceine D	Diterpenoids	+	4.84	22242.361	18982.583	20612.472	20612.472	78547.926	22161.668	55168.627	51959.407	44582.266	43734.784	22638.565	36985.205
416	C08954	750.45543	alpha-Hederin	Triterpenoids	+	8.16	6035.2235	5662.0245	5848.624	5848.624	2972.342	11929.5745	8115.0015	7672.306	24335.3555	22911.3085	10776.922	19341.1953333333
417	C12627	578.16356	Rhoifolin	Flavonoids	+	6.38	83477.4	68080.963	75779.1815	75779.1815	378811.285	175629.03	116972.615	223804.31	67934.31599	53378.19549	43760.565	55024.3588266667
418	C16981	578.16356	Kaempferitrin	Flavonoids	+	5.69	4168.05	9991.372	7079.711	7079.711	8530.31	5014.98	1059.495	4868.26166666667	2014.514	4235.76	495.535	2248.603
419	C10190	372.120905	Tangeretin	Flavonoids	+	11.37	8236.605496	10098.20201	9167.403753	9167.403753	3755.337501	385.7999998	414.2399998	1518.45916686667	15698.59898	18106.63	1231.467999	11678.898993
420		372.15729	Tetrahydrocurcumin	Phenols	+	9.38	3380.1985	6125.861999	4753.03025	4753.03024966667	2900.774	4427.6675	1315.1535	2881.19833333333	3520.135	5534	3309.795	4121.31
421	C10545	372.15729	Arctigenin	Lignans	+	11.39	5067.1395	10606.4605	7836.8	7836.8	5626.5	2368.462501	1210.271499	3068.41133333333	17625.7885	4247.226498	19331.42598	13734.8136593333
422	C10892	372.193675	Veraguensin	Lignans	+	6.75	42749.3865	32986.881	37868.13375	37868.13375	80312.97	78585.8715	73115.5235	77338.1216666667	64731.724	65971.9095	39479.5225	56727.7186666667
423	C10443	368.12599	Curcumin	Phenols	+	5.69	4938.629	2179.739	3559.184	3559.184	11695.9195	17837.973	16167.9635	15233.952	8984.959001	11915.176	3249.633	8049.922667
424	C09800	374.1213	Swertiamarin	Iridoids	+	4.82	3993.192	6167.397001	5080.294501	5080.29450066667	11273.7805	7348.157	9346.841	9322.92616666667	3633.959	1664.362	5677.504	3658.60833333333
425		564.12678	Theaflavin	Flavonoids	+	7.61	701654.505	644390.4155	673022.4603	673022.460266667	1883662.805	1941870.081	1843254.783	1889595.88966667	372989.2665	380142.1665	388735.231	380622.221333333
426	C16803	564.14791	Glucofrangulin B	Anthraquinones	+	5.69	6507.028	2922.075	4714.5515	4714.5515	16515.662	25094.844	5528.8445	15713.1168333333	8063.478	6474.15	4639.353	6392.327
427	C00187	386.354865	Cholesterol	Steroids and steroid derivatives	+	11.86	17332.9865	5344.713999	11338.85025	11338.8502496667	7322.921005	5991.835003	6528.421503	6614.39250366667	13341.50201	7255.783493	11891.11801	10829.4678376667
428	C01189	386.354865	Lathosterol	Steroids and steroid derivatives	+	11.8	5938.626	4177.607499	5058.11675	5058.11674966667	5690.761499	76.85	5067.456999	3611.68949933333	3768.550001	17432.3165	8805.871998	10002.2461663333
429	C01796	120.04226	Erythrose	Organooxygen compounds	+	3.05	55432.98	30123.946	42778.463	42778.463	76688.943	65977.27	66174.016	69613.4096666667	44745.094	60301.5305	48366.6715	51137.7653333333
430	C02083	120.057515	Styrene Oxide	Benzene and substituted derivatives	+	5.94	17754.556	2565.73	10160.143	10160.143	6582.443	12816.464	14653.602	11350.8363333333	8586.999	5101.9405	7214.7575	6967.899
431	C14533	120.0939	1,2,4-Trimethylbenzene	Benzene and substituted derivatives	+	5.71	31517.6885	12143.444	21830.56625	21830.56625	49545.696	19878.1535	16562.3725	28662.074	19537.7735	14277.8665	9500.766501	14438.802167
432	C03975	179.044325	Isoxanthopterin	Pteridines and derivatives	+	3.26	16390.8975	7729.383501	12060.1405	12060.1405003333	32229.17	32805.396	18298.04	27777.5353333333	5880.224	8095.7	5806.2275	6594.0505
433	C16995	270.25588	Methyl hexadecanoic acid	Fatty Acyls	+	9.78	8140.869	14489.3755	11315.12225	11315.12225	4495.210999	4358.075	8118.394	5657.22666633333	13840.2215	3706.425	5983.3435	7843.33
434		307.251129	Fingolimod hydrochloride	Miscellaneous	+	13.11	1629.135499	3808.015004	2718.575252	2718.57525166667	2508.512503	3481.472002	779.895	2256.62650166667	1366.227	1284.417	1607.403999	1419.349333
435	C01789	400.370515	Campesterol	Steroids and steroid derivatives	+	12.18	16709.051	11735.52299	14222.287	14222.2869966667	34266.74299	39533.62401	28988.8005	34263.0558333333	32816.69502	23866.21049	19643.02499	25441.9768333333
436	C00261	106.041865	Benzaldehyde	Phenols	+	2.82	146892.341	59040.944	102966.6425	102966.6425	233759.386	233458.9615	128876.814	198698.387166667	37354.0555	20680.8795	30954.985	29663.3066666667
437	C08287	141.078979	L-Hypoglycin A	Carboxylic acids and derivatives	+	0.52	4747.956	1725.114	3236.535	3236.535	5864.169	5030.913	3993.2125	4962.76483333333	2000.8125	4180.5785	2181.525	2787.63866666667
438	C10034	538.09	Cupressuflavone	Flavonoids	+	9.67	2520.43	4289.0645	3404.74725	3404.74725	2138.796	1504.272	2884.783	2175.95033333333	2312.915	2556.652	3452.13	2773.899
439	C08745	538.11113	Lithospermic acid	Phenylpropanoids	+	7.12	4180.07	7842.275	6011.1725	6011.1725	3273.7425	5097.288	1687.8555	3352.962	23627.3645	21676.278	18502.9015	21268.848
440	C05990	462.116215	Isoscoparin	Flavonoids	+	6.23	994519.885	967251.4875	980885.6863	980885.686266667	1117702.006	1388699.14	1120117.175	1208839.44033333	1500486.148	1742271.034	1551550.299	1598102.49366667
441	C10187	462.116215	Swertiajaponin	Flavonoids	+	13.86	1838.049	3263.647499	2550.84825	2550.84824966667	1979.254	5418.655001	3025.049	3474.31933366667	1267.626001	1111.521	2385.542001	1588.22966733333
442	C12141	462.116215	Peonidin-3-glucoside	Flavonoids	+	6.93	448142.5405	376310.496	412226.5183	412226.518266667	563542.918	769877.899	695205.1265	676208.647833333	717155.3585	874221.032	739000.404	776792.264833333
443	C12639	464.09548	Quercetin-7-O-beta-D-glucopyranoside	Flavonoids	+	6.1	41985.965	29852.144	35919.0545	35919.0545	60628.331	89499.196	44199.9145	64775.8138333333	66905.2135	89665.0515	85039.994	80536.753
444	C16422	464.131865	Hesperetin 7-O-glucoside	Flavonoids	+	6.07	24537.601	29852.144	27194.8725	27194.8725	60628.331	89499.196	44199.9145	64775.8138333333	66905.2135	89665.0515	85039.994	80536.753
446	C04109	318.03757	Gossypetin	Flavonoids	+	6.46	119000.227	104108.4195	111554.3233	111554.323266667	207629.369	219731.0075	180873.64	202744.672166667	186059.818	178289.804	133696.551	166015.391
447	C09732	596.174125	Eriocitrin	Flavonoids	+	5.94	913.8525001	3400.192	2157.02225	2157.02225003333	8466.4155	3079.3	2820.475	4788.73016666667	9405.0185	4338.7725	920.61	4888.13366666667
448	C10501	624.205425	Verbascoside	Phenylpropanoids	+	6.14	4396.3735	3975.980499	4186.177	4186.17699966667	6268.045	1686.6945	4034.37	3996.36983333333	4301.362	7075.544001	2497.663	4624.85633366667
449	C17531	466.11113	Plantagoside	Flavonoids	+	6.85	10191.2625	5329.538	7760.40025	7760.40025	8429.9925	7138.6405	5168.338	6912.32366666667	17607.082	26660.8325	17814.4415	20694.1186666667
450	C09765	466.147515	Agnuside	Iridoids	+	12.37	2961.425497	8008.877507	5485.151502	5485.151502	12333.01151	12865.20551	17243.88799	14147.3683366667	76.85	16154	12308.5015	9513.11716666667
451	C08840	412.370515	alpha-Spinasterol	Steroids and steroid derivatives	+	13.32	11594.41551	18089.121	14841.76826	14841.7682566667	9774.562496	717.7039995	6530.116996	5674.1278305	12981.15449	11738.87	5161.722498	9960.58232933333
452	C02253	234.148061	Benzoylagmatine		+	10.56	40268.054	52038.062	46153.058	46153.058	25659.18398	53280.64248	33844.221	37594.6824866667	61353.24344	59613.23603	51884.90149	57617.1269866667
453	C09350	234.16198	Bakkenolide A	Miscellaneous	+	11.85	14178.9915	8333.408003	11256.19975	11256.199751	6701.325497	19073.99599	7539.081001	11104.8008293333	18896.79899	4815.289998	22867.177	15526.421996
454	C10426	234.08921	1'-Acetoxychavicol acetate	Phenols	+	10.55	12778.722	9651.033999	11214.878	11214.8779996667	2698.880001	76.85	5436.461001	2737.39700066667	26109.85799	10583.277	9643.451497	15445.528829
455	C18326	234.136828	N-p-Coumaroyl putrescine	Phenolamides	+	4.16	5006.6405	1212.3055	3109.473	3109.473	9827.232499	9227.498	5378.732	8144.48749966667	2064.2295	1306.954	4320.36	2563.84783333333
456		234.16198	beta-Costic acid	Sesquiterpenoids	+	8.9	31518.415	4019.862	17769.1385	17769.1385	18237.1435	12133.4645	24257.876	18209.4946666667	37461.509	30640.4335	24276.5975	30792.8466666667
457	C05151	616.39752	12-O-tetradecanoylphorbol-13-acetate	Diterpenoids	+	12.49	4356.5445	6800.687009	5578.615755	5578.61575466667	3595.153002	3184.999998	3400.660501	3393.60450033333	4188.286002	2578.0155	11902.91901	6223.073504
458	C11527	168.04226	p-Hydroxymandelic acid	Phenols	+	3.36	25922.868	3336.905	14629.8865	14629.8865	75337.959	79462.06949	7606.9055	54135.6446633333	5277.7615	39859.3715	31598.711	25578.6146666667
459	C05770	654.268966	Coproporphyrin III	Tetrapyrroles and derivatives	+	11.85	36453.70598	15819.726	26136.71599	26136.71599	44181.41952	26972.74751	54277.45603	41810.54102	46605.80601	13304.60299	55692.97853	38534.46251
460	C00607	463.063195	Chondroitin sulfate	Miscellaneous	+	6.18	67321.299	63673.014	65497.1565	65497.1565	83148.258	76.85	74431.908	52552.3386666667	156664.332	133900.122	120143.7675	136902.7405
461	C07650	263.071763	Gemcitabine	Pyrimidine nucleosides	+	0.75	6584.0705	1792.168	4188.11925	4188.11925	9130.4505	2186.7865	6533.6785	5950.30516666667	4169.9835	1227.947	2733.88	2710.6035
462	C02727	188.116093	N6-Acetyl-L-lysine	Amino acid and derivatives	+	0.81	72775.3735	58032.941	65404.15725	65404.15725	132323.308	129730.306	93465.3185	118506.310833333	37939.428	33464.445	23345.3895	31583.0875
463	C01168	324.03587	Pseudouridine 5'-phosphate	Organooxygen compounds	+	1.16	41893.9005	36338.7435	39116.322	39116.322	101543.4865	114997.5995	33752.2845	83431.1235	41287.367	54895.925	41501.2605	45894.8508333333
464	C10448	182.094295	Dihydroconiferyl alcohol	Phenylpropanoids	+	7.99	9380.007	2945.774	6162.8905	6162.8905	1865.727	5263.9185	5277.9685	4135.87133333333	3058.1875	5996.236	5305.942001	4786.78850033333
465	C05604	195.053159	Leucodopachrome	Indoles and derivatives	+	4.82	10079.4435	5706.0225	7892.733	7892.733	7817.2435	12664.433	2954.994	7812.2235	10637.425	6677.398	8204.504	8506.44233333333
466	C15572	124.05243	Guaiacol	Phenols	+	5.62	18953.649	984.4120001	9969.0305	9969.03050003333	2594.735	4648.787	10874.864	6039.462	1499.498	2229.799	8680.243	4136.51333333333
467	C04779	281.112405	2'-O-Methyladenosine	Purine nucleosides	+	2.72	34617.528	35860.33	35238.929	35238.929	128044.822	164273.5715	165628.7245	152649.039333333	23404.119	18824.3655	37292.7695	26507.0846666667
468	C05595	281.089939	4-Hydroxyphenylacetylglutamic acid		+	12.99	1790394.351	1822486.452	1806440.402	1806440.40166667	2038437.807	2164484.708	1731951.38	1978291.29833333	1443717.548	1197724.406	1444464.156	1361968.70333333
469	C10219	620.06497	Corilagin	Phenols	+	8.44	4318.9375	15358.8285	9838.883	9838.883	16938.0075	7869.716	13167.8025	12658.5086666667	7119.976	18682.755	33678.696	19827.1423333333
470	C02470	205.037509	Xanthurenic acid	Quinolines and derivatives	+	2.96	28019.373	17844.0775	22931.72525	22931.72525	37399.717	37248.903	38861.4385	37836.6861666667	34530.8385	2408.79	3518.16	13485.9295
471	C05660	205.073894	Methoxyindoleacetic acid	Indoles and derivatives	+	3.76	22666.5175	28666.2275	25666.3725	25666.3725	37201.696	51993.523	40772.101	43322.44	28044.446	26430.108	26467.9785	26980.8441666667
472	C03267	260.029722	Beta-D-Fructose 2-phosphate	Organooxygen compounds	+	0.75	524029.351	539206.5135	531617.9323	531617.932266667	1184260.184	1133582.344	1162785.097	1160209.20833333	113933.0505	121119.434	117800.528	117617.670833333
473	C07394	853.330959	Paclitaxel	Diterpenoids	+	11.91	1277672.285	807174.6855	1042423.485	1042423.48516667	193330.5721	11264.04801	436843.1311	213812.583736667	1295167.933	24810.21101	29297.7645	449758.63617
474		788.383055	Dulcoside A	Diterpenoids	+	7.54	3131.5495	1215.487	2173.51825	2173.51825	5527.7215	8217.3575	6738.3565	6827.81183333333	4788.659	6897.3295	3819.4925	5168.49366666667
475	C19579	181.073894	gamma-Hydroxy-3-pyridinebutanoate	Pyridines and derivatives	+	4.36	5163.1705	2390.9155	3777.043	3777.043	13951.2505	3854.919	8562.1325	8789.434	3456.163	76.85	2674.568	2069.19366666667
476	C01536	181.073894	DL-Tyrosine	Alkaloids	+	1.9	194327.707	111150.627	152739.167	152739.167	872005.5235	450298.746	464701.42	595668.563166667	52731.7085	177992.5475	39420.1915	90048.1491666667
477	C08201	181.086957	Acetylcholine chloride	Alkaloids	+	3.31	4504.451	2559.037	3531.744	3531.744	2354.433	1125.696	76.85	1185.65966666667	12674.4355	6358.277	6632.6645	8555.12566666667
478	C04227	153.078979	p-Octopamine	Phenols	+	3.84	2605.334	13972147.28	6987376.307	6987376.307	15446510.86	15493531.83	7170146.453	12703396.381	16312735.34	16287168.27	14535540.24	15711814.6166667
479	C00249	256.24023	Palmitic acid	Lipids	+	12.92	90950.99752	78474.05704	84712.52728	84712.52728	36377.50899	49111.57499	106005.9315	63831.6718266667	62373.32199	26713.31899	86316.61045	58467.7504766667
480	C04271	256.07356	3,9-Dihydroxypterocarpan	Flavonoids	+	9.65	4845.662	755.8725	2800.76725	2800.76725	1619.044	2223.6815	4606.1565	2816.294	3441.308	3439.1915	3239.261	3373.2535
481	C03033	540.257065	Tetrahydroaldosterone-3-glucuronide	Organooxygen compounds	+	0.72	206589.267	56625.3315	131607.2993	131607.299266667	308304.325	242778.7	243997.209	265026.744666667	22249.514	37101.229	13671.3475	24340.6968333333
482	C09794	540.184295	Oleuropein	Iridoids	+	7.4	206276.428	87125.957	146701.1925	146701.1925	254605.2035	292518.2595	138158.585	228427.349333333	195481.7325	225122.6005	224869.712	215158.015
483		144.11503	Ethyl caproate	Miscellaneous	+	0.74	87044.631	52792.4605	69918.54575	69918.54575	91349.1035	79112.1845	37621.1475	69360.8118333333	166197.8845	40323.826	17365.9885	74629.233
484	C04294	143.040485	4-Methyl-5-thiazoleethanol	Azoles	+	2.66	5554.879	76.85	2815.8645	2815.8645	14338.446	12207.9875	6511.24	11019.2245	7717.8975	2877.7725	3991.366	4862.34533333333
485	C08162	296.17763	Exemestane	Steroids and steroid derivatives	+	11.61	27307.2105	75928.05301	51617.63176	51617.6317566667	6272.491503	7851.182496	21977.99351	12033.8891696667	26994.15851	17310.86101	11637.33499	18647.4515033333
486	C18202	170.13068	8-Methylnonenoate	Fatty Acyls	+	2.64	5288.9575	2033.828	3661.39275	3661.39275	4573.749	7725.2565	10076.353	7458.45283333333	5548.899	1313.596	2035.995	2966.16333333333
487		170.13068	2-(2-Hydroxy-2-propyl)-5-methyl-5-vinyltetrahydrofuran	Monoterpenoids	+	5.47	10919.318	7435.062	9177.19	9177.19	14969.654	6295.989	7511.6475	9592.43016666667	9868.1625	6292.125	5366.1825	7175.49
488	C05682	139.987462	Phosphonoacetate	Organic acids	+	1.88	2110.282	2881.8225	2496.05225	2496.05225	5136.289	2021.296	3074.604	3410.72966666667	3199.8335	3845.917	2678.046	3241.2655
489		140.047345	Furfuryl acetate	Miscellaneous	+	5.47	6228.7935	1308.195	3768.49425	3768.49425	8571.15	5153.799499	3271.59	5665.51316633333	7685.5425	2757.6675	5455.0125	5299.4075
490	C10391	333.157624	Seneciphylline	Alkaloids	+	9.06	7061.377001	76.85	3569.113501	3569.11350066667	76.85	76.85	76.85	76.85	76.85	9890.983501	76.85	3348.22783366667
491	C01530	284.27153	Stearic Acid	Fatty Acyls	+	13.02	4608.288496	5546.346503	5077.3175	5077.31749966667	8000.295003	16161.113	4095.4875	9418.96516766667	5027.888502	7651.113501	2182.524998	4953.84233366667
492	C10884	430.16277	Sesartemin	Lignans	+	11.9	46089.28849	46415.64451	46252.4665	46252.4665	28077.06701	45090.91101	66637.00952	46601.6625133333	34717.44502	20429.58802	54126.7285	36424.58718
493		416.21989	gamma-Diasarone	Lignans	+	8.55	1758.8625	8317.192	5038.02725	5038.02725	10275.557	6158.788	5908.748	7447.69766666667	2233.783	5057.26	1313.64	2868.22766666667
494	C08534	285.136494	Galanthaminone	Alkaloids	+	6.91	4119.7025	2512.3	3316.00125	3316.00125	6338.64	12716.008	5960.688	8338.44533333333	6192.266	1485.722	5508.178	4395.38866666667
495	C05176	299.152144	(S)-N-Methylcoclaurine	Isoquinolines and derivatives	+	7.59	2744.447	2401.662	2573.0545	2573.0545	3017.133	2693.861	3526.59	3079.19466666667	2214.4175	2281.9525	3080.89	2525.75333333333
496	C08472	299.079374	Avenanthramide A	Cinnamic acids and derivatives	+	12.07	76.85	38728.72552	19402.78776	19402.78776	10930.8325	23554.94401	17597.8645	17361.21367	24483.46651	22230.45151	40479.96151	29064.62651
497	C09910	147.104799	(S)-Actinidine	Pyridines and derivatives	+	2.8	4561.832	3440.4925	4001.16225	4001.16225	2939.9865	4424.735	1340.2045	2901.642	1679.711	6354.173	2827.348	3620.41066666667
498	C11129	147.032029	1H-Indole-2,3-dione	Indoles and derivatives	+	2.79	155392.6885	121983.2595	138687.974	138687.974	408094.2385	450822.9365	249138.9675	369352.0475	65641.329	63104.3105	46899.0115	58548.217
499		159.125929	Pregabalin	Miscellaneous	+	0.69	88176.7115	46889.145	67532.92825	67532.92825	138606.6865	197983.038	137493.7755	158027.833333333	1009.3845	36173.9615	506.5955	12563.3138333333
500	C11900	586.241415	Baccatin III	Diterpenoids	+	9.95	25928.026	13562.5005	19745.26325	19745.26325	19654.4565	36365.564	37958.1805	31326.067	2635.395998	3714.335999	17761.983	8037.23833233333
501		280.14633	7-(4-Hydroxyphenyl)-1-phenyl-4-hepten-3-one	Phenols	+	12.53	21749.13798	26559.80652	24154.47225	24154.47225	23996.98951	30069.236	20812.64849	24959.6246666667	25175.9905	15680.769	12453.2565	17770.0053333333
502	C00387	283.09167	Guanosine	Nucleotide and its derivates	+	2.65	193082.859	194284.926	193683.8925	193683.8925	689587.466	731293.068	811883.8675	744254.8005	147715.405	198190.999	207521.1315	184475.845166667
503	C08680	343.251129	Denudatine	Alkaloids	+	1.59	73961.139	22447.074	48204.1065	48204.1065	142668.415	497374.3965	417546.84	352529.883833333	16603.646	24960.7895	13834.414	18466.2831666667
504		493.134605	Malvidin-3-O-galactoside	Flavonoids	+	7.75	10472.594	10418.6565	10445.62525	10445.62525	17403.8205	27614.0435	27779.6635	24265.8425	114785.3855	109844.5185	23119.561	82583.155
505	C08713	421.282824	Talatisamine	Alkaloids	+	4.66	2752.4425	9889.046001	6320.744251	6320.74425066667	8658.3305	4188.126	9052.335999	7299.59749966667	4249.388	7405.925	12783.2665	8146.19316666667
506	C16752	480.19955	Acevaltrate	Iridoids	+	5.56	10313.776	27285.0435	18799.40975	18799.40975	58896.6835	72209.46451	75146.7615	68750.9698366667	9529.429999	15182.4645	19138.8845	14616.926333
507		480.10565	2,3-Dehydrosilybin A	Flavonoids	+	5.53	187649.837	7449.32	97549.5785	97549.5785	24448.481	16883.8545	8348.9715	16560.4356666667	43758.6535	22069.548	25462.728	30430.3098333333
508		304.058305	Dihydrorobinetin	Flavonoids	+	5.19	91513.56999	61446.823	76480.1965	76480.1964966667	15505	30136.9705	6035.3335	17225.768	255868.017	215315.7265	197000.601	222728.114833333
509	C10881	536.204635	Schisantherin A	Lignans	+	12.25	383465.4682	42041.29051	212753.3794	212753.37937	3397.993003	5999.851007	76.85	3158.23133666667	119461.2869	57531.73999	76.85	59023.2922966667
510	C08779	486.188985	Rutaevin	Triterpenoids	+	12.58	4297.870503	1566.500001	2932.185252	2932.185252	76.85	1614.999999	2274.136502	1321.99550033333	76.85	1013.839999	3989.832003	1693.507334
511	C08869	534.282885	Helveticoside	Steroids and steroid derivatives	+	6.5	5685.7365	1922.812	3804.27425	3804.27425	3885.333	1354.2125	2744.204	2661.24983333333	3470.328	2416.0235	9222.908	5036.41983333333
512	C16915	534.210115	Arctiin	Lignans	+	8.24	13395.648	2802.3185	8098.98325	8098.98325	7890.78	7630.552	12998.49	9506.60733333333	2575.6885	24861.249	23489.328	16975.4218333333
513	C17048	534.210115	Phillyrin	Phenylpropanoids	+	7.76	16272.9335	12880.9845	14576.959	14576.959	16462.882	12009.366	11389.0815	13287.1098333333	28351.933	15476.82	19504.705	21111.1526666667
514	C07474	208.121178	Pilocarpine	Alkaloids	+	5.04	19058.2255	1189.261	10123.74325	10123.74325	6261.9805	11994.842	13175.1285	10477.317	11463.5535	11462.333	76.85	7667.57883333333
515	C02381	208.07356	6-Methoxymellein	Benzopyrans	+	8.22	1196.204	2756.283	1976.2435	1976.2435	3128.892	1653.365	950.9880001	1911.0816667	663.868	620.606	2734.236	1339.57
516	C09816	208.07356	DL-Benzylsuccinic acid	Phenylpropanoids	+	4.95	3854.695	8146.246501	6000.470751	6000.47075066667	9089.4285	16303.308	3810.667	9734.46783333333	15227.917	3070.945	1211.939	6503.60033333333
517	C09000	306.11034	Cimifugin	Flavonoids	+	4.15	3460.705	439.0815	1949.89325	1949.89325	1533.666	1303.4	13904.6105	5580.55883333333	1283.891	1588.072	890.0425001	1254.00183336667
518	C09557	306.146725	Tenulin	Sesquiterpenoids	+	4.23	3460.705	7367.5495	5414.12725	5414.12725	18601.247	19397.203	13904.6105	17301.0201666667	12017.973	10777.9185	5979.7235	9591.87166666667
519		410.354865	22-Dehydroclerosterol	Steroids	+	12.59	102546.744	40208.38697	71377.56549	71377.5654866667	208143.8535	123664.4429	108046.2301	146618.1755	145743.0575	79739.76502	131200.712	118894.511506667
520	C09164	609.29512	Ergocristine	Alkaloids	+	9.18	8235.224001	6015.108001	7125.166001	7125.166001	15446.218	12377.618	9049.916	12291.2506666667	10669.5015	12639.013	27962.247	17090.2538333333
521	C09219	808.404731	Vinleurosine	Alkaloids	+	11.26	2843.0685	4111.180497	3477.124499	3477.12449866667	14961.3095	76.85	17218.15199	10752.10383	570.9285	1820.499999	1229.281001	1206.90316666667
522	C09273	258.08921	Luvangetin	Coumarins	+	4.48	20760.279	13500.7105	17130.49475	17130.49475	23933.7135	31418.142	16583.089	23978.3148333333	16052.6695	17531.063	14791.004	16124.9121666667
523	C10070	258.052825	Isogentisin	Xanthones	+	7.75	5995.09	3309.4745	4652.28225	4652.28225	6464.705	7147.762	3019.593	5544.02	6088.6635	4294.9005	3491.8245	4625.1295
524	C10087	258.052825	Norlichexanthone	Xanthones	+	4.48	59024.388	53867.5485	56445.96825	56445.96825	94859.45001	103342.5885	82446.72001	93549.5861733333	83715.6075	66520.152	66716.679	72317.4795
525	C00810	88.05243	(R)-Acetoin	Miscellaneous	+	0.53	16265.4655	5140.211	10702.83825	10702.83825	19902.622	13202.61	7834.074	13646.4353333333	9939.547	5229.937	1984.8895	5718.1245
526	C09803	450.116215	Neoastilbin	Flavonoids	+	5.97	20048.9895	13540.502	16794.74575	16794.74575	10806.682	14756.589	23529.5655	16364.2788333333	7632.808	9422.76	3473.8145	6843.1275
527	C10100	760.288365	Kuwanon H	Flavonoids	+	12.04	12584.132	7596.854497	10090.49325	10090.493249	9356.151499	5147.7645	5740.7175	6748.21116633333	6800.500002	3699.353002	6111	5536.95100133333
528	C10237	576.12678	Procyanidin A2	Flavonoids	+	8.38	1109.9415	5131.027001	3120.484251	3120.48425066667	6514.33	3993.9055	2723.2815	4410.50566666667	6391.8135	5366.810001	6635.6165	6131.41333366667
529	C10280	559.314519	Auriculine	Alkaloids	+	7.52	6477.36	3692.1995	5084.77975	5084.77975	2739.4515	7314.013	4278.3625	4777.27566666667	9807.7535	9784.3125	9208.0305	9600.03216666667
530		516.12678	1,4-Dicaffeoylquinic acid	Phenylpropanoids	+	5.77	6899.603	5937.8675	6418.73525	6418.73525	2462.573	15503.325	10896.5105	9620.80283333333	9269.594	14989.578	5177.403	9812.19166666667
531	C10808	429.324294	Sipeimine	Alkaloids	+	13.04	14318.865	8967.252001	11643.0585	11643.0585003333	33677.055	4098.165005	4244.490002	14006.5700023333	12204.214	604.2189992	18349.68602	10386.0396730667
532		867.498024	Beta-Solamarine	Alkaloids	+	7.65	1718.578	242.9445	980.76125	980.76125	76.85	248.681	7560.318	2628.61633333333	250.5435	1282.594	2721.576	1418.23783333333
533	C10853	261.136494	Cochlearine	Alkaloids	+	13.76	486.6289994	1894.819501	1190.72425	1190.72425013333	912.2299997	2183.374999	1181.909	1425.83799956667	1513.642	865.6209996	2753.444502	1710.90250053333
534	C10856	291.147059	Convolvine	Alkaloids	+	5.07	45047.82	35401.8475	40224.83375	40224.83375	58308.612	71856.94	76.85	43414.134	44323.6665	37972.108	20734.1235	34343.2993333333
535	C10863	291.147059	Phyllalbine	Alkaloids	+	5.07	7809492.18	6775932.456	7292712.318	7292712.318	12997632.78	14191640.73	11963216.45	13050829.9866667	9149702.009	9106940.547	8082220.371	8779620.97566667
536	C10875	412.11582	Podophyllotoxinone	Lignans	+	5.42	4800.249	1101.3375	2950.79325	2950.79325	13041.2435	16401.4785	4998.423	11480.3816666667	14347.3515	3387.401	6498.7235	8077.82533333333
537	C11115	110.03678	5-Methyl-2-furaldehyde	Aldehyde	+	0.76	218027.501	178954.193	198490.847	198490.847	182561.613	86714.652	184215.0535	151163.772833333	99831.8175	154895.721	156206.4355	136977.991333333
538		414.215473	Methyl reserpate	Alkaloids	+	7.21	4902.4	76.85	2489.625	2489.625	6400.1015	12968.081	6346.08	8571.42083333333	1324.96	5684.72	1065.76	2691.81333333333
539	C03626	202.142976	NG,NG-Dimethylarginine dihydrochloride	Carboxylic acids and derivatives	+	0.74	145074.247	125838.4395	135456.3433	135456.343266667	337240.7425	376613.1345	301405.5095	338419.7955	44398.032	57113.1255	51068.72	50859.9591666667
540	C14512	118.041865	Benzofuran	Benzofurans	+	5.15	797476.3095	144605.4915	471040.9005	471040.9005	1128801.409	1358884.63	137317.6785	875001.239166667	186310.325	233766.9385	135988.3155	185355.193
541	C06091	645.314914	Aconitine	Alkaloids	+	12.07	8267.2515	8023.978495	8145.614998	8145.61499766667	50887.44002	6169.679502	7533.851496	21530.3236726667	11362.842	11218.01051	76.85	7552.56750333333
542	C06802	645.248019	Acarbose	Alkaloids	+	6.99	5208.062999	2307.921	3757.992	3757.99199966667	1308.724	3042.497	6074.71	3475.31033333333	1870.554	2679.9905	1695.948	2082.16416666667
543	C10553	400.11582	4'-Demethylpodophyllotoxin	Lignans	+	6.43	2535.475	7113.36	4824.4175	4824.4175	4896.166	4335.767	5237.836	4823.25633333333	2247.0235	5984.974	3272.3805	3834.79266666667
544	C10557	400.152205	Yatein	Lignans	+	12.6	3462.391002	13773.106	8617.748501	8617.748501	2065.4835	2643.0285	13589.12849	6099.21349666667	14843.95199	76.85	2299.5	5740.10066333333
545	C17123	428.401815	Epifriedelanol	Triterpenoids	+	12.29	290593.537	7281.339003	148937.438	148937.438001	556746.6565	263569.3521	13977.14799	278097.718863333	4147.167503	3957.999996	4764.475499	4289.88099933333
546	C17458	636.09627	1,3,6-Tri-O-galloylglucose	Phenols	+	5.79	10801.5615	9123.190001	9962.375751	9962.37575066667	31661.818	26532.255	9816.2425	22670.1051666667	15763.7605	30625.342	18265.818	21551.6401666667
547		236.17763	Curcumol	Sesquiterpenoids	+	11.14	52077.23599	1792.514502	26934.87525	26934.8752473333	2041.604502	2680.589498	35274.4335	13332.2091666667	4543.405001	33310.85801	40732.724	26195.662337
548		642.325145	Rubusoside	Diterpenoids	+	4.92	1234.073	5781.4995	3507.78625	3507.78625	13849.619	14207.3585	10623.559	12893.5121666667	6209.7915	4268.4075	2363.642	4280.61366666667
549		428.183505	Garcinone D	Xanthones	+	13.56	2115.881999	2207.777501	2161.82975	2161.82975	2592.091499	4613.014002	3329.021503	3511.375668	2415.297	2771.298	7381.042997	4189.21266566667
550	C00519	109.01975	Hypotaurine	Alkaloids	+	2.24	4675.8555	3016.253	3846.05425	3846.05425	2534.245	3997.7375	3302.8825	3278.28833333333	4991.5675	1299.0885	3912.1395	3400.93183333333
551		522.137345	Salviaflaside	Phenylpropanoids	+	7.12	2141.7465	12045.9955	7093.871	7093.871	3344.3445	6523.259	22527.1815	10798.2616666667	27946.076	28085.3595	3883.848	19971.7611666667
552	C11621	268.07356	Tectochrysin	Flavonoids	+	9.88	973.0429999	5193.306	3083.1745	3083.17449996667	570.6645	1978.155	76.85	875.223166666667	1304.680001	3014.2815	1597.1255	1972.02900033333
553	C00294	268.080771	Inosine	Nucleotide and its derivates	+	2.6	76.85	260284.0325	130180.4413	130180.441266667	753811.732	885706.765	848262.622	829260.373	143887.0685	76.85	254227.621	132730.513166667
554	C09984	268.170139	N-(p-Hydroxyphenethyl)actinidine	Phenols	+	9.87	2745.895	4038.5355	3392.21525	3392.21525	2787.091	4154.2375	6383.2975	4441.542	4577.517	7968.853	3476.726999	5341.032333
555		454.344695	Beta-Elemonic acid	Triterpenoids	+	4.68	5099.384	2297.497	3698.4405	3698.4405	2275.249	5419.5725	3873.473	3856.09816666667	1818.047	6261.666	5183.503	4421.072
556		438.34978	Ganoderol A	Triterpenoids	+	11.31	4771.876998	6251.25	5511.563499	5511.563499	589.41	575.2575007	1210.271499	791.646333233333	18870.538	3222.310998	5667.28	9253.37633266667
557		436.33413	Ganoderal A	Triterpenoids	+	8.09	4300.512	880.425	2590.4685	2590.4685	2296.9395	8570.799999	13358.761	8075.50016633333	10734.3395	6191.6575	6582.3665	7836.12116666667
558		232.037175	8-Hydroxybergapten	Coumarins	+	10.56	14330.868	1676.499999	8003.684	8003.68399966667	34355.233	539.7930007	1060.863501	11985.2965005667	8757.088498	4590.470503	1655.676001	5001.078334
559		592.13695	Mulberrofuran Q	Phenols	+	13.28	6232.139998	786.9645	3509.552249	3509.552249	4000.080503	4232.688	2179.819998	3470.86283366667	996.717	5623.113004	1279.736501	2633.188835
560		184.14633	Undecanolactone	Miscellaneous	+	0.57	4618.1435	6760.249	5689.19625	5689.19625	7928.9495	8301.8595	1178.2375	5803.0155	2926.0605	4311.597	3942.0085	3726.55533333333
561	C00314	169.073894	Pyridoxine	Vitamins	+	1.55	38193.083	27352.973	32773.028	32773.028	58409.89	79364.158	76.85	45950.2993333333	27028.363	36395.44	34682.44	32702.081
562		646.3717	Glycyrrhetic acid 3-O-mono-beta-D-glucuronide	Triterpenoids	+	14.03	826.6644999	76.85	451.75725	451.757249966667	76.85	264.2985	911.3564999	417.501666633333	76.85	76.85	76.85	76.85
563		468.17842	Jangomolide	Triterpenoids	+	13.79	2150.058001	3449.300001	2799.679001	2799.679001	3227.11	1918.076001	76.85	1740.678667	1340.45	1459.109998	2861.576003	1887.04533366667
564		594.137345	Buddlenoid A	Flavonoids	+	8.17	9204.273001	7158.6165	8181.444751	8181.44475066667	12526.8625	10961.9245	10408.199	11298.9953333333	8454.7005	10302.2795	6648.730499	8468.57016633333
565	C02571	203.115759	L-Acetylcarnitine	Fatty Acyls	+	0.69	58514.667	39984.9615	49249.81425	49249.81425	58157.6155	52513.1385	24304.4435	44991.7325	72840.195	32987.7875	32551.648	46126.5435
566	C10421	324.13616	Glabridin	Flavonoids	+	10.93	16333.71601	15022.33651	15678.02626	15678.02626	1220.943499	984.1585013	2287.428	1497.5100001	76.85	13902.25	1599.500001	5192.866667
567	C19632	342.116215	Kojibiose	Fatty Acyls	+	0.72	1920278.057	1742683.004	1831480.531	1831480.53066667	2916149.686	3152366.647	2563140.294	2877218.87566667	2829542.82	3338519.914	1979496.223	2715852.98566667
568	C02477	430.38108	alpha-Tocopherol	Phenols	+	13.37	4805.113497	3527.388	4166.250749	4166.25074866667	1646.802	4635.711	4617.198502	3633.23716733333	3758.848	1362.403	5097.245002	3406.165334
569	C00909	318.219495	Leukotriene A4	Fatty Acyls	+	5.57	11206.7955	3650.4	7428.59775	7428.59775	16906.703	14005.4555	13563.1365	14825.0983333333	4661.665	19136.3505	4999.4015	9599.139
570	C01762	284.075686	Xanthosine	Nucleotide and its derivates	+	2.61	10824.6855	16298.274	13561.47975	13561.47975	40578.434	44262.9935	34103.2925	39648.24	4592.389	11285.7425	12258.707	9378.94616666667
571		284.10486	Homopterocarpin	Flavonoids	+	9.07	18471.642	12677.445	15574.5435	15574.5435	18167.114	20497.53	14340.6455	17668.4298333333	31711.25	24987.6595	14558.46	23752.4565
572	C17045	284.068475	Physcion	Anthraquinones	+	8.24	6356.4535	2020.6665	4188.56	4188.56	1296.8445	2882.6315	2013.7455	2064.40716666667	4540.8355	5559.5415	2043.6895	4048.02216666667
573	C20144	284.17763	Boldione	Steroids and steroid derivatives	+	9.07	12792.5135	10535.359	11663.93625	11663.93625	44522.8495	21098.499	22614.696	29412.0148333333	36789.1265	18869.192	15814.937	23824.4185
574	C01562	284.068475	Calycosin	Flavonoids	+	9.1	9125.367499	4409.355499	6767.361499	6767.361499	7363.56	4444.218	8845.979999	6884.58599966667	6226.654	7110.8415	10682.3635	8006.61966666667
575	C10502	284.068475	(-)-Maackiain	Flavonoids	+	8.48	74987.564	73552.518	74270.041	74270.041	119603.0885	107550.1935	152625.131	126592.804333333	129873.4585	111600.3625	103208.641	114894.154
576	C00777	300.20893	Retinoic acid	Diterpenoids	+	8.46	9455.04	7824.5155	8639.77775	8639.77775	8504.681	16333.3815	13308.167	12715.4098333333	13526.829	16594.0255	20749.78	16956.8781666667
577	C21822	300.20893	Sugiol	Diterpenoids	+	8.21	11168.772	9080.4995	10124.63575	10124.63575	2418.9955	8864.303	4739.4505	5340.91633333333	8730.306	11758.3055	9383.837	9957.48283333333
578	C09734	300.099775	Farrerol	Flavonoids	+	8.46	53509.4525	31774.8095	42642.131	42642.131	46185.247	28253.602	46218.309	40219.0526666667	65169.477	51863.5245	73391.3655	63474.789
579	C00378	264.104482	Thiamine	Vitamins	+	0.7	34429.7015	24257.849	29343.77525	29343.77525	58646.4975	66065.325	58783.648	61165.1568333333	76.85	12507.3345	6406.2785	6330.15433333333
580	C10497	264.147393	N-Feruloyl putrescine	Phenolamides	+	4.33	2184.244	3683.196	2933.72	2933.72	6634.737	3931.483	7100.295999	5888.83866633333	241.684	8404.595	476.765	3041.01466666667
581		264.151415	1,7-Diphenyl-4-hepten-3-one	Phenols	+	5.9	7841.5205	4158.6525	6000.0865	6000.0865	9010.901001	8272.663499	12105.174	9796.24616666667	5407.2185	11244.46	3434.504	6695.39416666667
582		264.11503	Cinnamyl cinnamate	Phenylpropanoids	+	4.26	18181.8985	19857.8185	19019.8585	19019.8585	16042.42	61750.3975	20049.966	32614.2611666667	24422.629	31032.3735	16606.786	24020.5961666667
583	C01933	131.094629	L-Norleucine	Amino acid and derivatives	+	1.81	175442.464	135865.007	155653.7355	155653.7355	210840.5305	201436.0815	346362.057	252879.556333333	41983.737	29110.412	8567.6025	26553.9171666667
584	C16434	131.094629	Isoleucine	Amino acid and derivatives	+	1.8	102209.286	135865.007	119037.1465	119037.1465	210840.5305	201436.0815	136969.8485	183082.1535	41983.737	29110.412	8567.6025	26553.9171666667
585	C02378	131.094629	6-Aminocaproic acid	Fatty Acyls	+	1.84	228112.146	178534.3235	203323.2348	203323.234766667	695407.8185	665550.327	537852.0985	632936.748	111742.463	109738.485	93297.883	104926.277
586	C00430	131.058244	5-Aminolevulinate	Organic acids	+	1.56	20418.057	961.1665	10689.61175	10689.61175	3503.397	2287.7835	666.367	2152.51583333333	6507.449	906.0390001	834.3704999	2749.28616666667
587	C14152	416.36543	Beta-Tocopherol	Phenols	+	12.07	30017.83647	6772.159502	18394.99799	18394.9979873333	76.85	721.1114997	1386.359499	728.106999566667	3736.563	4787.316	76.85	2866.90966666667
588		416.329045	Octadecyl p-coumarate	Phenylpropanoids	+	12.07	93015.02004	311912.8566	202463.9383	202463.938313333	95843.58696	56763.78746	58154.88703	70254.08715	381287.444	336699.332	441601.9135	386529.563166667
589	C00255	376.138286	Riboflavine	Vitamins	+	5.06	37156.03	46291.135	41723.5825	41723.5825	57298.693	78197.418	91786.482	75760.8643333333	23181.1835	61365.0445	35961.4295	40169.2191666667
590	C09440	248.141245	Eupatolide	Sesquiterpenoids	+	7.18	2456.27	2745.079	2600.6745	2600.6745	546.12	2232.486	76.85	951.818666666667	524.964	1675.821	1136.5345	1112.43983333333
591		248.141245	1beta-Hydroxyalantolactone	Sesquiterpenoids	+	5.26	10469.0655	7337.96	8903.51275	8903.51275	15922.241	12149.292	6976.2015	11682.5781666667	15135.5825	11954.8535	6101.561	11063.999
592		248.141245	Pterosin D	Sesquiterpenoids	+	3.29	2833.3955	2029.612	2431.50375	2431.50375	1934.433	4213.3995	2506.798	2884.87683333333	1172.795	876.9465	2179.4925	1409.74466666667
593	C00253	123.032029	Nicotinic acid	Nicotinic acid derivatives	+	0.73	61523.9545	15714.2165	38619.0855	38619.0855	65325.7455	61253.9865	37434.5655	54671.4325	36585.0705	31237.707	10935.9735	26252.917
594	C10164	123.032029	2-Picolinic acid	Organic acids	+	1.33	198319.9935	45651.998	121985.9958	121985.995766667	77197.83	73059.001	22488.933	57581.9213333333	39918.346	16704.198	62705.612	39776.052
595	C01227	288.20893	Dehydroepiandrosterone	Steroids and steroid derivatives	+	5.15	17478.427	23788.873	20633.65	20633.65	32910.2345	50183.353	35071.1455	39388.2443333333	16854.3595	36255.6725	14733.2165	22614.4161666667
596	C05141	288.172545	Estriol	Steroids	+	5.78	12286.237	5536.58	8911.4085	8911.4085	10421.007	22728.4875	14939.6665	16029.7203333333	9190.099	8842.516001	11474.8035	9835.806167
597	C00535	288.20893	Testosterone	Steroids	+	5.98	42359.368	56850.974	49605.171	49605.171	156807.2375	150515.558	171127.731	159483.508833333	24100.275	38910.6865	46228.897	36413.2861666667
598	C10292	288.099775	Shikonin	Quinones	+	5.14	66587.8185	82312.9225	74450.3705	74450.3705	114148.6525	123386.113	125507.237	121014.000833333	86100.2285	177966.371	68085.51751	110717.372336667
599	C10415	288.06339	Dalbergioidin	Flavonoids	+	5.99	121361.57	129885.572	125623.571	125623.571	220136.689	32470.544	28302.066	93636.433	49165.3555	33695.196	26436.0535	36432.2016666667
600	C08724	288.06339	Okanin	Chalcones	+	5.99	829523.517	780377.4005	804950.4588	804950.458766667	2363559.875	2448942.587	2049007.515	2287169.99233333	1025363.263	1158018.567	791079.636	991487.155333333
601	C09471	288.099775	Asebogenin	Chalcones	+	9.07	5883.4695	5900.865	5892.16725	5892.16725	5129.292	1526.348	4158.5265	3604.72216666667	9766.5045	8549.214	17243.409	11853.0425
602	C01378	288.06339	Fustin	Flavonoids	+	7.59	42829.6465	39150.782	40990.21425	40990.21425	56507.006	62467.776	43777.127	54250.6363333333	61863.4575	65989.935	69463.784	65772.3921666667
603	C09277	288.06339	Micromelin	Coumarins	+	5.13	11390.336	20376.043	15883.1895	15883.1895	35254.286	29507.4195	32030.4915	32264.0656666667	14905.71	41404.757	30823.626	29044.6976666667
604	C04056	280.24023	Bovinic acid	Fatty Acyls	+	6.86	15387.246	17006.2735	16196.75975	16196.75975	9858.483999	24365.0475	9794.406	14672.645833	5447.885	21241	2410.188	9699.691
605	C06428	302.22458	Eicosapentaenoic acid	Fatty Acyls	+	6.86	31716.03	30807.723	31261.8765	31261.8765	102633.8095	69430.446	91620.322	87894.8591666667	73441.5155	83016.3545	65108.802	73855.5573333333
606	C05284	302.188195	11b-Hydroxyandrost-4-ene-3,17-dione	Steroids and steroid derivatives	+	6.84	64993.746	19394.4785	42194.11225	42194.11225	97873.599	195330.398	123071.0255	138758.340833333	77398.52	93096.0535	69750.4445	80081.6726666667
607	C01709	302.07904	Hesperetin	Flavonoids	+	9.36	2315.1265	1413.098	1864.11225	1864.11225	1079.3335	608.1345	1221.321	969.596333333333	1954.605	2645.849	2834.7835	2478.4125
608	C09756	302.07904	Homoeriodictyol	Flavonoids	+	6.83	163492.169	243196.237	203344.203	203344.203	43394.457	739778.325	479117.1895	420763.323833333	218319.937	37354.542	195014.9905	150229.823166667
609	C10719	302.15181	Nordihydroguaiaretic acid	Lignans	+	6.75	232473.207	246088.1645	239280.6858	239280.685766667	557925.97	661019.2425	585228.0515	601391.088	109770.219	88541.88151	106598.759	101636.95317
610		302.07904	Blumeatin	Flavonoids	+	5.19	17922.182	17970.2385	17946.21025	17946.21025	45685.7995	74585.195	25854.065	48708.3531666667	35926.038	34317.0215	19093.527	29778.8621666667
611	C11874	302.22458	Kaurenoic acid	Diterpenoids	+	5.9	27430.489	31394.9025	29412.69575	29412.69575	90073.84699	112271.2005	72412.2485	91585.76533	35379.69	45147.112	33876.956	38134.586
612	C09066	316.203845	Cafestol	Diterpenoids	+	5.47	6644.783	3691.6425	5168.21275	5168.21275	6155.224	6012.329501	6784.303	6317.28550033333	7386.44	14434.553	15235.9045	12352.2991666667
613	C10457	316.09469	Homoferreirin	Flavonoids	+	8.09	9044.195001	8890.367	8967.281001	8967.28100066667	7320.274	10146.2005	9532.5815	8999.68533333333	7323.6555	10780.8515	11119.929	9741.47866666667
614	C04548	167.094629	Synephrine	Alkaloids	+	2.63	8969.684	8450.965	8710.3245	8710.3245	5479.5155	5489.8995	4713.2575	5227.5575	13579.349	11545.3345	2863.0285	9329.23733333333
615	C00099	89.047679	beta-Alanine	Alkaloids	+	0.64	23363.7145	17321.6275	20342.671	20342.671	30898.814	21960.273	21227.6445	24695.5771666667	11400.954	2270.3195	76.85	4582.70783333333
616	C18038	332.235145	7alpha-Hydroxypregnenolone	Prenol lipids	+	7.49	10452.8485	6805.861	8629.35475	8629.35475	4214.9505	4529.666001	10067.973	6270.863167	23370.8465	34469.2785	8666.2825	22168.8025
617	C06196	332.052188	2'-Deoxyinosine-5'-monophosphate	Nucleotide and its derivates	+	1.92	25643.406	20058.837	22851.1215	22851.1215	90107.402	108855.4425	100705.842	99889.5621666667	24707.39	38060.394	50915.503	37894.429
618		332.183505	Betulalbuside A	Monoterpenoids	+	4.2	7742.3855	8581.235	8161.81025	8161.81025	3659.887	4233.337	3188.486	3693.90333333333	5353.9275	16347.518	6404.1525	9368.53266666667
619	C00072	176.03209	Ascorbic acid	Vitamins	+	1.13	27935.583	23277.307	25606.445	25606.445	5786.7805	75148.544	62513.715	47816.3465	19395.4145	19078.9415	15772.845	18082.4003333333
620	C04411	176.068475	3-Isopropylmalate	Fatty Acyls	+	10.79	14351.56301	6055.222501	10203.39276	10203.392757	10251.94	5050.889	3254.000001	6185.609667	14844.47099	8024.664501	4972.4885	9280.54133033333
621	C03081	176.047345	4-Methylumbelliferone	Coumarins	+	7.26	3817.365	3028.662	3423.0135	3423.0135	3131.934	2884.83	760.266	2259.01	7216.869	2097.42	2922.192	4078.827
622	C00819	146.069143	D-Glutamine	Carboxylic acids and derivatives	+	0.66	2870061.867	2348377.526	2609219.697	2609219.69666667	5354708.611	5593648.84	4240017.035	5062791.49533333	1961066.775	2131062.236	1706495.994	1932875.00166667
623	C03114	146.084398	Dimethylbenzimidazole	Benzimidazoles	+	10.56	1102.551	10466.93499	5784.742995	5784.742995	541.6245003	1593	2120.802999	1418.4758331	3445.227002	3766.628502	2694.260503	3302.038669
624	C08369	146.022392	Diallyl disulfide	Miscellaneous	+	0.68	156046.649	107332.754	131689.7015	131689.7015	290494.2185	275867.1005	182745.2815	249702.200166667	120530.262	107972.7085	75653.289	101385.419833333
625	C01575	165.115364	Ephedrine	Benzene and substituted derivatives	+	5.07	98026.205	90035.754	94030.9795	94030.9795	235067.189	190738.474	159013.8625	194939.841833333	113374.877	116360.487	89419.23	106384.864666667
626	C05653	165.042594	Formylanthranilic acid	Benzene and substituted derivatives	+	5.07	313570.449	190565.3695	252067.9093	252067.909266667	404523.204	444347.318	406767.8665	418546.1295	335516.443	232638.3105	221344.0075	263166.253666667
627	C07527	165.078979	Benzocaine	Benzene and substituted derivatives	+	3.05	484657.383	201426.398	343041.8905	343041.8905	658428.98	783951.7334	163214.9115	535198.541633333	298244.594	105564.567	65051.358	156286.839666667
628	C02242	165.06506	7-Methylguanine	Imidazopyrimidines	+	1.56	2031.89	5541.495	3786.6925	3786.6925	8647.853	8508.296	9906.0725	9020.7405	5602.5135	1888.744	1532.9055	3008.05433333333
629	C00971	165.042594	4-Pyridoxolactone	Pyridines and derivatives	+	4.92	8643.342	7230.4285	7936.88525	7936.88525	17027.6075	13687.431	18827.842	16514.2935	17621.9425	14215.4025	7672.658	13170.001
630	C05578	149.047679	5,6-Dihydroxyindole	Indoles and derivatives	+	6.68	9891.552	7604.614	8748.083	8748.083	2724.125	4440.7065	9330.5645	5498.46533333333	5225.5365	5941.981	461.5620001	3876.35983336667
631	C09727	290.07904	Epicatechin	Flavonoids	+	5.08	163892716.8	125995175.5	144943946.2	144943946.166667	233648104.6	272379920.1	245771852.6	250599959.1	153544960.1	161480238.3	150591007.9	155205402.1
632	C00263	119.058244	L-Homoserine	Amino acid and derivatives	+	0.67	163360.612	106654.9495	135007.7808	135007.780766667	240856.8915	264214.58	166919.0255	223996.832333333	75782.085	56744.964	46760.91	59762.653
633	C00956	161.068809	L-Homoglutamic acid	Amino acid and derivatives	+	0.73	51852.993	35753.1875	43803.09025	43803.09025	78528.5205	80731.466	66388.6665	75216.2176666667	25255.955	27456.9495	18761.5515	23824.8186666667
634	C03567	272.068475	2'-Hydroxydihydrodaidzein	Isoflavonoids	+	8.83	15913.9585	13003.3605	14458.6595	14458.6595	6709.2625	3823.09	5784.632999	5438.99516633333	23632.0315	16009.0265	22793.781	20811.613
635	C08637	426.386165	Taraxerol	Triterpenoids	+	12.71	9135.899009	12297.5505	10716.72475	10716.724753	22743.993	7150.212002	18227.8605	16040.6885006667	11439.2755	6930.875997	6260.000004	8210.05050033333
636	C14750	320.162375	alpha-Zearalenol	Macrolides and analogues	+	5.39	2282.652	215644.759	108963.7055	108963.7055	655485.5775	795830.9181	716250.0345	722522.1767	80470.4305	147968.872	71544.5215	99994.608
637	C00761	342.13147	Coniferin	Phenylpropanoids	+	2.79	3404.784	5083.231	4244.0075	4244.0075	3179.756	8478.2025	12083.5465	7913.835	2095.9815	2068.7955	2529.8115	2231.5295
638	C08759	348.15729	Eurycomalactone	Diterpenoids	+	5.79	2907.96	5771.024001	4339.492001	4339.49200066667	2521.3795	5986.485	4689.2005	4399.02166666667	2724.0285	2985.472	2710.2945	2806.59833333333
639	C00267	180.06339	alpha-D-Glucose	Carbohydrates	+	0.76	158669.9295	133276.3885	145973.159	145973.159	223823.659	105793.403	96184.685	141933.915666667	137663.821	89305.564	33496.018	86821.801
640	C01766	154.135765	(-)-Borneol	Monoterpenoids	+	3.42	5446.8435	6197.657	5822.25025	5822.25025	1563.046	6967.538	4607.4535	4379.34583333333	12036.7255	2380.8345	1751.085	5389.54833333333
641	C11393	154.135765	Alpha-Terpineol	Monoterpenoids	+	3.46	5446.8435	6197.657	5822.25025	5822.25025	1563.046	6967.538	4607.4535	4379.34583333333	12036.7255	2380.8345	1751.085	5389.54833333333
642	C09320	274.084125	(+)-Afzelechin	Flavonoids	+	1.09	38037.2745	20462.5035	29249.889	29249.889	33251.9675	32370.2635	32977.836	32866.689	32002.7905	30908.838	27177.8295	30029.8193333333
643	C16979	422.209325	Cedrelone	Triterpenoids	+	11.18	1036.851501	4461.890995	2749.371248	2749.371248	2440.056497	2580.516	76.85	1699.14083233333	4171.332998	76.85	7066.308996	3771.49733133333
644	C01821	448.100565	Luteolin-6-C-glucoside	Flavonoids	+	5.56	18846.942	20010.0615	19428.50175	19428.50175	35581.951	9469.001	49752.3395	31601.0971666667	3933.595	11457.866	2604.115	5998.52533333333
645	C07271	152.120115	1,2-Epoxy-p-menth-8-ene	Oxepanes	+	5.91	13137.6675	2329.6015	7733.6345	7733.6345	12543.677	25903	11356.1535	16600.9435	3968.7225	25689.62	7862.5405	12506.961
646	C12138	464.09548	Delphinidin-3-O-glucoside	Flavonoids	+	6.06	1205793.398	958350.9165	1082072.157	1082072.15716667	3574721.284	4322758.408	2703178.676	3533552.78933333	809491.506	797087.027	1707170.069	1104582.86733333
647	C04092	127.063329	D-1-Piperideine-2-carboxylic acid	Pyridines and derivatives	+	1.74	7535.4235	4928.7825	6232.103	6232.103	15622.4415	8549.58	4006.5	9392.8405	5549.273	3747.732	2094.378	3797.12766666667
648	C10263	283.178359	Amabiline	Alkaloids	+	12.99	17859.17749	22736.61051	20297.894	20297.894	17368.16902	31361.561	18193.71449	22307.8148366667	10880.272	20115.08849	939.1395007	10644.8333302333
649		428.36543	7-Oxo-beta-sitosterol	Steroids and steroid derivatives	+	13.54	2115.881999	2207.777501	2161.82975	2161.82975	2592.091499	4613.014002	3329.021503	3511.375668	2415.297	2771.298	5188.497999	3458.364333
650	C03033	298.06887	Benzoyl glucuronide (Benzoic acid)	Organooxygen compounds	+	12.07	23122.4895	48582.86301	35852.67626	35852.6762566667	31393.99601	76.85	21523.1825	17664.67617	3453.1905	5706.863503	76.85	3078.968001
651	C17956	318.219495	Grandifloric acid	Diterpenoids	+	6.48	39851.567	27113.716	33482.6415	33482.6415	25918.864	30425.8485	50285.0515	35543.2546666667	29612.3005	15512.7385	62366.94349	35830.66083
652		318.219495	ent-17-Hydroxykaur-15-en-19-oic acid	Diterpenoids	+	5.53	14670.4065	3294.915	8982.66075	8982.66075	15530.472	19038.7965	12266.837	15612.0351666667	17133.3065	21942.46	4797.262	14624.3428333333
653	C00376	284.214015	Retinal	Prenol lipids	+	9.07	12959.9685	15281.987	14120.97775	14120.97775	10788.241	8178.945	7583.866001	8850.350667	12610.6205	13014.301	14740.22	13455.0471666667
654	C00407	131.094629	L-Isoleucine	Amino acid and derivatives	+	1.78	102209.286	135865.007	119037.1465	119037.1465	210840.5305	201436.0815	136969.8485	183082.1535	41983.737	29110.412	8567.6025	26553.9171666667
655	C01744	166.062995	Phloretic acid	Phenols	+	2.84	82714.1785	78496.3205	80605.2495	80605.2495	260420.35	267126.126	6112.5795	177886.351833333	80745.2185	5530.6505	8786.354499	31687.407833
656	C12621	164.047345	trans-3-Hydroxycinnamic acid	Phenylpropanoids	+	5.07	730170.341	440098.5655	585134.4533	585134.453266667	1220011.975	1393359.786	779981.1565	1131117.63916667	588145.6645	556751.1711	357556.939	500817.924866667
657	C10384	446.1213	Physcion 1-O-beta-D-glucoside	Anthraquinones	+	6.7	12902.097	13755.7285	13328.91275	13328.91275	14589.888	27886.545	23663.334	22046.589	39332.775	28023.255	34913.3445	34089.7915
658	C00712	282.25588	Oleic acid	Fatty Acyls	+	13.03	660473.7343	575429.5455	617951.6399	617951.6399	738611.0478	799304.6491	694323.8608	744079.852566667	500498.3997	516463.7847	437790.8826	484917.689
