# Supplementary material for: Technology Invention and Mechanism Analysis of Rapid Rooting of Taxus × media Rehder Branches Induced by Agrobacterium rhizogenes
Source: Int J Mol Sci. 2023 Dec 27;25(1):375. doi: 10.3390/ijms25010375 (PMC10779043; doi:10.3390/ijms25010375)
Supplement: Supplementary file 1 [file ijms-25-00375-s001.zip › Table S6. Differentially expressed metabolites in TR vs WR.xlsx]

## Sheet: result
Title: Technology Invention and Mechanism Analysis of Rapid Rooting of Taxus media Branches Induced by Agrobacterium rhizogenes
Authors: Ying Wang, Xiumei Luo, Haotian Su, Ge Guan, Shuang Liu, Maozhi Ren
Supplementary Table S6. Differentially expressed metabolites in TR vs WR.
id	KEGG_ID	EXACT_MASS	NAME_EN	CLASS_EN	ionmode	rt	Mean TR	Mean WR	VIP	P_VALUE	Q_VALUE	FOLD_CHANGE	LOG_FOLDCHANGE
382		592.17921	Linarin	Flavonoids	+	7.65	0.00889883666666667	0.604614347666667	1.42306232402739	0.00042226	0.0098778	0.014718	-6.0863
74	C10682	358.14164	Matairesinol	Lignans	-	9.12	0.00742393974333333	0.320710766666667	1.44227411334791	1.5553e-05	0.0036174	0.023148	-5.4329
135	C10897	191.069477	Carbendazim	Benzimidazoles	+	4.1	0.000458229766666667	0.0123274603333333	1.37450560130536	0.0039524	0.035464	0.037171	-4.7497
508		304.058305	Dihydrorobinetin	Flavonoids	+	5.19	0.0138063583333333	0.329022209666667	1.4376028618271	7.1941e-05	0.0046116	0.041962	-4.5748
232		328.16746	Guaiacin	Lignans	+	7.54	0.000179559316666667	0.00288562866666667	1.44127083053215	3.866e-05	0.0036174	0.062225	-4.0064
230		326.115425	Moracin O	Phenols	+	9.52	0.0136108966666667	0.19431059	1.42507253026453	0.00032816	0.0086864	0.070047	-3.8355
477	C08201	181.086957	Acetylcholine chloride	Alkaloids	+	3.31	0.00094232114	0.0125783896666667	1.30779210834309	0.014105	0.06285	0.074916	-3.7386
439	C08745	538.11113	Lithospermic acid	Phenylpropanoids	+	7.12	0.00270129966666667	0.031389445	1.4415897365001	2.2924e-05	0.0036174	0.086058	-3.5386
26	C08650	256.0736	isoliquiritigenin	flavonoids	+	9.73	0.004184218	0.0468493866666667	1.33158741489937	0.008839	0.049064	0.089312	-3.485
400	C09922	386.10017	Cleomiscosin A	Coumarins	+	5.74	0.00715585333333333	0.0758160426666667	1.38781007523395	0.002366	0.026029	0.094384	-3.4053
588		416.329045	Octadecyl p-coumarate	Phenylpropanoids	+	12.07	0.0572313133333333	0.578728633333333	1.38805150188001	0.0024225	0.026029	0.098891	-3.338
149	C02067	244.069538	Pseudouridine	Nucleotide and its derivates	+	8.73	0.00354520666666667	0.0332973536666667	1.35689775848976	0.006069	0.040563	0.10647	-3.2315
32	C10509	430.1264	Ononin	flavonoids	+	7.3	0.742880533333333	5.70116126666667	1.43846070319227	7.9589e-05	0.0046116	0.1303	-2.9401
403	C10628	252.11503	trans-Hinokiresinol	Lignans	+	10.62	0.00263222333333333	0.0197655963333333	1.24586702310942	0.027831	0.09652	0.13317	-2.9086
634	C03567	272.068475	2-Hydroxydihydrodaidzein	Isoflavonoids	+	8.83	0.00446445566666667	0.0310979823333333	1.37018366928174	0.0042762	0.036375	0.14356	-2.8003
73	C00794	182.07904	D-Sorbitol	Alcohols and polyols	-	0.72	0.0117616756666667	0.079002242	1.21434934270081	0.03809	0.12053	0.14888	-2.7478
148	C10273	244.07356	Oxyresveratrol	Phenols	+	8.74	0.0109189613333333	0.072268088	1.38930416817398	0.0022687	0.025835	0.15109	-2.7265
193	C00673	214.024242	2-Deoxyribose 5-phosphate	Carbohydrates	+	11.13	0.00186510633333333	0.011743109	1.29176360862922	0.016091	0.065998	0.15883	-2.6545
370	C07480	180.064726	Theobromine	Alkaloids	+	3.27	0.001569067	0.009610691	1.29478407106656	0.015451	0.064876	0.16326	-2.6147
601	C09471	288.099775	Asebogenin	Chalcones	+	9.07	0.00296808166666667	0.0180362243333333	1.18643270141125	0.045357	0.13443	0.16456	-2.6033
145	C17425	244.109945	Linderalactone	Sesquiterpenoids	+	8.74	0.00410610033333333	0.0240591943333333	1.39110311821359	0.0021183	0.025604	0.17067	-2.5507
229	C09976	326.15181	Uncinatone	Diterpenoids	+	11.01	0.00363826933333333	0.0211280863333333	1.33904112431378	0.0079677	0.046192	0.1722	-2.5378
341		285.266779	(2S,3R,4E)-2-Amino-4-heptadecene-1,3-diol	Alkaloids	+	11.14	0.006075625	0.0349652366666667	1.20248123536618	0.040553	0.12529	0.17376	-2.5248
227		338.24571	Kirenol	Diterpenoids	+	13.16	0.0114709076666667	0.063248236	1.31611892975824	0.013006	0.059574	0.18136	-2.463
449	C17531	466.11113	Plantagoside	Flavonoids	+	6.85	0.005615392	0.0304952353333333	1.38727428774505	0.0024893	0.026261	0.18414	-2.4411
20		432.105647	Genistin	flavonoids	+	6.62	0.0391245533333333	0.2108984	1.41226775262466	0.00081111	0.013715	0.18551	-2.4304
290	C01226	292.203845	12-OPDA	Fatty Acyls	+	11.4	0.00169870333333333	0.009124342	1.35761743009481	0.0060013	0.040524	0.18617	-2.4253
340	C10748	232.193948	Aloperine	Alkaloids	+	7.22	0.11485958	0.60666581	1.20577831794198	0.039262	0.12364	0.18933	-2.401
106	C09282	286.084125	Oxypeucedanin	Coumarins	+	8.12	0.001811227	0.00952037266666667	1.20177880402149	0.040136	0.12529	0.19025	-2.3941
205	C06561	272.068475	Naringenin chalcone	Flavonoids	+	6.54	0.119703426666667	0.607458153333333	1.31299601124737	0.0118	0.057679	0.19706	-2.3433
243		338.15181	8-Geranyloxypsoralen	Coumarins	+	13.29	0.0422014766666667	0.209946293333333	1.34906888059568	0.0076143	0.04534	0.20101	-2.3147
460	C00607	463.063195	Chondroitin sulfate	Miscellaneous	+	6.18	0.0436466794066667	0.2021576	1.39095394503487	0.002761	0.027822	0.2159	-2.2115
607	C01709	302.07904	Hesperetin	Flavonoids	+	9.36	0.0008008496	0.00370825203333333	1.34649997449091	0.0070263	0.043831	0.21596	-2.2111
270	C04785	310.21441	13(S)-HPOT	Fatty acyls	+	11.47	0.005354886	0.0240860083333333	1.18283710501595	0.047562	0.13891	0.22232	-2.1693
117	C10526	286.12051	(-)-Sativan	Flavonoids	+	7.89	0.05264827	0.236056756666667	1.37852581989994	0.0033394	0.0317	0.22303	-2.1647
416	C08954	750.45543	alpha-Hederin	Triterpenoids	+	8.16	0.00629103266666667	0.0280700016666667	1.28635805614761	0.018024	0.069446	0.22412	-2.1577
30	C01514	286.0477	Luteolin	flavonoids	+	8.03	0.01166735	0.05082019	1.4279510257926	0.00025493	0.0086864	0.22958	-2.1229
324		246.125595	Curcolone	Sesquiterpenoids	+	8.37	0.00251619666666667	0.0108952463333333	1.37264367645798	0.0036559	0.033727	0.23094	-2.1144
323	C09601	246.125595	Xanthatin	Sesquiterpenoids	+	8.39	0.00251619666666667	0.010737669	1.36802906072946	0.004101	0.035632	0.23433	-2.0934
320	C09783	494.178815	Harpagoside	Iridoids	+	6.59	0.006981597	0.0295898713333333	1.38922204505939	0.0024241	0.026029	0.23595	-2.0835
235	C17670	330.073955	Aurantio-obtusin	Anthraquinones	+	10.28	0.00453666433333333	0.01885711	1.3003408048812	0.015688	0.065036	0.24058	-2.0554
373	C05584	198.052825	4-Hydroxy-3-methoxymandelate	Phenols	+	3.27	0.012583564	0.0518300116666667	1.42461039517477	0.00032112	0.0086864	0.24279	-2.0422
623	C03114	146.084398	Dimethylbenzimidazole	Benzimidazoles	+	10.56	0.00117967216666667	0.00485754153333333	1.40085149684011	0.0015391	0.020573	0.24285	-2.0418
204	C10113	270.052825	Norwogonin	Flavonoids	+	11.83	0.00580212880666667	0.02342887	1.23783725161782	0.031031	0.10423	0.24765	-2.0136
242	C04677	338.062753	AICAR	Imidazole ribonucleosides and ribonucleotides	+	13.28	0.021478666	0.086417106	1.32976698101349	0.010613	0.055172	0.24855	-2.0084
223	C13342	150.06808	1-(4-Hydroxyphenyl)propan-1-one	Phenylpropanoids	+	9.9	0.00111932823333333	0.00435288883333333	1.25232025311033	0.026069	0.091909	0.25715	-1.9593
209	C09751	272.068475	Garbanzol	Flavonoids	+	9.9	0.003123803	0.0121299616666667	1.39079763148114	0.0019421	0.024463	0.25753	-1.9572
241		337.188924	3alpha,6beta-Ditigloyloxytropan-7beta-ol	Alkaloids	+	13.21	0.337013233333333	1.2822603	1.33958257115182	0.0091694	0.05005	0.26283	-1.9278
166	C17144	130.135765	3-Octyl alcohol	Miscellaneous	+	1.23	0.00460206233333333	0.017043713	1.27649759477184	0.01984	0.074257	0.27002	-1.8889
529	C10280	559.314519	Auriculine	Alkaloids	+	7.52	0.003897249	0.0142327243333333	1.40962029620501	0.00081664	0.013715	0.27382	-1.8687
4		624.169035	Narcissoside	flavonoids	-	6.38	0.0367481933333333	0.133497606666667	1.3638733871103	0.0045612	0.036434	0.27527	-1.8611
201	C08730	270.052825	Sulfuretin	Flavonoids	+	8.9	0.00511799933333333	0.0183257176666667	1.31455558154409	0.012169	0.058105	0.27928	-1.8402
612	C09066	316.203845	Cafestol	Diterpenoids	+	5.47	0.00518577166666667	0.018558182	1.21382278925442	0.035831	0.11505	0.27943	-1.8394
297	C08387	410.448765	1-Octacosanol	Miscellaneous	+	13.2	0.00944211733333333	0.0337846416666667	1.36883499642988	0.0050089	0.038219	0.27948	-1.8392
10	C06563	270.0528	Genistein	flavonoids	+	8.93	0.00771432166666667	0.0271554003333333	1.30431837997131	0.013217	0.06012	0.28408	-1.8156
572	C17045	284.068475	Physcion	Anthraquinones	+	8.24	0.00168862033333333	0.00585457833333333	1.2129601765912	0.037346	0.11875	0.28843	-1.7937
577	C21822	300.20893	Sugiol	Diterpenoids	+	8.21	0.00435536033333333	0.014740885	1.35171349533583	0.0056391	0.039828	0.29546	-1.759
507		480.10565	2,3-Dehydrosilybin A	Flavonoids	+	5.53	0.013349041	0.0448851413333333	1.23404481488949	0.031895	0.10605	0.2974	-1.7495
6	C17834	608.1741	Spinosin	flavonoids	-	5.79	0.00520216033333333	0.017143912	1.19537423432332	0.041838	0.12746	0.30344	-1.7205
116	C12134	286.04774	2-Hydroxygenistein	Flavonoids	+	7.59	0.00654371533333333	0.0214759553333333	1.25500538947886	0.0255	0.090776	0.3047	-1.7145
257	C08316	338.31848	Erucic acid	Fatty Acyls	+	13.28	0.159405306666667	0.520709346666667	1.31137118300128	0.014455	0.063148	0.30613	-1.7078
255	C12123	254.05791	4,7-Dihydroxyflavone	Flavonoids	+	7.69	0.00846250766666667	0.0266612066666667	1.34504137725132	0.0074481	0.044845	0.31741	-1.6556
199	C05904	270.052825	Pelargonidin	Flavonoids	+	8.98	0.005993086	0.018863567	1.18386201382311	0.043635	0.13111	0.31771	-1.6542
114	C10184	286.04774	Scutellarein	Flavonoids	+	8.12	0.0112503626666667	0.0347575703333333	1.30802590141876	0.013497	0.06055	0.32368	-1.6274
217	C10105	302.042655	Morin	Flavonoids	+	7.71	0.008780447	0.0271191933333333	1.26795003603696	0.020497	0.075425	0.32377	-1.6269
174	C00758	202.02661	Bergaptol	Coumarins	+	7.44	0.0017977095	0.00553965106666667	1.33307248509325	0.0096656	0.052322	0.32452	-1.6236
119	C00380	111.043262	Cytosine	Nucleotide and its derivates	+	0.63	0.04156262	0.1280243	1.29368622422239	0.016122	0.065998	0.32465	-1.6231
378	C08633	464.29266	Pristimerin	Triterpenoids	+	6.85	0.011524289	0.035370699	1.33249322189935	0.0085555	0.047896	0.32581	-1.6179
456		234.16198	beta-Costic acid	Sesquiterpenoids	+	8.9	0.0150739516666667	0.0452601313333333	1.3737488210377	0.0043955	0.036434	0.33305	-1.5862
427	C00187	386.354865	Cholesterol	Steroids and steroid derivatives	+	11.86	0.00541503033333333	0.0161904626666667	1.26148590211529	0.02403	0.08601	0.33446	-1.5801
288		292.07356	Karanjin	Flavonoids	+	11.67	0.009249149	0.0273551643333333	1.35908407798933	0.0054637	0.039549	0.33811	-1.5644
250	C07215	136.05243	2-Methylbenzoic acid	Benzene and substituted derivatives	+	8.83	0.00518852833333333	0.0152457096666667	1.2991977701105	0.014778	0.06368	0.34033	-1.555
513	C17048	534.210115	Phillyrin	Phenylpropanoids	+	7.76	0.0108331693333333	0.0312770826666667	1.27950447483796	0.020163	0.074613	0.34636	-1.5297
578	C09734	300.099775	Farrerol	Flavonoids	+	8.46	0.0331019	0.09512257	1.30516099300465	0.014308	0.063148	0.34799	-1.5229
220	C01851	303.147059	Scopolamine	Alkaloids	+	6.86	0.0255536666666667	0.07226024	1.27902853792055	0.017788	0.06894	0.35363	-1.4997
381	C10815	793.424859	Protoveratrine A	Alkaloids	+	11.73	0.00778710166666667	0.021912323	1.30735621527333	0.014926	0.063898	0.35538	-1.4926
657	C10384	446.1213	Physcion 1-O-beta-D-glucoside	Anthraquinones	+	6.7	0.01809168	0.05074599	1.33817287161643	0.0080105	0.046192	0.35651	-1.488
653	C00376	284.214015	Retinal	Prenol lipids	+	9.07	0.00721560966666667	0.0200904276666667	1.37087037626535	0.0040402	0.035632	0.35916	-1.4773
452	C02253	234.148061	Benzoylagmatine		+	10.56	0.03067742	0.0851614533333333	1.40531651781039	0.0010438	0.015852	0.36023	-1.473
200	C02495	270.052825	2-Hydroxydaidzein	Flavonoids	+	8.79	0.00793287333333333	0.0216988986666667	1.43468808698972	0.00011192	0.004887	0.36559	-1.4517
252	C10208	254.05791	Daidzein	Flavonoids	+	8.5	0.00355403333333333	0.009706652	1.20144594931447	0.040488	0.12529	0.36614	-1.4495
278	C01835	504.16904	Maltotriose	Organooxygen compounds	+	1.23	2.11154666666667	5.67210966666667	1.28234288840081	0.017516	0.068293	0.37227	-1.4256
337	C09289	232.14633	Alantolactone	Sesquiterpenoids	+	11.93	0.0286256066666667	0.07663582	1.23773609147238	0.029525	0.1002	0.37353	-1.4207
286	C09793	580.17921	Narirutin	Flavonoids	+	11.92	0.0707146566666667	0.187302006666667	1.40327965024366	0.0015972	0.020673	0.37754	-1.4053
420		372.15729	Tetrahydrocurcumin	Phenols	+	9.38	0.00231768533333333	0.00605400466666667	1.24379564518397	0.026736	0.093648	0.38284	-1.3852
211	C11635	294.173213	Tombozine	Alkaloids	+	8.31	0.00198170933333333	0.00517022633333333	1.34618837425705	0.0062554	0.040973	0.38329	-1.3835
113	C10510	286.04774	Orobol (5,7,3,4-tetrahydroxyisoflavone)	Flavonoids	+	7.9	0.0106817403333333	0.0274752253333333	1.40931494298712	0.0011041	0.016034	0.38878	-1.363
528	C10237	576.12678	Procyanidin A2	Flavonoids	+	8.38	0.003568574	0.009152204	1.31511293917688	0.012242	0.058105	0.38991	-1.3588
234	C10193	330.073955	Tricin	Flavonoids	+	9.31	0.006218333	0.0159270056666667	1.2223657868671	0.032977	0.10807	0.39043	-1.3569
185	C09861	196.14633	Geranylacetate	Monoterpenoids	+	9.58	0.003345467	0.008263164	1.30505052555705	0.015228	0.064769	0.40487	-1.3045
301	C08580	596.38656	Astaxanthin	Miscellaneous	+	13.56	0.002327264	0.00570644233333333	1.18085122891538	0.048227	0.13975	0.40783	-1.294
576	C00777	300.20893	Retinoic acid	Diterpenoids	+	8.46	0.010425408	0.0254820216666667	1.21142632538498	0.035705	0.11505	0.40913	-1.2894
402		252.078645	4-Methoxyflavone	Flavonoids	+	11.4	0.0224660266666667	0.0548391333333333	1.28035891058757	0.019317	0.073136	0.40967	-1.2875
571		284.10486	Homopterocarpin	Flavonoids	+	9.07	0.01438076	0.0345899	1.23882069279056	0.030449	0.1028	0.41575	-1.2662
440	C05990	462.116215	Isoscoparin	Flavonoids	+	6.23	0.987512	2.37006283333333	1.41544809685539	0.00060375	0.011759	0.41666	-1.2631
316	C10538	446.1213	Trifolirhizin	Flavonoids	+	8.21	0.0141132933333333	0.0337720566666667	1.18229624528189	0.048852	0.13975	0.4179	-1.2588
401	C10561	386.17294	Pinoresinol dimethyl ether	Lignans	+	5.15	0.0274973133333333	0.06526383	1.32536436755594	0.01082	0.055366	0.42133	-1.247
82	C00208	342.116215	D-Maltose	Carbohydrates	-	0.76	6.101653	14.435302	1.32216328183989	0.01107	0.056211	0.42269	-1.2423
438	C10034	538.09	Cupressuflavone	Flavonoids	+	9.67	0.00180086233333333	0.004173747	1.1789321960168	0.048558	0.13975	0.43147	-1.2127
271	C07580	310.19328	Cannabinol	Phenols	+	11.75	0.0148530233333333	0.03423833	1.35030081338144	0.0073358	0.044845	0.43381	-1.2049
443	C12639	464.09548	Quercetin-7-O-beta-D-glucopyranoside	Flavonoids	+	6.1	0.0524938833333333	0.119945883333333	1.29497990148571	0.014558	0.063148	0.43765	-1.1922
444	C16422	464.131865	Hesperetin 7-O-glucoside	Flavonoids	+	6.07	0.0524938833333333	0.119945883333333	1.29497990148571	0.014558	0.063148	0.43765	-1.1922
478	C04227	153.078979	p-Octopamine	Phenols	+	3.84	10.257673	23.2519776666667	1.37884318013684	0.0030601	0.030369	0.44115	-1.1806
406	C16773	238.19328	Bisabolol oxide A	Sesquiterpenoids	+	11.5	0.01320551	0.0295270966666667	1.22638967460487	0.033	0.10807	0.44723	-1.1609
365		442.09	(-)-Catechin gallate(CG)	Flavonoids	+	5.97	0.003802975	0.00845643666666667	1.34212748728008	0.0084335	0.04762	0.44971	-1.1529
602	C01378	288.06339	Fustin	Flavonoids	+	7.59	0.04414967	0.0979991933333333	1.37226307495456	0.0035958	0.033646	0.45051	-1.1504
151	C01772	164.047345	2-Hydroxycinnamic acid	Phenylpropanoids	+	5.44	0.0364488066666667	0.0775734	1.243592392675	0.02918	0.099548	0.46986	-1.0897
480	C04271	256.07356	3,9-Dihydroxypterocarpan	Flavonoids	+	9.65	0.002353179	0.005001362	1.21787849767287	0.036567	0.11684	0.47051	-1.0877
343	C16922	386.24571	Bufalin	Steroids and steroid derivatives	+	5.05	0.02790408	0.0588036133333333	1.29450558299404	0.015358	0.064876	0.47453	-1.0754
15	C02029	221.1277	DL-Dihydrozeatin	phytohormone	+	3.52	0.00764685033333333	0.016025647	1.26953882359357	0.021511	0.078275	0.47716	-1.0674
345	C02140	346.21441	Corticosterone	Steroids and steroid derivatives	+	6.11	0.0916613966666667	0.190341586666667	1.40726000502956	0.0010649	0.015852	0.48156	-1.0542
442	C12141	462.116215	Peonidin-3-glucoside	Flavonoids	+	6.93	0.5541833	1.15072036666667	1.38724946283662	0.0022876	0.025835	0.4816	-1.0541
613	C10457	316.09469	Homoferreirin	Flavonoids	+	8.09	0.00738297866666667	0.014571546	1.19414635931897	0.041361	0.12719	0.50667	-0.98088
256	C09165	254.094295	Chalepensin	Coumarins	+	7.62	0.00545215566666667	0.0107068896666667	1.1703631535069	0.047718	0.13891	0.50922	-0.97364
399	C09307	386.136555	(+)-Pteryxin	Coumarins	+	11.11	0.00436474066666667	0.00838010766666667	1.19397685605663	0.0443	0.13189	0.52085	-0.94107
299	C17501	218.167065	Cyperotundone	Prenol lipids	+	11.13	0.00273078766666667	0.00520526	1.32691887583571	0.010424	0.054622	0.52462	-0.93065
54	C00062	174.111676	L-Arginine	Amino acid and derivatives	+	0.6	1.481889	2.76948666666667	1.37055209642021	0.0041344	0.035632	0.53508	-0.90218
71		516.308705	Oleaside A	Steroids and steroid derivatives	-	0.74	0.128838033333333	0.240069933333333	1.35384493215942	0.0058628	0.040422	0.53667	-0.8979
305	C00089	342.116215	Sucrose	Carbohydrates	+	0.89	2.51087766666667	4.597199	1.21577946187601	0.034237	0.11102	0.54618	-0.87256
219	C10177	302.042655	Robinetin	Flavonoids	+	6.83	0.365739533333333	0.6541924	1.3651921598875	0.0045056	0.036434	0.55907	-0.8389
482	C09794	540.184295	Oleuropein	Iridoids	+	7.4	0.1846767	0.3203489	1.2168503019342	0.033664	0.1097	0.57649	-0.79464
125	C11918	126.031695	Maltol	Flavonoids	+	0.9	0.797748833333333	1.3510675	1.36918976790635	0.0045374	0.036434	0.59046	-0.76009
567	C19632	342.116215	Kojibiose	Fatty Acyls	+	0.72	2.34788933333333	3.97600966666667	1.28839371356168	0.017504	0.068293	0.59051	-0.75996
642	C09320	274.084125	(+)-Afzelechin	Flavonoids	+	1.09	0.0269188866666667	0.0443969633333333	1.43745961793297	9.8569e-05	0.0046116	0.60632	-0.72184
575	C10502	284.068475	(-)-Maackiain	Flavonoids	+	8.48	0.1043606	0.1698425	1.29599357792632	0.017115	0.068111	0.61446	-0.70262
384	C09311	206.05791	Scoparone	Coumarins	+	5.06	0.0940679966666667	0.1527608	1.41972232895771	0.0005634	0.011532	0.61579	-0.6995
605	C06428	302.22458	Eicosapentaenoic acid	Fatty Acyls	+	6.86	0.0720916866666667	0.1090196	1.29963919772389	0.016715	0.067583	0.66127	-0.59668
397	C00755	152.047345	Vanillin	Phenols	+	5.9	1.53348266666667	2.299686	1.33537645965025	0.0080794	0.046192	0.66682	-0.58463
446	C04109	318.03757	Gossypetin	Flavonoids	+	6.46	0.165453933333333	0.244151166666667	1.36685778160191	0.0046361	0.036586	0.67767	-0.56135
387	C14086	206.05791	2-Hydroxy-3-methylbenzalpyruvate	Cinnamic acid and its derivatives	+	5.07	0.323271366666667	0.4565946	1.29175668232132	0.018206	0.069736	0.70801	-0.49817
524	C10087	258.052825	Norlichexanthone	Xanthones	+	4.48	0.0763152533333333	0.107057036666667	1.28218303303274	0.018505	0.070468	0.71285	-0.48834
564		594.137345	Buddlenoid A	Flavonoids	+	8.17	0.00923033266666667	0.0124345296666667	1.19709305497053	0.043586	0.13111	0.74231	-0.4299
225	C13846	283.287514	Octadecanamide	Fatty Acyls	+	13.02	0.03708093	0.0479782266666667	1.28659927931373	0.017014	0.068111	0.77287	-0.3717
383		206.141913	Agrocybenine	Alkaloids	+	5.03	0.371017133333333	0.4534077	1.17966372624281	0.04886	0.13975	0.81829	-0.28932
535	C10863	291.147059	Phyllalbine	Alkaloids	+	5.07	10.6586433333333	12.9899366666667	1.38862392938217	0.0020464	0.02529	0.82053	-0.28537
658	C00712	282.25588	Oleic acid	Fatty Acyls	+	13.03	0.6080173	0.716736566666667	1.39681355608044	0.0014965	0.020421	0.84831	-0.23733
600	C08724	288.06339	Okanin	Chalcones	+	5.99	1.866738	1.457045	1.29585025007326	0.016247	0.066099	1.2812	0.35747
139	C16700	138.031695	3,4-Dihydroxybenzaldehyde	Phenols	+	4.29	1.18886273333333	0.9073992	1.24148040398063	0.028365	0.097783	1.3102	0.38977
622	C00819	146.069143	D-Glutamine	Carboxylic acids and derivatives	+	0.66	4.12434533333333	2.853582	1.36575820660093	0.0052085	0.038332	1.4453	0.53139
63	C00047	146.105528	L-Lysine	Amino acid and derivatives	+	0.64	4.12434533333333	2.853582	1.36575820660093	0.0052085	0.038332	1.4453	0.53139
183	C01717	189.042594	Kynurenic acid	Alkaloids	+	4.36	0.0147766323333333	0.00955948533333333	1.25455475376539	0.026099	0.091909	1.5458	0.62831
37	C12249	448.1006	Astragalin	flavonoids	+	6.52	0.535655466666667	0.3371208	1.33491801943038	0.010099	0.053738	1.5889	0.66804
77	C00092	260.029722	D-Glucose 6-phosphate	Carbohydrates	-	0.65	0.400998766666667	0.246411833333333	1.31791142201859	0.01235	0.058195	1.6274	0.70253
168	C00147	135.054495	Adenine	Nucleotide and its derivates	+	2.6	0.711944566666667	0.421632933333333	1.35588206978727	0.0068295	0.04343	1.6885	0.75578
48	C05625	610.1534	Rutin	flavonoids	+	5.85	4.31143133333333	2.55231633333333	1.31880819568958	0.012799	0.059038	1.6892	0.75636
167	C02505	135.068414	2-Phenylacetamide	Benzene and substituted derivatives	+	2.52	0.711944566666667	0.4169798	1.36033574767452	0.0061972	0.040973	1.7074	0.77179
122	C00431	117.078979	5-Aminovaleric acid	Amino acid and derivatives	+	1.11	1.0066996	0.582736566666667	1.38263756545636	0.0031889	0.030924	1.7275	0.78872
398	C04043	152.047345	3,4-Dihydroxyphenylacetaldehyde	Benzene and substituted derivatives	+	4.05	0.00221360033333333	0.00126511633333333	1.31127127484916	0.01222	0.058105	1.7497	0.80712
58	C00327	175.095692	L-Citruline	Amino acid and derivatives	+	0.66	0.2459858	0.140565766666667	1.23317243634624	0.032114	0.10623	1.75	0.80733
633	C00956	161.068809	L-Homoglutamic acid	Amino acid and derivatives	+	0.73	0.06136391	0.0349953166666667	1.41549582540487	0.00077758	0.013715	1.7535	0.81023
57	C00049	133.037509	L-Aspartic acid	Amino acid and derivatives	+	0.63	0.277658	0.143223833333333	1.34591506157433	0.0064517	0.04184	1.9386	0.95504
60	C00135	155.069477	L-Histidine	Amino acid and derivatives	+	0.59	0.222745533333333	0.114075966666667	1.38253307519334	0.0027566	0.027822	1.9526	0.9654
164	C02656	160.07356	Pimelic acid	Fatty Acyls	+	0.55	1.06767676666667	0.5185307	1.43711016189645	9.6391e-05	0.0046116	2.059	1.042
51	C00188	119.058244	L-Threonine	Amino acid and derivatives	+	0.64	0.18192738	0.08782946	1.32207175584893	0.011556	0.056914	2.0714	1.0506
632	C00263	119.058244	L-Homoserine	Amino acid and derivatives	+	0.67	0.18192738	0.08782946	1.32207175584893	0.011556	0.056914	2.0714	1.0506
462	C02727	188.116093	N6-Acetyl-L-lysine	Amino acid and derivatives	+	0.81	0.0963911266666667	0.0462927866666667	1.36788970700486	0.0045458	0.036434	2.0822	1.0581
360	C10470	194.05791	3-Hydroxy-4-methoxycinnamic acid	Phenylpropanoids	+	4.87	0.0631691966666667	0.02953984	1.43821781154723	9.2602e-05	0.0046116	2.1384	1.0966
61	C01157	131.058244	trans-4-Hydroxy-L-proline	Amino acid and derivatives	+	0.65	0.0679185266666667	0.0314866133333333	1.32191044249066	0.010772	0.055366	2.1571	1.1091
146	C00299	244.069538	Uridine	Nucleotide and its derivates	+	2.47	0.0132756606666667	0.00614895933333333	1.18253086313752	0.046257	0.13648	2.159	1.1104
123	C00872	119.021859	Aminomalonic acid	Organic acids	+	0.65	0.03092208	0.0140341366666667	1.2102864843622	0.040424	0.12529	2.2033	1.1397
502	C00387	283.09167	Guanosine	Nucleotide and its derivates	+	2.65	0.611255766666667	0.2757469	1.357984411186	0.0056549	0.039828	2.2167	1.1484
359	C01494	194.05791	Ferulic acid	Phenylpropanoids	+	4.86	0.14594852	0.06530847	1.34555884805643	0.0077975	0.046012	2.2348	1.1601
570	C01762	284.075686	Xanthosine	Nucleotide and its derivates	+	2.61	0.032321864	0.014141204	1.31426979835911	0.013414	0.06055	2.2857	1.1926
124	C00763	115.063329	D-Proline	Carboxylic acids and derivatives	+	0.76	81.7076366666667	35.3832266666667	1.42638191773108	0.00030524	0.0086864	2.3092	1.2074
52	C00148	115.063329	Proline	Amino acid and derivatives	+	0.73	81.7076366666667	35.3832266666667	1.42638191773108	0.00030524	0.0086864	2.3092	1.2074
266	C00180	122.03678	Benzoic acid	Phenols	+	5.95	0.0835868	0.0361743166666667	1.24699665756127	0.028592	0.098052	2.3107	1.2083
432	C03975	179.044325	Isoxanthopterin	Pteridines and derivatives	+	3.26	0.0224983643333333	0.009729183	1.28326468315408	0.01968	0.074084	2.3125	1.2094
597	C00535	288.20893	Testosterone	Steroids	+	5.98	0.13091507	0.05482755	1.34400126414121	0.0074627	0.044845	2.3878	1.2557
296	C06358	162.06808	Methyl cinnamate	Phenylpropanoids	+	4.9	1.10792093333333	0.461508	1.19977249131583	0.043861	0.13118	2.4007	1.2634
25	C16431	351.1543	trans-Zeatin-riboside	phytohormone	+	4.31	0.0192847403333333	0.007815558	1.26680948490719	0.023791	0.085623	2.4675	1.303
214	C00170	297.089561	5-S-Methyl-5-thioadenosine	Nucleotide and its derivates	+	3.99	3.83639266666667	1.53906366666667	1.3968005922181	0.0021553	0.025604	2.4927	1.3177
506	C16752	480.19955	Acevaltrate	Iridoids	+	5.56	0.0564650966666667	0.02205511	1.32966040112332	0.010154	0.053738	2.5602	1.3562
172	C01250	173.068809	N-Acetyl-L-glutamate 5-semialdehyde	Carboxylic acids and derivatives	+	1.51	0.006559079	0.002538522	1.29704706745415	0.017459	0.068293	2.5838	1.3695
391	C08533	307.069204	Narciclasine	Alkaloids	+	4.12	0.0021991384	0.0008406543	1.32748579846853	0.011531	0.056914	2.616	1.3874
78	C00446	260.029722	Galactose 1-phosphate	Organooxygen compounds	-	0.65	0.5013691	0.191115	1.31891401927729	0.012466	0.058321	2.6234	1.3914
9	C00334	103.0633	4-Aminobutyric acid	amino acids	+	0.66	0.154390133333333	0.05730974	1.41286955001529	0.00072454	0.013183	2.694	1.4297
126	C04592	126.06808	Toluene-cis-dihydrodiol	polyol	+	1.78	0.0241571503333333	0.008862885	1.31733553371937	0.01263	0.058673	2.7257	1.4466
425		564.12678	Theaflavin	Flavonoids	+	7.61	1.54620833333333	0.566128	1.44092514162059	3.5581e-05	0.0036174	2.7312	1.4495
62	C00041	89.047679	L-Alanine	Amino acid and derivatives	+	0.64	0.253602036666667	0.0916697833333333	1.17976244170166	0.047581	0.13891	2.7665	1.468
170	C07565	135.068414	N-Acetylarylamine	Benzene and substituted derivatives	+	1.93	0.190781406666667	0.06844489	1.41496653495426	0.00094889	0.015159	2.7874	1.4789
221	C00020	347.063087	Adenosine 5-monophosphate	Nucleotide and its derivates	+	1.38	0.910273866666667	0.317495366666667	1.39302279047922	0.002189	0.025604	2.867	1.5196
284	C10307	580.17921	Cascaroside A	Anthraquinones	+	5.05	0.07182913	0.0232392533333333	1.42413704491225	0.00033154	0.0086864	3.0909	1.628
285		580.17921	Glucoliquiritin	Flavonoids	+	5.07	0.07182913	0.0232392533333333	1.42413704491225	0.00033154	0.0086864	3.0909	1.628
162	C00009	97.976897	Phosphoric acid	Organic acids	+	0.65	1.96488183333333	0.635198966666667	1.38820644100389	0.0025259	0.026261	3.0933	1.6292
467	C04779	281.112405	2-O-Methyladenosine	Purine nucleosides	+	2.72	0.125335613333333	0.0402405733333333	1.35247747741545	0.0066806	0.0429	3.1147	1.6391
609	C10719	302.15181	Nordihydroguaiaretic acid	Lignans	+	6.75	0.492030833333333	0.1514571	1.42916566705039	0.00029978	0.0086864	3.2486	1.6998
159	C01879	129.042594	5-oxoproline	Amino acid and derivatives	+	0.56	0.296233013333333	0.0911091133333333	1.37621419294912	0.0037654	0.034254	3.2514	1.7011
553	C00294	268.080771	Inosine	Nucleotide and its derivates	+	2.6	0.679553312766667	0.207127148333333	1.27608318912514	0.02081	0.076147	3.2809	1.7141
585	C02378	131.094629	6-Aminocaproic acid	Fatty Acyls	+	1.84	0.515843966666667	0.154990733333333	1.43461512145607	0.00012787	0.0052347	3.3282	1.7348
55	C00152	132.053493	L-Asparagine	Amino acid and derivatives	+	0.64	0.106685623333333	0.0317574966666667	1.24639470918447	0.027851	0.09652	3.3594	1.7482
38		448.100561	Cynaroside	flavonoids	+	6.1	0.7407351	0.2200696	1.38357457478321	0.0032104	0.030924	3.3659	1.751
498	C11129	147.032029	1H-Indole-2,3-dione	Indoles and derivatives	+	2.79	0.299294923333333	0.0860839066666667	1.34935252564344	0.0073545	0.044845	3.4768	1.7978
436	C00261	106.041865	Benzaldehyde	Phenols	+	2.82	0.16088429	0.0442212433333333	1.32988828794351	0.010173	0.053738	3.6382	1.8632
539	C03626	202.142976	NG,NG-Dimethylarginine dihydrochloride	Carboxylic acids and derivatives	+	0.74	0.276153106666667	0.07554576	1.43859591641039	9.6351e-05	0.0046116	3.6554	1.87
476	C01536	181.073894	DL-Tyrosine	Alkaloids	+	1.9	0.484542396666667	0.129469266666667	1.19110650171722	0.042295	0.12826	3.7425	1.904
584	C16434	131.094629	Isoleucine	Amino acid and derivatives	+	1.8	0.148723	0.0380814533333333	1.36232172275585	0.0050765	0.038219	3.9054	1.9655
654	C00407	131.094629	L-Isoleucine	Amino acid and derivatives	+	1.78	0.148723	0.0380814533333333	1.36232172275585	0.0050765	0.038219	3.9054	1.9655
636	C14750	320.162375	alpha-Zearalenol	Macrolides and analogues	+	5.39	0.5914737	0.146148233333333	1.41851935576938	0.00068265	0.012775	4.0471	2.0169
273		310.21441	Sterebin A	Diterpenoids	+	11.75	0.217330223333333	0.0524199866666667	1.42460763719387	0.00041748	0.0098778	4.1459	2.0517
327	C00310	150.052825	D-Xylulose	Carbohydrates	+	1.76	0.0288337603333333	0.00674781733333333	1.34538488229414	0.0081101	0.046192	4.2731	2.0953
357	C09962	193.073894	Gentioflavin	Alkaloids	+	4.93	0.0302688433333333	0.006836301	1.36964736513741	0.004954	0.038219	4.4277	2.1465
22	C01152	169.0851	3-Methy-L-histidine	amino acids	+	0.61	0.063757891	0.0134724496666667	1.42312546251259	0.00036797	0.00927	4.7325	2.2426
194	C00214	242.090273	Thymidine	Nucleotide and its derivates	+	3.04	0.0246673543333333	0.00517239766666667	1.35901391761075	0.0059982	0.040524	4.769	2.2537
233	C02353	329.052522	Adenosine 2,3-cyclic phosphate	Purine nucleotides	+	1.86	0.03398564	0.00712336066666667	1.28187529373506	0.020123	0.074613	4.771	2.2543
182	C05548	187.084459	2-Keto-6-acetamidocaproate	Keto acids and derivatives	+	1.48	0.024235548	0.005015397	1.41038528819129	0.0010482	0.015852	4.8322	2.2727
186	C08491	210.125595	Jasmonic acid	Fatty Acyls	+	6.73	0.0490737516666667	0.0101291626666667	1.40689531761467	0.0012275	0.017106	4.8448	2.2764
274		458.170748	Valechlorine	Iridoids	+	0.63	0.063011155	0.0124384426666667	1.41580464257098	0.00061041	0.011759	5.0658	2.3408
95	C03519	207.089544	N-Acetyl-L-phenylalanine	Amino acid and derivatives	-	5.88	0.0252648749666667	0.0049450874	1.28803281631212	0.017158	0.068111	5.1091	2.3531
579	C00378	264.104482	Thiamine	Vitamins	+	0.7	0.0500244182333333	0.0093755858	1.40233908541868	0.0016096	0.020673	5.3356	2.4157
405	C11264	238.062995	7-Hydroxyflavone	Flavonoids	+	0.56	0.0209887986666667	0.00387445866666667	1.36317088510901	0.0058152	0.040422	5.4172	2.4376
472	C03267	260.029722	Beta-D-Fructose 2-phosphate	Organooxygen compounds	+	0.75	0.950221633333333	0.174745466666667	1.44055472334203	2.5391e-05	0.0036174	5.4377	2.443
583	C01933	131.094629	L-Norleucine	Amino acid and derivatives	+	1.81	0.209553836666667	0.0380814533333333	1.25710426935262	0.023409	0.08471	5.5028	2.4602
262	C00942	345.047437	Guanosine 3,5-cyclic monophosphate	Nucleotide and its derivates	+	2.26	0.023884117	0.00395441066666667	1.41227411600731	0.00090011	0.014739	6.0399	2.5945
319	C01674	424.169313	N,N-diacetylchitobiose	Organooxygen compounds	+	0.77	0.005191138	0.000849624333333333	1.22825548765161	0.031221	0.10433	6.1099	2.6112
481	C03033	540.257065	Tetrahydroaldosterone-3-glucuronide	Organooxygen compounds	+	0.72	0.216513033333333	0.0352868333333333	1.41816662045005	0.00050355	0.011235	6.1358	2.6173
350	C12128	274.084125	(-)-Epiafzelechin	Flavonoids	+	5.66	3.2267082	0.512042733333333	1.42391967246238	0.00051457	0.011235	6.3016	2.6557
173	C17366	173.068809	(2S,5S)-trans-Carboxymethylproline		+	1.38	0.040507729	0.00641316333333333	1.43637193900245	9.0428e-05	0.0046116	6.3163	2.6591
499		159.125929	Pregabalin	Miscellaneous	+	0.69	0.128849447	0.0176219096666667	1.35284025054829	0.0069304	0.043648	7.3119	2.8702
3	C10108	464.0955	Myricitrin	flavonoids	-	5.97	0.0822891549666667	0.0109050851	1.36384364055886	0.0054946	0.039549	7.5459	2.9157
280	C00417	174.01644	cis-Aconitic acid	Organic acids and derivatives	+	1.46	1.01016522	0.12893463	1.31919659300795	0.012144	0.058105	7.8347	2.9699
358	C07313	265.091002	Streptozotocin	Organooxygen compounds	+	0.72	0.0980473603333333	0.012311277	1.43289787891483	0.00015806	0.0060898	7.964	2.9935
93	C00257	196.058305	Gluconic acid	Carbohydrates	-	0.69	0.291736953333333	0.0328798666666667	1.32067162702673	0.011199	0.056424	8.8728	3.1494
181	C00588	183.066046	Phosphorylcholine	Cholines	+	0.67	1.4824251	0.164027166666667	1.44451964490061	1.3577e-05	0.0036174	9.0377	3.176
308	C00670	257.102826	Glycerophosphocholine	Cholines	+	1.47	0.0297141403333333	0.003203353	1.41260961073081	0.001126	0.016034	9.2759	3.2135
94	C00105	324.03587	Uridine 5-monophosphate	Nucleotide and its derivates	-	1.39	0.0182194768666667	0.00174382386666667	1.30184055916741	0.015581	0.065003	10.448	3.3852
18	C00082	181.0739	L-Tyrosine	amino acids	+	1.93	0.636603403333333	0.06051664	1.33933304514411	0.0089696	0.04937	10.519	3.395
503	C08680	343.251129	Denudatine	Alkaloids	+	1.59	0.29026121	0.0270500266666667	1.20592132911226	0.041664	0.12746	10.731	3.4236
27	C09827	256.0736	Pinocembrin	flavonoids	+	11.09	0.0320664347666667	0.00196136263333333	1.42176606185063	0.00054173	0.011446	16.349	4.0311
31	C12136	306.074	(-)-Epigallocatechin	flavonoids	+	4.12	9.59219704	0.0194797633333333	1.44312053593741	2.8462e-05	0.0036174	492.42	8.9437
