# Supplementary material for: Technology Invention and Mechanism Analysis of Rapid Rooting of Taxus × media Rehder Branches Induced by Agrobacterium rhizogenes
Source: Int J Mol Sci. 2023 Dec 27;25(1):375. doi: 10.3390/ijms25010375 (PMC10779043; doi:10.3390/ijms25010375)
Supplement: Supplementary file 1 [file ijms-25-00375-s001.zip › Table S7. KEGG pathways correlated with DEGs and DEMs.xlsx]

## Sheet: data
Title: Technology Invention and Mechanism Analysis of Rapid Rooting of Taxus media Branches Induced by Agrobacterium rhizogenes
Authors: Ying Wang, Xiumei Luo, Haotian Su, Ge Guan, Shuang Liu, Maozhi Ren
Supplementary Table S7. KEGG pathways correlated with DEGs and DEMs.
KO_id	kegg_level_term1	kegg_level_term2	KEGGID	Gene	Metabolites	Website_link	cpd_hits	Input number
ko01040	Metabolism	Lipid metabolism	Biosynthesis of unsaturated fatty acids	10	3	https://www.genome.jp/dbget-bin/www_bget?map01040	cpd:C00712 Oleic acid;cpd:C08316 Erucic acid;cpd:C06428 Eicosapentaenoic acid;	Novel01153|gene-KI387_037442|gene-KI387_037443|gene-KI387_004708|Novel02294|gene-KI387_003587|gene-KI387_022602|gene-KI387_026868|gene-KI387_036104|gene-KI387_039315
ko00061	Metabolism	Lipid metabolism	Fatty acid biosynthesis	12	1	https://www.genome.jp/dbget-bin/www_bget?map00061	cpd:C00712 Oleic acid;	gene-KI387_033825|gene-KI387_037610|gene-KI387_042547|gene-KI387_021982|gene-KI387_023814|gene-KI387_033745|gene-KI387_019345|gene-KI387_036104|gene-KI387_022893|gene-KI387_017760|gene-KI387_025021|Novel04667
ko00450	Metabolism	Metabolism of other amino acids	Selenocompound metabolism	9	1	https://www.genome.jp/dbget-bin/www_bget?map00450	cpd:C00041 L-Alanine;	gene-KI387_024703|gene-KI387_012851|gene-KI387_024913|Novel02311|Novel07017|gene-KI387_017695|gene-KI387_031012|Novel03215|gene-KI387_001477
ko00908	Metabolism	Metabolism of terpenoids and polyketides	Zeatin biosynthesis	8	5	https://www.genome.jp/dbget-bin/www_bget?map00908	cpd:C00020 Adenosine 5-monophosphate;cpd:C02029 DL-Dihydrozeatin;cpd:C00170 5-S-Methyl-5-thioadenosine;cpd:C00147 Adenine;cpd:C16431 trans-Zeatin-riboside;	gene-KI387_015713|gene-KI387_031287|gene-KI387_027386|gene-KI387_018063|gene-KI387_000471|gene-KI387_039318|gene-KI387_027549|gene-KI387_023671
ko00920	Metabolism	Energy metabolism	Sulfur metabolism	7	1	https://www.genome.jp/dbget-bin/www_bget?map00920	cpd:C00263 L-Homoserine;	gene-KI387_000264|gene-KI387_022302|gene-KI387_005875|gene-KI387_011653|gene-KI387_003201|gene-KI387_023865|gene-KI387_001477
ko00250	Metabolism	Amino acid metabolism	Alanine, aspartate and glutamate metabolism	19	4	https://www.genome.jp/dbget-bin/www_bget?map00250	cpd:C00041 L-Alanine;cpd:C00049 L-Aspartic acid;cpd:C00152 L-Asparagine;cpd:C00334 4-Aminobutyric acid;	gene-KI387_037286|gene-KI387_028625|gene-KI387_015469|gene-KI387_023397|gene-KI387_004986|gene-KI387_016009|gene-KI387_015468|gene-KI387_012059|gene-KI387_024089|gene-KI387_025751|gene-KI387_014293|gene-KI387_011758|gene-KI387_025209|gene-KI387_014575|Novel06724|gene-KI387_013763|gene-KI387_006775|gene-KI387_002698|gene-KI387_005181
ko01200	Metabolism	Global and overview maps	Carbon metabolism	70	3	https://www.genome.jp/dbget-bin/www_bget?map01200	cpd:C00257 Gluconic acid;cpd:C00049 L-Aspartic acid;cpd:C00041 L-Alanine;	Novel06724|gene-KI387_035736|gene-KI387_037442|gene-KI387_037443|gene-KI387_030823|gene-KI387_023286|gene-KI387_028053|gene-KI387_011849|gene-KI387_035754|gene-KI387_036098|gene-KI387_025746|Novel06148|Novel06147|gene-KI387_022683|gene-KI387_003201|gene-KI387_002665|gene-KI387_039315|gene-KI387_016009|gene-KI387_004306|gene-KI387_001376|gene-KI387_001375|gene-KI387_006517|gene-KI387_027202|gene-K…
ko04075	Environmental Information Processing	Signal transduction	Plant hormone signal transduction	79	2	https://www.genome.jp/dbget-bin/www_bget?map04075	cpd:C02029 DL-Dihydrozeatin;cpd:C08491 Jasmonic acid;	gene-KI387_013595|Novel07195|Novel02948|gene-KI387_014000|gene-KI387_005154|gene-KI387_024078|gene-KI387_000835|gene-KI387_030580|gene-KI387_012658|Novel04360|gene-KI387_026509|gene-KI387_035734|gene-KI387_035556|gene-KI387_029388|gene-KI387_041135|gene-KI387_023875|gene-KI387_020713|gene-KI387_003498|gene-KI387_008718|gene-KI387_011648|gene-KI387_011649|Novel02886|gene-KI387_009389|Novel06166|ge…
ko00261	Metabolism	Biosynthesis of other secondary metabolites	Monobactam biosynthesis	1	4	https://www.genome.jp/dbget-bin/www_bget?map00261	cpd:C00082 L-Tyrosine;cpd:C00062 L-Arginine;cpd:C00188 L-Threonine;cpd:C00049 L-Aspartic acid;	gene-KI387_024281
ko00660	Metabolism	Carbohydrate metabolism	C5-Branched dibasic acid metabolism	2	1	https://www.genome.jp/dbget-bin/www_bget?map00660	cpd:C00417 cis-Aconitic acid;	gene-KI387_013833|Novel06680
ko00730	Metabolism	Metabolism of cofactors and vitamins	Thiamine metabolism	2	2	https://www.genome.jp/dbget-bin/www_bget?map00730	cpd:C00082 L-Tyrosine;cpd:C00378 Thiamine;	gene-KI387_034266|gene-KI387_007535
ko00350	Metabolism	Amino acid metabolism	Tyrosine metabolism	12	3	https://www.genome.jp/dbget-bin/www_bget?map00350	cpd:C00082 L-Tyrosine;cpd:C04043 3,4-Dihydroxyphenylacetaldehyde;cpd:C05584 4-Hydroxy-3-methoxymandelate;	gene-KI387_028625|gene-KI387_023397|gene-KI387_031168|gene-KI387_039530|gene-KI387_026287|gene-KI387_015588|gene-KI387_008397|Novel00128|gene-KI387_018192|gene-KI387_029182|gene-KI387_002698|gene-KI387_008394
ko00240	Metabolism	Nucleotide metabolism	Pyrimidine metabolism	14	5	https://www.genome.jp/dbget-bin/www_bget?map00240	cpd:C00105 Uridine 5-monophosphate;cpd:C00299 Uridine;cpd:C00214 Thymidine;cpd:C00380 Cytosine;cpd:C02067 Pseudouridine;	gene-KI387_009470|gene-KI387_021633|gene-KI387_008622|Novel01298|gene-KI387_026306|gene-KI387_018890|gene-KI387_009959|gene-KI387_026009|gene-KI387_025073|gene-KI387_008361|gene-KI387_035356|gene-KI387_028236|gene-KI387_028237|gene-KI387_026858
ko00650	Metabolism	Carbohydrate metabolism	Butanoate metabolism	6	1	https://www.genome.jp/dbget-bin/www_bget?map00650	cpd:C00334 4-Aminobutyric acid;	Novel06680|gene-KI387_024089|gene-KI387_014575|gene-KI387_022873|gene-KI387_035736|gene-KI387_025209
ko01210	Metabolism	Global and overview maps	2-Oxocarboxylic acid metabolism	15	7	https://www.genome.jp/dbget-bin/www_bget?map01210	cpd:C00049 L-Aspartic acid;cpd:C00956 L-Homoglutamic acid;cpd:C00047 L-Lysine;cpd:C00407 L-Isoleucine;cpd:C00417 cis-Aconitic acid;cpd:C01250 N-Acetyl-L-glutamate 5-semialdehyde;cpd:C00082 L-Tyrosine;	gene-KI387_018946|gene-KI387_013833|gene-KI387_018944|Novel06680|gene-KI387_023397|gene-KI387_028625|gene-KI387_035370|gene-KI387_009275|Novel03458|gene-KI387_025672|gene-KI387_006311|gene-KI387_002431|gene-KI387_024533|gene-KI387_002698|gene-KI387_024281
ko00760	Metabolism	Metabolism of cofactors and vitamins	Nicotinate and nicotinamide metabolism	5	2	https://www.genome.jp/dbget-bin/www_bget?map00760	cpd:C00049 L-Aspartic acid;cpd:C00334 4-Aminobutyric acid;	gene-KI387_030398|gene-KI387_021637|gene-KI387_018890|gene-KI387_035407|gene-KI387_014293
ko00030	Metabolism	Carbohydrate metabolism	Pentose phosphate pathway	19	2	https://www.genome.jp/dbget-bin/www_bget?map00030	cpd:C00257 Gluconic acid;cpd:C00673 2-Deoxyribose 5-phosphate;	gene-KI387_014874|gene-KI387_036552|gene-KI387_027838|gene-KI387_016264|Novel05342|gene-KI387_019920|gene-KI387_030823|gene-KI387_026303|gene-KI387_011849|gene-KI387_004306|gene-KI387_036098|gene-KI387_014381|gene-KI387_014382|gene-KI387_014383|gene-KI387_022767|Novel05007|gene-KI387_006706|gene-KI387_011850|gene-KI387_022290
ko00360	Metabolism	Amino acid metabolism	Phenylalanine metabolism	11	6	https://www.genome.jp/dbget-bin/www_bget?map00360	cpd:C01772 2-Hydroxycinnamic acid;cpd:C03519 N-Acetyl-L-phenylalanine;cpd:C00180 Benzoic acid;cpd:C02505 2-Phenylacetamide;cpd:C00755 Vanillin;cpd:C00082 L-Tyrosine;	gene-KI387_028625|gene-KI387_022303|gene-KI387_023397|gene-KI387_022307|gene-KI387_022309|gene-KI387_039530|gene-KI387_026287|gene-KI387_010842|gene-KI387_029182|gene-KI387_002698|gene-KI387_032531
ko00710	Metabolism	Energy metabolism	Carbon fixation in photosynthetic organisms	20	2	https://www.genome.jp/dbget-bin/www_bget?map00710	cpd:C00049 L-Aspartic acid;cpd:C00041 L-Alanine;	gene-KI387_004306|gene-KI387_027838|gene-KI387_005638|gene-KI387_017946|gene-KI387_021656|gene-KI387_031072|gene-KI387_031445|gene-KI387_030823|gene-KI387_023397|gene-KI387_026303|gene-KI387_015818|gene-KI387_005834|gene-KI387_036183|gene-KI387_027202|gene-KI387_025746|gene-KI387_038701|gene-KI387_022767|gene-KI387_031446|Novel05007|Novel01235
ko00480	Metabolism	Metabolism of other amino acids	Glutathione metabolism	65	1	https://www.genome.jp/dbget-bin/www_bget?map00480	cpd:C01879 5-oxoproline;	gene-KI387_032435|Novel06409|gene-KI387_004730|Novel06541|gene-KI387_015213|gene-KI387_034321|gene-KI387_006893|Novel02720|gene-KI387_036098|Novel06586|gene-KI387_036846|gene-KI387_034353|Novel06584|gene-KI387_034355|Novel06592|gene-KI387_024910|gene-KI387_034356|gene-KI387_034360|gene-KI387_021720|gene-KI387_032437|gene-KI387_021728|gene-KI387_033865|gene-KI387_021729|Novel02259|gene-KI387_02600…
ko00100	Metabolism	Lipid metabolism	Steroid biosynthesis	14	1	https://www.genome.jp/dbget-bin/www_bget?map00100	cpd:C00187 Cholesterol;	gene-KI387_018338|gene-KI387_032107|gene-KI387_035162|gene-KI387_014542|gene-KI387_035163|gene-KI387_011618|gene-KI387_034877|gene-KI387_029411|gene-KI387_011617|Novel02639|gene-KI387_040360|gene-KI387_023184|gene-KI387_022917|Novel02572
ko00260	Metabolism	Amino acid metabolism	Glycine, serine and threonine metabolism	11	3	https://www.genome.jp/dbget-bin/www_bget?map00260	cpd:C00049 L-Aspartic acid;cpd:C00188 L-Threonine;cpd:C00263 L-Homoserine;	gene-KI387_022306|gene-KI387_026287|gene-KI387_024281|gene-KI387_016327|gene-KI387_009360|Novel02112|gene-KI387_031955|Novel06724|Novel03793|gene-KI387_023314|gene-KI387_031096
ko00592	Metabolism	Lipid metabolism	alpha-Linolenic acid metabolism	33	3	https://www.genome.jp/dbget-bin/www_bget?map00592	cpd:C08491 Jasmonic acid;cpd:C01226 12-OPDA;cpd:C04785 13(S)-HPOT;	gene-KI387_002290|gene-KI387_002293|gene-KI387_012138|gene-KI387_037442|gene-KI387_034877|gene-KI387_012135|gene-KI387_007868|gene-KI387_012137|gene-KI387_002119|gene-KI387_012131|gene-KI387_012132|gene-KI387_013340|gene-KI387_029081|gene-KI387_019499|gene-KI387_039315|gene-KI387_007867|gene-KI387_031168|gene-KI387_037443|gene-KI387_026868|gene-KI387_021407|Novel02237|gene-KI387_012134|gene-KI387…
ko00941	Metabolism	Biosynthesis of other secondary metabolites	Flavonoid biosynthesis	25	13	https://www.genome.jp/dbget-bin/www_bget?map00941	cpd:C12123 4,7-Dihydroxyflavone;cpd:C12136 (-)-Epigallocatechin;cpd:C09320 (+)-Afzelechin;cpd:C12128 (-)-Epiafzelechin;cpd:C05904 Pelargonidin;cpd:C01514 Luteolin;cpd:C16422 Hesperetin 7-O-glucoside;cpd:C09827 Pinocembrin;cpd:C06561 Naringenin chalcone;cpd:C01378 Fustin;cpd:C01709 Hesperetin;cpd:C08650 isoliquiritigenin;cpd:C09751 Garbanzol;	gene-KI387_010353|gene-KI387_032550|gene-KI387_010354|gene-KI387_017999|gene-KI387_019741|gene-KI387_007081|gene-KI387_016110|gene-KI387_018140|Novel05707|Novel06473|gene-KI387_035544|gene-KI387_031075|Novel06474|gene-KI387_015535|gene-KI387_025615|Novel03971|gene-KI387_033140|gene-KI387_039188|gene-KI387_016109|gene-KI387_018156|gene-KI387_018139|gene-KI387_027480|Novel06838|gene-KI387_010204|ge…
ko00740	Metabolism	Metabolism of cofactors and vitamins	Riboflavin metabolism	6	1	https://www.genome.jp/dbget-bin/www_bget?map00740	cpd:C03114 Dimethylbenzimidazole;	gene-KI387_014214|gene-KI387_027874|Novel00807|gene-KI387_006788|Novel02429|Novel00626
ko00860	Metabolism	Metabolism of cofactors and vitamins	Porphyrin and chlorophyll metabolism	12	2	https://www.genome.jp/dbget-bin/www_bget?map00860	cpd:C00188 L-Threonine;cpd:C03114 Dimethylbenzimidazole;	Novel04287|gene-KI387_011705|gene-KI387_031803|gene-KI387_001613|gene-KI387_034742|gene-KI387_026259|gene-KI387_026850|gene-KI387_027652|gene-KI387_017117|gene-KI387_039683|gene-KI387_001533|gene-KI387_035971
ko00340	Metabolism	Amino acid metabolism	Histidine metabolism	9	4	https://www.genome.jp/dbget-bin/www_bget?map00340	cpd:C04677 AICAR;cpd:C00049 L-Aspartic acid;cpd:C01152 3-Methy-L-histidine;cpd:C00135 L-Histidine;	gene-KI387_016327|gene-KI387_030917|gene-KI387_008351|gene-KI387_018388|gene-KI387_022362|gene-KI387_008480|gene-KI387_019408|gene-KI387_029182|gene-KI387_018385
ko01230	Metabolism	Global and overview maps	Biosynthesis of amino acids	69	14	https://www.genome.jp/dbget-bin/www_bget?map01230	cpd:C00407 L-Isoleucine;cpd:C00188 L-Threonine;cpd:C00049 L-Aspartic acid;cpd:C00263 L-Homoserine;cpd:C00956 L-Homoglutamic acid;cpd:C01250 N-Acetyl-L-glutamate 5-semialdehyde;cpd:C00327 L-Citruline;cpd:C00062 L-Arginine;cpd:C00148 Proline;cpd:C00047 L-Lysine;cpd:C00041 L-Alanine;cpd:C00152 L-Asparagine;cpd:C00135 L-Histidine;cpd:C00082 L-Tyrosine;	gene-KI387_013833|Novel06680|Novel05342|gene-KI387_006311|gene-KI387_038959|gene-KI387_022988|gene-KI387_030823|gene-KI387_023286|gene-KI387_018388|gene-KI387_011849|gene-KI387_035754|gene-KI387_024281|gene-KI387_031955|gene-KI387_025622|gene-KI387_029182|gene-KI387_018385|gene-KI387_018946|gene-KI387_018944|gene-KI387_007772|gene-KI387_032476|gene-KI387_026473|gene-KI387_024760|gene-KI387_003201…
ko00460	Metabolism	Metabolism of other amino acids	Cyanoamino acid metabolism	44	4	https://www.genome.jp/dbget-bin/www_bget?map00460	cpd:C00049 L-Aspartic acid;cpd:C00152 L-Asparagine;cpd:C00082 L-Tyrosine;cpd:C00407 L-Isoleucine;	gene-KI387_034298|gene-KI387_034056|gene-KI387_019359|Novel03458|gene-KI387_020299|gene-KI387_000674|gene-KI387_020323|gene-KI387_000676|gene-KI387_041401|gene-KI387_001130|gene-KI387_002095|gene-KI387_002455|gene-KI387_016032|gene-KI387_017209|gene-KI387_018107|gene-KI387_002059|gene-KI387_018315|Novel02259|Novel05528|Novel06909|gene-KI387_012990|gene-KI387_038720|gene-KI387_018402|gene-KI387_03…
ko00520	Metabolism	Carbohydrate metabolism	Amino sugar and nucleotide sugar metabolism	59	2	https://www.genome.jp/dbget-bin/www_bget?map00520	cpd:C01674 N,N-diacetylchitobiose;cpd:C00446 Galactose 1-phosphate;	gene-KI387_014523|gene-KI387_024052|gene-KI387_042319|gene-KI387_036552|gene-KI387_004512|gene-KI387_027233|gene-KI387_017958|Novel01758|gene-KI387_030865|gene-KI387_014525|gene-KI387_001513|gene-KI387_027211|gene-KI387_025887|gene-KI387_028447|Novel01372|gene-KI387_019839|gene-KI387_006775|Novel02918|gene-KI387_039411|gene-KI387_035538|Novel01823|Novel02919|gene-KI387_000788|gene-KI387_000956|ge…
ko00970	Genetic Information Processing	Translation	Aminoacyl-tRNA biosynthesis	7	10	https://www.genome.jp/dbget-bin/www_bget?map00970	cpd:C00082 L-Tyrosine;cpd:C00188 L-Threonine;cpd:C00407 L-Isoleucine;cpd:C00047 L-Lysine;cpd:C00041 L-Alanine;cpd:C00049 L-Aspartic acid;cpd:C00148 Proline;cpd:C00062 L-Arginine;cpd:C00135 L-Histidine;cpd:C00152 L-Asparagine;	Novel05363|gene-KI387_014733|gene-KI387_017606|gene-KI387_009501|Novel06058|gene-KI387_024913|gene-KI387_036092
ko00040	Metabolism	Carbohydrate metabolism	Pentose and glucuronate interconversions	34	2	https://www.genome.jp/dbget-bin/www_bget?map00040	cpd:C03033 Tetrahydroaldosterone-3-glucuronide;cpd:C00310 D-Xylulose;	Novel04265|gene-KI387_030823|gene-KI387_007479|gene-KI387_010883|gene-KI387_010868|gene-KI387_002725|gene-KI387_002720|gene-KI387_002728|gene-KI387_035538|gene-KI387_026504|gene-KI387_023109|gene-KI387_031878|gene-KI387_033493|Novel01943|gene-KI387_029541|gene-KI387_000422|gene-KI387_029394|gene-KI387_002287|gene-KI387_009922|gene-KI387_019991|gene-KI387_018396|gene-KI387_018395|gene-KI387_004505…
ko00300	Metabolism	Amino acid metabolism	Lysine biosynthesis	3	4	https://www.genome.jp/dbget-bin/www_bget?map00300	cpd:C00049 L-Aspartic acid;cpd:C00263 L-Homoserine;cpd:C00047 L-Lysine;cpd:C00956 L-Homoglutamic acid;	Novel06050|gene-KI387_032801|gene-KI387_024281
ko00565	Metabolism	Lipid metabolism	Ether lipid metabolism	18	1	https://www.genome.jp/dbget-bin/www_bget?map00565	cpd:C00670 Glycerophosphocholine;	gene-KI387_007859|gene-KI387_038093|gene-KI387_036012|gene-KI387_043671|gene-KI387_034877|gene-KI387_035141|gene-KI387_036013|Novel03098|Novel04864|gene-KI387_015288|gene-KI387_021407|gene-KI387_041080|Novel02224|gene-KI387_032107|gene-KI387_012571|gene-KI387_013669|gene-KI387_030956|gene-KI387_013670
ko00051	Metabolism	Carbohydrate metabolism	Fructose and mannose metabolism	29	2	https://www.genome.jp/dbget-bin/www_bget?map00051	cpd:C03267 Beta-D-Fructose 2-phosphate;cpd:C00794 D-Sorbitol;	gene-KI387_005646|Novel04265|Novel05342|gene-KI387_020340|gene-KI387_011849|gene-KI387_004512|gene-KI387_034690|gene-KI387_029541|gene-KI387_023109|gene-KI387_022290|gene-KI387_027838|gene-KI387_012691|gene-KI387_005539|gene-KI387_024214|gene-KI387_031071|gene-KI387_019991|gene-KI387_004789|gene-KI387_025887|gene-KI387_025886|gene-KI387_011850|gene-KI387_002566|gene-KI387_016363|gene-KI387_014874…
ko00500	Metabolism	Carbohydrate metabolism	Starch and sucrose metabolism	74	4	https://www.genome.jp/dbget-bin/www_bget?map00500	cpd:C00092 D-Glucose 6-phosphate;cpd:C00089 Sucrose;cpd:C03033 Tetrahydroaldosterone-3-glucuronide;cpd:C00208 D-Maltose;	Novel04564|Novel03377|gene-KI387_016721|Novel03375|gene-KI387_032496|gene-KI387_027233|gene-KI387_020512|gene-KI387_020299|gene-KI387_039849|gene-KI387_000674|gene-KI387_020323|gene-KI387_000676|gene-KI387_041401|gene-KI387_001130|gene-KI387_002095|gene-KI387_002093|gene-KI387_002455|gene-KI387_016032|gene-KI387_017209|gene-KI387_031081|Novel06037|gene-KI387_025580|gene-KI387_018315|gene-KI387_00…
ko00020	Metabolism	Carbohydrate metabolism	Citrate cycle (TCA cycle)	19	1	https://www.genome.jp/dbget-bin/www_bget?map00020	cpd:C00417 cis-Aconitic acid;	gene-KI387_032601|gene-KI387_010406|gene-KI387_002431|gene-KI387_001376|gene-KI387_001375|gene-KI387_021656|gene-KI387_039159|Novel06148|gene-KI387_006517|gene-KI387_014224|gene-KI387_035370|gene-KI387_036183|gene-KI387_010745|gene-KI387_023991|gene-KI387_038701|Novel06147|gene-KI387_002665|gene-KI387_017394|gene-KI387_025057
ko00195	Metabolism	Energy metabolism	Photosynthesis	20	1	https://www.genome.jp/dbget-bin/www_bget?map00195	cpd:C00009 Phosphoric acid;	gene-KI387_035223|Novel02292|gene-KI387_031170|gene-KI387_022438|gene-KI387_023721|gene-KI387_016931|gene-KI387_007063|gene-KI387_019338|gene-KI387_039857|gene-KI387_009529|gene-KI387_014403|gene-KI387_034765|Novel00947|gene-KI387_033419|gene-KI387_013475|gene-KI387_010208|gene-KI387_029386|gene-KI387_038076|gene-KI387_025953|gene-KI387_036372
ko00330	Metabolism	Amino acid metabolism	Arginine and proline metabolism	18	6	https://www.genome.jp/dbget-bin/www_bget?map00330	cpd:C00062 L-Arginine;cpd:C00334 4-Aminobutyric acid;cpd:C01157 trans-4-Hydroxy-L-proline;cpd:C00148 Proline;cpd:C00431 5-Aminovaleric acid;cpd:C00763 D-Proline;	gene-KI387_004546|gene-KI387_022303|gene-KI387_035760|gene-KI387_023397|gene-KI387_022307|gene-KI387_028625|gene-KI387_022309|gene-KI387_016327|gene-KI387_009433|gene-KI387_017085|gene-KI387_005437|gene-KI387_031018|gene-KI387_004544|gene-KI387_008480|gene-KI387_022294|gene-KI387_002698|gene-KI387_024910|gene-KI387_000579
ko00270	Metabolism	Amino acid metabolism	Cysteine and methionine metabolism	53	4	https://www.genome.jp/dbget-bin/www_bget?map00270	cpd:C00170 5-S-Methyl-5-thioadenosine;cpd:C00263 L-Homoserine;cpd:C00049 L-Aspartic acid;cpd:C00041 L-Alanine;	gene-KI387_009182|gene-KI387_011653|gene-KI387_009186|gene-KI387_031726|gene-KI387_008580|gene-KI387_024281|Novel07017|gene-KI387_008511|gene-KI387_003201|gene-KI387_024910|gene-KI387_018946|gene-KI387_018944|gene-KI387_009489|gene-KI387_022317|gene-KI387_030499|gene-KI387_008507|gene-KI387_008506|gene-KI387_034990|gene-KI387_008503|gene-KI387_041190|gene-KI387_002698|gene-KI387_008508|gene-KI387…
ko00280	Metabolism	Amino acid metabolism	Valine, leucine and isoleucine degradation	12	1	https://www.genome.jp/dbget-bin/www_bget?map00280	cpd:C00407 L-Isoleucine;	gene-KI387_018946|gene-KI387_026868|gene-KI387_018944|gene-KI387_035736|gene-KI387_009275|gene-KI387_034670|gene-KI387_016327|gene-KI387_028053|gene-KI387_028051|gene-KI387_008480|gene-KI387_022683|gene-KI387_022873
ko00950	Metabolism	Biosynthesis of other secondary metabolites	Isoquinoline alkaloid biosynthesis	8	3	https://www.genome.jp/dbget-bin/www_bget?map00950	cpd:C00082 L-Tyrosine;cpd:C04043 3,4-Dihydroxyphenylacetaldehyde;cpd:C16700 3,4-Dihydroxybenzaldehyde;	gene-KI387_028625|gene-KI387_023397|gene-KI387_039530|gene-KI387_026287|gene-KI387_015588|gene-KI387_008397|gene-KI387_002698|gene-KI387_008394
ko00770	Metabolism	Metabolism of cofactors and vitamins	Pantothenate and CoA biosynthesis	9	1	https://www.genome.jp/dbget-bin/www_bget?map00770	cpd:C00049 L-Aspartic acid;	gene-KI387_018946|gene-KI387_006311|gene-KI387_018944|gene-KI387_027081|gene-KI387_009275|gene-KI387_035521|Novel06680|gene-KI387_036923|gene-KI387_026056
ko00190	Metabolism	Energy metabolism	Oxidative phosphorylation	30	1	https://www.genome.jp/dbget-bin/www_bget?map00190	cpd:C00009 Phosphoric acid;	gene-KI387_027652|gene-KI387_013676|Novel06148|Novel06147|gene-KI387_002665|gene-KI387_014772|gene-KI387_014750|gene-KI387_025953|gene-KI387_019016|Novel03551|gene-KI387_009716|gene-KI387_006739|Novel02292|gene-KI387_022807|Novel07044|Novel03338|gene-KI387_002061|gene-KI387_028737|gene-KI387_028734|gene-KI387_033732|Novel04002|gene-KI387_030451|Novel04613|Novel00964|Novel00963|gene-KI387_043176|g…
ko00940	Metabolism	Biosynthesis of other secondary metabolites	Phenylpropanoid biosynthesis	134	3	https://www.genome.jp/dbget-bin/www_bget?map00940	cpd:C00082 L-Tyrosine;cpd:C01772 2-Hydroxycinnamic acid;cpd:C01494 Ferulic acid;	gene-KI387_009540|gene-KI387_023090|Novel06652|gene-KI387_020299|Novel02843|gene-KI387_029490|gene-KI387_026605|gene-KI387_028882|gene-KI387_015409|gene-KI387_002059|gene-KI387_023169|gene-KI387_023165|gene-KI387_023162|gene-KI387_023163|gene-KI387_023160|gene-KI387_019279|gene-KI387_019278|gene-KI387_028001|Novel03705|gene-KI387_033141|gene-KI387_033140|gene-KI387_000488|gene-KI387_015674|gene-K…
ko00430	Metabolism	Metabolism of other amino acids	Taurine and hypotaurine metabolism	8	1	https://www.genome.jp/dbget-bin/www_bget?map00430	cpd:C00041 L-Alanine;	gene-KI387_031172|gene-KI387_031129|Novel05915|Novel02259|gene-KI387_014575|gene-KI387_025209|gene-KI387_038720|gene-KI387_031130
ko00310	Metabolism	Amino acid metabolism	Lysine degradation	9	5	https://www.genome.jp/dbget-bin/www_bget?map00310	cpd:C00956 L-Homoglutamic acid;cpd:C00431 5-Aminovaleric acid;cpd:C05548 2-Keto-6-acetamidocaproate;cpd:C02727 N6-Acetyl-L-lysine;cpd:C00047 L-Lysine;	gene-KI387_032601|gene-KI387_020834|gene-KI387_020836|Novel01085|gene-KI387_016327|gene-KI387_035736|gene-KI387_008480|Novel03793|Novel00140
ko00400	Metabolism	Amino acid metabolism	Phenylalanine, tyrosine and tryptophan biosynthesis	17	1	https://www.genome.jp/dbget-bin/www_bget?map00400	cpd:C00082 L-Tyrosine;	gene-KI387_028625|gene-KI387_007772|gene-KI387_018788|gene-KI387_023397|gene-KI387_032476|gene-KI387_039530|gene-KI387_022988|gene-KI387_038959|gene-KI387_026473|gene-KI387_024760|gene-KI387_042576|Novel04070|gene-KI387_025622|gene-KI387_031368|gene-KI387_029182|gene-KI387_002698|gene-KI387_001410
ko00380	Metabolism	Amino acid metabolism	Tryptophan metabolism	9	1	https://www.genome.jp/dbget-bin/www_bget?map00380	cpd:C01717 Kynurenic acid;	gene-KI387_032601|gene-KI387_022303|gene-KI387_035736|gene-KI387_022307|gene-KI387_016327|gene-KI387_022309|gene-KI387_007321|gene-KI387_025672|gene-KI387_008480
ko00410	Metabolism	Metabolism of other amino acids	beta-Alanine metabolism	13	3	https://www.genome.jp/dbget-bin/www_bget?map00410	cpd:C00049 L-Aspartic acid;cpd:C00135 L-Histidine;cpd:C00334 4-Aminobutyric acid;	gene-KI387_026287|gene-KI387_037442|gene-KI387_037443|gene-KI387_016327|gene-KI387_014575|gene-KI387_028053|gene-KI387_031018|gene-KI387_028051|gene-KI387_008480|gene-KI387_022683|gene-KI387_025209|gene-KI387_024910|gene-KI387_039315
ko04122	Genetic Information Processing	Folding, sorting and degradation	Sulfur relay system	3	2	https://www.genome.jp/dbget-bin/www_bget?map04122	cpd:C00041 L-Alanine;cpd:C00378 Thiamine;	gene-KI387_013169|gene-KI387_023865|Novel03125
ko00230	Metabolism	Nucleotide metabolism	Purine metabolism	20	8	https://www.genome.jp/dbget-bin/www_bget?map00230	cpd:C00020 Adenosine 5-monophosphate;cpd:C00147 Adenine;cpd:C00294 Inosine;cpd:C00387 Guanosine;cpd:C01762 Xanthosine;cpd:C04677 AICAR;cpd:C00942 Guanosine 3,5-cyclic monophosphate;cpd:C02353 Adenosine 2,3-cyclic phosphate;	gene-KI387_030437|gene-KI387_004986|gene-KI387_021633|gene-KI387_035356|Novel02305|gene-KI387_028062|gene-KI387_008557|gene-KI387_030495|gene-KI387_035983|gene-KI387_009470|gene-KI387_007535|gene-KI387_026009|gene-KI387_035754|gene-KI387_022690|gene-KI387_005181|gene-KI387_013763|gene-KI387_017305|gene-KI387_003207|gene-KI387_015278|gene-KI387_024901
ko00630	Metabolism	Carbohydrate metabolism	Glyoxylate and dicarboxylate metabolism	14	1	https://www.genome.jp/dbget-bin/www_bget?map00630	cpd:C00417 cis-Aconitic acid;	gene-KI387_037286|gene-KI387_022829|Novel06724|gene-KI387_015469|gene-KI387_035736|gene-KI387_036183|gene-KI387_031855|gene-KI387_018785|gene-KI387_015468|gene-KI387_035370|gene-KI387_003087|gene-KI387_021656|gene-KI387_025746|gene-KI387_022306
ko00780	Metabolism	Metabolism of cofactors and vitamins	Biotin metabolism	6	2	https://www.genome.jp/dbget-bin/www_bget?map00780	cpd:C02656 Pimelic acid;cpd:C00047 L-Lysine;	gene-KI387_033825|gene-KI387_042547|gene-KI387_021982|gene-KI387_033745|gene-KI387_031196|Novel04667
ko00290	Metabolism	Amino acid metabolism	Valine, leucine and isoleucine biosynthesis	7	2	https://www.genome.jp/dbget-bin/www_bget?map00290	cpd:C00188 L-Threonine;cpd:C00407 L-Isoleucine;	gene-KI387_018946|gene-KI387_013833|gene-KI387_018944|Novel06680|gene-KI387_009275|gene-KI387_006311|Novel02112
ko01110	Metabolism	Global and overview maps	Biosynthesis of secondary metabolites	525	43	https://www.genome.jp/dbget-bin/www_bget?map01110	cpd:C00755 Vanillin;cpd:C00180 Benzoic acid;cpd:C11635 Tombozine;cpd:C07480 Theobromine;cpd:C16431 trans-Zeatin-riboside;cpd:C01851 Scopolamine;cpd:C10208 Daidzein;cpd:C06563 Genistein;cpd:C05625 Rutin;cpd:C09320 (+)-Afzelechin;cpd:C01772 2-Hydroxycinnamic acid;cpd:C10682 Matairesinol;cpd:C00407 L-Isoleucine;cpd:C00188 L-Threonine;cpd:C01250 N-Acetyl-L-glutamate 5-semialdehyde;cpd:C00148 Proline;…	gene-KI387_023090|gene-KI387_011705|gene-KI387_026473|gene-KI387_005737|gene-KI387_030868|gene-KI387_003207|gene-KI387_003201|gene-KI387_002665|gene-KI387_018946|gene-KI387_007081|gene-KI387_039361|gene-KI387_011832|gene-KI387_030330|gene-KI387_022829|gene-KI387_012691|gene-KI387_007810|gene-KI387_033140|gene-KI387_015674|gene-KI387_027794|gene-KI387_000264|gene-KI387_027081|Novel00598|gene-KI387…
ko00220	Metabolism	Amino acid metabolism	Arginine biosynthesis	8	4	https://www.genome.jp/dbget-bin/www_bget?map00220	cpd:C00327 L-Citruline;cpd:C00062 L-Arginine;cpd:C00049 L-Aspartic acid;cpd:C01250 N-Acetyl-L-glutamate 5-semialdehyde;	gene-KI387_037286|gene-KI387_028625|gene-KI387_023397|gene-KI387_016009|gene-KI387_015468|gene-KI387_015469|gene-KI387_024533|gene-KI387_002698
ko00564	Metabolism	Lipid metabolism	Glycerophospholipid metabolism	41	2	https://www.genome.jp/dbget-bin/www_bget?map00564	cpd:C00588 Phosphorylcholine;cpd:C00670 Glycerophosphocholine;	gene-KI387_013340|gene-KI387_038093|gene-KI387_036012|Novel06296|Novel03098|gene-KI387_010260|gene-KI387_008872|gene-KI387_015288|gene-KI387_027558|gene-KI387_002497|gene-KI387_013670|gene-KI387_025589|gene-KI387_038057|gene-KI387_030645|gene-KI387_034877|gene-KI387_015491|gene-KI387_018123|gene-KI387_030231|gene-KI387_021407|gene-KI387_041080|gene-KI387_027559|gene-KI387_032107|gene-KI387_036013…
ko00052	Metabolism	Carbohydrate metabolism	Galactose metabolism	41	3	https://www.genome.jp/dbget-bin/www_bget?map00052	cpd:C00446 Galactose 1-phosphate;cpd:C00089 Sucrose;cpd:C00794 D-Sorbitol;	gene-KI387_016417|gene-KI387_011272|Novel05342|gene-KI387_036112|gene-KI387_024632|gene-KI387_038990|gene-KI387_037849|gene-KI387_022407|gene-KI387_011849|gene-KI387_035538|gene-KI387_034174|gene-KI387_014960|gene-KI387_014961|gene-KI387_014962|gene-KI387_014963|gene-KI387_014964|Novel03195|gene-KI387_014966|gene-KI387_014967|gene-KI387_022010|gene-KI387_038981|gene-KI387_022290|gene-KI387_037323…
ko00562	Metabolism	Carbohydrate metabolism	Inositol phosphate metabolism	29	1	https://www.genome.jp/dbget-bin/www_bget?map00562	cpd:C00092 D-Glucose 6-phosphate;	gene-KI387_016358|gene-KI387_005875|gene-KI387_025456|gene-KI387_013670|gene-KI387_011785|gene-KI387_019509|gene-KI387_019508|gene-KI387_022155|gene-KI387_022156|gene-KI387_007364|gene-KI387_041080|gene-KI387_010050|gene-KI387_042616|Novel06296|gene-KI387_037209|gene-KI387_029961|Novel03847|Novel07608|gene-KI387_028163|gene-KI387_012571|gene-KI387_042612|gene-KI387_011792|gene-KI387_013669|gene-K…
ko00906	Metabolism	Metabolism of terpenoids and polyketides	Carotenoid biosynthesis	26	1	https://www.genome.jp/dbget-bin/www_bget?map00906	cpd:C08580 Astaxanthin;	gene-KI387_010014|gene-KI387_010017|gene-KI387_007803|gene-KI387_020048|gene-KI387_007805|gene-KI387_012085|gene-KI387_012086|gene-KI387_013018|gene-KI387_023992|gene-KI387_024709|gene-KI387_030368|gene-KI387_018415|gene-KI387_018416|gene-KI387_030365|gene-KI387_030366|Novel05039|Novel07041|Novel07040|gene-KI387_006378|gene-KI387_029373|gene-KI387_007810|gene-KI387_012090|gene-KI387_016045|gene-K…
ko00073	Metabolism	Lipid metabolism	Cutin, suberine and wax biosynthesis	18	1	https://www.genome.jp/dbget-bin/www_bget?map00073	cpd:C00712 Oleic acid;	gene-KI387_018858|Novel02928|gene-KI387_001502|gene-KI387_025701|Novel00275|gene-KI387_000618|gene-KI387_022731|gene-KI387_022732|Novel00797|Novel05663|gene-KI387_022734|gene-KI387_039193|gene-KI387_038618|gene-KI387_042791|gene-KI387_022733|gene-KI387_034722|gene-KI387_037183|gene-KI387_037191
ko00966	Metabolism	Biosynthesis of other secondary metabolites	Glucosinolate biosynthesis	2	2	https://www.genome.jp/dbget-bin/www_bget?map00966	cpd:C00082 L-Tyrosine;cpd:C00407 L-Isoleucine;	gene-KI387_025672|Novel03458
ko00130	Metabolism	Metabolism of cofactors and vitamins	Ubiquinone and other terpenoid-quinone biosynthesis	11	1	https://www.genome.jp/dbget-bin/www_bget?map00130	cpd:C00082 L-Tyrosine;	gene-KI387_010353|gene-KI387_015766|gene-KI387_017321|gene-KI387_010354|gene-KI387_027709|gene-KI387_003238|gene-KI387_010204|gene-KI387_000967|gene-KI387_007543|gene-KI387_028882|Novel05322
ko00944	Metabolism	Biosynthesis of other secondary metabolites	Flavone and flavonol biosynthesis	5	3	https://www.genome.jp/dbget-bin/www_bget?map00944	cpd:C05625 Rutin;cpd:C12249 Astragalin;cpd:C01514 Luteolin;	gene-KI387_021456|Novel07406|Novel03971|gene-KI387_032550|gene-KI387_038757
ko02010	Environmental Information Processing	Membrane transport	ABC transporters	16	15	https://www.genome.jp/dbget-bin/www_bget?map02010	cpd:C01835 Maltotriose;cpd:C00208 D-Maltose;cpd:C00794 D-Sorbitol;cpd:C00047 L-Lysine;cpd:C00062 L-Arginine;cpd:C00049 L-Aspartic acid;cpd:C00135 L-Histidine;cpd:C00407 L-Isoleucine;cpd:C00188 L-Threonine;cpd:C00089 Sucrose;cpd:C00009 Phosphoric acid;cpd:C00148 Proline;cpd:C00378 Thiamine;cpd:C00041 L-Alanine;cpd:C01674 N,N-diacetylchitobiose;	gene-KI387_013955|gene-KI387_005512|gene-KI387_037059|gene-KI387_028126|gene-KI387_028118|Novel07338|gene-KI387_038993|gene-KI387_006664|Novel05050|gene-KI387_025520|gene-KI387_010126|gene-KI387_012774|gene-KI387_012777|gene-KI387_039694|gene-KI387_003320|gene-KI387_008030
ko00960	Metabolism	Biosynthesis of other secondary metabolites	Tropane, piperidine and pyridine alkaloid biosynthesis	8	3	https://www.genome.jp/dbget-bin/www_bget?map00960	cpd:C00407 L-Isoleucine;cpd:C01851 Scopolamine;cpd:C00047 L-Lysine;	gene-KI387_028625|gene-KI387_023397|gene-KI387_039530|gene-KI387_026287|gene-KI387_005159|gene-KI387_005156|gene-KI387_029182|gene-KI387_002698
